# Supplementary material for: Burden of Streptococcus pneumoniae and Haemophilus influenzae type b disease in children in the era of conjugate vaccines: global, regional, and national estimates for 2000–15
Source: PubMed Central journal article supplement (PMC6005122; doi:10.1016/s2214-109x(18)30247-x), 2018-06-13
Supplement: mmc1.pdf [file mmc1.pdf]

# THE LANCET

## Global Health

### Supplementary appendix

This appendix formed part of the original submission and has been peer reviewed.  
We post it as supplied by the authors.

Supplement to: Wahl B, O'Brien KL, Greenbaum A, et al. Burden of *Streptococcus pneumoniae* and *Haemophilus influenzae* type b disease in children in the era of conjugate vaccines: global, regional, and national estimates for 2000–15. *Lancet Glob Health* 2018; **6**: e744–57.

**Webappendix:** Global, regional, and national burden of *Streptococcus pneumoniae* and *Haemophilus influenzae* type b in children in the era of conjugate vaccines: estimates for 2000-2015

**Authors:** Brian Wahl, MPH (1), Katherine L O'Brien, MD (1), Adena Greenbaum, MD (1), Anwasha Majumder, MHS (1), Li Liu, PhD (2, 3), Yue Chu, MSPH (2), Ivana Lukšić, MD (4), Harish Nair, PhD (5,6), David A McAllister, MD (5), Harry Campbell, MD (5), Igor Rudan, MD (5), Robert Black, MD (2), Maria Deloria Knoll, PhD (1)

- International Vaccine Access Center (IVAC), Department of International Health, Johns Hopkins Bloomberg School of Public Health, 415 N Washington Street, Floor 5, Baltimore, MD 21231, USA
- Institute for International Programs, Department of International Health, Johns Hopkins Bloomberg School of Public Health, 615 N Wolfe St, Baltimore, MD 21205, USA
- Department of Population, Family and Reproductive Health, Johns Hopkins Bloomberg School of Public Health, 615 N Wolfe St, Baltimore, MD 21205, USA
- Department of Microbiology, Dr. Andrija Štampar Institute of Public Health, Mirogojska 16, 10000 Zagreb, Croatia
- Usher Institute of Population Health Sciences and Informatics, Medical School, The University of Edinburgh, Teviot Place, Edinburgh EH8 9AG, Scotland, UK
- Public Health Foundation of India, New Delhi, India

**Correspondence:** Brian Wahl; International Vaccine Access Center (IVAC), Department of International Health, Johns Hopkins Bloomberg School of Public Health, 415 N Washington Street, Floor 5, Baltimore, MD 21231, USA; [bwahl@jhu.edu](mailto:bwahl@jhu.edu)

## Contents

- [Webappendix 1](#): Literature review
- [Webappendix 2](#): Details of disease burden data inputs
- [Webappendix 3](#): Analysis of pneumonia impact studies to inform proportion of pneumonia morbidity and mortality attributable to *Streptococcus pneumoniae* and *Haemophilus influenzae* type b
- [Webappendix 4](#): Proportion of pneumonia morbidity and mortality attributable to *Streptococcus pneumoniae* and *Haemophilus influenzae* type b
- [Webappendix 5](#): Details of sensitivity analysis on proportion of pneumonia deaths attributable to *Streptococcus pneumoniae*
- [Webappendix 6](#): Methods used for stratifying pneumonia and meningitis deaths by age (i.e., 1-23 months and 24-59 months) for estimating the burden of Hib disease
- [Webappendix 7](#): Methods used to estimate the proportion of meningitis deaths attributable to each pathogen.
- [Webappendix 8](#): Equation used to account for increased risk of Hib and pneumococcal disease in children infected with HIV
- [Webappendix 9](#): External review members
- [Webappendix 10](#): GATHER checklist
- [Webappendix 11](#): Country-level *Streptococcus pneumoniae* and *Haemophilus influenzae* type b disease burden estimates by syndrome for 2000-2015 in children 1-59 months
- [Webappendix 12](#): Comparison of *Streptococcus pneumoniae* pneumonia mortality sensitivity analyses for 2000-2015 in children 1-59 months
- [Webappendix 13](#): Comparison of meningitis mortality and morbidity estimates, proportional approach versus incidence approach
- [Webappendix 14](#): Plausibility check for pneumococcal morbidity and mortality

## List of tables and figures

1. Systematic review PRISMA flow diagram of studies
2. Studies contributing to estimates of pneumonia morbidity and mortality attributable fractions
3. Studies contributing to estimates of pathogen-specific meningitis case fatality ratio estimates stratified by child mortality setting
4. Studies contributing to the distribution of meningitis cases by bacterial pathogen, stratified by geographic region
5. Other indicators used for modeling Hib and pneumococcal disease burden
6. Flow Diagram of PCV Impact studies for Use in Determining the Proportion of Pneumonia Deaths Attributable to Pneumococcus
7. Proportion of radiography-confirmed pneumonia attributable to pneumococcus
8. Proportion of severe pneumonia attributable to pneumococcus
9. Proportion of clinical pneumonia attributable to pneumococcus
10. Proportion of radiography-confirmed pneumonia attributable to Hib
11. Proportion of severe pneumonia attributable to Hib
12. Proportion of clinical pneumonia attributable to Hib

13. Estimates of radiography-confirmed pneumonia attributable to pneumococcus in the absence of vaccination using different adjustments to account for incomplete efficacy against VT pneumococcal pneumonia in the absence of vaccination with PCV or Hib vaccine
14. Impact of PCV on all-cause pneumonia hospitalizations stratified by age-group
15. Pneumococcal and Hib mortality estimates by syndrome, country, and year
16. Comparison of pneumococcal pneumonia mortality estimates with sensitivity analysis on vaccine-type pneumococcal pneumonia efficacy
17. Pneumococcal meningitis cases by approach for 2000-2015
18. Pneumococcal meningitis deaths by approach for 2000-2015
19. Hib meningitis cases by approach for 2000-2015
20. Hib meningitis deaths by approach for 2000-2015

## Webappendix 1: Literature review

### Data sources

For the pneumonia models, we identified PCV and Hib vaccine trials and effectiveness studies from a systematic review of the literature and a Cochrane review of PCV efficacy.<sup>1</sup> We also updated a systematic review of pneumococcal and Hib invasive disease from 1980-2005<sup>2</sup> with published and unpublished data through 2014 for the pathogen-specific meningitis and NPNM models. We searched six global databases (i.e., PubMed, Embase, Biosis, Cochrane, Global Health, Pascal) and five regional databases (i.e., IMEMR, IMSEAR, LILACS, WHOLIS, WPRIM) and followed the same quality assessment criteria described in the previously published literature review.<sup>2</sup> We also used unpublished data from the Hib Rapid Assessment Tool and WHO Invasive Bacterial Disease surveillance network.<sup>3</sup> Other model parameter values were obtained from publicly available sources or personal communication. We used state-specific input values for India whenever possible to account for wide disparities across states.

### Literature review methods

The existing systematic literature review<sup>2</sup> of pneumococcal and Hib disease data from 1980-2005 was updated to include published and unpublished literature through 2014, including data on pathogen-specific meningitis case fatality ratio (CFR), the etiologic distribution of bacterial meningitis cases, and pathogen-specific meningitis. We also used unpublished data from the Hib Rapid Assessment Tool and WHO Invasive Bacterial Disease surveillance network.<sup>3</sup>

The literature review was conducted in several phases. Published studies were identified through six global databases (i.e., PubMed, Embase, Biosis, Cochrane, Global Health, Pascal) and five regional databases (i.e., IMEMR, IMSEAR, LILACS, WHOLIS, WPRIM). Using an online systematic review platform, DistillerSR (<https://www.evidencepartners.com>), two reviewers screened each article based on titles and abstracts. Next, the full text of studies meeting the inclusion criteria based on title and abstract were screened again by two reviewers. Finally, two reviewers reviewed studies one additional time, extracted relevant data, and assessed quality for those that met the inclusion criteria. Two lead reviewers adjudicated conflicting reviews. The PRISMA flow diagram of studies is described in Figure 1. In total, 378 studies published between 1990 and 2014 were identified that contributed data to at least one of the pathogen-specific syndromic models – 150 were identified in the updated literature review (i.e., 2010 to 2014).

### PubMed Search Strategy

#### **Concept 1: *Streptococcus pneumoniae***

"Streptococcus pneumoniae"[Mesh] OR "streptococcus pneumoniae"[all fields] OR "streptococcal pneumonia"[all fields] OR "diplococcus pneumoniae"[all fields] OR "pneumococcus"[all fields] OR "pneumococcic pneumonia"[all fields] OR "s pneumoniae"[all fields] OR "pneumococci"[all fields] OR "pneumococcal"[all fields] OR "Pneumococcal

Vaccines"[Mesh] OR "prevnar"[all fields] OR "pnu-imune 23"[all fields] OR " 7-valent pncomp vaccine"[all fields] OR "pncrm7"[all fields] OR "mnc-crm197"[all fields] OR "mncc"[all fields] OR "pneumovax"[all fields] OR "pnu-imune vaccine"[all fields] OR "pcv 7"[all fields] OR "pcv 10"[all fields] OR "pcv 13"[all fields] OR "prevenar"[all fields] OR "prevnar"[all fields] OR "streptorix"[all fields] OR "synflorix"[all fields]

### **Concept 2: *Haemophilus influenzae* type b (Hib)**

"Haemophilus influenzae"[Mesh] OR "haemophilus influenzae type b"[Mesh] OR haemophilus influenzae"[Mesh] OR "diphtheria pertussis poliomyelitis tetanus haemophilus influenzae type b hepatitis b vaccine"[all fields] OR "diphtheria pertussis tetanus haemophilus influenzae type b vaccine"[all fields] OR "diphtheria pertussis tetanus haemophilus influenzae type b vaccine"[all fields] OR "haemophilus influenzae type b dtp vaccine"[all fields] OR "haemophilus influenzae type b hepatitis b vaccine"[all fields] OR "haemophilus influenzae type b vaccine"[all fields] OR "hepatitis b haemophilus influenzae type b vaccine"[all fields] OR "hib ompc"[all fields] OR "hib vax"[all fields] OR "h influenzae"[all fields] OR "hib disease"[all fields] OR "hib infection"[all fields] OR "hib immuni"[all fields] OR "hemophilus influ"[all fields] OR "hemophilus influenzae"[all fields]

### **Concept 3: Disease**

"invasive pneumococcal disease"[all fields] OR "pneumococcal invasive disease"[all fields] OR "Streptococcal Infections"[Mesh] OR "Streptococcal Infections"[all fields] OR "Streptococcal Infection"[all fields] OR "streptococcus infection" OR "Meningitis, Pneumococcal"[Mesh] OR "pneumococcal bacteraemia" OR "Meningitis, Bacterial"[Mesh] OR "Bacterial Infections"[Mesh] OR "bacterial infection" OR "bacterial infections" OR "Meningitis"[Mesh] OR "meningitis" OR "meningitides" OR "meningeal" OR "perimeningeal" OR "Respiratory Tract Diseases"[Mesh] OR "respiratory tract disease"[all fields] OR "respiratory tract diseases"[all fields] OR "airway disease"[all fields] OR "airway diseases"[all fields] OR "airway disorder"[all fields] OR "airway disorders"[all fields] OR "respiratory disease"[all fields] OR "respiratory disorder"[all fields] OR "respiratory disorders"[all fields] OR "respiratory illness"[all fields] OR "respiratory tract diseases"[all fields] OR "respiratory tract disease"[all fields] OR "respiratory tract disorder"[all fields] OR "respiratory tract disorders"[all fields] OR "lower respiratory tract infection"[all fields] OR "lower respiratory tract infections"[all fields] OR "lower respiration tract infections"[all fields] OR "lung infection"[all fields] OR "lung infections"[all fields] OR "pulmonary infection"[all fields] OR "pulmonary infections"[all fields] OR "Pneumonia, Bacterial"[Mesh] OR "pneumonia"[mesh] OR "pneumonia"[all fields] OR "pneumonic"[all fields] OR "Pneumonias"[all fields] OR "Pneumonitis"[all fields] OR "Pneumonitides"[all fields] OR "pleuropneumonia"[all fields] OR "pleuropneumonitis"[all fields] OR "Pulmonary Inflammation"[all fields] OR "alri"[all fields] OR "peripneumonia"[all fields] OR "pulmonary inflammation"[all fields] OR "Bacteremia"[Mesh] OR "bacteremia"[all fields] OR "bacteremias"[all fields] OR "septicemia"[all fields] OR "septicaemia"[all fields] OR "Sepsis"[Mesh] OR "sepsis"[all fields] OR "Pyemia"[all fields] OR "Pyemias"[all fields] OR "Pyohemia"[all fields] OR "Pyaemia"[all fields] OR "infectious pneumopath"[all fields]

**Concept 4: Age group**

"child"[mesh] OR "child"[all fields] OR "children"[all fields] OR youth\* OR "young people"[all fields] OR "baby"[all fields] OR "babies"[all fields] OR "infant"[mesh] OR infant\* OR "childhood"[all fields] OR toddler\* OR "kid"[all fields] OR "kids"[all fields] OR "young patient"[all fields] OR "young patients"[all fields] OR "boy"[all fields] OR "boys"[all fields] OR girl\* OR "young age"[all fields] OR "child mortality"[mesh] OR "pediatric"[all fields] OR "Child, Preschool"[Mesh] OR "pre-schooler"[all fields] OR "preschooler"[all fields] OR "under 5"[all fields] OR "under five"[all fields] OR "under fives"[all fields] OR "less than five"[all fields]

**Concept 5: Exclusions**

NOT "Case Reports" [Publication Type] OR "case report"[all fields] OR "case reports"[all fields]  
NOT ("animals"[mh] NOT ("animals"[mh] AND "humans"[mh]))

Figure 1: Systematic review PRISMA flow diagram of studies

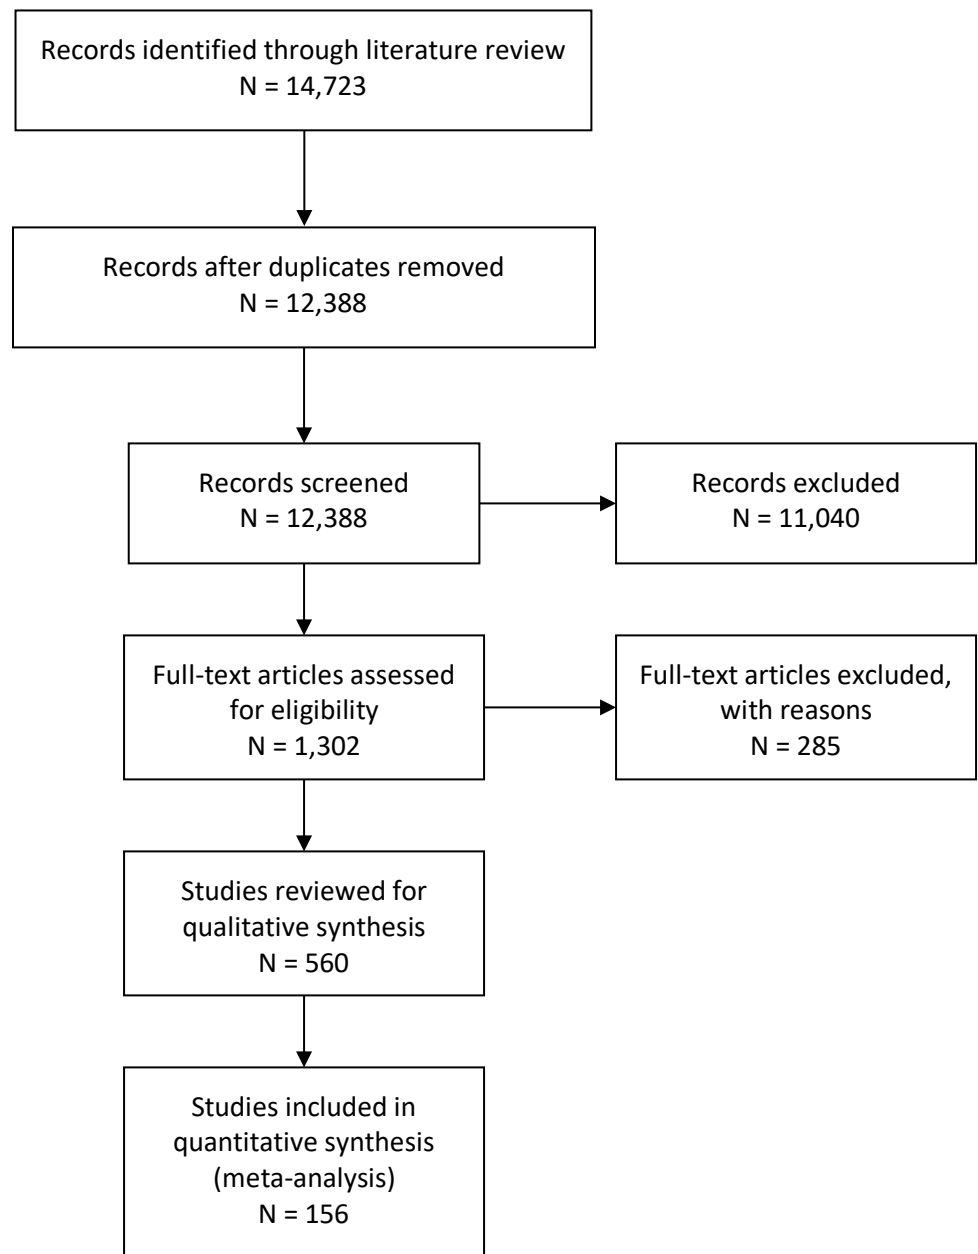

From: Moher D, Liberati A, Tetzlaff J, Altman DG, The PRISMA Group (2009). Preferred Reporting Items for Systematic Reviews and Meta-Analyses: The PRISMA Statement. PLoS Med 6(7): e1000097. doi:10.1371/journal.pmed1000097



### *Quality assessment criteria*

Quality assessments for studies reporting incidence, case fatality ratio, and the distribution of bacterial meningitis cases by etiology were based on two subjective criteria: (1) the likelihood of the study missing cases and (2) the reliability of the diagnostic methods for laboratory isolation. These criteria were assessed independently by two data reviewers during the data abstraction phase. Based on these criteria, studies were classified into one of three categories: "A" papers where both reviewers judged both criteria to have been met; "B" papers where only one reviewer judged each criterion to have been met; "C" papers where both reviewers judged that neither criterion had been met or data was not available to allow a judgment. Category "C" studies, as well as all included studies from Asia and Africa, underwent a third quality assessment before a decision was made about inclusion in the final data set for meningitis.

## Webappendix 2: Details of disease burden data inputs

Table 1: Studies contributing to estimates of pneumonia morbidity and mortality attributable fractions

| <b>a. <i>Streptococcus pneumoniae</i></b>                                                                                                                                                                                                                                                                                                                                                                                                                                                                                                                                                                                                                                                                                                                                                                                                               |
|---------------------------------------------------------------------------------------------------------------------------------------------------------------------------------------------------------------------------------------------------------------------------------------------------------------------------------------------------------------------------------------------------------------------------------------------------------------------------------------------------------------------------------------------------------------------------------------------------------------------------------------------------------------------------------------------------------------------------------------------------------------------------------------------------------------------------------------------------------|
| <b>United States (California)</b> <ul style="list-style-type: none"><li>• Black, S. B., et al. "Effectiveness of heptavalent pneumococcal conjugate vaccine in children younger than five years of age for prevention of pneumonia." <i>Pediatric Infectious Disease Journal</i> 21.9 (2002): 810-815.</li><li>• Hansen, J., et al. "Effectiveness of heptavalent pneumococcal conjugate vaccine in children younger than 5 years of age for prevention of pneumonia: updated analysis using World Health Organization standardized interpretation of chest radiographs." <i>Pediatric Infectious Disease Journal</i> 25.9 (2006): 779-781.</li><li>• Black, S. B., et al. "Efficacy, safety and immunogenicity of heptavalent pneumococcal conjugate vaccine in children." <i>Pediatric Infectious Disease Journal</i> 19.3 (2000): 187-195.</li></ul> |
| <b>South Africa</b> <ul style="list-style-type: none"><li>• Madhi, S. A., et al. "The impact of a 9-valent pneumococcal conjugate vaccine on the public health burden of pneumonia in HIV-infected and-uninfected children." <i>Clinical Infectious Diseases</i> 40.10 (2005): 1511-1518.</li><li>• Klugman, K. P., et al. "A trial of a 9-valent pneumococcal conjugate vaccine in children with and those without HIV infection." <i>New England Journal of Medicine</i> 349.14 (2003): 1341-1348.</li></ul>                                                                                                                                                                                                                                                                                                                                          |
| <b>The Gambia</b> <ul style="list-style-type: none"><li>• Cutts, F. T., et al. "Efficacy of nine-valent pneumococcal conjugate vaccine against pneumonia and invasive pneumococcal disease in The Gambia: randomised, double-blind, placebo-controlled trial." <i>The Lancet</i> 365.9465 (2005): 1139-1146.</li></ul>                                                                                                                                                                                                                                                                                                                                                                                                                                                                                                                                  |
| <b>The Philippines</b> <ul style="list-style-type: none"><li>• Lucero, M. G., et al. "Efficacy of an 11-valent pneumococcal conjugate vaccine against radiologically confirmed pneumonia among children less than 2 years of age in the Philippines: a randomized, double-blind, placebo-controlled trial." <i>Pediatric Infectious Disease Journal</i> 28.6 (2009): 455-462.</li><li>• Lupisan, S. P., et al. "Invasive bacterial infections of children in a rural province in the central Philippines." <i>American Journal of Tropical Medicine and Hygiene</i> 62.3 (2000): 341-346.</li></ul>                                                                                                                                                                                                                                                     |
| <b>South America</b> <ul style="list-style-type: none"><li>• Tregnaghi, M. W., et al. "Efficacy of pneumococcal nontypable <i>Haemophilus influenzae</i> protein D conjugate vaccine (PHiD-CV) in young Latin American children: a double-blind randomized controlled trial." <i>PLoS Med</i> 11.6 (2014): e1001657.</li></ul>                                                                                                                                                                                                                                                                                                                                                                                                                                                                                                                          |
| <b>Finland</b> <ul style="list-style-type: none"><li>• Kilpi, T., et al. "Effectiveness of Pneumococcal <i>Haemophilus influenzae</i> Protein D Conjugate Vaccine against Radiologically Confirmed Pneumonia." Interscience Conference on Antimicrobial Agents and Chemotherapy (ICAAC) 2014, Washington, D.C.</li><li>• Palmu, A. A., et al. "Effectiveness of the ten-valent pneumococcal <i>Haemophilus influenzae</i> protein D conjugate vaccine (PHiD-CV10) against invasive pneumococcal disease: a cluster randomised trial." <i>The Lancet</i>. 381.9862 (2013): 214-222.</li></ul>                                                                                                                                                                                                                                                            |

## ***b. Haemophilus influenzae* type b (Hib)**

### The Gambia

- Mulholland, Kim, et al. "Randomised trial of *Haemophilus influenzae* type-b tetanus protein conjugate for prevention of pneumonia and meningitis in Gambian infants." *The Lancet* 349.9060 (1997): 1191-1197. Ref 2

### Indonesia

- Gessner, Bradford D., et al. "Incidences of vaccine-preventable *Haemophilus influenzae* type b pneumonia and meningitis in Indonesian children: hamlet-randomised vaccine-probe trial." *The Lancet* 365.9453 (2005): 43-52.

### Bangladesh

- Baqui, Abdullah H., et al. "Effectiveness of *Haemophilus influenzae* type B conjugate vaccine on prevention of pneumonia and meningitis in Bangladeshi children: a case-control study." *Pediatric Infectious Disease Journal* 26.7 (2007): 565-571.

### Chile

- Levine, Orin S., et al. "Defining the burden of pneumonia in children preventable by vaccination against *Haemophilus influenzae* type b." *Pediatric Infectious Disease Journal* 18.12 (1999): 1060-1064.
- Lagos, Rosanna, et al. "Large scale, postlicensure, selective vaccination of Chilean infants with PRP-T conjugate vaccine: practicality and effectiveness in preventing invasive *Haemophilus influenzae* type b infections." *Pediatric Infectious Disease Journal* 15.3 (1996): 216-222.

**Table 2: Studies contributing to estimates of pathogen-specific meningitis case fatality ratio estimates stratified by child mortality setting**

| <b>a. <i>Streptococcus pneumoniae</i></b>                                                                                                                                                                                                                                                                                                                                                                                                                                                                                                                                                                                                                                                                                                                                                                                                                                                                                                                                                                                                                                                                                                                                                                                                                                                                                                                                                                                                                                                                                                                                                                                                                                                                                                                                                                                                                                                                                                                                                                                                                                                                                                                                                                                                                                                                                                                                                                                                                                                                                                                                                                                                                                                                                                                                                                                                                                                                                                                                                                                                                                                                                                                                                                                                                                                                                                                                                                                                                                                                                                                                                                                                                                                                                                                                                                                                                                                                                                                                                                                                                                                                                                                                                                                                                                                                                                                                                                                                                                                                                                  |
|--------------------------------------------------------------------------------------------------------------------------------------------------------------------------------------------------------------------------------------------------------------------------------------------------------------------------------------------------------------------------------------------------------------------------------------------------------------------------------------------------------------------------------------------------------------------------------------------------------------------------------------------------------------------------------------------------------------------------------------------------------------------------------------------------------------------------------------------------------------------------------------------------------------------------------------------------------------------------------------------------------------------------------------------------------------------------------------------------------------------------------------------------------------------------------------------------------------------------------------------------------------------------------------------------------------------------------------------------------------------------------------------------------------------------------------------------------------------------------------------------------------------------------------------------------------------------------------------------------------------------------------------------------------------------------------------------------------------------------------------------------------------------------------------------------------------------------------------------------------------------------------------------------------------------------------------------------------------------------------------------------------------------------------------------------------------------------------------------------------------------------------------------------------------------------------------------------------------------------------------------------------------------------------------------------------------------------------------------------------------------------------------------------------------------------------------------------------------------------------------------------------------------------------------------------------------------------------------------------------------------------------------------------------------------------------------------------------------------------------------------------------------------------------------------------------------------------------------------------------------------------------------------------------------------------------------------------------------------------------------------------------------------------------------------------------------------------------------------------------------------------------------------------------------------------------------------------------------------------------------------------------------------------------------------------------------------------------------------------------------------------------------------------------------------------------------------------------------------------------------------------------------------------------------------------------------------------------------------------------------------------------------------------------------------------------------------------------------------------------------------------------------------------------------------------------------------------------------------------------------------------------------------------------------------------------------------------------------------------------------------------------------------------------------------------------------------------------------------------------------------------------------------------------------------------------------------------------------------------------------------------------------------------------------------------------------------------------------------------------------------------------------------------------------------------------------------------------------------------------------------------------------------------------------|
| <b>Low child mortality settings (&lt;30 deaths per 1000 live births)</b>                                                                                                                                                                                                                                                                                                                                                                                                                                                                                                                                                                                                                                                                                                                                                                                                                                                                                                                                                                                                                                                                                                                                                                                                                                                                                                                                                                                                                                                                                                                                                                                                                                                                                                                                                                                                                                                                                                                                                                                                                                                                                                                                                                                                                                                                                                                                                                                                                                                                                                                                                                                                                                                                                                                                                                                                                                                                                                                                                                                                                                                                                                                                                                                                                                                                                                                                                                                                                                                                                                                                                                                                                                                                                                                                                                                                                                                                                                                                                                                                                                                                                                                                                                                                                                                                                                                                                                                                                                                                   |
| <ul style="list-style-type: none"> <li>• Al Awaidy, et al. "Epidemiology of invasive pneumococcal infection among hospitalized children aged less than 5 years in Oman." <i>Vaccine</i> 30 (2012): G7-G10.</li> <li>• Al Ayed, et al. "Retrospective review of invasive pediatric pneumococcal diseases in a military hospital in the southern region of Saudi Arabia." <i>Annals of Saudi Medicine</i> 31.5 (2011): 469.</li> <li>• Al Musawi, M., et al. "A retrospective epidemiological study of invasive pneumococcal infections in children aged 0-5 years in Bahrain from 1 January 1999 to 31 December 2003." <i>Vaccine</i>. 2012. 30 Suppl 6:G2-6.</li> <li>• Andrade, A. L., et al. "Population-based surveillance for invasive pneumococcal disease and pneumonia in infants and young children in Goiania, Brazil." <i>Vaccine</i>. 2012. 30:1901-9</li> <li>• Batuwanthudawe, R., et al. "Surveillance of invasive pneumococcal disease in Colombo, Sri Lanka." <i>Clinical Infectious Diseases</i> 48.Supplement 2 (2009): S136-S140.</li> <li>• Benavides, J. A., et al. "Population-based surveillance for invasive pneumococcal disease and pneumonia in infants and young children in Bogota, Colombia." <i>Vaccine</i>. 2012. 30:5886-92</li> <li>• Biaukula, V. L., et al. "Meningitis in children in Fiji: etiology, epidemiology, and neurological sequelae." <i>International Journal of Infectious Diseases</i> 16.4 (2012): e289-e295.</li> <li>• Camou, T., et al. "Invasive pneumococcal diseases in Uruguayan children: comparison between serotype distribution and conjugate vaccine formulations." <i>Vaccine</i> 21.17 (2003): 2093-2096.</li> <li>• Chan, Iris Mei-Ching, et al. "Invasive pneumococcal disease in Hong Kong children." <i>J Pediatr Respiratory Critic Care</i> 9.2 (2013): 4-8.</li> <li>• Chavez, P., et al. "Meningitis bacteriana aguda: experiencia de 10 años." <i>Rev Chil Infectol</i>;11(2):92-98, 1994</li> <li>• Davidson, M., et al. "The Epidemiology of Invasive Pneumococcal Disease in Alaska, 1986-1990 Ethnic Differences and Opportunities for Prevention." <i>Journal of Infectious Diseases</i> 170.2 (1994): 368-376.</li> <li>• Dickinson M., et al., "Las meningoencefalitis bacterianas en la población infantil cubana: 1998-2000." <i>Revista Cubana de Pediatría</i> 74.2 (2002): 106-114.</li> <li>• Fortnum, H. M. and A. C. Davis. "Epidemiology of bacterial meningitis." <i>Archives of Disease in Childhood</i> 68.6 (1993): 763-767.</li> <li>• Grzesiowski, P., et al. "Invasive pneumococcal disease in children up to 5 years of age in Poland." <i>Eur J Clin Microbiol Infect Dis</i>. 2008. 27:883-5</li> <li>• Hanna J. N., et al. "Bacterial meningitis in children under five years of age in Western Australia." <i>Medical Journal of Australia</i>. 1991.;155:3,160-164</li> <li>• Harboe, Z. B., et al. "Pneumococcal serotypes and mortality following invasive pneumococcal disease: a population-based cohort study." <i>PLoS Med</i> 6.5 (2009): e1000081.</li> <li>• Ishikawa, T., et al. "Epidemiology of bacterial meningitis in children: Aichi prefecture, Japan, 1984-1993." <i>Pediatric Neurology</i>. 1996 Apr;14(3):244-250</li> <li>• Jansen, A. G., et al. " Invasive pneumococcal disease in the Netherlands: Syndromes, outcome and potential vaccine benefits." <i>Vaccine</i>. 2009. 27:2394-401</li> <li>• Johnson, A. P., et al. "Morbidity and mortality of pneumococcal meningitis and serotypes of causative strains prior to introduction of the 7-valent conjugant pneumococcal vaccine in England." <i>Journal of Infection</i> 55.5 (2007): 394-399.</li> <li>• Lagos, R., et al., "Age- and serotype-specific pediatric invasive pneumococcal disease: insights from systematic surveillance in Santiago, Chile, 1994--2007." <i>J Infect Dis</i>. 2008. 198:1809-17</li> <li>• Lagos, Z. R., et al. "Epidemiología de las enfermedades invasoras causadas por <i>Streptococcus pneumoniae</i> en niños chilenos: proyecciones clínicas y de salud pública." <i>Revista chilena de infectología</i> 18 (2001): 15-21.</li> <li>• Lim, L. H., et al. "Childhood invasive pneumococcal disease: a hospital-based study from Malaysia." <i>J Paediatr Child Health</i>. 2007. 43:366-9</li> <li>• Lucey, J. M., et al. "Pneumococcal meningitis: clinical outcomes in a pre-vaccine era at a Dublin paediatric hospital, 1999–2007." <i>Irish Journal of Medical Science</i> 180.1 (2011): 47-50.</li> </ul> |

- McIntyre, P. B., et al., "A population based study of the impact of corticosteroid therapy and delayed diagnosis on the outcome of childhood pneumococcal meningitis." *Archives of Disease in Childhood*. 2005. 90:391-396
- Memish, Z. A., et al., "Epidemiology of invasive pneumococcal infection in children aged five years and under in Saudi Arabia: a five-year retrospective surveillance study." *Int J Infect Dis*. 2010. 14:e708-12
- Miller, E., et al. "Epidemiology of invasive and other pneumococcal disease in children in England and Wales 1996–1998." *Acta Paediatrica* 89.s435 (2000): 11-16.
- Namani, S. R. K., et al. "Causative pathogens of bacterial meningitis in children and their susceptibility to antibiotics." *The Internet J Infect Dis* 9 (2010): 1-6.
- Rendi-Wagner, P., et al. "Prospective surveillance of incidence, serotypes and antimicrobial susceptibility of invasive *Streptococcus pneumoniae* among hospitalized children in Austria." *Journal of Antimicrobial Chemotherapy*. 2004;53(5):826-831
- Ríos, A. M., et al. "Impacto de la resistencia a antimicrobianos y de serotipos de *Streptococcus pneumoniae* en la mortalidad de niños menores de 5 años con enfermedad invasora." (1999).
- Robinson, K. A., et al. "Epidemiology of invasive *Streptococcus pneumoniae* infections in the United States, 1995-1998: Opportunities for prevention in the conjugate vaccine era." *Jama* 285.13 (2001): 1729-1735.
- Trotman, H., et al. "Pneumococcal meningitis in Jamaican children." *West Indian Medical Journal* 58.6 (2009): 585-588.
- Von Kries, R., et al. "Prediction of the potential benefit of different pneumococcal conjugate vaccines on invasive pneumococcal disease in German children." *Pediatric Infectious Disease Journal* 21.11 (2002): 1017-1023.
- Voss, L., et al. "Invasive pneumococcal disease in a pediatric population, Auckland, New Zealand." *Pediatric Infectious Disease Journal*. 1994;13(10):873-878

#### Medium child mortality settings (30-<75 deaths per 1000 live births)

- Abucejo-Ladesma, E., et al. "Serious community-acquired paediatric infections in rural Asia (Bohol Island, Philippines): bacterial meningitis in children less than 5 years of age." *Scandinavian Journal of Infectious Diseases* 39.11-12 (2007): 983-989.
- Asturias, E. J., et al. "Meningitis and pneumonia in Guatemalan children: the importance of *Haemophilus influenzae* type b and *Streptococcus pneumoniae*." *Revista Panamericana de Salud Pública* 14.6 (2003): 377-384.
- Berkley, J. A., et al. "Bacteremia among children admitted to a rural hospital in Kenya." *New England Journal of Medicine* 352.1 (2005): 39-47.
- Capeding, Maria Rosario, et al. "Prospective surveillance study of invasive pneumococcal disease among urban children in the Philippines." *Pediatric Infectious Disease Journal* 32.10 (2013): e383-e389.
- Chhetri, U. D., et al. "Clinical profile of invasive pneumococcal disease in Patan Hospital, Nepal." *Kathmandu University Medical Journal* 9.1 (2012): 45-49.
- El Mdaghri, N., et al. "Epidemiological profile of invasive bacterial diseases in children in Casablanca, Morocco: antimicrobial susceptibilities and serotype distribution." *Eastern Mediterranean Health Journal* 18.11 (2012): 1097.
- Lovera, D., et al., "Risk factors for mortality in Paraguayan children with pneumococcal bacterial meningitis." *Tropical Medicine & International Health* 10.12 (2005): 1235-1241.
- Reis, J. N., et al. "Population-based survey of antimicrobial susceptibility and serotype distribution of *Streptococcus pneumoniae* from meningitis patients in Salvador, Brazil." *Journal of Clinical Microbiology* 40.1 (2002): 275-277.
- Shah, A. S., et al. "Invasive pneumococcal disease in Kanti Children's Hospital, Nepal, as observed by the South Asian Pneumococcal Alliance network." *Clinical Infectious Diseases* 48.Supplement 2 (2009): S123-S128.
- Williams, E. J., et al. "Hospital-based surveillance of invasive pneumococcal disease among young children in urban Nepal." *Clinical Infectious Diseases* 48. Supplement 2 (2009): S114-S122.

*High child mortality settings (75-<150 deaths per 1000 live births)*

- Al Khorasani, A., et al., "Bacterial profile and clinical outcome of childhood meningitis in rural Yemen: a 2-year hospital-based study." *Journal of Infection* 53.4 (2006): 228-234.
- Ba, O., et al. "Hospital surveillance of childhood bacterial meningitis in Senegal and the introduction of *Haemophilus influenzae* type b conjugate vaccine." *American Journal of Tropical Medicine and Hygiene* 83.6 (2010): 1330-1335.
- Iriso, R., et al. "Bacterial meningitis following introduction of Hib conjugate vaccine in northern Uganda." *Annals of Tropical Paediatrics* 28.3 (2008): 211-216.
- Khowaja, A. R., et al. "Mortality and neurodevelopmental outcomes of acute bacterial meningitis in children aged < 5 years in Pakistan." *The Journal of Pediatrics* 163.1 (2013): S86-S91.
- Kisakye, A., et al. "Surveillance for *Streptococcus pneumoniae* meningitis in children aged < 5 years: implications for immunization in Uganda." *Clinical Infectious Diseases* 48.Supplement 2 (2009): S153-S161.
- Menezes, Ana Paula de O., et al. "Serotype distribution and antimicrobial resistance of *Streptococcus pneumoniae* prior to introduction of the 10-valent pneumococcal conjugate vaccine in Brazil, 2000–2007." *Vaccine* 29.6 (2011): 1139-1144.
- Zaidi, A. K. M., et al. "Surveillance of pneumococcal meningitis among children in Sindh, southern Pakistan." *Clinical Infectious Diseases* 48.Supplement 2 (2009): S129-S135.

*Very high child mortality settings (>=150 deaths per 1000 live births)*

- Bercion, R., et al. "Acute bacterial meningitis at the 'Complexe Pédiatrique' of Bangui, Central African Republic." *Journal of Tropical Pediatrics* 54.2 (2008): 125-128.
- Bernard-Bonnin, A. C., et al. "Purulent meningitis in children in Yaounde: epidemiological and prognostic aspects." *Annales de la Societe Belge de Medecine Tropicale*. Vol. 65. No. 1. 1984.
- Falade, A. G., et al. "Invasive pneumococcal disease in children aged < 5 years admitted to 3 urban hospitals in Ibadan, Nigeria." *Clinical Infectious Diseases* 48.Supplement 2 (2009): S190-S196.
- Tall, F. R., et al. "*Haemophilus influenzae* meningitis in a hospital in Burkina-Faso." *Medecine et Maladies Infectieuses*. 1992;22(12):1173-1177
- Yaro, S., et al. "The epidemiology of *Haemophilus influenzae* type b meningitis in Burkina Faso." *Pediatric Infectious Disease Journal* 25.5 (2006): 415-419.

## **b. *Haemophilus influenzae* type b (Hib)**

### *Low child mortality settings (<30 deaths per 1000 live births)*

- Almuneef, M., et al. "Childhood bacterial meningitis in Saudi Arabia." *Journal of Infection* 36.2 (1998): 157-160.
- Anh, Dang D., et al. "*Haemophilus influenzae* type B meningitis among children in Hanoi, Vietnam: epidemiologic patterns and estimates of H. *Influenzae* type B disease burden." *American Journal of Tropical Medicine and Hygiene* 74.3 (2006): 509-515.
- Anh, D. D., et al. "Surveillance of pneumococcal-associated disease among hospitalized children in Khanh Hoa Province, Vietnam." *Clinical Infectious Diseases* 48.Supplement 2 (2009): S57-S64.
- Barton-Forbes, M. A., et al., "Epidemiology of *Haemophilus influenzae* invasive disease in Jamaica, 1990-1993." *West Indian Medical Journal* 49.3 (2000): 200-204.
- Batuwanthudawe, R., et al. "Surveillance of invasive pneumococcal disease in Colombo, Sri Lanka." *Clinical Infectious Diseases* 48.Suppl. 2 (2009): S136-S140.
- Batuwanthudawe, R., et al. "Incidence of childhood *Haemophilus influenzae* type b meningitis in Sri Lanka." *International Journal of Infectious Diseases* 14.5 (2010): e372-e376.
- Boehme, C., et al. "Three years of acute bacterial meningitis in the pediatric service at the Temuco Regional Hospital." *Revista Medica de Chile* 121.6 (1993): 633-638.
- Booy, R., et al. "Invasive *Haemophilus influenzae* type b disease in the Oxford region (1985-91)." *Archives of Disease in Childhood* 69.2 (1993): 225-228.
- Bower, C., et al. "Sequelae of *Haemophilus influenzae* type b meningitis in Aboriginal and non-Aboriginal children under 5 years of age." *Journal of Paediatrics and Child Health* 30.5 (1994): 393-397.
- Chavez, P., et al. "Meningitis bacteriana aguda: experiencia de 10 años." *Rev. Chil. Infectol* 11.2 (1994): 92-8.
- Chen, M. K., et al. "Prospective surveillance of children with invasive *Haemophilus influenzae* disease in Taiwan." *Journal of Microbiology, Immunology, and Infection* 32.4 (1999): 257-260.
- Dagan, R., et al. "Epidemiology of pediatric meningitis caused by *Haemophilus influenzae* type b, *Streptococcus pneumoniae*, and *Neisseria meningitidis* in Israel: a 3-year nationwide prospective study." *Journal of Infectious Diseases* 169.4 (1994): 912-916.
- De Jonghe, M. and G. Glaesener. "Type B *Haemophilus influenzae* infections. Experience at the pediatric hospital of Luxembourg." *Bulletin de la Société des Sciences Médicales du Grand-Duché de Luxembourg* 132.2 (1995): 17.
- Dickinson, M., et al., "Las meningoencefalitis bacterianas en la población infantil cubana: 1998-2000." *Revista Cubana de Pediatría* 74.2 (2002): 106-114.
- Fortnum, H. M. and A. C. Davis. "Epidemiology of bacterial meningitis." *Archives of disease in childhood* 68.6 (1993): 763-767.
- Gilbert, G. L., et al., "Clinical manifestations and outcome of *Haemophilus influenzae* type b disease." *Journal of Paediatrics and Child Health* 31.2 (1995): 99-104.
- Halfon-yaniv, I., et al., "Epidemiology of invasive *Haemophilus influenzae* type b infections in Bedouins and Jews in Southern Israel." *Pediatric Infectious Disease Journal* 9.5 (1990): 321-325.
- Ishikawa, T., et al. "Epidemiology of bacterial meningitis in children: Aichi Prefecture, Japan, 1984-1993." *Pediatric Neurology* 14.3 (1996): 244-250.
- Kamiya, Hitoshi, et al. "Childhood bacterial meningitis in Japan." *Pediatric Infectious Disease Journal* 17.9 (1998): S183-S185.
- Kristensen, K., et al. "Epidemiology of *Haemophilus influenzae* type b infections among children in Denmark in 1985 and 1986." *Acta Paediatrica* 79.6-7 (1990): 587-592.
- McIntyre, P. B., et al. "Invasive *Haemophilus influenzae* type b disease in Sydney children 1985-1987: a population-based study." *Medical Journal of Australia* 154.12 (1991): 832-837.
- McIntyre, P., et al. "The outcome of childhood *Haemophilus influenzae* meningitis. A population based study." *Medical Journal of Australia* 159.11-12 (1992): 766-772.
- Muangchana, C., et al. "Bacterial meningitis incidence in Thai children estimated by a rapid assessment tool." *Southeast Asian Journal of Tropical Medicine and Public Health* 40.3 (2009): 553.

- Namani, S., et al. "Causative pathogens of bacterial meningitis in children and their susceptibility to antibiotics." *Journal of Infectious Disease* 9 (2010): 1-6.
- Rauter, L., and I. Mutz. "Haemophilus influenzae meningitis 1983 to 1992--epidemiology and sequelae of the disease." *Wiener Klinische Wochenschrift* 106.7 (1993): 187-192.
- Reinert, P., et al. "Epidemiology of Haemophilus influenzae type b disease in France." *Vaccine* 11 (1993): S38-S42.
- Schoendorf, K. C., et al. "National trends in Haemophilus influenzae meningitis mortality and hospitalization among children, 1980 through 1991." *Pediatrics* 93.4 (1994): 663-668.
- Zaki, M., et al. "Childhood bacterial meningitis in Kuwait." *Journal of Tropical Medicine and Hygiene* 93.1 (1990): 7-11.

#### Medium child mortality settings (30-<75 deaths per 1000 live births)

- Abucejo-Ladesma, E., et al. "Serious community-acquired paediatric infections in rural Asia (Bohol Island, Philippines): bacterial meningitis in children less than 5 years of age." *Scandinavian Journal of Infectious Diseases* 39.11-12 (2007): 983-989.
- Ansari, I., et al. "Culture proven bacterial meningitis in children: agents, clinical profile and outcome." *Kathmandu Univ Med J.* 2011. 9:36-40
- Asturias, Edwin J., et al. "Meningitis and pneumonia in Guatemalan children: the importance of Haemophilus influenzae type b and Streptococcus pneumoniae." *Revista Panamericana de Salud Pública* 14.6 (2003): 377-384.
- Basualdo, W., et al. "Invasive Haemophilus influenzae type b infections in children in Paraguay." *Archives of Medical Research* 35.2 (2004): 126-133.
- El Mdaghri, N., et al. "Epidemiological profile of invasive bacterial diseases in children in Casablanca, Morocco: antimicrobial susceptibilities and serotype distribution." *Eastern Mediterranean Health Journal* 18.11 (2012): 1097.
- Hussey, G., et al. "Epidemiology of invasive Haemophilus influenzae infections in Cape Town, South Africa." *Annals of Tropical Paediatrics* 14.2 (1994): 97-103.
- Limcangco, M. R. T., et al. "Epidemiology of Haemophilus influenzae type b meningitis in Manila, Philippines, 1994 to 1996." *Pediatric Infectious Disease Journal* 19.1 (2000): 7-11.
- Luby, S. P., et al. "A low-cost approach to measure the burden of vaccine preventable diseases in urban areas." *Vaccine* 28.31 (2010): 4903-4912.
- Mendsaikhan, Jamsran, et al. "Childhood bacterial meningitis in Ulaanbaatar, Mongolia, 2002–2004." *Clinical Infectious Diseases* 48.Supplement 2 (2009): S141-S146.
- Minz, S., et al. "Incidence of Haemophilus influenzae type b meningitis in India." *Indian Journal of Medical Research* 128.1 (2008): 57.
- Ribeiro, G. S., et al. "Prevention of Haemophilus influenzae type b (Hib) meningitis and emergence of serotype replacement with type a strains after introduction of Hib immunization in Brazil." *Journal of Infectious Diseases* 187.1 (2003): 109-116.
- Saha, S. K., et al. "The increasing burden of disease in Bangladeshi children due to Haemophilus influenzae type b meningitis." *Annals of Tropical Paediatrics* 17.1 (1997): 5-8.
- Shah, A. S., et al. "Invasive pneumococcal disease in Kanti Children's Hospital, Nepal, as observed by the South Asian Pneumococcal Alliance network." *Clinical Infectious Diseases* 48.Supplement 2 (2009): S123-S128.
- Simões, L. L. P., et al. "Impact of Haemophilus influenzae b (Hib) vaccination on meningitis in Central Brazil." *Revista de Saude Publica* 38.5 (2004): 664-670.
- Torres, A., et al. "Infecciones invasivas por Haemophilus influenzae tipo b (Hib) en Tucumán-Argentina." *Arch. Argent. Pediatr* 93.4 (1995): 238-44.
- Weiss, D. P.L., et al. "Epidemiology of bacterial meningitis among children in Brazil, 1997-1998." *Revista de Saude Publica* 35.3 (2001): 249-255.



**High child mortality settings (75-<150 deaths per 1000 live births)**

- Adegbola, R. A., et al. "Haemophilus influenzae type b disease in the western region of The Gambia: background surveillance for a vaccine efficacy trial." *Annals of Tropical Paediatrics* 16.2 (1996): 103-111.
- Invasive Bacterial Infections Surveillance (IBIS) Group of the International Clinical Epidemiology Network. "Are Haemophilus influenzae infections a significant problem in India? A prospective study and review." *Clinical Infectious Diseases* 34.7 (2002): 949-957.
- Khowaja, A. R., et al. "Mortality and neurodevelopmental outcomes of acute bacterial meningitis in children aged < 5 years in Pakistan." *Journal of Pediatrics* 163.1 (2013): S86-S91.
- Koko, J., et al. "Bacterial meningitis in children in Libreville, Gabon. Epidemiologic, therapeutic and prognostic features." *Medecine et Maladies Infectieuses* 30.1 (2000): 50-56.
- Lewis, R. F., et al. "Action for child survival: elimination of Haemophilus influenzae type b meningitis in Uganda." *Bulletin of the World Health Organization* 86.4 (2008): 292-301.
- Zaidi, A. K. M., et al. "Surveillance of pneumococcal meningitis among children in Sindh, southern Pakistan." *Clinical Infectious Diseases* 48.Supplement 2 (2009): S129-S135.

**Very high child mortality settings (>=150 deaths per 1000 live births)**

- Bercion, R., et al. "Acute bacterial meningitis at the 'Complexe Pédiatrique' of Bangui, Central African Republic." *Journal of Tropical Pediatrics* 54.2 (2008): 125-128.
- Bernard-Bonnin, A. C., et al. "Purulent meningitis in children in Yaounde: epidemiological and prognostic aspects." *Annales de la Societe Belge de Medecine Tropicale*. Vol. 65. No. 1. 1984.
- Bijlmer, H. A., et al. "The epidemiology of Haemophilus influenzae meningitis in children under five years of age in The Gambia, West Africa." *Journal of Infectious Diseases* 161.6 (1990): 1210-1215.
- Campagne, G., et al. "Epidemiology of bacterial meningitis in Niamey, Niger, 1981-96." *Bulletin of the World Health Organization* 77.6 (1999): 499.
- Lagunju, I. A., et al. "Childhood bacterial meningitis in Ibadan, Nigeria--antibiotic sensitivity pattern of pathogens, prognostic indices and outcome." *African Journal of Medicine and Medical sciences* 37.2 (2008): 185-191.
- Molyneux, E., et al. "Acute bacterial meningitis in children admitted to the Queen Elizabeth Central Hospital, Blantyre, Malawi in 1996-97." *Tropical Medicine & International Health* 3.8 (1998): 610-618.
- Muhe, L., et al. "Pneumococcal and Haemophilus influenzae meningitis in a children's hospital in Ethiopia: serotypes and susceptibility patterns." *Tropical Medicine & International Health* 4.6 (1999): 421-427.
- Tall, F. R., et al. "Haemophilus influenzae meningitis in a hospital in Burkina-Faso." *Medecine et Maladies Infectieuses*. 1992;22(12):1173-1177
- Yaro, S., et al. "The epidemiology of Haemophilus influenzae type b meningitis in Burkina Faso." *Pediatric Infectious Disease Journal* 25.5 (2006): 415-419.

Table 3: Studies contributing to the distribution of meningitis cases by bacterial pathogen, stratified by geographic region

| Distribution of meningitis cases by etiology                                                                                                                                                                                                                                                                                                                                                                                                                                                                                                                                                                                                                                                                                                                                                                                                                                                                                                                                                                                                                                                                                                                                                                                                                                                                                                                                                                                                                                                                                                                                                                                                                                                                                                                                                                                                                                                                                                                                                                                                                                                                                                                                                                                                                                                                                                                                                                                                                                                                                                                                                                                                                                                                                                                                                                                                                                                                                                                                                                                                                                                                                                                                                                                                                                                                                                                                                                                                                                                                                                                                                                                                                                                                                                                                                                                                                                                                                                                                                                                                                                                                                                                                                                                                                                                                                                                                                                                                                                                                                      |
|-----------------------------------------------------------------------------------------------------------------------------------------------------------------------------------------------------------------------------------------------------------------------------------------------------------------------------------------------------------------------------------------------------------------------------------------------------------------------------------------------------------------------------------------------------------------------------------------------------------------------------------------------------------------------------------------------------------------------------------------------------------------------------------------------------------------------------------------------------------------------------------------------------------------------------------------------------------------------------------------------------------------------------------------------------------------------------------------------------------------------------------------------------------------------------------------------------------------------------------------------------------------------------------------------------------------------------------------------------------------------------------------------------------------------------------------------------------------------------------------------------------------------------------------------------------------------------------------------------------------------------------------------------------------------------------------------------------------------------------------------------------------------------------------------------------------------------------------------------------------------------------------------------------------------------------------------------------------------------------------------------------------------------------------------------------------------------------------------------------------------------------------------------------------------------------------------------------------------------------------------------------------------------------------------------------------------------------------------------------------------------------------------------------------------------------------------------------------------------------------------------------------------------------------------------------------------------------------------------------------------------------------------------------------------------------------------------------------------------------------------------------------------------------------------------------------------------------------------------------------------------------------------------------------------------------------------------------------------------------------------------------------------------------------------------------------------------------------------------------------------------------------------------------------------------------------------------------------------------------------------------------------------------------------------------------------------------------------------------------------------------------------------------------------------------------------------------------------------------------------------------------------------------------------------------------------------------------------------------------------------------------------------------------------------------------------------------------------------------------------------------------------------------------------------------------------------------------------------------------------------------------------------------------------------------------------------------------------------------------------------------------------------------------------------------------------------------------------------------------------------------------------------------------------------------------------------------------------------------------------------------------------------------------------------------------------------------------------------------------------------------------------------------------------------------------------------------------------------------------------------------------------------------------|
| <b>Africa</b>                                                                                                                                                                                                                                                                                                                                                                                                                                                                                                                                                                                                                                                                                                                                                                                                                                                                                                                                                                                                                                                                                                                                                                                                                                                                                                                                                                                                                                                                                                                                                                                                                                                                                                                                                                                                                                                                                                                                                                                                                                                                                                                                                                                                                                                                                                                                                                                                                                                                                                                                                                                                                                                                                                                                                                                                                                                                                                                                                                                                                                                                                                                                                                                                                                                                                                                                                                                                                                                                                                                                                                                                                                                                                                                                                                                                                                                                                                                                                                                                                                                                                                                                                                                                                                                                                                                                                                                                                                                                                                                     |
| <ul style="list-style-type: none"> <li>• Afifi, S., et al. "Laboratory-based surveillance of patients with bacterial meningitis in Egypt (1998–2004)." <i>European Journal of Clinical Microbiology &amp; Infectious Diseases</i> 26.5 (2007): 331-340.</li> <li>• Akpede, O., et al. "Childhood bacterial meningitis beyond the neonatal period in southern Nigeria: changes in organisms/antibiotic susceptibility." <i>East African Medical Journal</i> 71.1 (1994): 14-20.</li> <li>• Ba, O., et al. "Hospital surveillance of childhood bacterial meningitis in Senegal and the introduction of <i>Haemophilus influenzae</i> type b conjugate vaccine." <i>American Journal of Tropical Medicine and Hygiene</i> 83.6 (2010): 1330-1335.</li> <li>• Bercion, R., et al. "Acute bacterial meningitis at the 'Complexe Pédiatrique' of Bangui, Central African Republic." <i>Journal of Tropical Pediatrics</i> 54.2 (2008): 125-128.</li> <li>• Berkley, J. A., et al. "Indicators of acute bacterial meningitis in children at a rural Kenyan district hospital." <i>Pediatrics</i> 114.6 (2004): e713-e719.</li> <li>• Bernard-Bonnin, A. C., and T. Ekoe. "Purulent meningitis in children in Yaounde: epidemiological and prognostic aspects." <i>Annales de la Societe Belge de Medecine Tropicale</i>. Vol. 65. No. 1. 1984.</li> <li>• Camara, B., et al. "Purulent meningitis in a pediatric hospital (Dakar, Senegal)." <i>Medecine et Maladies Infectieuses</i> 33.8 (2003): 422-426.</li> <li>• Cisse, M. F., et al. "Bacterial meningitis in a pediatric hospital in a tropical zone." <i>Medecine Tropicale: Revue du Corps de Sante Colonial</i> 49.3 (1988): 265-269.</li> <li>• de Bary, J. B., et al. "Purulent meningitis at a semi-rural hospital in the forest area of the Ivory Coast." <i>Bulletin de la Société de Pathologie Exotique</i> (1990) 83.4 (1990): 460.</li> <li>• du Châtelet, I. P., et al. "Bacterial meningitis in Burkina Faso: surveillance using field-based polymerase chain reaction testing." <i>Clinical Infectious Diseases</i> 40.1 (2005): 17-25.</li> <li>• Emele, F. E. "Etiologic spectrum and pattern of antimicrobial drug susceptibility in bacterial meningitis in Sokoto, Nigeria." <i>Acta Paediatrica</i> 89.8 (2000): 942-946.</li> <li>• Falade, A. G., et al. "Invasive pneumococcal disease in children aged &lt; 5 years admitted to 3 urban hospitals in Ibadan, Nigeria." <i>Clinical Infectious Diseases</i> 48.Supplement 2 (2009): S190-S196.</li> <li>• Faye-Ketté, H., et al. "Community acquired bacterial meningitis in childhood: epidemiological trends in Abidjan, Cote d'Ivoire from 1995 to 2000." <i>Bulletin-Societe de Pathologie Exotique</i> 96.4 (2003): 313-316.</li> <li>• Fonkoua, M. C., et al., "Bacterial meningitis in Yaounde (Cameroon) in 1999-2000." <i>Bull Soc Pathol Exot.</i> 2001 Nov;94(4):d-303</li> <li>• Forsyth, H., et al. "Hearing loss in Malawian children after bacterial meningitis: incidence and risk factors." <i>Audiological Medicine</i> 2.2 (2004): 100-107.</li> <li>• Gedlu, E., et al., "Pyogenic meningitis in children in north-western Ethiopia." <i>Annals of Tropical Paediatrics</i> 15.3 (1995): 243-247.</li> <li>• Khalifa, A. B., et al. "Acquired bacterial meningitis in Monastir region, Tunisia (1999-2006): bacteriological aspects and susceptibility patterns." <i>Bulletin de la Societe de Pathologie Exotique</i> (1990) 104.1 (2011): 42-48.</li> <li>• Koko, J., et al. "Bacterial meningitis in children in Libreville, Gabon. Epidemiologic, therapeutic and prognostic features." <i>Medecine et Maladies Infectieuses</i> 30.1 (2000): 50-56.</li> <li>• Lewis, Rosamund F., et al. "Action for child survival: elimination of <i>Haemophilus influenzae</i> type b meningitis in Uganda." <i>Bulletin of the World Health Organization</i> 86.4 (2008): 292-301.</li> <li>• Lourd, M., et al. "The epidemiology of <i>Neisseria meningitidis</i> meningitis in Togo during 2003–2005." <i>Vaccine</i> 25 (2007): A47-A52.</li> <li>• Maalej, S. M., et al. "Bacteriology of community acquired meningitis in Sfax, Tunisia (1993-2001)." <i>Medecine et Maladies Infectieuses</i> 36.2 (2006): 105-110.</li> <li>• Madhi, S. A., et al. "Impact of human immunodeficiency virus type 1 infection on the epidemiology and outcome of bacterial meningitis in South African children." <i>International Journal of Infectious Diseases</i> 5.3 (2001): 119-125.</li> </ul> |

- Mbonda, E., et al. "Sequelles neurologiques des méningites: bactériennes chez le nourrisson et l'enfant a Yaounde." *Médecine d'Afrique Noire* 42.1 (1995): 39-45.
- Mirza, N. B., et al. "Bacterial meningitis in children admitted in hospitals within Nairobi." *East African Medical Journal* 75.2 (1998): 73-76.
- Mullan, P. C., et al. "Etiology of meningitis among patients admitted to a tertiary referral hospital in Botswana." *Pediatric Infectious Disease Journal* 30.7 (2011): 620-622.
- Naguib, H. F., et al., "Meningitis in El-Minia locality."
- O'dempsey, T. J. D., et al. "Importance of enteric bacteria as a cause of pneumonia, meningitis and septicemia among children in a rural community in The Gambia, West Africa." *Pediatric Infectious Disease Journal* 13.2 (1994): 122-127.
- Onipede, Anthony O., et al. "Invasive bacteria isolates from children with severe infections in a Nigerian hospital." *Journal of Infection in Developing Countries* 3.06 (2009): 429-436.
- Onyemelukwe, N. F. "*Haemophilus influenzae* meningitis in parts of eastern Nigeria." *East African Medical Journal* 71.2 (1994): 129-131.
- Orega, M., et al. "Les Méningites Purulentes De L'enfant A Abidjan (A Propos De 521 Cas)." *Médecine D'afrique Noire* 44.4 (1997): 213-9.
- Ouédraogo, S. M., et al. "Acute bacterial meningitis with soluble antigen detected by latex particle agglutination tests at the Sourô-Sanou University Hospital of Bobo-Dioulasso (Burkina Faso)." *Medecine et Sante Tropicales* 22.4 (2011): 412-416.
- Palmer, A., et al. "Brief report. Acute bacterial meningitis in The Gambia: a four-year review of paediatric hospital admissions." *Journal of Tropical Pediatrics* 45.1 (1999): 51-53.
- Roca, A., et al. "Surveillance of acute bacterial meningitis among children admitted to a district hospital in rural Mozambique." *Clinical Infectious Diseases* 48.Supplement 2 (2009): S172-S180.
- Salih, K. E. M. A., et al. "Pattern of bacterial meningitis in Sudanese children, Omdurman, Sudan." *African Journal of Microbiology Research* 4.24 (2010): 2670-2673.
- Salih, M. A. M., et al. "Endemic bacterial meningitis in Sudanese children: aetiology, clinical findings, treatment and short-term outcome." *Annals of Tropical Paediatrics* 10.2 (1990): 203-210.
- Shafie, W. A., et al. "Bacterial meningitis of children in Banha."
- Traore, Yves, et al. "Incidence, seasonality, age distribution, and mortality of pneumococcal meningitis in Burkina Faso and Togo." *Clinical Infectious Diseases* 48.Supplement 2 (2009): S181-S189.

#### Asia

- Abanamy, A., et al. "Childhood bacterial meningitis in Riyadh." *Annals of Saudi Medicine* 11.6 (1991): 628-632.
- Abomelha A. et al., "Childhood bacterial meningitis"
- Al Khorasani, A., et al., "Bacterial profile and clinical outcome of childhood meningitis in rural Yemen: a 2-year hospital-based study." *Journal of Infection* 53.4 (2006): 228-234.
- al-Jurayyan N. A., et al., "Childhood bacterial meningitis in Al-Baha province, Saudi Arabia"
- Al-Mazrou, Y. Y., et al. "*Haemophilus type B* meningitis in Saudi children under 5 years old." *Journal of Tropical Pediatrics* 50.3 (2004): 131-136.
- Almuneef, M., et al. "Childhood bacterial meningitis in Saudi Arabia." *Journal of Infection* 36.2 (1998): 157-160.
- Ansari, I., et al. "Culture proven bacterial meningitis in children: agents, clinical profile and outcome." *Kathmandu University Medical Journal* 9.1 (2012): 36-40.
- Azubuike J. C., et al., "Childhood bacterial meningitis in Tabuk, Saudi Arabia"
- Batuwanthudawe, R., et al. "Incidence of childhood *Haemophilus influenzae* type b meningitis in Sri Lanka." *International Journal of Infectious Diseases* 14.5 (2010): e372-e376.
- Batuwanthudawe, R., et al. "Surveillance of invasive pneumococcal disease in Colombo, Sri Lanka." *Clinical Infectious Diseases* 48.Supplement 2 (2009): S136-S140.
- Ceyhan, M., "A Prospective Study of Etiology of Childhood Acute Bacterial Meningitis, Turkey-Volume 14, Number 7—July 2008-Emerging Infectious Disease journal-CDC." (2008).

- Chinchankar, Nandita, et al. "Diagnosis and outcome of acute bacterial meningitis in early childhood." *Indian pediatrics* 39.10 (2002): 914-921.
- Choo, K. E., et al. "Pyogenic meningitis in hospitalized children in Kelantan, Malaysia." *Annals of Tropical Paediatrics* 10.1 (1990): 89-98.
- Dagan, R., et al. "Effectiveness of a nationwide infant immunization program against *Haemophilus influenzae* b." *Vaccine* 17.2 (1999): 134-141.
- Fujii, R., et al. "Trends in childhood bacterial meningitis in Japan (1979-1984).(Part 1). On the causative organisms." *Kansenshōgaku zasshi. Journal of the Japanese Association for Infectious Diseases* 60.6 (1986): 592.
- Gratten, M., et al. "The Bacteriology of Acute Pneumonia and Meningitis in Children in Papua New Guinea: Assumptions, Facts and Technical Strategies." *Papua New Guinea Medical Journal* 48.1/2 (2005): 73.
- Gurley, E. S., et al. "Etiologies of bacterial meningitis in Bangladesh: results from a hospital-based study." *American Journal of Tropical Medicine and Hygiene* 81.3 (2009): 475-483.
- Kim, Kyung-Hyo, et al. "The Causative Organisms of Bacterial Meningitis in Korean Children." *J Korean Med Sci* 13 (1998): 60-4.
- Kim, S. A., et al. "An expanded age range for meningococcal meningitis: molecular diagnostic evidence from population-based surveillance in Asia." *BMC Infectious Diseases* 12.1 (2012): 310.
- Lehmann, D., et al. "Aetiology and clinical signs of bacterial meningitis in children admitted to Goroka Base Hospital, Papua New Guinea, 1989–1992." *Annals of Tropical Paediatrics* 19.1 (1999): 21-32.
- Liu, C. C., et al. "Bacterial meningitis in infants and children in southern Taiwan: emphasis on *Haemophilus influenzae* type B infection." *Journal of the Formosan Medical Association Taiwan* 92.10 (1993): 884-888.
- Mahmood Y. A., et al., "Neonatal and childhood bacterial meningitis at Saddam general hospital in Tikrit." *Medical Journal of Tikrit University* (1997);3:39-45
- Mahmoud, R., et al. "Pattern of meningitis in Al-Ain medical district, United Arab Emirates—a decadal experience (1990–99)." *Journal of Infection* 44.1 (2002): 22-25.
- Mani, R., et al. "Bacteriological profile of community acquired acute bacterial meningitis: a ten-year retrospective study in a tertiary neurocare centre in South India." *Indian Journal of Medical Microbiology* 25.2 (2007): 108.
- Mao, Fei-Fei, et al. "Aetiological spectrum and antibiotic susceptibility pattern of bacterial meningitis in infants and children in Hangzhou, China." *Acta Paediatrica* 94.8 (2005): 1162-1163.
- Mendsaikhan, Jamsran, et al. "Childhood bacterial meningitis in Ulaanbaatar, Mongolia, 2002–2004." *Clinical Infectious Diseases* 48.Supplement 2 (2009): S141-S146.
- Moisi, J. C., et al. "Enhanced diagnosis of pneumococcal meningitis with use of the Binax NOW immunochromatographic test of *Streptococcus pneumoniae* antigen: a multisite study." *Clinical Infectious Diseases* 48.Supplement 2 (2009): S49-S56.
- Saha, S. K., et al. "The increasing burden of disease in Bangladeshi children due to *Haemophilus influenzae* type b meningitis." *Annals of Tropical Paediatrics* 17.1 (1997): 5-8.
- Sakata, H., et al. "A study of bacterial meningitis in Hokkaido between 1994 and 1998." *Kansenshogaku zasshi. The Journal of the Japanese Association for Infectious Diseases* 74.4 (2000): 339-344.
- Sung, R. Y. T., et al. "Meningitis in Hong Kong children, with special reference to the infrequency of haemophilus and meningococcal infection." *Journal of Paediatrics and Child Health* 33.4 (1997): 296-299.
- Sutinen, J., et al. "Etiology of central nervous system infections in the Philippines and the role of serum C-reactive protein in excluding acute bacterial meningitis." *International Journal of Infectious Diseases* 3.2 (1999): 88-93.
- Yang, Y., et al. "Acute bacterial meningitis in children in Hefei, China 1990-1992." *Chinese Medical Journal* 109.5 (1996): 385-388.
- Zaidi, Anita KM, et al. "Surveillance of pneumococcal meningitis among children in Sindh, southern Pakistan." *Clinical Infectious Diseases* 48.Supplement 2 (2009): S129-S135.

### Europe

- Christensen, A. C., et al. "Etiology of bacterial meningitis." *Ugeskr Laeger*. 1988 Mar 14;150(11):655-657
- Fortnum, H. M., et al. "Epidemiology of bacterial meningitis." *Archives of Disease in childhood* 68.6 (1993): 763-767.
- Kojouharova, M., et al. "Childhood bacterial meningitis in Bulgaria: a population-based retrospective study in six regions during 1992–1996." *International journal of infectious diseases* 7.2 (2003): 109-112.
- Kojouharova, M., et al. "Epidemiology of meningitis due to *Haemophilus influenzae* type b in children in Bulgaria: a prospective, population-based surveillance study." *Bulletin of the World Health Organization* 80.9 (2002): 690-695.
- Martínez, L. M., et al. "Bacterial meningitis. Clinical-epidemiological study. Review of 8 years (1988-1995)." *Anales Espanoles de Pediatria* 48.3 (1998): 277-282.
- Namani, S., et al. "Causative pathogens of bacterial meningitis in children and their susceptibility to antibiotics." *JInfects Dis* 9 (2010): 1-6.
- Pizzuti, R., et al. "*Haemophilus influenzae* type b meningitis in the city and district of Naples: a retrospective study on hospitalizations in the period 1987-1995." *Annali di igiene: medicina preventiva e di comunità* 10.3 (1998): 137.
- Stefanoff, P., et al. "Meningitis and encephalitis in Poland in 2000." *Przegląd Epidemiologiczny* 56.2 (2001): 265-273.
- Stefanoff, P., et al. "Meningitis and encephalitis in Poland in 2004." *Przegląd Epidemiologiczny* 60.3 (2005): 419-428.
- Stefanoff, P., et al. "Meningitis and encephalitis in Poland in 2005." *Przegląd Epidemiologiczny* 61.2 (2006): 225-234.
- Ticca, F., et al. "*Haemophilus influenzae* type b in meningitis: antibiotic resistance in pediatric patients." *Le Infezioni in Medicina: Rivista Periodica di Eziologia, Epidemiologia, Diagnostica, Clinica e Terapia delle Patologie Infettive* 5.2 (1997): 96-99.
- Zabicka, J., et al. "Meningitis and encephalitis in Poland in 1999." *Przegląd Epidemiologiczny* 55.1-2 (2000): 63-73.

### Latin America and the Caribbean

- Boehme, C., et al. "Three years of acute bacterial meningitis in the pediatric service at the Temuco Regional Hospital." *Revista Medica de Chile* 121.6 (1993): 633-638.
- Diaz, J. M., et al. "Trends of etiology of acute bacterial meningitis in Chilean children from 1989 to 1998. Impact of the anti-H influenzae type b vaccine." *Revista Medica de Chile* 129.7 (2001): 719-726.
- Dickinson Meneses, Félix Orlando, and Antonio Esteban Pérez Rodríguez. "Meningoencefalitis bacterianas en Cuba." *Revista Cubana de Higiene y Epidemiología* 39.2 (2001): 86-94.
- Dueger, Erica L., Edwin J. Asturias, and Neal A. Halsey. "Culture-and antigen-negative meningitis in Guatemalan children." *Revista Panamericana de Salud Pública* 24.4 (2008): 248-255.
- Gomez, E., et al. "Population-based surveillance for bacterial meningitis in the Dominican Republic: implications for control by vaccination." *Epidemiology and infection* 125.03 (2000): 549-554.
- Lucena, R., et al. "Características clínicas e laboratoriais de meningites bacterianas em crianças." (1996).
- Miranzi, S., et al. "*Haemophilus influenzae* type b: epidemiological situation in the State of Minas Gerais, Brazil, 1993-1997." *Cadernos de Saúde Pública* 19.5 (2003): 1267-1275.
- Nascimento-Carvalho CM, et al. "Etiology of bacterial meningitis in a cohort from Salvador, Bahia Arq Neuropsiquiatr." 1998 Mar;56(1):83-87
- Patiño, R. O., et al. "Meningitis bacteriana aguda en niños: estudio clínico y bacteriológico en el Hospital Infantil de Medellín." *Latreia* 1.2 (1988): 69-76.
- Ribeiro, G. S., et al. "*Haemophilus influenzae* meningitis 5 years after introduction of the *Haemophilus influenzae* type b conjugate vaccine in Brazil." *Vaccine* 25.22 (2007): 4420-4428.

### Northern America

- Coant, P. N., et al. "Blood culture results as determinants in the organism identification of bacterial meningitis." *Pediatric Emergency Care* 8.4 (1992): 200-205.
- Walling, A. D., et al. "The epidemiology of bacterial meningitis." *The Journal of the American Board of Family Practice* 4.5 (1991): 307-311.

| <b>Oceania</b>                                                                                                                                                                                                     |
|--------------------------------------------------------------------------------------------------------------------------------------------------------------------------------------------------------------------|
| <ul style="list-style-type: none"> <li>Hanna, J. N., et al. "Bacterial meningitis in children under five years of age in Western Australia." <i>Medical Journal of Australia</i> 155.3 (1991): 160-164.</li> </ul> |

**Table 4: Other indicators used for modeling Hib and pneumococcal disease burden**

| Values for                                            |                                                                                                                                                                                                                                 |
|-------------------------------------------------------|---------------------------------------------------------------------------------------------------------------------------------------------------------------------------------------------------------------------------------|
| Indicator                                             | Source                                                                                                                                                                                                                          |
| Population less than 5 years                          | United Nations Department of Economic and Social Affairs Population Division. World Population Prospects: The 2015 Revision, DVD Edition. New York: United Nations, 2015.                                                       |
| Child mortality rate                                  | United Nations Interagency Group for Child Mortality Estimation (IGME). 2015 Revision. United Nations, 2015.                                                                                                                    |
| Access to care                                        | Derived from Demographic and Health Surveys ( <a href="http://dhsprogram.com/data/">http://dhsprogram.com/data/</a> ) and Multiple Indicator Cluster Surveys ( <a href="https://data.unicef.org">https://data.unicef.org</a> )  |
| % of children <5 years infected with HIV              | Personal communication, UNAIDS <sup>1</sup>                                                                                                                                                                                     |
| % of deaths in children 1-59 months due to pneumonia  | Liu, Li, et al. "Global, regional, and national causes of under-5 mortality in 2000–15: an updated systematic analysis with implications for the Sustainable Development Goals." <i>The Lancet</i> 388.10063 (2016): 3027-3035. |
| % of deaths in children 1-59 months due to meningitis | Liu, Li, et al. "Global, regional, and national causes of under-5 mortality in 2000–15: an updated systematic analysis with implications for the Sustainable Development Goals." <i>The Lancet</i> 388.10063 (2017): 3027-3035. |
| Hib vaccine coverage in 2015                          | WHO and UNICEF estimates of national immunization coverage.                                                                                                                                                                     |
| Pneumococcal conjugate vaccine coverage in 2015       | WHO and UNICEF estimates of national immunization coverage.                                                                                                                                                                     |

<sup>1</sup> Contact [aidinfo@unaids.org](mailto:aidinfo@unaids.org) to request data.

**Webappendix 3:** Analysis of pneumonia impact studies to inform proportion of pneumonia mortality attributable to *Streptococcus pneumoniae* and *Haemophilus influenzae* type b (Hib)

To supplement the data from the efficacy trials, we identified PCV and Hib vaccine studies published between 1990 to 2014 with non-specific, clinical pneumonia outcomes (e.g., radiography-confirmed pneumonia, pneumonia hospitalizations). We aimed to make similar adjustments to those described before combining with adjusted efficacy and effectiveness estimates in a random effects meta-analysis. Because of herd effects, we assumed vaccine-type efficacy and vaccine coverage to be 100%. We excluded case-control studies without randomization or systematic vaccine distribution. Pre-post impact evaluations with less than 36 months of pre-vaccine introduction data, less than 24 months of post-vaccine introduction data, or unstable background rates of disease were also excluded.

Only one PCV impact study, and no Hib studies, met the inclusion criteria; the PCV study reported on pneumonia hospitalizations in young children in the United States.<sup>4</sup> After adjusting for serotype distribution and Hib vaccine use, the proportion of pneumonia hospitalizations attributable to pneumococcus (i.e., >50%) was assessed as being inconsistent with the other base case data. Advances in analytic methods for vaccine impact data from administrative databases suggest that overestimates of impact may occur.<sup>5</sup> As such, we did not include it in the meta-analysis with other PCV efficacy or effectiveness data. We plan to revisit the opportunity to include these and other similar data in the analysis.

Figure 2: Flow Diagram of PCV Impact studies for Use in Determining the Proportion of Pneumonia Deaths Attributable to Pneumococcus

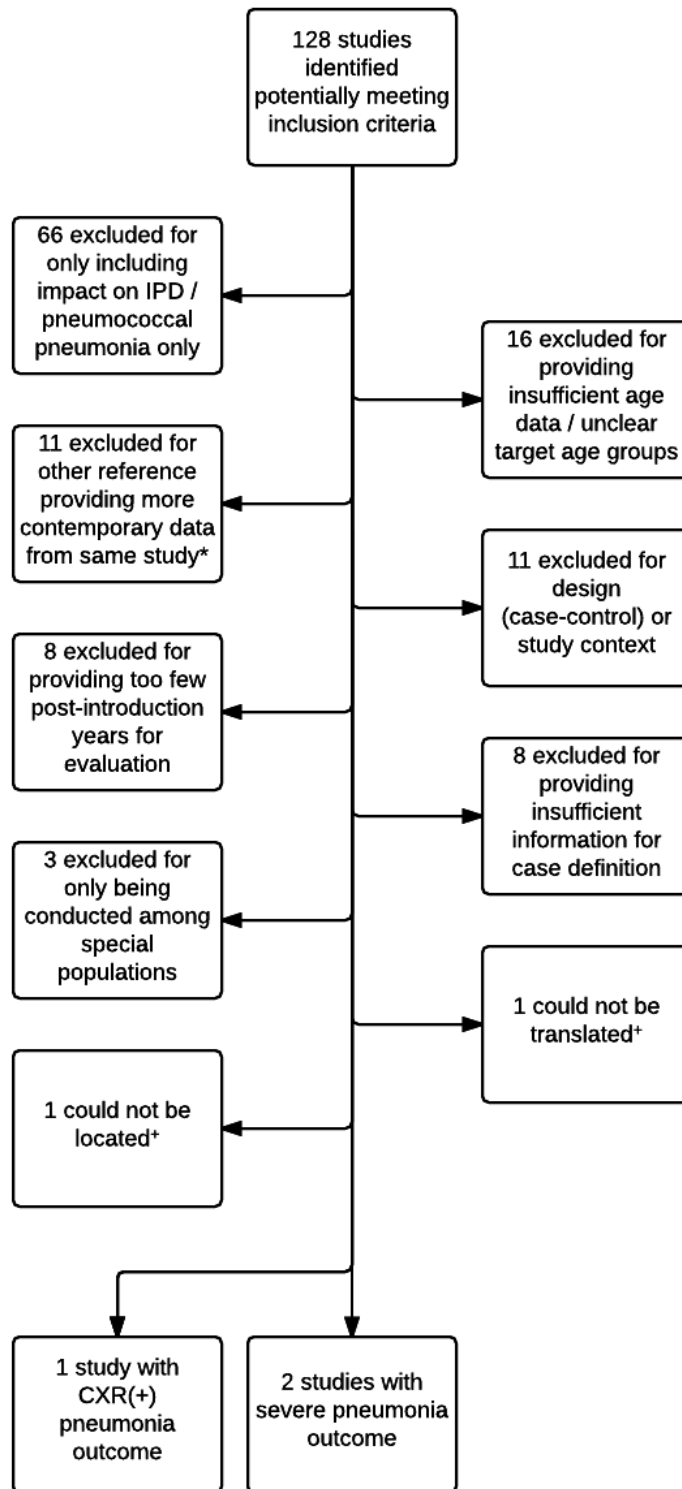



**Webappendix 4:** Proportion of pneumonia morbidity and mortality attributable to *Streptococcus pneumoniae* and *Haemophilus influenzae* type b

Figure 3: Proportion of radiography-confirmed pneumonia attributable to pneumococcus

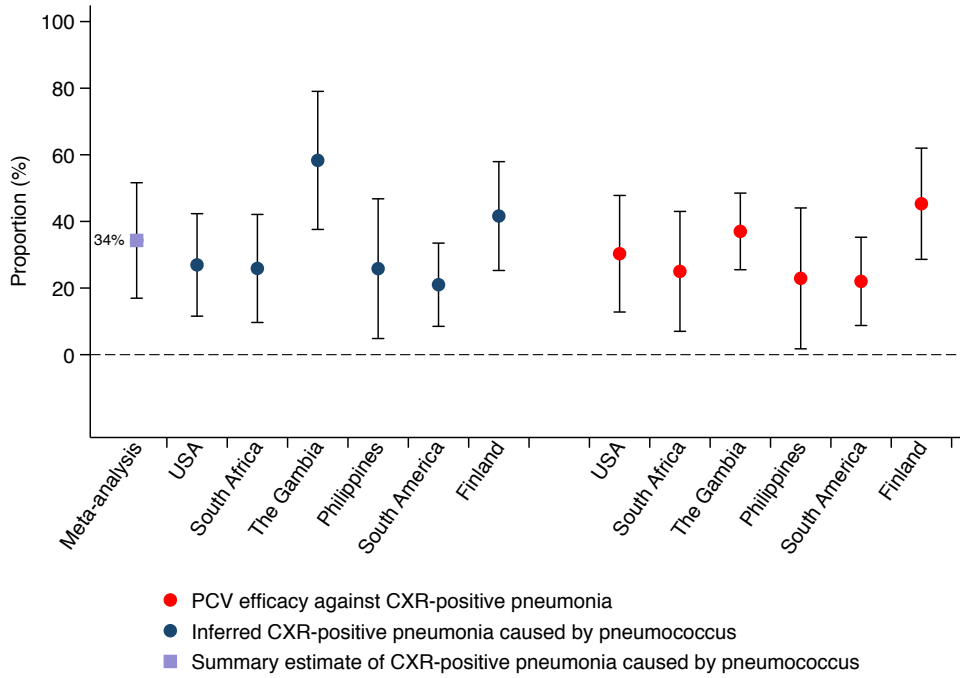

Figure 4: Proportion of severe pneumonia attributable to pneumococcus

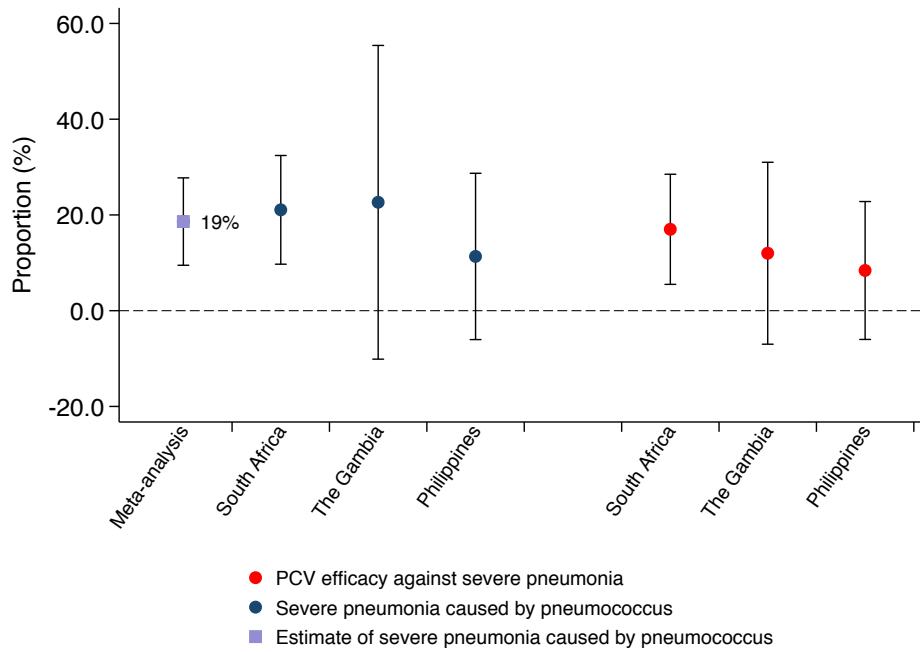

Figure 5: Proportion of clinical pneumonia attributable to pneumococcus

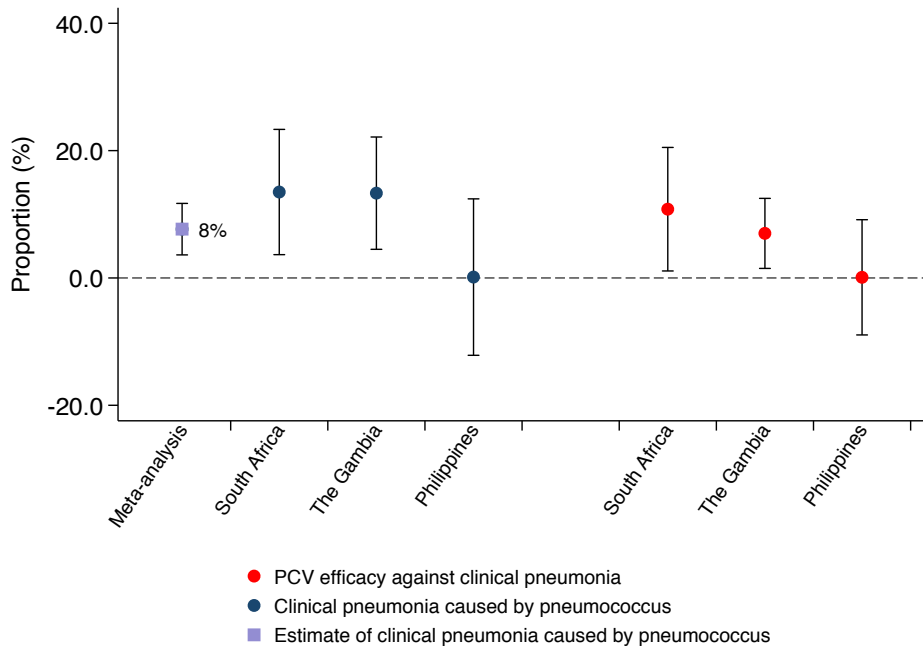

Figure 6: Proportion of radiography-confirmed pneumonia attributable to Hib

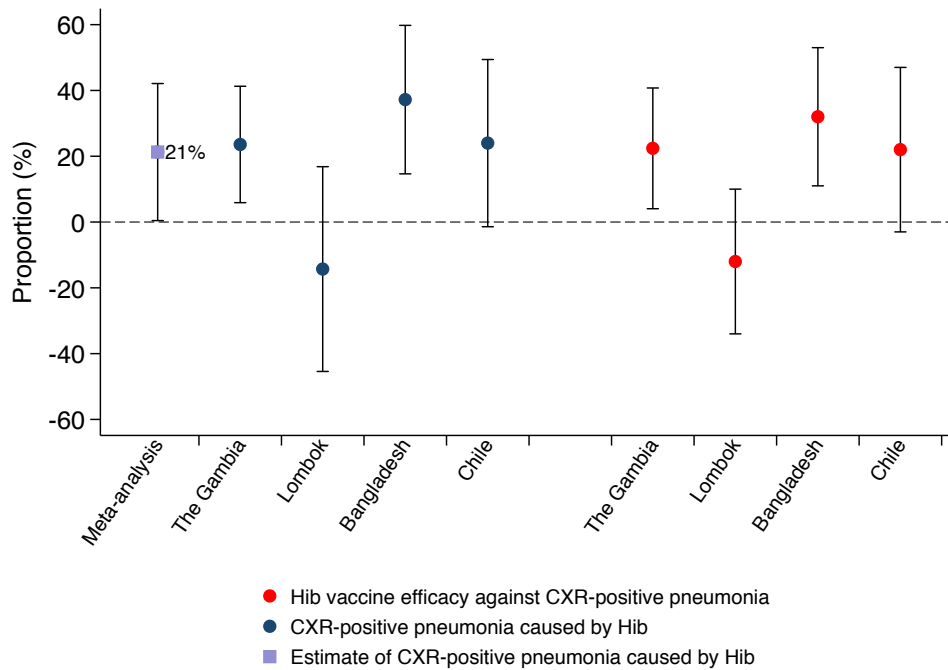

Figure 7: Proportion of severe pneumonia attributable to Hib

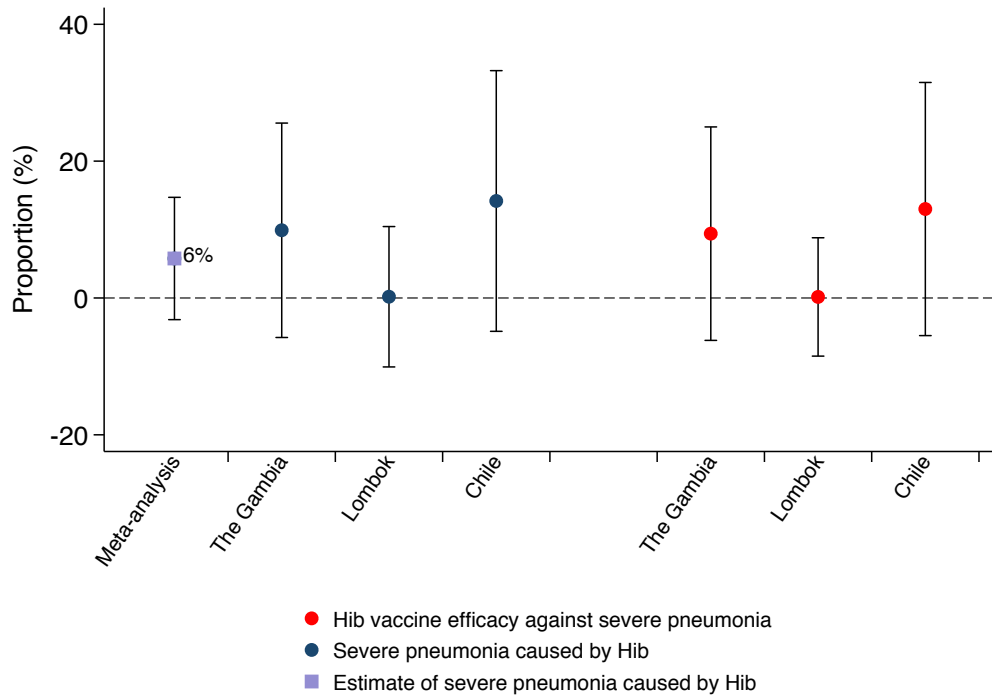

Figure 8: Proportion of clinical pneumonia attributable to Hib

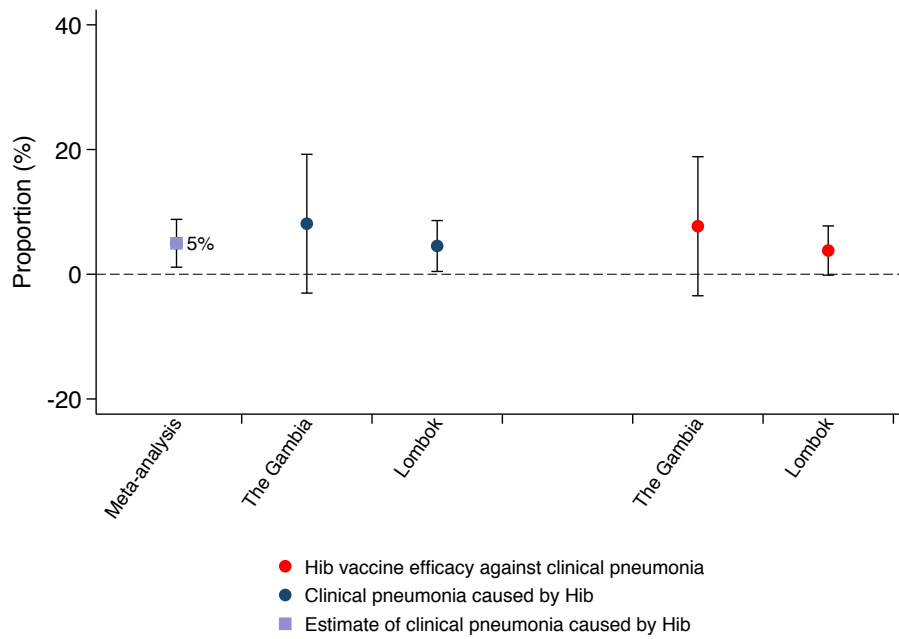

**Webappendix 5:** Details of sensitivity analysis on proportion of pneumonia deaths attributable to *Streptococcus pneumoniae*

The use of observed efficacy against vaccine-type invasive disease as a proxy for efficacy against vaccine-type pneumonia was a major point of consideration in our updated mortality estimates for pneumococcus. Vaccine-type efficacy against invasive disease almost certainly overestimates vaccine efficacy against vaccine-type pneumonia. As a result, our estimates likely underestimate the burden of pneumococcal pneumonia deaths. We considered three options.

1. A summary measure using observed efficacy against vaccine-type invasive disease to account for incomplete efficacy against vaccine-type pneumonia (i.e., the current base case).
2. A summary measure using observed efficacy against vaccine-type invasive disease, adjusted by the ratio of efficacy against vaccine-type community-acquired pneumococcal pneumonia to efficacy against vaccine-type invasive disease both from a study in elderly Dutch adults that utilizes the urine antigen test, to account for incomplete efficacy against vaccine-type pneumonia
3. A summary estimate using observed efficacy against vaccine-type nasopharyngeal (NP) carriage or vaccine-type acute otitis media (AOM) to account for incomplete efficacy against VT pneumonia

The results of the three adjustments are included in Table 5 below.

*Table 5: Estimates of radiography-confirmed pneumonia attributable to pneumococcus in the absence of vaccination using different adjustments to account for incomplete efficacy against VT pneumococcal pneumonia in the absence of vaccination with PCV or Hib vaccine*

| Approach                                                                                                                                                                                                           | Parameters used in adjustment                                                                                                                                         | Adjustment factor for IPD efficacy | Summary estimate |
|--------------------------------------------------------------------------------------------------------------------------------------------------------------------------------------------------------------------|-----------------------------------------------------------------------------------------------------------------------------------------------------------------------|------------------------------------|------------------|
| 1. Observed efficacy against VT invasive disease to account for incomplete efficacy against VT pneumonia                                                                                                           | <ul style="list-style-type: none"> <li>• N/A</li> </ul>                                                                                                               | 1.000                              | 34% (17 – 52%)   |
| 2. Observed efficacy against VT invasive disease, adjusted by ratio of efficacy against VT pneumococcal pneumonia to efficacy against VT invasive disease, to account for incomplete efficacy against VT pneumonia | <ul style="list-style-type: none"> <li>• 45.6% (21.8-62.5%) for VT pneumococcal pneumonia<sup>6</sup></li> <li>• 75.0% (41.4-90.8%) for VT IPD<sup>6</sup></li> </ul> | 0.608                              | 66% (-7 – 100%)  |
| 3. Observed efficacy against VT invasive disease, adjusted by ratio of VT acute otitis media (AOM) efficacy to VT invasive disease efficacy, to account for incomplete efficacy against VT pneumonia               | <ul style="list-style-type: none"> <li>• 57% (50-63%) for VT AOM<sup>7</sup></li> <li>• 80% (58-90%) for VT IPD<sup>1</sup></li> </ul>                                | 0.713                              | 51% (15 – 87%)   |
| 4. Observed efficacy against VT invasive disease, adjusted by ratio of VT nasopharyngeal (NP) carriage efficacy to VT invasive disease efficacy, to account for incomplete efficacy against VT pneumonia           | <ul style="list-style-type: none"> <li>• 57% (50-65%) for VT NP<sup>8</sup></li> <li>• 80% (58-90%) for VT IPD<sup>1</sup></li> </ul>                                 | 0.7125                             | 51% (14 – 89%)   |

PCV impact studies can provide a unique insight into which adjustment might be more appropriate. This is because through assumed herd effects, there is no need to adjust for imperfect vaccine efficacy—the source of substantial uncertainty in the current estimates. We conducted a review of PCV impact studies with non-specific, clinical pneumonia outcomes in children less than 5 years published between 2000 and 2016. We identified 64 studies with relevant outcomes. Of these, we evaluated those with more than 2 years of post-vaccine introduction data. We used the most contemporary estimates when publications overlapped in time and geography. Results were stratified by age and case definition.

Assuming complete elimination of Hib and complete vaccine-type efficacy stemming from elimination of carried vaccine serotypes, adjustments for serotype distribution were applied to the vaccine impact data. For the distribution of serotypes causing disease, we used estimates of serotypes causing invasive disease. To provide an absolute upper limit, we also adjusted by the distribution of serotypes colonizing the NP from an unpublished meta-analysis. Limiting the analysis to impact studies with all-cause pneumonia hospitalization endpoints in children 0-23 months (i.e., an age group similar to the efficacy and effectiveness studies), the median estimate of pneumonia hospitalizations caused by pneumococcus in the absence of immunization is 38% (range: 13-52%) using the adjustment by the distribution of serotypes causing IPD. The upper limit of pneumonia hospitalizations caused by pneumococcus in the absence of immunization, using an NP adjustment, is 49% (range: 21-62%).

Figure 9: Impact of PCV on all-cause pneumonia hospitalizations stratified by age-group

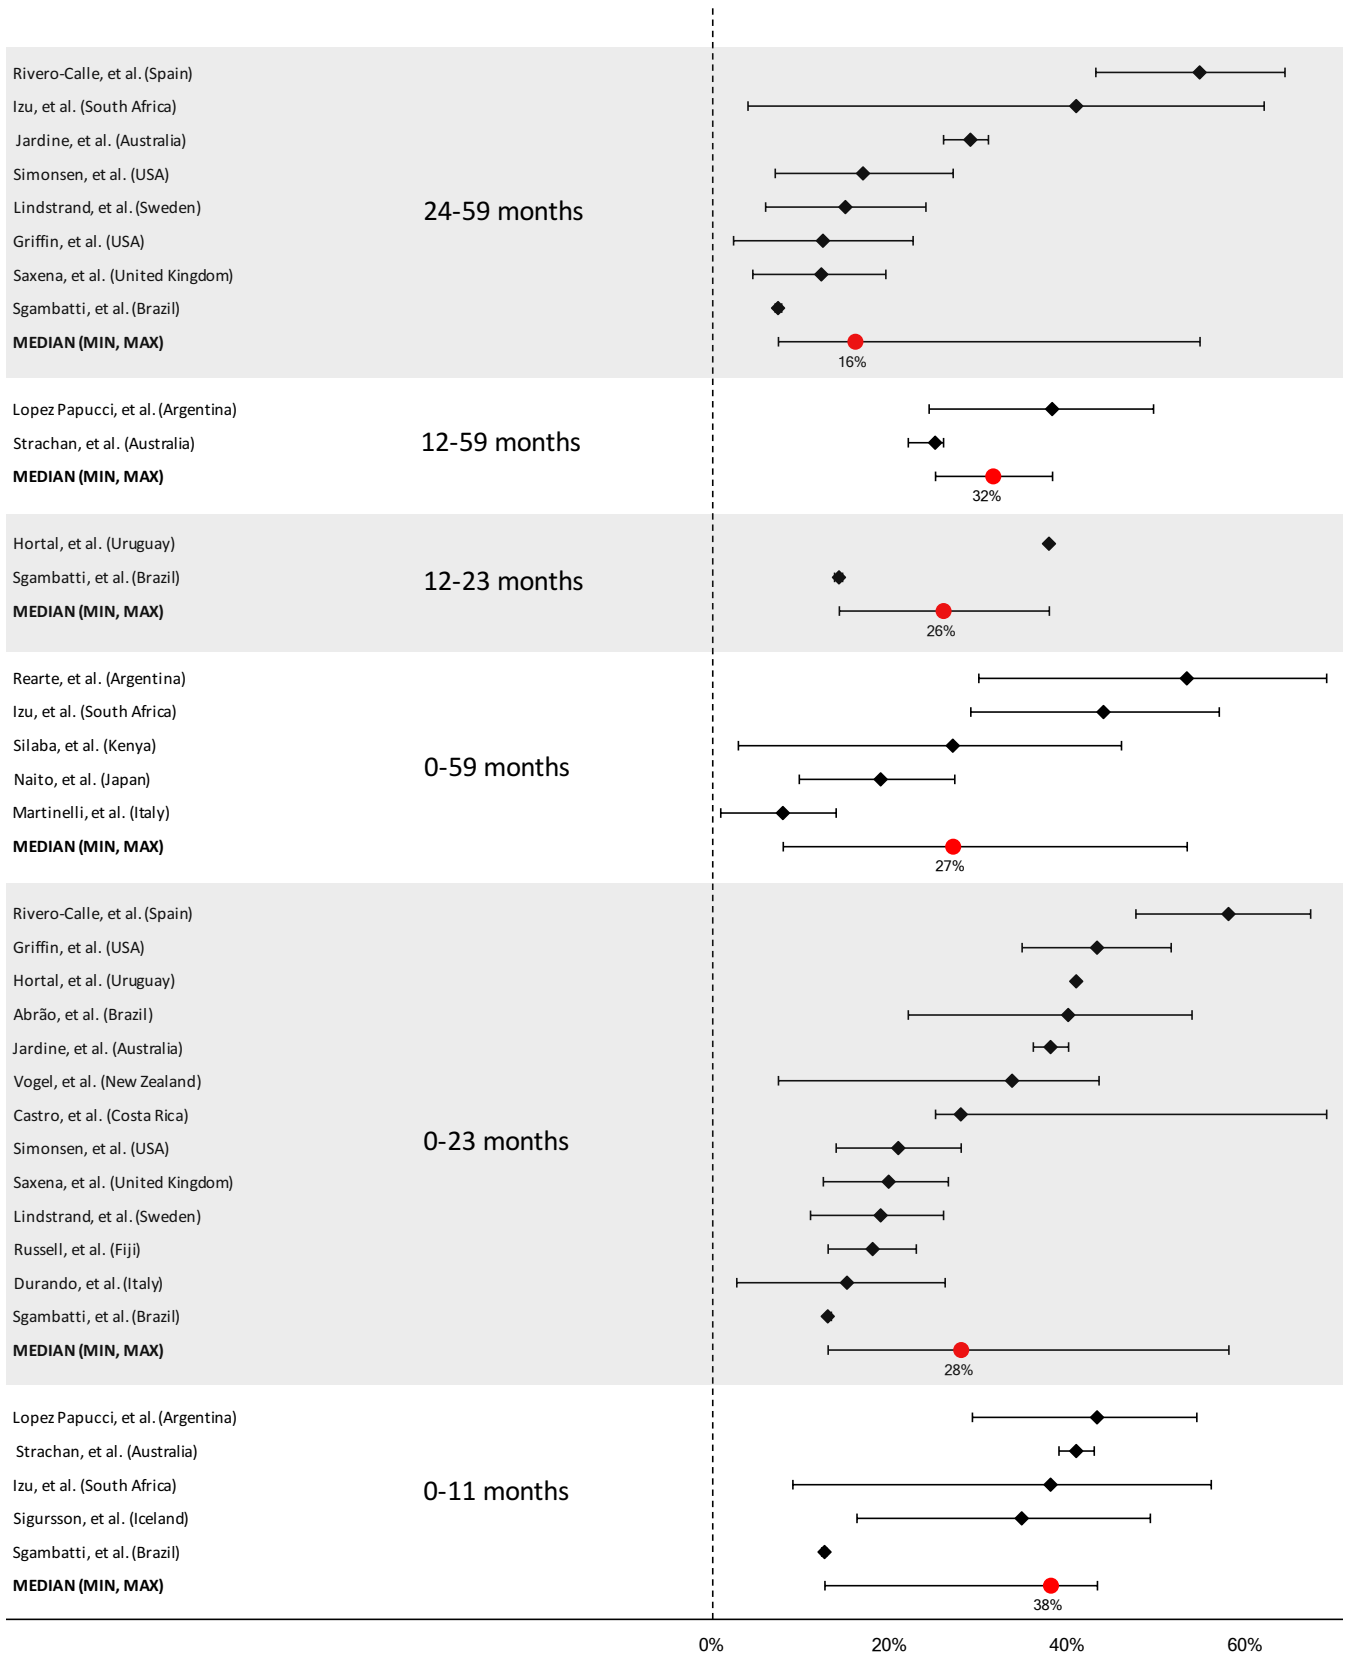

**Webappendix 6:** Methods used for stratifying pneumonia and meningitis deaths by age (i.e., 1-23 months and 24-59 months) for estimating the burden of Hib disease

We stratified all-cause pneumonia and meningitis deaths by age group (i.e., 1-23 months and 24-59 months) using estimates of total child deaths from IGME for each country.<sup>9</sup> IGME estimates are already stratified by age (i.e., <1 month, <12 months, <59 months). We assumed that half of all deaths in children 12-59 months occurred in children 12-23 months of age. From this estimate, we used the ratio of all deaths in children 1-23 months to all deaths in children 24-59 months and assumed the same distribution for pneumonia and meningitis deaths. To estimate Hib deaths due to pneumonia and meningitis, we applied estimates of the proportion of pneumonia and meningitis due to Hib to pneumonia and meningitis deaths in children 1-23 months.

**Webappendix 7:** Methods used to estimate the proportion of meningitis deaths attributable to each pathogen.

No observational studies were identified that reported on the proportion of meningitis deaths due to each pathogen. We therefore used data from studies reporting on the distribution of meningitis cases and adjusted these estimates by the relative pathogen-specific meningitis CFR to calculate the proportion of meningitis deaths due to pneumococcus and Hib. We constrained the total contribution of the most common causes of bacterial meningitis (i.e., pneumococcus, Hib, and *Neisseria meningitidis*) to all-cause meningitis cases and deaths to 83% based on an analysis of studies reporting on multiple meningitis etiologies using diagnostic techniques with equivalent sensitivity for all pathogens. To derive the proportion of all-cause meningitis deaths attributable to pathogen  $x$ , we used the following equation

$$\% \text{ Meningitis deaths}_x = \frac{\text{Meningitis CFR}_x \times \% \text{ Meningitis cases}_x}{\sum_i (\text{Meningitis CFR}_i \times \% \text{ Meningitis cases}_i)}$$

where  $\text{Meningitis CFR}_x$  is the case fatality ratio (CFR) for pathogen  $x$ ,  $\% \text{ Meningitis cases}_x$  is the proportion of meningitis cases attributable to pathogen  $x$ , and the denominator on the right-hand side of the equation is the sum of the products for each pathogen.



**Webappendix 8:** Equation used to account for increased risk of Hib and pneumococcal disease in children infected with HIV

We used the following equation to prepare annual mortality and morbidity estimates due to each syndrome (i.e., pneumonia, meningitis, and NPNM) in HIV-infected children for each pathogen

$$HIV^+ deaths_{pathogen,syndrome} = \frac{HIV \% \times Population_{1-59 mos.} \times HIV^- deaths_{pathogen,syndrome} \times ID Relative Risk_{pathogen}}{(1 - HIV \%) \times Population_{1-59 mos.}}$$

Where *HIV %* represents the proportion of children infected with HIV and not on HAART, *Population<sub>1-59 mos.</sub>* is the total population of children 1-59 months, *HIV<sup>-</sup> deaths<sub>pathogen,syndrome</sub>* is the estimated number of deaths due to the pathogen by syndrome, and *ID Relative Risk<sub>pathogen</sub>* is the relative risk of invasive disease for pneumococcus (40.96) or Hib (7.39) in children infected with HIV.

## **Webappendix 9: External review members**

### World Health Organization (WHO) Immunization and Vaccines related Implementation Research Advisory Committee (IVIR-AC) members

- Mary Amuyunzu-Nyamongo, Executive Director and co-founder, African Institute for Health and Development (AIHD), Nairobi, Kenya
- Philippe Beutels, Associate Professor, Health Economics, Health Economics and Modeling Infectious Diseases Unit, University of Antwerp, Belgium
- Robert F. Breiman (Chair), Director, Emory Global Health Institute, Emory University, Atlanta, USA
- Marc Brisson, Associate Professor, Department of social and preventive medicine, Faculty of Medicine, Laval University, Canada
- Donald Burke, Dean of the Graduate School of Public Health and UPMC Jonas Salk Chair of Global Health, University of Pittsburgh, USA
- Rachel Feilden, FBA Health System Analysts, Bath Somerset, UK
- Brad Gessner, Scientific Director, Association pour la Médecine Préventive (AMP), Paris, France
- Gagandeep Kang, Head, Department of Gastrointestinal Sciences, Christian Medical College, Vellore, India
- Peter McIntyre, Director, National Centre for Immunization Research & Surveillance, University of Sydney, Australia
- Wilfred Ndifon, Chair, Career Development Research, African Institute for Mathematical, Sciences, Cape Town, South Africa
- Yot Teerawattananon, Founding Leader of Health Intervention and Technology Assessment Program & Senior Researcher Scholar of Thailand's Research Fund, Ministry of Public Health, Thailand
- Mitchell Weiss, Professor & Head, Swiss Tropical & Public Health Institute, Basel, Switzerland

### External Expert Review Committee

- Philippe Beutels, Associate Professor, Health Economics, Health Economics and Modeling Infectious Diseases Unit, University of Antwerp, Belgium
- Robert F. Breiman, Director, Emory Global Health Institute, Emory University, Atlanta, USA
- Claire Broome, Consultant, USA
- Harry Campbell, Professor, Usher Institute of Population Health Sciences and Informatics, Medical School, The University of Edinburgh, Scotland, UK
- Thomas Cherian, Coordinator, Expanded Programme on Immunization, Department of Immunization, Vaccines and Biologicals, World Health Organization, Geneva, Switzerland
- Brad Gessner, Scientific Director, Association pour la Médecine Préventive (AMP), Paris, France

- Gagandeep Kang, Head, Department of Gastrointestinal Sciences, Christian Medical College, Vellore, India
- Keith Klugman, Director, Pneumonia, Bill & Melinda Gates Foundation, Seattle, USA
- Shabir Madhi, Executive Director, National Institute for Communicable Diseases, National Health Laboratory Service, Johannesburg, South Africa
- Kim Mulholland, Professor, Murdoch Childrens Research Institute, Victoria, Australia
- Samir Saha, Senior Consultant, Department of Microbiology, Dhaka Shishu Hospital, Dhaka, Bangladesh
- Cynthia Whitney, Chief of the Respiratory Diseases Branch, National Center for Immunization and Respiratory Diseases, Centers for Disease Control and Prevention, Atlanta, USA

## Webappendix 10: GATHER checklist

Table 6: GATHER Checklist

| GATHER checklist item                                                                                                                                                                                                                                                                                                                                | Section(s) or sources providing information                                                                                                                                                                                  |
|------------------------------------------------------------------------------------------------------------------------------------------------------------------------------------------------------------------------------------------------------------------------------------------------------------------------------------------------------|------------------------------------------------------------------------------------------------------------------------------------------------------------------------------------------------------------------------------|
| <b>Objectives and funding</b>                                                                                                                                                                                                                                                                                                                        |                                                                                                                                                                                                                              |
| 1. Define the indicators, populations, and time periods for which estimates were made.                                                                                                                                                                                                                                                               | Indicators, populations, and time periods provided in methods.                                                                                                                                                               |
| 2. List the funding sources for the work.                                                                                                                                                                                                                                                                                                            | Funding source provided in summary.                                                                                                                                                                                          |
| <b>Data inputs</b>                                                                                                                                                                                                                                                                                                                                   |                                                                                                                                                                                                                              |
| 3. Describe how the data were identified and how the data were accessed.                                                                                                                                                                                                                                                                             | Data identification and collection approaches provided in “data sources” section of methods and webappendix.                                                                                                                 |
| 4. Specify the inclusion and exclusion criteria. Identify all ad-hoc exclusions.                                                                                                                                                                                                                                                                     | Inclusion and exclusion criteria provided in webappendix and previous publications. <sup>2,10</sup>                                                                                                                          |
| 5. Provide information about all included data sources and their main characteristics. For each data source used, report reference information or contact name/institution, population represented, data collection method, years of data collection, sex and age range, diagnostic criteria or measurement method, and sample size, as relevant.    | Data sources and characteristics provided in online open access database.                                                                                                                                                    |
| 6. Identify and describe any categories of input data that have potentially important biases (e.g., based on characteristics listed in item 5).                                                                                                                                                                                                      | Potentially important biases of input data provided in discussion and webappendix.                                                                                                                                           |
| 7. Describe and give sources for any other data inputs.                                                                                                                                                                                                                                                                                              | Other sources of data described in methods and webappendix and provided in online open access database when appropriate.                                                                                                     |
| 8. Provide all data inputs in a file format from which data can be efficiently extracted, including all relevant meta-data listed in item 5. For any data inputs that cannot be shared because of ethical or legal reasons, such as third-party ownership, provide a contact name or the name of the institution that retains the right to the data. | Data inputs available in Excel spreadsheet in online open access database when appropriate. Data inputs that cannot be shared are described in webappendix with institutional contacts for potentially obtaining these data. |
| <b>Data analysis</b>                                                                                                                                                                                                                                                                                                                                 |                                                                                                                                                                                                                              |
| 9. Provide a conceptual overview of the data analysis method. A diagram may be helpful.                                                                                                                                                                                                                                                              | Conceptual model provided in Figure 1 of manuscript.                                                                                                                                                                         |
| 10. Provide a detailed description of all steps of the analysis, including mathematical formulae. This description should cover, as relevant, data cleaning, data pre-processing, data adjustments and weighting of data sources, and mathematical or statistical models.                                                                            | Detailed description of analysis provided in methods, appendix, and previous publications. <sup>10-12</sup>                                                                                                                  |
| 11. Describe how candidate models were evaluated and how the final models were selected.                                                                                                                                                                                                                                                             | Discussion of candidate model considerations provided in methods and webappendix.                                                                                                                                            |
| 12. Provide the results of an evaluation of model performance, if done, as well as the results of any relevant sensitivity analysis.                                                                                                                                                                                                                 | Results of model performance at country-level provided in results and webappendix.                                                                                                                                           |
| 13. Describe methods of calculating uncertainty of the estimates. State which sources of uncertainty were, and were not, accounted for in the uncertainty analysis.                                                                                                                                                                                  | Uncertainty methods and sources provided in methods.                                                                                                                                                                         |
| 14. State how analytic or statistical source code used to generate estimates can be accessed.                                                                                                                                                                                                                                                        | Access to source code provided in online open access database.                                                                                                                                                               |
| <b>Results and discussion</b>                                                                                                                                                                                                                                                                                                                        |                                                                                                                                                                                                                              |
| 15. Provide published estimates in a file format from which data can be efficiently extracted.                                                                                                                                                                                                                                                       | Results in Excel spreadsheet provided in online open access database.                                                                                                                                                        |
| 16. Report a quantitative measure of the uncertainty of the estimates.                                                                                                                                                                                                                                                                               | Uncertainty intervals provided with all results in manuscript, webappendix, and online open access database.                                                                                                                 |
| 17. Interpret results in light of existing evidence. If updating a previous set of estimates, describe the reasons for changes in estimates.                                                                                                                                                                                                         | Discussion of results relevant to existing research provided in research in context, results, and discussion.                                                                                                                |
| 18. Discuss limitations of the estimates. Include a discussion of any modelling assumptions or data limitations that affect interpretation of the estimates.                                                                                                                                                                                         | Limitations of data and models provided in discussion.                                                                                                                                                                       |

Table 7: *Streptococcus pneumoniae* mortality by syndrome, country, and year

| Year | Country             | Pneumonia deaths           |                                 |                                    |                                         | Meningitis deaths          |                                 |                                    |                                         | NPNM deaths          |                           |                              |                                   |
|------|---------------------|----------------------------|---------------------------------|------------------------------------|-----------------------------------------|----------------------------|---------------------------------|------------------------------------|-----------------------------------------|----------------------|---------------------------|------------------------------|-----------------------------------|
|      |                     | Spn pneumoniae deaths (UR) | Spn pneumoniae deaths, HIV (UR) | Spn pneumoniae mortality rate (UR) | Spn pneumoniae mortality rate, HIV (UR) | Spn meningitis deaths (UR) | Spn meningitis deaths, HIV (UR) | Spn meningitis mortality rate (UR) | Spn meningitis mortality rate, HIV (UR) | Spn NPNM deaths (UR) | Spn NPNM deaths, HIV (UR) | Spn NPNM mortality rate (UR) | Spn NPNM mortality rate, HIV (UR) |
| 2000 | Afghanistan         | 8257 (8555-8605)           |                                 | 213 (151-222)                      |                                         | 1588 (838-3366)            |                                 | 41 (16-87)                         |                                         | 499 (200-1058)       |                           | 13 (5-27)                    |                                   |
| 2001 | Afghanistan         | 8415 (5967-8769)           |                                 | 209 (148-218)                      |                                         | 1617 (852-3421)            |                                 | 40 (16-85)                         |                                         | 508 (205-1076)       |                           | 13 (5-27)                    |                                   |
| 2002 | Afghanistan         | 8520 (6041-8879)           |                                 | 203 (144-212)                      |                                         | 1622 (858-3425)            |                                 | 39 (16-82)                         |                                         | 510 (207-1077)       |                           | 12 (5-26)                    |                                   |
| 2003 | Afghanistan         | 8598 (6097-8960)           |                                 | 198 (140-206)                      |                                         | 1623 (861-3418)            |                                 | 37 (15-79)                         |                                         | 510 (208-1074)       |                           | 12 (5-25)                    |                                   |
| 2004 | Afghanistan         | 8603 (6101-8966)           |                                 | 192 (136-200)                      |                                         | 1609 (859-3378)            |                                 | 36 (15-75)                         |                                         | 506 (207-1062)       |                           | 11 (5-24)                    |                                   |
| 2005 | Afghanistan         | 8534 (6051-8894)           |                                 | 186 (132-194)                      |                                         | 1579 (850-3307)            |                                 | 34 (14-72)                         |                                         | 496 (204-1040)       |                           | 11 (4-23)                    |                                   |
| 2006 | Afghanistan         | 8493 (6022-8851)           |                                 | 181 (128-188)                      |                                         | 1453 (642-3244)            |                                 | 33 (14-69)                         |                                         | 488 (202-1020)       |                           | 10 (4-22)                    |                                   |
| 2007 | Afghanistan         | 8394 (5952-8747)           |                                 | 175 (124-183)                      |                                         | 1511 (828-3147)            |                                 | 32 (13-66)                         |                                         | 475 (197-989)        |                           | 10 (4-21)                    |                                   |
| 2008 | Afghanistan         | 8267 (5862-8616)           |                                 | 171 (121-178)                      |                                         | 1462 (810-3039)            |                                 | 30 (13-63)                         |                                         | 460 (192-955)        |                           | 9 (4-20)                     |                                   |
| 2009 | Afghanistan         | 8113 (5753-8455)           |                                 | 166 (118-173)                      |                                         | 1407 (690-2916)            |                                 | 29 (12-60)                         |                                         | 442 (185-917)        |                           | 9 (4-19)                     |                                   |
| 2010 | Afghanistan         | 7920 (5616-8254)           |                                 | 161 (114-167)                      |                                         | 1348 (668-2789)            |                                 | 27 (12-57)                         |                                         | 424 (178-877)        |                           | 9 (4-19)                     |                                   |
| 2011 | Afghanistan         | 7863 (5434-7986)           |                                 | 155 (110-162)                      |                                         | 1286 (641-2658)            |                                 | 26 (11-54)                         |                                         | 404 (170-836)        |                           | 8 (3-17)                     |                                   |
| 2012 | Afghanistan         | 7369 (5225-7679)           |                                 | 149 (106-156)                      |                                         | 1223 (617-2522)            |                                 | 25 (10-51)                         |                                         | 385 (163-793)        |                           | 8 (3-16)                     |                                   |
| 2013 | Afghanistan         | 7046 (4996-7343)           |                                 | 143 (102-150)                      |                                         | 1164 (495-2395)            |                                 | 24 (10-49)                         |                                         | 366 (156-753)        |                           | 7 (3-15)                     |                                   |
| 2014 | Afghanistan         | 5496 (3897-5728)           |                                 | 113 (80-117)                       |                                         | 880 (376-1806)             |                                 | 18 (8-37)                          |                                         | 277 (118-568)        |                           | 6 (2-12)                     |                                   |
| 2015 | Afghanistan         | 4199 (2978-4376)           | 7 (5-8)                         | 86 (61-90)                         | 0 (0-0)                                 | 667 (286-1366)             | 1 (1-2)                         | 14 (6-28)                          | 0 (0-0)                                 | 210 (90-429)         | 0 (0-1)                   | 4 (2-9)                      | 0 (0-0)                           |
| 2000 | Albania             | 72 (51-75)                 |                                 | 26 (19-27)                         |                                         | 5 (2-19)                   |                                 | 2 (1-7)                            |                                         | 5 (2-17)             |                           | 2 (1-6)                      |                                   |
| 2001 | Albania             | 62 (44-65)                 |                                 | 24 (17-25)                         |                                         | 4 (1-17)                   |                                 | 2 (0-7)                            |                                         | 4 (1-16)             |                           | 1 (0-6)                      |                                   |
| 2002 | Albania             | 53 (38-55)                 |                                 | 21 (15-22)                         |                                         | 4 (1-16)                   |                                 | 1 (0-6)                            |                                         | 3 (1-14)             |                           | 1 (0-6)                      |                                   |
| 2003 | Albania             | 46 (33-48)                 |                                 | 19 (14-20)                         |                                         | 3 (1-14)                   |                                 | 1 (0-6)                            |                                         | 3 (1-13)             |                           | 1 (0-5)                      |                                   |
| 2004 | Albania             | 40 (28-42)                 |                                 | 18 (13-19)                         |                                         | 3 (0-13)                   |                                 | 1 (0-6)                            |                                         | 2 (0-11)             |                           | 1 (0-5)                      |                                   |
| 2005 | Albania             | 35 (25-36)                 |                                 | 17 (12-17)                         |                                         | 2 (0-11)                   |                                 | 1 (0-5)                            |                                         | 2 (0-10)             |                           | 1 (0-5)                      |                                   |
| 2006 | Albania             | 30 (21-31)                 |                                 | 15 (11-16)                         |                                         | 2 (0-10)                   |                                 | 1 (0-5)                            |                                         | 2 (0-9)              |                           | 1 (0-4)                      |                                   |
| 2007 | Albania             | 26 (19-28)                 |                                 | 14 (10-15)                         |                                         | 2 (0-8)                    |                                 | 1 (0-4)                            |                                         | 2 (0-7)              |                           | 1 (0-4)                      |                                   |
| 2008 | Albania             | 23 (16-24)                 |                                 | 14 (10-14)                         |                                         | 2 (0-7)                    |                                 | 1 (0-6)                            |                                         | 1 (0-6)              |                           | 1 (0-4)                      |                                   |
| 2009 | Albania             | 23 (17-24)                 |                                 | 15 (10-15)                         |                                         | 3 (1-11)                   |                                 | 2 (0-7)                            |                                         | 2 (1-10)             |                           | 1 (0-6)                      |                                   |
| 2010 | Albania             | 23 (16-24)                 |                                 | 15 (10-15)                         |                                         | 2 (1-11)                   |                                 | 2 (0-7)                            |                                         | 2 (1-9)              |                           | 1 (0-6)                      |                                   |
| 2011 | Albania             | 14 (10-15)                 |                                 | 9 (6-10)                           |                                         | 1 (0-6)                    |                                 | 1 (0-4)                            |                                         | 1 (0-5)              |                           | 1 (0-3)                      |                                   |
| 2012 | Albania             | 12 (8-12)                  |                                 | 7 (5-8)                            |                                         | 1 (0-5)                    |                                 | 1 (0-3)                            |                                         | 1 (0-4)              |                           | 1 (0-3)                      |                                   |
| 2013 | Albania             | 11 (8-11)                  |                                 | 6 (5-7)                            |                                         | 1 (0-4)                    |                                 | 1 (0-3)                            |                                         | 1 (0-4)              |                           | 1 (0-2)                      |                                   |
| 2014 | Albania             | 11 (8-12)                  |                                 | 6 (4-7)                            |                                         | 1 (0-4)                    |                                 | 1 (0-4)                            |                                         | 1 (0-4)              |                           | 1 (0-2)                      |                                   |
| 2015 | Albania             | 9 (6-9)                    | 0 (0-0)                         | 5 (3-5)                            | 0 (0-0)                                 | 1 (0-3)                    | 0 (0-0)                         | 0 (0-2)                            | 0 (0-0)                                 | 1 (0-3)              | 0 (0-0)                   | 0 (0-2)                      | 0 (0-0)                           |
| 2000 | Algeria             | 1054 (747-1098)            |                                 | 35 (25-36)                         |                                         | 107 (38-233)               |                                 | 4 (1-8)                            |                                         | 96 (34-208)          |                           | 3 (1-7)                      |                                   |
| 2001 | Algeria             | 1007 (714-1049)            |                                 | 35 (25-36)                         |                                         | 102 (36-221)               |                                 | 3 (1-8)                            |                                         | 91 (32-197)          |                           | 3 (1-7)                      |                                   |
| 2002 | Algeria             | 964 (684-1005)             |                                 | 34 (24-35)                         |                                         | 97 (35-209)                |                                 | 3 (1-7)                            |                                         | 86 (31-186)          |                           | 3 (1-7)                      |                                   |
| 2003 | Algeria             | 932 (661-972)              |                                 | 33 (23-34)                         |                                         | 92 (33-200)                |                                 | 3 (1-7)                            |                                         | 82 (30-178)          |                           | 3 (1-6)                      |                                   |
| 2004 | Algeria             | 911 (645-949)              |                                 | 32 (23-33)                         |                                         | 90 (32-194)                |                                 | 3 (1-7)                            |                                         | 80 (29-172)          |                           | 3 (1-6)                      |                                   |
| 2005 | Algeria             | 894 (634-932)              |                                 | 31 (22-32)                         |                                         | 88 (33-189)                |                                 | 3 (1-6)                            |                                         | 78 (28-168)          |                           | 3 (1-6)                      |                                   |
| 2006 | Algeria             | 901 (639-939)              |                                 | 30 (21-31)                         |                                         | 88 (32-190)                |                                 | 3 (1-6)                            |                                         | 79 (28-169)          |                           | 3 (1-6)                      |                                   |
| 2007 | Algeria             | 908 (644-947)              |                                 | 28 (20-30)                         |                                         | 89 (33-190)                |                                 | 3 (1-6)                            |                                         | 79 (29-170)          |                           | 2 (1-5)                      |                                   |
| 2008 | Algeria             | 930 (659-969)              |                                 | 28 (20-29)                         |                                         | 91 (25-231)                |                                 | 3 (1-7)                            |                                         | 81 (22-205)          |                           | 2 (1-6)                      |                                   |
| 2009 | Algeria             | 941 (667-980)              |                                 | 26 (19-27)                         |                                         | 93 (26-232)                |                                 | 3 (1-6)                            |                                         | 83 (23-207)          |                           | 2 (1-6)                      |                                   |
| 2010 | Algeria             | 950 (674-990)              |                                 | 25 (18-26)                         |                                         | 94 (27-233)                |                                 | 2 (1-6)                            |                                         | 84 (24-208)          |                           | 2 (1-5)                      |                                   |
| 2011 | Algeria             | 956 (678-997)              |                                 | 24 (17-25)                         |                                         | 95 (29-234)                |                                 | 2 (1-6)                            |                                         | 85 (25-208)          |                           | 2 (1-6)                      |                                   |
| 2012 | Algeria             | 969 (687-1010)             |                                 | 23 (16-24)                         |                                         | 97 (30-235)                |                                 | 2 (1-6)                            |                                         | 86 (27-209)          |                           | 2 (1-5)                      |                                   |
| 2013 | Algeria             | 978 (694-1019)             |                                 | 22 (16-23)                         |                                         | 98 (31-237)                |                                 | 2 (1-5)                            |                                         | 87 (27-211)          |                           | 2 (1-5)                      |                                   |
| 2014 | Algeria             | 974 (691-1015)             |                                 | 22 (16-23)                         |                                         | 97 (30-235)                |                                 | 2 (1-5)                            |                                         | 87 (27-210)          |                           | 2 (1-5)                      |                                   |
| 2015 | Algeria             | 972 (689-1013)             | 1 (1-1)                         | 22 (15-22)                         | 0 (0-0)                                 | 97 (30-234)                | 0 (0-0)                         | 2 (1-5)                            | 0 (0-0)                                 | 87 (27-209)          | 0 (0-0)                   | 2 (1-5)                      | 0 (0-0)                           |
| 2000 | Andorra             | 0 (0-0)                    |                                 | 1 (1-1)                            |                                         | 0 (0-0)                    |                                 | 0 (0-1)                            |                                         | 0 (0-0)              |                           | 0 (0-0)                      |                                   |
| 2001 | Andorra             | 0 (0-0)                    |                                 | 2 (1-2)                            |                                         | 0 (0-0)                    |                                 | 1 (0-1)                            |                                         | 0 (0-0)              |                           | 1 (0-1)                      |                                   |
| 2002 | Andorra             | 0 (0-0)                    |                                 | 2 (1-2)                            |                                         | 0 (0-0)                    |                                 | 1 (0-1)                            |                                         | 0 (0-0)              |                           | 1 (0-1)                      |                                   |
| 2003 | Andorra             | 0 (0-0)                    |                                 | 2 (1-2)                            |                                         | 0 (0-0)                    |                                 | 1 (0-1)                            |                                         | 0 (0-0)              |                           | 1 (0-1)                      |                                   |
| 2004 | Andorra             | 0 (0-0)                    |                                 | 2 (1-2)                            |                                         | 0 (0-0)                    |                                 | 1 (0-1)                            |                                         | 0 (0-0)              |                           | 1 (0-1)                      |                                   |
| 2005 | Andorra             | 0 (0-0)                    |                                 | 2 (1-2)                            |                                         | 0 (0-0)                    |                                 | 1 (0-1)                            |                                         | 0 (0-0)              |                           | 1 (0-1)                      |                                   |
| 2006 | Andorra             | 0 (0-0)                    |                                 | 1 (1-1)                            |                                         | 0 (0-0)                    |                                 | 0 (0-0)                            |                                         | 0 (0-0)              |                           | 0 (0-0)                      |                                   |
| 2007 | Andorra             | 0 (0-0)                    |                                 | 1 (1-1)                            |                                         | 0 (0-0)                    |                                 | 0 (0-0)                            |                                         | 0 (0-0)              |                           | 0 (0-0)                      |                                   |
| 2008 | Andorra             | 0 (0-0)                    |                                 | 0 (0-0)                            |                                         | 0 (0-0)                    |                                 | 0 (0-0)                            |                                         | 0 (0-0)              |                           | 0 (0-0)                      |                                   |
| 2009 | Andorra             | 0 (0-0)                    |                                 | 0 (0-0)                            |                                         | 0 (0-0)                    |                                 | 0 (0-0)                            |                                         | 0 (0-0)              |                           | 0 (0-0)                      |                                   |
| 2010 | Andorra             | 0 (0-0)                    |                                 | 0 (0-0)                            |                                         | 0 (0-0)                    |                                 | 0 (0-0)                            |                                         | 0 (0-0)              |                           | 0 (0-0)                      |                                   |
| 2011 | Andorra             | 0 (0-0)                    |                                 | 0 (0-0)                            |                                         | 0 (0-0)                    |                                 | 0 (0-0)                            |                                         | 0 (0-0)              |                           | 0 (0-0)                      |                                   |
| 2012 | Andorra             | 0 (0-0)                    |                                 | 0 (0-0)                            |                                         | 0 (0-0)                    |                                 | 0 (0-0)                            |                                         | 0 (0-0)              |                           | 0 (0-0)                      |                                   |
| 2013 | Andorra             | 0 (0-0)                    |                                 | 0 (0-0)                            |                                         | 0 (0-0)                    |                                 | 0 (0-0)                            |                                         | 0 (0-0)              |                           | 0 (0-0)                      |                                   |
| 2014 | Andorra             | 0 (0-0)                    |                                 | 0 (0-0)                            |                                         | 0 (0-0)                    |                                 | 0 (0-0)                            |                                         | 0 (0-0)              |                           | 0 (0-0)                      |                                   |
| 2015 | Andorra             | 0 (0-0)                    | 0 (0-0)                         | 0 (0-0)                            | 0 (0-0)                                 | 0 (0-0)                    | 0 (0-0)                         | 0 (0-0)                            | 0 (0-0)                                 | 0 (0-0)              | 0 (0-0)                   | 0 (0-0)                      | 0 (0-0)                           |
| 2000 | Angola              | 9355 (6633-9749)           |                                 | 319 (226-332)                      |                                         | 1305 (688-2497)            |                                 | 44 (23-85)                         |                                         | 410 (216-785)        |                           | 14 (7-27)                    |                                   |
| 2001 | Angola              | 9584 (6796-9988)           |                                 | 314 (223-328)                      |                                         | 1322 (697-2528)            |                                 | 43 (23-83)                         |                                         | 416 (219-795)        |                           | 14 (7-26)                    |                                   |
| 2002 | Angola              | 10074 (7143-10499)         |                                 | 319 (226-332)                      |                                         | 1369 (723-2616)            |                                 | 43 (23-83)                         |                                         | 430 (227-822)        |                           | 14 (7-26)                    |                                   |
| 2003 | Angola              | 10368 (7352-10806)         |                                 | 317 (225-331)                      |                                         | 1381 (730-2637)            |                                 | 42 (22-81)                         |                                         | 434 (229-829)        |                           | 13 (7-25)                    |                                   |
| 2004 | Angola              | 10743 (7618-11196)         |                                 | 318 (225-331)                      |                                         | 1393 (737-2657)            |                                 | 41 (22-79)                         |                                         | 438 (232-835)        |                           | 13 (7-25)                    |                                   |
| 2005 | Angola              | 11195 (7938-11667)         |                                 | 320 (227-333)                      |                                         | 1418 (751-2703)            |                                 | 41 (21-77)                         |                                         | 446 (236-850)        |                           | 13 (7-24)                    |                                   |
| 2006 | Angola              | 11687 (8287-12179)         |                                 | 322 (228-335)                      |                                         | 1444 (766-2750)            |                                 | 40 (21-76)                         |                                         | 454 (241-865)        |                           | 13 (7-24)                    |                                   |
| 2007 | Angola              | 12096 (8577-12606)         |                                 | 322 (229-336)                      |                                         | 1464 (778-2783)            |                                 | 39 (21-74)                         |                                         | 460 (245-875)        |                           | 12 (7-23)                    |                                   |
| 2008 | Angola              | 12432 (8815-12956)         |                                 | 322 (228-335)                      |                                         | 1484 (790-2816)            |                                 | 38 (20-73)                         |                                         | 467 (248-885)        |                           | 12 (6-23)                    |                                   |
| 2009 | Angola              | 12606 (8939-13137)         |                                 | 317 (225-330)                      |                                         | 1487 (793-2817)            |                                 | 37 (20-71)                         |                                         | 467 (249-886)        |                           | 12 (6-22)                    |                                   |
| 2010 | Angola              | 12681 (8992-13216)         |                                 | 310 (220-323)                      |                                         | 1491 (797-2819)            |                                 | 36 (19-69)                         |                                         | 469 (250-886)        |                           | 11 (6-22)                    |                                   |
| 2011 | Angola              | 12611 (8943-13143)         |                                 | 299 (212-312)                      |                                         | 1484 (795-2813)            |                                 | 35 (19-66)                         |                                         | 467 (250-880)        |                           | 11 (6-21)                    |                                   |
| 2012 | Angola              | 12462 (8837-12988)         |                                 | 288 (204-300)                      |                                         | 1467 (788-2783)            |                                 | 34 (18-64)                         |                                         | 461 (248-869)        |                           | 11 (6-20)                    |                                   |
| 2013 | Angola              | 11867 (8415-12368)         |                                 | 268 (190-279)                      |                                         | 1387 (747-2608)            |                                 | 31 (17-59)                         |                                         | 436 (235-820)        |                           | 10 (5-19)                    |                                   |
| 2014 | Angola              | 10033 (7115-10456)         |                                 | 221 (157-231)                      |                                         | 1145 (618-2149)            |                                 | 25 (14-47)                         |                                         | 360 (194-676)        |                           | 8 (4-15)                     |                                   |
| 2015 | Angola              | 8704 (6172-9071)           | 1161 (824-1210)                 | 188 (133-196)                      | 25 (18-26)                              | 984 (533-1844)             | 131 (71-246)                    | 21 (11-40)                         | 3 (2-5)                                 | 310 (188-580)        | 41 (22-77)                | 7 (4-12)                     | 1 (0-2)                           |
| 2000 | Antigua and Barbuda | 0 (0-0)                    |                                 | 0 (0-0)                            |                                         | 0 (0-0)                    |                                 | 2 (1-4)                            |                                         | 0 (0-0)              |                           | 2 (1-3)                      |                                   |
| 2001 | Antigua and Barbuda | 0 (0-0)                    |                                 | 3 (2-3)                            |                                         | 0 (0-0)                    |                                 | 6 (3-10)                           |                                         | 0 (0-1)              |                           | 5 (3-9)                      |                                   |
| 2002 | Antigua and Barbuda | 0 (0-0)                    |                                 | 3 (2-4)                            |                                         | 1 (0-1)                    |                                 | 7 (3-11)                           |                                         | 0 (0-1)              |                           | 6 (3-9)                      |                                   |
| 2003 | Antigua and Barbuda | 0 (0-0)                    |                                 | 5 (4-5)                            |                                         | 0 (0-1)                    |                                 | 4 (2-7)                            |                                         | 0 (0-0)              |                           | 4 (2-6)                      |                                   |
| 2004 | Antigua and Barbuda | 0 (0-0)                    |                                 | 5 (3-5)                            |                                         | 0 (0-0)                    |                                 | 3 (2-5)                            |                                         | 0 (0-0)              |                           | 3 (1-5)                      |                                   |
| 2005 | Antigua and Barbuda |                            |                                 |                                    |                                         |                            |                                 |                                    |                                         |                      |                           |                              |                                   |

| Year | Country             | Spn pneumonia deaths (UR) | Spn pneumonia deaths, HIV (UR) | Spn pneumonia mortality rate (UR) | Spn pneumonia mortality rate, HIV (UR) | Spn meningitis deaths (UR) | Spn meningitis deaths, HIV (UR) | Spn meningitis mortality rate (UR) | Spn meningitis mortality rate, HIV (UR) | Spn NPNM deaths (UR) | Spn NPNM deaths, HIV (UR) | Spn NPNM mortality rate (UR) | Spn NPNM mortality rate, HIV (UR) |
|------|---------------------|---------------------------|--------------------------------|-----------------------------------|----------------------------------------|----------------------------|---------------------------------|------------------------------------|-----------------------------------------|----------------------|---------------------------|------------------------------|-----------------------------------|
| 2007 | Antigua and Barbuda | 0 (0-0)                   |                                | 4 (3-4)                           |                                        | 0 (0-0)                    |                                 | 0 (0-0)                            |                                         | 0 (0-0)              |                           | 0 (0-0)                      |                                   |
| 2008 | Antigua and Barbuda | 0 (0-0)                   |                                | 4 (3-4)                           |                                        | 0 (0-0)                    |                                 | 0 (0-0)                            |                                         | 0 (0-0)              |                           | 0 (0-0)                      |                                   |
| 2009 | Antigua and Barbuda | 0 (0-0)                   |                                | 4 (3-4)                           |                                        | 0 (0-0)                    |                                 | 0 (0-0)                            |                                         | 0 (0-0)              |                           | 0 (0-0)                      |                                   |
| 2010 | Antigua and Barbuda | 0 (0-0)                   |                                | 3 (2-3)                           |                                        | 0 (0-0)                    |                                 | 0 (0-0)                            |                                         | 0 (0-0)              |                           | 0 (0-0)                      |                                   |
| 2011 | Antigua and Barbuda | 0 (0-0)                   |                                | 2 (2-2)                           |                                        | 0 (0-0)                    |                                 | 0 (0-0)                            |                                         | 0 (0-0)              |                           | 0 (0-0)                      |                                   |
| 2012 | Antigua and Barbuda | 0 (0-0)                   |                                | 2 (2-2)                           |                                        | 0 (0-0)                    |                                 | 0 (0-0)                            |                                         | 0 (0-0)              |                           | 0 (0-0)                      |                                   |
| 2013 | Antigua and Barbuda | 0 (0-0)                   |                                | 2 (1-2)                           |                                        | 0 (0-0)                    |                                 | 0 (0-0)                            |                                         | 0 (0-0)              |                           | 0 (0-0)                      |                                   |
| 2014 | Antigua and Barbuda | 0 (0-0)                   |                                | 2 (2-2)                           |                                        | 0 (0-0)                    |                                 | 0 (0-0)                            |                                         | 0 (0-0)              |                           | 0 (0-0)                      |                                   |
| 2015 | Antigua and Barbuda | 0 (0-0)                   |                                | 2 (2-2)                           | 0 (0-0)                                | 0 (0-0)                    |                                 | 0 (0-0)                            | 0 (0-0)                                 | 0 (0-0)              |                           | 0 (0-0)                      | 0 (0-0)                           |
| 2000 | Argentina           | 350 (248-365)             |                                | 10 (7-11)                         |                                        | 98 (44-201)                |                                 | 3 (1-6)                            |                                         | 87 (39-179)          |                           | 3 (1-6)                      |                                   |
| 2001 | Argentina           | 363 (258-378)             |                                | 11 (8-11)                         |                                        | 88 (40-181)                |                                 | 3 (1-5)                            |                                         | 79 (35-161)          |                           | 2 (1-5)                      |                                   |
| 2002 | Argentina           | 349 (248-364)             |                                | 10 (7-11)                         |                                        | 96 (43-195)                |                                 | 3 (1-6)                            |                                         | 85 (38-174)          |                           | 2 (1-5)                      |                                   |
| 2003 | Argentina           | 549 (390-572)             |                                | 16 (11-17)                        |                                        | 113 (51-229)               |                                 | 3 (1-7)                            |                                         | 100 (45-204)         |                           | 3 (1-6)                      |                                   |
| 2004 | Argentina           | 398 (282-414)             |                                | 11 (8-12)                         |                                        | 114 (52-231)               |                                 | 3 (1-7)                            |                                         | 101 (46-205)         |                           | 3 (1-6)                      |                                   |
| 2005 | Argentina           | 320 (227-334)             |                                | 9 (6-9)                           |                                        | 102 (47-206)               |                                 | 3 (1-6)                            |                                         | 91 (42-184)          |                           | 3 (1-5)                      |                                   |
| 2006 | Argentina           | 340 (241-355)             |                                | 10 (7-10)                         |                                        | 98 (45-197)                |                                 | 3 (1-5)                            |                                         | 87 (40-175)          |                           | 2 (1-5)                      |                                   |
| 2007 | Argentina           | 398 (283-415)             |                                | 11 (8-12)                         |                                        | 82 (38-164)                |                                 | 2 (1-5)                            |                                         | 73 (33-146)          |                           | 2 (1-4)                      |                                   |
| 2008 | Argentina           | 342 (243-356)             |                                | 10 (7-10)                         |                                        | 84 (39-167)                |                                 | 2 (1-5)                            |                                         | 74 (34-149)          |                           | 2 (1-4)                      |                                   |
| 2009 | Argentina           | 418 (296-435)             |                                | 12 (8-12)                         |                                        | 81 (37-161)                |                                 | 2 (1-5)                            |                                         | 72 (33-144)          |                           | 2 (1-4)                      |                                   |
| 2010 | Argentina           | 309 (219-322)             |                                | 9 (6-9)                           |                                        | 90 (42-178)                |                                 | 3 (1-5)                            |                                         | 80 (37-159)          |                           | 2 (1-4)                      |                                   |
| 2011 | Argentina           | 314 (223-328)             |                                | 9 (6-9)                           |                                        | 66 (31-131)                |                                 | 2 (1-4)                            |                                         | 59 (27-116)          |                           | 2 (1-3)                      |                                   |
| 2012 | Argentina           | 238 (168-248)             |                                | 7 (5-7)                           |                                        | 62 (28-123)                |                                 | 2 (1-3)                            |                                         | 55 (26-109)          |                           | 2 (1-3)                      |                                   |
| 2013 | Argentina           | 190 (135-198)             |                                | 5 (4-5)                           |                                        | 42 (19-82)                 |                                 | 1 (1-2)                            |                                         | 37 (17-73)           |                           | 1 (1-2)                      |                                   |
| 2014 | Argentina           | 163 (115-189)             |                                | 4 (3-5)                           |                                        | 37 (18-74)                 |                                 | 1 (1-2)                            |                                         | 33 (16-66)           |                           | 1 (1-2)                      |                                   |
| 2015 | Argentina           | 154 (109-161)             | 1 (1-1)                        | 4 (3-4)                           | 0 (0-0)                                | 36 (17-72)                 |                                 | 1 (1-2)                            | 0 (0-0)                                 | 32 (15-64)           | 0 (0-0)                   | 1 (1-2)                      | 0 (0-0)                           |
| 2000 | Armenia             | 52 (37-54)                |                                | 27 (19-28)                        |                                        | 7 (2-16)                   |                                 | 3 (1-8)                            |                                         | 6 (2-14)             |                           | 3 (1-7)                      |                                   |
| 2001 | Armenia             | 49 (35-51)                |                                | 26 (19-28)                        |                                        | 6 (1-16)                   |                                 | 3 (1-10)                           |                                         | 6 (1-16)             |                           | 3 (1-9)                      |                                   |
| 2002 | Armenia             | 46 (33-48)                |                                | 25 (18-26)                        |                                        | 6 (1-17)                   |                                 | 3 (1-9)                            |                                         | 5 (1-15)             |                           | 3 (1-8)                      |                                   |
| 2003 | Armenia             | 45 (32-46)                |                                | 24 (17-25)                        |                                        | 6 (1-17)                   |                                 | 3 (1-9)                            |                                         | 5 (1-15)             |                           | 3 (1-8)                      |                                   |
| 2004 | Armenia             | 43 (30-44)                |                                | 22 (16-23)                        |                                        | 6 (1-16)                   |                                 | 3 (1-8)                            |                                         | 5 (1-14)             |                           | 3 (1-8)                      |                                   |
| 2005 | Armenia             | 40 (28-42)                |                                | 20 (15-21)                        |                                        | 6 (1-15)                   |                                 | 3 (1-8)                            |                                         | 5 (1-14)             |                           | 3 (1-7)                      |                                   |
| 2006 | Armenia             | 37 (26-39)                |                                | 18 (13-19)                        |                                        | 5 (1-15)                   |                                 | 3 (1-7)                            |                                         | 5 (1-13)             |                           | 2 (1-6)                      |                                   |
| 2007 | Armenia             | 35 (25-36)                |                                | 17 (12-17)                        |                                        | 5 (1-14)                   |                                 | 2 (1-7)                            |                                         | 4 (1-12)             |                           | 2 (1-6)                      |                                   |
| 2008 | Armenia             | 32 (22-33)                |                                | 15 (11-16)                        |                                        | 5 (1-12)                   |                                 | 2 (1-6)                            |                                         | 4 (1-11)             |                           | 2 (1-5)                      |                                   |
| 2009 | Armenia             | 29 (21-30)                |                                | 14 (10-14)                        |                                        | 4 (1-11)                   |                                 | 2 (1-5)                            |                                         | 4 (1-10)             |                           | 2 (1-5)                      |                                   |
| 2010 | Armenia             | 28 (20-29)                |                                | 13 (9-14)                         |                                        | 6 (1-15)                   |                                 | 3 (1-7)                            |                                         | 5 (1-14)             |                           | 2 (1-6)                      |                                   |
| 2011 | Armenia             | 27 (19-29)                |                                | 13 (9-14)                         |                                        | 7 (2-19)                   |                                 | 3 (1-9)                            |                                         | 7 (2-17)             |                           | 3 (1-8)                      |                                   |
| 2012 | Armenia             | 25 (18-26)                |                                | 12 (8-12)                         |                                        | 7 (2-17)                   |                                 | 3 (1-8)                            |                                         | 6 (2-15)             |                           | 3 (1-7)                      |                                   |
| 2013 | Armenia             | 22 (16-23)                |                                | 11 (8-11)                         |                                        | 6 (2-15)                   |                                 | 3 (1-7)                            |                                         | 5 (2-13)             |                           | 3 (1-6)                      |                                   |
| 2014 | Armenia             | 20 (14-21)                |                                | 10 (7-10)                         |                                        | 5 (2-13)                   |                                 | 3 (1-6)                            |                                         | 5 (2-12)             |                           | 2 (1-6)                      |                                   |
| 2015 | Armenia             | 16 (12-17)                | 0 (0-0)                        | 8 (6-8)                           | 0 (0-0)                                | 4 (2-10)                   | 0 (0-0)                         | 2 (1-5)                            | 0 (0-0)                                 | 4 (1-9)              | 0 (0-0)                   | 2 (1-4)                      | 0 (0-0)                           |
| 2000 | Australia           | 15 (10-15)                |                                | 1 (1-1)                           |                                        | 12 (6-22)                  |                                 | 1 (1-2)                            |                                         | 11 (6-20)            |                           | 1 (1-2)                      |                                   |
| 2001 | Australia           | 21 (15-21)                |                                | 2 (1-2)                           |                                        | 18 (8-32)                  |                                 | 1 (1-3)                            |                                         | 16 (7-29)            |                           | 1 (1-2)                      |                                   |
| 2002 | Australia           | 16 (11-16)                |                                | 1 (1-1)                           |                                        | 6 (3-11)                   |                                 | 1 (1-1)                            |                                         | 6 (3-10)             |                           | 0 (0-1)                      |                                   |
| 2003 | Australia           | 22 (16-23)                |                                | 2 (1-2)                           |                                        | 13 (6-23)                  |                                 | 1 (1-2)                            |                                         | 11 (5-20)            |                           | 1 (1-2)                      |                                   |
| 2004 | Australia           | 28 (20-29)                |                                | 2 (2-2)                           |                                        | 14 (6-24)                  |                                 | 1 (1-2)                            |                                         | 12 (6-22)            |                           | 1 (1-2)                      |                                   |
| 2005 | Australia           | 18 (12-18)                |                                | 1 (1-1)                           |                                        | 9 (4-17)                   |                                 | 1 (1-1)                            |                                         | 8 (4-15)             |                           | 1 (1-1)                      |                                   |
| 2006 | Australia           | 14 (10-14)                |                                | 1 (1-1)                           |                                        | 8 (4-14)                   |                                 | 1 (1-1)                            |                                         | 7 (3-12)             |                           | 1 (1-1)                      |                                   |
| 2007 | Australia           | 13 (9-14)                 |                                | 1 (1-1)                           |                                        | 4 (2-7)                    |                                 | 0 (0-1)                            |                                         | 4 (2-6)              |                           | 0 (0-0)                      |                                   |
| 2008 | Australia           | 10 (7-10)                 |                                | 1 (1-1)                           |                                        | 5 (2-8)                    |                                 | 0 (0-1)                            |                                         | 4 (2-8)              |                           | 0 (0-1)                      |                                   |
| 2009 | Australia           | 11 (8-11)                 |                                | 1 (1-1)                           |                                        | 2 (1-4)                    |                                 | 0 (0-0)                            |                                         | 2 (1-4)              |                           | 0 (0-0)                      |                                   |
| 2010 | Australia           | 17 (12-18)                |                                | 1 (1-1)                           |                                        | 7 (3-13)                   |                                 | 1 (1-1)                            |                                         | 6 (3-11)             |                           | 0 (0-1)                      |                                   |
| 2011 | Australia           | 9 (6-9)                   |                                | 1 (1-1)                           |                                        | 4 (2-7)                    |                                 | 0 (0-0)                            |                                         | 4 (2-6)              |                           | 0 (0-0)                      |                                   |
| 2012 | Australia           | 5 (4-5)                   |                                | 0 (0-0)                           |                                        | 2 (1-4)                    |                                 | 0 (0-0)                            |                                         | 2 (1-4)              |                           | 0 (0-0)                      |                                   |
| 2013 | Australia           | 5 (3-5)                   |                                | 0 (0-0)                           |                                        | 2 (1-3)                    |                                 | 0 (0-0)                            |                                         | 2 (1-3)              |                           | 0 (0-0)                      |                                   |
| 2014 | Australia           | 4 (3-5)                   |                                | 0 (0-0)                           |                                        | 2 (1-3)                    |                                 | 0 (0-0)                            |                                         | 1 (1-3)              |                           | 0 (0-0)                      |                                   |
| 2015 | Australia           | 4 (3-5)                   | 0 (0-0)                        | 0 (0-0)                           | 0 (0-0)                                | 2 (1-3)                    | 0 (0-0)                         | 0 (0-0)                            | 0 (0-0)                                 | 1 (1-2)              | 0 (0-0)                   | 0 (0-0)                      | 0 (0-0)                           |
| 2000 | Austria             | 2 (2-2)                   |                                | 1 (0-1)                           |                                        | 2 (1-4)                    |                                 | 1 (0-1)                            |                                         | 2 (1-4)              |                           | 0 (0-1)                      |                                   |
| 2001 | Austria             | 4 (3-4)                   |                                | 1 (1-1)                           |                                        | 2 (1-4)                    |                                 | 1 (1-1)                            |                                         | 2 (1-4)              |                           | 1 (1-1)                      |                                   |
| 2002 | Austria             | 5 (3-5)                   |                                | 1 (1-1)                           |                                        | 2 (1-3)                    |                                 | 0 (0-1)                            |                                         | 1 (1-2)              |                           | 0 (0-1)                      |                                   |
| 2003 | Austria             | 2 (1-2)                   |                                | 0 (0-0)                           |                                        | 3 (1-5)                    |                                 | 1 (1-1)                            |                                         | 2 (1-4)              |                           | 1 (1-1)                      |                                   |
| 2004 | Austria             | 5 (3-5)                   |                                | 1 (1-1)                           |                                        | 2 (1-3)                    |                                 | 0 (0-1)                            |                                         | 2 (1-3)              |                           | 0 (0-1)                      |                                   |
| 2005 | Austria             | 1 (0-1)                   |                                | 0 (0-0)                           |                                        | 2 (1-4)                    |                                 | 1 (1-1)                            |                                         | 2 (1-4)              |                           | 1 (1-1)                      |                                   |
| 2006 | Austria             | 2 (1-2)                   |                                | 0 (0-0)                           |                                        | 2 (1-4)                    |                                 | 1 (1-1)                            |                                         | 2 (1-4)              |                           | 0 (0-1)                      |                                   |
| 2007 | Austria             | 2 (1-2)                   |                                | 0 (0-1)                           |                                        | 0 (0-1)                    |                                 | 0 (0-0)                            |                                         | 0 (0-1)              |                           | 0 (0-0)                      |                                   |
| 2008 | Austria             | 2 (1-2)                   |                                | 1 (0-1)                           |                                        | 3 (1-5)                    |                                 | 1 (1-1)                            |                                         | 3 (1-5)              |                           | 1 (1-1)                      |                                   |
| 2009 | Austria             | 2 (2-3)                   |                                | 1 (0-1)                           |                                        | 3 (2-6)                    |                                 | 1 (1-2)                            |                                         | 3 (1-5)              |                           | 1 (1-1)                      |                                   |
| 2010 | Austria             | 2 (1-2)                   |                                | 1 (0-1)                           |                                        | 3 (1-5)                    |                                 | 1 (1-1)                            |                                         | 3 (1-5)              |                           | 1 (1-1)                      |                                   |
| 2011 | Austria             | 4 (3-4)                   |                                | 1 (1-1)                           |                                        | 1 (1-2)                    |                                 | 0 (0-1)                            |                                         | 1 (1-2)              |                           | 0 (0-1)                      |                                   |
| 2012 | Austria             | 3 (2-3)                   |                                | 1 (1-1)                           |                                        | 3 (1-5)                    |                                 | 1 (1-1)                            |                                         | 2 (1-4)              |                           | 1 (1-1)                      |                                   |
| 2013 | Austria             | 1 (1-1)                   |                                | 0 (0-0)                           |                                        | 3 (1-5)                    |                                 | 1 (1-1)                            |                                         | 3 (1-5)              |                           | 1 (1-1)                      |                                   |
| 2014 | Austria             | 2 (1-2)                   |                                | 1 (0-1)                           |                                        | 1 (1-2)                    |                                 | 0 (0-0)                            |                                         | 1 (1-1)              |                           | 0 (0-0)                      |                                   |
| 2015 | Austria             | 2 (1-2)                   | 0 (0-0)                        | 0 (0-0)                           | 0 (0-0)                                | 2 (1-4)                    | 0 (0-0)                         | 0 (1-1)                            | 0 (0-0)                                 | 2 (1-3)              | 0 (0-0)                   | 0 (1-1)                      | 0 (0-0)                           |
| 2000 | Azerbaijan          | 559 (397-583)             |                                | 81 (58-85)                        |                                        | 67 (19-159)                |                                 | 10 (3-23)                          |                                         | 60 (17-142)          |                           | 9 (2-21)                     |                                   |
| 2001 | Azerbaijan          | 485 (344-506)             |                                | 75 (53-78)                        |                                        | 57 (16-135)                |                                 | 9 (3-21)                           |                                         | 51 (15-120)          |                           | 8 (2-19)                     |                                   |
| 2002 | Azerbaijan          | 429 (305-448)             |                                | 69 (49-72)                        |                                        | 49 (14-116)                |                                 | 8 (2-19)                           |                                         | 44 (13-103)          |                           | 7 (2-17)                     |                                   |
| 2003 | Azerbaijan          | 388 (275-405)             |                                | 64 (45-66)                        |                                        | 45 (13-102)                |                                 | 7 (2-17)                           |                                         | 38 (11-90)           |                           | 6 (2-15)                     |                                   |
| 2004 | Azerbaijan          | 361 (256-376)             |                                | 60 (42-62)                        |                                        | 39 (12-91)                 |                                 | 6 (2-15)                           |                                         | 34 (10-81)           |                           | 6 (2-13)                     |                                   |
| 2005 | Azerbaijan          | 337 (239-351)             |                                | 56 (40-58)                        |                                        | 35 (10-81)                 |                                 | 6 (2-13)                           |                                         | 31 (9-72)            |                           | 5 (2-12)                     |                                   |
| 2006 | Azerbaijan          | 321 (228-335)             |                                | 52 (37-55)                        |                                        | 32 (10-73)                 |                                 | 5 (2-12)                           |                                         | 28 (8-65)            |                           | 5 (1-11)                     |                                   |
| 2007 | Azerbaijan          | 305 (217-318)             |                                | 49 (35-51)                        |                                        | 29 (9-67)                  |                                 | 5 (1-11)                           |                                         | 26 (8-59)            |                           | 4 (1-10)                     |                                   |
| 2008 | Azerbaijan          | 295 (209-307)             |                                | 46 (33-48)                        |                                        | 27 (8-62)                  |                                 | 4 (1-10)                           |                                         | 24 (7-55)            |                           | 4 (1-9)                      |                                   |
| 2009 | Azerbaijan          | 288 (204-300)             |                                | 43 (31-45)                        |                                        | 26 (8-59)                  |                                 | 4 (1-9)                            |                                         | 23 (7-53)            |                           | 3 (1-8)                      |                                   |
| 2010 | Azerbaijan          | 288 (204-300)             |                                | 41 (29-43)                        |                                        | 25 (8-58)                  |                                 | 4 (1-9)                            |                                         | 23 (7-52)            |                           | 3 (1-8)                      |                                   |
| 2011 | Azerbaijan          | 294 (209-307)             |                                | 40 (28-42)                        |                                        | 26 (8-59)                  |                                 | 4 (1-8)                            |                                         | 23 (7-53)            |                           | 3 (1-7)                      |                                   |
| 2012 | Azerbaijan          | 303 (215-316)             |                                | 39 (27-40)                        |                                        | 27 (8-61)                  |                                 | 3 (1-8)                            |                                         | 24 (8-54)            |                           | 3 (1-7)                      |                                   |
| 2013 | Azerbaijan          | 313 (222-326)             |                                | 37 (26-39)                        |                                        | 27 (9-62)                  |                                 | 3 (1-7)                            |                                         | 24 (8-56)            |                           | 3 (1-7)                      |                                   |
| 2014 | Azerbaijan          | 230 (163-240)             |                                | 26 (18-27)                        |                                        | 19 (6-44)                  |                                 | 2 (1-5)                            |                                         | 17 (6-39)            |                           | 2 (1-4)                      |                                   |

Spn = *Streptococcus pneumoniae*; npnm = non-pneumonia, non-meningitis; HIV = deaths only in HIV-infected children; Uncertainty range provided in parentheses.

| Year | Country    | Spn pneumonia deaths (UR) | Spn pneumonia deaths, HIV (UR) | Spn pneumonia mortality rate (UR) | Spn pneumonia mortality rate, HIV (UR) | Spn meningitis deaths (UR) | Spn meningitis deaths, HIV (UR) | Spn meningitis mortality rate (UR) | Spn meningitis mortality rate, HIV (UR) | Spn NPNM deaths (UR) | Spn NPNM deaths, HIV (UR) | Spn NPNM mortality rate (UR) | Spn NPNM mortality rate, HIV (UR) |
|------|------------|---------------------------|--------------------------------|-----------------------------------|----------------------------------------|----------------------------|---------------------------------|------------------------------------|-----------------------------------------|----------------------|---------------------------|------------------------------|-----------------------------------|
| 2015 | Azerbaijan | 163 (116-170)             |                                | 1 (0-1)                           | 18 (13-19)                             | 0 (0-0)                    |                                 | 14 (4-31)                          | 0 (0-0)                                 | 12 (4-27)            |                           | 1 (0-3)                      | 0 (0-0)                           |
| 2000 | Bahamas    | 4 (3-4)                   |                                |                                   | 15 (11-16)                             |                            |                                 | 0 (0-1)                            |                                         | 0 (0-1)              |                           |                              | 1 (1-2)                           |
| 2001 | Bahamas    | 3 (2-4)                   |                                |                                   | 13 (9-14)                              |                            |                                 | 1 (0-1)                            |                                         | 0 (0-1)              |                           |                              | 2 (1-3)                           |
| 2002 | Bahamas    | 3 (2-3)                   |                                |                                   | 11 (8-11)                              |                            |                                 | 1 (0-1)                            |                                         | 0 (0-1)              |                           |                              | 2 (1-3)                           |
| 2003 | Bahamas    | 2 (1-2)                   |                                |                                   | 6 (4-6)                                |                            |                                 | 0 (0-0)                            |                                         | 0 (0-0)              |                           |                              | 1 (0-1)                           |
| 2004 | Bahamas    | 1 (1-1)                   |                                |                                   | 5 (4-6)                                |                            |                                 | 0 (0-0)                            |                                         | 0 (0-0)              |                           |                              | 1 (0-1)                           |
| 2005 | Bahamas    | 2 (1-2)                   |                                |                                   | 6 (4-7)                                |                            |                                 | 0 (0-0)                            |                                         | 0 (0-0)              |                           |                              | 1 (0-1)                           |
| 2006 | Bahamas    | 2 (1-2)                   |                                |                                   | 7 (5-8)                                |                            |                                 | 0 (0-0)                            |                                         | 0 (0-0)              |                           |                              | 1 (0-1)                           |
| 2007 | Bahamas    | 3 (2-3)                   |                                |                                   | 11 (8-11)                              |                            |                                 | 0 (0-0)                            |                                         | 0 (0-0)              |                           |                              | 0 (0-0)                           |
| 2008 | Bahamas    | 4 (3-4)                   |                                |                                   | 14 (10-15)                             |                            |                                 | 0 (0-0)                            |                                         | 0 (0-0)              |                           |                              | 0 (0-0)                           |
| 2009 | Bahamas    | 4 (3-4)                   |                                |                                   | 15 (11-16)                             |                            |                                 | 0 (0-0)                            |                                         | 1 (1-2)              |                           |                              | 1 (0-2)                           |
| 2010 | Bahamas    | 3 (2-3)                   |                                |                                   | 12 (9-13)                              |                            |                                 | 0 (0-0)                            |                                         | 1 (1-2)              |                           |                              | 1 (1-2)                           |
| 2011 | Bahamas    | 3 (2-3)                   |                                |                                   | 11 (8-12)                              |                            |                                 | 0 (0-0)                            |                                         | 0 (0-0)              |                           |                              | 1 (0-1)                           |
| 2012 | Bahamas    | 3 (2-3)                   |                                |                                   | 10 (7-10)                              |                            |                                 | 0 (0-0)                            |                                         | 0 (0-0)              |                           |                              | 0 (0-0)                           |
| 2013 | Bahamas    | 2 (1-2)                   |                                |                                   | 6 (5-7)                                |                            |                                 | 0 (0-0)                            |                                         | 0 (0-0)              |                           |                              | 0 (0-0)                           |
| 2014 | Bahamas    | 1 (1-1)                   |                                |                                   | 4 (3-4)                                |                            |                                 | 0 (0-0)                            |                                         | 0 (0-0)              |                           |                              | 0 (0-1)                           |
| 2015 | Bahamas    | 1 (1-1)                   | 0 (0-0)                        |                                   | 3 (2-3)                                | 0 (0-0)                    |                                 | 0 (0-0)                            | 0 (0-0)                                 | 0 (0-0)              | 0 (0-0)                   |                              | 0 (0-0)                           |
| 2000 | Bahrain    | 1 (1-1)                   |                                |                                   | 2 (1-2)                                |                            |                                 | 0 (0-1)                            |                                         | 1 (0-1)              |                           |                              | 1 (0-1)                           |
| 2001 | Bahrain    | 3 (2-3)                   |                                |                                   | 4 (3-4)                                |                            |                                 | 0 (0-0)                            |                                         | 0 (0-1)              |                           |                              | 0 (0-1)                           |
| 2002 | Bahrain    | 3 (2-3)                   |                                |                                   | 4 (3-4)                                |                            |                                 | 1 (1-1)                            |                                         | 1 (1-1)              |                           |                              | 1 (1-2)                           |
| 2003 | Bahrain    | 3 (2-3)                   |                                |                                   | 5 (3-5)                                |                            |                                 | 1 (0-1)                            |                                         | 1 (0-1)              |                           |                              | 1 (1-1)                           |
| 2004 | Bahrain    | 2 (2-3)                   |                                |                                   | 3 (2-3)                                |                            |                                 | 1 (1-2)                            |                                         | 1 (1-2)              |                           |                              | 2 (1-2)                           |
| 2005 | Bahrain    | 2 (2-3)                   |                                |                                   | 3 (2-3)                                |                            |                                 | 1 (1-2)                            |                                         | 1 (1-2)              |                           |                              | 1 (1-2)                           |
| 2006 | Bahrain    | 3 (2-3)                   |                                |                                   | 3 (2-4)                                |                            |                                 | 3 (2-4)                            |                                         | 3 (2-4)              |                           |                              | 3 (2-5)                           |
| 2007 | Bahrain    | 3 (2-3)                   |                                |                                   | 4 (3-4)                                |                            |                                 | 3 (2-5)                            |                                         | 2 (1-3)              |                           |                              | 3 (2-4)                           |
| 2008 | Bahrain    | 3 (2-3)                   |                                |                                   | 4 (3-4)                                |                            |                                 | 2 (1-3)                            |                                         | 2 (1-3)              |                           |                              | 2 (1-3)                           |
| 2009 | Bahrain    | 3 (2-3)                   |                                |                                   | 3 (2-3)                                |                            |                                 | 1 (0-1)                            |                                         | 1 (0-1)              |                           |                              | 1 (0-1)                           |
| 2010 | Bahrain    | 2 (1-2)                   |                                |                                   | 2 (1-2)                                |                            |                                 | 0 (0-0)                            |                                         | 0 (0-0)              |                           |                              | 0 (0-0)                           |
| 2011 | Bahrain    | 1 (1-1)                   |                                |                                   | 1 (1-1)                                |                            |                                 | 1 (1-1)                            |                                         | 1 (1-1)              |                           |                              | 1 (1-1)                           |
| 2012 | Bahrain    | 1 (0-1)                   |                                |                                   | 1 (0-1)                                |                            |                                 | 1 (0-1)                            |                                         | 1 (0-1)              |                           |                              | 1 (0-1)                           |
| 2013 | Bahrain    | 0 (0-1)                   |                                |                                   | 0 (0-0)                                |                            |                                 | 1 (0-1)                            |                                         | 1 (0-1)              |                           |                              | 1 (0-1)                           |
| 2014 | Bahrain    | 1 (0-1)                   |                                |                                   | 1 (0-1)                                |                            |                                 | 0 (0-0)                            |                                         | 0 (0-0)              |                           |                              | 0 (0-0)                           |
| 2015 | Bahrain    | 1 (0-1)                   | 0 (0-0)                        |                                   | 0 (0-0)                                | 0 (0-0)                    |                                 | 0 (0-1)                            | 0 (0-0)                                 | 0 (0-1)              | 0 (0-0)                   |                              | 0 (0-1)                           |
| 2000 | Bangladesh | 16671 (11822-17374)       |                                |                                   | 101 (72-105)                           |                            |                                 | 2652 (860-6267)                    |                                         | 16 (5-38)            |                           |                              | 834 (270-1970)                    |
| 2001 | Bangladesh | 15795 (11200-16461)       |                                |                                   | 95 (67-99)                             |                            |                                 | 2484 (795-5897)                    |                                         | 15 (5-36)            |                           |                              | 5 (2-11)                          |
| 2002 | Bangladesh | 14261 (10113-14863)       |                                |                                   | 86 (61-89)                             |                            |                                 | 2216 (700-5283)                    |                                         | 13 (4-32)            |                           |                              | 4 (1-10)                          |
| 2003 | Bangladesh | 13286 (9421-13846)        |                                |                                   | 80 (57-83)                             |                            |                                 | 2040 (516-5033)                    |                                         | 12 (3-30)            |                           |                              | 11 (3-27)                         |
| 2004 | Bangladesh | 12289 (8714-12807)        |                                |                                   | 74 (53-78)                             |                            |                                 | 1967 (465-4617)                    |                                         | 11 (3-28)            |                           |                              | 10 (3-25)                         |
| 2005 | Bangladesh | 11650 (8261-12141)        |                                |                                   | 71 (50-74)                             |                            |                                 | 1754 (456-4286)                    |                                         | 11 (3-28)            |                           |                              | 10 (2-23)                         |
| 2006 | Bangladesh | 10654 (7555-11103)        |                                |                                   | 65 (46-68)                             |                            |                                 | 1588 (432-3848)                    |                                         | 10 (3-24)            |                           |                              | 9 (2-21)                          |
| 2007 | Bangladesh | 9724 (6895-10134)         |                                |                                   | 60 (43-63)                             |                            |                                 | 1436 (417-3427)                    |                                         | 9 (3-21)             |                           |                              | 8 (2-19)                          |
| 2008 | Bangladesh | 8777 (6224-9147)          |                                |                                   | 55 (39-57)                             |                            |                                 | 1282 (370-3053)                    |                                         | 8 (2-19)             |                           |                              | 7 (2-17)                          |
| 2009 | Bangladesh | 7935 (5627-8270)          |                                |                                   | 51 (36-53)                             |                            |                                 | 1145 (328-2725)                    |                                         | 7 (2-17)             |                           |                              | 6 (2-15)                          |
| 2010 | Bangladesh | 7258 (5147-7564)          |                                |                                   | 47 (33-49)                             |                            |                                 | 1032 (295-2458)                    |                                         | 7 (2-16)             |                           |                              | 6 (2-14)                          |
| 2011 | Bangladesh | 6629 (4700-6908)          |                                |                                   | 43 (31-45)                             |                            |                                 | 931 (256-2219)                     |                                         | 6 (2-14)             |                           |                              | 5 (2-13)                          |
| 2012 | Bangladesh | 6123 (4342-6381)          |                                |                                   | 40 (29-42)                             |                            |                                 | 853 (243-2027)                     |                                         | 6 (2-13)             |                           |                              | 5 (1-12)                          |
| 2013 | Bangladesh | 5655 (4010-5893)          |                                |                                   | 37 (26-39)                             |                            |                                 | 784 (223-1860)                     |                                         | 5 (1-12)             |                           |                              | 5 (1-11)                          |
| 2014 | Bangladesh | 5273 (3739-5495)          |                                |                                   | 35 (25-36)                             |                            |                                 | 729 (222-1709)                     |                                         | 5 (1-11)             |                           |                              | 4 (1-10)                          |
| 2015 | Bangladesh | 3886 (2755-4049)          | 2 (1-2)                        |                                   | 26 (18-27)                             | 0 (0-0)                    |                                 | 518 (159-1211)                     | 0 (0-1)                                 | 3 (1-8)              | 0 (0-0)                   |                              | 3 (1-7)                           |
| 2000 | Barbados   | 0 (0-0)                   |                                |                                   | 0 (0-0)                                |                            |                                 | 1 (0-1)                            |                                         | 4 (2-6)              |                           |                              | 4 (2-6)                           |
| 2001 | Barbados   | 0 (0-0)                   |                                |                                   | 2 (1-2)                                |                            |                                 | 0 (0-1)                            |                                         | 3 (1-4)              |                           |                              | 3 (1-4)                           |
| 2002 | Barbados   | 1 (0-1)                   |                                |                                   | 4 (3-4)                                |                            |                                 | 0 (0-1)                            |                                         | 2 (1-4)              |                           |                              | 2 (1-3)                           |
| 2003 | Barbados   | 1 (0-1)                   |                                |                                   | 4 (3-4)                                |                            |                                 | 0 (0-0)                            |                                         | 0 (0-0)              |                           |                              | 0 (0-0)                           |
| 2004 | Barbados   | 1 (1-1)                   |                                |                                   | 5 (3-5)                                |                            |                                 | 0 (0-0)                            |                                         | 0 (0-0)              |                           |                              | 0 (0-0)                           |
| 2005 | Barbados   | 1 (1-1)                   |                                |                                   | 6 (4-6)                                |                            |                                 | 0 (0-0)                            |                                         | 0 (0-0)              |                           |                              | 0 (0-0)                           |
| 2006 | Barbados   | 2 (1-2)                   |                                |                                   | 9 (7-10)                               |                            |                                 | 0 (0-0)                            |                                         | 0 (0-0)              |                           |                              | 0 (0-0)                           |
| 2007 | Barbados   | 1 (1-1)                   |                                |                                   | 6 (5-8)                                |                            |                                 | 0 (0-0)                            |                                         | 0 (0-0)              |                           |                              | 0 (0-0)                           |
| 2008 | Barbados   | 1 (0-1)                   |                                |                                   | 5 (4-5)                                |                            |                                 | 0 (0-0)                            |                                         | 0 (0-0)              |                           |                              | 0 (0-0)                           |
| 2009 | Barbados   | 0 (0-0)                   |                                |                                   | 2 (1-2)                                |                            |                                 | 0 (0-0)                            |                                         | 0 (0-0)              |                           |                              | 0 (0-0)                           |
| 2010 | Barbados   | 0 (0-0)                   |                                |                                   | 3 (2-3)                                |                            |                                 | 0 (0-0)                            |                                         | 0 (0-0)              |                           |                              | 0 (0-0)                           |
| 2011 | Barbados   | 0 (0-0)                   |                                |                                   | 2 (2-2)                                |                            |                                 | 0 (0-0)                            |                                         | 0 (0-0)              |                           |                              | 0 (0-0)                           |
| 2012 | Barbados   | 0 (0-0)                   |                                |                                   | 3 (2-3)                                |                            |                                 | 0 (0-0)                            |                                         | 0 (0-0)              |                           |                              | 0 (0-0)                           |
| 2013 | Barbados   | 0 (0-0)                   |                                |                                   | 1 (1-1)                                |                            |                                 | 0 (0-0)                            |                                         | 0 (0-0)              |                           |                              | 0 (0-0)                           |
| 2014 | Barbados   | 0 (0-0)                   |                                |                                   | 1 (1-1)                                |                            |                                 | 0 (0-0)                            |                                         | 0 (0-0)              |                           |                              | 0 (0-0)                           |
| 2015 | Barbados   | 0 (0-0)                   | 0 (0-0)                        |                                   | 1 (1-1)                                | 0 (0-0)                    |                                 | 0 (0-0)                            | 0 (0-0)                                 | 0 (0-0)              | 0 (0-0)                   |                              | 0 (0-0)                           |
| 2000 | Belarus    | 45 (32-47)                |                                |                                   | 10 (7-10)                              |                            |                                 | 4 (2-13)                           |                                         | 1 (0-3)              |                           |                              | 4 (1-12)                          |
| 2001 | Belarus    | 39 (28-41)                |                                |                                   | 9 (6-9)                                |                            |                                 | 4 (1-12)                           |                                         | 1 (0-3)              |                           |                              | 1 (0-2)                           |
| 2002 | Belarus    | 35 (25-36)                |                                |                                   | 8 (6-8)                                |                            |                                 | 3 (1-10)                           |                                         | 1 (0-2)              |                           |                              | 1 (0-2)                           |
| 2003 | Belarus    | 31 (22-32)                |                                |                                   | 7 (5-7)                                |                            |                                 | 3 (1-9)                            |                                         | 1 (0-2)              |                           |                              | 1 (0-2)                           |
| 2004 | Belarus    | 29 (21-30)                |                                |                                   | 7 (5-7)                                |                            |                                 | 3 (1-9)                            |                                         | 1 (0-2)              |                           |                              | 1 (0-2)                           |
| 2005 | Belarus    | 26 (18-27)                |                                |                                   | 6 (4-6)                                |                            |                                 | 3 (1-8)                            |                                         | 2 (1-7)              |                           |                              | 1 (0-2)                           |
| 2006 | Belarus    | 24 (17-25)                |                                |                                   | 5 (4-5)                                |                            |                                 | 3 (1-7)                            |                                         | 1 (0-2)              |                           |                              | 1 (0-1)                           |
| 2007 | Belarus    | 21 (15-22)                |                                |                                   | 5 (3-5)                                |                            |                                 | 2 (1-7)                            |                                         | 1 (0-1)              |                           |                              | 0 (0-1)                           |
| 2008 | Belarus    | 18 (13-19)                |                                |                                   | 4 (3-4)                                |                            |                                 | 2 (1-7)                            |                                         | 1 (0-1)              |                           |                              | 0 (0-1)                           |
| 2009 | Belarus    | 17 (12-18)                |                                |                                   | 4 (3-4)                                |                            |                                 | 3 (1-7)                            |                                         | 1 (0-1)              |                           |                              | 0 (0-1)                           |
| 2010 | Belarus    | 15 (11-16)                |                                |                                   | 3 (2-3)                                |                            |                                 | 2 (1-5)                            |                                         | 0 (0-1)              |                           |                              | 0 (0-1)                           |
| 2011 | Belarus    | 13 (9-13)                 |                                |                                   | 2 (2-3)                                |                            |                                 | 2 (1-5)                            |                                         | 0 (0-1)              |                           |                              | 0 (0-1)                           |
| 2012 | Belarus    | 13 (9-13)                 |                                |                                   | 2 (2-2)                                |                            |                                 | 2 (1-5)                            |                                         | 0 (0-1)              |                           |                              | 0 (0-1)                           |
| 2013 | Belarus    | 12 (9-13)                 |                                |                                   | 2 (2-2)                                |                            |                                 | 2 (1-5)                            |                                         | 0 (0-1)              |                           |                              | 0 (0-1)                           |
| 2014 | Belarus    | 11 (8-11)                 |                                |                                   | 2 (1-2)                                |                            |                                 | 2 (1-4)                            |                                         | 0 (0-1)              |                           |                              | 0 (0-1)                           |
| 2015 | Belarus    | 10 (7-11)                 | 0 (0-0)                        |                                   | 2 (1-2)                                | 0 (0-0)                    |                                 | 2 (1-4)                            | 0 (0-0)                                 | 1 (1-3)              | 0 (0-0)                   |                              | 0 (0-1)                           |
| 2000 | Belgium    | 3 (2-3)                   |                                |                                   | 0 (0-0)                                |                            |                                 | 10 (4-17)                          |                                         | 2 (1-3)              |                           |                              | 2 (1-3)                           |
| 2001 | Belgium    | 2 (2-2)                   |                                |                                   | 0 (0-0)                                |                            |                                 | 12 (5-22)                          |                                         | 2 (1-4)              |                           |                              | 2 (1-3)                           |
| 2002 | Belgium    | 8 (5-8)                   |                                |                                   | 1 (1-1)                                |                            |                                 | 8 (4-15)                           |                                         | 1 (1-3)              |                           |                              | 7 (3-13)                          |
| 2003 | Belgium    | 4 (3-4)                   |                                |                                   | 1 (1-1)                                |                            |                                 | 8 (4-15)                           |                                         | 1 (1-3)              |                           |                              | 1 (1-2)                           |
| 2004 | Belgium    | 2 (2-3)                   |                                |                                   | 0 (0-0)                                |                            |                                 | 11 (5-19)                          |                                         | 2 (1-3)              |                           |                              | 2 (1-3)                           |
| 2005 | Belgium    | 8 (5-8)                   |                                |                                   | 1 (1-1)                                |                            |                                 | 9 (4-16)                           |                                         | 2 (1-3)              |                           |                              | 1 (1-2)                           |
| 2006 | Belgium    | 3 (2-3)                   |                                |                                   | 1 (0-1)                                |                            |                                 | 10 (4-18)                          |                                         | 2 (1-3)              |                           |                              | 1 (1-3)                           |

Spn = *Streptococcus pneumoniae*; npnm = non-pneumonia, non-meningitis; HIV = deaths only in HIV-infected children; Uncertainty range provided in parentheses.

| Year | Country                          | Spn pneumonia deaths (UR) | Spn pneumonia deaths, HIV (UR) | Spn pneumonia mortality rate (UR) | Spn pneumonia mortality rate, HIV (UR) | Spn meningitis deaths (UR) | Spn meningitis deaths, HIV (UR) | Spn meningitis mortality rate (UR) | Spn meningitis mortality rate, HIV (UR) | Spn NPNM deaths (UR) | Spn NPNM deaths, HIV (UR) | Spn NPNM mortality rate (UR) | Spn NPNM mortality rate, HIV (UR) |
|------|----------------------------------|---------------------------|--------------------------------|-----------------------------------|----------------------------------------|----------------------------|---------------------------------|------------------------------------|-----------------------------------------|----------------------|---------------------------|------------------------------|-----------------------------------|
| 2007 | Belgium                          | 7 (5-8)                   |                                | 1 (1-1)                           |                                        | 9 (4-16)                   |                                 | 1 (1-3)                            |                                         | 8 (3-14)             |                           | 1 (1-2)                      |                                   |
| 2008 | Belgium                          | 4 (3-4)                   |                                | 1 (0-1)                           |                                        | 6 (3-11)                   |                                 | 1 (0-2)                            |                                         | 5 (2-10)             |                           | 1 (0-2)                      |                                   |
| 2009 | Belgium                          | 6 (4-6)                   |                                | 1 (1-1)                           |                                        | 6 (3-11)                   |                                 | 1 (0-2)                            |                                         | 5 (2-10)             |                           | 1 (0-2)                      |                                   |
| 2010 | Belgium                          | 6 (4-6)                   |                                | 1 (1-1)                           |                                        | 3 (1-5)                    |                                 | 0 (0-1)                            |                                         | 2 (1-4)              |                           | 0 (0-1)                      |                                   |
| 2011 | Belgium                          | 4 (3-4)                   |                                | 1 (0-1)                           |                                        | 4 (2-6)                    |                                 | 1 (0-1)                            |                                         | 3 (1-6)              |                           | 0 (0-1)                      |                                   |
| 2012 | Belgium                          | 0 (0-0)                   |                                | 0 (0-0)                           |                                        | 3 (1-6)                    |                                 | 0 (0-1)                            |                                         | 3 (1-5)              |                           | 0 (0-1)                      |                                   |
| 2013 | Belgium                          | 2 (1-2)                   |                                | 0 (0-0)                           |                                        | 2 (1-3)                    |                                 | 0 (0-1)                            |                                         | 2 (1-3)              |                           | 0 (0-0)                      |                                   |
| 2014 | Belgium                          | 2 (1-2)                   |                                | 0 (0-0)                           |                                        | 2 (1-3)                    |                                 | 0 (0-0)                            |                                         | 1 (1-3)              |                           | 0 (0-0)                      |                                   |
| 2015 | Belgium                          | 1 (1-1)                   | 0 (0-0)                        | 0 (0-0)                           | 0 (0-0)                                | 1 (1-3)                    | 0 (0-0)                         | 0 (0-0)                            | 0 (0-0)                                 | 1 (1-2)              | 0 (0-0)                   | 0 (0-0)                      | 0 (0-0)                           |
| 2000 | Belize                           | 8 (6-8)                   |                                | 22 (15-22)                        |                                        | 1 (0-5)                    |                                 | 4 (1-13)                           |                                         | 1 (0-4)              |                           | 4 (1-11)                     |                                   |
| 2001 | Belize                           | 7 (5-7)                   |                                | 19 (13-20)                        |                                        | 2 (0-8)                    |                                 | 7 (1-21)                           |                                         | 2 (0-7)              |                           | 6 (1-18)                     |                                   |
| 2002 | Belize                           | 11 (9-12)                 |                                | 30 (22-32)                        |                                        | 4 (1-11)                   |                                 | 10 (2-30)                          |                                         | 3 (1-10)             |                           | 9 (2-27)                     |                                   |
| 2003 | Belize                           | 9 (6-9)                   |                                | 24 (17-25)                        |                                        | 1 (0-3)                    |                                 | 2 (0-7)                            |                                         | 1 (0-2)              |                           | 2 (0-6)                      |                                   |
| 2004 | Belize                           | 9 (6-9)                   |                                | 24 (17-25)                        |                                        | 2 (0-6)                    |                                 | 5 (1-16)                           |                                         | 2 (0-5)              |                           | 5 (1-14)                     |                                   |
| 2005 | Belize                           | 5 (3-5)                   |                                | 13 (9-13)                         |                                        | 0 (0-0)                    |                                 | 0 (0-0)                            |                                         | 0 (0-0)              |                           | 0 (0-0)                      |                                   |
| 2006 | Belize                           | 9 (7-10)                  |                                | 25 (18-26)                        |                                        | 0 (0-1)                    |                                 | 1 (0-4)                            |                                         | 0 (0-1)              |                           | 1 (0-3)                      |                                   |
| 2007 | Belize                           | 2 (1-2)                   |                                | 5 (3-5)                           |                                        | 1 (0-3)                    |                                 | 3 (1-9)                            |                                         | 1 (0-3)              |                           | 3 (1-8)                      |                                   |
| 2008 | Belize                           | 3 (2-3)                   |                                | 7 (5-7)                           |                                        | 0 (0-0)                    |                                 | 0 (0-0)                            |                                         | 0 (0-0)              |                           | 0 (0-0)                      |                                   |
| 2009 | Belize                           | 3 (2-3)                   |                                | 8 (6-8)                           |                                        | 0 (0-0)                    |                                 | 0 (0-0)                            |                                         | 0 (0-0)              |                           | 0 (0-0)                      |                                   |
| 2010 | Belize                           | 4 (3-4)                   |                                | 11 (7-11)                         |                                        | 1 (0-2)                    |                                 | 2 (1-5)                            |                                         | 1 (0-2)              |                           | 2 (1-5)                      |                                   |
| 2011 | Belize                           | 1 (1-1)                   |                                | 2 (1-2)                           |                                        | 0 (0-0)                    |                                 | 0 (0-0)                            |                                         | 0 (0-0)              |                           | 0 (0-0)                      |                                   |
| 2012 | Belize                           | 8 (6-9)                   |                                | 22 (16-23)                        |                                        | 1 (0-2)                    |                                 | 2 (1-6)                            |                                         | 1 (0-2)              |                           | 2 (1-5)                      |                                   |
| 2013 | Belize                           | 3 (2-3)                   |                                | 8 (5-8)                           |                                        | 2 (1-4)                    |                                 | 5 (2-12)                           |                                         | 2 (1-4)              |                           | 4 (2-10)                     |                                   |
| 2014 | Belize                           | 4 (3-4)                   |                                | 10 (7-11)                         |                                        | 1 (0-2)                    |                                 | 3 (1-6)                            |                                         | 1 (0-2)              |                           | 2 (1-5)                      |                                   |
| 2015 | Belize                           | 4 (3-4)                   | 0 (0-0)                        | 10 (7-11)                         | 0 (0-0)                                | 1 (0-2)                    | 0 (0-0)                         | 1 (0-2)                            | 0 (0-0)                                 | 1 (0-2)              | 0 (0-0)                   | 2 (1-5)                      | 0 (0-0)                           |
| 2000 | Benin                            | 2211 (1568-2304)          |                                | 181 (128-188)                     |                                        | 381 (139-946)              |                                 | 311 (11-659)                       |                                         | 120 (44-266)         |                           | 10 (4-22)                    |                                   |
| 2001 | Benin                            | 2164 (1535-2256)          |                                | 172 (122-179)                     |                                        | 371 (136-823)              |                                 | 30 (11-65)                         |                                         | 117 (43-259)         |                           | 9 (3-21)                     |                                   |
| 2002 | Benin                            | 2148 (1523-2239)          |                                | 166 (118-173)                     |                                        | 367 (135-813)              |                                 | 28 (10-63)                         |                                         | 115 (42-256)         |                           | 9 (3-20)                     |                                   |
| 2003 | Benin                            | 2122 (1505-2211)          |                                | 160 (113-167)                     |                                        | 361 (133-800)              |                                 | 27 (10-60)                         |                                         | 114 (42-252)         |                           | 9 (3-19)                     |                                   |
| 2004 | Benin                            | 2086 (1479-2174)          |                                | 153 (109-160)                     |                                        | 355 (131-785)              |                                 | 26 (10-58)                         |                                         | 111 (41-247)         |                           | 8 (3-18)                     |                                   |
| 2005 | Benin                            | 2057 (1459-2144)          |                                | 148 (105-154)                     |                                        | 349 (129-773)              |                                 | 25 (9-55)                          |                                         | 110 (41-243)         |                           | 8 (3-17)                     |                                   |
| 2006 | Benin                            | 2107 (1494-2196)          |                                | 147 (104-153)                     |                                        | 357 (132-798)              |                                 | 25 (9-55)                          |                                         | 112 (42-248)         |                           | 8 (3-17)                     |                                   |
| 2007 | Benin                            | 2136 (1515-2226)          |                                | 146 (103-152)                     |                                        | 361 (133-802)              |                                 | 25 (9-55)                          |                                         | 114 (42-252)         |                           | 8 (3-17)                     |                                   |
| 2008 | Benin                            | 2188 (1552-2280)          |                                | 147 (104-153)                     |                                        | 369 (134-821)              |                                 | 25 (9-55)                          |                                         | 116 (42-258)         |                           | 8 (3-17)                     |                                   |
| 2009 | Benin                            | 2245 (1592-2340)          |                                | 148 (105-154)                     |                                        | 378 (137-843)              |                                 | 25 (9-55)                          |                                         | 119 (43-265)         |                           | 8 (3-17)                     |                                   |
| 2010 | Benin                            | 2294 (1627-2390)          |                                | 148 (105-155)                     |                                        | 385 (138-861)              |                                 | 25 (9-56)                          |                                         | 121 (43-271)         |                           | 8 (3-17)                     |                                   |
| 2011 | Benin                            | 2014 (1428-2099)          |                                | 128 (91-133)                      |                                        | 330 (117-739)              |                                 | 21 (7-47)                          |                                         | 104 (37-232)         |                           | 7 (2-15)                     |                                   |
| 2012 | Benin                            | 1539 (1091-1604)          |                                | 96 (68-100)                       |                                        | 242 (86-544)               |                                 | 15 (5-34)                          |                                         | 76 (27-171)          |                           | 5 (2-11)                     |                                   |
| 2013 | Benin                            | 1464 (1038-1525)          |                                | 90 (64-94)                        |                                        | 235 (84-527)               |                                 | 14 (5-32)                          |                                         | 74 (26-166)          |                           | 5 (2-10)                     |                                   |
| 2014 | Benin                            | 1369 (971-1427)           |                                | 83 (59-86)                        |                                        | 224 (80-501)               |                                 | 14 (5-30)                          |                                         | 70 (25-157)          |                           | 4 (2-10)                     |                                   |
| 2015 | Benin                            | 898 (637-936)             | 47 (33-49)                     | 53 (38-56)                        | 3 (2-3)                                | 138 (49-308)               | 7 (3-16)                        | 8 (3-18)                           | 0 (0-1)                                 | 43 (16-97)           | 2 (1-5)                   | 3 (1-6)                      | 0 (0-0)                           |
| 2000 | Bhutan                           | 78 (55-81)                |                                | 105 (74-109)                      |                                        | 11 (5-22)                  |                                 | 14 (6-29)                          |                                         | 3 (1-7)              |                           | 5 (2-9)                      |                                   |
| 2001 | Bhutan                           | 71 (50-74)                |                                | 96 (68-100)                       |                                        | 10 (4-19)                  |                                 | 13 (6-26)                          |                                         | 3 (1-6)              |                           | 4 (2-8)                      |                                   |
| 2002 | Bhutan                           | 64 (46-67)                |                                | 89 (63-92)                        |                                        | 9 (3-18)                   |                                 | 12 (5-25)                          |                                         | 8 (3-16)             |                           | 11 (4-22)                    |                                   |
| 2003 | Bhutan                           | 58 (41-60)                |                                | 81 (57-84)                        |                                        | 8 (3-16)                   |                                 | 11 (4-22)                          |                                         | 7 (3-14)             |                           | 10 (4-20)                    |                                   |
| 2004 | Bhutan                           | 52 (37-54)                |                                | 73 (52-76)                        |                                        | 7 (3-14)                   |                                 | 10 (4-20)                          |                                         | 6 (2-13)             |                           | 9 (3-18)                     |                                   |
| 2005 | Bhutan                           | 47 (34-49)                |                                | 67 (48-70)                        |                                        | 6 (3-13)                   |                                 | 9 (4-18)                           |                                         | 5 (2-11)             |                           | 8 (3-16)                     |                                   |
| 2006 | Bhutan                           | 43 (31-45)                |                                | 62 (44-64)                        |                                        | 6 (2-11)                   |                                 | 8 (3-16)                           |                                         | 5 (2-10)             |                           | 7 (3-14)                     |                                   |
| 2007 | Bhutan                           | 40 (28-42)                |                                | 57 (40-59)                        |                                        | 5 (2-10)                   |                                 | 7 (3-15)                           |                                         | 5 (2-9)              |                           | 6 (3-13)                     |                                   |
| 2008 | Bhutan                           | 37 (26-38)                |                                | 52 (37-54)                        |                                        | 5 (2-9)                    |                                 | 7 (3-13)                           |                                         | 4 (2-8)              |                           | 6 (2-12)                     |                                   |
| 2009 | Bhutan                           | 34 (24-35)                |                                | 47 (34-49)                        |                                        | 4 (2-8)                    |                                 | 6 (3-12)                           |                                         | 4 (2-7)              |                           | 5 (2-10)                     |                                   |
| 2010 | Bhutan                           | 31 (22-32)                |                                | 43 (31-45)                        |                                        | 4 (2-7)                    |                                 | 5 (2-11)                           |                                         | 3 (1-7)              |                           | 5 (2-9)                      |                                   |
| 2011 | Bhutan                           | 28 (20-29)                |                                | 39 (28-41)                        |                                        | 3 (1-7)                    |                                 | 5 (2-9)                            |                                         | 3 (1-6)              |                           | 4 (2-8)                      |                                   |
| 2012 | Bhutan                           | 25 (18-26)                |                                | 36 (25-37)                        |                                        | 3 (1-6)                    |                                 | 4 (2-8)                            |                                         | 3 (1-5)              |                           | 4 (2-8)                      |                                   |
| 2013 | Bhutan                           | 22 (16-23)                |                                | 33 (23-34)                        |                                        | 3 (1-5)                    |                                 | 4 (2-8)                            |                                         | 2 (1-5)              |                           | 4 (2-7)                      |                                   |
| 2014 | Bhutan                           | 20 (14-21)                |                                | 31 (22-32)                        |                                        | 2 (1-5)                    |                                 | 4 (2-7)                            |                                         | 2 (1-4)              |                           | 3 (1-6)                      |                                   |
| 2015 | Bhutan                           | 19 (13-20)                | 1 (0-1)                        | 29 (21-30)                        | 1 (1-1)                                | 2 (1-4)                    | 0 (0-0)                         | 3 (2-7)                            | 0 (0-0)                                 | 2 (1-4)              | 0 (0-0)                   | 3 (1-6)                      | 0 (0-0)                           |
| 2000 | Bolivia (Plurinational State of) | 1187 (841-1237)           |                                | 104 (74-108)                      |                                        | 123 (40-317)               |                                 | 11 (4-28)                          |                                         | 39 (13-100)          |                           | 3 (1-8)                      |                                   |
| 2001 | Bolivia (Plurinational State of) | 1116 (791-1163)           |                                | 97 (69-101)                       |                                        | 116 (38-300)               |                                 | 10 (3-26)                          |                                         | 37 (12-94)           |                           | 3 (1-8)                      |                                   |
| 2002 | Bolivia (Plurinational State of) | 1036 (734-1079)           |                                | 89 (63-93)                        |                                        | 108 (29-289)               |                                 | 9 (2-25)                           |                                         | 96 (26-257)          |                           | 8 (2-22)                     |                                   |
| 2003 | Bolivia (Plurinational State of) | 955 (677-995)             |                                | 82 (58-86)                        |                                        | 99 (26-267)                |                                 | 9 (2-23)                           |                                         | 88 (24-237)          |                           | 8 (2-20)                     |                                   |
| 2004 | Bolivia (Plurinational State of) | 872 (618-908)             |                                | 75 (53-78)                        |                                        | 90 (24-242)                |                                 | 8 (2-21)                           |                                         | 80 (21-216)          |                           | 7 (2-19)                     |                                   |
| 2005 | Bolivia (Plurinational State of) | 801 (568-835)             |                                | 69 (49-72)                        |                                        | 82 (22-221)                |                                 | 7 (2-19)                           |                                         | 73 (19-197)          |                           | 6 (2-17)                     |                                   |
| 2006 | Bolivia (Plurinational State of) | 741 (525-772)             |                                | 64 (45-66)                        |                                        | 75 (20-202)                |                                 | 6 (2-17)                           |                                         | 67 (18-180)          |                           | 6 (2-15)                     |                                   |
| 2007 | Bolivia (Plurinational State of) | 688 (488-717)             |                                | 59 (42-61)                        |                                        | 69 (18-187)                |                                 | 6 (2-16)                           |                                         | 62 (16-166)          |                           | 5 (1-14)                     |                                   |
| 2008 | Bolivia (Plurinational State of) | 650 (461-677)             |                                | 56 (39-58)                        |                                        | 65 (17-175)                |                                 | 6 (1-15)                           |                                         | 58 (15-156)          |                           | 5 (1-13)                     |                                   |
| 2009 | Bolivia (Plurinational State of) | 613 (434-638)             |                                | 52 (37-55)                        |                                        | 62 (20-158)                |                                 | 5 (2-13)                           |                                         | 55 (18-140)          |                           | 5 (2-12)                     |                                   |
| 2010 | Bolivia (Plurinational State of) | 577 (410-602)             |                                | 49 (35-51)                        |                                        | 58 (18-149)                |                                 | 5 (2-13)                           |                                         | 52 (16-132)          |                           | 4 (1-11)                     |                                   |
| 2011 | Bolivia (Plurinational State of) | 542 (384-565)             |                                | 46 (33-48)                        |                                        | 54 (16-140)                |                                 | 5 (1-12)                           |                                         | 48 (14-124)          |                           | 4 (1-11)                     |                                   |
| 2012 | Bolivia (Plurinational State of) | 513 (364-534)             |                                | 44 (31-46)                        |                                        | 51 (15-132)                |                                 | 4 (1-11)                           |                                         | 45 (13-118)          |                           | 4 (1-10)                     |                                   |
| 2013 | Bolivia (Plurinational State of) | 481 (341-501)             |                                | 41 (29-43)                        |                                        | 47 (13-124)                |                                 | 4 (1-11)                           |                                         | 42 (12-110)          |                           | 4 (1-11)                     |                                   |
| 2014 | Bolivia (Plurinational State of) | 351 (249-366)             |                                | 30 (21-31)                        |                                        | 33 (8-89)                  |                                 | 3 (1-8)                            |                                         | 30 (8-79)            |                           | 3 (1-7)                      |                                   |
| 2015 | Bolivia (Plurinational State of) | 245 (174-255)             | 0 (0-0)                        | 21 (15-22)                        | 0 (0-0)                                | 23 (6-62)                  | 0 (0-0)                         | 2 (1-5)                            | 0 (0-0)                                 | 20 (5-55)            | 0 (0-0)                   | 2 (0-5)                      | 0 (0-0)                           |
| 2000 | Bosnia and Herzegovina           | 6 (4-6)                   |                                | 3 (2-3)                           |                                        | 1 (0-2)                    |                                 | 0 (0-1)                            |                                         | 0 (0-1)              |                           | 0 (0-1)                      |                                   |
| 2001 | Bosnia and Herzegovina           | 5 (4-5)                   |                                | 2 (2-3)                           |                                        | 0 (0-2)                    |                                 | 0 (0-1)                            |                                         | 0 (0-1)              |                           | 0 (0-1)                      |                                   |
| 2002 | Bosnia and Herzegovina           | 5 (3-5)                   |                                | 2 (2-2)                           |                                        | 0 (0-1)                    |                                 | 0 (0-1)                            |                                         | 0 (0-1)              |                           | 0 (0-1)                      |                                   |
| 2003 | Bosnia and Herzegovina           | 4 (3-5)                   |                                | 2 (2-3)                           |                                        | 0 (0-1)                    |                                 | 0 (0-1)                            |                                         | 0 (0-1)              |                           | 0 (0-1)                      |                                   |
| 2004 | Bosnia and Herzegovina           | 4 (3-4)                   |                                | 2 (2-3)                           |                                        | 1 (0-2)                    |                                 | 0 (0-1)                            |                                         | 0 (0-1)              |                           | 0 (0-1)                      |                                   |
| 2005 | Bosnia and Herzegovina           | 5 (3-5)                   |                                | 3 (2-3)                           |                                        | 1 (0-2)                    |                                 | 0 (0-1)                            |                                         | 1 (0-2)              |                           | 0 (0-1)                      |                                   |
| 2006 | Bosnia and Herzegovina           | 4 (3-4)                   |                                | 3 (2-3)                           |                                        | 1 (0-2)                    |                                 | 0 (0-1)                            |                                         | 1 (0-2)              |                           | 0 (0-1)                      |                                   |
| 2007 | Bosnia and Herzegovina           | 5 (3-5)                   |                                | 3 (2-3)                           |                                        | 1 (0-2)                    |                                 | 0 (0-1)                            |                                         | 1 (0-2)              |                           | 0 (0-1)                      |                                   |
| 2008 | Bosnia and Herzegovina           | 5 (3-5)                   |                                | 3 (2-3)                           |                                        | 1 (0-2)                    |                                 | 0 (0-1)                            |                                         | 1 (0-2)              |                           | 0 (0-1)                      |                                   |
| 2009 | Bosnia and Herzegovina           | 5 (3-5)                   |                                | 3 (2-3)                           |                                        | 1 (0-2)                    |                                 | 0 (0-1)                            |                                         | 1 (0-2)              |                           | 0 (0-1)                      |                                   |
| 2010 | Bosnia and Herzegovina           | 4 (3-4)                   |                                | 2 (2-2)                           |                                        | 1 (0-2)                    |                                 | 0 (0-1)                            |                                         | 1 (0-2)              |                           | 0 (0-1)                      |                                   |
| 2011 | Bosnia and Herzegovina           | 3 (2-3)                   |                                | 2 (1-2)                           |                                        | 0 (0-1)                    |                                 | 0 (0-1)                            |                                         | 0 (0-1)              |                           | 0 (0-1)                      |                                   |
| 2012 | Bosnia and Herzegovina           | 3 (2-3)                   |                                | 2 (1-2)                           |                                        | 0 (0-1)                    |                                 | 0 (0-1)                            |                                         | 0 (0-1)              |                           | 0 (0-1)                      |                                   |
| 2013 | Bosnia and Herzegovina           | 2 (2-2)                   |                                | 1 (1-1)                           |                                        | 0 (0-1)                    |                                 | 0 (0-1)                            |                                         | 0 (0-1)              |                           | 0 (0-0)                      |                                   |
| 2014 | Bosnia and Herzegovina           | 2 (1-2)                   |                                | 1 (1-1)                           |                                        | 0 (0-1)                    |                                 | 0 (0-0)                            |                                         | 0 (0-1)              |                           | 0 (0-0)                      |                                   |

Spn = *Streptococcus pneumoniae*; npnm = non-pneumonia, non-meningitis; HIV = deaths only in HIV-infected children; Uncertainty range provided in parentheses.



| Year | Country                | Spn pneumonia deaths (UR) | Spn pneumonia deaths, HIV (UR) | Spn pneumonia mortality rate (UR) | Spn pneumonia mortality rate, HIV (UR) | Spn meningitis deaths (UR) | Spn meningitis deaths, HIV (UR) | Spn meningitis mortality rate (UR) | Spn meningitis mortality rate, HIV (UR) | Spn NPNM deaths (UR) | Spn NPNM deaths, HIV (UR) | Spn NPNM mortality rate (UR) | Spn NPNM mortality rate, HIV (UR) |
|------|------------------------|---------------------------|--------------------------------|-----------------------------------|----------------------------------------|----------------------------|---------------------------------|------------------------------------|-----------------------------------------|----------------------|---------------------------|------------------------------|-----------------------------------|
| 2015 | Bosnia and Herzegovina | 2 (1-2)                   | 0 (0-0)                        | 1 (1-1)                           | 0 (0-0)                                | 0 (0-1)                    | 0 (0-0)                         | 0 (0-0)                            | 0 (0-0)                                 | 0 (0-1)              | 0 (0-0)                   | 0 (0-0)                      | 0 (0-0)                           |
| 2000 | Botswana               | 86 (61-89)                |                                | 39 (28-41)                        |                                        | 9 (3-20)                   |                                 | 4 (1-9)                            |                                         | 3 (1-6)              |                           | 1 (0-3)                      |                                   |
| 2001 | Botswana               | 88 (62-92)                |                                | 40 (28-42)                        |                                        | 9 (3-21)                   |                                 | 4 (1-9)                            |                                         | 3 (1-6)              |                           | 1 (0-3)                      |                                   |
| 2002 | Botswana               | 91 (64-95)                |                                | 41 (29-43)                        |                                        | 9 (3-21)                   |                                 | 4 (1-10)                           |                                         | 3 (1-7)              |                           | 1 (0-3)                      |                                   |
| 2003 | Botswana               | 94 (67-98)                |                                | 43 (31-45)                        |                                        | 9 (3-22)                   |                                 | 4 (1-10)                           |                                         | 3 (1-7)              |                           | 1 (0-3)                      |                                   |
| 2004 | Botswana               | 99 (70-103)               |                                | 45 (32-47)                        |                                        | 10 (3-23)                  |                                 | 4 (1-10)                           |                                         | 3 (1-7)              |                           | 1 (0-3)                      |                                   |
| 2005 | Botswana               | 103 (73-108)              |                                | 47 (33-49)                        |                                        | 10 (3-24)                  |                                 | 5 (1-11)                           |                                         | 9 (2-21)             |                           | 4 (1-10)                     |                                   |
| 2006 | Botswana               | 106 (76-111)              |                                | 49 (34-51)                        |                                        | 10 (3-24)                  |                                 | 5 (1-11)                           |                                         | 9 (2-22)             |                           | 4 (1-10)                     |                                   |
| 2007 | Botswana               | 110 (78-115)              |                                | 50 (35-52)                        |                                        | 10 (3-25)                  |                                 | 5 (1-11)                           |                                         | 9 (2-22)             |                           | 4 (1-10)                     |                                   |
| 2008 | Botswana               | 114 (81-118)              |                                | 51 (36-53)                        |                                        | 11 (3-25)                  |                                 | 5 (1-11)                           |                                         | 9 (2-23)             |                           | 4 (1-10)                     |                                   |
| 2009 | Botswana               | 115 (82-120)              |                                | 50 (36-52)                        |                                        | 11 (3-25)                  |                                 | 5 (1-11)                           |                                         | 9 (2-23)             |                           | 4 (1-10)                     |                                   |
| 2010 | Botswana               | 115 (82-120)              |                                | 49 (35-51)                        |                                        | 10 (3-25)                  |                                 | 4 (1-11)                           |                                         | 9 (2-22)             |                           | 4 (1-10)                     |                                   |
| 2011 | Botswana               | 117 (83-122)              |                                | 49 (35-51)                        |                                        | 11 (3-25)                  |                                 | 4 (1-11)                           |                                         | 9 (2-23)             |                           | 4 (1-10)                     |                                   |
| 2012 | Botswana               | 95 (68-99)                |                                | 39 (27-40)                        |                                        | 8 (2-20)                   |                                 | 3 (1-8)                            |                                         | 7 (2-18)             |                           | 3 (1-7)                      |                                   |
| 2013 | Botswana               | 82 (58-85)                |                                | 32 (23-34)                        |                                        | 7 (2-17)                   |                                 | 3 (1-7)                            |                                         | 6 (2-15)             |                           | 2 (1-6)                      |                                   |
| 2014 | Botswana               | 68 (48-71)                |                                | 26 (19-28)                        |                                        | 6 (2-14)                   |                                 | 2 (1-5)                            |                                         | 5 (1-12)             |                           | 2 (1-5)                      |                                   |
| 2015 | Botswana               | 61 (44-64)                | 14 (10-15)                     | 23 (17-24)                        | 5 (4-6)                                | 5 (1-13)                   | 1 (0-3)                         | 2 (1-5)                            | 0 (0-1)                                 | 5 (1-11)             | 1 (0-3)                   | 2 (1-5)                      | 0 (0-1)                           |
| 2000 | Brazil                 | 5337 (3784-5562)          |                                | 31 (22-32)                        |                                        | 1139 (280-3197)            |                                 | 7 (2-18)                           |                                         | 1014 (249-2846)      |                           | 6 (1-16)                     |                                   |
| 2001 | Brazil                 | 4715 (3344-4914)          |                                | 27 (19-28)                        |                                        | 1044 (170-3499)            |                                 | 6 (1-20)                           |                                         | 929 (152-3115)       |                           | 5 (1-16)                     |                                   |
| 2002 | Brazil                 | 4095 (2904-4268)          |                                | 23 (16-24)                        |                                        | 815 (135-2727)             |                                 | 5 (1-15)                           |                                         | 726 (120-2427)       |                           | 4 (1-14)                     |                                   |
| 2003 | Brazil                 | 3735 (2648-3892)          |                                | 21 (15-22)                        |                                        | 682 (115-2275)             |                                 | 4 (1-13)                           |                                         | 607 (102-2025)       |                           | 3 (1-11)                     |                                   |
| 2004 | Brazil                 | 3412 (2419-3555)          |                                | 20 (14-20)                        |                                        | 641 (109-2130)             |                                 | 4 (1-12)                           |                                         | 570 (97-1897)        |                           | 3 (1-11)                     |                                   |
| 2005 | Brazil                 | 2877 (2040-2999)          |                                | 17 (12-17)                        |                                        | 604 (105-2000)             |                                 | 4 (1-12)                           |                                         | 537 (93-1781)        |                           | 3 (1-10)                     |                                   |
| 2006 | Brazil                 | 2612 (1852-2722)          |                                | 15 (11-16)                        |                                        | 570 (100-1883)             |                                 | 3 (1-11)                           |                                         | 508 (89-1677)        |                           | 3 (1-10)                     |                                   |
| 2007 | Brazil                 | 2193 (1555-2286)          |                                | 13 (9-14)                         |                                        | 466 (83-1534)              |                                 | 3 (1-9)                            |                                         | 415 (74-1366)        |                           | 3 (0-8)                      |                                   |
| 2008 | Brazil                 | 1791 (1270-1866)          |                                | 11 (8-12)                         |                                        | 402 (72-1334)              |                                 | 2 (0-8)                            |                                         | 358 (64-1175)        |                           | 2 (0-7)                      |                                   |
| 2009 | Brazil                 | 1587 (1125-1654)          |                                | 10 (7-11)                         |                                        | 330 (60-1080)              |                                 | 2 (0-7)                            |                                         | 293 (53-961)         |                           | 2 (0-6)                      |                                   |
| 2010 | Brazil                 | 1146 (813-1195)           |                                | 8 (5-8)                           |                                        | 259 (47-846)               |                                 | 2 (0-6)                            |                                         | 230 (42-753)         |                           | 2 (0-5)                      |                                   |
| 2011 | Brazil                 | 900 (638-938)             |                                | 6 (4-6)                           |                                        | 131 (24-429)               |                                 | 1 (0-3)                            |                                         | 117 (21-382)         |                           | 1 (0-3)                      |                                   |
| 2012 | Brazil                 | 752 (533-784)             |                                | 5 (4-5)                           |                                        | 101 (19-331)               |                                 | 1 (0-2)                            |                                         | 90 (17-295)          |                           | 1 (0-2)                      |                                   |
| 2013 | Brazil                 | 753 (534-784)             |                                | 5 (4-5)                           |                                        | 87 (16-283)                |                                 | 1 (0-2)                            |                                         | 77 (14-252)          |                           | 1 (0-2)                      |                                   |
| 2014 | Brazil                 | 678 (481-706)             |                                | 5 (3-5)                           |                                        | 88 (14-287)                |                                 | 1 (0-2)                            |                                         | 78 (14-256)          |                           | 1 (0-2)                      |                                   |
| 2015 | Brazil                 | 701 (497-730)             | 1 (1-1)                        | 5 (3-5)                           | 0 (0-0)                                | 89 (16-291)                | 0 (0-0)                         | 1 (0-2)                            | 0 (0-0)                                 | 79 (15-259)          | 0 (0-0)                   | 1 (0-2)                      | 0 (0-0)                           |
| 2000 | Brunei Darussalam      | 1 (1-1)                   |                                | 3 (2-3)                           |                                        | 0 (0-0)                    |                                 | 0 (0-0)                            |                                         | 0 (0-0)              |                           | 0 (0-0)                      |                                   |
| 2001 | Brunei Darussalam      | 1 (1-1)                   |                                | 3 (2-3)                           |                                        | 0 (0-0)                    |                                 | 0 (0-0)                            |                                         | 0 (0-0)              |                           | 0 (0-0)                      |                                   |
| 2002 | Brunei Darussalam      | 1 (1-1)                   |                                | 3 (2-4)                           |                                        | 0 (0-0)                    |                                 | 0 (0-0)                            |                                         | 0 (0-0)              |                           | 0 (0-0)                      |                                   |
| 2003 | Brunei Darussalam      | 1 (1-1)                   |                                | 3 (2-4)                           |                                        | 0 (0-0)                    |                                 | 0 (0-0)                            |                                         | 0 (0-0)              |                           | 0 (0-0)                      |                                   |
| 2004 | Brunei Darussalam      | 1 (1-1)                   |                                | 3 (2-4)                           |                                        | 0 (0-0)                    |                                 | 0 (0-0)                            |                                         | 0 (0-0)              |                           | 0 (0-0)                      |                                   |
| 2005 | Brunei Darussalam      | 1 (1-1)                   |                                | 3 (2-3)                           |                                        | 0 (0-0)                    |                                 | 0 (0-0)                            |                                         | 0 (0-0)              |                           | 0 (0-0)                      |                                   |
| 2006 | Brunei Darussalam      | 1 (1-1)                   |                                | 3 (2-3)                           |                                        | 0 (0-0)                    |                                 | 0 (0-0)                            |                                         | 0 (0-0)              |                           | 0 (0-0)                      |                                   |
| 2007 | Brunei Darussalam      | 1 (1-1)                   |                                | 3 (2-3)                           |                                        | 0 (0-0)                    |                                 | 0 (0-0)                            |                                         | 0 (0-0)              |                           | 0 (0-0)                      |                                   |
| 2008 | Brunei Darussalam      | 1 (1-1)                   |                                | 4 (3-4)                           |                                        | 0 (0-0)                    |                                 | 0 (0-0)                            |                                         | 0 (0-0)              |                           | 0 (0-0)                      |                                   |
| 2009 | Brunei Darussalam      | 1 (1-1)                   |                                | 3 (2-3)                           |                                        | 0 (0-0)                    |                                 | 0 (0-0)                            |                                         | 0 (0-0)              |                           | 0 (0-0)                      |                                   |
| 2010 | Brunei Darussalam      | 1 (1-1)                   |                                | 4 (3-4)                           |                                        | 0 (0-0)                    |                                 | 0 (0-0)                            |                                         | 0 (0-0)              |                           | 0 (0-0)                      |                                   |
| 2011 | Brunei Darussalam      | 1 (1-1)                   |                                | 3 (2-3)                           |                                        | 0 (0-0)                    |                                 | 0 (0-0)                            |                                         | 0 (0-0)              |                           | 0 (0-0)                      |                                   |
| 2012 | Brunei Darussalam      | 1 (1-1)                   |                                | 3 (2-4)                           |                                        | 0 (0-0)                    |                                 | 1 (0-1)                            |                                         | 0 (0-0)              |                           | 1 (0-1)                      |                                   |
| 2013 | Brunei Darussalam      | 1 (1-1)                   |                                | 3 (2-3)                           |                                        | 0 (0-0)                    |                                 | 1 (0-1)                            |                                         | 0 (0-0)              |                           | 1 (0-1)                      |                                   |
| 2014 | Brunei Darussalam      | 1 (1-1)                   |                                | 2 (2-3)                           |                                        | 0 (0-0)                    |                                 | 1 (1-1)                            |                                         | 0 (0-0)              |                           | 1 (1-1)                      |                                   |
| 2015 | Brunei Darussalam      | 1 (1-1)                   | 0 (0-0)                        | 2 (2-2)                           | 0 (0-0)                                | 0 (0-0)                    | 0 (0-0)                         | 0 (0-1)                            | 0 (0-0)                                 | 0 (0-0)              | 0 (0-0)                   | 0 (0-0)                      | 0 (0-0)                           |
| 2000 | Bulgaria               | 84 (60-88)                |                                | 26 (18-27)                        |                                        | 6 (3-10)                   |                                 | 2 (1-3)                            |                                         | 5 (2-9)              |                           | 2 (1-3)                      |                                   |
| 2001 | Bulgaria               | 78 (56-82)                |                                | 24 (17-25)                        |                                        | 5 (2-9)                    |                                 | 2 (1-3)                            |                                         | 4 (2-8)              |                           | 1 (1-2)                      |                                   |
| 2002 | Bulgaria               | 63 (45-65)                |                                | 20 (14-21)                        |                                        | 3 (1-5)                    |                                 | 1 (0-1)                            |                                         | 2 (1-4)              |                           | 1 (0-1)                      |                                   |
| 2003 | Bulgaria               | 73 (52-77)                |                                | 24 (17-25)                        |                                        | 7 (3-12)                   |                                 | 2 (1-4)                            |                                         | 6 (3-11)             |                           | 2 (1-3)                      |                                   |
| 2004 | Bulgaria               | 52 (37-54)                |                                | 17 (12-17)                        |                                        | 6 (3-10)                   |                                 | 2 (1-3)                            |                                         | 5 (2-9)              |                           | 2 (1-3)                      |                                   |
| 2005 | Bulgaria               | 58 (41-61)                |                                | 19 (13-19)                        |                                        | 5 (2-9)                    |                                 | 2 (1-3)                            |                                         | 4 (2-8)              |                           | 1 (1-3)                      |                                   |
| 2006 | Bulgaria               | 56 (40-58)                |                                | 18 (12-18)                        |                                        | 6 (3-11)                   |                                 | 2 (1-4)                            |                                         | 6 (3-10)             |                           | 2 (1-3)                      |                                   |
| 2007 | Bulgaria               | 51 (36-53)                |                                | 16 (11-16)                        |                                        | 5 (2-9)                    |                                 | 2 (1-3)                            |                                         | 5 (2-8)              |                           | 1 (1-3)                      |                                   |
| 2008 | Bulgaria               | 45 (32-47)                |                                | 13 (9-14)                         |                                        | 7 (3-13)                   |                                 | 2 (1-4)                            |                                         | 6 (3-11)             |                           | 2 (1-3)                      |                                   |
| 2009 | Bulgaria               | 67 (47-69)                |                                | 19 (14-20)                        |                                        | 5 (2-9)                    |                                 | 1 (1-2)                            |                                         | 4 (2-8)              |                           | 1 (1-2)                      |                                   |
| 2010 | Bulgaria               | 48 (34-50)                |                                | 14 (10-14)                        |                                        | 4 (2-8)                    |                                 | 1 (1-2)                            |                                         | 4 (2-7)              |                           | 1 (1-2)                      |                                   |
| 2011 | Bulgaria               | 29 (21-31)                |                                | 8 (6-8)                           |                                        | 3 (1-5)                    |                                 | 1 (0-1)                            |                                         | 2 (1-4)              |                           | 1 (0-1)                      |                                   |
| 2012 | Bulgaria               | 25 (17-26)                |                                | 7 (5-7)                           |                                        | 2 (1-4)                    |                                 | 1 (0-1)                            |                                         | 2 (1-4)              |                           | 1 (0-1)                      |                                   |
| 2013 | Bulgaria               | 23 (16-24)                |                                | 7 (5-7)                           |                                        | 2 (1-4)                    |                                 | 1 (0-1)                            |                                         | 2 (1-3)              |                           | 1 (0-1)                      |                                   |
| 2014 | Bulgaria               | 15 (11-16)                |                                | 4 (3-5)                           |                                        | 1 (1-2)                    |                                 | 0 (0-1)                            |                                         | 1 (1-2)              |                           | 0 (0-1)                      |                                   |
| 2015 | Bulgaria               | 13 (9-13)                 | 0 (0-0)                        | 4 (3-4)                           | 0 (0-0)                                | 1 (1-2)                    | 0 (0-0)                         | 0 (0-1)                            | 0 (0-0)                                 | 1 (0-2)              | 0 (0-0)                   | 0 (0-1)                      | 0 (0-0)                           |
| 2000 | Burkina Faso           | 2822 (2001-2941)          |                                | 132 (84-138)                      |                                        | 543 (287-1035)             |                                 | 25 (13-48)                         |                                         | 171 (90-325)         |                           | 8 (4-15)                     |                                   |
| 2001 | Burkina Faso           | 2991 (2121-3117)          |                                | 136 (96-141)                      |                                        | 575 (305-1092)             |                                 | 26 (14-50)                         |                                         | 181 (96-343)         |                           | 8 (4-16)                     |                                   |
| 2002 | Burkina Faso           | 3173 (2250-3307)          |                                | 140 (99-146)                      |                                        | 609 (325-1154)             |                                 | 27 (14-51)                         |                                         | 192 (102-363)        |                           | 8 (5-16)                     |                                   |
| 2003 | Burkina Faso           | 3363 (2385-3505)          |                                | 145 (103-151)                     |                                        | 644 (345-1217)             |                                 | 28 (15-52)                         |                                         | 202 (108-383)        |                           | 9 (5-16)                     |                                   |
| 2004 | Burkina Faso           | 3525 (2499-3673)          |                                | 148 (105-154)                     |                                        | 671 (362-1288)             |                                 | 28 (15-53)                         |                                         | 211 (114-399)        |                           | 9 (5-17)                     |                                   |
| 2005 | Burkina Faso           | 3569 (2531-3719)          |                                | 146 (104-152)                     |                                        | 676 (367-1277)             |                                 | 28 (15-52)                         |                                         | 212 (115-401)        |                           | 9 (5-16)                     |                                   |
| 2006 | Burkina Faso           | 3454 (2449-3600)          |                                | 137 (97-143)                      |                                        | 605 (242-1404)             |                                 | 26 (10-56)                         |                                         | 204 (76-441)         |                           | 8 (0-17)                     |                                   |
| 2007 | Burkina Faso           | 3186 (2259-3320)          |                                | 123 (87-128)                      |                                        | 599 (232-1282)             |                                 | 23 (9-49)                          |                                         | 188 (73-403)         |                           | 7 (0-15)                     |                                   |
| 2008 | Burkina Faso           | 2878 (2041-2999)          |                                | 108 (76-112)                      |                                        | 541 (218-1143)             |                                 | 20 (8-43)                          |                                         | 170 (68-359)         |                           | 6 (0-13)                     |                                   |
| 2009 | Burkina Faso           | 2719 (1928-2834)          |                                | 99 (70-103)                       |                                        | 511 (213-1064)             |                                 | 19 (8-39)                          |                                         | 161 (67-334)         |                           | 6 (2-12)                     |                                   |
| 2010 | Burkina Faso           | 2707 (1919-2821)          |                                | 96 (68-100)                       |                                        | 509 (220-1039)             |                                 | 18 (8-37)                          |                                         | 160 (69-327)         |                           | 6 (2-12)                     |                                   |
| 2011 | Burkina Faso           | 2871 (2040-2998)          |                                | 100 (71-104)                      |                                        | 540 (242-1061)             |                                 | 19 (8-38)                          |                                         | 170 (76-340)         |                           | 6 (0-12)                     |                                   |
| 2012 | Burkina Faso           | 3054 (2165-3182)          |                                | 104 (74-108)                      |                                        | 574 (267-1122)             |                                 | 20 (9-38)                          |                                         | 180 (84-353)         |                           | 6 (0-12)                     |                                   |
| 2013 | Burkina Faso           | 3253 (2307-3390)          |                                | 109 (77-113)                      |                                        | 612 (297-1170)             |                                 | 20 (10-39)                         |                                         | 192 (93-368)         |                           | 6 (0-12)                     |                                   |
| 2014 | Burkina Faso           | 2241 (1589-2335)          |                                | 74 (52-77)                        |                                        | 395 (200-739)              |                                 | 13 (7-24)                          |                                         | 124 (63-232)         |                           | 4 (2-8)                      |                                   |
| 2015 | Burkina Faso           | 1882 (1335-1961)          | 71 (51-74)                     | 61 (43-63)                        | 2 (2-2)                                | 332 (177-608)              | 13 (7-23)                       | 11 (6-20)                          | 0 (0-1)                                 | 104 (56-191)         | 4 (2-7)                   | 3 (2-6)                      | 0 (0-0)                           |
| 2000 | Burundi                | 2274 (1613-2370)          |                                | 190 (135-198)                     |                                        | 497 (275-940)              |                                 | 41 (23-78)                         |                                         | 156 (86-296)         |                           | 13 (7-25)                    |                                   |
| 2001 | Burundi                | 2264 (1605-2359)          |                                | 187 (132-195)                     |                                        | 495 (187-1074)             |                                 | 41 (15-89)                         |                                         | 156 (89-338)         |                           | 13 (6-28)                    |                                   |
| 2002 | Burundi                | 2224 (1577-2318)          |                                | 180 (128-188)                     |                                        | 488 (184-1052)             |                                 | 39 (15-86)                         |                                         | 153 (85-334)         |                           | 13 (6-27)                    |                                   |
| 2003 | Burundi                | 2358 (1672-2457)          |                                | 186 (132-194)                     |                                        | 519 (195-1134)             |                                 | 41 (15-90)                         |                                         | 163 (81-356)         |                           | 13 (6-28)                    |                                   |
| 2004 | Burundi                | 2445 (1734-2548)          |                                | 187 (133-195)                     |                                        | 541 (203-1183)             |                                 | 41 (16-91)                         |                                         | 170 (64-372)         |                           | 13 (6-28)                    |                                   |
| 2005 | Burundi                | 2433 (1725-2535)          |                                | 179 (127-187)                     |                                        | 541 (202-1183)             |                                 | 40 (15-87)                         |                                         | 170 (64-372)         |                           | 13 (6-27)                    |                                   |
| 2006 | Burundi                | 2565 (1819-2673)          |                                | 181 (128-189                      |                                        |                            |                                 |                                    |                                         |                      |                           |                              |                                   |

| Year | Country                  | Spn pneumonia deaths (UR) | Spn pneumonia deaths, HIV (UR) | Spn pneumonia mortality rate (UR) | Spn pneumonia mortality rate, HIV (UR) | Spn meningitis deaths (UR) | Spn meningitis deaths, HIV (UR) | Spn meningitis mortality rate (UR) | Spn meningitis mortality rate, HIV (UR) | Spn NPNM deaths (UR) | Spn NPNM deaths, HIV (UR) | Spn NPNM mortality rate (UR) | Spn NPNM mortality rate, HIV (UR) |
|------|--------------------------|---------------------------|--------------------------------|-----------------------------------|----------------------------------------|----------------------------|---------------------------------|------------------------------------|-----------------------------------------|----------------------|---------------------------|------------------------------|-----------------------------------|
| 2007 | Burundi                  | 2578 (1828-2686)          |                                | 174 (123-181)                     |                                        | 578 (228-1237)             |                                 | 39 (15-83)                         |                                         | 182 (72-389)         |                           | 12 (5-26)                    |                                   |
| 2008 | Burundi                  | 2574 (1826-2683)          |                                | 166 (118-173)                     |                                        | 579 (234-1225)             |                                 | 37 (15-79)                         |                                         | 182 (74-385)         |                           | 12 (5-25)                    |                                   |
| 2009 | Burundi                  | 2582 (1831-2691)          |                                | 159 (113-166)                     |                                        | 585 (243-1219)             |                                 | 36 (15-75)                         |                                         | 184 (76-383)         |                           | 11 (5-24)                    |                                   |
| 2010 | Burundi                  | 2574 (1826-2683)          |                                | 152 (108-158)                     |                                        | 588 (251-1207)             |                                 | 35 (15-71)                         |                                         | 185 (79-380)         |                           | 11 (5-22)                    |                                   |
| 2011 | Burundi                  | 2459 (1744-2563)          |                                | 138 (98-144)                      |                                        | 562 (247-1137)             |                                 | 32 (14-64)                         |                                         | 177 (78-358)         |                           | 10 (4-20)                    |                                   |
| 2012 | Burundi                  | 1623 (1151-1691)          |                                | 88 (82-92)                        |                                        | 349 (158-695)              |                                 | 19 (9-38)                          |                                         | 110 (50-218)         |                           | 6 (3-12)                     |                                   |
| 2013 | Burundi                  | 1338 (949-1394)           |                                | 70 (50-73)                        |                                        | 291 (138-570)              |                                 | 15 (7-30)                          |                                         | 92 (43-179)          |                           | 5 (2-9)                      |                                   |
| 2014 | Burundi                  | 1199 (850-1249)           |                                | 61 (43-64)                        |                                        | 277 (134-533)              |                                 | 14 (7-27)                          |                                         | 87 (42-168)          |                           | 4 (2-9)                      |                                   |
| 2015 | Burundi                  | 879 (623-916)             | 38 (27-40)                     | 43 (31-45)                        | 2 (1-2)                                | 199 (100-378)              |                                 | 10 (5-19)                          | 0 (0-1)                                 | 63 (31-119)          | 3 (1-5)                   | 3 (2-6)                      | 0 (0-0)                           |
| 2000 | Cambodia                 | 2341 (1660-2440)          |                                | 151 (107-157)                     |                                        | 404 (140-918)              |                                 | 26 (9-59)                          |                                         | 127 (44-289)         |                           | 8 (3-19)                     |                                   |
| 2001 | Cambodia                 | 2053 (1456-2139)          |                                | 135 (96-141)                      |                                        | 348 (123-788)              |                                 | 23 (8-52)                          |                                         | 110 (39-248)         |                           | 7 (3-16)                     |                                   |
| 2002 | Cambodia                 | 1783 (1264-1858)          |                                | 119 (84-124)                      |                                        | 298 (107-670)              |                                 | 20 (7-45)                          |                                         | 94 (34-211)          |                           | 6 (2-14)                     |                                   |
| 2003 | Cambodia                 | 1557 (1104-1622)          |                                | 104 (74-108)                      |                                        | 256 (94-573)               |                                 | 17 (8-38)                          |                                         | 80 (30-180)          |                           | 5 (2-12)                     |                                   |
| 2004 | Cambodia                 | 1400 (993-1458)           |                                | 93 (66-97)                        |                                        | 227 (71-519)               |                                 | 15 (5-35)                          |                                         | 202 (63-462)         |                           | 13 (4-31)                    |                                   |
| 2005 | Cambodia                 | 1286 (912-1340)           |                                | 85 (60-89)                        |                                        | 204 (65-465)               |                                 | 14 (4-31)                          |                                         | 182 (58-414)         |                           | 12 (4-27)                    |                                   |
| 2006 | Cambodia                 | 1199 (851-1250)           |                                | 78 (55-81)                        |                                        | 188 (62-423)               |                                 | 12 (4-27)                          |                                         | 167 (55-376)         |                           | 11 (4-24)                    |                                   |
| 2007 | Cambodia                 | 1117 (792-1164)           |                                | 71 (50-74)                        |                                        | 173 (59-385)               |                                 | 11 (4-24)                          |                                         | 154 (53-342)         |                           | 10 (3-22)                    |                                   |
| 2008 | Cambodia                 | 1037 (735-1080)           |                                | 65 (46-68)                        |                                        | 160 (57-351)               |                                 | 10 (4-22)                          |                                         | 143 (51-312)         |                           | 9 (3-20)                     |                                   |
| 2009 | Cambodia                 | 946 (671-986)             |                                | 58 (41-61)                        |                                        | 146 (54-316)               |                                 | 9 (3-19)                           |                                         | 130 (48-281)         |                           | 8 (3-17)                     |                                   |
| 2010 | Cambodia                 | 841 (596-876)             |                                | 51 (36-53)                        |                                        | 130 (50-276)               |                                 | 8 (3-17)                           |                                         | 115 (44-245)         |                           | 7 (3-15)                     |                                   |
| 2011 | Cambodia                 | 752 (533-784)             |                                | 44 (31-46)                        |                                        | 115 (45-243)               |                                 | 7 (3-14)                           |                                         | 103 (40-216)         |                           | 6 (2-13)                     |                                   |
| 2012 | Cambodia                 | 657 (466-685)             |                                | 38 (27-40)                        |                                        | 100 (39-209)               |                                 | 6 (2-12)                           |                                         | 89 (35-186)          |                           | 5 (2-11)                     |                                   |
| 2013 | Cambodia                 | 594 (422-620)             |                                | 34 (24-36)                        |                                        | 90 (36-186)                |                                 | 5 (2-11)                           |                                         | 80 (32-166)          |                           | 5 (2-10)                     |                                   |
| 2014 | Cambodia                 | 548 (398-571)             |                                | 32 (22-33)                        |                                        | 82 (33-169)                |                                 | 5 (2-10)                           |                                         | 73 (30-151)          |                           | 4 (2-9)                      |                                   |
| 2015 | Cambodia                 | 345 (247-364)             | 6 (4-6)                        | 20 (14-21)                        | 0 (0-0)                                | 45 (15-121)                | 1 (0-2)                         | 4 (1-7)                            | 0 (0-0)                                 | 44 (14-108)          | 1 (0-2)                   | 3 (1-6)                      | 0 (0-0)                           |
| 2000 | Cameroon                 | 4934 (3499-5142)          |                                | 182 (129-190)                     |                                        | 745 (384-1465)             |                                 | 27 (14-54)                         |                                         | 234 (121-461)        |                           | 9 (4-17)                     |                                   |
| 2001 | Cameroon                 | 4771 (3383-4973)          |                                | 172 (122-179)                     |                                        | 718 (250-1612)             |                                 | 26 (9-58)                          |                                         | 226 (79-507)         |                           | 8 (3-18)                     |                                   |
| 2002 | Cameroon                 | 4738 (3360-4938)          |                                | 167 (118-174)                     |                                        | 711 (255-1586)             |                                 | 25 (9-56)                          |                                         | 224 (80-499)         |                           | 8 (3-18)                     |                                   |
| 2003 | Cameroon                 | 4600 (3262-4794)          |                                | 158 (112-165)                     |                                        | 690 (256-1525)             |                                 | 24 (9-52)                          |                                         | 217 (80-479)         |                           | 7 (3-16)                     |                                   |
| 2004 | Cameroon                 | 4488 (3182-4677)          |                                | 151 (107-157)                     |                                        | 672 (257-1474)             |                                 | 23 (9-49)                          |                                         | 211 (81-463)         |                           | 7 (3-16)                     |                                   |
| 2005 | Cameroon                 | 4464 (3165-4652)          |                                | 146 (104-153)                     |                                        | 668 (250-1471)             |                                 | 22 (8-48)                          |                                         | 210 (79-463)         |                           | 7 (3-15)                     |                                   |
| 2006 | Cameroon                 | 4553 (3228-4745)          |                                | 145 (103-151)                     |                                        | 680 (249-1507)             |                                 | 22 (8-48)                          |                                         | 214 (78-474)         |                           | 7 (3-15)                     |                                   |
| 2007 | Cameroon                 | 4603 (3264-4797)          |                                | 144 (102-150)                     |                                        | 687 (250-1527)             |                                 | 21 (8-48)                          |                                         | 216 (79-480)         |                           | 7 (2-15)                     |                                   |
| 2008 | Cameroon                 | 4770 (3383-4971)          |                                | 146 (104-152)                     |                                        | 710 (257-1585)             |                                 | 22 (8-49)                          |                                         | 223 (81-498)         |                           | 7 (2-15)                     |                                   |
| 2009 | Cameroon                 | 5010 (3553-5221)          |                                | 151 (107-157)                     |                                        | 743 (267-1665)             |                                 | 22 (8-50)                          |                                         | 234 (84-523)         |                           | 7 (3-16)                     |                                   |
| 2010 | Cameroon                 | 5066 (3593-5280)          |                                | 150 (106-156)                     |                                        | 750 (267-1683)             |                                 | 22 (8-50)                          |                                         | 236 (84-529)         |                           | 7 (2-16)                     |                                   |
| 2011 | Cameroon                 | 4654 (3300-4850)          |                                | 135 (96-141)                      |                                        | 677 (239-1526)             |                                 | 20 (7-44)                          |                                         | 213 (75-480)         |                           | 6 (2-14)                     |                                   |
| 2012 | Cameroon                 | 3341 (2368-3482)          |                                | 95 (68-99)                        |                                        | 462 (162-1043)             |                                 | 13 (5-30)                          |                                         | 145 (51-328)         |                           | 4 (1-9)                      |                                   |
| 2013 | Cameroon                 | 2771 (1955-2888)          |                                | 78 (55-81)                        |                                        | 394 (134-870)              |                                 | 11 (4-24)                          |                                         | 121 (42-274)         |                           | 3 (1-6)                      |                                   |
| 2014 | Cameroon                 | 2492 (1767-2597)          |                                | 69 (49-72)                        |                                        | 358 (124-812)              |                                 | 10 (3-22)                          |                                         | 112 (38-255)         |                           | 3 (1-7)                      |                                   |
| 2015 | Cameroon                 | 1739 (1233-1812)          | 335 (237-349)                  | 47 (34-49)                        | 9 (6-9)                                | 241 (83-548)               | 46 (16-105)                     | 7 (2-15)                           | 1 (0-3)                                 | 76 (26-172)          | 15 (5-33)                 | 2 (1-5)                      | 0 (0-1)                           |
| 2000 | Canada                   | 18 (13-18)                |                                | 1 (1-1)                           |                                        | 17 (5-30)                  |                                 | 1 (0-2)                            |                                         | 15 (5-27)            |                           | 1 (0-2)                      |                                   |
| 2001 | Canada                   | 18 (12-18)                |                                | 1 (1-1)                           |                                        | 13 (4-23)                  |                                 | 1 (0-1)                            |                                         | 11 (4-21)            |                           | 1 (0-1)                      |                                   |
| 2002 | Canada                   | 14 (10-14)                |                                | 1 (1-1)                           |                                        | 12 (4-21)                  |                                 | 1 (0-1)                            |                                         | 11 (3-19)            |                           | 1 (0-1)                      |                                   |
| 2003 | Canada                   | 15 (10-15)                |                                | 1 (1-1)                           |                                        | 12 (4-22)                  |                                 | 1 (0-1)                            |                                         | 11 (3-19)            |                           | 1 (0-1)                      |                                   |
| 2004 | Canada                   | 12 (8-12)                 |                                | 1 (0-1)                           |                                        | 10 (3-19)                  |                                 | 1 (0-1)                            |                                         | 9 (3-17)             |                           | 1 (0-1)                      |                                   |
| 2005 | Canada                   | 12 (8-12)                 |                                | 1 (0-1)                           |                                        | 10 (3-18)                  |                                 | 1 (0-1)                            |                                         | 9 (3-16)             |                           | 1 (0-1)                      |                                   |
| 2006 | Canada                   | 14 (10-14)                |                                | 1 (1-1)                           |                                        | 12 (4-21)                  |                                 | 1 (0-1)                            |                                         | 10 (3-19)            |                           | 1 (0-1)                      |                                   |
| 2007 | Canada                   | 18 (13-19)                |                                | 1 (1-1)                           |                                        | 11 (3-19)                  |                                 | 1 (0-1)                            |                                         | 10 (3-17)            |                           | 1 (0-1)                      |                                   |
| 2008 | Canada                   | 9 (6-9)                   |                                | 0 (0-1)                           |                                        | 4 (1-8)                    |                                 | 0 (0-0)                            |                                         | 4 (1-7)              |                           | 0 (0-0)                      |                                   |
| 2009 | Canada                   | 14 (10-15)                |                                | 1 (1-1)                           |                                        | 12 (4-22)                  |                                 | 1 (0-1)                            |                                         | 11 (3-19)            |                           | 1 (0-1)                      |                                   |
| 2010 | Canada                   | 10 (7-11)                 |                                | 1 (0-1)                           |                                        | 10 (3-18)                  |                                 | 1 (0-1)                            |                                         | 9 (3-16)             |                           | 0 (0-1)                      |                                   |
| 2011 | Canada                   | 6 (4-6)                   |                                | 0 (0-0)                           |                                        | 4 (1-7)                    |                                 | 0 (0-0)                            |                                         | 4 (1-7)              |                           | 0 (0-0)                      |                                   |
| 2012 | Canada                   | 5 (3-5)                   |                                | 0 (0-0)                           |                                        | 4 (1-7)                    |                                 | 0 (0-0)                            |                                         | 3 (1-6)              |                           | 0 (0-0)                      |                                   |
| 2013 | Canada                   | 4 (3-4)                   |                                | 0 (0-0)                           |                                        | 3 (1-6)                    |                                 | 0 (0-0)                            |                                         | 3 (1-5)              |                           | 0 (0-0)                      |                                   |
| 2014 | Canada                   | 3 (2-3)                   |                                | 0 (0-0)                           |                                        | 3 (1-5)                    |                                 | 0 (0-0)                            |                                         | 3 (1-5)              |                           | 0 (0-0)                      |                                   |
| 2015 | Canada                   | 3 (2-3)                   | 0 (0-0)                        | 0 (0-0)                           | 0 (0-0)                                | 3 (1-5)                    | 0 (0-0)                         | 0 (0-0)                            | 0 (0-0)                                 | 2 (1-4)              | 0 (0-0)                   | 0 (0-0)                      | 0 (0-0)                           |
| 2000 | Cape Verde               | 22 (16-23)                |                                | 36 (26-38)                        |                                        | 2 (1-3)                    |                                 | 4 (2-5)                            |                                         | 2 (1-3)              |                           | 3 (2-5)                      |                                   |
| 2001 | Cape Verde               | 19 (14-20)                |                                | 32 (22-33)                        |                                        | 2 (1-3)                    |                                 | 3 (2-5)                            |                                         | 2 (1-3)              |                           | 3 (1-4)                      |                                   |
| 2002 | Cape Verde               | 17 (12-18)                |                                | 28 (20-30)                        |                                        | 2 (1-3)                    |                                 | 3 (2-5)                            |                                         | 2 (1-3)              |                           | 3 (2-4)                      |                                   |
| 2003 | Cape Verde               | 15 (11-16)                |                                | 26 (19-28)                        |                                        | 2 (1-3)                    |                                 | 3 (2-4)                            |                                         | 2 (1-2)              |                           | 3 (2-4)                      |                                   |
| 2004 | Cape Verde               | 14 (10-15)                |                                | 26 (18-27)                        |                                        | 2 (1-2)                    |                                 | 3 (2-4)                            |                                         | 2 (1-2)              |                           | 3 (2-4)                      |                                   |
| 2005 | Cape Verde               | 14 (10-15)                |                                | 26 (18-27)                        |                                        | 2 (1-2)                    |                                 | 3 (2-4)                            |                                         | 2 (1-2)              |                           | 3 (2-4)                      |                                   |
| 2006 | Cape Verde               | 14 (10-15)                |                                | 27 (19-28)                        |                                        | 2 (1-2)                    |                                 | 3 (2-5)                            |                                         | 2 (1-2)              |                           | 3 (2-4)                      |                                   |
| 2007 | Cape Verde               | 14 (10-15)                |                                | 28 (20-29)                        |                                        | 2 (1-2)                    |                                 | 3 (2-5)                            |                                         | 2 (1-2)              |                           | 3 (2-4)                      |                                   |
| 2008 | Cape Verde               | 14 (10-15)                |                                | 28 (20-29)                        |                                        | 2 (1-2)                    |                                 | 4 (2-5)                            |                                         | 2 (1-2)              |                           | 3 (2-4)                      |                                   |
| 2009 | Cape Verde               | 14 (10-15)                |                                | 27 (19-29)                        |                                        | 2 (1-2)                    |                                 | 4 (2-5)                            |                                         | 2 (1-2)              |                           | 3 (2-4)                      |                                   |
| 2010 | Cape Verde               | 14 (10-14)                |                                | 27 (19-28)                        |                                        | 2 (1-2)                    |                                 | 3 (2-5)                            |                                         | 2 (1-2)              |                           | 3 (2-4)                      |                                   |
| 2011 | Cape Verde               | 15 (10-15)                |                                | 28 (20-29)                        |                                        | 3 (2-4)                    |                                 | 5 (3-7)                            |                                         | 2 (2-3)              |                           | 5 (3-6)                      |                                   |
| 2012 | Cape Verde               | 14 (10-15)                |                                | 27 (19-28)                        |                                        | 3 (2-4)                    |                                 | 5 (3-7)                            |                                         | 2 (1-3)              |                           | 4 (3-6)                      |                                   |
| 2013 | Cape Verde               | 14 (10-14)                |                                | 26 (19-28)                        |                                        | 3 (2-3)                    |                                 | 5 (3-7)                            |                                         | 2 (1-3)              |                           | 4 (3-6)                      |                                   |
| 2014 | Cape Verde               | 13 (9-14)                 |                                | 25 (18-26)                        |                                        | 2 (2-3)                    |                                 | 5 (3-6)                            |                                         | 2 (1-3)              |                           | 4 (3-5)                      |                                   |
| 2015 | Cape Verde               | 13 (9-13)                 | 0 (0-1)                        | 24 (17-25)                        | 1 (1-1)                                | 2 (1-3)                    | 0 (0-0)                         | 4 (3-6)                            | 0 (0-0)                                 | 2 (1-3)              | 0 (0-0)                   | 4 (2-5)                      | 0 (0-0)                           |
| 2000 | Central African Republic | 891 (632-929)             |                                | 150 (106-156)                     |                                        | 192 (101-367)              |                                 | 32 (17-62)                         |                                         | 60 (32-115)          |                           | 10 (5-19)                    |                                   |
| 2001 | Central African Republic | 899 (638-937)             |                                | 147 (105-154)                     |                                        | 193 (102-371)              |                                 | 32 (17-61)                         |                                         | 61 (32-116)          |                           | 10 (5-19)                    |                                   |
| 2002 | Central African Republic | 911 (646-950)             |                                | 147 (104-154)                     |                                        | 196 (104-376)              |                                 | 32 (17-61)                         |                                         | 62 (33-118)          |                           | 10 (5-19)                    |                                   |
| 2003 | Central African Republic | 901 (632-929)             |                                | 143 (102-149)                     |                                        | 193 (104-370)              |                                 | 31 (16-59)                         |                                         | 61 (32-116)          |                           | 10 (5-19)                    |                                   |
| 2004 | Central African Republic | 868 (616-905)             |                                | 139 (98-145)                      |                                        | 188 (99-359)               |                                 | 30 (16-57)                         |                                         | 59 (31-113)          |                           | 9 (5-18)                     |                                   |
| 2005 | Central African Republic | 843 (598-879)             |                                | 134 (95-140)                      |                                        | 182 (96-348)               |                                 | 29 (15-55)                         |                                         | 57 (30-109)          |                           | 9 (5-17)                     |                                   |
| 2006 | Central African Republic | 879 (623-916)             |                                | 139 (98-145)                      |                                        | 188 (99-360)               |                                 | 30 (16-57)                         |                                         | 59 (31-113)          |                           | 9 (5-18)                     |                                   |
| 2007 | Central African Republic | 919 (652-958)             |                                | 145 (103-151)                     |                                        | 194 (102-372)              |                                 | 31 (16-59)                         |                                         | 61 (32-117)          |                           | 10 (5-18)                    |                                   |
| 2008 | Central African Republic | 950 (674-990)             |                                | 149 (106-156)                     |                                        | 197 (104-380)              |                                 | 31 (16-60)                         |                                         | 62 (33-119)          |                           | 10 (5-19)                    |                                   |
| 2009 | Central African Republic | 1029 (730-1072)           |                                | 161 (114-168)                     |                                        | 210 (110-406)              |                                 | 33 (17-61)                         |                                         | 66 (35-128)          |                           | 10 (5-20)                    |                                   |
| 2010 | Central African Republic | 1061 (767-1127)           |                                | 168 (119-175)                     |                                        | 219 (116-426)              |                                 | 34 (18-66)                         |                                         | 69 (36-134)          |                           | 11 (6-21)                    |                                   |
| 2011 | Central African Republic | 1091 (773-1137)           |                                | 167 (119-174)                     |                                        | 220 (77-493)               |                                 | 34 (12-76)                         |                                         | 69 (24-155)          |                           | 11 (4-24)                    |                                   |
| 2012 | Central African Republic | 916 (650-955)             |                                | 139 (98-144)                      |                                        | 182 (64-411)               |                                 | 28 (10-62)                         |                                         | 57 (20-129)          |                           | 9 (3-20)                     |                                   |
| 2013 | Central African Republic | 995 (706-1037)            |                                | 148 (105-154)                     |                                        | 207 (72-467)               |                                 | 31 (11-69)                         |                                         | 65 (23-147)          |                           | 10 (3-22)                    |                                   |
| 2014 | Central African Republic | 893 (633-930)             |                                | 130 (92-136)                      |                                        | 189 (66-428)               |                                 | 28 (10-62)                         |                                         | 59 (21-134)          |                           | 9 (3-20)                     |                                   |

Spn = *Streptococcus pneumoniae*; npnm = non-pneumonia, non-meningitis; HIV = deaths only in HIV-infected children; Uncertainty range provided in parentheses.

| Year | Country                  | Spn pneumonia deaths (UR) | Spn pneumonia deaths, HIV (UR) | Spn pneumonia mortality rate (UR) | Spn pneumonia mortality rate, HIV (UR) | Spn meningitis deaths (UR) | Spn meningitis deaths, HIV (UR) | Spn meningitis mortality rate (UR) | Spn meningitis mortality rate, HIV (UR) | Spn NPNM deaths (UR) | Spn NPNM deaths, HIV (UR) | Spn NPNM mortality rate (UR) | Spn NPNM mortality rate, HIV (UR) |
|------|--------------------------|---------------------------|--------------------------------|-----------------------------------|----------------------------------------|----------------------------|---------------------------------|------------------------------------|-----------------------------------------|----------------------|---------------------------|------------------------------|-----------------------------------|
| 2015 | Central African Republic | 856 (607-892)             | 213 (151-222)                  | 123 (87-128)                      | 31 (22-32)                             | 183 (64-416)               | 46 (16-103)                     | 26 (9-60)                          | 7 (2-15)                                | 58 (20-131)          | 14 (5-33)                 | 8 (3-19)                     | 2 (1-5)                           |
| 2000 | Chad                     | 4851 (3440-5055)          |                                | 292 (207-305)                     |                                        | 906 (462-1799)             |                                 | 55 (26-108)                        |                                         | 285 (145-566)        |                           | 17 (8-34)                    |                                   |
| 2001 | Chad                     | 4956 (3515-5165)          |                                | 287 (204-299)                     |                                        | 911 (459-1819)             |                                 | 53 (27-105)                        |                                         | 286 (144-572)        |                           | 17 (8-33)                    |                                   |
| 2002 | Chad                     | 5366 (3805-5592)          |                                | 300 (212-312)                     |                                        | 961 (478-1928)             |                                 | 54 (27-108)                        |                                         | 302 (150-606)        |                           | 17 (8-34)                    |                                   |
| 2003 | Chad                     | 5402 (3831-5630)          |                                | 291 (206-303)                     |                                        | 937 (481-1899)             |                                 | 51 (25-102)                        |                                         | 295 (145-594)        |                           | 16 (8-32)                    |                                   |
| 2004 | Chad                     | 5598 (3970-5834)          |                                | 292 (207-304)                     |                                        | 940 (457-1903)             |                                 | 49 (24-99)                         |                                         | 296 (144-598)        |                           | 15 (7-31)                    |                                   |
| 2005 | Chad                     | 5788 (4104-6032)          |                                | 292 (207-305)                     |                                        | 951 (468-1919)             |                                 | 48 (24-97)                         |                                         | 299 (147-603)        |                           | 15 (7-30)                    |                                   |
| 2006 | Chad                     | 6167 (4373-6427)          |                                | 301 (214-314)                     |                                        | 1003 (498-2012)            |                                 | 49 (24-98)                         |                                         | 315 (157-633)        |                           | 15 (8-31)                    |                                   |
| 2007 | Chad                     | 6115 (4336-6373)          |                                | 290 (206-303)                     |                                        | 990 (496-1973)             |                                 | 47 (24-94)                         |                                         | 311 (156-620)        |                           | 15 (7-29)                    |                                   |
| 2008 | Chad                     | 6402 (4539-6671)          |                                | 296 (210-309)                     |                                        | 1046 (524-2051)            |                                 | 48 (24-95)                         |                                         | 326 (165-645)        |                           | 15 (8-30)                    |                                   |
| 2009 | Chad                     | 6268 (4444-6532)          |                                | 283 (201-295)                     |                                        | 1014 (518-1994)            |                                 | 46 (23-90)                         |                                         | 319 (163-627)        |                           | 14 (7-28)                    |                                   |
| 2010 | Chad                     | 6331 (4490-6598)          |                                | 278 (197-290)                     |                                        | 1022 (527-1997)            |                                 | 45 (23-89)                         |                                         | 321 (166-628)        |                           | 14 (7-28)                    |                                   |
| 2011 | Chad                     | 6376 (4521-6644)          |                                | 272 (193-284)                     |                                        | 1027 (536-1996)            |                                 | 44 (23-85)                         |                                         | 323 (168-628)        |                           | 14 (7-27)                    |                                   |
| 2012 | Chad                     | 6389 (4530-6658)          |                                | 266 (188-277)                     |                                        | 1023 (541-1982)            |                                 | 43 (22-82)                         |                                         | 322 (170-623)        |                           | 13 (7-26)                    |                                   |
| 2013 | Chad                     | 6426 (4557-6697)          |                                | 261 (185-272)                     |                                        | 1022 (567-2263)            |                                 | 41 (15-92)                         |                                         | 321 (115-711)        |                           | 13 (5-29)                    |                                   |
| 2014 | Chad                     | 6391 (4532-6661)          |                                | 253 (179-264)                     |                                        | 1010 (371-2229)            |                                 | 40 (15-88)                         |                                         | 317 (116-701)        |                           | 13 (5-28)                    |                                   |
| 2015 | Chad                     | 6347 (4500-6614)          | 1020 (723-1063)                | 245 (174-256)                     | 39 (28-41)                             | 997 (374-2192)             | 160 (60-352)                    | 38 (14-85)                         | 6 (2-14)                                | 313 (118-689)        | 50 (19-111)               | 12 (5-27)                    | 2 (1-4)                           |
| 2000 | Chile                    | 102 (72-106)              |                                | 8 (6-8)                           |                                        | 30 (15-47)                 |                                 | 2 (1-4)                            |                                         | 27 (13-42)           |                           | 2 (1-3)                      |                                   |
| 2001 | Chile                    | 113 (60-118)              |                                | 9 (6-9)                           |                                        | 42 (20-64)                 |                                 | 3 (2-5)                            |                                         | 37 (18-67)           |                           | 3 (1-6)                      |                                   |
| 2002 | Chile                    | 55 (35-57)                |                                | 4 (3-5)                           |                                        | 30 (15-46)                 |                                 | 2 (1-4)                            |                                         | 27 (13-41)           |                           | 2 (1-3)                      |                                   |
| 2003 | Chile                    | 54 (38-56)                |                                | 4 (3-5)                           |                                        | 31 (15-48)                 |                                 | 3 (1-4)                            |                                         | 28 (14-43)           |                           | 2 (1-3)                      |                                   |
| 2004 | Chile                    | 52 (37-54)                |                                | 4 (3-4)                           |                                        | 26 (13-40)                 |                                 | 2 (1-3)                            |                                         | 23 (11-35)           |                           | 2 (1-3)                      |                                   |
| 2005 | Chile                    | 45 (32-47)                |                                | 4 (3-4)                           |                                        | 28 (14-43)                 |                                 | 2 (1-4)                            |                                         | 25 (12-38)           |                           | 2 (1-3)                      |                                   |
| 2006 | Chile                    | 34 (24-35)                |                                | 3 (2-3)                           |                                        | 17 (8-26)                  |                                 | 1 (1-2)                            |                                         | 15 (7-24)            |                           | 1 (1-2)                      |                                   |
| 2007 | Chile                    | 41 (29-42)                |                                | 3 (2-4)                           |                                        | 14 (7-21)                  |                                 | 1 (1-2)                            |                                         | 12 (6-19)            |                           | 1 (1-2)                      |                                   |
| 2008 | Chile                    | 46 (32-47)                |                                | 4 (3-4)                           |                                        | 15 (7-23)                  |                                 | 4 (1-2)                            |                                         | 13 (7-21)            |                           | 1 (1-2)                      |                                   |
| 2009 | Chile                    | 44 (31-46)                |                                | 4 (3-4)                           |                                        | 11 (6-18)                  |                                 | 1 (0-1)                            |                                         | 10 (5-16)            |                           | 1 (0-1)                      |                                   |
| 2010 | Chile                    | 33 (24-35)                |                                | 3 (2-3)                           |                                        | 19 (9-30)                  |                                 | 2 (1-3)                            |                                         | 17 (8-26)            |                           | 1 (1-2)                      |                                   |
| 2011 | Chile                    | 18 (13-18)                |                                | 2 (1-2)                           |                                        | 10 (5-15)                  |                                 | 1 (0-1)                            |                                         | 8 (4-13)             |                           | 1 (0-1)                      |                                   |
| 2012 | Chile                    | 15 (10-15)                |                                | 1 (1-1)                           |                                        | 10 (5-15)                  |                                 | 1 (0-1)                            |                                         | 8 (4-13)             |                           | 1 (0-1)                      |                                   |
| 2013 | Chile                    | 16 (11-17)                |                                | 1 (1-1)                           |                                        | 5 (2-7)                    |                                 | 0 (0-1)                            |                                         | 4 (2-6)              |                           | 0 (0-1)                      |                                   |
| 2014 | Chile                    | 12 (8-13)                 |                                | 1 (1-1)                           |                                        | 6 (3-10)                   |                                 | 0 (0-1)                            |                                         | 6 (3-9)              |                           | 0 (0-1)                      |                                   |
| 2015 | Chile                    | 9 (7-10)                  | 0 (0-0)                        | 1 (1-1)                           | 0 (0-0)                                | 5 (2-7)                    | 0 (0-0)                         | 0 (0-1)                            | 0 (0-0)                                 | 4 (2-6)              | 0 (0-0)                   | 0 (0-1)                      | 0 (0-0)                           |
| 2000 | China                    | 22713 (16106-23670)       |                                | 29 (21-30)                        |                                        | 2882 (1348-4374)           |                                 | 4 (2-6)                            |                                         | 2566 (1201-3894)     |                           | 3 (2-5)                      |                                   |
| 2001 | China                    | 19466 (13803-20286)       |                                | 25 (18-26)                        |                                        | 2497 (1147-3720)           |                                 | 3 (1-5)                            |                                         | 2223 (1021-3312)     |                           | 3 (1-4)                      |                                   |
| 2002 | China                    | 16759 (11884-17465)       |                                | 22 (16-23)                        |                                        | 2197 (980-3179)            |                                 | 3 (1-4)                            |                                         | 1956 (873-2830)      |                           | 3 (1-4)                      |                                   |
| 2003 | China                    | 14281 (10126-14883)       |                                | 19 (14-20)                        |                                        | 1990 (1369-3146)           |                                 | 3 (2-4)                            |                                         | 1772 (1219-2801)     |                           | 2 (2-4)                      |                                   |
| 2004 | China                    | 12283 (8710-12801)        |                                | 17 (12-17)                        |                                        | 1609 (1176-2701)           |                                 | 2 (2-4)                            |                                         | 1610 (1047-2405)     |                           | 2 (1-3)                      |                                   |
| 2005 | China                    | 10736 (7613-11189)        |                                | 14 (10-15)                        |                                        | 1725 (1067-2452)           |                                 | 2 (1-3)                            |                                         | 1536 (950-2183)      |                           | 2 (1-3)                      |                                   |
| 2006 | China                    | 9824 (6966-10238)         |                                | 13 (9-13)                         |                                        | 1732 (1040-2389)           |                                 | 2 (1-3)                            |                                         | 1542 (926-2127)      |                           | 2 (1-3)                      |                                   |
| 2007 | China                    | 9131 (6475-9516)          |                                | 12 (8-12)                         |                                        | 1701 (1021-2346)           |                                 | 2 (1-3)                            |                                         | 1515 (909-2089)      |                           | 2 (1-3)                      |                                   |
| 2008 | China                    | 8604 (6101-8966)          |                                | 11 (8-12)                         |                                        | 1743 (1046-2404)           |                                 | 2 (1-3)                            |                                         | 1552 (931-2140)      |                           | 2 (1-3)                      |                                   |
| 2009 | China                    | 8067 (5720-8407)          |                                | 10 (7-11)                         |                                        | 1710 (1027-2359)           |                                 | 2 (1-3)                            |                                         | 1523 (914-2100)      |                           | 2 (1-3)                      |                                   |
| 2010 | China                    | 7614 (5399-7934)          |                                | 10 (7-10)                         |                                        | 1681 (1009-2318)           |                                 | 2 (1-3)                            |                                         | 1496 (898-2064)      |                           | 2 (1-3)                      |                                   |
| 2011 | China                    | 7019 (4977-7315)          |                                | 9 (6-9)                           |                                        | 1579 (947-2177)            |                                 | 2 (1-3)                            |                                         | 1405 (844-1938)      |                           | 2 (1-3)                      |                                   |
| 2012 | China                    | 6490 (4602-6763)          |                                | 8 (6-9)                           |                                        | 1427 (856-1968)            |                                 | 2 (1-2)                            |                                         | 1270 (763-1752)      |                           | 2 (1-2)                      |                                   |
| 2013 | China                    | 6012 (4263-6265)          |                                | 7 (5-8)                           |                                        | 1306 (784-1802)            |                                 | 2 (1-2)                            |                                         | 1163 (698-1604)      |                           | 1 (1-2)                      |                                   |
| 2014 | China                    | 5545 (3932-5779)          |                                | 7 (5-7)                           |                                        | 1176 (706-1621)            |                                 | 1 (1-2)                            |                                         | 1047 (628-1443)      |                           | 1 (1-2)                      |                                   |
| 2015 | China                    | 5257 (3728-5479)          | 6 (4-6)                        | 6 (5-7)                           | 0 (0-0)                                | 1114 (669-1537)            | 1 (1-2)                         | 1 (1-2)                            | 0 (0-0)                                 | 992 (595-1368)       | 1 (1-2)                   | 1 (1-2)                      | 0 (0-0)                           |
| 2000 | Colombia                 | 906 (643-945)             |                                | 22 (16-23)                        |                                        | 145 (26-473)               |                                 | 4 (1-12)                           |                                         | 129 (23-421)         |                           | 3 (1-10)                     |                                   |
| 2001 | Colombia                 | 755 (556-818)             |                                | 15 (14-20)                        |                                        | 135 (26-433)               |                                 | 3 (1-11)                           |                                         | 119 (22-385)         |                           | 3 (1-10)                     |                                   |
| 2002 | Colombia                 | 623 (442-649)             |                                | 15 (11-16)                        |                                        | 137 (26-441)               |                                 | 3 (1-11)                           |                                         | 122 (23-393)         |                           | 3 (1-10)                     |                                   |
| 2003 | Colombia                 | 691 (490-720)             |                                | 17 (12-18)                        |                                        | 145 (29-464)               |                                 | 4 (1-11)                           |                                         | 129 (26-413)         |                           | 3 (1-10)                     |                                   |
| 2004 | Colombia                 | 700 (496-729)             |                                | 17 (12-18)                        |                                        | 135 (28-425)               |                                 | 3 (1-11)                           |                                         | 120 (25-379)         |                           | 3 (1-9)                      |                                   |
| 2005 | Colombia                 | 681 (483-709)             |                                | 17 (12-18)                        |                                        | 149 (32-468)               |                                 | 4 (1-12)                           |                                         | 133 (28-417)         |                           | 3 (1-10)                     |                                   |
| 2006 | Colombia                 | 711 (504-741)             |                                | 18 (12-18)                        |                                        | 142 (31-444)               |                                 | 4 (1-11)                           |                                         | 127 (27-395)         |                           | 3 (1-10)                     |                                   |
| 2007 | Colombia                 | 659 (468-687)             |                                | 16 (12-17)                        |                                        | 104 (23-324)               |                                 | 3 (1-8)                            |                                         | 93 (20-289)          |                           | 2 (0-7)                      |                                   |
| 2008 | Colombia                 | 558 (403-592)             |                                | 14 (10-15)                        |                                        | 96 (21-299)                |                                 | 2 (1-8)                            |                                         | 86 (19-266)          |                           | 2 (0-7)                      |                                   |
| 2009 | Colombia                 | 534 (379-557)             |                                | 14 (10-14)                        |                                        | 96 (21-297)                |                                 | 2 (1-8)                            |                                         | 86 (19-265)          |                           | 2 (0-7)                      |                                   |
| 2010 | Colombia                 | 456 (323-475)             |                                | 12 (8-12)                         |                                        | 73 (16-225)                |                                 | 2 (0-6)                            |                                         | 65 (14-200)          |                           | 2 (0-5)                      |                                   |
| 2011 | Colombia                 | 424 (301-442)             |                                | 11 (8-12)                         |                                        | 58 (13-179)                |                                 | 2 (0-5)                            |                                         | 52 (12-160)          |                           | 1 (0-4)                      |                                   |
| 2012 | Colombia                 | 325 (231-339)             |                                | 9 (6-9)                           |                                        | 35 (8-107)                 |                                 | 1 (0-3)                            |                                         | 31 (7-95)            |                           | 1 (0-3)                      |                                   |
| 2013 | Colombia                 | 278 (197-289)             |                                | 7 (5-8)                           |                                        | 37 (8-112)                 |                                 | 1 (0-3)                            |                                         | 33 (7-100)           |                           | 1 (0-3)                      |                                   |
| 2014 | Colombia                 | 200 (142-208)             |                                | 5 (4-6)                           |                                        | 26 (6-79)                  |                                 | 1 (0-2)                            |                                         | 23 (5-70)            |                           | 1 (0-2)                      |                                   |
| 2015 | Colombia                 | 166 (118-173)             | 0 (0-0)                        | 5 (3-5)                           | 0 (0-0)                                | 22 (5-66)                  | 0 (0-0)                         | 0 (0-2)                            | 0 (0-0)                                 | 19 (4-58)            | 0 (0-0)                   | 1 (0-2)                      | 0 (0-0)                           |
| 2000 | Comoros                  | 89 (63-93)                |                                | 101 (71-105)                      |                                        | 16 (7-33)                  |                                 | 18 (8-38)                          |                                         | 5 (2-10)             |                           | 6 (3-12)                     |                                   |
| 2001 | Comoros                  | 90 (64-94)                |                                | 100 (71-105)                      |                                        | 16 (7-34)                  |                                 | 18 (8-38)                          |                                         | 5 (2-11)             |                           | 6 (2-12)                     |                                   |
| 2002 | Comoros                  | 93 (66-97)                |                                | 101 (72-105)                      |                                        | 17 (7-35)                  |                                 | 18 (8-38)                          |                                         | 5 (2-11)             |                           | 6 (2-12)                     |                                   |
| 2003 | Comoros                  | 94 (67-98)                |                                | 101 (71-105)                      |                                        | 17 (7-35)                  |                                 | 18 (8-38)                          |                                         | 5 (2-11)             |                           | 6 (2-12)                     |                                   |
| 2004 | Comoros                  | 95 (67-99)                |                                | 100 (71-104)                      |                                        | 17 (7-36)                  |                                 | 18 (7-39)                          |                                         | 5 (2-11)             |                           | 6 (2-12)                     |                                   |
| 2005 | Comoros                  | 94 (67-98)                |                                | 97 (69-102)                       |                                        | 17 (7-36)                  |                                 | 18 (7-37)                          |                                         | 5 (2-11)             |                           | 6 (2-12)                     |                                   |
| 2006 | Comoros                  | 93 (66-97)                |                                | 95 (67-99)                        |                                        | 17 (7-36)                  |                                 | 17 (7-36)                          |                                         | 5 (2-11)             |                           | 5 (2-11)                     |                                   |
| 2007 | Comoros                  | 92 (66-96)                |                                | 92 (65-96)                        |                                        | 17 (7-35)                  |                                 | 16 (7-35)                          |                                         | 5 (2-11)             |                           | 5 (2-11)                     |                                   |
| 2008 | Comoros                  | 92 (65-96)                |                                | 89 (63-93)                        |                                        | 16 (6-35)                  |                                 | 16 (6-34)                          |                                         | 5 (2-11)             |                           | 5 (2-11)                     |                                   |
| 2009 | Comoros                  | 90 (64-94)                |                                | 86 (61-89)                        |                                        | 16 (6-35)                  |                                 | 15 (6-33)                          |                                         | 5 (2-11)             |                           | 5 (2-10)                     |                                   |
| 2010 | Comoros                  | 88 (62-92)                |                                | 82 (58-86)                        |                                        | 16 (6-34)                  |                                 | 15 (6-32)                          |                                         | 5 (2-11)             |                           | 5 (2-10)                     |                                   |
| 2011 | Comoros                  | 86 (61-89)                |                                | 79 (56-82)                        |                                        | 15 (6-34)                  |                                 | 14 (5-31)                          |                                         | 5 (2-11)             |                           | 4 (2-10)                     |                                   |
| 2012 | Comoros                  | 83 (59-87)                |                                | 75 (53-78)                        |                                        | 15 (6-33)                  |                                 | 13 (5-29)                          |                                         | 5 (2-10)             |                           | 4 (2-9)                      |                                   |
| 2013 | Comoros                  | 81 (57-84)                |                                | 71 (51-74)                        |                                        | 15 (5-32)                  |                                 | 13 (5-28)                          |                                         | 5 (2-10)             |                           | 4 (1-9)                      |                                   |
| 2014 | Comoros                  | 79 (56-83)                |                                | 69 (49-71)                        |                                        | 14 (5-31)                  |                                 | 12 (5-27)                          |                                         | 4 (2-10)             |                           | 4 (1-9)                      |                                   |
| 2015 | Comoros                  | 77 (55-80)                | 0 (0-0)                        | 66 (47-68)                        | 0 (0-0)                                | 14 (4-32)                  | 0 (0-0)                         | 12 (4-27)                          | 0 (0-0)                                 | 12 (4-28)            | 0 (0-0)                   | 10 (3-24)                    | 0 (0-0)                           |
| 2000 | Congo                    | 650 (461-677)             |                                | 131 (93-136)                      |                                        | 83 (32-178)                |                                 | 17 (6-36)                          |                                         | 26 (10-56)           |                           | 5 (2-11)                     |                                   |
| 2001 | Congo                    | 673 (477-702)             |                                | 131 (93-137)                      |                                        | 86 (34-180)                |                                 | 17 (7-36)                          |                                         | 27 (11-58)           |                           | 5 (2-11)                     |                                   |
| 2002 | Congo                    | 676 (479-704)             |                                | 128 (91-134)                      |                                        | 87 (34-187)                |                                 | 17 (7-36)                          |                                         | 27 (11-59)           |                           | 5 (2-11)                     |                                   |
| 2003 | Congo                    | 663 (470-691)             |                                | 123 (87-128)                      |                                        |                            |                                 |                                    |                                         |                      |                           |                              |                                   |

| Year | Country       | Spn pneumonia deaths (UR) | Spn pneumonia deaths, HIV (UR) | Spn pneumonia mortality rate (UR) | Spn pneumonia mortality rate, HIV (UR) | Spn meningitis deaths (UR) | Spn meningitis deaths, HIV (UR) | Spn meningitis mortality rate (UR) | Spn meningitis mortality rate, HIV (UR) | Spn NPNM deaths (UR) | Spn NPNM deaths, HIV (UR) | Spn NPNM mortality rate (UR) | Spn NPNM mortality rate, HIV (UR) |
|------|---------------|---------------------------|--------------------------------|-----------------------------------|----------------------------------------|----------------------------|---------------------------------|------------------------------------|-----------------------------------------|----------------------|---------------------------|------------------------------|-----------------------------------|
| 2007 | Congo         | 567 (402-591)             |                                | 94 (66-98)                        |                                        | 77 (32-182)                |                                 | 13 (5-27)                          |                                         | 24 (10-51)           |                           | 4 (2-8)                      |                                   |
| 2008 | Congo         | 535 (379-557)             |                                | 86 (61-89)                        |                                        | 72 (25-156)                |                                 | 11 (4-25)                          |                                         | 64 (22-139)          |                           | 10 (4-22)                    |                                   |
| 2009 | Congo         | 498 (353-519)             |                                | 77 (55-81)                        |                                        | 66 (23-143)                |                                 | 10 (4-22)                          |                                         | 59 (21-127)          |                           | 9 (3-20)                     |                                   |
| 2010 | Congo         | 462 (328-482)             |                                | 70 (49-73)                        |                                        | 60 (21-131)                |                                 | 9 (3-20)                           |                                         | 54 (19-116)          |                           | 8 (3-18)                     |                                   |
| 2011 | Congo         | 437 (310-455)             |                                | 64 (45-67)                        |                                        | 56 (20-121)                |                                 | 8 (3-18)                           |                                         | 50 (18-108)          |                           | 7 (3-16)                     |                                   |
| 2012 | Congo         | 403 (285-420)             |                                | 57 (41-60)                        |                                        | 51 (18-109)                |                                 | 7 (3-15)                           |                                         | 45 (16-97)           |                           | 6 (2-14)                     |                                   |
| 2013 | Congo         | 270 (192-282)             |                                | 38 (27-39)                        |                                        | 31 (11-68)                 |                                 | 4 (2-9)                            |                                         | 28 (10-60)           |                           | 4 (1-8)                      |                                   |
| 2014 | Congo         | 224 (159-234)             |                                | 31 (22-32)                        |                                        | 26 (9-56)                  |                                 | 4 (1-8)                            |                                         | 23 (8-50)            |                           | 3 (1-7)                      |                                   |
| 2015 | Congo         | 203 (144-212)             | 43 (31-45)                     | 27 (19-28)                        | 6 (4-6)                                | 24 (9-52)                  | 5 (2-11)                        | 3 (1-7)                            | 1 (0-1)                                 | 22 (8-47)            | 5 (2-10)                  | 3 (1-6)                      | 1 (0-1)                           |
| 2000 | Cook Islands  | 0 (0-0)                   |                                | 11 (8-12)                         |                                        | 0 (0-0)                    |                                 | 1 (1-2)                            |                                         | 0 (0-0)              |                           | 1 (1-2)                      |                                   |
| 2001 | Cook Islands  | 0 (0-0)                   |                                | 12 (8-12)                         |                                        | 0 (0-0)                    |                                 | 1 (1-2)                            |                                         | 0 (0-0)              |                           | 1 (1-2)                      |                                   |
| 2002 | Cook Islands  | 0 (0-0)                   |                                | 12 (8-12)                         |                                        | 0 (0-0)                    |                                 | 1 (1-3)                            |                                         | 0 (0-0)              |                           | 1 (1-2)                      |                                   |
| 2003 | Cook Islands  | 0 (0-0)                   |                                | 8 (6-8)                           |                                        | 0 (0-0)                    |                                 | 1 (0-2)                            |                                         | 0 (0-0)              |                           | 1 (0-2)                      |                                   |
| 2004 | Cook Islands  | 0 (0-0)                   |                                | 8 (6-8)                           |                                        | 0 (0-0)                    |                                 | 1 (0-2)                            |                                         | 0 (0-0)              |                           | 1 (0-2)                      |                                   |
| 2005 | Cook Islands  | 0 (0-0)                   |                                | 12 (8-12)                         |                                        | 0 (0-0)                    |                                 | 1 (1-2)                            |                                         | 0 (0-0)              |                           | 1 (1-2)                      |                                   |
| 2006 | Cook Islands  | 0 (0-0)                   |                                | 7 (5-8)                           |                                        | 0 (0-0)                    |                                 | 1 (0-2)                            |                                         | 0 (0-0)              |                           | 1 (0-1)                      |                                   |
| 2007 | Cook Islands  | 0 (0-0)                   |                                | 7 (5-7)                           |                                        | 0 (0-0)                    |                                 | 1 (0-1)                            |                                         | 0 (0-0)              |                           | 1 (0-1)                      |                                   |
| 2008 | Cook Islands  | 0 (0-0)                   |                                | 6 (5-7)                           |                                        | 0 (0-0)                    |                                 | 1 (0-1)                            |                                         | 0 (0-0)              |                           | 1 (0-1)                      |                                   |
| 2009 | Cook Islands  | 0 (0-0)                   |                                | 7 (5-7)                           |                                        | 0 (0-0)                    |                                 | 1 (1-3)                            |                                         | 0 (0-0)              |                           | 1 (1-2)                      |                                   |
| 2010 | Cook Islands  | 0 (0-0)                   |                                | 6 (5-7)                           |                                        | 0 (0-0)                    |                                 | 2 (1-3)                            |                                         | 0 (0-0)              |                           | 1 (1-2)                      |                                   |
| 2011 | Cook Islands  | 0 (0-0)                   |                                | 6 (4-6)                           |                                        | 0 (0-0)                    |                                 | 1 (1-3)                            |                                         | 0 (0-0)              |                           | 1 (1-2)                      |                                   |
| 2012 | Cook Islands  | 0 (0-0)                   |                                | 3 (2-3)                           |                                        | 0 (0-0)                    |                                 | 1 (0-1)                            |                                         | 0 (0-0)              |                           | 1 (0-1)                      |                                   |
| 2013 | Cook Islands  | 0 (0-0)                   |                                | 3 (2-3)                           |                                        | 0 (0-0)                    |                                 | 1 (0-1)                            |                                         | 0 (0-0)              |                           | 1 (0-1)                      |                                   |
| 2014 | Cook Islands  | 0 (0-0)                   |                                | 3 (2-3)                           |                                        | 0 (0-0)                    |                                 | 1 (0-1)                            |                                         | 0 (0-0)              |                           | 1 (0-1)                      |                                   |
| 2015 | Cook Islands  | 0 (0-0)                   | 0 (0-0)                        | 3 (2-3)                           | 0 (0-0)                                | 3 (2-3)                    | 0 (0-0)                         | 1 (0-1)                            | 0 (0-0)                                 | 0 (0-0)              | 0 (0-0)                   | 1 (0-1)                      | 0 (0-0)                           |
| 2000 | Costa Rica    | 24 (17-25)                |                                | 6 (4-6)                           |                                        | 4 (1-10)                   |                                 | 1 (0-3)                            |                                         | 3 (1-9)              |                           | 1 (0-2)                      |                                   |
| 2001 | Costa Rica    | 19 (14-20)                |                                | 5 (4-5)                           |                                        | 3 (1-8)                    |                                 | 1 (0-2)                            |                                         | 3 (1-8)              |                           | 1 (0-2)                      |                                   |
| 2002 | Costa Rica    | 17 (12-18)                |                                | 4 (3-5)                           |                                        | 6 (2-17)                   |                                 | 2 (0-5)                            |                                         | 5 (2-15)             |                           | 1 (0-4)                      |                                   |
| 2003 | Costa Rica    | 15 (10-15)                |                                | 4 (3-4)                           |                                        | 2 (1-6)                    |                                 | 1 (0-2)                            |                                         | 2 (1-5)              |                           | 0 (0-1)                      |                                   |
| 2004 | Costa Rica    | 14 (10-14)                |                                | 4 (3-4)                           |                                        | 1 (0-4)                    |                                 | 0 (0-1)                            |                                         | 1 (0-3)              |                           | 0 (0-1)                      |                                   |
| 2005 | Costa Rica    | 17 (12-18)                |                                | 5 (3-5)                           |                                        | 3 (1-8)                    |                                 | 1 (0-2)                            |                                         | 3 (1-7)              |                           | 1 (0-2)                      |                                   |
| 2006 | Costa Rica    | 10 (7-10)                 |                                | 3 (2-3)                           |                                        | 3 (1-7)                    |                                 | 1 (0-2)                            |                                         | 3 (1-6)              |                           | 1 (0-2)                      |                                   |
| 2007 | Costa Rica    | 13 (9-14)                 |                                | 4 (3-4)                           |                                        | 3 (1-8)                    |                                 | 1 (0-2)                            |                                         | 3 (1-7)              |                           | 1 (0-2)                      |                                   |
| 2008 | Costa Rica    | 8 (6-9)                   |                                | 2 (2-2)                           |                                        | 4 (1-12)                   |                                 | 1 (0-3)                            |                                         | 4 (1-10)             |                           | 1 (0-3)                      |                                   |
| 2009 | Costa Rica    | 8 (5-8)                   |                                | 2 (2-2)                           |                                        | 3 (1-8)                    |                                 | 1 (0-2)                            |                                         | 3 (1-8)              |                           | 1 (0-2)                      |                                   |
| 2010 | Costa Rica    | 8 (6-9)                   |                                | 2 (2-2)                           |                                        | 3 (1-7)                    |                                 | 1 (0-2)                            |                                         | 2 (1-6)              |                           | 1 (0-2)                      |                                   |
| 2011 | Costa Rica    | 8 (6-8)                   |                                | 2 (2-2)                           |                                        | 3 (1-8)                    |                                 | 1 (0-2)                            |                                         | 2 (1-7)              |                           | 1 (0-2)                      |                                   |
| 2012 | Costa Rica    | 5 (3-5)                   |                                | 1 (1-1)                           |                                        | 3 (1-7)                    |                                 | 1 (0-2)                            |                                         | 2 (1-6)              |                           | 1 (0-2)                      |                                   |
| 2013 | Costa Rica    | 6 (4-6)                   |                                | 2 (1-2)                           |                                        | 1 (0-3)                    |                                 | 0 (0-1)                            |                                         | 1 (0-2)              |                           | 0 (0-1)                      |                                   |
| 2014 | Costa Rica    | 3 (2-4)                   |                                | 1 (1-1)                           |                                        | 1 (0-3)                    |                                 | 0 (0-1)                            |                                         | 1 (0-2)              |                           | 0 (0-1)                      |                                   |
| 2015 | Costa Rica    | 3 (2-3)                   | 0 (0-0)                        | 1 (1-1)                           | 0 (0-0)                                | 1 (0-2)                    | 0 (0-0)                         | 0 (0-1)                            | 0 (0-0)                                 | 1 (0-2)              | 0 (0-0)                   | 0 (0-1)                      | 0 (0-0)                           |
| 2000 | Cote d'Ivoire | 2369 (1680-2468)          |                                | 85 (60-88)                        |                                        | 335 (126-736)              |                                 | 12 (4-26)                          |                                         | 105 (40-231)         |                           | 4 (1-8)                      |                                   |
| 2001 | Cote d'Ivoire | 2338 (1658-2436)          |                                | 81 (58-85)                        |                                        | 333 (125-734)              |                                 | 12 (4-26)                          |                                         | 105 (39-231)         |                           | 4 (1-8)                      |                                   |
| 2002 | Cote d'Ivoire | 2286 (1621-2383)          |                                | 78 (56-82)                        |                                        | 329 (122-724)              |                                 | 11 (4-25)                          |                                         | 103 (38-228)         |                           | 4 (1-8)                      |                                   |
| 2003 | Cote d'Ivoire | 2237 (1586-2331)          |                                | 76 (54-79)                        |                                        | 324 (120-715)              |                                 | 11 (4-24)                          |                                         | 102 (36-225)         |                           | 3 (1-8)                      |                                   |
| 2004 | Cote d'Ivoire | 2179 (1545-2271)          |                                | 73 (52-76)                        |                                        | 317 (117-701)              |                                 | 11 (4-23)                          |                                         | 100 (37-220)         |                           | 3 (1-7)                      |                                   |
| 2005 | Cote d'Ivoire | 2200 (1560-2293)          |                                | 73 (52-76)                        |                                        | 321 (118-710)              |                                 | 11 (4-23)                          |                                         | 101 (37-223)         |                           | 3 (1-7)                      |                                   |
| 2006 | Cote d'Ivoire | 2260 (1602-2355)          |                                | 74 (52-77)                        |                                        | 329 (120-728)              |                                 | 11 (4-24)                          |                                         | 103 (38-229)         |                           | 3 (1-7)                      |                                   |
| 2007 | Cote d'Ivoire | 2392 (1696-2493)          |                                | 77 (55-81)                        |                                        | 347 (128-767)              |                                 | 11 (4-25)                          |                                         | 109 (40-241)         |                           | 4 (1-8)                      |                                   |
| 2008 | Cote d'Ivoire | 2506 (1777-2611)          |                                | 80 (57-83)                        |                                        | 363 (134-801)              |                                 | 12 (4-26)                          |                                         | 114 (42-252)         |                           | 4 (1-8)                      |                                   |
| 2009 | Cote d'Ivoire | 2734 (1938-2849)          |                                | 86 (61-89)                        |                                        | 396 (147-872)              |                                 | 12 (5-27)                          |                                         | 124 (46-274)         |                           | 4 (1-9)                      |                                   |
| 2010 | Cote d'Ivoire | 2940 (2085-3064)          |                                | 91 (64-94)                        |                                        | 425 (159-935)              |                                 | 13 (5-29)                          |                                         | 134 (50-294)         |                           | 4 (2-9)                      |                                   |
| 2011 | Cote d'Ivoire | 3131 (2220-3263)          |                                | 95 (67-99)                        |                                        | 452 (170-992)              |                                 | 14 (5-30)                          |                                         | 142 (53-312)         |                           | 4 (2-9)                      |                                   |
| 2012 | Cote d'Ivoire | 3241 (2298-3378)          |                                | 96 (68-100)                       |                                        | 467 (175-1023)             |                                 | 14 (5-30)                          |                                         | 147 (55-322)         |                           | 4 (2-10)                     |                                   |
| 2013 | Cote d'Ivoire | 3375 (2393-3517)          |                                | 98 (69-102)                       |                                        | 484 (183-1060)             |                                 | 14 (5-31)                          |                                         | 152 (57-333)         |                           | 4 (2-10)                     |                                   |
| 2014 | Cote d'Ivoire | 3426 (2429-3571)          |                                | 97 (69-101)                       |                                        | 491 (186-1072)             |                                 | 14 (5-30)                          |                                         | 154 (59-337)         |                           | 4 (2-10)                     |                                   |
| 2015 | Cote d'Ivoire | 2525 (1791-2632)          | 366 (259-381)                  | 70 (50-73)                        | 10 (7-11)                              | 343 (131-748)              | 50 (19-108)                     | 10 (4-21)                          | 1 (1-3)                                 | 108 (41-235)         | 16 (6-34)                 | 3 (1-7)                      | 0 (0-1)                           |
| 2000 | Croatia       | 4 (1-4)                   |                                | 2 (1-2)                           |                                        | 2 (1-3)                    |                                 | 1 (0-1)                            |                                         | 1 (1-3)              |                           | 1 (0-1)                      |                                   |
| 2001 | Croatia       | 2 (2-3)                   |                                | 1 (1-1)                           |                                        | 2 (1-3)                    |                                 | 1 (0-1)                            |                                         | 2 (1-3)              |                           | 1 (0-1)                      |                                   |
| 2002 | Croatia       | 1 (1-2)                   |                                | 1 (0-1)                           |                                        | 2 (1-4)                    |                                 | 1 (0-2)                            |                                         | 2 (1-3)              |                           | 1 (0-1)                      |                                   |
| 2003 | Croatia       | 3 (2-3)                   |                                | 1 (1-1)                           |                                        | 1 (0-2)                    |                                 | 0 (0-1)                            |                                         | 1 (0-2)              |                           | 0 (0-1)                      |                                   |
| 2004 | Croatia       | 1 (0-1)                   |                                | 0 (0-0)                           |                                        | 0 (0-1)                    |                                 | 0 (0-0)                            |                                         | 0 (0-1)              |                           | 0 (0-0)                      |                                   |
| 2005 | Croatia       | 3 (2-4)                   |                                | 2 (1-2)                           |                                        | 3 (1-5)                    |                                 | 1 (1-3)                            |                                         | 3 (1-5)              |                           | 1 (1-2)                      |                                   |
| 2006 | Croatia       | 2 (2-2)                   |                                | 1 (1-1)                           |                                        | 0 (0-0)                    |                                 | 0 (0-0)                            |                                         | 0 (0-1)              |                           | 0 (0-0)                      |                                   |
| 2007 | Croatia       | 3 (2-3)                   |                                | 2 (1-2)                           |                                        | 0 (0-0)                    |                                 | 0 (0-0)                            |                                         | 0 (0-0)              |                           | 0 (0-0)                      |                                   |
| 2008 | Croatia       | 2 (2-2)                   |                                | 1 (1-1)                           |                                        | 1 (1-2)                    |                                 | 1 (0-1)                            |                                         | 1 (1-2)              |                           | 1 (0-1)                      |                                   |
| 2009 | Croatia       | 2 (1-2)                   |                                | 1 (1-1)                           |                                        | 2 (1-4)                    |                                 | 1 (0-2)                            |                                         | 2 (1-3)              |                           | 1 (0-2)                      |                                   |
| 2010 | Croatia       | 2 (1-2)                   |                                | 1 (1-1)                           |                                        | 2 (1-4)                    |                                 | 1 (0-2)                            |                                         | 2 (1-3)              |                           | 1 (0-2)                      |                                   |
| 2011 | Croatia       | 0 (0-0)                   |                                | 0 (0-0)                           |                                        | 2 (1-3)                    |                                 | 1 (0-1)                            |                                         | 2 (1-3)              |                           | 1 (0-1)                      |                                   |
| 2012 | Croatia       | 1 (0-1)                   |                                | 0 (0-0)                           |                                        | 3 (1-5)                    |                                 | 1 (1-2)                            |                                         | 3 (1-5)              |                           | 1 (1-2)                      |                                   |
| 2013 | Croatia       | 3 (2-3)                   |                                | 1 (1-1)                           |                                        | 1 (1-1)                    |                                 | 0 (0-1)                            |                                         | 1 (0-2)              |                           | 0 (0-1)                      |                                   |
| 2014 | Croatia       | 1 (1-1)                   |                                | 1 (0-1)                           |                                        | 2 (1-3)                    |                                 | 1 (0-1)                            |                                         | 1 (1-3)              |                           | 1 (0-1)                      |                                   |
| 2015 | Croatia       | 1 (1-1)                   | 0 (0-0)                        | 0 (0-0)                           | 0 (0-0)                                | 2 (1-3)                    | 0 (0-0)                         | 1 (0-1)                            | 0 (0-0)                                 | 1 (1-2)              | 0 (0-0)                   | 1 (0-1)                      | 0 (0-0)                           |
| 2000 | Cuba          | 26 (19-27)                |                                | 4 (3-4)                           |                                        | 24 (12-45)                 |                                 | 3 (2-6)                            |                                         | 22 (11-40)           |                           | 3 (1-5)                      |                                   |
| 2001 | Cuba          | 26 (19-27)                |                                | 4 (3-4)                           |                                        | 18 (9-33)                  |                                 | 2 (1-5)                            |                                         | 16 (8-30)            |                           | 2 (1-4)                      |                                   |
| 2002 | Cuba          | 22 (16-23)                |                                | 3 (2-3)                           |                                        | 9 (5-17)                   |                                 | 1 (1-2)                            |                                         | 8 (4-15)             |                           | 1 (1-2)                      |                                   |
| 2003 | Cuba          | 20 (14-21)                |                                | 3 (2-3)                           |                                        | 14 (7-26)                  |                                 | 2 (1-4)                            |                                         | 12 (6-23)            |                           | 2 (1-3)                      |                                   |
| 2004 | Cuba          | 18 (13-19)                |                                | 3 (2-3)                           |                                        | 11 (6-20)                  |                                 | 2 (1-3)                            |                                         | 10 (5-18)            |                           | 1 (1-3)                      |                                   |
| 2005 | Cuba          | 23 (17-24)                |                                | 3 (2-4)                           |                                        | 14 (7-25)                  |                                 | 2 (1-4)                            |                                         | 12 (6-23)            |                           | 2 (1-3)                      |                                   |
| 2006 | Cuba          | 25 (17-26)                |                                | 4 (3-4)                           |                                        | 11 (6-21)                  |                                 | 2 (1-3)                            |                                         | 10 (5-18)            |                           | 2 (1-3)                      |                                   |
| 2007 | Cuba          | 21 (15-21)                |                                | 3 (2-3)                           |                                        | 8 (4-15)                   |                                 | 1 (1-2)                            |                                         | 7 (4-14)             |                           | 1 (1-2)                      |                                   |
| 2008 | Cuba          | 17 (12-18)                |                                | 3 (2-3)                           |                                        | 11 (6-20)                  |                                 | 2 (1-3)                            |                                         | 10 (5-18)            |                           | 2 (1-3)                      |                                   |
| 2009 | Cuba          | 29 (20-30)                |                                | 5 (3-5)                           |                                        | 7 (3-13)                   |                                 | 1 (1-2)                            |                                         | 6 (3-11)             |                           | 1 (0-2)                      |                                   |
| 2010 | Cuba          | 20 (14-21)                |                                | 3 (2-3)                           |                                        | 8 (4-14)                   |                                 | 1 (1-2)                            |                                         | 7 (3-12)             |                           | 1 (1-2)                      |                                   |
| 2011 | Cuba          | 22 (15-23)                |                                | 4 (3-4)                           |                                        | 11 (6-20)                  |                                 | 2 (1-3)                            |                                         | 10 (5-18)            |                           | 2 (1-3)                      |                                   |
| 2012 | Cuba          | 24 (17-25)                |                                | 4 (3-4)                           |                                        | 11 (6-22)                  |                                 | 2 (1-4)                            |                                         | 10 (5-20)            |                           | 2 (1-3)                      |                                   |
| 2013 | Cuba          | 24 (17-25)                |                                | 4 (3-4)                           |                                        | 8 (4-15)                   |                                 | 1 (1-3)                            |                                         | 7 (3-14)             |                           | 1 (1-2)                      |                                   |
| 2014 | Cuba          | 22 (16-23)                |                                | 4 (3-4)                           |                                        | 9 (4-19)                   |                                 | 2 (1-3)                            |                                         | 8 (4-17)             |                           | 1 (1-3)                      |                                   |

Spn = *Streptococcus pneumoniae*; npnm = non-pneumonia, non-meningitis; HIV = deaths only in HIV-infected children; Uncertainty range provided in parentheses.

| Year | Country                               | Spn pneumonia deaths<br>(UR) | Spn pneumonia deaths,<br>HIV (UR) | Spn pneumonia<br>mortality rate (UR) | Spn pneumonia<br>mortality rate, HIV (UR) | Spn meningitis deaths<br>(UR) | Spn meningitis deaths,<br>HIV (UR) | Spn meningitis<br>mortality rate (UR) | Spn meningitis<br>mortality rate, HIV (UR) | Spn NPnm deaths (UR) | Spn NPnm deaths, HIV<br>(UR) | Spn NPnm mortality<br>rate (UR) | Spn NPnm mortality<br>rate, HIV (UR) |
|------|---------------------------------------|------------------------------|-----------------------------------|--------------------------------------|-------------------------------------------|-------------------------------|------------------------------------|---------------------------------------|--------------------------------------------|----------------------|------------------------------|---------------------------------|--------------------------------------|
| 2015 | Cuba                                  | 22 (16-23)                   |                                   | 0 (0-0)                              | 4 (3-4)                                   | 0 (0-0)                       | 9 (4-19)                           | 0 (0-0)                               | 2 (1-3)                                    | 8 (4-17)             |                              | 1 (1-3)                         | 0 (0-0)                              |
| 2000 | Cyprus                                | 1 (1-1)                      |                                   |                                      | 2 (1-2)                                   |                               | 1 (0-1)                            |                                       | 1 (1-2)                                    | 1 (0-1)              |                              | 1 (1-1)                         |                                      |
| 2001 | Cyprus                                | 1 (1-1)                      |                                   |                                      | 2 (1-2)                                   |                               | 1 (0-1)                            |                                       | 1 (1-1)                                    | 1 (0-1)              |                              | 1 (1-1)                         |                                      |
| 2002 | Cyprus                                | 1 (1-1)                      |                                   |                                      | 2 (1-2)                                   |                               | 1 (0-1)                            |                                       | 1 (1-1)                                    | 1 (0-1)              |                              | 1 (1-1)                         |                                      |
| 2003 | Cyprus                                | 1 (1-1)                      |                                   |                                      | 2 (1-2)                                   |                               | 1 (0-1)                            |                                       | 1 (1-1)                                    | 1 (0-1)              |                              | 1 (1-1)                         |                                      |
| 2004 | Cyprus                                | 1 (1-1)                      |                                   |                                      | 1 (1-2)                                   |                               | 1 (0-1)                            |                                       | 1 (1-1)                                    | 0 (0-1)              |                              | 1 (1-1)                         |                                      |
| 2005 | Cyprus                                | 1 (1-1)                      |                                   |                                      | 1 (1-1)                                   |                               | 0 (0-1)                            |                                       | 1 (0-1)                                    | 0 (0-1)              |                              | 1 (0-1)                         |                                      |
| 2006 | Cyprus                                | 1 (1-1)                      |                                   |                                      | 1 (1-1)                                   |                               | 0 (0-1)                            |                                       | 1 (0-1)                                    | 0 (0-1)              |                              | 1 (0-1)                         |                                      |
| 2007 | Cyprus                                | 1 (0-1)                      |                                   |                                      | 1 (1-1)                                   |                               | 0 (0-1)                            |                                       | 1 (0-1)                                    | 0 (0-0)              |                              | 1 (0-1)                         |                                      |
| 2008 | Cyprus                                | 1 (0-1)                      |                                   |                                      | 1 (1-1)                                   |                               | 0 (0-1)                            |                                       | 1 (0-1)                                    | 0 (0-0)              |                              | 1 (0-1)                         |                                      |
| 2009 | Cyprus                                | 1 (0-1)                      |                                   |                                      | 1 (1-1)                                   |                               | 0 (0-1)                            |                                       | 1 (0-1)                                    | 0 (0-0)              |                              | 0 (0-1)                         |                                      |
| 2010 | Cyprus                                | 0 (0-0)                      |                                   |                                      | 1 (1-1)                                   |                               | 0 (0-0)                            |                                       | 0 (0-1)                                    | 0 (0-0)              |                              | 0 (0-1)                         |                                      |
| 2011 | Cyprus                                | 0 (0-0)                      |                                   |                                      | 1 (0-1)                                   |                               | 0 (0-0)                            |                                       | 0 (0-1)                                    | 0 (0-0)              |                              | 0 (0-0)                         |                                      |
| 2012 | Cyprus                                | 0 (0-0)                      |                                   |                                      | 1 (0-1)                                   |                               | 0 (0-0)                            |                                       | 0 (0-1)                                    | 0 (0-0)              |                              | 0 (0-0)                         |                                      |
| 2013 | Cyprus                                | 0 (0-0)                      |                                   |                                      | 1 (0-1)                                   |                               | 0 (0-0)                            |                                       | 0 (0-0)                                    | 0 (0-0)              |                              | 0 (0-0)                         |                                      |
| 2014 | Cyprus                                | 0 (0-0)                      |                                   |                                      | 1 (0-1)                                   |                               | 0 (0-0)                            |                                       | 0 (0-0)                                    | 0 (0-0)              |                              | 0 (0-0)                         |                                      |
| 2015 | Cyprus                                | 0 (0-0)                      | 0 (0-0)                           |                                      | 0 (0-0)                                   | 0 (0-0)                       | 0 (0-0)                            | 0 (0-0)                               | 0 (0-0)                                    | 0 (0-0)              | 0 (0-0)                      | 0 (0-0)                         | 0 (0-0)                              |
| 2000 | Czech Republic                        | 6 (4-6)                      |                                   |                                      | 1 (1-1)                                   |                               | 2 (1-4)                            |                                       | 1 (0-1)                                    | 2 (1-4)              |                              | 0 (0-1)                         |                                      |
| 2001 | Czech Republic                        | 7 (5-7)                      |                                   |                                      | 2 (1-2)                                   |                               | 2 (1-4)                            |                                       | 1 (0-1)                                    | 2 (1-4)              |                              | 1 (0-1)                         |                                      |
| 2002 | Czech Republic                        | 8 (6-8)                      |                                   |                                      | 2 (1-2)                                   |                               | 2 (1-3)                            |                                       | 0 (0-1)                                    | 1 (1-3)              |                              | 0 (0-1)                         |                                      |
| 2003 | Czech Republic                        | 8 (6-8)                      |                                   |                                      | 2 (1-2)                                   |                               | 2 (1-3)                            |                                       | 0 (0-1)                                    | 2 (1-3)              |                              | 0 (0-1)                         |                                      |
| 2004 | Czech Republic                        | 5 (4-6)                      |                                   |                                      | 1 (1-1)                                   |                               | 4 (2-8)                            |                                       | 1 (0-2)                                    | 4 (2-7)              |                              | 1 (0-2)                         |                                      |
| 2005 | Czech Republic                        | 7 (5-8)                      |                                   |                                      | 2 (1-2)                                   |                               | 3 (1-5)                            |                                       | 1 (0-1)                                    | 2 (1-4)              |                              | 1 (0-1)                         |                                      |
| 2006 | Czech Republic                        | 10 (7-11)                    |                                   |                                      | 2 (1-2)                                   |                               | 1 (0-2)                            |                                       | 0 (0-0)                                    | 1 (0-2)              |                              | 0 (0-0)                         |                                      |
| 2007 | Czech Republic                        | 9 (7-10)                     |                                   |                                      | 2 (1-2)                                   |                               | 5 (2-9)                            |                                       | 1 (0-2)                                    | 4 (2-8)              |                              | 1 (0-1)                         |                                      |
| 2008 | Czech Republic                        | 8 (6-8)                      |                                   |                                      | 1 (1-2)                                   |                               | 2 (1-3)                            |                                       | 0 (0-1)                                    | 2 (1-3)              |                              | 0 (0-1)                         |                                      |
| 2009 | Czech Republic                        | 6 (4-6)                      |                                   |                                      | 1 (1-1)                                   |                               | 4 (2-8)                            |                                       | 1 (0-1)                                    | 4 (2-7)              |                              | 1 (0-1)                         |                                      |
| 2010 | Czech Republic                        | 11 (8-12)                    |                                   |                                      | 2 (1-2)                                   |                               | 1 (1-3)                            |                                       | 0 (0-0)                                    | 1 (1-2)              |                              | 0 (0-0)                         |                                      |
| 2011 | Czech Republic                        | 7 (5-8)                      |                                   |                                      | 1 (1-1)                                   |                               | 3 (1-5)                            |                                       | 0 (0-1)                                    | 2 (1-4)              |                              | 0 (0-1)                         |                                      |
| 2012 | Czech Republic                        | 8 (6-8)                      |                                   |                                      | 1 (1-1)                                   |                               | 2 (1-3)                            |                                       | 0 (0-1)                                    | 1 (1-3)              |                              | 0 (0-0)                         |                                      |
| 2013 | Czech Republic                        | 10 (7-11)                    |                                   |                                      | 2 (1-2)                                   |                               | 2 (1-4)                            |                                       | 0 (0-1)                                    | 2 (1-3)              |                              | 0 (0-1)                         |                                      |
| 2014 | Czech Republic                        | 8 (5-8)                      |                                   |                                      | 1 (1-1)                                   |                               | 2 (1-3)                            |                                       | 0 (0-1)                                    | 2 (1-3)              |                              | 0 (0-1)                         |                                      |
| 2015 | Czech Republic                        | 7 (5-8)                      | 0 (0-0)                           |                                      | 1 (1-1)                                   | 0 (0-0)                       | 2 (1-3)                            | 0 (0-0)                               | 0 (0-1)                                    | 2 (1-3)              | 0 (0-0)                      | 0 (0-1)                         | 0 (0-0)                              |
| 2000 | Democratic People's Republic of Korea | 1380 (978-1438)              |                                   |                                      | 71 (50-74)                                |                               | 310 (148-481)                      |                                       | 16 (8-25)                                  | 276 (132-429)        |                              | 14 (7-22)                       |                                      |
| 2001 | Democratic People's Republic of Korea | 1126 (799-1174)              |                                   |                                      | 59 (42-61)                                |                               | 253 (122-397)                      |                                       | 13 (6-21)                                  | 225 (109-354)        |                              | 12 (6-19)                       |                                      |
| 2002 | Democratic People's Republic of Korea | 917 (650-956)                |                                   |                                      | 49 (34-51)                                |                               | 204 (102-316)                      |                                       | 11 (5-17)                                  | 181 (91-282)         |                              | 10 (5-15)                       |                                      |
| 2003 | Democratic People's Republic of Korea | 762 (540-794)                |                                   |                                      | 40 (29-42)                                |                               | 166 (87-264)                       |                                       | 9 (5-14)                                   | 148 (77-235)         |                              | 8 (4-12)                        |                                      |
| 2004 | Democratic People's Republic of Korea | 659 (467-687)                |                                   |                                      | 35 (25-37)                                |                               | 140 (76-231)                       |                                       | 7 (4-12)                                   | 125 (66-206)         |                              | 7 (4-11)                        |                                      |
| 2005 | Democratic People's Republic of Korea | 613 (435-639)                |                                   |                                      | 33 (23-34)                                |                               | 128 (70-218)                       |                                       | 7 (4-12)                                   | 114 (62-194)         |                              | 6 (3-10)                        |                                      |
| 2006 | Democratic People's Republic of Korea | 598 (424-623)                |                                   |                                      | 33 (23-34)                                |                               | 122 (64-215)                       |                                       | 7 (4-12)                                   | 109 (57-192)         |                              | 6 (3-10)                        |                                      |
| 2007 | Democratic People's Republic of Korea | 593 (420-618)                |                                   |                                      | 33 (23-34)                                |                               | 119 (60-216)                       |                                       | 7 (3-12)                                   | 106 (54-193)         |                              | 6 (3-11)                        |                                      |
| 2008 | Democratic People's Republic of Korea | 574 (407-598)                |                                   |                                      | 33 (23-34)                                |                               | 114 (55-212)                       |                                       | 6 (3-12)                                   | 101 (49-188)         |                              | 6 (3-11)                        |                                      |
| 2009 | Democratic People's Republic of Korea | 557 (395-581)                |                                   |                                      | 32 (23-34)                                |                               | 109 (51-208)                       |                                       | 6 (3-12)                                   | 97 (46-185)          |                              | 6 (3-11)                        |                                      |
| 2010 | Democratic People's Republic of Korea | 536 (380-559)                |                                   |                                      | 32 (22-33)                                |                               | 104 (47-201)                       |                                       | 6 (3-12)                                   | 92 (42-179)          |                              | 5 (2-11)                        |                                      |
| 2011 | Democratic People's Republic of Korea | 517 (366-538)                |                                   |                                      | 31 (22-32)                                |                               | 99 (43-196)                        |                                       | 6 (3-12)                                   | 86 (38-174)          |                              | 5 (2-10)                        |                                      |
| 2012 | Democratic People's Republic of Korea | 498 (353-519)                |                                   |                                      | 30 (21-31)                                |                               | 94 (30-228)                        |                                       | 6 (2-14)                                   | 84 (27-203)          |                              | 5 (2-12)                        |                                      |
| 2013 | Democratic People's Republic of Korea | 487 (345-508)                |                                   |                                      | 29 (21-30)                                |                               | 91 (28-224)                        |                                       | 5 (2-13)                                   | 81 (25-200)          |                              | 5 (2-12)                        |                                      |
| 2014 | Democratic People's Republic of Korea | 475 (337-495)                |                                   |                                      | 28 (20-29)                                |                               | 88 (26-220)                        |                                       | 5 (1-13)                                   | 78 (23-195)          |                              | 5 (1-11)                        |                                      |
| 2015 | Democratic People's Republic of Korea | 458 (325-477)                | 0 (0-0)                           |                                      | 27 (19-28)                                | 0 (0-0)                       | 84 (23-212)                        | 0 (0-0)                               | 5 (1-11)                                   | 75 (21-189)          | 0 (0-0)                      | 4 (1-11)                        | 0 (0-0)                              |
| 2000 | Democratic Republic of the Congo      | 12202 (8652-12716)           |                                   |                                      | 137 (97-143)                              |                               | 2828 (1512-5354)                   |                                       | 32 (17-60)                                 | 889 (475-1683)       |                              | 10 (5-19)                       |                                      |
| 2001 | Democratic Republic of the Congo      | 11857 (8408-12357)           |                                   |                                      | 129 (91-134)                              |                               | 2769 (1488-5249)                   |                                       | 30 (16-57)                                 | 870 (468-1650)       |                              | 9 (5-18)                        |                                      |
| 2002 | Democratic Republic of the Congo      | 11727 (8316-12222)           |                                   |                                      | 124 (88-129)                              |                               | 2742 (1486-5205)                   |                                       | 29 (16-55)                                 | 862 (467-1636)       |                              | 9 (5-17)                        |                                      |
| 2003 | Democratic Republic of the Congo      | 11524 (8172-12010)           |                                   |                                      | 118 (84-123)                              |                               | 2679 (995-5827)                    |                                       | 27 (10-60)                                 | 842 (313-1832)       |                              | 9 (3-19)                        |                                      |
| 2004 | Democratic Republic of the Congo      | 11538 (8181-12024)           |                                   |                                      | 114 (81-119)                              |                               | 2666 (1002-5804)                   |                                       | 26 (10-58)                                 | 838 (315-1825)       |                              | 8 (3-18)                        |                                      |
| 2005 | Democratic Republic of the Congo      | 11112 (7879-11580)           |                                   |                                      | 107 (76-111)                              |                               | 2551 (969-5553)                    |                                       | 24 (9-53)                                  | 802 (305-1746)       |                              | 8 (3-17)                        |                                      |
| 2006 | Democratic Republic of the Congo      | 11369 (8062-11848)           |                                   |                                      | 105 (75-110)                              |                               | 2595 (969-5641)                    |                                       | 24 (9-52)                                  | 816 (313-1774)       |                              | 8 (3-16)                        |                                      |
| 2007 | Democratic Republic of the Congo      | 11434 (8107-11915)           |                                   |                                      | 103 (73-107)                              |                               | 2599 (1006-5635)                   |                                       | 23 (9-51)                                  | 817 (316-1772)       |                              | 7 (3-16)                        |                                      |
| 2008 | Democratic Republic of the Congo      | 12091 (8574-12601)           |                                   |                                      | 106 (75-110)                              |                               | 2735 (1053-5936)                   |                                       | 24 (9-52)                                  | 860 (331-1866)       |                              | 8 (3-16)                        |                                      |
| 2009 | Democratic Republic of the Congo      | 13436 (9527-14002)           |                                   |                                      | 115 (81-119)                              |                               | 3023 (1157-6567)                   |                                       | 26 (10-56)                                 | 950 (364-2065)       |                              | 8 (3-18)                        |                                      |
| 2010 | Democratic Republic of the Congo      | 14760 (10466-15382)          |                                   |                                      | 123 (87-128)                              |                               | 3299 (1257-7175)                   |                                       | 27 (10-60)                                 | 1037 (395-2256)      |                              | 9 (3-19)                        |                                      |
| 2011 | Democratic Republic of the Congo      | 16072 (11396-16749)          |                                   |                                      | 130 (92-135)                              |                               | 3563 (1363-7743)                   |                                       | 29 (11-63)                                 | 1120 (428-2434)      |                              | 9 (3-20)                        |                                      |
| 2012 | Democratic Republic of the Congo      | 16377 (11613-17068)          |                                   |                                      | 129 (92-135)                              |                               | 3572 (1371-7753)                   |                                       | 28 (11-61)                                 | 1123 (431-2438)      |                              | 9 (3-19)                        |                                      |
| 2013 | Democratic Republic of the Congo      | 15357 (10890-16005)          |                                   |                                      | 118 (84-123)                              |                               | 3291 (1268-7135)                   |                                       | 25 (10-55)                                 | 1035 (399-2243)      |                              | 8 (3-17)                        |                                      |
| 2014 | Democratic Republic of the Congo      | 13144 (9320-13698)           |                                   |                                      | 99 (70-103)                               |                               | 2750 (1059-5960)                   |                                       | 21 (8-45)                                  | 865 (333-1874)       |                              | 6 (3-14)                        |                                      |
| 2015 | Democratic Republic of the Congo      | 11423 (8100-11904)           | 754 (534-785)                     |                                      | 84 (59-87)                                | 6 (4-6)                       | 2374 (920-5138)                    | 157 (61-339)                          | 17 (7-38)                                  | 747 (289-1615)       | 49 (19-107)                  | 5 (2-12)                        | 0 (0-1)                              |
| 2000 | Denmark                               | 3 (2-3)                      |                                   |                                      | 1 (1-1)                                   |                               | 2 (1-4)                            |                                       | 1 (0-1)                                    | 2 (1-4)              |                              | 1 (0-1)                         |                                      |
| 2001 | Denmark                               | 3 (2-3)                      |                                   |                                      | 1 (1-1)                                   |                               | 3 (1-5)                            |                                       | 1 (0-2)                                    | 2 (1-5)              |                              | 1 (0-1)                         |                                      |
| 2002 | Denmark                               | 4 (3-4)                      |                                   |                                      | 1 (1-1)                                   |                               | 2 (1-4)                            |                                       | 1 (0-1)                                    | 2 (1-4)              |                              | 1 (0-1)                         |                                      |
| 2003 | Denmark                               | 4 (3-4)                      |                                   |                                      | 1 (1-1)                                   |                               | 2 (1-4)                            |                                       | 1 (0-1)                                    | 2 (1-4)              |                              | 1 (0-1)                         |                                      |
| 2004 | Denmark                               | 2 (1-2)                      |                                   |                                      | 1 (0-1)                                   |                               | 3 (1-5)                            |                                       | 1 (0-1)                                    | 2 (1-4)              |                              | 1 (0-1)                         |                                      |
| 2005 | Denmark                               | 3 (2-3)                      |                                   |                                      | 1 (1-1)                                   |                               | 1 (1-2)                            |                                       | 0 (0-1)                                    | 1 (1-2)              |                              | 0 (0-1)                         |                                      |
| 2006 | Denmark                               | 1 (1-1)                      |                                   |                                      | 0 (0-0)                                   |                               | 1 (0-1)                            |                                       | 0 (0-0)                                    | 0 (0-1)              |                              | 0 (0-0)                         |                                      |
| 2007 | Denmark                               | 0 (0-1)                      |                                   |                                      | 0 (0-0)                                   |                               | 1 (1-2)                            |                                       | 0 (0-1)                                    | 1 (1-2)              |                              | 0 (0-1)                         |                                      |
| 2008 | Denmark                               | 1 (1-1)                      |                                   |                                      | 0 (0-0)                                   |                               | 1 (0-1)                            |                                       | 0 (0-0)                                    | 1 (0-1)              |                              | 0 (0-0)                         |                                      |
| 2009 | Denmark                               | 2 (2-2)                      |                                   |                                      | 1 (1-1)                                   |                               | 0 (0-1)                            |                                       | 0 (0-0)                                    | 0 (0-1)              |                              | 0 (0-0)                         |                                      |
| 2010 | Denmark                               | 1 (1-1)                      |                                   |                                      | 0 (0-0)                                   |                               | 0 (0-1)                            |                                       | 0 (0-0)                                    | 0 (0-1)              |                              | 0 (0-0)                         |                                      |
| 2011 | Denmark                               | 1 (0-1)                      |                                   |                                      | 0 (0-1)                                   |                               | 0 (0-1)                            |                                       | 0 (0-1)                                    | 0 (0-0)              |                              | 0 (0-0)                         |                                      |
| 2012 | Denmark                               | 0 (0-1)                      |                                   |                                      | 0 (0-0)                                   |                               | 0 (0-1)                            |                                       | 0 (0-0)                                    | 0 (0-0)              |                              | 0 (0-0)                         |                                      |
| 2013 | Denmark                               | 0 (0-0)                      |                                   |                                      | 0 (0-0)                                   |                               | 0 (0-0)                            |                                       | 0 (0-0)                                    | 0 (0-0)              |                              | 0 (0-0)                         |                                      |
| 2014 | Denmark                               | 0 (0-0)                      |                                   |                                      | 0 (0-0)                                   |                               | 0 (0-0)                            |                                       | 0 (0-0)                                    | 0 (0-0)              |                              | 0 (0-0)                         |                                      |
| 2015 | Denmark                               | 0 (0-0)                      | 0 (0-0)                           |                                      | 0 (0-0)                                   | 0 (0-0)                       | 0 (0-0)                            | 0 (0-0)                               | 0 (0-0)                                    | 0 (0-0)              | 0 (0-0)                      | 0 (0-0)                         | 0 (0-0)                              |
| 2000 | Djibouti                              | 100 (71-104)                 |                                   |                                      | 100 (71-105)                              |                               | 16 (7-32)                          |                                       | 16 (7-32)                                  | 5 (2-10)             |                              | 5 (2-10)                        |                                      |
| 2001 | Djibouti                              | 97 (69-101)                  |                                   |                                      | 98 (70-102)                               |                               | 16 (7-31)                          |                                       | 16 (7-32)                                  | 5 (2-10)             |                              | 5 (2-10)                        |                                      |
| 2002 | Djibouti                              | 95 (67-99)                   |                                   |                                      | 96 (68-100)                               |                               | 15 (7-31)                          |                                       | 16 (7-31)                                  | 5 (2-10)             |                              | 5 (2-10)                        |                                      |
| 2003 | Djibouti                              | 93 (66-97)                   |                                   |                                      | 94 (67-98)                                |                               | 15 (7-30)                          |                                       | 15 (7-30)                                  | 5 (2-9)              |                              | 5 (2-9)                         |                                      |
| 2004 | Djibouti                              | 90 (64-94)                   |                                   |                                      | 92 (65-96)                                |                               | 15 (7-29)                          |                                       | 15 (7-29)                                  | 5 (2-9)              |                              | 5 (2-9)                         |                                      |
| 2005 | Djibouti                              | 87 (62-91)                   |                                   |                                      | 89 (63-93)                                |                               | 14 (6-28)                          |                                       | 14 (7-28)                                  | 4 (2-9)              |                              | 5 (2-9)                         |                                      |
| 2006 | Djibouti                              | 85 (60-88)                   |                                   |                                      | 85 (61-89)                                |                               | 14 (6-27)                          |                                       | 14 (6-27)                                  | 4 (2-8)              |                              | 4 (2-9)                         |                                      |

Spn = *Streptococcus pneumoniae*; npnm = non-pneumonia, non-meningitis; HIV = deaths only in HIV-infected children; Uncertainty range provided in parentheses.

| Year | Country            | Spn pneumonia deaths (UR) | Spn pneumonia deaths, HIV (UR) | Spn pneumonia mortality rate (UR) | Spn pneumonia mortality rate, HIV (UR) | Spn meningitis deaths (UR) | Spn meningitis deaths, HIV (UR) | Spn meningitis mortality rate (UR) | Spn meningitis mortality rate, HIV (UR) | Spn NPNM deaths (UR) | Spn NPNM deaths, HIV (UR) | Spn NPNM mortality rate (UR) | Spn NPNM mortality rate, HIV (UR) |
|------|--------------------|---------------------------|--------------------------------|-----------------------------------|----------------------------------------|----------------------------|---------------------------------|------------------------------------|-----------------------------------------|----------------------|---------------------------|------------------------------|-----------------------------------|
| 2007 | Djibouti           | 81 (58-85)                |                                | 82 (58-86)                        |                                        | 13 (6-25)                  |                                 | 13 (6-26)                          |                                         | 4 (2-8)              |                           | 4 (2-8)                      |                                   |
| 2008 | Djibouti           | 78 (55-81)                |                                | 79 (56-82)                        |                                        | 13 (6-24)                  |                                 | 13 (7-24)                          |                                         | 4 (2-7)              |                           | 4 (2-8)                      |                                   |
| 2009 | Djibouti           | 74 (53-77)                |                                | 76 (54-79)                        |                                        | 12 (7-22)                  |                                 | 12 (7-23)                          |                                         | 4 (2-7)              |                           | 4 (2-7)                      |                                   |
| 2010 | Djibouti           | 71 (51-74)                |                                | 73 (52-76)                        |                                        | 12 (7-21)                  |                                 | 12 (7-21)                          |                                         | 4 (2-7)              |                           | 4 (2-7)                      |                                   |
| 2011 | Djibouti           | 70 (49-73)                |                                | 71 (51-74)                        |                                        | 12 (7-20)                  |                                 | 12 (7-21)                          |                                         | 11 (6-18)            |                           | 11 (6-18)                    |                                   |
| 2012 | Djibouti           | 70 (49-73)                |                                | 71 (50-74)                        |                                        | 12 (7-20)                  |                                 | 13 (7-20)                          |                                         | 11 (6-17)            |                           | 11 (6-18)                    |                                   |
| 2013 | Djibouti           | 47 (33-49)                |                                | 47 (34-49)                        |                                        | 8 (4-13)                   |                                 | 8 (4-13)                           |                                         | 7 (4-11)             |                           | 7 (4-11)                     |                                   |
| 2014 | Djibouti           | 40 (29-42)                |                                | 40 (29-42)                        |                                        | 7 (4-11)                   |                                 | 7 (4-11)                           |                                         | 6 (3-10)             |                           | 6 (3-10)                     |                                   |
| 2015 | Djibouti           | 35 (25-36)                | 5 (3-5)                        | 35 (25-36)                        | 5 (3-5)                                | 6 (3-10)                   | 1 (0-1)                         | 6 (3-10)                           | 1 (0-1)                                 | 6 (3-9)              | 1 (0-1)                   | 6 (3-9)                      | 1 (0-1)                           |
| 2000 | Dominica           | 0 (0-0)                   |                                | 3 (2-3)                           |                                        | 0 (0-0)                    |                                 | 0 (0-0)                            |                                         | 0 (0-0)              |                           | 0 (0-0)                      |                                   |
| 2001 | Dominica           | 0 (0-0)                   |                                | 3 (2-3)                           |                                        | 0 (0-0)                    |                                 | 3 (2-5)                            |                                         | 0 (0-0)              |                           | 3 (1-4)                      |                                   |
| 2002 | Dominica           | 0 (0-0)                   |                                | 1 (1-1)                           |                                        | 0 (0-0)                    |                                 | 3 (1-4)                            |                                         | 0 (0-0)              |                           | 2 (1-4)                      |                                   |
| 2003 | Dominica           | 0 (0-0)                   |                                | 0 (0-0)                           |                                        | 0 (0-0)                    |                                 | 3 (1-5)                            |                                         | 0 (0-0)              |                           | 3 (1-4)                      |                                   |
| 2004 | Dominica           | 0 (0-0)                   |                                | 3 (2-3)                           |                                        | 0 (0-0)                    |                                 | 0 (0-0)                            |                                         | 0 (0-0)              |                           | 0 (0-0)                      |                                   |
| 2005 | Dominica           | 0 (0-0)                   |                                | 5 (4-6)                           |                                        | 0 (0-0)                    |                                 | 0 (0-0)                            |                                         | 0 (0-0)              |                           | 0 (0-0)                      |                                   |
| 2006 | Dominica           | 0 (0-0)                   |                                | 6 (4-6)                           |                                        | 0 (0-0)                    |                                 | 0 (0-0)                            |                                         | 0 (0-0)              |                           | 0 (0-0)                      |                                   |
| 2007 | Dominica           | 1 (0-1)                   |                                | 10 (7-11)                         |                                        | 0 (0-0)                    |                                 | 0 (0-0)                            |                                         | 0 (0-0)              |                           | 0 (0-0)                      |                                   |
| 2008 | Dominica           | 0 (0-0)                   |                                | 8 (6-9)                           |                                        | 0 (0-0)                    |                                 | 2 (1-3)                            |                                         | 0 (0-0)              |                           | 2 (1-2)                      |                                   |
| 2009 | Dominica           | 0 (0-0)                   |                                | 6 (5-7)                           |                                        | 0 (0-0)                    |                                 | 2 (1-2)                            |                                         | 0 (0-0)              |                           | 1 (1-2)                      |                                   |
| 2010 | Dominica           | 0 (0-0)                   |                                | 1 (1-1)                           |                                        | 0 (0-0)                    |                                 | 2 (1-3)                            |                                         | 0 (0-0)              |                           | 2 (1-2)                      |                                   |
| 2011 | Dominica           | 0 (0-0)                   |                                | 3 (2-3)                           |                                        | 0 (0-0)                    |                                 | 0 (0-0)                            |                                         | 0 (0-0)              |                           | 0 (0-0)                      |                                   |
| 2012 | Dominica           | 0 (0-0)                   |                                | 6 (4-7)                           |                                        | 0 (0-0)                    |                                 | 0 (0-0)                            |                                         | 0 (0-0)              |                           | 0 (0-0)                      |                                   |
| 2013 | Dominica           | 0 (0-0)                   |                                | 8 (6-8)                           |                                        | 0 (0-0)                    |                                 | 0 (0-0)                            |                                         | 0 (0-0)              |                           | 0 (0-0)                      |                                   |
| 2014 | Dominica           | 0 (0-0)                   |                                | 7 (5-7)                           |                                        | 0 (0-0)                    |                                 | 0 (0-0)                            |                                         | 0 (0-0)              |                           | 0 (0-0)                      |                                   |
| 2015 | Dominica           | 0 (0-0)                   | 0 (0-0)                        | 8 (4-8)                           | 0 (0-0)                                | 0 (0-0)                    | 0 (0-0)                         | 0 (0-0)                            | 0 (0-0)                                 | 0 (0-0)              | 0 (0-0)                   | 0 (0-0)                      | 0 (0-0)                           |
| 2000 | Dominican Republic | 286 (203-398)             |                                | 29 (20-30)                        |                                        | 26 (8-65)                  |                                 | 2 (1-6)                            |                                         | 23 (8-57)            |                           | 2 (1-6)                      |                                   |
| 2001 | Dominican Republic | 265 (188-277)             |                                | 27 (19-28)                        |                                        | 24 (8-60)                  |                                 | 2 (1-6)                            |                                         | 21 (7-53)            |                           | 2 (1-5)                      |                                   |
| 2002 | Dominican Republic | 252 (178-262)             |                                | 25 (18-26)                        |                                        | 23 (7-57)                  |                                 | 2 (1-6)                            |                                         | 20 (6-51)            |                           | 2 (1-5)                      |                                   |
| 2003 | Dominican Republic | 243 (173-254)             |                                | 24 (17-25)                        |                                        | 22 (7-54)                  |                                 | 2 (1-5)                            |                                         | 19 (6-48)            |                           | 2 (1-5)                      |                                   |
| 2004 | Dominican Republic | 236 (167-246)             |                                | 23 (16-24)                        |                                        | 21 (7-52)                  |                                 | 2 (1-5)                            |                                         | 19 (6-46)            |                           | 2 (1-5)                      |                                   |
| 2005 | Dominican Republic | 225 (159-234)             |                                | 22 (15-23)                        |                                        | 20 (6-49)                  |                                 | 2 (1-5)                            |                                         | 17 (6-43)            |                           | 2 (1-4)                      |                                   |
| 2006 | Dominican Republic | 216 (153-225)             |                                | 21 (15-21)                        |                                        | 19 (6-46)                  |                                 | 2 (1-4)                            |                                         | 17 (5-41)            |                           | 2 (1-4)                      |                                   |
| 2007 | Dominican Republic | 205 (146-214)             |                                | 20 (14-20)                        |                                        | 17 (6-43)                  |                                 | 2 (1-4)                            |                                         | 16 (5-38)            |                           | 1 (0-4)                      |                                   |
| 2008 | Dominican Republic | 199 (141-208)             |                                | 19 (13-20)                        |                                        | 17 (5-41)                  |                                 | 2 (1-4)                            |                                         | 15 (5-36)            |                           | 1 (0-3)                      |                                   |
| 2009 | Dominican Republic | 192 (136-201)             |                                | 18 (13-19)                        |                                        | 16 (5-39)                  |                                 | 2 (0-4)                            |                                         | 14 (5-35)            |                           | 1 (0-3)                      |                                   |
| 2010 | Dominican Republic | 191 (136-199)             |                                | 18 (13-19)                        |                                        | 16 (5-39)                  |                                 | 1 (0-4)                            |                                         | 14 (5-34)            |                           | 1 (0-3)                      |                                   |
| 2011 | Dominican Republic | 190 (135-198)             |                                | 18 (13-19)                        |                                        | 15 (5-38)                  |                                 | 1 (0-4)                            |                                         | 14 (4-34)            |                           | 1 (0-3)                      |                                   |
| 2012 | Dominican Republic | 189 (134-197)             |                                | 18 (13-19)                        |                                        | 15 (5-38)                  |                                 | 1 (0-4)                            |                                         | 14 (4-34)            |                           | 1 (0-3)                      |                                   |
| 2013 | Dominican Republic | 191 (135-198)             |                                | 18 (13-19)                        |                                        | 15 (5-38)                  |                                 | 1 (0-4)                            |                                         | 14 (4-34)            |                           | 1 (0-3)                      |                                   |
| 2014 | Dominican Republic | 167 (119-174)             |                                | 16 (11-17)                        |                                        | 13 (5-32)                  |                                 | 1 (0-3)                            |                                         | 12 (4-29)            |                           | 1 (0-3)                      |                                   |
| 2015 | Dominican Republic | 176 (125-184)             | 1 (0-1)                        | 17 (12-18)                        | 0 (0-0)                                | 14 (5-34)                  | 0 (0-0)                         | 1 (0-3)                            | 0 (0-0)                                 | 13 (4-30)            | 0 (0-0)                   | 1 (0-3)                      | 0 (0-0)                           |
| 2000 | Ecuador            | 447 (317-465)             |                                | 30 (21-31)                        |                                        | 53 (20-94)                 |                                 | 4 (1-6)                            |                                         | 48 (18-83)           |                           | 3 (1-6)                      |                                   |
| 2001 | Ecuador            | 425 (301-443)             |                                | 28 (20-30)                        |                                        | 51 (19-89)                 |                                 | 3 (1-6)                            |                                         | 45 (17-79)           |                           | 3 (1-5)                      |                                   |
| 2002 | Ecuador            | 402 (285-419)             |                                | 27 (19-28)                        |                                        | 48 (18-94)                 |                                 | 3 (1-6)                            |                                         | 43 (16-75)           |                           | 3 (1-5)                      |                                   |
| 2003 | Ecuador            | 399 (283-416)             |                                | 27 (19-28)                        |                                        | 73 (27-125)                |                                 | 5 (2-8)                            |                                         | 65 (24-111)          |                           | 4 (2-7)                      |                                   |
| 2004 | Ecuador            | 417 (296-435)             |                                | 28 (20-29)                        |                                        | 91 (33-151)                |                                 | 6 (2-10)                           |                                         | 81 (29-134)          |                           | 5 (2-9)                      |                                   |
| 2005 | Ecuador            | 405 (287-422)             |                                | 27 (19-28)                        |                                        | 91 (52-163)                |                                 | 6 (3-11)                           |                                         | 81 (46-145)          |                           | 5 (3-10)                     |                                   |
| 2006 | Ecuador            | 396 (281-412)             |                                | 27 (19-28)                        |                                        | 91 (49-153)                |                                 | 6 (3-10)                           |                                         | 81 (43-137)          |                           | 5 (3-9)                      |                                   |
| 2007 | Ecuador            | 387 (275-404)             |                                | 26 (18-27)                        |                                        | 90 (46-144)                |                                 | 6 (3-10)                           |                                         | 80 (41-128)          |                           | 5 (3-9)                      |                                   |
| 2008 | Ecuador            | 391 (277-407)             |                                | 26 (18-27)                        |                                        | 92 (45-143)                |                                 | 6 (3-9)                            |                                         | 82 (40-127)          |                           | 5 (3-8)                      |                                   |
| 2009 | Ecuador            | 382 (271-398)             |                                | 25 (18-26)                        |                                        | 89 (44-138)                |                                 | 6 (3-9)                            |                                         | 80 (39-123)          |                           | 5 (3-8)                      |                                   |
| 2010 | Ecuador            | 361 (256-377)             |                                | 23 (17-24)                        |                                        | 84 (41-130)                |                                 | 5 (3-8)                            |                                         | 75 (37-116)          |                           | 5 (2-7)                      |                                   |
| 2011 | Ecuador            | 299 (212-312)             |                                | 19 (14-20)                        |                                        | 69 (34-107)                |                                 | 4 (2-7)                            |                                         | 62 (30-96)           |                           | 4 (2-6)                      |                                   |
| 2012 | Ecuador            | 222 (157-231)             |                                | 14 (10-15)                        |                                        | 52 (25-80)                 |                                 | 3 (2-5)                            |                                         | 46 (23-72)           |                           | 3 (1-5)                      |                                   |
| 2013 | Ecuador            | 193 (137-201)             |                                | 12 (9-13)                         |                                        | 46 (23-71)                 |                                 | 3 (1-5)                            |                                         | 41 (20-64)           |                           | 3 (1-4)                      |                                   |
| 2014 | Ecuador            | 137 (97-143)              |                                | 9 (6-9)                           |                                        | 33 (16-51)                 |                                 | 2 (1-3)                            |                                         | 29 (14-46)           |                           | 2 (1-3)                      |                                   |
| 2015 | Ecuador            | 113 (80-118)              | 0 (0-0)                        | 7 (5-7)                           | 0 (0-0)                                | 27 (13-42)                 | 0 (0-0)                         | 2 (1-3)                            | 0 (0-0)                                 | 24 (12-37)           | 0 (0-0)                   | 2 (1-2)                      | 0 (0-0)                           |
| 2000 | Egypt              | 4163 (2953-4338)          |                                | 53 (38-65)                        |                                        | 207 (86-418)               |                                 | 3 (1-5)                            |                                         | 185 (77-372)         |                           | 2 (1-5)                      |                                   |
| 2001 | Egypt              | 3844 (2726-4007)          |                                | 48 (34-50)                        |                                        | 192 (82-386)               |                                 | 2 (1-5)                            |                                         | 171 (73-344)         |                           | 2 (1-4)                      |                                   |
| 2002 | Egypt              | 3547 (2515-3696)          |                                | 44 (31-46)                        |                                        | 178 (77-355)               |                                 | 2 (1-4)                            |                                         | 158 (69-316)         |                           | 2 (1-4)                      |                                   |
| 2003 | Egypt              | 3269 (2318-3407)          |                                | 39 (28-41)                        |                                        | 164 (73-327)               |                                 | 2 (1-4)                            |                                         | 146 (65-291)         |                           | 2 (1-4)                      |                                   |
| 2004 | Egypt              | 3053 (2165-3182)          |                                | 36 (26-38)                        |                                        | 153 (64-309)               |                                 | 2 (1-4)                            |                                         | 138 (57-275)         |                           | 2 (1-3)                      |                                   |
| 2005 | Egypt              | 2828 (2005-2947)          |                                | 33 (23-34)                        |                                        | 142 (57-289)               |                                 | 2 (1-3)                            |                                         | 127 (51-258)         |                           | 1 (1-3)                      |                                   |
| 2006 | Egypt              | 2646 (1977-2758)          |                                | 30 (21-31)                        |                                        | 134 (56-270)               |                                 | 2 (1-3)                            |                                         | 120 (50-240)         |                           | 1 (1-3)                      |                                   |
| 2007 | Egypt              | 2488 (1764-2593)          |                                | 28 (20-29)                        |                                        | 128 (56-253)               |                                 | 1 (1-3)                            |                                         | 114 (50-226)         |                           | 1 (1-3)                      |                                   |
| 2008 | Egypt              | 2329 (1651-2427)          |                                | 26 (18-27)                        |                                        | 121 (56-236)               |                                 | 1 (1-3)                            |                                         | 108 (49-210)         |                           | 1 (1-2)                      |                                   |
| 2009 | Egypt              | 2221 (1575-2315)          |                                | 24 (17-25)                        |                                        | 116 (52-226)               |                                 | 1 (1-2)                            |                                         | 103 (47-202)         |                           | 1 (1-2)                      |                                   |
| 2010 | Egypt              | 2161 (1533-2253)          |                                | 23 (16-24)                        |                                        | 113 (39-264)               |                                 | 1 (0-3)                            |                                         | 100 (34-235)         |                           | 1 (0-2)                      |                                   |
| 2011 | Egypt              | 2145 (1521-2235)          |                                | 22 (16-23)                        |                                        | 111 (37-261)               |                                 | 1 (0-3)                            |                                         | 99 (33-232)          |                           | 1 (0-2)                      |                                   |
| 2012 | Egypt              | 2174 (1542-2266)          |                                | 21 (15-22)                        |                                        | 111 (37-262)               |                                 | 1 (0-3)                            |                                         | 99 (33-233)          |                           | 1 (0-2)                      |                                   |
| 2013 | Egypt              | 2216 (1571-2310)          |                                | 20 (14-21)                        |                                        | 111 (36-264)               |                                 | 1 (0-2)                            |                                         | 99 (32-235)          |                           | 1 (0-2)                      |                                   |
| 2014 | Egypt              | 2696 (1912-2810)          |                                | 23 (17-24)                        |                                        | 167 (53-397)               |                                 | 1 (0-3)                            |                                         | 148 (48-354)         |                           | 1 (0-2)                      |                                   |
| 2015 | Egypt              | 2715 (1925-2829)          | 2 (1-2)                        | 23 (16-24)                        | 0 (0-0)                                | 170 (54-407)               | 0 (0-0)                         | 1 (0-3)                            | 0 (0-0)                                 | 151 (48-362)         | 0 (0-0)                   | 1 (0-3)                      | 0 (0-0)                           |
| 2000 | El Salvador        | 253 (179-264)             |                                | 36 (25-37)                        |                                        | 18 (5-47)                  |                                 | 3 (1-7)                            |                                         | 16 (5-42)            |                           | 2 (1-6)                      |                                   |
| 2001 | El Salvador        | 221 (156-230)             |                                | 32 (23-34)                        |                                        | 16 (5-41)                  |                                 | 2 (1-6)                            |                                         | 14 (4-36)            |                           | 2 (1-5)                      |                                   |
| 2002 | El Salvador        | 219 (155-228)             |                                | 33 (23-34)                        |                                        | 28 (6-87)                  |                                 | 4 (1-13)                           |                                         | 25 (5-77)            |                           | 4 (1-12)                     |                                   |
| 2003 | El Salvador        | 198 (141-207)             |                                | 31 (22-32)                        |                                        | 27 (6-83)                  |                                 | 4 (1-13)                           |                                         | 24 (5-74)            |                           | 4 (1-11)                     |                                   |
| 2004 | El Salvador        | 178 (126-186)             |                                | 28 (20-29)                        |                                        | 24 (6-74)                  |                                 | 4 (1-12)                           |                                         | 22 (5-66)            |                           | 3 (1-10)                     |                                   |
| 2005 | El Salvador        | 163 (115-170)             |                                | 27 (19-28)                        |                                        | 22 (5-67)                  |                                 | 4 (1-11)                           |                                         | 20 (5-60)            |                           | 3 (1-10)                     |                                   |
| 2006 | El Salvador        | 148 (105-154)             |                                | 25 (18-26)                        |                                        | 20 (5-61)                  |                                 | 3 (1-10)                           |                                         | 18 (4-55)            |                           | 3 (1-9)                      |                                   |
| 2007 | El Salvador        | 138 (98-144)              |                                | 24 (17-25)                        |                                        | 19 (5-59)                  |                                 | 3 (1-10)                           |                                         | 17 (4-52)            |                           | 3 (1-9)                      |                                   |
| 2008 | El Salvador        | 126 (89-131)              |                                | 22 (16-23)                        |                                        | 18 (4-53)                  |                                 | 3 (1-9)                            |                                         | 16 (4-47)            |                           | 3 (1-8)                      |                                   |
| 2009 | El Salvador        | 116 (82-121)              |                                | 21 (15-22)                        |                                        | 16 (4-48)                  |                                 | 3 (1-9)                            |                                         | 14 (3-43)            |                           | 3 (1-8)                      |                                   |
| 2010 | El Salvador        | 95 (67-99)                |                                | 17 (12-18)                        |                                        | 13 (3-38)                  |                                 | 2 (1-7)                            |                                         | 11 (3-34)            |                           | 2 (1-6)                      |                                   |
| 2011 | El Salvador        | 71 (50-74)                |                                | 13 (9-14)                         |                                        | 9 (2-27)                   |                                 | 2 (0-5)                            |                                         | 8 (2-24)             |                           | 2 (0-4)                      |                                   |
| 2012 | El Salvador        | 53 (38-55)                |                                | 10 (7-10)                         |                                        | 7 (2-19)                   |                                 | 1 (0-4)                            |                                         | 6 (2-17)             |                           | 1 (0-3)                      |                                   |
| 2013 | El Salvador        | 45 (32-47)                |                                | 9 (6-9)                           |                                        | 6 (2-17)                   |                                 | 1 (0-3)                            |                                         | 5 (2-15)             |                           | 1 (0-3)                      |                                   |
| 2014 | El Salvador        | 31 (22-32)                |                                | 6 (4-6)                           |                                        | 4 (1-11)                   |                                 | 1 (0-2)                            |                                         | 3 (1-10)             |                           | 1 (0-2)                      |                                   |

Spn = *Streptococcus pneumoniae*; npnm = non-pneumonia, non-meningitis; HIV = deaths only in HIV-infected children; Uncertainty range provided in parentheses.

| Year | Country           | Spn pneumonia deaths (UR) | Spn pneumonia deaths, HIV (UR) | Spn pneumonia mortality rate (UR) | Spn pneumonia mortality rate, HIV (UR) | Spn meningitis deaths (UR) | Spn meningitis deaths, HIV (UR) | Spn meningitis mortality rate (UR) | Spn meningitis mortality rate, HIV (UR) | Spn NPNM deaths (UR) | Spn NPNM deaths, HIV (UR) | Spn NPNM mortality rate (UR) | Spn NPNM mortality rate, HIV (UR) |
|------|-------------------|---------------------------|--------------------------------|-----------------------------------|----------------------------------------|----------------------------|---------------------------------|------------------------------------|-----------------------------------------|----------------------|---------------------------|------------------------------|-----------------------------------|
| 2015 | El Salvador       | 25 (18-26)                | 0 (0-0)                        | 5 (3-5)                           | 0 (0-0)                                | 3 (1-8)                    | 0 (0-0)                         | 1 (0-2)                            | 0 (0-0)                                 | 3 (1-7)              | 0 (0-0)                   | 1 (0-1)                      | 0 (0-0)                           |
| 2000 | Equatorial Guinea | 143 (101-149)             |                                | 164 (117-171)                     |                                        | 14 (8-25)                  |                                 | 16 (9-29)                          |                                         | 4 (2-8)              |                           | 5 (3-9)                      |                                   |
| 2001 | Equatorial Guinea | 137 (97-143)              |                                | 154 (109-160)                     |                                        | 12 (5-26)                  |                                 | 14 (6-29)                          |                                         | 4 (2-8)              |                           | 4 (2-9)                      |                                   |
| 2002 | Equatorial Guinea | 128 (91-133)              |                                | 141 (100-147)                     |                                        | 11 (4-23)                  |                                 | 12 (5-26)                          |                                         | 3 (1-7)              |                           | 4 (2-8)                      |                                   |
| 2003 | Equatorial Guinea | 117 (83-122)              |                                | 126 (90-132)                      |                                        | 10 (4-20)                  |                                 | 10 (4-22)                          |                                         | 3 (1-6)              |                           | 3 (1-7)                      |                                   |
| 2004 | Equatorial Guinea | 109 (77-114)              |                                | 115 (82-120)                      |                                        | 9 (4-18)                   |                                 | 9 (4-19)                           |                                         | 3 (1-6)              |                           | 3 (1-6)                      |                                   |
| 2005 | Equatorial Guinea | 107 (76-111)              |                                | 111 (78-115)                      |                                        | 8 (3-17)                   |                                 | 9 (4-18)                           |                                         | 3 (1-5)              |                           | 3 (1-6)                      |                                   |
| 2006 | Equatorial Guinea | 113 (80-118)              |                                | 114 (81-118)                      |                                        | 8 (3-16)                   |                                 | 8 (4-18)                           |                                         | 3 (1-6)              |                           | 3 (1-6)                      |                                   |
| 2007 | Equatorial Guinea | 122 (87-127)              |                                | 119 (85-124)                      |                                        | 9 (4-19)                   |                                 | 9 (4-18)                           |                                         | 3 (1-6)              |                           | 3 (1-6)                      |                                   |
| 2008 | Equatorial Guinea | 130 (92-135)              |                                | 123 (87-128)                      |                                        | 9 (4-20)                   |                                 | 9 (4-19)                           |                                         | 3 (1-6)              |                           | 3 (1-6)                      |                                   |
| 2009 | Equatorial Guinea | 133 (94-139)              |                                | 123 (87-128)                      |                                        | 10 (4-20)                  |                                 | 9 (4-18)                           |                                         | 3 (1-6)              |                           | 3 (1-6)                      |                                   |
| 2010 | Equatorial Guinea | 134 (95-139)              |                                | 120 (85-125)                      |                                        | 10 (4-20)                  |                                 | 9 (4-18)                           |                                         | 3 (1-6)              |                           | 3 (1-6)                      |                                   |
| 2011 | Equatorial Guinea | 130 (92-136)              |                                | 113 (80-118)                      |                                        | 10 (4-20)                  |                                 | 9 (4-18)                           |                                         | 3 (1-6)              |                           | 3 (1-6)                      |                                   |
| 2012 | Equatorial Guinea | 125 (88-130)              |                                | 106 (75-110)                      |                                        | 10 (4-20)                  |                                 | 8 (3-17)                           |                                         | 3 (1-6)              |                           | 3 (1-5)                      |                                   |
| 2013 | Equatorial Guinea | 126 (90-132)              |                                | 105 (74-109)                      |                                        | 10 (4-20)                  |                                 | 8 (4-17)                           |                                         | 3 (1-6)              |                           | 3 (1-5)                      |                                   |
| 2014 | Equatorial Guinea | 128 (90-133)              |                                | 103 (73-108)                      |                                        | 10 (4-20)                  |                                 | 8 (4-17)                           |                                         | 3 (1-6)              |                           | 3 (1-5)                      |                                   |
| 2015 | Equatorial Guinea | 125 (88-130)              | 51 (36-53)                     | 99 (70-103)                       | 40 (28-42)                             | 10 (4-20)                  | 4 (2-8)                         | 8 (3-16)                           | 3 (1-6)                                 | 3 (1-6)              | 1 (1-3)                   | 2 (1-5)                      | 1 (0-2)                           |
| 2000 | Eritrea           | 682 (484-711)             |                                | 124 (88-129)                      |                                        | 121 (47-260)               |                                 | 22 (9-47)                          |                                         | 38 (15-82)           |                           | 7 (3-15)                     |                                   |
| 2001 | Eritrea           | 675 (479-704)             |                                | 119 (85-124)                      |                                        | 121 (47-260)               |                                 | 21 (8-46)                          |                                         | 38 (15-82)           |                           | 7 (3-14)                     |                                   |
| 2002 | Eritrea           | 673 (477-702)             |                                | 114 (81-119)                      |                                        | 122 (48-262)               |                                 | 21 (8-44)                          |                                         | 38 (15-82)           |                           | 7 (3-14)                     |                                   |
| 2003 | Eritrea           | 673 (477-701)             |                                | 110 (78-114)                      |                                        | 123 (49-265)               |                                 | 20 (8-43)                          |                                         | 39 (15-83)           |                           | 6 (2-14)                     |                                   |
| 2004 | Eritrea           | 672 (476-700)             |                                | 105 (74-109)                      |                                        | 124 (41-277)               |                                 | 19 (6-43)                          |                                         | 111 (37-246)         |                           | 17 (6-38)                    |                                   |
| 2005 | Eritrea           | 666 (472-694)             |                                | 100 (71-105)                      |                                        | 125 (41-278)               |                                 | 19 (6-42)                          |                                         | 111 (37-247)         |                           | 17 (6-37)                    |                                   |
| 2006 | Eritrea           | 662 (470-690)             |                                | 95 (67-99)                        |                                        | 125 (42-280)               |                                 | 18 (6-40)                          |                                         | 112 (37-249)         |                           | 16 (6-36)                    |                                   |
| 2007 | Eritrea           | 651 (462-679)             |                                | 90 (64-94)                        |                                        | 125 (42-279)               |                                 | 17 (6-39)                          |                                         | 111 (37-248)         |                           | 15 (6-34)                    |                                   |
| 2008 | Eritrea           | 634 (450-661)             |                                | 86 (61-89)                        |                                        | 123 (41-275)               |                                 | 17 (6-37)                          |                                         | 110 (37-245)         |                           | 15 (6-33)                    |                                   |
| 2009 | Eritrea           | 614 (436-640)             |                                | 81 (58-85)                        |                                        | 121 (40-269)               |                                 | 16 (5-36)                          |                                         | 107 (36-239)         |                           | 14 (6-32)                    |                                   |
| 2010 | Eritrea           | 596 (423-621)             |                                | 78 (56-81)                        |                                        | 117 (39-261)               |                                 | 15 (5-34)                          |                                         | 104 (35-233)         |                           | 14 (6-30)                    |                                   |
| 2011 | Eritrea           | 577 (409-602)             |                                | 74 (53-77)                        |                                        | 113 (38-252)               |                                 | 15 (5-32)                          |                                         | 101 (34-225)         |                           | 13 (4-29)                    |                                   |
| 2012 | Eritrea           | 556 (394-580)             |                                | 71 (50-74)                        |                                        | 109 (36-242)               |                                 | 14 (5-31)                          |                                         | 97 (32-215)          |                           | 12 (4-27)                    |                                   |
| 2013 | Eritrea           | 535 (379-557)             |                                | 68 (48-70)                        |                                        | 104 (35-231)               |                                 | 13 (4-29)                          |                                         | 92 (31-206)          |                           | 12 (4-26)                    |                                   |
| 2014 | Eritrea           | 519 (368-541)             |                                | 65 (46-68)                        |                                        | 100 (34-224)               |                                 | 13 (4-28)                          |                                         | 89 (30-199)          |                           | 11 (4-25)                    |                                   |
| 2015 | Eritrea           | 500 (355-521)             | 17 (12-17)                     | 62 (44-65)                        | 2 (1-2)                                | 97 (32-215)                | 3 (1-7)                         | 12 (4-27)                          | 0 (0-1)                                 | 86 (29-192)          | 3 (1-6)                   | 11 (4-24)                    | 0 (0-1)                           |
| 2000 | Estonia           | 2 (1-2)                   |                                | 3 (2-3)                           |                                        | 1 (0-1)                    |                                 | 1 (0-1)                            |                                         | 0 (0-1)              |                           | 0 (0-1)                      |                                   |
| 2001 | Estonia           | 1 (0-1)                   |                                | 1 (1-1)                           |                                        | 1 (0-1)                    |                                 | 1 (0-2)                            |                                         | 1 (0-1)              |                           | 1 (0-2)                      |                                   |
| 2002 | Estonia           | 2 (1-2)                   |                                | 3 (2-3)                           |                                        | 1 (0-1)                    |                                 | 1 (0-2)                            |                                         | 1 (0-1)              |                           | 1 (0-2)                      |                                   |
| 2003 | Estonia           | 1 (1-1)                   |                                | 2 (1-2)                           |                                        | 0 (0-1)                    |                                 | 1 (0-1)                            |                                         | 0 (0-1)              |                           | 0 (0-1)                      |                                   |
| 2004 | Estonia           | 2 (1-2)                   |                                | 3 (2-3)                           |                                        | 0 (0-1)                    |                                 | 1 (0-1)                            |                                         | 0 (0-1)              |                           | 0 (0-1)                      |                                   |
| 2005 | Estonia           | 2 (1-2)                   |                                | 2 (2-3)                           |                                        | 1 (0-1)                    |                                 | 1 (0-2)                            |                                         | 1 (0-1)              |                           | 1 (0-2)                      |                                   |
| 2006 | Estonia           | 0 (0-0)                   |                                | 0 (0-0)                           |                                        | 0 (0-1)                    |                                 | 1 (0-1)                            |                                         | 0 (0-1)              |                           | 0 (0-1)                      |                                   |
| 2007 | Estonia           | 1 (1-1)                   |                                | 1 (1-1)                           |                                        | 0 (0-1)                    |                                 | 1 (0-1)                            |                                         | 0 (0-1)              |                           | 1 (0-1)                      |                                   |
| 2008 | Estonia           | 0 (0-1)                   |                                | 1 (0-1)                           |                                        | 1 (1-2)                    |                                 | 2 (1-3)                            |                                         | 1 (0-2)              |                           | 1 (1-3)                      |                                   |
| 2009 | Estonia           | 1 (1-1)                   |                                | 1 (1-1)                           |                                        | 1 (0-1)                    |                                 | 1 (0-1)                            |                                         | 0 (0-1)              |                           | 1 (0-1)                      |                                   |
| 2010 | Estonia           | 2 (1-2)                   |                                | 2 (2-2)                           |                                        | 1 (0-1)                    |                                 | 1 (0-2)                            |                                         | 1 (0-1)              |                           | 1 (0-2)                      |                                   |
| 2011 | Estonia           | 1 (1-1)                   |                                | 1 (1-1)                           |                                        | 1 (0-1)                    |                                 | 1 (0-1)                            |                                         | 1 (0-1)              |                           | 1 (0-1)                      |                                   |
| 2012 | Estonia           | 1 (1-1)                   |                                | 1 (1-1)                           |                                        | 0 (0-0)                    |                                 | 0 (0-0)                            |                                         | 0 (0-0)              |                           | 0 (0-0)                      |                                   |
| 2013 | Estonia           | 1 (1-1)                   |                                | 1 (1-1)                           |                                        | 0 (0-1)                    |                                 | 1 (0-1)                            |                                         | 0 (0-1)              |                           | 0 (0-1)                      |                                   |
| 2014 | Estonia           | 1 (1-1)                   |                                | 1 (1-1)                           |                                        | 0 (0-1)                    |                                 | 0 (0-1)                            |                                         | 0 (0-1)              |                           | 0 (0-1)                      |                                   |
| 2015 | Estonia           | 1 (1-1)                   | 0 (0-0)                        | 1 (1-1)                           | 0 (0-0)                                | 0 (0-1)                    | 0 (0-0)                         | 0 (0-1)                            | 0 (0-0)                                 | 0 (0-0)              | 0 (0-0)                   | 0 (0-1)                      | 0 (0-0)                           |
| 2000 | Ethiopia          | 24802 (17587-25847)       |                                | 203 (144-212)                     |                                        | 5307 (1707-12412)          |                                 | 44 (14-102)                        |                                         | 1669 (537-3902)      |                           | 14 (4-32)                    |                                   |
| 2001 | Ethiopia          | 24253 (17198-25276)       |                                | 193 (137-201)                     |                                        | 5169 (1670-12074)          |                                 | 41 (13-96)                         |                                         | 1625 (525-3796)      |                           | 13 (4-30)                    |                                   |
| 2002 | Ethiopia          | 23217 (16463-24196)       |                                | 181 (128-189)                     |                                        | 4923 (1597-11484)          |                                 | 38 (12-90)                         |                                         | 1548 (502-3611)      |                           | 12 (4-28)                    |                                   |
| 2003 | Ethiopia          | 21886 (15519-22808)       |                                | 168 (119-176)                     |                                        | 4607 (1500-10731)          |                                 | 35 (12-83)                         |                                         | 1448 (472-3374)      |                           | 11 (4-26)                    |                                   |
| 2004 | Ethiopia          | 20400 (14465-21260)       |                                | 156 (110-162)                     |                                        | 4240 (1386-9860)           |                                 | 32 (11-75)                         |                                         | 1333 (436-3100)      |                           | 10 (3-24)                    |                                   |
| 2005 | Ethiopia          | 18908 (13407-19705)       |                                | 143 (101-149)                     |                                        | 3866 (1268-8975)           |                                 | 29 (10-68)                         |                                         | 1216 (399-2822)      |                           | 9 (3-21)                     |                                   |
| 2006 | Ethiopia          | 18146 (12868-18911)       |                                | 136 (97-142)                      |                                        | 3644 (1208-8431)           |                                 | 27 (9-63)                          |                                         | 1146 (379-2651)      |                           | 9 (3-20)                     |                                   |
| 2007 | Ethiopia          | 16567 (11748-17266)       |                                | 124 (88-129)                      |                                        | 3264 (1091-7528)           |                                 | 24 (8-56)                          |                                         | 1026 (343-2367)      |                           | 8 (3-18)                     |                                   |
| 2008 | Ethiopia          | 14618 (10366-15235)       |                                | 108 (77-113)                      |                                        | 2828 (954-6502)            |                                 | 21 (7-48)                          |                                         | 889 (300-2044)       |                           | 7 (2-15)                     |                                   |
| 2009 | Ethiopia          | 14003 (9929-14593)        |                                | 103 (73-107)                      |                                        | 2662 (906-6101)            |                                 | 20 (7-45)                          |                                         | 837 (285-1918)       |                           | 6 (2-14)                     |                                   |
| 2010 | Ethiopia          | 13052 (9255-13602)        |                                | 95 (68-99)                        |                                        | 2466 (838-5569)            |                                 | 18 (6-41)                          |                                         | 766 (263-1751)       |                           | 6 (2-13)                     |                                   |
| 2011 | Ethiopia          | 11671 (8276-12163)        |                                | 85 (60-88)                        |                                        | 2127 (604-4996)            |                                 | 15 (4-36)                          |                                         | 1893 (538-4448)      |                           | 14 (4-32)                    |                                   |
| 2012 | Ethiopia          | 9846 (6982-10261)         |                                | 71 (50-74)                        |                                        | 1739 (500-4074)            |                                 | 13 (4-29)                          |                                         | 1548 (445-3627)      |                           | 11 (3-26)                    |                                   |
| 2013 | Ethiopia          | 8042 (5702-8381)          |                                | 57 (41-60)                        |                                        | 1384 (403-3234)            |                                 | 10 (3-23)                          |                                         | 1232 (359-2879)      |                           | 9 (3-20)                     |                                   |
| 2014 | Ethiopia          | 6856 (4862-7145)          |                                | 48 (34-50)                        |                                        | 1170 (345-2727)            |                                 | 8 (2-19)                           |                                         | 1042 (307-2428)      |                           | 7 (2-17)                     |                                   |
| 2015 | Ethiopia          | 4622 (3277-4817)          | 180 (128-188)                  | 32 (23-34)                        | 1 (1-1)                                | 756 (226-1757)             | 29 (9-68)                       | 5 (2-12)                           | 0 (0-0)                                 | 673 (201-1565)       | 26 (8-61)                 | 5 (1-11)                     | 0 (0-0)                           |
| 2000 | Fiji              | 18 (13-19)                |                                | 19 (13-20)                        |                                        | 5 (2-8)                    |                                 | 5 (2-9)                            |                                         | 4 (2-7)              |                           | 4 (2-8)                      |                                   |
| 2001 | Fiji              | 17 (12-18)                |                                | 19 (13-19)                        |                                        | 5 (2-8)                    |                                 | 5 (2-9)                            |                                         | 4 (2-7)              |                           | 4 (2-8)                      |                                   |
| 2002 | Fiji              | 17 (12-18)                |                                | 19 (13-20)                        |                                        | 5 (2-8)                    |                                 | 5 (2-9)                            |                                         | 4 (2-7)              |                           | 5 (2-8)                      |                                   |
| 2003 | Fiji              | 17 (12-18)                |                                | 19 (13-20)                        |                                        | 5 (2-8)                    |                                 | 5 (2-9)                            |                                         | 4 (2-7)              |                           | 5 (2-8)                      |                                   |
| 2004 | Fiji              | 17 (12-18)                |                                | 19 (14-20)                        |                                        | 5 (2-8)                    |                                 | 5 (2-9)                            |                                         | 4 (2-7)              |                           | 5 (2-8)                      |                                   |
| 2005 | Fiji              | 18 (13-18)                |                                | 20 (14-21)                        |                                        | 5 (2-8)                    |                                 | 5 (2-10)                           |                                         | 4 (2-8)              |                           | 5 (2-9)                      |                                   |
| 2006 | Fiji              | 19 (13-20)                |                                | 21 (15-22)                        |                                        | 5 (2-9)                    |                                 | 5 (3-10)                           |                                         | 5 (2-8)              |                           | 5 (2-9)                      |                                   |
| 2007 | Fiji              | 20 (14-21)                |                                | 23 (16-24)                        |                                        | 5 (2-10)                   |                                 | 6 (3-11)                           |                                         | 5 (2-9)              |                           | 5 (2-10)                     |                                   |
| 2008 | Fiji              | 21 (15-21)                |                                | 23 (17-24)                        |                                        | 6 (2-10)                   |                                 | 6 (3-11)                           |                                         | 5 (2-9)              |                           | 6 (3-10)                     |                                   |
| 2009 | Fiji              | 21 (15-22)                |                                | 24 (17-25)                        |                                        | 6 (2-10)                   |                                 | 6 (3-11)                           |                                         | 5 (2-9)              |                           | 6 (3-10)                     |                                   |
| 2010 | Fiji              | 20 (14-21)                |                                | 23 (16-24)                        |                                        | 5 (2-10)                   |                                 | 6 (3-11)                           |                                         | 5 (2-9)              |                           | 6 (2-10)                     |                                   |
| 2011 | Fiji              | 20 (14-21)                |                                | 22 (16-23)                        |                                        | 5 (2-9)                    |                                 | 6 (3-11)                           |                                         | 5 (2-8)              |                           | 5 (2-9)                      |                                   |
| 2012 | Fiji              | 19 (14-20)                |                                | 22 (15-22)                        |                                        | 5 (2-9)                    |                                 | 6 (3-10)                           |                                         | 4 (2-8)              |                           | 5 (2-9)                      |                                   |
| 2013 | Fiji              | 10 (7-11)                 |                                | 12 (8-12)                         |                                        | 3 (1-6)                    |                                 | 4 (2-7)                            |                                         | 3 (1-5)              |                           | 3 (1-6)                      |                                   |
| 2014 | Fiji              | 9 (6-9)                   |                                | 10 (7-10)                         |                                        | 2 (1-4)                    |                                 | 3 (1-5)                            |                                         | 2 (1-4)              |                           | 2 (1-4)                      |                                   |
| 2015 | Fiji              | 8 (6-8)                   | 0 (0-0)                        | 9 (7-10)                          | 0 (0-0)                                | 2 (1-4)                    | 0 (0-0)                         | 2 (1-4)                            | 0 (0-0)                                 | 2 (1-3)              | 0 (0-0)                   | 2 (1-4)                      | 0 (0-0)                           |
| 2000 | Finland           | 2 (1-2)                   |                                | 1 (0-1)                           |                                        | 0 (0-1)                    |                                 | 0 (0-0)                            |                                         | 0 (0-1)              |                           | 0 (0-0)                      |                                   |
| 2001 | Finland           | 3 (2-3)                   |                                | 1 (1-1)                           |                                        | 0 (0-1)                    |                                 | 0 (0-0)                            |                                         | 0 (0-1)              |                           | 0 (0-0)                      |                                   |
| 2002 | Finland           | 0 (0-0)                   |                                | 0 (0-0)                           |                                        | 0 (0-0)                    |                                 | 0 (0-0)                            |                                         | 0 (0-0)              |                           | 0 (0-0)                      |                                   |
| 2003 | Finland           | 5 (3-5)                   |                                | 2 (1-2)                           |                                        | 2 (1-3)                    |                                 | 1 (0-1)                            |                                         | 2 (1-3)              |                           | 1 (0-1)                      |                                   |
| 2004 | Finland           | 1 (1-1)                   |                                | 1 (0-1)                           |                                        | 2 (1-3)                    |                                 | 1 (0-1)                            |                                         | 2 (1-3)              |                           | 1 (0-1)                      |                                   |
| 2005 | Finland           | 2 (1-2)                   |                                | 1 (0-1)                           |                                        | 1 (0-2)                    |                                 | 0 (0-1)                            |                                         | 1 (0-2)              |                           | 0 (0-1)                      |                                   |
| 2006 | Finland           | 0 (0-0)                   |                                | 0 (0-0)                           |                                        | 1 (0-1)                    |                                 | 0 (0-0)                            |                                         | 0 (0-1)              |                           | 0 (0-0)                      |                                   |

| Year | Country | Spn pneumonia deaths<br>(UR) | Spn pneumonia deaths,<br>HIV (UR) | Spn pneumonia<br>mortality rate (UR) | Spn pneumonia<br>mortality rate, HIV (UR) | Spn meningitis deaths<br>(UR) | Spn meningitis deaths,<br>HIV (UR) | Spn meningitis<br>mortality rate (UR) | Spn meningitis<br>mortality rate, HIV (UR) | Spn NPNM deaths (UR) | Spn NPNM deaths, HIV<br>(UR) | Spn NPNM mortality<br>rate (UR) | Spn NPNM mortality<br>rate, HIV (UR) |
|------|---------|------------------------------|-----------------------------------|--------------------------------------|-------------------------------------------|-------------------------------|------------------------------------|---------------------------------------|--------------------------------------------|----------------------|------------------------------|---------------------------------|--------------------------------------|
| 2007 | Finland | 2 (1-2)                      |                                   | 1 (0-1)                              |                                           | 1 (0-2)                       |                                    | 0 (0-1)                               |                                            | 1 (0-1)              |                              | 0 (0-0)                         |                                      |
| 2008 | Finland | 2 (1-2)                      |                                   | 1 (0-1)                              |                                           | 1 (0-2)                       |                                    | 0 (0-1)                               |                                            | 1 (0-2)              |                              | 0 (0-1)                         |                                      |
| 2009 | Finland | 2 (1-2)                      |                                   | 1 (0-1)                              |                                           | 0 (0-0)                       |                                    | 0 (0-0)                               |                                            | 0 (0-0)              |                              | 0 (0-0)                         |                                      |
| 2010 | Finland | 1 (1-1)                      |                                   | 0 (0-0)                              |                                           | 1 (0-2)                       |                                    | 0 (0-1)                               |                                            | 1 (0-1)              |                              | 0 (0-0)                         |                                      |
| 2011 | Finland | 3 (2-3)                      |                                   | 1 (1-1)                              |                                           | 0 (0-1)                       |                                    | 0 (0-0)                               |                                            | 0 (0-1)              |                              | 0 (0-0)                         |                                      |
| 2012 | Finland | 1 (0-1)                      |                                   | 0 (0-0)                              |                                           | 0 (0-0)                       |                                    | 0 (0-0)                               |                                            | 0 (0-0)              |                              | 0 (0-0)                         |                                      |
| 2013 | Finland | 1 (1-1)                      |                                   | 0 (0-0)                              |                                           | 0 (0-1)                       |                                    | 0 (0-0)                               |                                            | 0 (0-1)              |                              | 0 (0-0)                         |                                      |
| 2014 | Finland | 1 (1-1)                      |                                   | 0 (0-0)                              |                                           | 0 (0-0)                       |                                    | 0 (0-0)                               |                                            | 0 (0-0)              |                              | 0 (0-0)                         |                                      |
| 2015 | Finland | 1 (0-1)                      |                                   | 0 (0-0)                              |                                           | 0 (0-0)                       |                                    | 0 (0-0)                               |                                            | 0 (0-0)              |                              | 0 (0-0)                         |                                      |
| 2000 | France  | 23 (16-24)                   |                                   | 1 (0-1)                              |                                           | 29 (13-52)                    |                                    | 1 (0-1)                               |                                            | 26 (12-47)           |                              | 1 (0-1)                         |                                      |
| 2001 | France  | 20 (14-21)                   |                                   | 1 (0-1)                              |                                           | 26 (12-48)                    |                                    | 1 (0-1)                               |                                            | 24 (11-43)           |                              | 1 (0-1)                         |                                      |
| 2002 | France  | 20 (14-21)                   |                                   | 1 (0-1)                              |                                           | 26 (12-47)                    |                                    | 1 (0-1)                               |                                            | 23 (10-42)           |                              | 1 (0-1)                         |                                      |
| 2003 | France  | 24 (17-25)                   |                                   | 1 (0-1)                              |                                           | 23 (10-42)                    |                                    | 1 (0-1)                               |                                            | 21 (9-37)            |                              | 1 (0-1)                         |                                      |
| 2004 | France  | 14 (10-14)                   |                                   | 0 (0-0)                              |                                           | 22 (10-39)                    |                                    | 1 (0-1)                               |                                            | 19 (9-35)            |                              | 1 (0-1)                         |                                      |
| 2005 | France  | 25 (18-26)                   |                                   | 1 (0-1)                              |                                           | 15 (7-28)                     |                                    | 0 (0-1)                               |                                            | 14 (6-25)            |                              | 0 (0-1)                         |                                      |
| 2006 | France  | 13 (9-13)                    |                                   | 0 (0-0)                              |                                           | 20 (9-36)                     |                                    | 1 (0-1)                               |                                            | 18 (8-32)            |                              | 0 (0-1)                         |                                      |
| 2007 | France  | 20 (14-21)                   |                                   | 1 (0-1)                              |                                           | 13 (6-23)                     |                                    | 0 (0-1)                               |                                            | 11 (5-20)            |                              | 0 (0-1)                         |                                      |
| 2008 | France  | 12 (8-12)                    |                                   | 0 (0-0)                              |                                           | 16 (7-28)                     |                                    | 0 (0-1)                               |                                            | 14 (6-25)            |                              | 0 (0-1)                         |                                      |
| 2009 | France  | 14 (10-15)                   |                                   | 0 (0-0)                              |                                           | 9 (4-17)                      |                                    | 0 (0-0)                               |                                            | 8 (4-15)             |                              | 0 (0-0)                         |                                      |
| 2010 | France  | 16 (11-17)                   |                                   | 0 (0-0)                              |                                           | 14 (6-25)                     |                                    | 0 (0-1)                               |                                            | 12 (6-22)            |                              | 0 (0-1)                         |                                      |
| 2011 | France  | 9 (6-9)                      |                                   | 0 (0-0)                              |                                           | 7 (3-13)                      |                                    | 0 (0-0)                               |                                            | 6 (3-11)             |                              | 0 (0-0)                         |                                      |
| 2012 | France  | 7 (5-7)                      |                                   | 0 (0-0)                              |                                           | 5 (2-9)                       |                                    | 0 (0-0)                               |                                            | 5 (2-8)              |                              | 0 (0-0)                         |                                      |
| 2013 | France  | 6 (4-6)                      |                                   | 0 (0-0)                              |                                           | 5 (2-9)                       |                                    | 0 (0-0)                               |                                            | 4 (2-8)              |                              | 0 (0-0)                         |                                      |
| 2014 | France  | 6 (4-6)                      |                                   | 0 (0-0)                              |                                           | 4 (2-8)                       |                                    | 0 (0-0)                               |                                            | 4 (2-7)              |                              | 0 (0-0)                         |                                      |
| 2015 | France  | 6 (4-6)                      |                                   | 0 (0-0)                              |                                           | 4 (2-8)                       |                                    | 0 (0-0)                               |                                            | 4 (2-7)              |                              | 0 (0-0)                         |                                      |
| 2000 | Gabon   | 106 (75-111)                 |                                   | 58 (41-61)                           |                                           | 9 (4-19)                      |                                    | 5 (2-11)                              |                                            | 3 (1-6)              |                              | 2 (1-3)                         |                                      |
| 2001 | Gabon   | 110 (78-115)                 |                                   | 60 (42-62)                           |                                           | 10 (4-20)                     |                                    | 5 (2-11)                              |                                            | 3 (1-6)              |                              | 2 (1-3)                         |                                      |
| 2002 | Gabon   | 114 (81-119)                 |                                   | 61 (43-64)                           |                                           | 10 (4-21)                     |                                    | 5 (2-11)                              |                                            | 3 (1-7)              |                              | 2 (1-4)                         |                                      |
| 2003 | Gabon   | 118 (83-123)                 |                                   | 63 (44-65)                           |                                           | 11 (4-22)                     |                                    | 6 (2-12)                              |                                            | 3 (1-7)              |                              | 2 (1-4)                         |                                      |
| 2004 | Gabon   | 120 (85-125)                 |                                   | 63 (45-66)                           |                                           | 11 (5-22)                     |                                    | 6 (2-12)                              |                                            | 3 (1-7)              |                              | 2 (1-4)                         |                                      |
| 2005 | Gabon   | 122 (86-127)                 |                                   | 63 (45-66)                           |                                           | 11 (5-23)                     |                                    | 6 (2-12)                              |                                            | 3 (2-7)              |                              | 2 (1-4)                         |                                      |
| 2006 | Gabon   | 122 (87-128)                 |                                   | 63 (45-65)                           |                                           | 11 (4-23)                     |                                    | 6 (2-12)                              |                                            | 10 (4-21)            |                              | 5 (2-11)                        |                                      |
| 2007 | Gabon   | 123 (87-128)                 |                                   | 62 (44-65)                           |                                           | 11 (4-23)                     |                                    | 6 (2-12)                              |                                            | 10 (4-21)            |                              | 5 (2-11)                        |                                      |
| 2008 | Gabon   | 122 (86-127)                 |                                   | 60 (43-63)                           |                                           | 11 (4-23)                     |                                    | 5 (2-11)                              |                                            | 10 (4-21)            |                              | 5 (2-10)                        |                                      |
| 2009 | Gabon   | 121 (86-126)                 |                                   | 59 (42-61)                           |                                           | 11 (4-23)                     |                                    | 5 (2-11)                              |                                            | 10 (4-20)            |                              | 5 (2-10)                        |                                      |
| 2010 | Gabon   | 119 (85-124)                 |                                   | 56 (40-59)                           |                                           | 11 (4-22)                     |                                    | 5 (2-10)                              |                                            | 10 (4-20)            |                              | 5 (2-9)                         |                                      |
| 2011 | Gabon   | 119 (84-124)                 |                                   | 55 (39-57)                           |                                           | 11 (5-22)                     |                                    | 5 (2-10)                              |                                            | 10 (4-20)            |                              | 4 (2-9)                         |                                      |
| 2012 | Gabon   | 116 (83-121)                 |                                   | 52 (37-54)                           |                                           | 11 (5-21)                     |                                    | 5 (2-10)                              |                                            | 9 (4-19)             |                              | 4 (2-8)                         |                                      |
| 2013 | Gabon   | 114 (81-119)                 |                                   | 50 (36-52)                           |                                           | 10 (5-21)                     |                                    | 5 (2-9)                               |                                            | 9 (4-18)             |                              | 4 (2-8)                         |                                      |
| 2014 | Gabon   | 110 (78-115)                 |                                   | 48 (34-50)                           |                                           | 10 (4-20)                     |                                    | 4 (2-8)                               |                                            | 9 (4-18)             |                              | 4 (2-8)                         |                                      |
| 2015 | Gabon   | 107 (76-112)                 | 4 (3-4)                           | 46 (32-48)                           | 2 (1-2)                                   | 10 (4-19)                     | 0 (0-1)                            | 4 (2-8)                               | 0 (0-0)                                    | 9 (4-17)             | 0 (0-1)                      | 4 (2-7)                         | 0 (0-0)                              |
| 2000 | Gambia  | 343 (243-357)                |                                   | 151 (107-157)                        |                                           | 67 (35-124)                   |                                    | 30 (15-54)                            |                                            | 21 (11-39)           |                              | 9 (6-17)                        |                                      |
| 2001 | Gambia  | 335 (236-349)                |                                   | 142 (101-148)                        |                                           | 65 (33-121)                   |                                    | 28 (14-51)                            |                                            | 21 (10-38)           |                              | 9 (4-16)                        |                                      |
| 2002 | Gambia  | 343 (243-358)                |                                   | 141 (100-147)                        |                                           | 67 (34-124)                   |                                    | 28 (14-51)                            |                                            | 21 (11-39)           |                              | 9 (4-16)                        |                                      |
| 2003 | Gambia  | 341 (242-355)                |                                   | 136 (96-142)                         |                                           | 66 (33-124)                   |                                    | 26 (13-50)                            |                                            | 21 (10-39)           |                              | 8 (3-16)                        |                                      |
| 2004 | Gambia  | 337 (239-352)                |                                   | 131 (93-136)                         |                                           | 65 (32-123)                   |                                    | 25 (12-48)                            |                                            | 21 (10-39)           |                              | 8 (4-15)                        |                                      |
| 2005 | Gambia  | 336 (238-350)                |                                   | 126 (89-131)                         |                                           | 65 (31-123)                   |                                    | 24 (12-46)                            |                                            | 20 (10-39)           |                              | 8 (4-14)                        |                                      |
| 2006 | Gambia  | 334 (237-348)                |                                   | 121 (86-127)                         |                                           | 64 (31-122)                   |                                    | 23 (11-44)                            |                                            | 20 (10-38)           |                              | 7 (4-14)                        |                                      |
| 2007 | Gambia  | 330 (234-344)                |                                   | 116 (83-121)                         |                                           | 63 (31-120)                   |                                    | 22 (11-42)                            |                                            | 20 (10-38)           |                              | 7 (3-13)                        |                                      |
| 2008 | Gambia  | 327 (232-340)                |                                   | 112 (79-117)                         |                                           | 62 (30-119)                   |                                    | 21 (10-41)                            |                                            | 20 (9-37)            |                              | 7 (3-13)                        |                                      |
| 2009 | Gambia  | 324 (229-337)                |                                   | 108 (76-112)                         |                                           | 62 (30-118)                   |                                    | 21 (10-39)                            |                                            | 19 (9-37)            |                              | 6 (3-12)                        |                                      |
| 2010 | Gambia  | 280 (188-292)                |                                   | 90 (64-94)                           |                                           | 52 (25-99)                    |                                    | 17 (8-32)                             |                                            | 16 (8-31)            |                              | 5 (3-10)                        |                                      |
| 2011 | Gambia  | 228 (162-238)                |                                   | 71 (51-74)                           |                                           | 41 (20-79)                    |                                    | 13 (6-25)                             |                                            | 13 (6-25)            |                              | 4 (2-8)                         |                                      |
| 2012 | Gambia  | 166 (118-173)                |                                   | 50 (36-52)                           |                                           | 30 (14-57)                    |                                    | 9 (4-17)                              |                                            | 9 (4-18)             |                              | 3 (1-5)                         |                                      |
| 2013 | Gambia  | 150 (106-156)                |                                   | 44 (31-46)                           |                                           | 27 (12-54)                    |                                    | 8 (3-16)                              |                                            | 24 (10-48)           |                              | 7 (3-14)                        |                                      |
| 2014 | Gambia  | 111 (79-116)                 |                                   | 32 (22-33)                           |                                           | 20 (9-40)                     |                                    | 6 (2-11)                              |                                            | 18 (8-35)            |                              | 5 (2-10)                        |                                      |
| 2015 | Gambia  | 96 (69-100)                  | 11 (8-11)                         | 27 (19-28)                           | 3 (2-3)                                   | 17 (8-35)                     | 2 (1-4)                            | 5 (2-10)                              | 1 (0-1)                                    | 15 (7-31)            | 2 (1-3)                      | 4 (2-9)                         | 0 (0-1)                              |
| 2000 | Georgia | 69 (49-72)                   |                                   | 26 (18-27)                           |                                           | 13 (6-20)                     |                                    | 5 (2-7)                               |                                            | 11 (6-18)            |                              | 4 (2-7)                         |                                      |
| 2001 | Georgia | 59 (42-62)                   |                                   | 23 (17-24)                           |                                           | 11 (6-17)                     |                                    | 4 (2-7)                               |                                            | 9 (5-15)             |                              | 4 (2-6)                         |                                      |
| 2002 | Georgia | 52 (37-55)                   |                                   | 22 (15-23)                           |                                           | 9 (5-16)                      |                                    | 4 (2-6)                               |                                            | 8 (4-14)             |                              | 3 (2-6)                         |                                      |
| 2003 | Georgia | 47 (33-49)                   |                                   | 20 (14-21)                           |                                           | 8 (3-17)                      |                                    | 3 (1-7)                               |                                            | 7 (3-15)             |                              | 3 (1-7)                         |                                      |
| 2004 | Georgia | 43 (30-44)                   |                                   | 18 (13-19)                           |                                           | 7 (3-16)                      |                                    | 3 (1-7)                               |                                            | 6 (2-14)             |                              | 3 (1-6)                         |                                      |
| 2005 | Georgia | 39 (28-41)                   |                                   | 17 (12-18)                           |                                           | 6 (2-15)                      |                                    | 3 (1-7)                               |                                            | 6 (2-14)             |                              | 2 (1-6)                         |                                      |
| 2006 | Georgia | 36 (26-38)                   |                                   | 15 (11-16)                           |                                           | 6 (2-14)                      |                                    | 2 (1-6)                               |                                            | 5 (2-13)             |                              | 2 (1-5)                         |                                      |
| 2007 | Georgia | 33 (23-34)                   |                                   | 13 (9-14)                            |                                           | 5 (1-13)                      |                                    | 2 (1-5)                               |                                            | 5 (1-12)             |                              | 2 (1-5)                         |                                      |
| 2008 | Georgia | 30 (21-31)                   |                                   | 12 (8-12)                            |                                           | 5 (1-12)                      |                                    | 2 (0-5)                               |                                            | 4 (1-11)             |                              | 2 (0-4)                         |                                      |
| 2009 | Georgia | 27 (19-28)                   |                                   | 10 (7-11)                            |                                           | 4 (1-11)                      |                                    | 2 (0-4)                               |                                            | 4 (1-10)             |                              | 1 (0-4)                         |                                      |
| 2010 | Georgia | 26 (18-27)                   |                                   | 10 (7-10)                            |                                           | 6 (1-17)                      |                                    | 2 (1-7)                               |                                            | 6 (1-15)             |                              | 2 (0-6)                         |                                      |
| 2011 | Georgia | 25 (18-26)                   |                                   | 9 (7-10)                             |                                           | 7 (1-19)                      |                                    | 3 (1-7)                               |                                            | 6 (1-17)             |                              | 2 (0-6)                         |                                      |
| 2012 | Georgia | 22 (15-23)                   |                                   | 8 (6-8)                              |                                           | 6 (1-16)                      |                                    | 2 (0-6)                               |                                            | 5 (1-15)             |                              | 2 (0-5)                         |                                      |
| 2013 | Georgia | 19 (13-20)                   |                                   | 7 (5-7)                              |                                           | 5 (1-14)                      |                                    | 2 (0-5)                               |                                            | 5 (1-13)             |                              | 2 (0-5)                         |                                      |
| 2014 | Georgia | 17 (12-18)                   |                                   | 6 (4-7)                              |                                           | 5 (1-13)                      |                                    | 2 (0-5)                               |                                            | 4 (1-11)             |                              | 1 (0-4)                         |                                      |
| 2015 | Georgia | 15 (11-15)                   | 0 (0-0)                           | 5 (4-6)                              | 0 (0-0)                                   | 4 (1-11)                      | 0 (0-0)                            | 1 (0-4)                               | 0 (0-0)                                    | 4 (1-10)             | 0 (0-0)                      | 1 (0-4)                         | 0 (0-0)                              |
| 2000 | Germany | 29 (21-30)                   |                                   | 1 (1-1)                              |                                           | 27 (12-50)                    |                                    | 1 (0-1)                               |                                            | 24 (11-44)           |                              | 1 (0-1)                         |                                      |
| 2001 | Germany | 43 (31-45)                   |                                   | 1 (1-1)                              |                                           | 19 (9-35)                     |                                    | 0 (0-1)                               |                                            | 17 (8-31)            |                              | 0 (0-1)                         |                                      |
| 2002 | Germany | 37 (26-38)                   |                                   | 1 (1-1)                              |                                           | 28 (12-50)                    |                                    | 1 (0-1)                               |                                            | 25 (11-44)           |                              | 1 (0-1)                         |                                      |
| 2003 | Germany | 36 (26-38)                   |                                   | 1 (1-1)                              |                                           | 25 (11-45)                    |                                    | 1 (0-1)                               |                                            | 22 (10-40)           |                              | 1 (0-1)                         |                                      |
| 2004 | Germany | 34 (24-35)                   |                                   | 1 (1-1)                              |                                           | 25 (11-45)                    |                                    | 1 (0-1)                               |                                            | 22 (10-40)           |                              | 1 (0-1)                         |                                      |
| 2005 | Germany | 25 (18-26)                   |                                   | 1 (1-1)                              |                                           | 18 (8-33)                     |                                    | 1 (0-1)                               |                                            | 16 (7-29)            |                              | 0 (0-1)                         |                                      |
| 2006 | Germany | 19 (14-20)                   |                                   | 1 (0-1)                              |                                           | 21 (9-38)                     |                                    | 1 (0-1)                               |                                            | 18 (8-33)            |                              | 1 (0-1)                         |                                      |
| 2007 | Germany | 19 (13-20)                   |                                   | 1 (0-1)                              |                                           | 11 (5-20)                     |                                    | 0 (0-1)                               |                                            | 10 (4-18)            |                              | 0 (0-1)                         |                                      |
| 2008 | Germany | 20 (14-21)                   |                                   | 1 (0-1)                              |                                           | 9 (4-17)                      |                                    | 0 (0-1)                               |                                            | 8 (4-15)             |                              | 0 (0-0)                         |                                      |
| 2009 | Germany | 17 (12-18)                   |                                   | 1 (0-1)                              |                                           | 5 (2-10)                      |                                    | 0 (0-0)                               |                                            | 5 (2-9)              |                              | 0 (0-0)                         |                                      |
| 2010 | Germany | 5 (4-6)                      |                                   | 0 (0-0)                              |                                           | 3 (1-5)                       |                                    | 0 (0-0)                               |                                            | 3 (1-5)              |                              | 0 (0-0)                         |                                      |
| 2011 | Germany | 6 (4-6)                      |                                   | 0 (0-0)                              |                                           | 2 (1-4)                       |                                    | 0 (0-0)                               |                                            | 2 (1-3)              |                              | 0 (0-0)                         |                                      |
| 2012 | Germany | 4 (3-4)                      |                                   | 0 (0-0)                              |                                           | 2 (1-4)                       |                                    | 0 (0-0)                               |                                            | 2 (1-3)              |                              | 0 (0-0)                         |                                      |
| 2013 | Germany | 4 (3-4)                      |                                   | 0 (0-0)                              |                                           | 2 (1-3)                       |                                    | 0 (0-0)                               |                                            | 2 (1-3)              |                              | 0 (0-0)                         |                                      |
| 2014 | Germany | 4 (3-4)                      |                                   | 0 (0-0)                              |                                           | 2 (1-3)                       |                                    | 0 (0-0)                               |                                            | 1 (1-3)              |                              | 0 (0-0)                         |                                      |

Spn = *Streptococcus pneumoniae*; npnm = non-pneumonia, non-meningitis; HIV = deaths only in HIV-infected children; Uncertainty range provided in parentheses.



| Year | Country       | Spn pneumonia deaths (UR) | Spn pneumonia deaths, HIV (UR) | Spn pneumonia mortality rate (UR) | Spn pneumonia mortality rate, HIV (UR) | Spn meningitis deaths (UR) | Spn meningitis deaths, HIV (UR) | Spn meningitis mortality rate (UR) | Spn meningitis mortality rate, HIV (UR) | Spn NPNM deaths (UR) | Spn NPNM deaths, HIV (UR) | Spn NPNM mortality rate (UR) | Spn NPNM mortality rate, HIV (UR) |
|------|---------------|---------------------------|--------------------------------|-----------------------------------|----------------------------------------|----------------------------|---------------------------------|------------------------------------|-----------------------------------------|----------------------|---------------------------|------------------------------|-----------------------------------|
| 2015 | Germany       | 4 (3-4)                   | 0 (0-0)                        | 0 (0-0)                           | 0 (0-0)                                | 2 (1-3)                    | 0 (0-0)                         | 0 (0-0)                            | 0 (0-0)                                 | 1 (1-3)              | 0 (0-0)                   | 0 (0-0)                      | 0 (0-0)                           |
| 2000 | Ghana         | 2135 (1514-2225)          |                                | 76 (54-79)                        |                                        | 343 (147-712)              |                                 | 12 (5-25)                          |                                         | 108 (46-224)         |                           | 4 (2-8)                      |                                   |
| 2001 | Ghana         | 2195 (1557-2288)          |                                | 77 (55-80)                        |                                        | 348 (145-732)              |                                 | 12 (5-26)                          |                                         | 110 (45-230)         |                           | 4 (2-8)                      |                                   |
| 2002 | Ghana         | 2283 (1619-2380)          |                                | 78 (56-82)                        |                                        | 358 (144-761)              |                                 | 12 (5-26)                          |                                         | 113 (45-239)         |                           | 4 (2-8)                      |                                   |
| 2003 | Ghana         | 2328 (1651-2426)          |                                | 78 (55-81)                        |                                        | 361 (142-775)              |                                 | 12 (5-26)                          |                                         | 113 (45-244)         |                           | 4 (1-8)                      |                                   |
| 2004 | Ghana         | 2430 (1723-2533)          |                                | 79 (56-82)                        |                                        | 373 (142-809)              |                                 | 12 (5-26)                          |                                         | 117 (45-254)         |                           | 4 (1-8)                      |                                   |
| 2005 | Ghana         | 2512 (1781-2818)          |                                | 80 (57-83)                        |                                        | 382 (142-835)              |                                 | 12 (4-27)                          |                                         | 120 (45-263)         |                           | 4 (1-8)                      |                                   |
| 2006 | Ghana         | 2619 (1857-2729)          |                                | 81 (57-84)                        |                                        | 395 (142-868)              |                                 | 12 (4-27)                          |                                         | 124 (45-273)         |                           | 4 (1-8)                      |                                   |
| 2007 | Ghana         | 2633 (1867-2744)          |                                | 79 (56-83)                        |                                        | 395 (153-853)              |                                 | 12 (5-26)                          |                                         | 124 (48-268)         |                           | 4 (1-8)                      |                                   |
| 2008 | Ghana         | 2542 (1802-2649)          |                                | 75 (53-78)                        |                                        | 378 (159-801)              |                                 | 11 (5-24)                          |                                         | 119 (50-252)         |                           | 4 (1-7)                      |                                   |
| 2009 | Ghana         | 2522 (1789-2629)          |                                | 73 (52-76)                        |                                        | 371 (151-791)              |                                 | 11 (4-23)                          |                                         | 117 (47-249)         |                           | 3 (1-7)                      |                                   |
| 2010 | Ghana         | 2470 (1752-2575)          |                                | 70 (50-73)                        |                                        | 357 (118-791)              |                                 | 10 (3-22)                          |                                         | 318 (105-704)        |                           | 9 (3-20)                     |                                   |
| 2011 | Ghana         | 2490 (1768-2595)          |                                | 69 (49-72)                        |                                        | 353 (113-789)              |                                 | 10 (3-22)                          |                                         | 314 (100-702)        |                           | 9 (3-19)                     |                                   |
| 2012 | Ghana         | 2113 (1488-2202)          |                                | 57 (40-59)                        |                                        | 287 (96-637)               |                                 | 8 (3-17)                           |                                         | 256 (85-567)         |                           | 7 (2-15)                     |                                   |
| 2013 | Ghana         | 1605 (1138-1673)          |                                | 42 (30-44)                        |                                        | 207 (72-454)               |                                 | 5 (2-12)                           |                                         | 184 (64-404)         |                           | 5 (2-11)                     |                                   |
| 2014 | Ghana         | 1360 (964-1417)           |                                | 35 (25-36)                        |                                        | 177 (64-384)               |                                 | 5 (2-10)                           |                                         | 158 (57-342)         |                           | 4 (1-9)                      |                                   |
| 2015 | Ghana         | 1257 (891-1310)           | 72 (51-75)                     | 32 (22-33)                        | 2 (1-2)                                | 170 (64-364)               | 10 (4-21)                       | 4 (2-9)                            | 0 (0-1)                                 | 151 (57-324)         | 9 (3-19)                  | 4 (1-8)                      | 0 (0-0)                           |
| 2000 | Greece        | 8 (6-9)                   |                                | 2 (1-2)                           |                                        | 3 (2-6)                    |                                 | 1 (0-1)                            |                                         | 3 (1-5)              |                           | 1 (0-1)                      |                                   |
| 2001 | Greece        | 7 (5-8)                   |                                | 1 (1-1)                           |                                        | 2 (1-3)                    |                                 | 0 (0-1)                            |                                         | 2 (1-3)              |                           | 0 (0-1)                      |                                   |
| 2002 | Greece        | 6 (4-6)                   |                                | 1 (1-1)                           |                                        | 0 (0-1)                    |                                 | 0 (0-0)                            |                                         | 0 (0-1)              |                           | 0 (0-0)                      |                                   |
| 2003 | Greece        | 8 (6-9)                   |                                | 2 (1-2)                           |                                        | 2 (1-4)                    |                                 | 0 (0-1)                            |                                         | 2 (1-3)              |                           | 0 (0-1)                      |                                   |
| 2004 | Greece        | 9 (7-10)                  |                                | 2 (1-2)                           |                                        | 2 (1-3)                    |                                 | 0 (0-1)                            |                                         | 1 (1-3)              |                           | 0 (0-1)                      |                                   |
| 2005 | Greece        | 11 (8-12)                 |                                | 2 (2-2)                           |                                        | 1 (0-1)                    |                                 | 0 (0-0)                            |                                         | 1 (0-1)              |                           | 0 (0-0)                      |                                   |
| 2006 | Greece        | 13 (9-14)                 |                                | 3 (2-3)                           |                                        | 1 (1-2)                    |                                 | 0 (0-0)                            |                                         | 1 (0-2)              |                           | 0 (0-0)                      |                                   |
| 2007 | Greece        | 12 (8-12)                 |                                | 2 (2-2)                           |                                        | 1 (0-1)                    |                                 | 0 (0-0)                            |                                         | 1 (0-1)              |                           | 0 (0-0)                      |                                   |
| 2008 | Greece        | 12 (8-12)                 |                                | 2 (2-2)                           |                                        | 1 (1-2)                    |                                 | 0 (0-0)                            |                                         | 1 (0-2)              |                           | 0 (0-0)                      |                                   |
| 2009 | Greece        | 7 (5-7)                   |                                | 1 (1-1)                           |                                        | 2 (1-3)                    |                                 | 0 (0-1)                            |                                         | 1 (1-3)              |                           | 0 (0-0)                      |                                   |
| 2010 | Greece        | 5 (4-6)                   |                                | 1 (1-1)                           |                                        | 0 (0-1)                    |                                 | 0 (0-0)                            |                                         | 0 (0-0)              |                           | 0 (0-0)                      |                                   |
| 2011 | Greece        | 5 (4-5)                   |                                | 1 (1-1)                           |                                        | 1 (0-1)                    |                                 | 0 (0-0)                            |                                         | 1 (0-1)              |                           | 0 (0-0)                      |                                   |
| 2012 | Greece        | 8 (6-8)                   |                                | 1 (1-1)                           |                                        | 0 (0-1)                    |                                 | 0 (0-0)                            |                                         | 0 (0-1)              |                           | 0 (0-0)                      |                                   |
| 2013 | Greece        | 6 (4-8)                   |                                | 1 (1-1)                           |                                        | 0 (0-1)                    |                                 | 0 (0-0)                            |                                         | 0 (0-1)              |                           | 0 (0-0)                      |                                   |
| 2014 | Greece        | 3 (2-3)                   |                                | 1 (0-1)                           |                                        | 0 (0-0)                    |                                 | 0 (0-0)                            |                                         | 0 (0-0)              |                           | 0 (0-0)                      |                                   |
| 2015 | Greece        | 2 (1-2)                   | 0 (0-0)                        | 0 (0-0)                           | 0 (0-0)                                | 0 (0-0)                    | 0 (0-0)                         | 0 (0-0)                            | 0 (0-0)                                 | 0 (0-0)              | 0 (0-0)                   | 0 (0-0)                      | 0 (0-0)                           |
| 2000 | Grenada       | 1 (1-1)                   |                                | 11 (8-12)                         |                                        | 0 (0-0)                    |                                 | 0 (0-0)                            |                                         | 0 (0-0)              |                           | 0 (0-0)                      |                                   |
| 2001 | Grenada       | 1 (1-1)                   |                                | 10 (7-10)                         |                                        | 0 (0-0)                    |                                 | 0 (0-0)                            |                                         | 0 (0-0)              |                           | 0 (0-0)                      |                                   |
| 2002 | Grenada       | 1 (1-1)                   |                                | 7 (5-7)                           |                                        | 0 (0-0)                    |                                 | 0 (0-0)                            |                                         | 0 (0-0)              |                           | 0 (0-0)                      |                                   |
| 2003 | Grenada       | 0 (0-0)                   |                                | 3 (2-3)                           |                                        | 0 (0-0)                    |                                 | 0 (0-0)                            |                                         | 0 (0-0)              |                           | 0 (0-0)                      |                                   |
| 2004 | Grenada       | 1 (0-1)                   |                                | 7 (5-7)                           |                                        | 0 (0-0)                    |                                 | 0 (0-0)                            |                                         | 0 (0-0)              |                           | 0 (0-0)                      |                                   |
| 2005 | Grenada       | 1 (1-1)                   |                                | 11 (8-11)                         |                                        | 0 (0-0)                    |                                 | 0 (0-0)                            |                                         | 0 (0-0)              |                           | 0 (0-0)                      |                                   |
| 2006 | Grenada       | 1 (1-2)                   |                                | 16 (12-17)                        |                                        | 0 (0-0)                    |                                 | 0 (0-0)                            |                                         | 0 (0-0)              |                           | 0 (0-0)                      |                                   |
| 2007 | Grenada       | 1 (1-1)                   |                                | 12 (8-12)                         |                                        | 0 (0-0)                    |                                 | 0 (0-0)                            |                                         | 0 (0-0)              |                           | 0 (0-0)                      |                                   |
| 2008 | Grenada       | 1 (0-1)                   |                                | 7 (5-7)                           |                                        | 0 (0-0)                    |                                 | 0 (0-0)                            |                                         | 0 (0-0)              |                           | 0 (0-0)                      |                                   |
| 2009 | Grenada       | 0 (0-0)                   |                                | 1 (1-1)                           |                                        | 0 (0-0)                    |                                 | 0 (0-0)                            |                                         | 0 (0-0)              |                           | 0 (0-0)                      |                                   |
| 2010 | Grenada       | 0 (0-0)                   |                                | 2 (1-2)                           |                                        | 0 (0-0)                    |                                 | 0 (0-0)                            |                                         | 0 (0-0)              |                           | 0 (0-0)                      |                                   |
| 2011 | Grenada       | 0 (0-0)                   |                                | 2 (1-2)                           |                                        | 0 (0-0)                    |                                 | 0 (0-0)                            |                                         | 0 (0-0)              |                           | 0 (0-0)                      |                                   |
| 2012 | Grenada       | 0 (0-0)                   |                                | 4 (3-4)                           |                                        | 0 (0-0)                    |                                 | 0 (0-0)                            |                                         | 0 (0-0)              |                           | 0 (0-0)                      |                                   |
| 2013 | Grenada       | 0 (0-0)                   |                                | 3 (2-3)                           |                                        | 0 (0-0)                    |                                 | 0 (0-0)                            |                                         | 0 (0-0)              |                           | 0 (0-0)                      |                                   |
| 2014 | Grenada       | 0 (0-0)                   |                                | 4 (3-4)                           |                                        | 0 (0-0)                    |                                 | 0 (0-0)                            |                                         | 0 (0-0)              |                           | 0 (0-0)                      |                                   |
| 2015 | Grenada       | 0 (0-0)                   | 0 (0-0)                        | 3 (2-3)                           | 0 (0-0)                                | 0 (0-0)                    | 0 (0-0)                         | 0 (0-0)                            | 0 (0-0)                                 | 0 (0-0)              | 0 (0-0)                   | 0 (0-0)                      | 0 (0-0)                           |
| 2000 | Guatemala     | 1242 (881-1295)           |                                | 67 (48-70)                        |                                        | 118 (36-301)               |                                 | 6 (2-16)                           |                                         | 105 (32-268)         |                           | 6 (2-15)                     |                                   |
| 2001 | Guatemala     | 1167 (848-1247)           |                                | 64 (46-67)                        |                                        | 114 (35-289)               |                                 | 6 (2-16)                           |                                         | 101 (31-258)         |                           | 5 (2-14)                     |                                   |
| 2002 | Guatemala     | 1151 (816-1199)           |                                | 61 (43-64)                        |                                        | 110 (34-278)               |                                 | 6 (2-15)                           |                                         | 98 (30-248)          |                           | 5 (2-13)                     |                                   |
| 2003 | Guatemala     | 1102 (782-1149)           |                                | 58 (41-60)                        |                                        | 105 (33-266)               |                                 | 6 (2-14)                           |                                         | 94 (29-237)          |                           | 5 (2-12)                     |                                   |
| 2004 | Guatemala     | 1062 (753-1107)           |                                | 55 (39-58)                        |                                        | 102 (32-256)               |                                 | 5 (2-13)                           |                                         | 91 (28-228)          |                           | 5 (1-12)                     |                                   |
| 2005 | Guatemala     | 1021 (724-1064)           |                                | 53 (37-55)                        |                                        | 97 (31-244)                |                                 | 5 (2-13)                           |                                         | 87 (27-218)          |                           | 4 (1-11)                     |                                   |
| 2006 | Guatemala     | 977 (693-1018)            |                                | 50 (36-52)                        |                                        | 93 (29-232)                |                                 | 5 (2-12)                           |                                         | 83 (26-207)          |                           | 4 (1-11)                     |                                   |
| 2007 | Guatemala     | 933 (662-972)             |                                | 48 (34-50)                        |                                        | 89 (28-220)                |                                 | 5 (1-11)                           |                                         | 79 (25-196)          |                           | 4 (1-10)                     |                                   |
| 2008 | Guatemala     | 882 (625-919)             |                                | 45 (32-47)                        |                                        | 84 (27-208)                |                                 | 4 (1-11)                           |                                         | 75 (24-185)          |                           | 4 (1-9)                      |                                   |
| 2009 | Guatemala     | 849 (602-885)             |                                | 43 (31-45)                        |                                        | 81 (26-199)                |                                 | 4 (1-10)                           |                                         | 72 (23-178)          |                           | 4 (1-9)                      |                                   |
| 2010 | Guatemala     | 824 (584-859)             |                                | 42 (30-44)                        |                                        | 78 (25-193)                |                                 | 4 (1-10)                           |                                         | 70 (23-172)          |                           | 4 (1-9)                      |                                   |
| 2011 | Guatemala     | 806 (572-840)             |                                | 41 (29-43)                        |                                        | 76 (25-188)                |                                 | 4 (1-10)                           |                                         | 68 (22-167)          |                           | 3 (1-8)                      |                                   |
| 2012 | Guatemala     | 785 (557-818)             |                                | 40 (28-41)                        |                                        | 74 (24-182)                |                                 | 4 (1-9)                            |                                         | 66 (22-162)          |                           | 3 (1-8)                      |                                   |
| 2013 | Guatemala     | 698 (495-727)             |                                | 35 (25-36)                        |                                        | 65 (22-160)                |                                 | 3 (1-8)                            |                                         | 58 (19-142)          |                           | 3 (1-7)                      |                                   |
| 2014 | Guatemala     | 570 (404-594)             |                                | 28 (20-29)                        |                                        | 53 (18-129)                |                                 | 3 (1-6)                            |                                         | 47 (16-115)          |                           | 2 (1-6)                      |                                   |
| 2015 | Guatemala     | 421 (298-439)             | 8 (5-8)                        | 20 (15-21)                        | 0 (0-0)                                | 39 (10-116)                | 1 (0-2)                         | 2 (0-6)                            | 0 (0-0)                                 | 35 (9-103)           | 1 (0-2)                   | 2 (0-5)                      | 0 (0-0)                           |
| 2000 | Guinea        | 2545 (1805-2652)          |                                | 168 (119-175)                     |                                        | 472 (236-934)              |                                 | 31 (16-62)                         |                                         | 148 (74-294)         |                           | 10 (5-19)                    |                                   |
| 2001 | Guinea        | 2538 (1800-2645)          |                                | 165 (117-172)                     |                                        | 471 (241-925)              |                                 | 31 (16-60)                         |                                         | 148 (76-291)         |                           | 10 (5-19)                    |                                   |
| 2002 | Guinea        | 2515 (1783-2621)          |                                | 161 (114-168)                     |                                        | 467 (245-911)              |                                 | 30 (16-58)                         |                                         | 147 (77-286)         |                           | 9 (5-18)                     |                                   |
| 2003 | Guinea        | 2487 (1764-2592)          |                                | 158 (112-164)                     |                                        | 465 (167-1031)             |                                 | 29 (11-65)                         |                                         | 146 (52-324)         |                           | 9 (3-21)                     |                                   |
| 2004 | Guinea        | 2480 (1759-2585)          |                                | 155 (110-161)                     |                                        | 466 (174-1024)             |                                 | 29 (11-64)                         |                                         | 147 (55-322)         |                           | 9 (3-20)                     |                                   |
| 2005 | Guinea        | 2476 (1758-2580)          |                                | 152 (108-158)                     |                                        | 469 (182-1019)             |                                 | 29 (11-63)                         |                                         | 147 (57-320)         |                           | 9 (3-20)                     |                                   |
| 2006 | Guinea        | 2473 (1754-2577)          |                                | 149 (105-155)                     |                                        | 471 (181-1023)             |                                 | 28 (11-62)                         |                                         | 148 (57-322)         |                           | 9 (3-19)                     |                                   |
| 2007 | Guinea        | 2465 (1748-2569)          |                                | 145 (103-152)                     |                                        | 470 (180-1023)             |                                 | 28 (11-60)                         |                                         | 148 (57-322)         |                           | 9 (3-19)                     |                                   |
| 2008 | Guinea        | 2368 (1679-2468)          |                                | 137 (97-143)                      |                                        | 452 (172-985)              |                                 | 26 (10-57)                         |                                         | 142 (54-310)         |                           | 8 (3-18)                     |                                   |
| 2009 | Guinea        | 2382 (1689-2483)          |                                | 135 (96-141)                      |                                        | 454 (172-992)              |                                 | 26 (10-56)                         |                                         | 143 (54-312)         |                           | 8 (3-18)                     |                                   |
| 2010 | Guinea        | 2328 (1651-2426)          |                                | 129 (92-135)                      |                                        | 443 (167-970)              |                                 | 25 (9-54)                          |                                         | 139 (52-305)         |                           | 8 (3-17)                     |                                   |
| 2011 | Guinea        | 2280 (1617-2376)          |                                | 124 (88-129)                      |                                        | 432 (163-948)              |                                 | 23 (9-51)                          |                                         | 136 (51-298)         |                           | 7 (3-16)                     |                                   |
| 2012 | Guinea        | 2256 (1600-2351)          |                                | 120 (85-125)                      |                                        | 425 (158-935)              |                                 | 23 (8-50)                          |                                         | 134 (50-294)         |                           | 7 (3-16)                     |                                   |
| 2013 | Guinea        | 2264 (1605-2359)          |                                | 117 (83-122)                      |                                        | 424 (157-936)              |                                 | 22 (8-48)                          |                                         | 133 (50-294)         |                           | 7 (3-15)                     |                                   |
| 2014 | Guinea        | 2268 (1608-2364)          |                                | 115 (82-120)                      |                                        | 423 (156-935)              |                                 | 21 (8-47)                          |                                         | 133 (49-294)         |                           | 7 (2-15)                     |                                   |
| 2015 | Guinea        | 2246 (1593-2341)          | 92 (66-96)                     | 112 (79-116)                      | 5 (3-5)                                | 418 (154-926)              | 17 (6-38)                       | 21 (8-46)                          | 1 (0-2)                                 | 132 (48-291)         | 5 (2-12)                  | 7 (2-14)                     | 0 (0-1)                           |
| 2000 | Guinea-Bissau | 446 (317-465)             |                                | 206 (146-215)                     |                                        | 86 (52-145)                |                                 | 40 (24-67)                         |                                         | 27 (16-46)           |                           | 12 (7-21)                    |                                   |
| 2001 | Guinea-Bissau | 461 (327-480)             |                                | 210 (149-219)                     |                                        | 89 (53-151)                |                                 | 41 (24-69)                         |                                         | 28 (17-47)           |                           | 13 (6-22)                    |                                   |
| 2002 | Guinea-Bissau | 471 (334-491)             |                                | 212 (150-221)                     |                                        | 91 (54-155)                |                                 | 41 (24-70)                         |                                         | 29 (17-48)           |                           | 13 (6-22)                    |                                   |
| 2003 | Guinea-Bissau | 478 (339-498)             |                                | 212 (150-220)                     |                                        | 92 (55-159)                |                                 | 41 (24-70)                         |                                         | 29 (17-50)           |                           | 13 (6-22)                    |                                   |
| 2004 | Guinea-Bissau | 477 (338-497)             |                                | 208 (147-217)                     |                                        | 91 (54-159)                |                                 | 40 (24-69)                         |                                         | 29 (17-50)           |                           | 13 (7-22)                    |                                   |
| 2005 | Guinea-Bissau | 469 (332-488)             |                                | 201 (142-209)                     |                                        | 89 (39-177)                |                                 | 38 (17-76)                         |                                         | 28 (12-56)           |                           | 12 (6-24)                    |                                   |
| 2006 | Guinea-Bissau | 456 (323-475)             |                                | 191 (135-199)</                   |                                        |                            |                                 |                                    |                                         |                      |                           |                              |                                   |

| Year | Country       | Spn pneumonia deaths (UR) | Spn pneumonia deaths, HIV (UR) | Spn pneumonia mortality rate (UR) | Spn pneumonia mortality rate, HIV (UR) | Spn meningitis deaths (UR) | Spn meningitis deaths, HIV (UR) | Spn meningitis mortality rate (UR) | Spn meningitis mortality rate, HIV (UR) | Spn NPNM deaths (UR) | Spn NPNM deaths, HIV (UR) | Spn NPNM mortality rate (UR) | Spn NPNM mortality rate, HIV (UR) |
|------|---------------|---------------------------|--------------------------------|-----------------------------------|----------------------------------------|----------------------------|---------------------------------|------------------------------------|-----------------------------------------|----------------------|---------------------------|------------------------------|-----------------------------------|
| 2007 | Guinea-Bissau | 439 (311-458)             |                                | 181 (128-189)                     |                                        | 82 (35-167)                |                                 | 34 (14-69)                         |                                         | 26 (11-52)           |                           | 11 (5-22)                    |                                   |
| 2008 | Guinea-Bissau | 420 (298-438)             |                                | 170 (121-178)                     |                                        | 77 (33-159)                |                                 | 31 (13-65)                         |                                         | 24 (10-50)           |                           | 10 (4-20)                    |                                   |
| 2009 | Guinea-Bissau | 402 (285-419)             |                                | 160 (114-167)                     |                                        | 73 (31-152)                |                                 | 29 (12-61)                         |                                         | 23 (10-48)           |                           | 9 (4-19)                     |                                   |
| 2010 | Guinea-Bissau | 386 (274-403)             |                                | 151 (107-157)                     |                                        | 70 (29-146)                |                                 | 27 (11-57)                         |                                         | 22 (9-46)            |                           | 9 (4-18)                     |                                   |
| 2011 | Guinea-Bissau | 371 (263-387)             |                                | 142 (100-147)                     |                                        | 67 (27-142)                |                                 | 25 (10-54)                         |                                         | 21 (8-45)            |                           | 8 (3-17)                     |                                   |
| 2012 | Guinea-Bissau | 359 (255-374)             |                                | 134 (95-140)                      |                                        | 64 (25-138)                |                                 | 24 (9-52)                          |                                         | 20 (8-43)            |                           | 8 (3-16)                     |                                   |
| 2013 | Guinea-Bissau | 350 (248-365)             |                                | 128 (91-133)                      |                                        | 62 (23-136)                |                                 | 23 (9-50)                          |                                         | 20 (7-43)            |                           | 7 (3-16)                     |                                   |
| 2014 | Guinea-Bissau | 343 (243-358)             |                                | 123 (87-128)                      |                                        | 61 (22-134)                |                                 | 22 (8-48)                          |                                         | 19 (7-42)            |                           | 7 (2-15)                     |                                   |
| 2015 | Guinea-Bissau | 320 (227-333)             | 96 (68-100)                    | 113 (80-117)                      | 34 (24-35)                             | 56 (20-126)                | 17 (6-37)                       | 20 (7-44)                          | 6 (2-13)                                | 18 (6-39)            | 5 (2-12)                  | 6 (2-14)                     | 2 (1-4)                           |
| 2000 | Guyana        | 21 (15-22)                |                                | 22 (16-23)                        |                                        | 2 (1-4)                    |                                 | 2 (1-4)                            |                                         | 1 (1-3)              |                           | 2 (1-4)                      |                                   |
| 2001 | Guyana        | 19 (13-19)                |                                | 20 (14-21)                        |                                        | 4 (2-10)                   |                                 | 5 (2-11)                           |                                         | 4 (1-9)              |                           | 4 (1-10)                     |                                   |
| 2002 | Guyana        | 26 (18-27)                |                                | 28 (20-29)                        |                                        | 3 (1-7)                    |                                 | 3 (1-8)                            |                                         | 3 (1-6)              |                           | 3 (1-7)                      |                                   |
| 2003 | Guyana        | 18 (13-19)                |                                | 20 (15-21)                        |                                        | 4 (1-9)                    |                                 | 4 (1-10)                           |                                         | 3 (1-8)              |                           | 4 (1-9)                      |                                   |
| 2004 | Guyana        | 21 (15-22)                |                                | 24 (17-25)                        |                                        | 4 (1-9)                    |                                 | 4 (1-11)                           |                                         | 3 (1-8)              |                           | 4 (1-10)                     |                                   |
| 2005 | Guyana        | 17 (12-18)                |                                | 20 (15-21)                        |                                        | 4 (1-10)                   |                                 | 5 (1-12)                           |                                         | 3 (1-9)              |                           | 4 (1-10)                     |                                   |
| 2006 | Guyana        | 17 (12-18)                |                                | 22 (15-22)                        |                                        | 2 (1-6)                    |                                 | 3 (1-7)                            |                                         | 2 (1-5)              |                           | 3 (1-6)                      |                                   |
| 2007 | Guyana        | 15 (10-15)                |                                | 20 (14-20)                        |                                        | 3 (1-8)                    |                                 | 4 (1-10)                           |                                         | 3 (1-7)              |                           | 4 (1-9)                      |                                   |
| 2008 | Guyana        | 12 (9-13)                 |                                | 18 (12-18)                        |                                        | 3 (1-7)                    |                                 | 4 (1-10)                           |                                         | 3 (1-6)              |                           | 4 (1-9)                      |                                   |
| 2009 | Guyana        | 13 (9-14)                 |                                | 19 (14-20)                        |                                        | 6 (2-14)                   |                                 | 9 (3-22)                           |                                         | 5 (2-13)             |                           | 8 (2-19)                     |                                   |
| 2010 | Guyana        | 12 (8-12)                 |                                | 18 (13-19)                        |                                        | 1 (0-4)                    |                                 | 2 (1-6)                            |                                         | 1 (0-3)              |                           | 2 (1-5)                      |                                   |
| 2011 | Guyana        | 10 (7-11)                 |                                | 17 (12-18)                        |                                        | 3 (1-7)                    |                                 | 5 (2-12)                           |                                         | 3 (1-6)              |                           | 4 (2-11)                     |                                   |
| 2012 | Guyana        | 8 (5-8)                   |                                | 13 (9-13)                         |                                        | 2 (1-5)                    |                                 | 4 (1-8)                            |                                         | 2 (1-4)              |                           | 3 (1-7)                      |                                   |
| 2013 | Guyana        | 7 (5-7)                   |                                | 11 (8-12)                         |                                        | 2 (1-5)                    |                                 | 3 (1-7)                            |                                         | 2 (1-4)              |                           | 3 (1-7)                      |                                   |
| 2014 | Guyana        | 7 (5-7)                   |                                | 10 (7-11)                         |                                        | 2 (1-4)                    |                                 | 3 (1-7)                            |                                         | 2 (1-4)              |                           | 3 (1-6)                      |                                   |
| 2015 | Guyana        | 5 (4-5)                   | 0 (0-0)                        | 8 (5-8)                           | 0 (0-0)                                | 1 (1-3)                    | 0 (0-0)                         | 2 (1-5)                            | 0 (0-0)                                 | 1 (1-3)              | 0 (0-0)                   | 2 (1-4)                      | 0 (0-0)                           |
| 2000 | Haiti         | 1883 (1335-1962)          |                                | 157 (111-164)                     |                                        | 238 (61-678)               |                                 | 20 (5-57)                          |                                         | 75 (19-213)          |                           | 6 (2-16)                     |                                   |
| 2001 | Haiti         | 1806 (1280-1882)          |                                | 150 (106-156)                     |                                        | 229 (59-652)               |                                 | 19 (5-54)                          |                                         | 72 (19-205)          |                           | 6 (2-17)                     |                                   |
| 2002 | Haiti         | 1726 (1224-1799)          |                                | 143 (101-149)                     |                                        | 220 (57-626)               |                                 | 18 (5-52)                          |                                         | 69 (18-197)          |                           | 6 (1-16)                     |                                   |
| 2003 | Haiti         | 1648 (1169-1718)          |                                | 137 (97-142)                      |                                        | 212 (56-599)               |                                 | 18 (5-50)                          |                                         | 67 (18-188)          |                           | 6 (1-16)                     |                                   |
| 2004 | Haiti         | 1583 (1122-1650)          |                                | 131 (93-137)                      |                                        | 204 (54-577)               |                                 | 17 (5-48)                          |                                         | 64 (17-182)          |                           | 5 (1-15)                     |                                   |
| 2005 | Haiti         | 1542 (1093-1607)          |                                | 128 (91-133)                      |                                        | 200 (53-563)               |                                 | 17 (4-47)                          |                                         | 63 (17-177)          |                           | 5 (1-15)                     |                                   |
| 2006 | Haiti         | 1514 (1074-1578)          |                                | 125 (89-131)                      |                                        | 197 (53-554)               |                                 | 16 (4-46)                          |                                         | 62 (17-174)          |                           | 5 (1-14)                     |                                   |
| 2007 | Haiti         | 1492 (1058-1555)          |                                | 123 (87-128)                      |                                        | 195 (52-546)               |                                 | 16 (4-45)                          |                                         | 61 (16-172)          |                           | 5 (1-14)                     |                                   |
| 2008 | Haiti         | 1469 (1042-1531)          |                                | 121 (86-126)                      |                                        | 193 (52-537)               |                                 | 16 (4-44)                          |                                         | 61 (16-169)          |                           | 5 (1-14)                     |                                   |
| 2009 | Haiti         | 1442 (1023-1503)          |                                | 118 (84-123)                      |                                        | 191 (52-527)               |                                 | 16 (4-43)                          |                                         | 60 (16-166)          |                           | 5 (1-14)                     |                                   |
| 2010 | Haiti         | 5516 (3911-5748)          |                                | 450 (319-469)                     |                                        | 732 (309-1743)             |                                 | 60 (25-142)                        |                                         | 230 (97-548)         |                           | 19 (8-45)                    |                                   |
| 2011 | Haiti         | 1376 (976-1434)           |                                | 112 (79-116)                      |                                        | 182 (51-500)               |                                 | 15 (4-41)                          |                                         | 57 (16-157)          |                           | 5 (1-13)                     |                                   |
| 2012 | Haiti         | 1344 (953-1401)           |                                | 108 (77-114)                      |                                        | 177 (50-485)               |                                 | 14 (4-39)                          |                                         | 56 (16-153)          |                           | 5 (1-12)                     |                                   |
| 2013 | Haiti         | 1297 (920-1351)           |                                | 106 (75-110)                      |                                        | 169 (38-481)               |                                 | 14 (3-39)                          |                                         | 151 (35-428)         |                           | 12 (3-35)                    |                                   |
| 2014 | Haiti         | 1260 (894-1313)           |                                | 103 (73-108)                      |                                        | 163 (38-465)               |                                 | 13 (3-38)                          |                                         | 146 (34-414)         |                           | 12 (3-34)                    |                                   |
| 2015 | Haiti         | 1217 (863-1269)           | 41 (29-43)                     | 100 (71-104)                      | 3 (2-4)                                | 157 (37-448)               | 5 (1-15)                        | 13 (3-37)                          | 0 (0-1)                                 | 140 (33-399)         | 5 (1-14)                  | 12 (3-33)                    | 0 (0-1)                           |
| 2000 | Honduras      | 417 (296-435)             |                                | 45 (32-47)                        |                                        | 43 (12-116)                |                                 | 5 (1-12)                           |                                         | 38 (10-103)          |                           | 4 (1-11)                     |                                   |
| 2001 | Honduras      | 388 (275-404)             |                                | 42 (30-43)                        |                                        | 42 (11-112)                |                                 | 4 (1-12)                           |                                         | 37 (10-100)          |                           | 4 (1-11)                     |                                   |
| 2002 | Honduras      | 350 (249-365)             |                                | 38 (27-39)                        |                                        | 38 (10-101)                |                                 | 4 (1-11)                           |                                         | 34 (9-90)            |                           | 4 (1-10)                     |                                   |
| 2003 | Honduras      | 320 (227-334)             |                                | 35 (25-36)                        |                                        | 34 (10-92)                 |                                 | 4 (1-10)                           |                                         | 31 (8-82)            |                           | 3 (1-9)                      |                                   |
| 2004 | Honduras      | 296 (210-308)             |                                | 32 (23-34)                        |                                        | 32 (9-85)                  |                                 | 3 (1-9)                            |                                         | 28 (8-76)            |                           | 3 (1-8)                      |                                   |
| 2005 | Honduras      | 280 (198-291)             |                                | 31 (22-32)                        |                                        | 31 (9-83)                  |                                 | 3 (1-9)                            |                                         | 28 (8-74)            |                           | 3 (1-8)                      |                                   |
| 2006 | Honduras      | 258 (183-268)             |                                | 29 (20-30)                        |                                        | 29 (8-82)                  |                                 | 3 (1-10)                           |                                         | 26 (5-82)            |                           | 3 (1-9)                      |                                   |
| 2007 | Honduras      | 239 (169-249)             |                                | 27 (19-28)                        |                                        | 27 (5-85)                  |                                 | 3 (1-10)                           |                                         | 24 (5-76)            |                           | 3 (1-9)                      |                                   |
| 2008 | Honduras      | 223 (158-232)             |                                | 25 (18-27)                        |                                        | 25 (5-79)                  |                                 | 3 (1-9)                            |                                         | 22 (5-71)            |                           | 3 (1-8)                      |                                   |
| 2009 | Honduras      | 209 (148-218)             |                                | 24 (17-25)                        |                                        | 24 (5-74)                  |                                 | 3 (1-9)                            |                                         | 21 (4-66)            |                           | 2 (1-8)                      |                                   |
| 2010 | Honduras      | 196 (139-204)             |                                | 23 (16-24)                        |                                        | 23 (6-69)                  |                                 | 3 (1-8)                            |                                         | 20 (4-61)            |                           | 2 (0-7)                      |                                   |
| 2011 | Honduras      | 137 (97-143)              |                                | 16 (11-17)                        |                                        | 14 (3-45)                  |                                 | 2 (0-5)                            |                                         | 13 (3-40)            |                           | 2 (0-5)                      |                                   |
| 2012 | Honduras      | 102 (72-106)              |                                | 12 (9-13)                         |                                        | 10 (2-32)                  |                                 | 1 (0-4)                            |                                         | 9 (2-29)             |                           | 1 (0-3)                      |                                   |
| 2013 | Honduras      | 86 (61-90)                |                                | 11 (7-11)                         |                                        | 9 (2-28)                   |                                 | 1 (0-3)                            |                                         | 8 (2-25)             |                           | 1 (0-3)                      |                                   |
| 2014 | Honduras      | 78 (55-81)                |                                | 10 (7-10)                         |                                        | 8 (2-25)                   |                                 | 1 (0-3)                            |                                         | 7 (2-22)             |                           | 1 (0-3)                      |                                   |
| 2015 | Honduras      | 53 (38-55)                | 1 (0-1)                        | 7 (5-7)                           | 0 (0-0)                                | 5 (1-16)                   | 0 (0-0)                         | 1 (0-2)                            | 0 (0-0)                                 | 5 (1-14)             | 0 (0-0)                   | 1 (0-2)                      | 0 (0-0)                           |
| 2000 | Hungary       | 23 (16-24)                |                                | 5 (3-5)                           |                                        | 5 (0-1)                    |                                 | 1 (0-1)                            |                                         | 3 (2-6)              |                           | 1 (0-1)                      |                                   |
| 2001 | Hungary       | 16 (11-16)                |                                | 3 (2-4)                           |                                        | 6 (3-12)                   |                                 | 1 (1-3)                            |                                         | 6 (3-10)             |                           | 1 (1-2)                      |                                   |
| 2002 | Hungary       | 10 (7-10)                 |                                | 2 (2-2)                           |                                        | 4 (2-7)                    |                                 | 1 (0-2)                            |                                         | 3 (2-6)              |                           | 1 (0-1)                      |                                   |
| 2003 | Hungary       | 16 (12-17)                |                                | 4 (3-4)                           |                                        | 3 (1-6)                    |                                 | 1 (0-1)                            |                                         | 3 (1-5)              |                           | 1 (0-1)                      |                                   |
| 2004 | Hungary       | 13 (9-14)                 |                                | 3 (2-3)                           |                                        | 6 (3-11)                   |                                 | 1 (1-2)                            |                                         | 5 (2-10)             |                           | 1 (1-2)                      |                                   |
| 2005 | Hungary       | 16 (12-17)                |                                | 3 (2-4)                           |                                        | 7 (3-12)                   |                                 | 1 (1-3)                            |                                         | 6 (3-11)             |                           | 1 (1-2)                      |                                   |
| 2006 | Hungary       | 10 (7-11)                 |                                | 2 (2-2)                           |                                        | 5 (2-8)                    |                                 | 1 (0-2)                            |                                         | 4 (2-7)              |                           | 1 (0-2)                      |                                   |
| 2007 | Hungary       | 15 (11-16)                |                                | 3 (2-3)                           |                                        | 4 (2-7)                    |                                 | 1 (0-1)                            |                                         | 3 (2-6)              |                           | 1 (0-1)                      |                                   |
| 2008 | Hungary       | 8 (6-8)                   |                                | 2 (1-2)                           |                                        | 4 (2-7)                    |                                 | 1 (0-1)                            |                                         | 3 (1-6)              |                           | 1 (0-1)                      |                                   |
| 2009 | Hungary       | 8 (6-9)                   |                                | 2 (1-2)                           |                                        | 3 (2-6)                    |                                 | 1 (0-1)                            |                                         | 3 (1-6)              |                           | 1 (0-1)                      |                                   |
| 2010 | Hungary       | 9 (6-9)                   |                                | 2 (1-2)                           |                                        | 3 (1-5)                    |                                 | 1 (0-1)                            |                                         | 2 (1-4)              |                           | 1 (0-1)                      |                                   |
| 2011 | Hungary       | 7 (5-8)                   |                                | 2 (1-2)                           |                                        | 2 (1-3)                    |                                 | 0 (0-1)                            |                                         | 1 (1-3)              |                           | 0 (0-1)                      |                                   |
| 2012 | Hungary       | 6 (4-6)                   |                                | 1 (1-1)                           |                                        | 1 (0-1)                    |                                 | 0 (0-0)                            |                                         | 1 (0-1)              |                           | 0 (0-0)                      |                                   |
| 2013 | Hungary       | 4 (3-4)                   |                                | 1 (0-1)                           |                                        | 1 (0-1)                    |                                 | 0 (0-1)                            |                                         | 2 (1-3)              |                           | 0 (0-1)                      |                                   |
| 2014 | Hungary       | 4 (3-4)                   |                                | 1 (1-1)                           |                                        | 1 (1-2)                    |                                 | 0 (0-0)                            |                                         | 1 (0-2)              |                           | 0 (0-0)                      |                                   |
| 2015 | Hungary       | 3 (2-3)                   | 0 (0-0)                        | 1 (0-1)                           | 0 (0-0)                                | 1 (0-1)                    | 0 (0-0)                         | 0 (0-0)                            | 0 (0-0)                                 | 1 (0-1)              | 0 (0-0)                   | 0 (0-0)                      | 0 (0-0)                           |
| 2000 | Iceland       | 0 (0-0)                   |                                | 0 (0-0)                           |                                        | 0 (0-0)                    |                                 | 0 (0-0)                            |                                         | 0 (0-0)              |                           | 0 (0-0)                      |                                   |
| 2001 | Iceland       | 0 (0-0)                   |                                | 0 (0-0)                           |                                        | 0 (0-0)                    |                                 | 0 (0-0)                            |                                         | 0 (0-0)              |                           | 0 (0-0)                      |                                   |
| 2002 | Iceland       | 0 (0-0)                   |                                | 0 (0-0)                           |                                        | 0 (0-0)                    |                                 | 1 (0-2)                            |                                         | 0 (0-0)              |                           | 1 (0-2)                      |                                   |
| 2003 | Iceland       | 0 (0-0)                   |                                | 1 (1-1)                           |                                        | 0 (0-0)                    |                                 | 1 (1-1)                            |                                         | 0 (0-0)              |                           | 1 (0-2)                      |                                   |
| 2004 | Iceland       | 0 (0-0)                   |                                | 1 (1-1)                           |                                        | 0 (0-0)                    |                                 | 1 (1-2)                            |                                         | 0 (0-0)              |                           | 1 (0-2)                      |                                   |
| 2005 | Iceland       | 0 (0-0)                   |                                | 1 (0-1)                           |                                        | 0 (0-0)                    |                                 | 1 (0-1)                            |                                         | 0 (0-0)              |                           | 1 (0-1)                      |                                   |
| 2006 | Iceland       | 0 (0-0)                   |                                | 0 (0-0)                           |                                        | 0 (0-0)                    |                                 | 1 (0-1)                            |                                         | 0 (0-0)              |                           | 1 (0-1)                      |                                   |
| 2007 | Iceland       | 0 (0-0)                   |                                | 0 (0-0)                           |                                        | 0 (0-0)                    |                                 | 1 (0-1)                            |                                         | 0 (0-0)              |                           | 1 (0-1)                      |                                   |
| 2008 | Iceland       | 0 (0-0)                   |                                | 0 (0-0)                           |                                        | 0 (0-0)                    |                                 | 0 (0-0)                            |                                         | 0 (0-0)              |                           | 0 (0-0)                      |                                   |
| 2009 | Iceland       | 0 (0-0)                   |                                | 0 (0-0)                           |                                        | 0 (0-0)                    |                                 | 0 (0-0)                            |                                         | 0 (0-0)              |                           | 0 (0-0)                      |                                   |
| 2010 | Iceland       | 0 (0-0)                   |                                | 0 (0-0)                           |                                        | 0 (0-0)                    |                                 | 0 (0-0)                            |                                         | 0 (0-0)              |                           | 0 (0-0)                      |                                   |
| 2011 | Iceland       | 0 (0-0)                   |                                | 0 (0-0)                           |                                        | 0 (0-0)                    |                                 | 0 (0-0)                            |                                         | 0 (0-0)              |                           | 0 (0-0)                      |                                   |
| 2012 | Iceland       | 0 (0-0)                   |                                | 0 (0-0)                           |                                        | 0 (0-0)                    |                                 | 0 (0-0)                            |                                         | 0 (0-0)              |                           | 0 (0-0)                      |                                   |
| 2013 | Iceland       | 0 (0-0)                   |                                | 0 (0-0)                           |                                        | 0 (0-0)                    |                                 | 0 (0-0)                            |                                         | 0 (0-0)              |                           | 0 (0-0)                      |                                   |
| 2014 | Iceland       | 0 (0-0)                   |                                | 0 (0-0)                           |                                        | 0 (0-0)                    |                                 | 0 (0-0)                            |                                         | 0 (0-0)              |                           | 0 (0-0)                      |                                   |
| 2015 | Iceland       | 0 (0-0)                   |                                | 0 (0-0)                           |                                        | 0 (0-0)                    |                                 | 0 (0-0)                            |                                         | 0 (0-0)              |                           | 0 (0-0)                      |                                   |

Spn = *Streptococcus pneumoniae*; npnm = non-pneumonia, non-meningitis; HIV = deaths only in HIV-infected children; Uncertainty range provided in parentheses.

| Year | Country                    | Spn pneumonia deaths      |                                |                                   |                                        | Spn meningitis deaths      |                                 |                                    |                                         | Spn NPNM deaths, HIV |                           |                              |                                   |
|------|----------------------------|---------------------------|--------------------------------|-----------------------------------|----------------------------------------|----------------------------|---------------------------------|------------------------------------|-----------------------------------------|----------------------|---------------------------|------------------------------|-----------------------------------|
|      |                            | Spn pneumonia deaths (UR) | Spn pneumonia deaths, HIV (UR) | Spn pneumonia mortality rate (UR) | Spn pneumonia mortality rate, HIV (UR) | Spn meningitis deaths (UR) | Spn meningitis deaths, HIV (UR) | Spn meningitis mortality rate (UR) | Spn meningitis mortality rate, HIV (UR) | Spn NPNM deaths (UR) | Spn NPNM deaths, HIV (UR) | Spn NPNM mortality rate (UR) | Spn NPNM mortality rate, HIV (UR) |
| 2015 | Iceland                    | 0 (0-0)                   |                                | 0 (0-0)                           | 0 (0-0)                                | 0 (0-0)                    |                                 | 0 (0-0)                            | 0 (0-0)                                 | 0 (0-0)              |                           | 0 (0-0)                      | 0 (0-0)                           |
| 2000 | India                      | 135807 (96300-141532)     |                                | 108 (77-113)                      |                                        | 20968 (9949-40003)         |                                 | 17 (8-32)                          |                                         | 8753 (4125-16722)    |                           | 0 (0-0)                      | 7 (3-13)                          |
| 2001 | India                      | 130030 (92204-135511)     |                                | 103 (73-107)                      |                                        | 20069 (9462-38367)         |                                 | 16 (7-30)                          |                                         | 9079 (4231-17419)    |                           | 0 (0-0)                      | 7 (3-14)                          |
| 2002 | India                      | 124116 (88010-129348)     |                                | 98 (69-102)                       |                                        | 19152 (9030-36622)         |                                 | 15 (7-29)                          |                                         | 8629 (4021-16562)    |                           | 0 (0-0)                      | 7 (3-13)                          |
| 2003 | India                      | 118216 (83827-123199)     |                                | 93 (66-97)                        |                                        | 18239 (8551-34937)         |                                 | 14 (7-27)                          |                                         | 8667 (3986-17277)    |                           | 0 (0-0)                      | 7 (3-13)                          |
| 2004 | India                      | 112017 (79431-116139)     |                                | 86 (62-92)                        |                                        | 17286 (8086-33121)         |                                 | 14 (6-26)                          |                                         | 8397 (3852-16194)    |                           | 0 (0-0)                      | 7 (3-13)                          |
| 2005 | India                      | 105898 (75092-110362)     |                                | 83 (59-87)                        |                                        | 16352 (7719-31246)         |                                 | 13 (6-25)                          |                                         | 7913 (3687-15182)    |                           | 0 (0-0)                      | 6 (3-12)                          |
| 2006 | India                      | 100185 (71041-104408)     |                                | 78 (56-82)                        |                                        | 15480 (7289-29587)         |                                 | 12 (6-23)                          |                                         | 8588 (4026-16397)    |                           | 0 (0-0)                      | 7 (3-13)                          |
| 2007 | India                      | 94169 (66775-98139)       |                                | 74 (52-77)                        |                                        | 14564 (6914-27763)         |                                 | 11 (5-22)                          |                                         | 8259 (3914-15724)    |                           | 0 (0-0)                      | 6 (3-12)                          |
| 2008 | India                      | 88270 (62592-91991)       |                                | 69 (49-72)                        |                                        | 13653 (6478-26027)         |                                 | 11 (5-20)                          |                                         | 7731 (3659-14709)    |                           | 0 (0-0)                      | 6 (3-12)                          |
| 2009 | India                      | 82173 (56269-85637)       |                                | 65 (46-67)                        |                                        | 12701 (5972-24286)         |                                 | 10 (5-19)                          |                                         | 7731 (3620-14759)    |                           | 0 (0-0)                      | 6 (3-12)                          |
| 2010 | India                      | 76701 (54388-79934)       |                                | 61 (43-83)                        |                                        | 11638 (5565-22678)         |                                 | 9 (4-19)                           |                                         | 7195 (3366-13753)    |                           | 0 (0-0)                      | 6 (3-11)                          |
| 2011 | India                      | 71503 (50702-74517)       |                                | 57 (40-59)                        |                                        | 11016 (4985-21407)         |                                 | 9 (4-17)                           |                                         | 6762 (3068-16981)    |                           | 0 (0-0)                      | 7 (3-14)                          |
| 2012 | India                      | 65782 (46646-68555)       |                                | 53 (37-55)                        |                                        | 10119 (4562-19827)         |                                 | 8 (4-16)                           |                                         | 6012 (2613-15663)    |                           | 0 (0-0)                      | 6 (3-13)                          |
| 2013 | India                      | 61383 (43527-63971)       |                                | 50 (35-52)                        |                                        | 9432 (4197-18554)          |                                 | 8 (3-15)                           |                                         | 8036 (3576-15792)    |                           | 0 (0-0)                      | 7 (3-13)                          |
| 2014 | India                      | 56921 (40362-59320)       |                                | 47 (33-48)                        |                                        | 8739 (3892-17234)          |                                 | 7 (3-14)                           |                                         | 7421 (3306-14620)    |                           | 0 (0-0)                      | 6 (3-12)                          |
| 2015 | India                      | 53296 (37792-55542)       | 747 (530-779)                  | 44 (31-46)                        | 1 (0-1)                                | 8179 (3612-16163)          | 122 (54-241)                    | 7 (3-13)                           | 0 (0-0)                                 | 7226 (3191-14277)    | 108 (48-213)              | 0 (0-0)                      | 6 (3-12)                          |
| 2000 | Indonesia                  | 12608 (8941-13140)        |                                | 60 (43-63)                        |                                        | 1521 (651-3294)            |                                 | 7 (3-16)                           |                                         | 1354 (491-2933)      |                           | 0 (0-0)                      | 6 (2-14)                          |
| 2001 | Indonesia                  | 11924 (8455-12426)        |                                | 56 (40-59)                        |                                        | 1434 (625-3098)            |                                 | 7 (2-15)                           |                                         | 1277 (467-2758)      |                           | 0 (0-0)                      | 6 (2-13)                          |
| 2002 | Indonesia                  | 11400 (8084-11881)        |                                | 54 (38-56)                        |                                        | 1365 (601-2925)            |                                 | 6 (2-14)                           |                                         | 1209 (446-2604)      |                           | 0 (0-0)                      | 6 (2-12)                          |
| 2003 | Indonesia                  | 10833 (7682-11289)        |                                | 50 (36-53)                        |                                        | 1275 (470-2741)            |                                 | 6 (2-13)                           |                                         | 1135 (418-2440)      |                           | 0 (0-0)                      | 5 (2-11)                          |
| 2004 | Indonesia                  | 13236 (9386-13794)        |                                | 61 (43-64)                        |                                        | 1541 (577-3296)            |                                 | 7 (3-15)                           |                                         | 1372 (513-2934)      |                           | 0 (0-0)                      | 6 (2-14)                          |
| 2005 | Indonesia                  | 9752 (6915-10163)         |                                | 45 (32-47)                        |                                        | 1124 (427-2389)            |                                 | 5 (2-11)                           |                                         | 1001 (380-2127)      |                           | 0 (0-0)                      | 5 (2-10)                          |
| 2006 | Indonesia                  | 9263 (6568-9653)          |                                | 42 (30-44)                        |                                        | 1058 (408-2232)            |                                 | 5 (2-10)                           |                                         | 942 (363-1987)       |                           | 0 (0-0)                      | 4 (2-9)                           |
| 2007 | Indonesia                  | 8736 (6195-9104)          |                                | 40 (28-41)                        |                                        | 988 (386-2069)             |                                 | 4 (2-9)                            |                                         | 880 (344-1842)       |                           | 0 (0-0)                      | 4 (2-8)                           |
| 2008 | Indonesia                  | 8213 (5823-8559)          |                                | 37 (26-39)                        |                                        | 921 (369-1908)             |                                 | 4 (2-9)                            |                                         | 820 (328-1699)       |                           | 0 (0-0)                      | 4 (1-8)                           |
| 2009 | Indonesia                  | 7836 (5556-8166)          |                                | 35 (25-36)                        |                                        | 872 (357-1787)             |                                 | 4 (2-8)                            |                                         | 776 (318-1591)       |                           | 0 (0-0)                      | 3 (1-7)                           |
| 2010 | Indonesia                  | 7564 (5363-7883)          |                                | 33 (24-35)                        |                                        | 837 (351-1695)             |                                 | 4 (2-7)                            |                                         | 745 (313-1509)       |                           | 0 (0-0)                      | 3 (1-7)                           |
| 2011 | Indonesia                  | 7434 (5272-7748)          |                                | 33 (23-34)                        |                                        | 820 (353-1639)             |                                 | 4 (2-7)                            |                                         | 730 (314-1459)       |                           | 0 (0-0)                      | 3 (1-6)                           |
| 2012 | Indonesia                  | 7402 (5249-7714)          |                                | 32 (23-33)                        |                                        | 815 (359-1609)             |                                 | 4 (2-7)                            |                                         | 726 (320-1432)       |                           | 0 (0-0)                      | 3 (1-6)                           |
| 2013 | Indonesia                  | 7472 (5299-7787)          |                                | 32 (22-33)                        |                                        | 823 (289-1942)             |                                 | 3 (1-8)                            |                                         | 732 (257-1729)       |                           | 0 (0-0)                      | 3 (1-7)                           |
| 2014 | Indonesia                  | 7392 (5242-7704)          |                                | 31 (22-32)                        |                                        | 814 (287-1911)             |                                 | 3 (1-8)                            |                                         | 725 (256-1701)       |                           | 0 (0-0)                      | 3 (1-7)                           |
| 2015 | Indonesia                  | 7221 (5120-7525)          | 159 (113-166)                  | 30 (21-31)                        | 1 (0-1)                                | 798 (283-1858)             | 18 (6-41)                       | 3 (1-8)                            | 0 (0-0)                                 | 708 (252-1655)       | 16 (6-36)                 | 0 (0-0)                      | 3 (1-7)                           |
| 2000 | Iran (Islamic Republic of) | 1943 (1378-2025)          |                                | 31 (22-32)                        |                                        | 225 (123-374)              |                                 | 4 (2-6)                            |                                         | 200 (109-333)        |                           | 0 (0-0)                      | 3 (2-5)                           |
| 2001 | Iran (Islamic Republic of) | 1750 (1241-1824)          |                                | 29 (21-30)                        |                                        | 200 (110-336)              |                                 | 3 (2-6)                            |                                         | 178 (98-299)         |                           | 0 (0-0)                      | 3 (2-5)                           |
| 2002 | Iran (Islamic Republic of) | 1584 (1123-1651)          |                                | 27 (19-28)                        |                                        | 179 (95-303)               |                                 | 3 (2-5)                            |                                         | 159 (85-270)         |                           | 0 (0-0)                      | 3 (1-5)                           |
| 2003 | Iran (Islamic Republic of) | 1414 (1003-1474)          |                                | 25 (18-26)                        |                                        | 157 (75-322)               |                                 | 3 (1-6)                            |                                         | 140 (67-287)         |                           | 0 (0-0)                      | 2 (1-5)                           |
| 2004 | Iran (Islamic Republic of) | 1294 (919-1348)           |                                | 24 (17-25)                        |                                        | 141 (64-283)               |                                 | 3 (1-5)                            |                                         | 125 (57-261)         |                           | 0 (0-0)                      | 2 (1-5)                           |
| 2005 | Iran (Islamic Republic of) | 1186 (841-1236)           |                                | 22 (16-23)                        |                                        | 126 (64-268)               |                                 | 2 (1-5)                            |                                         | 112 (48-238)         |                           | 0 (0-0)                      | 2 (1-4)                           |
| 2006 | Iran (Islamic Republic of) | 1122 (795-1169)           |                                | 20 (14-21)                        |                                        | 116 (48-253)               |                                 | 2 (1-5)                            |                                         | 104 (42-225)         |                           | 0 (0-0)                      | 2 (1-4)                           |
| 2007 | Iran (Islamic Republic of) | 1070 (759-1115)           |                                | 19 (13-19)                        |                                        | 109 (43-241)               |                                 | 2 (1-4)                            |                                         | 97 (38-214)          |                           | 0 (0-0)                      | 2 (1-4)                           |
| 2008 | Iran (Islamic Republic of) | 1029 (730-1073)           |                                | 17 (12-18)                        |                                        | 102 (39-231)               |                                 | 2 (1-4)                            |                                         | 91 (34-206)          |                           | 0 (0-0)                      | 2 (1-3)                           |
| 2009 | Iran (Islamic Republic of) | 995 (705-1037)            |                                | 16 (12-17)                        |                                        | 97 (35-223)                |                                 | 2 (1-4)                            |                                         | 87 (31-199)          |                           | 0 (0-0)                      | 1 (1-3)                           |
| 2010 | Iran (Islamic Republic of) | 978 (694-1020)            |                                | 16 (11-16)                        |                                        | 95 (33-220)                |                                 | 2 (1-3)                            |                                         | 84 (29-196)          |                           | 0 (0-0)                      | 1 (0-3)                           |
| 2011 | Iran (Islamic Republic of) | 944 (669-984)             |                                | 15 (10-15)                        |                                        | 91 (32-211)                |                                 | 1 (0-3)                            |                                         | 81 (28-188)          |                           | 0 (0-0)                      | 1 (0-3)                           |
| 2012 | Iran (Islamic Republic of) | 912 (646-950)             |                                | 14 (10-14)                        |                                        | 87 (31-203)                |                                 | 1 (0-3)                            |                                         | 78 (27-181)          |                           | 0 (0-0)                      | 1 (0-3)                           |
| 2013 | Iran (Islamic Republic of) | 885 (628-922)             |                                | 13 (9-14)                         |                                        | 85 (30-198)                |                                 | 1 (0-3)                            |                                         | 76 (27-176)          |                           | 0 (0-0)                      | 1 (0-3)                           |
| 2014 | Iran (Islamic Republic of) | 839 (595-875)             |                                | 12 (9-13)                         |                                        | 81 (29-187)                |                                 | 1 (0-3)                            |                                         | 72 (26-167)          |                           | 0 (0-0)                      | 1 (0-2)                           |
| 2015 | Iran (Islamic Republic of) | 790 (560-824)             | 2 (1-2)                        | 12 (8-12)                         | 0 (0-0)                                | 76 (28-176)                | 0 (0-0)                         | 1 (0-3)                            | 0 (0-0)                                 | 68 (25-157)          | 0 (0-0)                   | 0 (0-0)                      | 1 (0-2)                           |
| 2000 | Iraq                       | 1648 (1169-1717)          |                                | 44 (31-45)                        |                                        | 170 (75-331)               |                                 | 4 (2-9)                            |                                         | 151 (67-295)         |                           | 0 (0-0)                      | 4 (2-8)                           |
| 2001 | Iraq                       | 1638 (1161-1707)          |                                | 42 (30-44)                        |                                        | 167 (75-329)               |                                 | 4 (2-8)                            |                                         | 151 (68-293)         |                           | 0 (0-0)                      | 4 (2-8)                           |
| 2002 | Iraq                       | 1622 (1150-1691)          |                                | 41 (29-43)                        |                                        | 170 (78-328)               |                                 | 4 (2-8)                            |                                         | 151 (69-292)         |                           | 0 (0-0)                      | 4 (2-7)                           |
| 2003 | Iraq                       | 1610 (1142-1678)          |                                | 40 (28-42)                        |                                        | 171 (79-327)               |                                 | 4 (2-8)                            |                                         | 152 (71-292)         |                           | 0 (0-0)                      | 4 (2-7)                           |
| 2004 | Iraq                       | 1601 (1136-1669)          |                                | 39 (28-41)                        |                                        | 170 (80-322)               |                                 | 4 (2-8)                            |                                         | 151 (71-287)         |                           | 0 (0-0)                      | 4 (2-7)                           |
| 2005 | Iraq                       | 1604 (1137-1672)          |                                | 38 (27-40)                        |                                        | 168 (81-318)               |                                 | 4 (2-8)                            |                                         | 150 (72-283)         |                           | 0 (0-0)                      | 4 (2-7)                           |
| 2006 | Iraq                       | 1605 (1138-1672)          |                                | 38 (27-39)                        |                                        | 166 (81-313)               |                                 | 4 (2-7)                            |                                         | 148 (72-278)         |                           | 0 (0-0)                      | 3 (2-7)                           |
| 2007 | Iraq                       | 1628 (1155-1697)          |                                | 37 (26-39)                        |                                        | 166 (79-315)               |                                 | 4 (2-7)                            |                                         | 148 (70-281)         |                           | 0 (0-0)                      | 3 (2-6)                           |
| 2008 | Iraq                       | 1662 (1178-1732)          |                                | 37 (26-38)                        |                                        | 168 (78-322)               |                                 | 4 (2-7)                            |                                         | 149 (69-286)         |                           | 0 (0-0)                      | 3 (2-6)                           |
| 2009 | Iraq                       | 1692 (1200-1763)          |                                | 36 (26-38)                        |                                        | 168 (76-327)               |                                 | 4 (2-7)                            |                                         | 150 (68-291)         |                           | 0 (0-0)                      | 3 (1-6)                           |
| 2010 | Iraq                       | 1707 (1211-1779)          |                                | 35 (25-37)                        |                                        | 167 (74-327)               |                                 | 3 (2-7)                            |                                         | 148 (66-291)         |                           | 0 (0-0)                      | 3 (1-6)                           |
| 2011 | Iraq                       | 1697 (1203-1769)          |                                | 34 (24-35)                        |                                        | 162 (71-322)               |                                 | 3 (1-6)                            |                                         | 144 (63-287)         |                           | 0 (0-0)                      | 3 (1-6)                           |
| 2012 | Iraq                       | 1705 (1209-1776)          |                                | 33 (23-34)                        |                                        | 159 (68-320)               |                                 | 3 (1-6)                            |                                         | 142 (61-285)         |                           | 0 (0-0)                      | 3 (1-5)                           |
| 2013 | Iraq                       | 1708 (1211-1781)          |                                | 32 (23-33)                        |                                        | 157 (66-319)               |                                 | 3 (1-6)                            |                                         | 140 (59-284)         |                           | 0 (0-0)                      | 3 (1-5)                           |
| 2014 | Iraq                       | 1672 (1186-1743)          |                                | 30 (22-32)                        |                                        | 152 (62-311)               |                                 | 3 (1-6)                            |                                         | 136 (56-277)         |                           | 0 (0-0)                      | 2 (1-5)                           |
| 2015 | Iraq                       | 1669 (1183-1739)          | 0 (0-0)                        | 30 (21-31)                        | 0 (0-0)                                | 151 (60-310)               | 0 (0-0)                         | 3 (1-6)                            | 0 (0-0)                                 | 134 (54-276)         | 0 (0-0)                   | 0 (0-0)                      | 2 (1-5)                           |
| 2000 | Ireland                    | 5 (3-5)                   |                                | 2 (1-2)                           |                                        | 8 (3-14)                   |                                 | 3 (1-5)                            |                                         | 7 (3-12)             |                           | 0 (0-0)                      | 3 (1-5)                           |
| 2001 | Ireland                    | 6 (4-7)                   |                                | 2 (2-2)                           |                                        | 4 (2-8)                    |                                 | 2 (1-3)                            |                                         | 4 (2-7)              |                           | 0 (0-0)                      | 1 (1-3)                           |
| 2002 | Ireland                    | 1 (1-1)                   |                                | 0 (0-1)                           |                                        | 5 (2-9)                    |                                 | 2 (1-3)                            |                                         | 4 (2-8)              |                           | 0 (0-0)                      | 2 (1-3)                           |
| 2003 | Ireland                    | 5 (4-6)                   |                                | 2 (1-2)                           |                                        | 5 (2-8)                    |                                 | 2 (1-3)                            |                                         | 4 (2-8)              |                           | 0 (0-0)                      | 1 (1-3)                           |
| 2004 | Ireland                    | 2 (2-2)                   |                                | 1 (1-1)                           |                                        | 5 (2-8)                    |                                 | 2 (1-3)                            |                                         | 4 (2-8)              |                           | 0 (0-0)                      | 1 (1-3)                           |
| 2005 | Ireland                    | 5 (3-5)                   |                                | 2 (1-2)                           |                                        | 5 (2-10)                   |                                 | 2 (1-3)                            |                                         | 5 (2-9)              |                           | 0 (0-0)                      | 2 (1-3)                           |
| 2006 | Ireland                    | 4 (3-4)                   |                                | 1 (1-1)                           |                                        | 2 (1-4)                    |                                 | 2 (0-1)                            |                                         | 2 (1-3)              |                           | 0 (0-0)                      | 1 (0-1)                           |
| 2007 | Ireland                    | 0 (0-0)                   |                                | 0 (0-0)                           |                                        | 4 (2-7)                    |                                 | 1 (1-2)                            |                                         | 4 (2-6)              |                           | 0 (0-0)                      | 1 (0-2)                           |
| 2008 | Ireland                    | 1 (1-1)                   |                                | 0 (0-0)                           |                                        | 4 (2-7)                    |                                 | 1 (0-2)                            |                                         | 3 (1-6)              |                           | 0 (0-0)                      | 1 (0-2)                           |
| 2009 | Ireland                    | 1 (1-1)                   |                                | 0 (0-0)                           |                                        | 2 (1-4)                    |                                 | 1 (0-1)                            |                                         | 2 (1-4)              |                           | 0 (0-0)                      | 1 (0-1)                           |
| 2010 | Ireland                    | 4 (3-4)                   |                                | 1 (1-1)                           |                                        | 2 (1-3)                    |                                 | 0 (0-1)                            |                                         | 1 (1-3)              |                           | 0 (0-0)                      | 0 (0-1)                           |
| 2011 | Ireland                    | 1 (1-1)                   |                                | 0 (0-0)                           |                                        | 1 (1-2)                    |                                 | 0 (0-1)                            |                                         | 1 (1-2)              |                           | 0 (0-0)                      | 0 (0-1)                           |
| 2012 | Ireland                    | 1 (1-1)                   |                                | 0 (0-0)                           |                                        | 1 (0-2)                    |                                 | 0 (0-1)                            |                                         | 1 (0-2)              |                           | 0 (0-0)                      | 0 (0-0)                           |
| 2013 | Ireland                    | 1 (1-1)                   |                                | 0 (0-0)                           |                                        | 1 (0-2)                    |                                 | 0 (0-0)                            |                                         | 1 (0-1)              |                           | 0 (0-0)                      | 0 (0-0)                           |
| 2014 | Ireland                    | 0 (0-1)                   |                                | 0 (0-0)                           |                                        | 1 (0-1)                    |                                 | 0 (0-0)                            |                                         | 0 (0-1)              |                           | 0 (0-0)                      | 0 (0-0)                           |
| 2015 | Ireland                    | 0 (0-0)                   |                                |                                   |                                        |                            |                                 |                                    |                                         |                      |                           |                              |                                   |

| Year | Country    | Spn pneumonia deaths (UR) | Spn pneumonia deaths, HIV (UR) | Spn pneumonia mortality rate (UR) | Spn pneumonia mortality rate, HIV (UR) | Spn meningitis deaths (UR) | Spn meningitis deaths, HIV (UR) | Spn meningitis mortality rate (UR) | Spn meningitis mortality rate, HIV (UR) | Spn NPNM deaths (UR) | Spn NPNM deaths, HIV (UR) | Spn NPNM mortality rate (UR) | Spn NPNM mortality rate, HIV (UR) |
|------|------------|---------------------------|--------------------------------|-----------------------------------|----------------------------------------|----------------------------|---------------------------------|------------------------------------|-----------------------------------------|----------------------|---------------------------|------------------------------|-----------------------------------|
| 2007 | Israel     | 5 (3-5)                   |                                | 1 (0-1)                           |                                        | 3 (2-5)                    |                                 | 0 (0-1)                            |                                         | 3 (2-4)              |                           | 0 (0-1)                      |                                   |
| 2008 | Israel     | 8 (6-9)                   |                                | 1 (1-1)                           |                                        | 6 (4-9)                    |                                 | 1 (1-1)                            |                                         | 6 (3-8)              |                           | 1 (0-1)                      |                                   |
| 2009 | Israel     | 5 (4-6)                   |                                | 1 (1-1)                           |                                        | 5 (3-7)                    |                                 | 1 (0-1)                            |                                         | 5 (3-6)              |                           | 1 (0-1)                      |                                   |
| 2010 | Israel     | 4 (3-4)                   |                                | 1 (0-1)                           |                                        | 5 (3-7)                    |                                 | 1 (0-1)                            |                                         | 4 (3-6)              |                           | 1 (0-1)                      |                                   |
| 2011 | Israel     | 3 (2-3)                   |                                | 0 (0-0)                           |                                        | 4 (2-6)                    |                                 | 1 (0-1)                            |                                         | 4 (2-5)              |                           | 0 (0-1)                      |                                   |
| 2012 | Israel     | 4 (3-4)                   |                                | 1 (0-1)                           |                                        | 4 (3-4)                    |                                 | 1 (0-1)                            |                                         | 2 (1-3)              |                           | 0 (0-0)                      |                                   |
| 2013 | Israel     | 3 (2-3)                   |                                | 0 (0-0)                           |                                        | 3 (2-4)                    |                                 | 0 (0-1)                            |                                         | 3 (2-4)              |                           | 0 (0-0)                      |                                   |
| 2014 | Israel     | 3 (2-3)                   |                                | 0 (0-0)                           |                                        | 3 (2-4)                    |                                 | 0 (0-1)                            |                                         | 3 (2-4)              |                           | 0 (0-0)                      |                                   |
| 2015 | Israel     | 2 (2-2)                   | 0 (0-0)                        | 0 (0-0)                           | 0 (0-0)                                | 2 (1-3)                    | 0 (0-0)                         | 0 (0-0)                            | 0 (0-0)                                 | 2 (1-3)              | 0 (0-0)                   | 0 (0-0)                      | 0 (0-0)                           |
| 2000 | Italy      | 17 (12-17)                |                                | 1 (0-1)                           |                                        | 5 (2-9)                    |                                 | 0 (0-0)                            |                                         | 5 (2-8)              |                           | 0 (0-0)                      |                                   |
| 2001 | Italy      | 18 (13-19)                |                                | 1 (1-1)                           |                                        | 6 (3-11)                   |                                 | 0 (0-0)                            |                                         | 6 (3-10)             |                           | 0 (0-0)                      |                                   |
| 2002 | Italy      | 24 (17-25)                |                                | 1 (1-1)                           |                                        | 6 (3-12)                   |                                 | 0 (0-0)                            |                                         | 6 (3-10)             |                           | 0 (0-0)                      |                                   |
| 2003 | Italy      | 11 (8-11)                 |                                | 0 (0-0)                           |                                        | 10 (5-19)                  |                                 | 0 (0-1)                            |                                         | 9 (4-17)             |                           | 0 (0-1)                      |                                   |
| 2004 | Italy      | 13 (10-14)                |                                | 1 (0-1)                           |                                        | 7 (3-13)                   |                                 | 0 (0-0)                            |                                         | 6 (3-11)             |                           | 0 (0-0)                      |                                   |
| 2005 | Italy      | 14 (10-14)                |                                | 1 (0-1)                           |                                        | 7 (3-13)                   |                                 | 0 (0-0)                            |                                         | 6 (3-11)             |                           | 0 (0-0)                      |                                   |
| 2006 | Italy      | 12 (8-12)                 |                                | 0 (0-0)                           |                                        | 9 (4-17)                   |                                 | 0 (0-1)                            |                                         | 8 (4-15)             |                           | 0 (0-1)                      |                                   |
| 2007 | Italy      | 10 (7-10)                 |                                | 0 (0-0)                           |                                        | 8 (3-14)                   |                                 | 0 (0-1)                            |                                         | 7 (3-12)             |                           | 0 (0-1)                      |                                   |
| 2008 | Italy      | 11 (8-11)                 |                                | 0 (0-0)                           |                                        | 4 (2-8)                    |                                 | 0 (0-0)                            |                                         | 4 (2-7)              |                           | 0 (0-0)                      |                                   |
| 2009 | Italy      | 6 (4-6)                   |                                | 0 (0-0)                           |                                        | 6 (3-10)                   |                                 | 0 (0-0)                            |                                         | 5 (2-9)              |                           | 0 (0-0)                      |                                   |
| 2010 | Italy      | 7 (5-7)                   |                                | 0 (0-0)                           |                                        | 4 (2-8)                    |                                 | 0 (0-0)                            |                                         | 4 (2-7)              |                           | 0 (0-0)                      |                                   |
| 2011 | Italy      | 6 (6-9)                   |                                | 0 (0-0)                           |                                        | 2 (1-4)                    |                                 | 0 (0-0)                            |                                         | 2 (1-4)              |                           | 0 (0-0)                      |                                   |
| 2012 | Italy      | 4 (3-4)                   |                                | 0 (0-0)                           |                                        | 1 (1-3)                    |                                 | 0 (0-0)                            |                                         | 1 (1-2)              |                           | 0 (0-0)                      |                                   |
| 2013 | Italy      | 3 (2-3)                   |                                | 0 (0-0)                           |                                        | 1 (1-2)                    |                                 | 0 (0-0)                            |                                         | 1 (0-2)              |                           | 0 (0-0)                      |                                   |
| 2014 | Italy      | 2 (2-3)                   |                                | 0 (0-0)                           |                                        | 1 (0-2)                    |                                 | 0 (0-0)                            |                                         | 1 (0-2)              |                           | 0 (0-0)                      |                                   |
| 2015 | Italy      | 2 (2-2)                   | 0 (0-0)                        | 0 (0-0)                           | 0 (0-0)                                | 1 (0-2)                    | 0 (0-0)                         | 0 (0-0)                            | 0 (0-0)                                 | 1 (0-2)              | 0 (0-0)                   | 0 (0-0)                      | 0 (0-0)                           |
| 2000 | Jamaica    | 13 (8-13)                 |                                | 0 (0-0)                           |                                        | 5 (3-5)                    |                                 | 0 (0-1)                            |                                         | 1 (0-3)              |                           | 0 (0-1)                      |                                   |
| 2001 | Jamaica    | 12 (8-12)                 |                                | 4 (3-4)                           |                                        | 1 (0-4)                    |                                 | 0 (0-1)                            |                                         | 1 (0-3)              |                           | 0 (0-1)                      |                                   |
| 2002 | Jamaica    | 11 (8-12)                 |                                | 4 (3-4)                           |                                        | 1 (0-3)                    |                                 | 0 (0-1)                            |                                         | 1 (0-3)              |                           | 0 (0-1)                      |                                   |
| 2003 | Jamaica    | 11 (8-11)                 |                                | 4 (3-4)                           |                                        | 1 (0-4)                    |                                 | 1 (0-2)                            |                                         | 1 (0-4)              |                           | 0 (0-2)                      |                                   |
| 2004 | Jamaica    | 12 (8-12)                 |                                | 5 (3-5)                           |                                        | 2 (0-6)                    |                                 | 1 (0-2)                            |                                         | 2 (0-6)              |                           | 1 (0-2)                      |                                   |
| 2005 | Jamaica    | 13 (9-14)                 |                                | 5 (4-5)                           |                                        | 2 (1-7)                    |                                 | 1 (0-3)                            |                                         | 2 (1-6)              |                           | 1 (0-2)                      |                                   |
| 2006 | Jamaica    | 14 (10-14)                |                                | 6 (4-6)                           |                                        | 3 (1-7)                    |                                 | 1 (0-3)                            |                                         | 2 (1-6)              |                           | 1 (0-3)                      |                                   |
| 2007 | Jamaica    | 15 (10-15)                |                                | 6 (5-7)                           |                                        | 3 (1-7)                    |                                 | 1 (0-3)                            |                                         | 2 (1-7)              |                           | 1 (0-3)                      |                                   |
| 2008 | Jamaica    | 16 (12-17)                |                                | 7 (5-7)                           |                                        | 3 (1-8)                    |                                 | 1 (0-4)                            |                                         | 3 (1-7)              |                           | 1 (0-3)                      |                                   |
| 2009 | Jamaica    | 15 (11-16)                |                                | 7 (5-7)                           |                                        | 3 (1-8)                    |                                 | 1 (0-3)                            |                                         | 2 (1-7)              |                           | 1 (0-3)                      |                                   |
| 2010 | Jamaica    | 14 (10-15)                |                                | 6 (5-7)                           |                                        | 3 (1-7)                    |                                 | 1 (0-3)                            |                                         | 2 (1-6)              |                           | 1 (0-3)                      |                                   |
| 2011 | Jamaica    | 13 (9-14)                 |                                | 6 (4-6)                           |                                        | 2 (1-6)                    |                                 | 1 (0-3)                            |                                         | 2 (1-6)              |                           | 1 (0-3)                      |                                   |
| 2012 | Jamaica    | 13 (9-14)                 |                                | 6 (4-6)                           |                                        | 2 (1-6)                    |                                 | 1 (0-3)                            |                                         | 2 (1-5)              |                           | 1 (0-3)                      |                                   |
| 2013 | Jamaica    | 6 (4-6)                   |                                | 12 (8-12)                         |                                        | 2 (1-5)                    |                                 | 1 (0-3)                            |                                         | 2 (1-5)              |                           | 1 (0-2)                      |                                   |
| 2014 | Jamaica    | 11 (8-11)                 |                                | 5 (4-6)                           |                                        | 2 (1-5)                    |                                 | 1 (0-2)                            |                                         | 2 (1-4)              |                           | 1 (0-2)                      |                                   |
| 2015 | Jamaica    | 11 (7-11)                 | 0 (0-0)                        | 5 (4-5)                           | 0 (0-0)                                | 2 (1-5)                    | 0 (0-0)                         | 1 (0-2)                            | 0 (0-0)                                 | 2 (1-4)              | 0 (0-0)                   | 1 (0-2)                      | 0 (0-0)                           |
| 2000 | Japan      | 113 (80-118)              |                                | 2 (1-2)                           |                                        | 28 (17-39)                 |                                 | 0 (0-1)                            |                                         | 26 (15-35)           |                           | 0 (0-1)                      |                                   |
| 2001 | Japan      | 89 (63-93)                |                                | 2 (1-2)                           |                                        | 26 (15-35)                 |                                 | 0 (0-1)                            |                                         | 23 (14-31)           |                           | 0 (0-1)                      |                                   |
| 2002 | Japan      | 98 (69-102)               |                                | 2 (1-2)                           |                                        | 20 (12-27)                 |                                 | 0 (0-0)                            |                                         | 17 (10-24)           |                           | 0 (0-0)                      |                                   |
| 2003 | Japan      | 99 (70-103)               |                                | 2 (1-2)                           |                                        | 23 (14-32)                 |                                 | 0 (0-1)                            |                                         | 21 (13-29)           |                           | 0 (0-1)                      |                                   |
| 2004 | Japan      | 80 (57-84)                |                                | 1 (1-1)                           |                                        | 18 (11-24)                 |                                 | 0 (0-0)                            |                                         | 16 (9-22)            |                           | 0 (0-0)                      |                                   |
| 2005 | Japan      | 88 (63-92)                |                                | 2 (1-2)                           |                                        | 20 (12-27)                 |                                 | 0 (0-0)                            |                                         | 17 (10-24)           |                           | 0 (0-0)                      |                                   |
| 2006 | Japan      | 76 (54-79)                |                                | 1 (1-1)                           |                                        | 15 (9-20)                  |                                 | 0 (0-0)                            |                                         | 13 (8-18)            |                           | 0 (0-0)                      |                                   |
| 2007 | Japan      | 80 (57-83)                |                                | 1 (1-2)                           |                                        | 19 (12-27)                 |                                 | 0 (0-0)                            |                                         | 17 (10-24)           |                           | 0 (0-0)                      |                                   |
| 2008 | Japan      | 83 (59-87)                |                                | 2 (1-2)                           |                                        | 11 (7-15)                  |                                 | 0 (0-0)                            |                                         | 10 (6-14)            |                           | 0 (0-0)                      |                                   |
| 2009 | Japan      | 63 (44-65)                |                                | 1 (1-1)                           |                                        | 15 (9-21)                  |                                 | 0 (0-0)                            |                                         | 13 (8-18)            |                           | 0 (0-0)                      |                                   |
| 2010 | Japan      | 71 (50-74)                |                                | 1 (1-1)                           |                                        | 20 (12-27)                 |                                 | 0 (0-1)                            |                                         | 18 (11-24)           |                           | 0 (0-0)                      |                                   |
| 2011 | Japan      | 69 (49-72)                |                                | 1 (1-1)                           |                                        | 9 (5-12)                   |                                 | 0 (0-0)                            |                                         | 8 (5-11)             |                           | 0 (0-0)                      |                                   |
| 2012 | Japan      | 65 (46-68)                |                                | 1 (1-1)                           |                                        | 7 (4-9)                    |                                 | 0 (0-0)                            |                                         | 6 (4-8)              |                           | 0 (0-0)                      |                                   |
| 2013 | Japan      | 60 (42-62)                |                                | 1 (1-1)                           |                                        | 7 (4-10)                   |                                 | 0 (0-0)                            |                                         | 7 (4-9)              |                           | 0 (0-0)                      |                                   |
| 2014 | Japan      | 57 (41-60)                |                                | 1 (1-1)                           |                                        | 7 (4-9)                    |                                 | 0 (0-0)                            |                                         | 6 (4-8)              |                           | 0 (0-0)                      |                                   |
| 2015 | Japan      | 46 (32-47)                | 0 (0-0)                        | 1 (1-1)                           | 0 (0-0)                                | 6 (3-8)                    | 0 (0-0)                         | 0 (0-0)                            | 0 (0-0)                                 | 5 (3-7)              | 0 (0-0)                   | 0 (0-0)                      | 0 (0-0)                           |
| 2000 | Jordan     | 126 (89-131)              |                                | 18 (13-19)                        |                                        | 9 (3-21)                   |                                 | 1 (1-3)                            |                                         | 8 (3-18)             |                           | 1 (0-3)                      |                                   |
| 2001 | Jordan     | 125 (89-131)              |                                | 18 (13-19)                        |                                        | 14 (5-32)                  |                                 | 2 (1-5)                            |                                         | 12 (5-28)            |                           | 2 (1-4)                      |                                   |
| 2002 | Jordan     | 127 (80-132)              |                                | 18 (13-19)                        |                                        | 16 (6-38)                  |                                 | 2 (1-5)                            |                                         | 15 (5-34)            |                           | 2 (1-5)                      |                                   |
| 2003 | Jordan     | 121 (86-127)              |                                | 18 (12-18)                        |                                        | 16 (6-37)                  |                                 | 2 (1-5)                            |                                         | 14 (5-32)            |                           | 2 (1-5)                      |                                   |
| 2004 | Jordan     | 116 (82-121)              |                                | 17 (12-17)                        |                                        | 15 (5-35)                  |                                 | 2 (1-5)                            |                                         | 13 (5-31)            |                           | 2 (1-4)                      |                                   |
| 2005 | Jordan     | 114 (81-119)              |                                | 16 (11-17)                        |                                        | 15 (5-35)                  |                                 | 2 (1-5)                            |                                         | 13 (5-31)            |                           | 2 (1-4)                      |                                   |
| 2006 | Jordan     | 113 (80-118)              |                                | 15 (11-16)                        |                                        | 15 (5-35)                  |                                 | 2 (1-5)                            |                                         | 13 (5-31)            |                           | 2 (1-4)                      |                                   |
| 2007 | Jordan     | 113 (80-118)              |                                | 15 (10-15)                        |                                        | 15 (5-35)                  |                                 | 2 (1-5)                            |                                         | 13 (5-31)            |                           | 2 (1-4)                      |                                   |
| 2008 | Jordan     | 112 (80-117)              |                                | 14 (10-15)                        |                                        | 15 (5-34)                  |                                 | 2 (1-4)                            |                                         | 13 (5-31)            |                           | 2 (1-4)                      |                                   |
| 2009 | Jordan     | 113 (80-118)              |                                | 14 (10-14)                        |                                        | 15 (5-34)                  |                                 | 2 (1-4)                            |                                         | 13 (5-30)            |                           | 2 (1-4)                      |                                   |
| 2010 | Jordan     | 112 (79-116)              |                                | 13 (9-14)                         |                                        | 14 (5-33)                  |                                 | 2 (1-4)                            |                                         | 13 (4-29)            |                           | 1 (1-3)                      |                                   |
| 2011 | Jordan     | 112 (79-117)              |                                | 13 (9-13)                         |                                        | 14 (5-32)                  |                                 | 2 (1-4)                            |                                         | 12 (4-29)            |                           | 1 (1-3)                      |                                   |
| 2012 | Jordan     | 112 (79-116)              |                                | 12 (9-13)                         |                                        | 14 (5-32)                  |                                 | 2 (1-3)                            |                                         | 12 (4-28)            |                           | 1 (0-3)                      |                                   |
| 2013 | Jordan     | 110 (78-115)              |                                | 12 (8-12)                         |                                        | 13 (5-31)                  |                                 | 1 (1-3)                            |                                         | 12 (4-27)            |                           | 1 (0-3)                      |                                   |
| 2014 | Jordan     | 108 (76-112)              |                                | 11 (8-12)                         |                                        | 13 (5-29)                  |                                 | 1 (0-3)                            |                                         | 11 (4-26)            |                           | 1 (0-3)                      |                                   |
| 2015 | Jordan     | 104 (74-108)              | 0 (0-0)                        | 11 (8-11)                         | 0 (0-0)                                | 12 (5-28)                  | 0 (0-0)                         | 1 (0-3)                            | 0 (0-0)                                 | 11 (4-25)            | 0 (0-0)                   | 1 (0-3)                      | 0 (0-0)                           |
| 2000 | Kazakhstan | 499 (354-520)             |                                | 45 (32-47)                        |                                        | 52 (20-108)                |                                 | 5 (2-10)                           |                                         | 46 (18-96)           |                           | 4 (2-9)                      |                                   |
| 2001 | Kazakhstan | 470 (333-490)             |                                | 44 (31-46)                        |                                        | 48 (19-99)                 |                                 | 4 (2-9)                            |                                         | 42 (17-88)           |                           | 4 (2-8)                      |                                   |
| 2002 | Kazakhstan | 461 (327-480)             |                                | 43 (30-45)                        |                                        | 46 (18-98)                 |                                 | 4 (2-9)                            |                                         | 41 (16-84)           |                           | 4 (2-8)                      |                                   |
| 2003 | Kazakhstan | 455 (323-474)             |                                | 41 (29-43)                        |                                        | 44 (18-91)                 |                                 | 4 (2-9)                            |                                         | 39 (16-81)           |                           | 4 (1-7)                      |                                   |
| 2004 | Kazakhstan | 450 (319-469)             |                                | 39 (27-40)                        |                                        | 43 (17-88)                 |                                 | 4 (1-8)                            |                                         | 38 (16-78)           |                           | 3 (1-7)                      |                                   |
| 2005 | Kazakhstan | 449 (318-468)             |                                | 37 (26-38)                        |                                        | 42 (17-86)                 |                                 | 3 (1-7)                            |                                         | 38 (15-77)           |                           | 3 (1-6)                      |                                   |
| 2006 | Kazakhstan | 444 (315-463)             |                                | 34 (24-36)                        |                                        | 42 (17-84)                 |                                 | 3 (1-6)                            |                                         | 37 (15-75)           |                           | 3 (1-6)                      |                                   |
| 2007 | Kazakhstan | 435 (308-453)             |                                | 32 (23-33)                        |                                        | 41 (14-97)                 |                                 | 3 (1-7)                            |                                         | 36 (12-86)           |                           | 3 (1-6)                      |                                   |
| 2008 | Kazakhstan | 424 (300-442)             |                                | 30 (21-31)                        |                                        | 40 (14-93)                 |                                 | 3 (1-6)                            |                                         | 35 (12-83)           |                           | 2 (1-6)                      |                                   |
| 2009 | Kazakhstan | 405 (287-422)             |                                | 27 (19-28)                        |                                        | 38 (14-87)                 |                                 | 3 (1-6)                            |                                         | 34 (13-78)           |                           | 2 (1-5)                      |                                   |
| 2010 | Kazakhstan | 388 (275-404)             |                                | 25 (17-26)                        |                                        | 37 (15-82)                 |                                 | 2 (1-5)                            |                                         | 33 (15-82)           |                           | 2 (1-5)                      |                                   |
| 2011 | Kazakhstan | 363 (257-378)             |                                | 22 (15-23)                        |                                        | 34 (14-76)                 |                                 | 2 (1-5)                            |                                         | 30 (12-68)           |                           | 2 (1-4)                      |                                   |
| 2012 | Kazakhstan | 285 (202-297)             |                                | 16 (11-17)                        |                                        | 26 (10-57)                 |                                 | 1 (1-3)                            |                                         | 23 (9-51)            |                           | 1 (1-3)                      |                                   |
| 2013 | Kazakhstan | 233 (165-243)             |                                | 13 (9-13)                         |                                        | 21 (9-46)                  |                                 | 1 (0-3)                            |                                         | 19 (8-41)            |                           | 1 (0-2)                      |                                   |
| 2014 | Kazakhstan | 200 (142-209)             |                                | 11 (8-11)                         |                                        | 18 (8-40)                  |                                 | 1 (0-2)                            |                                         | 16 (7-35)            |                           | 1 (0-2)                      |                                   |

Spn = *Streptococcus pneumoniae*; npnm = non-pneumonia, non-meningitis; HIV = deaths only in HIV-infected children; Uncertainty range provided in parentheses.

| Year | Country                          | Spn pneumonia deaths (UR) | Spn pneumonia deaths, HIV (UR) | Spn pneumonia mortality rate (UR) | Spn pneumonia mortality rate, HIV (UR) | Spn meningitis deaths (UR) | Spn meningitis deaths, HIV (UR) | Spn meningitis mortality rate (UR) | Spn meningitis mortality rate, HIV (UR) | Spn NPM deaths (UR) | Spn NPM deaths, HIV (UR) | Spn NPM mortality rate (UR) | Spn NPM mortality rate, HIV (UR) |
|------|----------------------------------|---------------------------|--------------------------------|-----------------------------------|----------------------------------------|----------------------------|---------------------------------|------------------------------------|-----------------------------------------|---------------------|--------------------------|-----------------------------|----------------------------------|
| 2015 | Kazakhstan                       | 163 (115-170)             |                                | 0 (0-0)                           | 8 (6-9)                                | 15 (6-32)                  |                                 | 0 (0-0)                            | 1 (0-2)                                 | 13 (8-28)           |                          | 0 (0-0)                     | 1 (0-1)                          |
| 2000 | Kenya                            | 6300 (4467-6566)          |                                | 126 (90-132)                      |                                        | 1013 (405-2151)            |                                 | 20 (8-43)                          |                                         | 318 (127-676)       |                          | 6 (2-13)                    |                                  |
| 2001 | Kenya                            | 6245 (4428-6508)          |                                | 121 (86-126)                      |                                        | 1004 (404-2127)            |                                 | 19 (8-41)                          |                                         | 316 (127-669)       |                          | 6 (2-13)                    |                                  |
| 2002 | Kenya                            | 6180 (4382-6440)          |                                | 116 (82-121)                      |                                        | 994 (402-2100)             |                                 | 19 (8-39)                          |                                         | 313 (127-660)       |                          | 6 (2-12)                    |                                  |
| 2003 | Kenya                            | 6061 (4296-6316)          |                                | 111 (78-115)                      |                                        | 973 (396-2047)             |                                 | 18 (7-37)                          |                                         | 306 (125-644)       |                          | 6 (2-12)                    |                                  |
| 2004 | Kenya                            | 5918 (4197-6169)          |                                | 105 (74-109)                      |                                        | 946 (390-1911)             |                                 | 17 (7-35)                          |                                         | 298 (123-623)       |                          | 5 (2-11)                    |                                  |
| 2005 | Kenya                            | 5595 (3967-5831)          |                                | 97 (68-101)                       |                                        | 891 (372-1855)             |                                 | 15 (6-32)                          |                                         | 280 (117-583)       |                          | 5 (2-10)                    |                                  |
| 2006 | Kenya                            | 5451 (3866-5681)          |                                | 91 (65-95)                        |                                        | 866 (366-1796)             |                                 | 14 (6-30)                          |                                         | 272 (115-565)       |                          | 5 (2-9)                     |                                  |
| 2007 | Kenya                            | 5393 (3824-5621)          |                                | 88 (62-92)                        |                                        | 855 (367-1768)             |                                 | 14 (6-29)                          |                                         | 269 (115-556)       |                          | 4 (2-9)                     |                                  |
| 2008 | Kenya                            | 5176 (3670-5394)          |                                | 82 (58-86)                        |                                        | 820 (305-1740)             |                                 | 13 (5-28)                          |                                         | 730 (271-1549)      |                          | 12 (4-25)                   |                                  |
| 2009 | Kenya                            | 4954 (3513-5163)          |                                | 77 (55-81)                        |                                        | 782 (291-1659)             |                                 | 12 (5-26)                          |                                         | 696 (259-1477)      |                          | 11 (4-23)                   |                                  |
| 2010 | Kenya                            | 4713 (3342-4911)          |                                | 72 (51-75)                        |                                        | 741 (282-1561)             |                                 | 11 (4-24)                          |                                         | 660 (251-1390)      |                          | 10 (4-21)                   |                                  |
| 2011 | Kenya                            | 3168 (2246-3302)          |                                | 48 (34-50)                        |                                        | 469 (183-911)              |                                 | 7 (3-15)                           |                                         | 418 (163-874)       |                          | 6 (2-13)                    |                                  |
| 2012 | Kenya                            | 2665 (1890-2777)          |                                | 39 (28-41)                        |                                        | 397 (158-821)              |                                 | 6 (2-12)                           |                                         | 353 (141-731)       |                          | 5 (2-11)                    |                                  |
| 2013 | Kenya                            | 2430 (1723-2532)          |                                | 35 (25-37)                        |                                        | 379 (155-778)              |                                 | 6 (2-11)                           |                                         | 338 (138-693)       |                          | 5 (2-10)                    |                                  |
| 2014 | Kenya                            | 2192 (1554-2284)          |                                | 32 (22-33)                        |                                        | 343 (144-698)              |                                 | 5 (2-10)                           |                                         | 306 (128-622)       |                          | 4 (2-9)                     |                                  |
| 2015 | Kenya                            | 1548 (1098-1613)          | 216 (153-226)                  | 22 (16-23)                        | 3 (2-3)                                | 234 (98-473)               | 33 (14-66)                      | 3 (1-7)                            | 0 (0-1)                                 | 208 (88-421)        | 29 (12-59)               | 3 (1-6)                     | 0 (0-1)                          |
| 2000 | Kiribati                         | 11 (8-11)                 |                                | 93 (66-97)                        |                                        | 1 (0-2)                    |                                 | 7 (3-19)                           |                                         | 1 (0-2)             |                          | 6 (2-17)                    |                                  |
| 2001 | Kiribati                         | 10 (7-11)                 |                                | 87 (62-91)                        |                                        | 1 (0-2)                    |                                 | 7 (2-18)                           |                                         | 1 (0-2)             |                          | 6 (2-16)                    |                                  |
| 2002 | Kiribati                         | 9 (7-10)                  |                                | 83 (59-86)                        |                                        | 1 (0-2)                    |                                 | 6 (2-17)                           |                                         | 1 (0-2)             |                          | 6 (2-15)                    |                                  |
| 2003 | Kiribati                         | 8 (6-9)                   |                                | 77 (55-80)                        |                                        | 1 (0-2)                    |                                 | 6 (2-15)                           |                                         | 1 (0-2)             |                          | 5 (2-14)                    |                                  |
| 2004 | Kiribati                         | 8 (6-8)                   |                                | 75 (53-78)                        |                                        | 1 (0-2)                    |                                 | 6 (2-15)                           |                                         | 1 (0-1)             |                          | 5 (2-13)                    |                                  |
| 2005 | Kiribati                         | 8 (6-9)                   |                                | 77 (55-81)                        |                                        | 1 (0-2)                    |                                 | 6 (2-16)                           |                                         | 1 (0-1)             |                          | 5 (2-14)                    |                                  |
| 2006 | Kiribati                         | 9 (6-9)                   |                                | 84 (59-87)                        |                                        | 1 (0-2)                    |                                 | 6 (2-17)                           |                                         | 1 (0-2)             |                          | 6 (2-15)                    |                                  |
| 2007 | Kiribati                         | 10 (7-10)                 |                                | 91 (65-95)                        |                                        | 1 (0-2)                    |                                 | 7 (2-18)                           |                                         | 1 (0-2)             |                          | 6 (2-16)                    |                                  |
| 2008 | Kiribati                         | 11 (8-12)                 |                                | 96 (68-100)                       |                                        | 1 (0-2)                    |                                 | 7 (3-19)                           |                                         | 1 (0-2)             |                          | 6 (2-17)                    |                                  |
| 2009 | Kiribati                         | 12 (9-13)                 |                                | 96 (68-100)                       |                                        | 1 (0-3)                    |                                 | 7 (3-20)                           |                                         | 1 (0-2)             |                          | 6 (2-17)                    |                                  |
| 2010 | Kiribati                         | 13 (9-14)                 |                                | 95 (67-99)                        |                                        | 1 (0-3)                    |                                 | 7 (3-19)                           |                                         | 1 (0-2)             |                          | 6 (2-17)                    |                                  |
| 2011 | Kiribati                         | 13 (9-14)                 |                                | 90 (64-94)                        |                                        | 1 (0-3)                    |                                 | 7 (3-18)                           |                                         | 1 (0-2)             |                          | 6 (2-16)                    |                                  |
| 2012 | Kiribati                         | 13 (9-13)                 |                                | 85 (60-88)                        |                                        | 1 (0-3)                    |                                 | 7 (2-17)                           |                                         | 1 (0-2)             |                          | 6 (2-15)                    |                                  |
| 2013 | Kiribati                         | 9 (6-9)                   |                                | 80 (42-82)                        |                                        | 1 (0-2)                    |                                 | 5 (2-13)                           |                                         | 1 (0-2)             |                          | 4 (2-12)                    |                                  |
| 2014 | Kiribati                         | 7 (5-7)                   |                                | 48 (34-50)                        |                                        | 1 (0-2)                    |                                 | 4 (2-11)                           |                                         | 1 (0-1)             |                          | 4 (1-10)                    |                                  |
| 2015 | Kiribati                         | 4 (3-4)                   | 0 (0-0)                        | 29 (21-30)                        | 0 (0-0)                                | 0 (0-1)                    | 0 (0-0)                         | 3 (1-7)                            | 0 (0-0)                                 | 0 (0-1)             | 0 (0-0)                  | 2 (1-6)                     | 0 (0-0)                          |
| 2000 | Kuwait                           | 13 (9-14)                 |                                | 6 (5-7)                           |                                        | 3 (2-4)                    |                                 | 1 (1-2)                            |                                         | 2 (1-3)             |                          | 1 (1-2)                     |                                  |
| 2001 | Kuwait                           | 12 (9-13)                 |                                | 6 (4-6)                           |                                        | 5 (3-7)                    |                                 | 3 (2-3)                            |                                         | 5 (3-6)             |                          | 2 (1-3)                     |                                  |
| 2002 | Kuwait                           | 12 (9-13)                 |                                | 6 (4-6)                           |                                        | 1 (1-1)                    |                                 | 0 (0-1)                            |                                         | 1 (1-1)             |                          | 0 (0-1)                     |                                  |
| 2003 | Kuwait                           | 10 (7-11)                 |                                | 4 (5-5)                           |                                        | 4 (3-6)                    |                                 | 2 (1-3)                            |                                         | 4 (2-5)             |                          | 2 (1-2)                     |                                  |
| 2004 | Kuwait                           | 9 (7-10)                  |                                | 4 (3-5)                           |                                        | 3 (2-4)                    |                                 | 1 (1-2)                            |                                         | 2 (1-3)             |                          | 1 (1-2)                     |                                  |
| 2005 | Kuwait                           | 9 (7-10)                  |                                | 4 (3-4)                           |                                        | 4 (3-4)                    |                                 | 2 (1-3)                            |                                         | 4 (2-5)             |                          | 2 (1-2)                     |                                  |
| 2006 | Kuwait                           | 8 (6-8)                   |                                | 4 (3-4)                           |                                        | 1 (1-1)                    |                                 | 0 (0-1)                            |                                         | 1 (0-1)             |                          | 0 (0-0)                     |                                  |
| 2007 | Kuwait                           | 14 (10-15)                |                                | 6 (4-6)                           |                                        | 2 (1-3)                    |                                 | 1 (0-1)                            |                                         | 2 (1-2)             |                          | 1 (0-1)                     |                                  |
| 2008 | Kuwait                           | 9 (6-9)                   |                                | 3 (2-4)                           |                                        | 0 (0-0)                    |                                 | 0 (0-0)                            |                                         | 0 (0-0)             |                          | 0 (0-0)                     |                                  |
| 2009 | Kuwait                           | 12 (9-13)                 |                                | 4 (3-5)                           |                                        | 3 (2-4)                    |                                 | 1 (1-1)                            |                                         | 2 (1-3)             |                          | 1 (1-1)                     |                                  |
| 2010 | Kuwait                           | 13 (9-13)                 |                                | 4 (3-4)                           |                                        | 2 (1-3)                    |                                 | 1 (0-1)                            |                                         | 2 (1-3)             |                          | 1 (0-1)                     |                                  |
| 2011 | Kuwait                           | 16 (11-17)                |                                | 5 (4-5)                           |                                        | 4 (3-6)                    |                                 | 1 (1-2)                            |                                         | 4 (2-5)             |                          | 1 (1-2)                     |                                  |
| 2012 | Kuwait                           | 11 (8-12)                 |                                | 3 (2-4)                           |                                        | 3 (2-4)                    |                                 | 1 (0-1)                            |                                         | 2 (1-3)             |                          | 1 (0-1)                     |                                  |
| 2013 | Kuwait                           | 10 (7-11)                 |                                | 3 (2-3)                           |                                        | 2 (1-3)                    |                                 | 1 (0-1)                            |                                         | 2 (1-3)             |                          | 1 (0-1)                     |                                  |
| 2014 | Kuwait                           | 10 (7-10)                 |                                | 3 (2-3)                           |                                        | 2 (1-3)                    |                                 | 1 (0-1)                            |                                         | 2 (1-3)             |                          | 1 (0-1)                     |                                  |
| 2015 | Kuwait                           | 9 (6-10)                  | 0 (0-0)                        | 3 (2-3)                           | 0 (0-0)                                | 2 (1-3)                    | 0 (0-0)                         | 1 (0-1)                            | 0 (0-0)                                 | 2 (1-3)             | 0 (0-0)                  | 1 (0-1)                     | 0 (0-0)                          |
| 2000 | Kyrgyzstan                       | 291 (207-304)             |                                | 54 (38-57)                        |                                        | 49 (19-103)                |                                 | 9 (3-19)                           |                                         | 43 (16-92)          |                          | 8 (3-17)                    |                                  |
| 2001 | Kyrgyzstan                       | 267 (160-279)             |                                | 51 (36-53)                        |                                        | 44 (17-94)                 |                                 | 8 (3-18)                           |                                         | 39 (15-84)          |                          | 8 (3-16)                    |                                  |
| 2002 | Kyrgyzstan                       | 246 (174-256)             |                                | 48 (34-50)                        |                                        | 40 (15-86)                 |                                 | 8 (3-17)                           |                                         | 36 (14-76)          |                          | 7 (3-15)                    |                                  |
| 2003 | Kyrgyzstan                       | 225 (160-235)             |                                | 46 (32-48)                        |                                        | 36 (14-78)                 |                                 | 7 (3-16)                           |                                         | 32 (12-69)          |                          | 7 (2-14)                    |                                  |
| 2004 | Kyrgyzstan                       | 209 (148-218)             |                                | 43 (31-45)                        |                                        | 33 (13-71)                 |                                 | 7 (3-15)                           |                                         | 30 (11-64)          |                          | 6 (2-13)                    |                                  |
| 2005 | Kyrgyzstan                       | 199 (141-207)             |                                | 41 (29-43)                        |                                        | 31 (12-67)                 |                                 | 7 (2-14)                           |                                         | 28 (10-60)          |                          | 6 (2-12)                    |                                  |
| 2006 | Kyrgyzstan                       | 195 (138-203)             |                                | 40 (28-41)                        |                                        | 30 (11-65)                 |                                 | 6 (2-13)                           |                                         | 27 (10-58)          |                          | 5 (2-12)                    |                                  |
| 2007 | Kyrgyzstan                       | 193 (137-201)             |                                | 38 (27-39)                        |                                        | 30 (11-64)                 |                                 | 6 (2-13)                           |                                         | 27 (10-57)          |                          | 5 (2-11)                    |                                  |
| 2008 | Kyrgyzstan                       | 190 (135-198)             |                                | 35 (25-37)                        |                                        | 29 (11-62)                 |                                 | 5 (2-12)                           |                                         | 26 (10-56)          |                          | 5 (2-10)                    |                                  |
| 2009 | Kyrgyzstan                       | 191 (135-199)             |                                | 34 (24-35)                        |                                        | 29 (11-62)                 |                                 | 5 (2-11)                           |                                         | 26 (10-56)          |                          | 5 (2-10)                    |                                  |
| 2010 | Kyrgyzstan                       | 189 (134-197)             |                                | 32 (22-33)                        |                                        | 29 (11-61)                 |                                 | 5 (2-10)                           |                                         | 25 (9-55)           |                          | 4 (2-9)                     |                                  |
| 2011 | Kyrgyzstan                       | 188 (134-196)             |                                | 29 (21-31)                        |                                        | 28 (7-73)                  |                                 | 4 (1-11)                           |                                         | 25 (7-65)           |                          | 4 (1-10)                    |                                  |
| 2012 | Kyrgyzstan                       | 185 (131-193)             |                                | 27 (19-28)                        |                                        | 27 (7-71)                  |                                 | 4 (1-10)                           |                                         | 24 (8-63)           |                          | 4 (1-9)                     |                                  |
| 2013 | Kyrgyzstan                       | 181 (129-189)             |                                | 25 (18-26)                        |                                        | 27 (7-69)                  |                                 | 4 (1-10)                           |                                         | 24 (8-62)           |                          | 3 (1-9)                     |                                  |
| 2014 | Kyrgyzstan                       | 175 (124-182)             |                                | 23 (17-24)                        |                                        | 26 (7-67)                  |                                 | 3 (1-9)                            |                                         | 23 (8-59)           |                          | 3 (1-8)                     |                                  |
| 2015 | Kyrgyzstan                       | 164 (116-171)             | 2 (2-2)                        | 21 (15-22)                        | 0 (0-0)                                | 24 (6-62)                  | 0 (0-1)                         | 3 (1-8)                            | 0 (0-0)                                 | 21 (8-55)           | 0 (0-1)                  | 3 (1-7)                     | 0 (0-0)                          |
| 2000 | Lao People's Democratic Republic | 1206 (855-1257)           |                                | 153 (109-160)                     |                                        | 176 (61-404)               |                                 | 22 (8-51)                          |                                         | 55 (19-127)         |                          | 7 (2-16)                    |                                  |
| 2001 | Lao People's Democratic Republic | 1160 (822-1209)           |                                | 151 (107-157)                     |                                        | 167 (57-384)               |                                 | 22 (7-50)                          |                                         | 53 (18-121)         |                          | 7 (2-16)                    |                                  |
| 2002 | Lao People's Democratic Republic | 1118 (792-1165)           |                                | 148 (105-154)                     |                                        | 159 (54-365)               |                                 | 21 (7-48)                          |                                         | 50 (17-115)         |                          | 7 (2-15)                    |                                  |
| 2003 | Lao People's Democratic Republic | 1083 (768-1129)           |                                | 145 (103-151)                     |                                        | 151 (51-349)               |                                 | 20 (7-47)                          |                                         | 48 (16-110)         |                          | 6 (2-15)                    |                                  |
| 2004 | Lao People's Democratic Republic | 1051 (746-1096)           |                                | 141 (100-147)                     |                                        | 145 (49-334)               |                                 | 19 (7-45)                          |                                         | 45 (15-105)         |                          | 6 (2-14)                    |                                  |
| 2005 | Lao People's Democratic Republic | 1023 (725-1066)           |                                | 137 (97-143)                      |                                        | 138 (47-320)               |                                 | 19 (6-43)                          |                                         | 44 (15-101)         |                          | 6 (2-14)                    |                                  |
| 2006 | Lao People's Democratic Republic | 1000 (709-1043)           |                                | 134 (95-139)                      |                                        | 134 (45-309)               |                                 | 18 (6-41)                          |                                         | 42 (14-97)          |                          | 6 (2-13)                    |                                  |
| 2007 | Lao People's Democratic Republic | 976 (692-1017)            |                                | 129 (91-134)                      |                                        | 129 (45-294)               |                                 | 17 (6-39)                          |                                         | 41 (14-92)          |                          | 5 (2-12)                    |                                  |
| 2008 | Lao People's Democratic Republic | 955 (677-996)             |                                | 124 (88-129)                      |                                        | 125 (45-282)               |                                 | 16 (6-37)                          |                                         | 39 (14-89)          |                          | 5 (2-11)                    |                                  |
| 2009 | Lao People's Democratic Republic | 928 (658-967)             |                                | 118 (84-123)                      |                                        | 121 (45-268)               |                                 | 15 (6-34)                          |                                         | 38 (14-84)          |                          | 5 (2-11)                    |                                  |
| 2010 | Lao People's Democratic Republic | 901 (639-939)             |                                | 113 (80-118)                      |                                        | 117 (45-255)               |                                 | 15 (6-32)                          |                                         | 37 (14-80)          |                          | 5 (2-10)                    |                                  |
| 2011 | Lao People's Democratic Republic | 874 (619-910)             |                                | 107 (75-111)                      |                                        | 112 (45-242)               |                                 | 14 (6-30)                          |                                         | 35 (14-76)          |                          | 4 (2-9)                     |                                  |
| 2012 | Lao People's Democratic Republic | 835 (592-871)             |                                | 101 (72-106)                      |                                        | 107 (36-236)               |                                 | 13 (4-29)                          |                                         | 35 (12-76)          |                          | 4 (2-9)                     |                                  |
| 2013 | Lao People's Democratic Republic | 790 (560-823)             |                                | 96 (68-100)                       |                                        | 100 (35-221)               |                                 | 12 (4-27)                          |                                         | 89 (31-197)         |                          | 11 (4-24)                   |                                  |
| 2014 | Lao People's Democratic Republic | 502 (356-523)             |                                | 61 (43-64)                        |                                        | 59 (21-131)                |                                 | 7 (2-16)                           |                                         | 53 (18-116)         |                          | 6 (2-14)                    |                                  |
| 2015 | Lao People's Democratic Republic | 403 (286-420)             | 8 (5-8)                        | 49 (35-51)                        | 1 (1-1)                                | 49 (17-108)                | 1 (0-2)                         | 6 (2-13)                           | 0 (0-0)                                 | 44 (15-96)          | 1 (0-2)                  | 5 (2-12)                    | 0 (0-0)                          |
| 2000 | Latvia                           | 3 (2-3)                   |                                | 3 (2-3)                           |                                        | 2 (1-3)                    |                                 | 2 (1-3)                            |                                         | 1 (1-3)             |                          | 2 (1-3)                     |                                  |
| 2001 | Latvia                           | 4 (3-4)                   |                                | 4 (3-4)                           |                                        | 2 (1-3)                    |                                 | 2 (1-4)                            |                                         | 2 (1-3)             |                          | 2 (1-3)                     |                                  |
| 2002 | Latvia                           | 2 (1-2)                   |                                | 2 (1-2)                           |                                        | 0 (0-1)                    |                                 | 0 (0-1)                            |                                         | 0 (0-1)             |                          | 0 (0-1)                     |                                  |
| 2003 | Latvia                           | 2 (2-2)                   |                                | 2 (2-2)                           |                                        | 2 (1-3)                    |                                 | 2 (1-4)                            |                                         | 2 (1-3)             |                          | 2 (1-3)                     |                                  |
| 2004 | Latvia                           | 2 (1-2)                   |                                | 2 (1-2)                           |                                        | 1 (1-2)                    |                                 | 1 (1-2)                            |                                         | 1 (0-2)             |                          | 1 (0-2)                     |                                  |
| 2005 | Latvia                           | 4 (3-4)                   |                                | 4 (3-4)                           |                                        | 1 (1-3)                    |                                 | 1 (1-3)                            |                                         | 1 (1-2)             |                          | 1 (1-2)                     |                                  |
| 2006 | Latvia                           | 2 (1-2)                   |                                | 2 (1-2)                           |                                        | 1 (1-3)                    |                                 | 1 (1-3)                            |                                         | 1 (1-2)             |                          | 1 (1-2)                     |                                  |

| Year | Country   | Spn pneumonia deaths (UR) | Spn pneumonia deaths, HIV (UR) | Spn pneumonia mortality rate (UR) | Spn pneumonia mortality rate, HIV (UR) | Spn meningitis deaths (UR) | Spn meningitis deaths, HIV (UR) | Spn meningitis mortality rate (UR) | Spn meningitis mortality rate, HIV (UR) | Spn NPNM deaths (UR) | Spn NPNM deaths, HIV (UR) | Spn NPNM mortality rate (UR) | Spn NPNM mortality rate, HIV (UR) |
|------|-----------|---------------------------|--------------------------------|-----------------------------------|----------------------------------------|----------------------------|---------------------------------|------------------------------------|-----------------------------------------|----------------------|---------------------------|------------------------------|-----------------------------------|
| 2007 | Latvia    | 3 (2-3)                   |                                | 3 (2-3)                           |                                        | 1 (0-1)                    |                                 | 0 (0-1)                            |                                         | 0 (0-1)              |                           | 0 (0-1)                      |                                   |
| 2008 | Latvia    | 0 (0-0)                   |                                | 0 (0-0)                           |                                        | 1 (1-2)                    |                                 | 1 (1-2)                            |                                         | 1 (1-2)              |                           | 1 (0-2)                      |                                   |
| 2009 | Latvia    | 1 (1-1)                   |                                | 1 (1-1)                           |                                        | 1 (0-2)                    |                                 | 1 (0-2)                            |                                         | 1 (0-1)              |                           | 1 (0-1)                      |                                   |
| 2010 | Latvia    | 2 (2-2)                   |                                | 2 (1-2)                           |                                        | 0 (0-0)                    |                                 | 0 (0-0)                            |                                         | 0 (0-0)              |                           | 0 (0-0)                      |                                   |
| 2011 | Latvia    | 1 (1-1)                   |                                | 1 (1-1)                           |                                        | 1 (1-2)                    |                                 | 1 (0-2)                            |                                         | 1 (0-2)              |                           | 1 (0-2)                      |                                   |
| 2012 | Latvia    | 1 (1-1)                   |                                | 1 (1-1)                           |                                        | 0 (0-0)                    |                                 | 0 (0-0)                            |                                         | 0 (0-0)              |                           | 0 (0-0)                      |                                   |
| 2013 | Latvia    | 1 (1-1)                   |                                | 1 (1-1)                           |                                        | 0 (0-0)                    |                                 | 0 (0-0)                            |                                         | 0 (0-0)              |                           | 0 (0-0)                      |                                   |
| 2014 | Latvia    | 1 (0-1)                   |                                | 1 (1-1)                           |                                        | 0 (0-0)                    |                                 | 0 (0-0)                            |                                         | 0 (0-0)              |                           | 0 (0-0)                      |                                   |
| 2015 | Latvia    | 0 (0-0)                   | 0 (0-0)                        | 0 (0-1)                           | 0 (0-0)                                | 0 (0-0)                    | 0 (0-0)                         | 0 (0-0)                            | 0 (0-0)                                 | 0 (0-0)              | 0 (0-0)                   | 0 (0-0)                      | 0 (0-0)                           |
| 2000 | Lebanon   | 32 (23-34)                |                                | 11 (8-11)                         |                                        | 3 (1-6)                    |                                 | 1 (0-2)                            |                                         | 2 (1-5)              |                           | 1 (0-2)                      |                                   |
| 2001 | Lebanon   | 29 (20-30)                |                                | 9 (7-10)                          |                                        | 2 (1-5)                    |                                 | 1 (0-2)                            |                                         | 2 (1-5)              |                           | 1 (0-2)                      |                                   |
| 2002 | Lebanon   | 27 (19-28)                |                                | 9 (6-9)                           |                                        | 2 (1-5)                    |                                 | 1 (0-2)                            |                                         | 2 (1-4)              |                           | 1 (0-1)                      |                                   |
| 2003 | Lebanon   | 27 (19-28)                |                                | 8 (6-8)                           |                                        | 3 (1-8)                    |                                 | 1 (0-2)                            |                                         | 3 (1-7)              |                           | 1 (0-2)                      |                                   |
| 2004 | Lebanon   | 25 (18-26)                |                                | 8 (5-8)                           |                                        | 3 (1-8)                    |                                 | 1 (0-2)                            |                                         | 3 (1-7)              |                           | 1 (0-2)                      |                                   |
| 2005 | Lebanon   | 22 (16-23)                |                                | 7 (5-7)                           |                                        | 3 (1-7)                    |                                 | 1 (0-2)                            |                                         | 3 (1-6)              |                           | 1 (0-2)                      |                                   |
| 2006 | Lebanon   | 19 (13-20)                |                                | 6 (4-6)                           |                                        | 2 (1-6)                    |                                 | 1 (0-2)                            |                                         | 2 (1-5)              |                           | 1 (0-2)                      |                                   |
| 2007 | Lebanon   | 16 (11-16)                |                                | 5 (4-6)                           |                                        | 2 (1-5)                    |                                 | 1 (0-2)                            |                                         | 2 (1-4)              |                           | 1 (0-1)                      |                                   |
| 2008 | Lebanon   | 13 (9-14)                 |                                | 5 (3-5)                           |                                        | 2 (1-4)                    |                                 | 1 (0-1)                            |                                         | 2 (1-4)              |                           | 1 (0-1)                      |                                   |
| 2009 | Lebanon   | 11 (8-12)                 |                                | 4 (3-5)                           |                                        | 2 (1-3)                    |                                 | 1 (0-1)                            |                                         | 1 (1-3)              |                           | 1 (0-1)                      |                                   |
| 2010 | Lebanon   | 11 (8-11)                 |                                | 4 (3-4)                           |                                        | 1 (1-3)                    |                                 | 1 (0-1)                            |                                         | 1 (0-3)              |                           | 0 (0-1)                      |                                   |
| 2011 | Lebanon   | 11 (8-12)                 |                                | 4 (3-4)                           |                                        | 2 (1-3)                    |                                 | 1 (0-1)                            |                                         | 1 (1-3)              |                           | 0 (0-1)                      |                                   |
| 2012 | Lebanon   | 12 (9-13)                 |                                | 4 (3-4)                           |                                        | 2 (1-4)                    |                                 | 0 (0-1)                            |                                         | 1 (1-3)              |                           | 0 (0-1)                      |                                   |
| 2013 | Lebanon   | 14 (10-14)                |                                | 4 (3-4)                           |                                        | 2 (1-4)                    |                                 | 0 (0-1)                            |                                         | 2 (1-4)              |                           | 0 (0-1)                      |                                   |
| 2014 | Lebanon   | 15 (11-15)                |                                | 3 (2-4)                           |                                        | 2 (1-4)                    |                                 | 0 (0-1)                            |                                         | 2 (1-4)              |                           | 0 (0-1)                      |                                   |
| 2015 | Lebanon   | 15 (11-16)                | 0 (0-0)                        | 3 (2-3)                           | 0 (0-0)                                | 2 (1-4)                    | 0 (0-0)                         | 0 (0-1)                            | 0 (0-0)                                 | 2 (1-4)              | 0 (0-0)                   | 0 (0-1)                      | 0 (0-0)                           |
| 2000 | Lesotho   | 309 (219-322)             |                                | 117 (83-121)                      |                                        | 49 (20-103)                |                                 | 19 (8-39)                          |                                         | 15 (6-32)            |                           | 6 (2-12)                     |                                   |
| 2001 | Lesotho   | 317 (226-331)             |                                | 120 (85-125)                      |                                        | 50 (21-103)                |                                 | 19 (8-39)                          |                                         | 16 (6-33)            |                           | 6 (2-12)                     |                                   |
| 2002 | Lesotho   | 321 (228-335)             |                                | 123 (87-128)                      |                                        | 50 (21-104)                |                                 | 19 (8-39)                          |                                         | 16 (7-33)            |                           | 6 (3-12)                     |                                   |
| 2003 | Lesotho   | 322 (228-335)             |                                | 125 (89-130)                      |                                        | 50 (22-103)                |                                 | 20 (9-40)                          |                                         | 16 (7-32)            |                           | 6 (3-13)                     |                                   |
| 2004 | Lesotho   | 320 (227-334)             |                                | 127 (90-132)                      |                                        | 51 (22-102)                |                                 | 20 (9-40)                          |                                         | 16 (7-32)            |                           | 6 (3-13)                     |                                   |
| 2005 | Lesotho   | 320 (227-334)             |                                | 129 (91-134)                      |                                        | 51 (23-102)                |                                 | 20 (9-41)                          |                                         | 16 (7-32)            |                           | 6 (3-13)                     |                                   |
| 2006 | Lesotho   | 322 (228-336)             |                                | 132 (93-137)                      |                                        | 52 (23-102)                |                                 | 21 (10-42)                         |                                         | 16 (7-32)            |                           | 7 (3-13)                     |                                   |
| 2007 | Lesotho   | 323 (229-337)             |                                | 133 (94-138)                      |                                        | 52 (24-102)                |                                 | 21 (10-42)                         |                                         | 16 (7-32)            |                           | 7 (3-13)                     |                                   |
| 2008 | Lesotho   | 326 (231-340)             |                                | 133 (95-139)                      |                                        | 52 (24-102)                |                                 | 21 (10-42)                         |                                         | 16 (8-32)            |                           | 7 (3-13)                     |                                   |
| 2009 | Lesotho   | 325 (231-339)             |                                | 131 (93-137)                      |                                        | 52 (24-101)                |                                 | 21 (10-41)                         |                                         | 16 (8-32)            |                           | 7 (3-13)                     |                                   |
| 2010 | Lesotho   | 325 (230-338)             |                                | 130 (92-135)                      |                                        | 51 (24-100)                |                                 | 20 (10-40)                         |                                         | 16 (8-32)            |                           | 6 (3-13)                     |                                   |
| 2011 | Lesotho   | 326 (231-340)             |                                | 128 (91-133)                      |                                        | 51 (24-100)                |                                 | 20 (9-39)                          |                                         | 16 (7-31)            |                           | 6 (3-12)                     |                                   |
| 2012 | Lesotho   | 331 (235-345)             |                                | 127 (90-132)                      |                                        | 51 (24-100)                |                                 | 20 (9-39)                          |                                         | 16 (7-31)            |                           | 6 (3-12)                     |                                   |
| 2013 | Lesotho   | 334 (237-348)             |                                | 126 (89-131)                      |                                        | 50 (23-98)                 |                                 | 19 (8-37)                          |                                         | 16 (7-31)            |                           | 6 (3-12)                     |                                   |
| 2014 | Lesotho   | 334 (237-348)             |                                | 124 (88-129)                      |                                        | 50 (23-98)                 |                                 | 18 (8-36)                          |                                         | 16 (7-31)            |                           | 6 (3-11)                     |                                   |
| 2015 | Lesotho   | 296 (210-309)             | 149 (106-155)                  | 108 (77-113)                      | 54 (39-57)                             | 43 (20-85)                 | 22 (10-43)                      | 16 (7-31)                          | 8 (4-16)                                | 14 (6-27)            | 7 (3-13)                  | 5 (2-10)                     | 2 (1-5)                           |
| 2000 | Liberia   | 842 (597-878)             |                                | 172 (122-180)                     |                                        | 252 (159-404)              |                                 | 52 (33-83)                         |                                         | 79 (50-127)          |                           | 16 (10-26)                   |                                   |
| 2001 | Liberia   | 838 (594-873)             |                                | 163 (116-170)                     |                                        | 249 (157-404)              |                                 | 49 (30-79)                         |                                         | 78 (49-127)          |                           | 15 (10-25)                   |                                   |
| 2002 | Liberia   | 812 (576-846)             |                                | 153 (109-160)                     |                                        | 240 (150-395)              |                                 | 45 (28-75)                         |                                         | 75 (47-124)          |                           | 14 (9-23)                    |                                   |
| 2003 | Liberia   | 776 (550-809)             |                                | 145 (103-151)                     |                                        | 231 (114-303)              |                                 | 43 (21-80)                         |                                         | 73 (35-135)          |                           | 14 (8-25)                    |                                   |
| 2004 | Liberia   | 749 (531-781)             |                                | 138 (98-144)                      |                                        | 217 (103-313)              |                                 | 40 (19-76)                         |                                         | 68 (32-130)          |                           | 13 (6-24)                    |                                   |
| 2005 | Liberia   | 740 (525-772)             |                                | 133 (95-139)                      |                                        | 207 (97-400)               |                                 | 37 (17-72)                         |                                         | 65 (31-126)          |                           | 12 (5-23)                    |                                   |
| 2006 | Liberia   | 736 (522-767)             |                                | 129 (91-134)                      |                                        | 198 (92-388)               |                                 | 35 (16-68)                         |                                         | 62 (29-122)          |                           | 11 (5-21)                    |                                   |
| 2007 | Liberia   | 740 (525-771)             |                                | 125 (89-131)                      |                                        | 191 (87-379)               |                                 | 32 (15-64)                         |                                         | 60 (27-119)          |                           | 10 (5-20)                    |                                   |
| 2008 | Liberia   | 746 (529-778)             |                                | 122 (87-127)                      |                                        | 187 (84-374)               |                                 | 31 (14-61)                         |                                         | 59 (26-117)          |                           | 10 (4-19)                    |                                   |
| 2009 | Liberia   | 743 (527-775)             |                                | 118 (84-123)                      |                                        | 180 (79-365)               |                                 | 29 (13-58)                         |                                         | 57 (25-115)          |                           | 9 (4-18)                     |                                   |
| 2010 | Liberia   | 726 (515-757)             |                                | 113 (80-117)                      |                                        | 171 (74-350)               |                                 | 27 (12-54)                         |                                         | 54 (23-110)          |                           | 8 (4-17)                     |                                   |
| 2011 | Liberia   | 701 (497-731)             |                                | 107 (76-111)                      |                                        | 162 (69-334)               |                                 | 25 (11-51)                         |                                         | 51 (22-105)          |                           | 8 (3-16)                     |                                   |
| 2012 | Liberia   | 677 (480-706)             |                                | 102 (72-106)                      |                                        | 154 (65-320)               |                                 | 23 (10-48)                         |                                         | 48 (20-101)          |                           | 7 (3-15)                     |                                   |
| 2013 | Liberia   | 646 (458-674)             |                                | 96 (68-100)                       |                                        | 146 (60-306)               |                                 | 22 (9-45)                          |                                         | 46 (19-96)           |                           | 7 (3-14)                     |                                   |
| 2014 | Liberia   | 520 (369-542)             |                                | 76 (54-80)                        |                                        | 113 (39-247)               |                                 | 17 (6-36)                          |                                         | 101 (35-220)         |                           | 15 (5-32)                    |                                   |
| 2015 | Liberia   | 452 (320-471)             | 25 (18-26)                     | 65 (46-88)                        | 4 (3-4)                                | 97 (33-213)                | 5 (2-12)                        | 14 (6-31)                          | 1 (0-2)                                 | 87 (29-190)          | 5 (2-11)                  | 13 (4-28)                    | 1 (0-2)                           |
| 2000 | Libya     | 104 (74-108)              |                                | 19 (13-20)                        |                                        | 14 (9-19)                  |                                 | 3 (2-3)                            |                                         | 12 (8-16)            |                           | 2 (1-3)                      |                                   |
| 2001 | Libya     | 99 (70-103)               |                                | 18 (13-19)                        |                                        | 13 (8-18)                  |                                 | 2 (1-3)                            |                                         | 12 (7-16)            |                           | 2 (1-3)                      |                                   |
| 2002 | Libya     | 95 (67-99)                |                                | 17 (12-18)                        |                                        | 13 (8-17)                  |                                 | 2 (1-3)                            |                                         | 11 (7-15)            |                           | 2 (1-3)                      |                                   |
| 2003 | Libya     | 89 (63-93)                |                                | 16 (11-16)                        |                                        | 12 (7-16)                  |                                 | 2 (1-3)                            |                                         | 11 (7-14)            |                           | 2 (1-3)                      |                                   |
| 2004 | Libya     | 83 (59-87)                |                                | 15 (10-15)                        |                                        | 11 (7-15)                  |                                 | 2 (1-3)                            |                                         | 10 (6-13)            |                           | 2 (1-2)                      |                                   |
| 2005 | Libya     | 77 (55-81)                |                                | 13 (9-14)                         |                                        | 10 (7-14)                  |                                 | 2 (1-2)                            |                                         | 9 (6-12)             |                           | 2 (1-2)                      |                                   |
| 2006 | Libya     | 72 (51-75)                |                                | 12 (8-12)                         |                                        | 10 (6-13)                  |                                 | 2 (1-2)                            |                                         | 9 (5-12)             |                           | 1 (1-2)                      |                                   |
| 2007 | Libya     | 72 (51-75)                |                                | 12 (8-12)                         |                                        | 13 (8-18)                  |                                 | 2 (1-3)                            |                                         | 12 (7-16)            |                           | 2 (1-3)                      |                                   |
| 2008 | Libya     | 73 (51-76)                |                                | 11 (8-12)                         |                                        | 14 (9-19)                  |                                 | 2 (1-3)                            |                                         | 13 (8-17)            |                           | 2 (1-3)                      |                                   |
| 2009 | Libya     | 68 (48-70)                |                                | 10 (7-11)                         |                                        | 13 (8-17)                  |                                 | 2 (1-3)                            |                                         | 11 (7-15)            |                           | 2 (1-2)                      |                                   |
| 2010 | Libya     | 64 (45-67)                |                                | 10 (7-10)                         |                                        | 12 (7-16)                  |                                 | 2 (1-2)                            |                                         | 11 (7-14)            |                           | 2 (1-2)                      |                                   |
| 2011 | Libya     | 62 (44-64)                |                                | 9 (7-10)                          |                                        | 11 (7-15)                  |                                 | 2 (1-2)                            |                                         | 10 (6-13)            |                           | 1 (1-2)                      |                                   |
| 2012 | Libya     | 57 (40-59)                |                                | 8 (6-9)                           |                                        | 10 (6-14)                  |                                 | 2 (1-2)                            |                                         | 9 (6-12)             |                           | 1 (1-2)                      |                                   |
| 2013 | Libya     | 52 (37-54)                |                                | 8 (6-8)                           |                                        | 9 (6-12)                   |                                 | 1 (1-2)                            |                                         | 8 (5-11)             |                           | 1 (1-2)                      |                                   |
| 2014 | Libya     | 43 (30-44)                |                                | 7 (5-7)                           |                                        | 7 (5-10)                   |                                 | 1 (1-2)                            |                                         | 7 (4-9)              |                           | 1 (1-1)                      |                                   |
| 2015 | Libya     | 38 (27-40)                | 0 (0-0)                        | 6 (4-6)                           | 0 (0-0)                                | 7 (4-9)                    | 0 (0-0)                         | 1 (1-1)                            | 0 (0-0)                                 | 6 (4-8)              | 0 (0-0)                   | 1 (1-1)                      | 0 (0-0)                           |
| 2000 | Lithuania | 10 (7-11)                 |                                | 6 (4-6)                           |                                        | 3 (1-5)                    |                                 | 1 (1-3)                            |                                         | 2 (1-4)              |                           | 1 (1-2)                      |                                   |
| 2001 | Lithuania | 7 (5-7)                   |                                | 4 (3-4)                           |                                        | 3 (1-5)                    |                                 | 2 (1-3)                            |                                         | 3 (1-5)              |                           | 1 (1-3)                      |                                   |
| 2002 | Lithuania | 10 (7-10)                 |                                | 6 (4-6)                           |                                        | 3 (1-5)                    |                                 | 2 (1-3)                            |                                         | 3 (1-5)              |                           | 2 (1-3)                      |                                   |
| 2003 | Lithuania | 7 (5-7)                   |                                | 4 (3-5)                           |                                        | 3 (2-6)                    |                                 | 2 (1-4)                            |                                         | 3 (1-6)              |                           | 2 (1-4)                      |                                   |
| 2004 | Lithuania | 8 (6-9)                   |                                | 6 (4-6)                           |                                        | 1 (0-2)                    |                                 | 1 (0-1)                            |                                         | 1 (0-1)              |                           | 1 (0-1)                      |                                   |
| 2005 | Lithuania | 9 (7-10)                  |                                | 6 (5-7)                           |                                        | 2 (1-4)                    |                                 | 2 (1-3)                            |                                         | 2 (1-4)              |                           | 1 (1-3)                      |                                   |
| 2006 | Lithuania | 7 (5-7)                   |                                | 5 (3-5)                           |                                        | 3 (1-5)                    |                                 | 2 (1-3)                            |                                         | 2 (1-4)              |                           | 2 (1-3)                      |                                   |
| 2007 | Lithuania | 4 (3-5)                   |                                | 3 (2-3)                           |                                        | 2 (1-3)                    |                                 | 1 (1-2)                            |                                         | 2 (1-3)              |                           | 1 (1-2)                      |                                   |
| 2008 | Lithuania | 4 (3-4)                   |                                | 3 (2-3)                           |                                        | 2 (1-3)                    |                                 | 1 (0-2)                            |                                         | 1 (1-2)              |                           | 1 (0-2)                      |                                   |
| 2009 | Lithuania | 6 (6-9)                   |                                | 6 (4-6)                           |                                        | 1 (0-2)                    |                                 | 1 (0-1)                            |                                         | 1 (0-1)              |                           | 1 (0-1)                      |                                   |
| 2010 | Lithuania | 2 (1-2)                   |                                | 1 (1-1)                           |                                        | 3 (1-6)                    |                                 | 2 (1-4)                            |                                         | 3 (1-5)              |                           | 2 (1-4)                      |                                   |
| 2011 | Lithuania | 1 (1-1)                   |                                | 1 (1-1)                           |                                        | 2 (1-4)                    |                                 | 1 (1-3)                            |                                         | 2 (1-3)              |                           | 1 (1-2)                      |                                   |
| 2012 | Lithuania | 5 (4-5)                   |                                | 3 (2-4)                           |                                        | 2 (1-4)                    |                                 | 1 (1-3)                            |                                         | 2 (1-4)              |                           | 1 (1-2)                      |                                   |
| 2013 | Lithuania | 3 (2-3)                   |                                | 2 (1-2)                           |                                        | 2 (1-4)                    |                                 | 1 (1-3)                            |                                         | 2 (1-3)              |                           | 1 (1-2)                      |                                   |
| 2014 | Lithuania | 3 (2-3)                   |                                | 2 (1-2)                           |                                        | 2 (1-4)                    |                                 | 1 (1-3)                            |                                         | 2 (1-3)              |                           | 1 (1-2)                      |                                   |

Spn = *Streptococcus pneumoniae*; npnm = non-pneumonia, non-meningitis; HIV = deaths only in HIV-infected children; Uncertainty range provided in parentheses.

| Year | Country    | Spn pneumonia deaths (UR) | Spn pneumonia deaths, HIV (UR) | Spn pneumonia mortality rate (UR) | Spn pneumonia mortality rate, HIV (UR) | Spn meningitis deaths (UR) | Spn meningitis deaths, HIV (UR) | Spn meningitis mortality rate (UR) | Spn meningitis mortality rate, HIV (UR) | Spn NPNM deaths (UR) | Spn NPNM deaths, HIV (UR) | Spn NPNM mortality rate (UR) | Spn NPNM mortality rate, HIV (UR) |
|------|------------|---------------------------|--------------------------------|-----------------------------------|----------------------------------------|----------------------------|---------------------------------|------------------------------------|-----------------------------------------|----------------------|---------------------------|------------------------------|-----------------------------------|
| 2015 | Lithuania  | 3 (2-3)                   | 0 (0-0)                        | 2 (1-2)                           | 0 (0-0)                                | 2 (1-4)                    | 0 (0-0)                         | 1 (1-3)                            | 0 (0-0)                                 | 2 (1-3)              | 0 (0-0)                   | 1 (1-2)                      | 0 (0-0)                           |
| 2000 | Luxembourg | 0 (0-0)                   | 0 (0-0)                        | 0 (0-0)                           | 0 (0-0)                                | 1 (0-1)                    | 0 (0-0)                         | 2 (1-4)                            | 0 (0-0)                                 | 1 (0-1)              | 0 (0-0)                   | 2 (1-4)                      | 0 (0-0)                           |
| 2001 | Luxembourg | 0 (0-0)                   | 0 (0-0)                        | 0 (0-0)                           | 0 (0-0)                                | 0 (0-1)                    | 0 (0-0)                         | 2 (1-3)                            | 0 (0-0)                                 | 0 (0-1)              | 0 (0-0)                   | 1 (1-3)                      | 0 (0-0)                           |
| 2002 | Luxembourg | 0 (0-0)                   | 0 (0-0)                        | 0 (0-0)                           | 0 (0-0)                                | 0 (0-0)                    | 0 (0-0)                         | 1 (0-1)                            | 0 (0-0)                                 | 0 (0-0)              | 0 (0-0)                   | 1 (0-1)                      | 0 (0-0)                           |
| 2003 | Luxembourg | 0 (0-0)                   | 0 (0-0)                        | 0 (0-0)                           | 0 (0-0)                                | 0 (0-0)                    | 0 (0-0)                         | 0 (0-0)                            | 0 (0-0)                                 | 0 (0-0)              | 0 (0-0)                   | 0 (0-0)                      | 0 (0-0)                           |
| 2004 | Luxembourg | 0 (0-0)                   | 0 (0-0)                        | 0 (0-0)                           | 0 (0-0)                                | 0 (0-0)                    | 0 (0-0)                         | 0 (0-0)                            | 0 (0-0)                                 | 0 (0-0)              | 0 (0-0)                   | 0 (0-0)                      | 0 (0-0)                           |
| 2005 | Luxembourg | 0 (0-0)                   | 0 (0-0)                        | 0 (0-0)                           | 0 (0-0)                                | 0 (0-0)                    | 0 (0-0)                         | 0 (0-0)                            | 0 (0-0)                                 | 0 (0-0)              | 0 (0-0)                   | 0 (0-0)                      | 0 (0-0)                           |
| 2006 | Luxembourg | 0 (0-0)                   | 1 (1-1)                        | 0 (0-0)                           | 1 (1-1)                                | 0 (0-0)                    | 0 (0-0)                         | 0 (0-0)                            | 0 (0-0)                                 | 0 (0-0)              | 0 (0-0)                   | 0 (0-0)                      | 0 (0-0)                           |
| 2007 | Luxembourg | 0 (0-0)                   | 0 (0-0)                        | 1 (0-1)                           | 0 (0-0)                                | 0 (0-0)                    | 0 (0-0)                         | 0 (0-0)                            | 0 (0-0)                                 | 0 (0-0)              | 0 (0-0)                   | 0 (0-0)                      | 0 (0-0)                           |
| 2008 | Luxembourg | 0 (0-0)                   | 0 (0-0)                        | 1 (0-1)                           | 0 (0-0)                                | 0 (0-0)                    | 0 (0-0)                         | 0 (0-1)                            | 0 (0-0)                                 | 0 (0-0)              | 0 (0-0)                   | 0 (0-1)                      | 0 (0-0)                           |
| 2009 | Luxembourg | 0 (0-0)                   | 0 (0-0)                        | 0 (0-0)                           | 0 (0-0)                                | 0 (0-0)                    | 0 (0-0)                         | 1 (0-1)                            | 0 (0-0)                                 | 0 (0-0)              | 0 (0-0)                   | 0 (0-1)                      | 0 (0-0)                           |
| 2010 | Luxembourg | 0 (0-0)                   | 0 (0-0)                        | 0 (0-0)                           | 0 (0-0)                                | 0 (0-0)                    | 0 (0-0)                         | 0 (0-1)                            | 0 (0-0)                                 | 0 (0-0)              | 0 (0-0)                   | 0 (0-1)                      | 0 (0-0)                           |
| 2011 | Luxembourg | 0 (0-0)                   | 0 (0-0)                        | 0 (0-0)                           | 0 (0-0)                                | 0 (0-0)                    | 0 (0-0)                         | 0 (0-0)                            | 0 (0-0)                                 | 0 (0-0)              | 0 (0-0)                   | 0 (0-0)                      | 0 (0-0)                           |
| 2012 | Luxembourg | 0 (0-0)                   | 0 (0-0)                        | 0 (0-0)                           | 0 (0-0)                                | 0 (0-0)                    | 0 (0-0)                         | 0 (0-0)                            | 0 (0-0)                                 | 0 (0-0)              | 0 (0-0)                   | 0 (0-0)                      | 0 (0-0)                           |
| 2013 | Luxembourg | 0 (0-0)                   | 0 (0-0)                        | 0 (0-0)                           | 0 (0-0)                                | 0 (0-0)                    | 0 (0-0)                         | 0 (0-0)                            | 0 (0-0)                                 | 0 (0-0)              | 0 (0-0)                   | 0 (0-0)                      | 0 (0-0)                           |
| 2014 | Luxembourg | 0 (0-0)                   | 0 (0-0)                        | 0 (0-0)                           | 0 (0-0)                                | 0 (0-0)                    | 0 (0-0)                         | 0 (0-0)                            | 0 (0-0)                                 | 0 (0-0)              | 0 (0-0)                   | 0 (0-0)                      | 0 (0-0)                           |
| 2015 | Luxembourg | 0 (0-0)                   | 0 (0-0)                        | 0 (0-0)                           | 0 (0-0)                                | 0 (0-0)                    | 0 (0-0)                         | 0 (0-0)                            | 0 (0-0)                                 | 0 (0-0)              | 0 (0-0)                   | 0 (0-0)                      | 0 (0-0)                           |
| 2000 | Madagascar | 4461 (3163-4649)          |                                | 160 (113-166)                     |                                        | 801 (322-1701)             |                                 | 29 (12-61)                         |                                         | 252 (101-535)        |                           | 9 (4-19)                     |                                   |
| 2001 | Madagascar | 4297 (3047-4479)          |                                | 150 (106-156)                     |                                        | 775 (312-1644)             |                                 | 27 (11-57)                         |                                         | 244 (98-517)         |                           | 8 (3-18)                     |                                   |
| 2002 | Madagascar | 4100 (2907-4273)          |                                | 140 (99-146)                      |                                        | 745 (301-1579)             |                                 | 25 (10-54)                         |                                         | 234 (95-496)         |                           | 8 (3-17)                     |                                   |
| 2003 | Madagascar | 3892 (2760-4056)          |                                | 131 (93-137)                      |                                        | 711 (288-1504)             |                                 | 24 (10-51)                         |                                         | 223 (91-473)         |                           | 8 (3-16)                     |                                   |
| 2004 | Madagascar | 3675 (2606-3830)          |                                | 122 (87-127)                      |                                        | 671 (272-1423)             |                                 | 22 (9-47)                          |                                         | 211 (86-447)         |                           | 7 (3-15)                     |                                   |
| 2005 | Madagascar | 3494 (2477-3641)          |                                | 114 (81-119)                      |                                        | 634 (254-1352)             |                                 | 21 (8-44)                          |                                         | 199 (80-425)         |                           | 7 (3-14)                     |                                   |
| 2006 | Madagascar | 3312 (2348-3451)          |                                | 107 (76-112)                      |                                        | 595 (236-1277)             |                                 | 19 (8-41)                          |                                         | 187 (74-402)         |                           | 6 (3-13)                     |                                   |
| 2007 | Madagascar | 3167 (2246-3301)          |                                | 101 (71-105)                      |                                        | 563 (185-1255)             |                                 | 18 (6-40)                          |                                         | 162 (64-348)         |                           | 6 (3-13)                     |                                   |
| 2008 | Madagascar | 3049 (2182-3178)          |                                | 95 (68-99)                        |                                        | 538 (174-1208)             |                                 | 17 (6-38)                          |                                         | 147 (55-304)         |                           | 5 (3-12)                     |                                   |
| 2009 | Madagascar | 2964 (2102-3089)          |                                | 91 (64-95)                        |                                        | 523 (170-1175)             |                                 | 16 (5-36)                          |                                         | 145 (51-304)         |                           | 5 (3-12)                     |                                   |
| 2010 | Madagascar | 2875 (2039-2996)          |                                | 86 (61-90)                        |                                        | 508 (164-1145)             |                                 | 15 (5-34)                          |                                         | 142 (46-304)         |                           | 4 (3-11)                     |                                   |
| 2011 | Madagascar | 2813 (1995-2932)          |                                | 83 (59-86)                        |                                        | 499 (161-1127)             |                                 | 15 (5-33)                          |                                         | 144 (43-304)         |                           | 4 (3-10)                     |                                   |
| 2012 | Madagascar | 2754 (1953-2870)          |                                | 79 (56-83)                        |                                        | 491 (157-1109)             |                                 | 14 (5-32)                          |                                         | 137 (40-287)         |                           | 4 (3-11)                     |                                   |
| 2013 | Madagascar | 1945 (1379-2027)          |                                | 55 (39-57)                        |                                        | 329 (105-744)              |                                 | 9 (3-21)                           |                                         | 293 (94-662)         |                           | 8 (3-19)                     |                                   |
| 2014 | Madagascar | 1725 (1223-1797)          |                                | 48 (34-50)                        |                                        | 294 (95-663)               |                                 | 8 (3-18)                           |                                         | 251 (84-590)         |                           | 7 (2-16)                     |                                   |
| 2015 | Madagascar | 1590 (1128-1657)          | 25 (18-26)                     | 43 (30-45)                        | 1 (0-1)                                | 282 (91-635)               | 4 (1-10)                        | 8 (2-17)                           | 0 (0-0)                                 | 251 (81-566)         | 4 (1-9)                   | 7 (2-15)                     | 0 (0-0)                           |
| 2000 | Malawi     | 4149 (2942-4324)          |                                | 207 (146-215)                     |                                        | 948 (491-1847)             |                                 | 47 (24-92)                         |                                         | 298 (154-581)        |                           | 15 (8-29)                    |                                   |
| 2001 | Malawi     | 3921 (2780-4086)          |                                | 190 (135-198)                     |                                        | 899 (472-1746)             |                                 | 44 (23-85)                         |                                         | 283 (148-549)        |                           | 14 (7-27)                    |                                   |
| 2002 | Malawi     | 3606 (2557-3758)          |                                | 171 (121-178)                     |                                        | 828 (295-1839)             |                                 | 39 (14-87)                         |                                         | 260 (93-578)         |                           | 13 (4-27)                    |                                   |
| 2003 | Malawi     | 3291 (2334-3430)          |                                | 153 (108-159)                     |                                        | 759 (276-1675)             |                                 | 35 (13-78)                         |                                         | 238 (87-527)         |                           | 11 (4-24)                    |                                   |
| 2004 | Malawi     | 3036 (2153-3164)          |                                | 138 (98-144)                      |                                        | 703 (260-1539)             |                                 | 32 (12-70)                         |                                         | 221 (82-484)         |                           | 10 (4-22)                    |                                   |
| 2005 | Malawi     | 2835 (2010-2954)          |                                | 126 (89-133)                      |                                        | 660 (260-1414)             |                                 | 29 (12-63)                         |                                         | 208 (82-445)         |                           | 9 (4-20)                     |                                   |
| 2006 | Malawi     | 2759 (1956-2875)          |                                | 119 (85-124)                      |                                        | 646 (271-1349)             |                                 | 28 (12-58)                         |                                         | 203 (85-424)         |                           | 9 (4-18)                     |                                   |
| 2007 | Malawi     | 2651 (1880-2763)          |                                | 111 (79-116)                      |                                        | 624 (271-1273)             |                                 | 26 (11-53)                         |                                         | 196 (85-400)         |                           | 8 (4-17)                     |                                   |
| 2008 | Malawi     | 2569 (1822-2678)          |                                | 104 (74-109)                      |                                        | 609 (275-1211)             |                                 | 25 (11-49)                         |                                         | 191 (86-381)         |                           | 8 (4-15)                     |                                   |
| 2009 | Malawi     | 2552 (1810-2660)          |                                | 101 (71-105)                      |                                        | 606 (286-1182)             |                                 | 24 (11-47)                         |                                         | 191 (90-372)         |                           | 8 (4-15)                     |                                   |
| 2010 | Malawi     | 2430 (1723-2532)          |                                | 93 (66-97)                        |                                        | 578 (287-1106)             |                                 | 22 (11-42)                         |                                         | 182 (90-348)         |                           | 7 (3-13)                     |                                   |
| 2011 | Malawi     | 2508 (1778-2613)          |                                | 93 (66-97)                        |                                        | 596 (292-1138)             |                                 | 22 (11-42)                         |                                         | 187 (92-358)         |                           | 7 (3-13)                     |                                   |
| 2012 | Malawi     | 1556 (1103-1622)          |                                | 57 (40-59)                        |                                        | 339 (165-650)              |                                 | 12 (6-24)                          |                                         | 107 (52-204)         |                           | 4 (2-7)                      |                                   |
| 2013 | Malawi     | 1327 (941-1383)           |                                | 47 (34-49)                        |                                        | 289 (123-573)              |                                 | 10 (4-20)                          |                                         | 258 (110-511)        |                           | 9 (4-18)                     |                                   |
| 2014 | Malawi     | 1177 (835-1227)           |                                | 41 (29-43)                        |                                        | 270 (115-536)              |                                 | 9 (4-19)                           |                                         | 240 (103-477)        |                           | 8 (4-17)                     |                                   |
| 2015 | Malawi     | 1076 (763-1121)           | 233 (165-243)                  | 37 (26-39)                        | 8 (6-8)                                | 246 (107-490)              | 53 (23-106)                     | 8 (4-17)                           | 2 (1-4)                                 | 219 (95-436)         | 47 (21-94)                | 8 (3-15)                     | 2 (1-3)                           |
| 2000 | Malaysia   | 141 (100-147)             |                                | 5 (4-5)                           |                                        | 39 (23-54)                 |                                 | 1 (1-2)                            |                                         | 35 (21-48)           |                           | 1 (1-2)                      |                                   |
| 2001 | Malaysia   | 122 (86-127)              |                                | 5 (3-5)                           |                                        | 34 (20-47)                 |                                 | 1 (1-2)                            |                                         | 30 (18-42)           |                           | 1 (1-2)                      |                                   |
| 2002 | Malaysia   | 110 (78-114)              |                                | 4 (3-4)                           |                                        | 31 (18-42)                 |                                 | 1 (1-2)                            |                                         | 27 (16-38)           |                           | 1 (1-1)                      |                                   |
| 2003 | Malaysia   | 99 (70-103)               |                                | 4 (3-4)                           |                                        | 28 (17-38)                 |                                 | 1 (1-1)                            |                                         | 25 (15-34)           |                           | 1 (1-1)                      |                                   |
| 2004 | Malaysia   | 99 (70-103)               |                                | 4 (3-4)                           |                                        | 40 (24-55)                 |                                 | 2 (1-2)                            |                                         | 35 (21-49)           |                           | 1 (1-2)                      |                                   |
| 2005 | Malaysia   | 97 (69-101)               |                                | 4 (3-4)                           |                                        | 40 (24-55)                 |                                 | 2 (1-2)                            |                                         | 36 (21-49)           |                           | 1 (1-2)                      |                                   |
| 2006 | Malaysia   | 89 (63-93)                |                                | 4 (3-4)                           |                                        | 37 (22-51)                 |                                 | 2 (1-2)                            |                                         | 33 (20-46)           |                           | 1 (1-2)                      |                                   |
| 2007 | Malaysia   | 80 (57-83)                |                                | 3 (2-3)                           |                                        | 33 (20-46)                 |                                 | 1 (1-2)                            |                                         | 30 (18-41)           |                           | 1 (1-2)                      |                                   |
| 2008 | Malaysia   | 74 (53-78)                |                                | 3 (2-3)                           |                                        | 31 (19-43)                 |                                 | 1 (1-2)                            |                                         | 28 (17-38)           |                           | 1 (1-2)                      |                                   |
| 2009 | Malaysia   | 76 (54-79)                |                                | 3 (2-3)                           |                                        | 31 (19-43)                 |                                 | 1 (1-2)                            |                                         | 28 (17-39)           |                           | 1 (1-2)                      |                                   |
| 2010 | Malaysia   | 75 (53-78)                |                                | 3 (2-3)                           |                                        | 31 (19-43)                 |                                 | 1 (1-2)                            |                                         | 28 (17-38)           |                           | 1 (1-2)                      |                                   |
| 2011 | Malaysia   | 76 (54-79)                |                                | 3 (2-4)                           |                                        | 31 (19-43)                 |                                 | 1 (1-2)                            |                                         | 28 (17-38)           |                           | 1 (1-2)                      |                                   |
| 2012 | Malaysia   | 75 (53-78)                |                                | 3 (2-3)                           |                                        | 30 (18-42)                 |                                 | 1 (1-2)                            |                                         | 27 (16-37)           |                           | 1 (1-2)                      |                                   |
| 2013 | Malaysia   | 73 (52-76)                |                                | 3 (2-3)                           |                                        | 29 (18-40)                 |                                 | 1 (1-2)                            |                                         | 26 (16-36)           |                           | 1 (1-2)                      |                                   |
| 2014 | Malaysia   | 70 (50-73)                |                                | 3 (2-3)                           |                                        | 28 (17-38)                 |                                 | 1 (1-2)                            |                                         | 25 (15-34)           |                           | 1 (1-1)                      |                                   |
| 2015 | Malaysia   | 69 (49-72)                | 0 (0-0)                        | 3 (2-3)                           | 0 (0-0)                                | 27 (16-37)                 | 0 (0-0)                         | 1 (1-2)                            | 0 (0-0)                                 | 24 (14-33)           | 0 (0-0)                   | 1 (1-1)                      | 0 (0-0)                           |
| 2000 | Maldives   | 12 (8-12)                 |                                | 37 (26-38)                        |                                        | 1 (0-2)                    |                                 | 3 (1-7)                            |                                         | 1 (0-2)              |                           | 3 (1-7)                      |                                   |
| 2001 | Maldives   | 9 (7-10)                  |                                | 30 (22-32)                        |                                        | 1 (0-2)                    |                                 | 3 (1-6)                            |                                         | 1 (0-2)              |                           | 2 (1-6)                      |                                   |
| 2002 | Maldives   | 7 (5-8)                   |                                | 24 (17-25)                        |                                        | 1 (0-2)                    |                                 | 2 (1-5)                            |                                         | 1 (0-1)              |                           | 2 (0-5)                      |                                   |
| 2003 | Maldives   | 6 (4-6)                   |                                | 21 (15-21)                        |                                        | 1 (0-2)                    |                                 | 2 (0-5)                            |                                         | 0 (0-1)              |                           | 2 (0-5)                      |                                   |
| 2004 | Maldives   | 5 (4-5)                   |                                | 17 (12-18)                        |                                        | 0 (0-1)                    |                                 | 2 (0-4)                            |                                         | 0 (0-1)              |                           | 1 (0-4)                      |                                   |
| 2005 | Maldives   | 4 (3-4)                   |                                | 14 (10-15)                        |                                        | 0 (0-1)                    |                                 | 1 (0-4)                            |                                         | 0 (0-1)              |                           | 1 (0-3)                      |                                   |
| 2006 | Maldives   | 4 (3-4)                   |                                | 12 (8-13)                         |                                        | 0 (0-1)                    |                                 | 1 (0-3)                            |                                         | 0 (0-1)              |                           | 1 (0-3)                      |                                   |
| 2007 | Maldives   | 3 (2-3)                   |                                | 11 (7-11)                         |                                        | 0 (0-1)                    |                                 | 1 (0-3)                            |                                         | 0 (0-1)              |                           | 1 (0-2)                      |                                   |
| 2008 | Maldives   | 3 (2-3)                   |                                | 9 (7-10)                          |                                        | 0 (0-1)                    |                                 | 1 (0-2)                            |                                         | 0 (0-1)              |                           | 1 (0-2)                      |                                   |
| 2009 | Maldives   | 3 (2-3)                   |                                | 8 (6-8)                           |                                        | 0 (0-1)                    |                                 | 1 (0-2)                            |                                         | 0 (0-1)              |                           | 1 (0-2)                      |                                   |
| 2010 | Maldives   | 2 (2-2)                   |                                | 7 (5-7)                           |                                        | 0 (0-1)                    |                                 | 1 (0-2)                            |                                         | 0 (0-1)              |                           | 1 (0-2)                      |                                   |
| 2011 | Maldives   | 2 (1-2)                   |                                | 6 (4-6)                           |                                        | 0 (0-1)                    |                                 | 1 (0-4)                            |                                         | 0 (0-1)              |                           | 0 (0-1)                      |                                   |
| 2012 | Maldives   | 2 (1-2)                   |                                | 5 (4-5)                           |                                        | 0 (0-0)                    |                                 | 0 (0-1)                            |                                         | 0 (0-0)              |                           | 0 (0-1)                      |                                   |
| 2013 | Maldives   | 2 (1-2)                   |                                | 5 (3-5)                           |                                        | 0 (0-1)                    |                                 | 1 (0-2)                            |                                         | 0 (0-1)              |                           | 1 (0-2)                      |                                   |
| 2014 | Maldives   | 2 (1-2)                   |                                | 5 (3-5)                           |                                        | 0 (0-1)                    |                                 | 1 (0-2)                            |                                         | 0 (0-1)              |                           | 1 (0-2)                      |                                   |
| 2015 | Maldives   | 2 (1-2)                   | 0 (0-0)                        | 4 (3-4)                           | 0 (0-0)                                | 0 (0-1)                    | 0 (0-0)                         | 1 (0-2)                            | 0 (0-0)                                 | 0 (0-1)              | 0 (0-0)                   | 1 (0-2)                      | 0 (0-0)                           |
| 2000 | Mali       | 5390 (3822-5617)          |                                | 263 (187-274)                     |                                        | 996 (532-1882)             |                                 | 49 (26-92)                         |                                         | 313 (167-592)        |                           | 15 (8-29)                    |                                   |
| 2001 | Mali       | 5389 (3822-5616)          |                                | 254 (180-265)                     |                                        | 987 (528-1863)             |                                 | 47 (25-89)                         |                                         | 310 (166-596)        |                           | 15 (8-28)                    |                                   |
| 2002 | Mali       | 5284 (3754-5517)          |                                | 242 (172-252)                     |                                        | 963 (516-1816)             |                                 | 44 (24-83)                         |                                         | 303 (152-571)        |                           | 14 (7-26)                    |                                   |
| 2003 | Mali       |                           |                                |                                   |                                        |                            |                                 |                                    |                                         |                      |                           |                              |                                   |

| Year | Country          | Spn pneumonia deaths (UR) | Spn pneumonia deaths, HIV (UR) | Spn pneumonia mortality rate (UR) | Spn pneumonia mortality rate, HIV (UR) | Spn meningitis deaths (UR) | Spn meningitis deaths, HIV (UR) | Spn meningitis mortality rate (UR) | Spn meningitis mortality rate, HIV (UR) | Spn NPNM deaths (UR) | Spn NPNM deaths, HIV (UR) | Spn NPNM mortality rate (UR) | Spn NPNM mortality rate, HIV (UR) |
|------|------------------|---------------------------|--------------------------------|-----------------------------------|----------------------------------------|----------------------------|---------------------------------|------------------------------------|-----------------------------------------|----------------------|---------------------------|------------------------------|-----------------------------------|
| 2007 | Mali             | 5314 (3768-5538)          |                                | 204 (145-213)                     |                                        | 940 (513-1772)             |                                 | 36 (20-68)                         |                                         | 295 (161-557)        |                           | 11 (6-21)                    |                                   |
| 2008 | Mali             | 5316 (3770-5540)          |                                | 197 (140-206)                     |                                        | 932 (511-2012)             |                                 | 35 (13-75)                         |                                         | 293 (110-633)        |                           | 11 (4-23)                    |                                   |
| 2009 | Mali             | 5468 (3877-5698)          |                                | 197 (139-205)                     |                                        | 953 (363-2061)             |                                 | 34 (13-74)                         |                                         | 300 (114-648)        |                           | 11 (4-23)                    |                                   |
| 2010 | Mali             | 5360 (3801-5586)          |                                | 187 (133-195)                     |                                        | 932 (359-2015)             |                                 | 33 (13-70)                         |                                         | 293 (113-633)        |                           | 10 (4-22)                    |                                   |
| 2011 | Mali             | 4115 (2918-4289)          |                                | 139 (99-145)                      |                                        | 690 (268-1489)             |                                 | 23 (9-50)                          |                                         | 217 (84-488)         |                           | 7 (3-16)                     |                                   |
| 2012 | Mali             | 3274 (2322-3412)          |                                | 108 (77-112)                      |                                        | 545 (213-1173)             |                                 | 18 (7-39)                          |                                         | 171 (67-369)         |                           | 6 (2-12)                     |                                   |
| 2013 | Mali             | 2819 (1999-2938)          |                                | 91 (65-95)                        |                                        | 480 (189-1030)             |                                 | 16 (6-33)                          |                                         | 151 (60-324)         |                           | 5 (2-10)                     |                                   |
| 2014 | Mali             | 2463 (1746-2566)          |                                | 78 (55-81)                        |                                        | 423 (168-904)              |                                 | 13 (5-29)                          |                                         | 133 (53-284)         |                           | 4 (2-9)                      |                                   |
| 2015 | Mali             | 2597 (1841-2706)          | 220 (156-230)                  | 81 (57-84)                        | 7 (5-7)                                | 459 (184-978)              | 39 (16-83)                      | 14 (6-30)                          | 1 (0-3)                                 | 144 (58-308)         | 12 (5-26)                 | 4 (2-10)                     | 0 (0-1)                           |
| 2000 | Malta            | 0 (0-0)                   |                                | 0 (0-0)                           |                                        | 1 (0-1)                    |                                 | 3 (1-5)                            |                                         | 1 (0-1)              |                           | 3 (1-5)                      |                                   |
| 2001 | Malta            | 0 (0-0)                   |                                | 0 (0-0)                           |                                        | 0 (0-1)                    |                                 | 2 (1-4)                            |                                         | 0 (0-1)              |                           | 2 (1-3)                      |                                   |
| 2002 | Malta            | 0 (0-0)                   |                                | 0 (0-0)                           |                                        | 0 (0-0)                    |                                 | 0 (0-0)                            |                                         | 0 (0-0)              |                           | 0 (0-0)                      |                                   |
| 2003 | Malta            | 0 (0-0)                   |                                | 0 (0-0)                           |                                        | 0 (0-0)                    |                                 | 0 (0-0)                            |                                         | 0 (0-0)              |                           | 0 (0-0)                      |                                   |
| 2004 | Malta            | 0 (0-0)                   |                                | 2 (1-2)                           |                                        | 0 (0-0)                    |                                 | 1 (0-1)                            |                                         | 0 (0-0)              |                           | 0 (0-1)                      |                                   |
| 2005 | Malta            | 0 (0-0)                   |                                | 2 (1-2)                           |                                        | 0 (0-0)                    |                                 | 1 (0-1)                            |                                         | 0 (0-0)              |                           | 0 (0-1)                      |                                   |
| 2006 | Malta            | 0 (0-0)                   |                                | 2 (1-2)                           |                                        | 0 (0-0)                    |                                 | 1 (0-1)                            |                                         | 0 (0-0)              |                           | 1 (0-1)                      |                                   |
| 2007 | Malta            | 0 (0-0)                   |                                | 0 (0-0)                           |                                        | 0 (0-0)                    |                                 | 0 (0-0)                            |                                         | 0 (0-0)              |                           | 0 (0-0)                      |                                   |
| 2008 | Malta            | 0 (0-0)                   |                                | 0 (0-0)                           |                                        | 0 (0-0)                    |                                 | 1 (0-1)                            |                                         | 0 (0-0)              |                           | 1 (0-1)                      |                                   |
| 2009 | Malta            | 0 (0-0)                   |                                | 1 (0-1)                           |                                        | 0 (0-0)                    |                                 | 1 (1-2)                            |                                         | 0 (0-0)              |                           | 1 (0-2)                      |                                   |
| 2010 | Malta            | 0 (0-0)                   |                                | 0 (0-0)                           |                                        | 1 (0-1)                    |                                 | 3 (1-5)                            |                                         | 0 (0-1)              |                           | 2 (1-4)                      |                                   |
| 2011 | Malta            | 0 (0-0)                   |                                | 1 (1-1)                           |                                        | 0 (0-1)                    |                                 | 2 (1-4)                            |                                         | 0 (0-1)              |                           | 2 (1-3)                      |                                   |
| 2012 | Malta            | 0 (0-0)                   |                                | 1 (1-1)                           |                                        | 0 (0-1)                    |                                 | 2 (1-4)                            |                                         | 0 (0-1)              |                           | 2 (1-4)                      |                                   |
| 2013 | Malta            | 0 (0-0)                   |                                | 2 (1-2)                           |                                        | 0 (0-0)                    |                                 | 1 (1-2)                            |                                         | 0 (0-0)              |                           | 1 (1-2)                      |                                   |
| 2014 | Malta            | 0 (0-0)                   |                                | 1 (1-1)                           |                                        | 0 (0-1)                    |                                 | 2 (1-4)                            |                                         | 0 (0-1)              |                           | 2 (1-3)                      |                                   |
| 2015 | Malta            | 0 (0-0)                   | 0 (0-0)                        | 0 (0-0)                           | 0 (0-0)                                | 0 (0-1)                    | 0 (0-0)                         | 2 (1-4)                            | 0 (0-0)                                 | 0 (0-1)              | 0 (0-0)                   | 2 (1-3)                      | 0 (0-0)                           |
| 2000 | Marshall Islands | 5 (3-5)                   |                                | 44 (31-45)                        |                                        | 0 (0-1)                    |                                 | 0 (0-1)                            |                                         | 0 (0-1)              |                           | 2 (1-8)                      |                                   |
| 2001 | Marshall Islands | 5 (3-5)                   |                                | 44 (31-45)                        |                                        | 0 (0-1)                    |                                 | 3 (1-9)                            |                                         | 0 (0-1)              |                           | 2 (1-8)                      |                                   |
| 2002 | Marshall Islands | 5 (3-5)                   |                                | 45 (32-47)                        |                                        | 0 (0-1)                    |                                 | 3 (1-9)                            |                                         | 0 (0-1)              |                           | 2 (1-8)                      |                                   |
| 2003 | Marshall Islands | 4 (3-5)                   |                                | 44 (31-46)                        |                                        | 0 (0-1)                    |                                 | 3 (1-9)                            |                                         | 0 (0-1)              |                           | 2 (1-8)                      |                                   |
| 2004 | Marshall Islands | 4 (3-5)                   |                                | 45 (32-47)                        |                                        | 0 (0-1)                    |                                 | 3 (1-9)                            |                                         | 0 (0-1)              |                           | 2 (1-8)                      |                                   |
| 2005 | Marshall Islands | 4 (3-4)                   |                                | 45 (32-47)                        |                                        | 0 (0-1)                    |                                 | 3 (1-9)                            |                                         | 0 (0-1)              |                           | 2 (1-8)                      |                                   |
| 2006 | Marshall Islands | 4 (3-4)                   |                                | 46 (33-48)                        |                                        | 0 (0-1)                    |                                 | 3 (1-9)                            |                                         | 0 (0-1)              |                           | 2 (1-8)                      |                                   |
| 2007 | Marshall Islands | 4 (3-4)                   |                                | 47 (33-49)                        |                                        | 0 (0-1)                    |                                 | 3 (1-9)                            |                                         | 0 (0-1)              |                           | 3 (1-8)                      |                                   |
| 2008 | Marshall Islands | 4 (3-4)                   |                                | 47 (33-49)                        |                                        | 0 (0-1)                    |                                 | 3 (1-9)                            |                                         | 0 (0-1)              |                           | 2 (1-8)                      |                                   |
| 2009 | Marshall Islands | 3 (2-3)                   |                                | 38 (27-39)                        |                                        | 0 (0-1)                    |                                 | 2 (1-8)                            |                                         | 0 (0-1)              |                           | 2 (1-7)                      |                                   |
| 2010 | Marshall Islands | 3 (2-3)                   |                                | 41 (29-43)                        |                                        | 0 (0-1)                    |                                 | 2 (1-8)                            |                                         | 0 (0-1)              |                           | 2 (1-7)                      |                                   |
| 2011 | Marshall Islands | 3 (2-3)                   |                                | 37 (26-38)                        |                                        | 0 (0-1)                    |                                 | 2 (1-7)                            |                                         | 0 (0-0)              |                           | 2 (1-8)                      |                                   |
| 2012 | Marshall Islands | 2 (2-3)                   |                                | 33 (24-35)                        |                                        | 0 (0-0)                    |                                 | 2 (1-7)                            |                                         | 0 (0-0)              |                           | 2 (1-6)                      |                                   |
| 2013 | Marshall Islands | 3 (2-3)                   |                                | 36 (25-37)                        |                                        | 0 (0-0)                    |                                 | 2 (1-7)                            |                                         | 0 (0-0)              |                           | 2 (1-6)                      |                                   |
| 2014 | Marshall Islands | 3 (2-3)                   |                                | 37 (26-39)                        |                                        | 0 (0-0)                    |                                 | 2 (1-7)                            |                                         | 0 (0-0)              |                           | 2 (1-6)                      |                                   |
| 2015 | Marshall Islands | 1 (1-1)                   | 0 (0-0)                        | 11 (8-11)                         | 0 (0-0)                                | 0 (0-0)                    | 0 (0-0)                         | 1 (0-3)                            | 0 (0-0)                                 | 0 (0-0)              | 0 (0-0)                   | 1 (0-3)                      | 0 (0-0)                           |
| 2000 | Mauritania       | 631 (447-857)             |                                | 144 (102-150)                     |                                        | 94 (36-204)                |                                 | 21 (8-47)                          |                                         | 30 (11-64)           |                           | 7 (3-15)                     |                                   |
| 2001 | Mauritania       | 655 (464-882)             |                                | 146 (103-152)                     |                                        | 98 (37-212)                |                                 | 22 (8-47)                          |                                         | 31 (12-67)           |                           | 7 (3-15)                     |                                   |
| 2002 | Mauritania       | 679 (481-707)             |                                | 147 (104-153)                     |                                        | 102 (39-220)               |                                 | 22 (8-48)                          |                                         | 32 (12-69)           |                           | 7 (3-15)                     |                                   |
| 2003 | Mauritania       | 698 (495-728)             |                                | 148 (105-154)                     |                                        | 105 (41-226)               |                                 | 22 (9-48)                          |                                         | 33 (13-71)           |                           | 7 (3-15)                     |                                   |
| 2004 | Mauritania       | 711 (504-741)             |                                | 147 (104-153)                     |                                        | 106 (41-228)               |                                 | 22 (9-47)                          |                                         | 33 (13-72)           |                           | 7 (3-15)                     |                                   |
| 2005 | Mauritania       | 719 (510-749)             |                                | 146 (103-152)                     |                                        | 106 (42-228)               |                                 | 22 (8-46)                          |                                         | 33 (13-72)           |                           | 7 (3-15)                     |                                   |
| 2006 | Mauritania       | 723 (513-754)             |                                | 143 (101-149)                     |                                        | 107 (42-229)               |                                 | 21 (8-45)                          |                                         | 33 (13-72)           |                           | 7 (3-14)                     |                                   |
| 2007 | Mauritania       | 724 (513-755)             |                                | 140 (99-146)                      |                                        | 106 (42-228)               |                                 | 21 (8-44)                          |                                         | 33 (13-72)           |                           | 6 (3-14)                     |                                   |
| 2008 | Mauritania       | 720 (510-750)             |                                | 137 (97-143)                      |                                        | 106 (42-227)               |                                 | 20 (8-43)                          |                                         | 33 (13-71)           |                           | 6 (2-14)                     |                                   |
| 2009 | Mauritania       | 712 (505-742)             |                                | 133 (94-139)                      |                                        | 105 (41-226)               |                                 | 20 (8-42)                          |                                         | 33 (13-71)           |                           | 6 (2-13)                     |                                   |
| 2010 | Mauritania       | 707 (502-737)             |                                | 130 (92-135)                      |                                        | 105 (41-225)               |                                 | 19 (8-41)                          |                                         | 33 (13-71)           |                           | 6 (2-13)                     |                                   |
| 2011 | Mauritania       | 704 (500-734)             |                                | 127 (90-132)                      |                                        | 104 (41-224)               |                                 | 19 (7-40)                          |                                         | 33 (13-71)           |                           | 6 (2-13)                     |                                   |
| 2012 | Mauritania       | 693 (491-722)             |                                | 123 (87-128)                      |                                        | 102 (40-219)               |                                 | 18 (7-39)                          |                                         | 32 (13-69)           |                           | 6 (2-12)                     |                                   |
| 2013 | Mauritania       | 682 (483-710)             |                                | 119 (84-124)                      |                                        | 100 (39-214)               |                                 | 17 (7-37)                          |                                         | 31 (12-67)           |                           | 5 (2-12)                     |                                   |
| 2014 | Mauritania       | 494 (351-515)             |                                | 85 (60-88)                        |                                        | 68 (27-146)                |                                 | 12 (5-25)                          |                                         | 21 (8-46)            |                           | 4 (1-8)                      |                                   |
| 2015 | Mauritania       | 427 (303-445)             | 21 (15-22)                     | 72 (51-75)                        | 4 (3-4)                                | 58 (23-125)                | 3 (1-6)                         | 10 (4-21)                          | 0 (0-1)                                 | 18 (7-39)            | 1 (0-2)                   | 3 (1-7)                      | 0 (0-0)                           |
| 2000 | Mauritius        | 4 (3-4)                   |                                | 4 (2-4)                           |                                        | 3 (2-3)                    |                                 | 3 (2-4)                            |                                         | 2 (1-3)              |                           | 2 (1-3)                      |                                   |
| 2001 | Mauritius        | 6 (4-6)                   |                                | 6 (4-6)                           |                                        | 3 (2-4)                    |                                 | 3 (2-4)                            |                                         | 2 (2-3)              |                           | 3 (2-4)                      |                                   |
| 2002 | Mauritius        | 4 (3-4)                   |                                | 5 (3-5)                           |                                        | 1 (1-1)                    |                                 | 1 (1-2)                            |                                         | 1 (1-1)              |                           | 1 (1-1)                      |                                   |
| 2003 | Mauritius        | 7 (5-7)                   |                                | 7 (5-8)                           |                                        | 2 (1-2)                    |                                 | 2 (1-2)                            |                                         | 1 (1-2)              |                           | 2 (1-2)                      |                                   |
| 2004 | Mauritius        | 7 (5-7)                   |                                | 8 (5-8)                           |                                        | 2 (1-3)                    |                                 | 2 (1-3)                            |                                         | 2 (1-2)              |                           | 2 (1-2)                      |                                   |
| 2005 | Mauritius        | 5 (3-5)                   |                                | 5 (4-5)                           |                                        | 2 (1-3)                    |                                 | 2 (1-3)                            |                                         | 2 (1-2)              |                           | 2 (1-2)                      |                                   |
| 2006 | Mauritius        | 6 (5-7)                   |                                | 7 (5-7)                           |                                        | 6 (4-8)                    |                                 | 6 (4-8)                            |                                         | 5 (3-7)              |                           | 6 (3-7)                      |                                   |
| 2007 | Mauritius        | 8 (6-9)                   |                                | 9 (6-9)                           |                                        | 1 (1-1)                    |                                 | 1 (1-1)                            |                                         | 1 (1-1)              |                           | 1 (1-1)                      |                                   |
| 2008 | Mauritius        | 8 (5-8)                   |                                | 9 (6-9)                           |                                        | 3 (2-4)                    |                                 | 3 (2-4)                            |                                         | 3 (2-3)              |                           | 3 (2-4)                      |                                   |
| 2009 | Mauritius        | 6 (4-6)                   |                                | 7 (5-7)                           |                                        | 2 (2-3)                    |                                 | 3 (2-4)                            |                                         | 2 (1-3)              |                           | 3 (2-4)                      |                                   |
| 2010 | Mauritius        | 6 (4-6)                   |                                | 7 (5-7)                           |                                        | 2 (1-3)                    |                                 | 3 (2-4)                            |                                         | 2 (1-3)              |                           | 3 (2-4)                      |                                   |
| 2011 | Mauritius        | 6 (5-7)                   |                                | 9 (6-9)                           |                                        | 2 (1-2)                    |                                 | 2 (1-3)                            |                                         | 1 (1-2)              |                           | 2 (1-2)                      |                                   |
| 2012 | Mauritius        | 7 (5-7)                   |                                | 9 (6-9)                           |                                        | 0 (0-0)                    |                                 | 0 (0-0)                            |                                         | 0 (0-0)              |                           | 0 (0-0)                      |                                   |
| 2013 | Mauritius        | 8 (6-8)                   |                                | 11 (8-11)                         |                                        | 1 (1-1)                    |                                 | 1 (1-1)                            |                                         | 1 (1-1)              |                           | 1 (1-2)                      |                                   |
| 2014 | Mauritius        | 6 (5-7)                   |                                | 9 (6-9)                           |                                        | 1 (0-1)                    |                                 | 1 (1-1)                            |                                         | 1 (0-1)              |                           | 1 (1-1)                      |                                   |
| 2015 | Mauritius        | 6 (5-7)                   | 0 (0-0)                        | 9 (7-10)                          | 0 (0-0)                                | 1 (0-1)                    | 0 (0-0)                         | 1 (1-1)                            | 0 (0-0)                                 | 1 (0-1)              | 0 (0-0)                   | 1 (1-1)                      | 0 (0-0)                           |
| 2000 | Mexico           | 3758 (2664-3916)          |                                | 31 (22-33)                        |                                        | 561 (275-869)              |                                 | 5 (2-7)                            |                                         | 499 (245-774)        |                           | 4 (2-6)                      |                                   |
| 2001 | Mexico           | 3428 (2431-3572)          |                                | 29 (20-30)                        |                                        | 451 (222-699)              |                                 | 4 (2-6)                            |                                         | 402 (197-622)        |                           | 3 (2-5)                      |                                   |
| 2002 | Mexico           | 3486 (2472-3633)          |                                | 29 (21-30)                        |                                        | 400 (197-620)              |                                 | 3 (2-5)                            |                                         | 356 (175-552)        |                           | 3 (1-5)                      |                                   |
| 2003 | Mexico           | 2933 (2080-3057)          |                                | 25 (18-26)                        |                                        | 405 (199-628)              |                                 | 3 (2-5)                            |                                         | 361 (177-559)        |                           | 3 (1-5)                      |                                   |
| 2004 | Mexico           | 2953 (2094-3077)          |                                | 25 (18-26)                        |                                        | 374 (184-580)              |                                 | 3 (2-5)                            |                                         | 333 (164-518)        |                           | 3 (1-4)                      |                                   |
| 2005 | Mexico           | 2557 (1813-2665)          |                                | 22 (15-23)                        |                                        | 313 (154-486)              |                                 | 2 (1-4)                            |                                         | 279 (137-432)        |                           | 2 (1-4)                      |                                   |
| 2006 | Mexico           | 2428 (1722-2531)          |                                | 21 (15-22)                        |                                        | 338 (166-524)              |                                 | 3 (1-5)                            |                                         | 301 (148-467)        |                           | 3 (1-4)                      |                                   |
| 2007 | Mexico           | 2217 (1572-2310)          |                                | 19 (14-20)                        |                                        | 324 (159-502)              |                                 | 3 (1-4)                            |                                         | 289 (142-447)        |                           | 3 (1-4)                      |                                   |
| 2008 | Mexico           | 2065 (1464-2152)          |                                | 18 (13-19)                        |                                        | 300 (147-465)              |                                 | 3 (1-4)                            |                                         | 267 (131-414)        |                           | 2 (1-4)                      |                                   |
| 2009 | Mexico           | 1859 (1319-1937)          |                                | 16 (11-17)                        |                                        | 207 (101-320)              |                                 | 2 (1-3)                            |                                         | 184 (90-285)         |                           | 2 (1-2)                      |                                   |
| 2010 | Mexico           | 1180 (837-1230)           |                                | 10 (7-11)                         |                                        | 164 (80-254)               |                                 | 1 (1-2)                            |                                         | 146 (72-226)         |                           | 1 (1-2)                      |                                   |
| 2011 | Mexico           | 867 (615-904)             |                                | 8 (5-8)                           |                                        | 119 (58-185)               |                                 | 1 (1-2)                            |                                         | 106 (52-164)         |                           | 1 (0-1)                      |                                   |
| 2012 | Mexico           | 652 (462-680)             |                                | 6 (4-6)                           |                                        | 87 (43-134)                |                                 | 1 (0-1)                            |                                         | 77 (38-120)          |                           | 1 (0-1)                      |                                   |
| 2013 | Mexico           | 651 (461-678)             |                                | 6 (4-6)                           |                                        | 87 (43-134)                |                                 | 1 (0-1)                            |                                         | 77 (38-119)          |                           | 1 (0-1)                      |                                   |
| 2014 | Mexico           | 611 (433-637)             |                                | 5 (4-6)                           |                                        | 81 (40-126)                |                                 | 1 (0-1)                            |                                         | 72 (35-112)          |                           | 1 (0-1)                      |                                   |

Spn = *Streptococcus pneumoniae*; npnm = non-pneumonia, non-meningitis; HIV = deaths only in HIV-infected children; Uncertainty range provided in parentheses.



| Year | Country                          | Spn pneumonia deaths (UR) | Spn pneumonia deaths, HIV (UR) | Spn pneumonia mortality rate (UR) | Spn pneumonia mortality rate, HIV (UR) | Spn meningitis deaths (UR) | Spn meningitis deaths, HIV (UR) | Spn meningitis mortality rate (UR) | Spn meningitis mortality rate, HIV (UR) | Spn NPNM deaths (UR) | Spn NPNM deaths, HIV (UR) | Spn NPNM mortality rate (UR) | Spn NPNM mortality rate, HIV (UR) |
|------|----------------------------------|---------------------------|--------------------------------|-----------------------------------|----------------------------------------|----------------------------|---------------------------------|------------------------------------|-----------------------------------------|----------------------|---------------------------|------------------------------|-----------------------------------|
| 2015 | Mexico                           | 583 (413-802)             | 0 (0-0)                        | 5 (4-5)                           | 0 (0-0)                                | 77 (38-120)                | 0 (0-0)                         | 1 (0-1)                            | 0 (0-0)                                 | 69 (34-106)          | 0 (0-0)                   | 1 (0-1)                      | 0 (0-0)                           |
| 2000 | Micronesia (Federated States of) | 9 (7-10)                  |                                | 63 (45-66)                        |                                        | 1 (0-2)                    |                                 | 4 (1-13)                           |                                         | 1 (0-2)              |                           | 4 (1-12)                     |                                   |
| 2001 | Micronesia (Federated States of) | 9 (6-9)                   |                                | 61 (43-64)                        |                                        | 1 (0-2)                    |                                 | 4 (1-13)                           |                                         | 0 (0-2)              |                           | 3 (1-11)                     |                                   |
| 2002 | Micronesia (Federated States of) | 8 (6-9)                   |                                | 58 (41-61)                        |                                        | 1 (0-2)                    |                                 | 4 (1-12)                           |                                         | 0 (0-2)              |                           | 3 (1-11)                     |                                   |
| 2003 | Micronesia (Federated States of) | 8 (6-8)                   |                                | 57 (41-60)                        |                                        | 1 (0-2)                    |                                 | 4 (1-12)                           |                                         | 0 (0-1)              |                           | 3 (1-11)                     |                                   |
| 2004 | Micronesia (Federated States of) | 7 (5-8)                   |                                | 55 (39-57)                        |                                        | 0 (0-2)                    |                                 | 3 (1-11)                           |                                         | 0 (0-1)              |                           | 3 (1-10)                     |                                   |
| 2005 | Micronesia (Federated States of) | 7 (5-7)                   |                                | 53 (38-56)                        |                                        | 0 (0-1)                    |                                 | 3 (1-11)                           |                                         | 0 (0-1)              |                           | 3 (1-10)                     |                                   |
| 2006 | Micronesia (Federated States of) | 7 (5-7)                   |                                | 51 (36-53)                        |                                        | 0 (0-1)                    |                                 | 3 (1-10)                           |                                         | 0 (0-1)              |                           | 3 (1-9)                      |                                   |
| 2007 | Micronesia (Federated States of) | 6 (4-6)                   |                                | 49 (35-51)                        |                                        | 0 (0-1)                    |                                 | 3 (1-10)                           |                                         | 0 (0-1)              |                           | 3 (1-9)                      |                                   |
| 2008 | Micronesia (Federated States of) | 6 (4-6)                   |                                | 48 (34-50)                        |                                        | 0 (0-1)                    |                                 | 3 (1-10)                           |                                         | 0 (0-1)              |                           | 3 (1-9)                      |                                   |
| 2009 | Micronesia (Federated States of) | 6 (4-6)                   |                                | 46 (33-48)                        |                                        | 0 (0-1)                    |                                 | 3 (1-9)                            |                                         | 0 (0-1)              |                           | 3 (1-8)                      |                                   |
| 2010 | Micronesia (Federated States of) | 3 (2-3)                   |                                | 26 (18-27)                        |                                        | 0 (0-1)                    |                                 | 2 (1-8)                            |                                         | 0 (0-1)              |                           | 2 (0-6)                      |                                   |
| 2011 | Micronesia (Federated States of) | 3 (2-3)                   |                                | 26 (18-27)                        |                                        | 0 (0-1)                    |                                 | 2 (0-6)                            |                                         | 0 (0-1)              |                           | 2 (0-5)                      |                                   |
| 2012 | Micronesia (Federated States of) | 3 (2-3)                   |                                | 26 (19-28)                        |                                        | 0 (0-1)                    |                                 | 2 (0-5)                            |                                         | 0 (0-1)              |                           | 2 (0-5)                      |                                   |
| 2013 | Micronesia (Federated States of) | 3 (2-3)                   |                                | 25 (18-26)                        |                                        | 0 (0-1)                    |                                 | 2 (0-5)                            |                                         | 0 (0-1)              |                           | 1 (0-5)                      |                                   |
| 2014 | Micronesia (Federated States of) | 3 (2-3)                   |                                | 23 (17-24)                        |                                        | 0 (0-1)                    |                                 | 1 (0-5)                            |                                         | 0 (0-0)              |                           | 1 (0-4)                      |                                   |
| 2015 | Micronesia (Federated States of) | 1 (1-1)                   | 0 (0-0)                        | 10 (7-10)                         | 0 (0-0)                                | 0 (0-0)                    | 0 (0-0)                         | 1 (0-3)                            | 0 (0-0)                                 | 0 (0-0)              | 0 (0-0)                   | 1 (0-2)                      | 0 (0-0)                           |
| 2000 | Monaco                           | 0 (0-0)                   |                                | 0 (0-0)                           |                                        | 0 (0-0)                    |                                 | 0 (0-0)                            |                                         | 0 (0-0)              |                           | 0 (0-0)                      |                                   |
| 2001 | Monaco                           | 0 (0-0)                   |                                | 0 (0-0)                           |                                        | 0 (0-0)                    |                                 | 0 (0-0)                            |                                         | 0 (0-0)              |                           | 0 (0-0)                      |                                   |
| 2002 | Monaco                           | 0 (0-0)                   |                                | 0 (0-0)                           |                                        | 0 (0-0)                    |                                 | 0 (0-0)                            |                                         | 0 (0-0)              |                           | 0 (0-0)                      |                                   |
| 2003 | Monaco                           | 0 (0-0)                   |                                | 1 (1-1)                           |                                        | 0 (0-0)                    |                                 | 1 (0-1)                            |                                         | 0 (0-0)              |                           | 1 (0-1)                      |                                   |
| 2004 | Monaco                           | 0 (0-0)                   |                                | 1 (1-1)                           |                                        | 0 (0-0)                    |                                 | 1 (0-1)                            |                                         | 0 (0-0)              |                           | 0 (0-1)                      |                                   |
| 2005 | Monaco                           | 0 (0-0)                   |                                | 0 (0-0)                           |                                        | 0 (0-0)                    |                                 | 0 (0-0)                            |                                         | 0 (0-0)              |                           | 0 (0-0)                      |                                   |
| 2006 | Monaco                           | 0 (0-0)                   |                                | 0 (0-0)                           |                                        | 0 (0-0)                    |                                 | 0 (0-0)                            |                                         | 0 (0-0)              |                           | 0 (0-0)                      |                                   |
| 2007 | Monaco                           | 0 (0-0)                   |                                | 0 (0-0)                           |                                        | 0 (0-0)                    |                                 | 0 (0-0)                            |                                         | 0 (0-0)              |                           | 0 (0-0)                      |                                   |
| 2008 | Monaco                           | 0 (0-0)                   |                                | 2 (1-2)                           |                                        | 0 (0-0)                    |                                 | 1 (0-2)                            |                                         | 0 (0-0)              |                           | 1 (0-2)                      |                                   |
| 2009 | Monaco                           | 0 (0-0)                   |                                | 3 (2-3)                           |                                        | 0 (0-0)                    |                                 | 1 (1-2)                            |                                         | 0 (0-0)              |                           | 1 (1-2)                      |                                   |
| 2010 | Monaco                           | 0 (0-0)                   |                                | 2 (2-3)                           |                                        | 0 (0-0)                    |                                 | 1 (1-2)                            |                                         | 0 (0-0)              |                           | 1 (0-2)                      |                                   |
| 2011 | Monaco                           | 0 (0-0)                   |                                | 2 (1-2)                           |                                        | 0 (0-0)                    |                                 | 1 (0-1)                            |                                         | 0 (0-0)              |                           | 1 (0-1)                      |                                   |
| 2012 | Monaco                           | 0 (0-0)                   |                                | 0 (0-0)                           |                                        | 0 (0-0)                    |                                 | 0 (0-0)                            |                                         | 0 (0-0)              |                           | 0 (0-0)                      |                                   |
| 2013 | Monaco                           | 0 (0-0)                   |                                | 0 (0-0)                           |                                        | 0 (0-0)                    |                                 | 0 (0-0)                            |                                         | 0 (0-0)              |                           | 0 (0-0)                      |                                   |
| 2014 | Monaco                           | 0 (0-0)                   |                                | 1 (0-1)                           |                                        | 0 (0-0)                    |                                 | 0 (0-0)                            |                                         | 0 (0-0)              |                           | 0 (0-0)                      |                                   |
| 2015 | Monaco                           | 0 (0-0)                   | 0 (0-0)                        | 0 (0-0)                           | 0 (0-0)                                | 0 (0-0)                    | 0 (0-0)                         | 0 (0-0)                            | 0 (0-0)                                 | 0 (0-0)              | 0 (0-0)                   | 0 (0-0)                      | 0 (0-0)                           |
| 2000 | Mongolia                         | 179 (127-186)             |                                | 78 (55-81)                        |                                        | 25 (12-49)                 |                                 | 11 (5-21)                          |                                         | 22 (10-44)           |                           | 10 (5-19)                    |                                   |
| 2001 | Mongolia                         | 160 (113-166)             |                                | 71 (50-74)                        |                                        | 22 (10-44)                 |                                 | 10 (4-20)                          |                                         | 20 (9-39)            |                           | 9 (4-17)                     |                                   |
| 2002 | Mongolia                         | 142 (101-148)             |                                | 64 (45-67)                        |                                        | 19 (8-39)                  |                                 | 9 (4-18)                           |                                         | 17 (7-35)            |                           | 8 (3-16)                     |                                   |
| 2003 | Mongolia                         | 129 (92-135)              |                                | 60 (42-62)                        |                                        | 17 (7-36)                  |                                 | 8 (3-16)                           |                                         | 15 (6-32)            |                           | 7 (3-15)                     |                                   |
| 2004 | Mongolia                         | 118 (84-123)              |                                | 55 (39-57)                        |                                        | 15 (6-32)                  |                                 | 7 (3-15)                           |                                         | 14 (5-29)            |                           | 6 (2-13)                     |                                   |
| 2005 | Mongolia                         | 110 (78-115)              |                                | 51 (36-53)                        |                                        | 14 (5-30)                  |                                 | 6 (2-14)                           |                                         | 13 (5-26)            |                           | 6 (2-12)                     |                                   |
| 2006 | Mongolia                         | 104 (74-109)              |                                | 47 (33-49)                        |                                        | 13 (5-27)                  |                                 | 6 (2-12)                           |                                         | 12 (5-24)            |                           | 5 (2-11)                     |                                   |
| 2007 | Mongolia                         | 101 (72-105)              |                                | 43 (31-45)                        |                                        | 13 (5-25)                  |                                 | 5 (2-11)                           |                                         | 11 (5-23)            |                           | 5 (2-10)                     |                                   |
| 2008 | Mongolia                         | 99 (70-103)               |                                | 40 (28-42)                        |                                        | 12 (6-24)                  |                                 | 5 (2-10)                           |                                         | 11 (5-22)            |                           | 4 (2-9)                      |                                   |
| 2009 | Mongolia                         | 98 (70-103)               |                                | 38 (27-39)                        |                                        | 13 (6-23)                  |                                 | 5 (2-9)                            |                                         | 11 (5-21)            |                           | 4 (2-8)                      |                                   |
| 2010 | Mongolia                         | 96 (68-100)               |                                | 35 (25-36)                        |                                        | 13 (6-22)                  |                                 | 5 (2-8)                            |                                         | 11 (6-20)            |                           | 4 (2-7)                      |                                   |
| 2011 | Mongolia                         | 94 (67-98)                |                                | 32 (23-33)                        |                                        | 13 (7-25)                  |                                 | 4 (2-8)                            |                                         | 11 (6-22)            |                           | 4 (2-7)                      |                                   |
| 2012 | Mongolia                         | 92 (65-96)                |                                | 30 (21-31)                        |                                        | 13 (6-23)                  |                                 | 4 (3-7)                            |                                         | 12 (8-20)            |                           | 4 (2-7)                      |                                   |
| 2013 | Mongolia                         | 88 (63-92)                |                                | 28 (20-29)                        |                                        | 14 (9-21)                  |                                 | 4 (3-7)                            |                                         | 12 (8-19)            |                           | 4 (3-6)                      |                                   |
| 2014 | Mongolia                         | 85 (60-88)                |                                | 26 (18-27)                        |                                        | 14 (9-20)                  |                                 | 4 (3-6)                            |                                         | 12 (8-18)            |                           | 4 (2-6)                      |                                   |
| 2015 | Mongolia                         | 81 (57-84)                | 0 (0-0)                        | 24 (17-25)                        | 0 (0-0)                                | 14 (8-19)                  | 0 (0-0)                         | 4 (3-6)                            | 0 (0-0)                                 | 12 (7-17)            | 0 (0-0)                   | 4 (2-5)                      | 0 (0-0)                           |
| 2000 | Montenegro                       | 0 (0-0)                   |                                | 1 (1-1)                           |                                        | 0 (0-0)                    |                                 | 0 (0-0)                            |                                         | 0 (0-0)              |                           | 0 (0-0)                      |                                   |
| 2001 | Montenegro                       | 0 (0-0)                   |                                | 1 (0-1)                           |                                        | 0 (0-0)                    |                                 | 0 (0-0)                            |                                         | 0 (0-0)              |                           | 0 (0-0)                      |                                   |
| 2002 | Montenegro                       | 0 (0-0)                   |                                | 1 (0-1)                           |                                        | 0 (0-1)                    |                                 | 0 (0-1)                            |                                         | 0 (0-0)              |                           | 0 (0-1)                      |                                   |
| 2003 | Montenegro                       | 0 (0-0)                   |                                | 0 (0-0)                           |                                        | 0 (0-1)                    |                                 | 0 (0-1)                            |                                         | 0 (0-0)              |                           | 0 (0-1)                      |                                   |
| 2004 | Montenegro                       | 0 (0-0)                   |                                | 1 (1-1)                           |                                        | 0 (0-1)                    |                                 | 1 (0-3)                            |                                         | 0 (0-1)              |                           | 1 (0-2)                      |                                   |
| 2005 | Montenegro                       | 1 (0-1)                   |                                | 2 (1-2)                           |                                        | 0 (0-1)                    |                                 | 0 (0-1)                            |                                         | 0 (0-0)              |                           | 0 (0-1)                      |                                   |
| 2006 | Montenegro                       | 1 (1-1)                   |                                | 3 (2-3)                           |                                        | 0 (0-1)                    |                                 | 1 (0-2)                            |                                         | 0 (0-1)              |                           | 1 (0-2)                      |                                   |
| 2007 | Montenegro                       | 1 (1-1)                   |                                | 3 (2-3)                           |                                        | 0 (0-0)                    |                                 | 0 (0-1)                            |                                         | 0 (0-0)              |                           | 0 (0-1)                      |                                   |
| 2008 | Montenegro                       | 1 (0-1)                   |                                | 2 (1-2)                           |                                        | 0 (0-0)                    |                                 | 0 (0-1)                            |                                         | 0 (0-0)              |                           | 0 (0-1)                      |                                   |
| 2009 | Montenegro                       | 0 (0-0)                   |                                | 0 (0-0)                           |                                        | 0 (0-1)                    |                                 | 1 (0-1)                            |                                         | 0 (0-1)              |                           | 0 (0-1)                      |                                   |
| 2010 | Montenegro                       | 0 (0-0)                   |                                | 1 (1-1)                           |                                        | 0 (0-0)                    |                                 | 0 (0-1)                            |                                         | 0 (0-0)              |                           | 0 (0-1)                      |                                   |
| 2011 | Montenegro                       | 0 (0-0)                   |                                | 1 (1-1)                           |                                        | 0 (0-0)                    |                                 | 0 (0-1)                            |                                         | 0 (0-0)              |                           | 0 (0-1)                      |                                   |
| 2012 | Montenegro                       | 0 (0-0)                   |                                | 1 (1-1)                           |                                        | 0 (0-0)                    |                                 | 0 (0-1)                            |                                         | 0 (0-0)              |                           | 0 (0-1)                      |                                   |
| 2013 | Montenegro                       | 0 (0-0)                   |                                | 1 (1-1)                           |                                        | 0 (0-0)                    |                                 | 0 (0-1)                            |                                         | 0 (0-0)              |                           | 0 (0-1)                      |                                   |
| 2014 | Montenegro                       | 0 (0-0)                   |                                | 1 (1-1)                           |                                        | 0 (0-0)                    |                                 | 0 (0-1)                            |                                         | 0 (0-0)              |                           | 0 (0-1)                      |                                   |
| 2015 | Montenegro                       | 0 (0-0)                   | 0 (0-0)                        | 1 (1-1)                           | 0 (0-0)                                | 0 (0-0)                    | 0 (0-0)                         | 0 (0-1)                            | 0 (0-0)                                 | 0 (0-0)              | 0 (0-0)                   | 0 (0-1)                      | 0 (0-0)                           |
| 2000 | Morocco                          | 1477 (1047-1539)          |                                | 49 (34-51)                        |                                        | 189 (58-434)               |                                 | 6 (2-14)                           |                                         | 169 (52-386)         |                           | 6 (2-13)                     |                                   |
| 2001 | Morocco                          | 1356 (961-1413)           |                                | 46 (32-48)                        |                                        | 172 (53-395)               |                                 | 6 (2-13)                           |                                         | 153 (47-351)         |                           | 5 (2-12)                     |                                   |
| 2002 | Morocco                          | 1249 (886-1302)           |                                | 43 (30-45)                        |                                        | 157 (49-359)               |                                 | 5 (2-12)                           |                                         | 140 (44-320)         |                           | 5 (1-11)                     |                                   |
| 2003 | Morocco                          | 1164 (826-1213)           |                                | 40 (29-42)                        |                                        | 145 (45-331)               |                                 | 5 (2-11)                           |                                         | 129 (40-294)         |                           | 4 (1-10)                     |                                   |
| 2004 | Morocco                          | 1095 (776-1141)           |                                | 38 (27-40)                        |                                        | 135 (42-307)               |                                 | 5 (1-11)                           |                                         | 121 (38-274)         |                           | 4 (1-10)                     |                                   |
| 2005 | Morocco                          | 1035 (734-1078)           |                                | 36 (26-38)                        |                                        | 127 (42-285)               |                                 | 4 (1-10)                           |                                         | 114 (37-254)         |                           | 4 (1-9)                      |                                   |
| 2006 | Morocco                          | 981 (696-1022)            |                                | 34 (24-36)                        |                                        | 120 (42-264)               |                                 | 4 (1-9)                            |                                         | 107 (37-235)         |                           | 4 (1-8)                      |                                   |
| 2007 | Morocco                          | 940 (667-980)             |                                | 32 (23-34)                        |                                        | 116 (42-248)               |                                 | 4 (1-9)                            |                                         | 103 (38-221)         |                           | 4 (1-8)                      |                                   |
| 2008 | Morocco                          | 902 (640-940)             |                                | 31 (22-32)                        |                                        | 111 (43-233)               |                                 | 4 (1-8)                            |                                         | 99 (38-207)          |                           | 3 (1-7)                      |                                   |
| 2009 | Morocco                          | 885 (628-922)             |                                | 29 (21-31)                        |                                        | 109 (45-224)               |                                 | 4 (2-7)                            |                                         | 97 (40-199)          |                           | 3 (1-7)                      |                                   |
| 2010 | Morocco                          | 862 (611-898)             |                                | 28 (20-29)                        |                                        | 107 (47-213)               |                                 | 3 (2-7)                            |                                         | 95 (42-190)          |                           | 3 (1-6)                      |                                   |
| 2011 | Morocco                          | 805 (571-839)             |                                | 25 (18-27)                        |                                        | 99 (44-196)                |                                 | 3 (1-6)                            |                                         | 88 (39-174)          |                           | 3 (1-6)                      |                                   |
| 2012 | Morocco                          | 609 (432-635)             |                                | 19 (13-20)                        |                                        | 72 (32-142)                |                                 | 2 (1-4)                            |                                         | 64 (28-126)          |                           | 2 (1-4)                      |                                   |
| 2013 | Morocco                          | 515 (365-537)             |                                | 16 (11-16)                        |                                        | 61 (21-143)                |                                 | 2 (1-4)                            |                                         | 54 (18-127)          |                           | 2 (1-4)                      |                                   |
| 2014 | Morocco                          | 340 (241-354)             |                                | 10 (7-11)                         |                                        | 39 (13-91)                 |                                 | 1 (0-3)                            |                                         | 35 (12-81)           |                           | 1 (0-2)                      |                                   |
| 2015 | Morocco                          | 288 (190-279)             | 1 (1-1)                        | 8 (6-8)                           | 0 (0-0)                                | 31 (11-73)                 | 0 (0-0)                         | 1 (0-2)                            | 0 (0-0)                                 | 28 (10-65)           | 0 (0-0)                   | 1 (0-2)                      | 0 (0-0)                           |
| 2000 | Mozambique                       | 5040 (3574-5252)          |                                | 154 (109-160)                     |                                        | 1233 (693-2213)            |                                 | 38 (21-68)                         |                                         | 388 (218-696)        |                           | 12 (7-21)                    |                                   |
| 2001 | Mozambique                       | 4978 (3531-5189)          |                                | 147 (104-153)                     |                                        | 1203 (686-2155)            |                                 | 36 (20-64)                         |                                         | 378 (216-677)        |                           | 11 (6-20)                    |                                   |
| 2002 | Mozambique                       | 4986 (3535-5196)          |                                | 143 (101-149)                     |                                        | 1187 (687-2124)            |                                 | 34 (20-61)                         |                                         | 373 (216-668)        |                           | 11 (6-19)                    |                                   |
| 2003 | Mozambique                       | 5027 (3565-5239)          |                                | 140 (99-146)                      |                                        | 1178 (688-2385)            |                                 | 33 (14-66)                         |                                         | 370 (157-750)        |                           | 10 (4-21)                    |                                   |
| 2004 | Mozambique                       | 5124 (3633-5340)          |                                | 139 (98-145)                      |                                        | 1183 (612-2388)            |                                 | 32 (14-65)                         |                                         | 372 (161-751)        |                           | 10 (4-20)                    |                                   |
| 2005 | Mozambique                       | 5231 (3709-5451)          |                                | 138 (98-144)                      |                                        | 1193 (628-2396)            |                                 | 31 (14-63)                         |                                         | 375 (166-753)        |                           | 10 (4-20)                    |                                   |
| 2006 | Mozambique                       | 5287 (3749-5509)          |                                | 135 (96-141)                      |                                        | 1193 (639-2380)            |                                 | 31 (14-61)                         |                                         | 375 (169-748)        |                           | 10 (4-19)                    |                                   |

Spn = *Streptococcus pneumoniae*; npnm = non-pneumonia, non-meningitis; HIV = deaths only in HIV-infected children; Uncertainty range provided in parentheses.

| Year | Country     | Spn pneumonia deaths (UR) | Spn pneumonia deaths, HIV (UR) | Spn pneumonia mortality rate (UR) | Spn pneumonia mortality rate, HIV (UR) | Spn meningitis deaths (UR) | Spn meningitis deaths, HIV (UR) | Spn meningitis mortality rate (UR) | Spn meningitis mortality rate, HIV (UR) | Spn NPNM deaths (UR) | Spn NPNM deaths, HIV (UR) | Spn NPNM mortality rate (UR) | Spn NPNM mortality rate, HIV (UR) |
|------|-------------|---------------------------|--------------------------------|-----------------------------------|----------------------------------------|----------------------------|---------------------------------|------------------------------------|-----------------------------------------|----------------------|---------------------------|------------------------------|-----------------------------------|
| 2007 | Mozambique  | 5277 (3742-5499)          |                                | 132 (84-137)                      |                                        | 1177 (643-2333)            |                                 | 29 (14-58)                         |                                         | 370 (171-733)        |                           | 9 (4-18)                     |                                   |
| 2008 | Mozambique  | 5207 (3693-5427)          |                                | 127 (90-133)                      |                                        | 1145 (642-2261)            |                                 | 28 (13-55)                         |                                         | 360 (170-711)        |                           | 9 (4-17)                     |                                   |
| 2009 | Mozambique  | 5082 (3604-5297)          |                                | 122 (86-127)                      |                                        | 1093 (492-2203)            |                                 | 26 (12-53)                         |                                         | 344 (155-693)        |                           | 8 (4-17)                     |                                   |
| 2010 | Mozambique  | 4967 (3522-5176)          |                                | 116 (82-121)                      |                                        | 1046 (449-2146)            |                                 | 24 (11-50)                         |                                         | 329 (141-675)        |                           | 8 (3-16)                     |                                   |
| 2011 | Mozambique  | 4844 (3435-5048)          |                                | 111 (79-115)                      |                                        | 996 (410-2087)             |                                 | 23 (9-48)                          |                                         | 313 (129-656)        |                           | 7 (3-15)                     |                                   |
| 2012 | Mozambique  | 4722 (3348-4921)          |                                | 106 (75-110)                      |                                        | 950 (376-2030)             |                                 | 21 (8-45)                          |                                         | 299 (118-638)        |                           | 7 (3-14)                     |                                   |
| 2013 | Mozambique  | 3927 (2784-4092)          |                                | 86 (61-90)                        |                                        | 759 (289-1649)             |                                 | 17 (6-36)                          |                                         | 239 (91-519)         |                           | 5 (2-11)                     |                                   |
| 2014 | Mozambique  | 3190 (2262-3325)          |                                | 69 (49-72)                        |                                        | 588 (219-1317)             |                                 | 13 (5-28)                          |                                         | 188 (69-414)         |                           | 4 (1-9)                      |                                   |
| 2015 | Mozambique  | 2793 (1980-2910)          | 1031 (731-1075)                | 59 (42-61)                        | 22 (15-23)                             | 526 (185-1174)             | 194 (68-433)                    | 11 (4-25)                          | 4 (1-9)                                 | 165 (58-369)         | 61 (22-136)               | 3 (1-8)                      | 1 (0-3)                           |
| 2000 | Myanmar     | 4718 (3346-4917)          |                                | 92 (65-96)                        |                                        | 964 (360-2084)             |                                 | 19 (7-41)                          |                                         | 303 (113-655)        |                           | 6 (2-13)                     |                                   |
| 2001 | Myanmar     | 4648 (3296-4844)          |                                | 89 (63-93)                        |                                        | 924 (365-1961)             |                                 | 18 (7-38)                          |                                         | 291 (115-617)        |                           | 6 (2-12)                     |                                   |
| 2002 | Myanmar     | 4563 (3236-4756)          |                                | 86 (61-90)                        |                                        | 884 (372-1839)             |                                 | 17 (7-35)                          |                                         | 278 (117-578)        |                           | 5 (2-11)                     |                                   |
| 2003 | Myanmar     | 4436 (3146-4623)          |                                | 83 (59-87)                        |                                        | 837 (376-1706)             |                                 | 16 (7-32)                          |                                         | 263 (118-536)        |                           | 5 (2-10)                     |                                   |
| 2004 | Myanmar     | 4265 (3024-4445)          |                                | 80 (57-83)                        |                                        | 783 (308-1632)             |                                 | 15 (6-31)                          |                                         | 697 (274-1453)       |                           | 13 (5-27)                    |                                   |
| 2005 | Myanmar     | 4075 (2890-4247)          |                                | 76 (54-80)                        |                                        | 727 (287-1509)             |                                 | 14 (5-28)                          |                                         | 647 (256-1343)       |                           | 12 (5-25)                    |                                   |
| 2006 | Myanmar     | 3862 (2738-4025)          |                                | 72 (51-75)                        |                                        | 670 (267-1387)             |                                 | 13 (5-26)                          |                                         | 597 (238-1235)       |                           | 11 (4-23)                    |                                   |
| 2007 | Myanmar     | 3619 (2566-3771)          |                                | 69 (49-71)                        |                                        | 615 (246-1268)             |                                 | 12 (5-24)                          |                                         | 547 (219-1129)       |                           | 10 (4-21)                    |                                   |
| 2008 | Myanmar     | 6132 (4348-6390)          |                                | 118 (84-123)                      |                                        | 1028 (472-2053)            |                                 | 20 (9-40)                          |                                         | 323 (148-645)        |                           | 6 (3-12)                     |                                   |
| 2009 | Myanmar     | 3151 (2234-3284)          |                                | 62 (44-65)                        |                                        | 522 (212-1070)             |                                 | 10 (4-21)                          |                                         | 465 (189-952)        |                           | 9 (4-19)                     |                                   |
| 2010 | Myanmar     | 2949 (2091-3073)          |                                | 59 (42-62)                        |                                        | 483 (196-989)              |                                 | 10 (4-20)                          |                                         | 430 (175-881)        |                           | 9 (4-18)                     |                                   |
| 2011 | Myanmar     | 2729 (1935-2844)          |                                | 57 (40-59)                        |                                        | 441 (181-903)              |                                 | 9 (4-19)                           |                                         | 393 (161-804)        |                           | 8 (3-17)                     |                                   |
| 2012 | Myanmar     | 2553 (1810-2660)          |                                | 54 (38-57)                        |                                        | 407 (168-832)              |                                 | 9 (4-18)                           |                                         | 363 (150-740)        |                           | 8 (3-16)                     |                                   |
| 2013 | Myanmar     | 2419 (1716-2521)          |                                | 52 (37-55)                        |                                        | 382 (159-779)              |                                 | 8 (3-17)                           |                                         | 341 (141-693)        |                           | 7 (3-15)                     |                                   |
| 2014 | Myanmar     | 2304 (1634-2401)          |                                | 51 (36-53)                        |                                        | 362 (151-735)              |                                 | 8 (3-16)                           |                                         | 322 (135-654)        |                           | 7 (3-14)                     |                                   |
| 2015 | Myanmar     | 2189 (1552-2282)          | 79 (56-82)                     | 49 (35-51)                        | 2 (1-2)                                | 342 (144-693)              | 12 (5-25)                       | 8 (3-15)                           | 0 (0-1)                                 | 304 (128-617)        | 11 (5-22)                 | 7 (3-14)                     | 0 (0-0)                           |
| 2000 | Namibia     | 191 (135-198)             |                                | 70 (50-73)                        |                                        | 23 (8-46)                  |                                 | 8 (3-17)                           |                                         | 7 (3-15)             |                           | 3 (1-5)                      |                                   |
| 2001 | Namibia     | 191 (135-199)             |                                | 70 (50-73)                        |                                        | 22 (10-46)                 |                                 | 8 (4-17)                           |                                         | 7 (3-15)             |                           | 3 (1-5)                      |                                   |
| 2002 | Namibia     | 191 (135-199)             |                                | 70 (50-73)                        |                                        | 22 (10-46)                 |                                 | 8 (4-17)                           |                                         | 7 (3-14)             |                           | 3 (1-5)                      |                                   |
| 2003 | Namibia     | 190 (135-198)             |                                | 70 (50-73)                        |                                        | 22 (10-45)                 |                                 | 8 (4-17)                           |                                         | 7 (3-14)             |                           | 3 (1-5)                      |                                   |
| 2004 | Namibia     | 190 (135-198)             |                                | 70 (49-73)                        |                                        | 22 (8-46)                  |                                 | 8 (3-17)                           |                                         | 19 (7-41)            |                           | 7 (3-15)                     |                                   |
| 2005 | Namibia     | 191 (135-199)             |                                | 70 (49-73)                        |                                        | 21 (8-45)                  |                                 | 8 (3-16)                           |                                         | 19 (7-40)            |                           | 7 (3-15)                     |                                   |
| 2006 | Namibia     | 190 (135-198)             |                                | 69 (49-72)                        |                                        | 21 (8-44)                  |                                 | 8 (3-16)                           |                                         | 19 (7-39)            |                           | 7 (3-14)                     |                                   |
| 2007 | Namibia     | 189 (134-197)             |                                | 69 (49-71)                        |                                        | 21 (8-44)                  |                                 | 8 (3-16)                           |                                         | 19 (7-39)            |                           | 7 (3-14)                     |                                   |
| 2008 | Namibia     | 190 (134-197)             |                                | 68 (48-71)                        |                                        | 21 (8-43)                  |                                 | 8 (3-16)                           |                                         | 19 (7-39)            |                           | 7 (3-14)                     |                                   |
| 2009 | Namibia     | 191 (136-199)             |                                | 67 (48-70)                        |                                        | 21 (9-44)                  |                                 | 7 (3-15)                           |                                         | 19 (8-39)            |                           | 7 (3-14)                     |                                   |
| 2010 | Namibia     | 194 (138-202)             |                                | 67 (47-70)                        |                                        | 21 (9-44)                  |                                 | 7 (3-15)                           |                                         | 19 (8-39)            |                           | 7 (3-13)                     |                                   |
| 2011 | Namibia     | 197 (140-205)             |                                | 66 (47-69)                        |                                        | 22 (9-44)                  |                                 | 7 (3-15)                           |                                         | 19 (8-39)            |                           | 6 (3-13)                     |                                   |
| 2012 | Namibia     | 201 (143-210)             |                                | 66 (47-69)                        |                                        | 22 (9-45)                  |                                 | 7 (3-15)                           |                                         | 20 (8-40)            |                           | 6 (3-13)                     |                                   |
| 2013 | Namibia     | 204 (145-213)             |                                | 65 (46-67)                        |                                        | 22 (10-45)                 |                                 | 7 (3-14)                           |                                         | 6 (20-13)            |                           | 6 (3-13)                     |                                   |
| 2014 | Namibia     | 206 (146-214)             |                                | 63 (45-66)                        |                                        | 22 (10-45)                 |                                 | 7 (3-14)                           |                                         | 20 (9-40)            |                           | 6 (3-12)                     |                                   |
| 2015 | Namibia     | 143 (102-149)             | 35 (25-37)                     | 43 (31-45)                        | 11 (8-11)                              | 15 (7-29)                  | 4 (2-7)                         | 4 (2-9)                            | 1 (0-2)                                 | 13 (6-26)            | 3 (1-6)                   | 4 (2-8)                      | 1 (0-2)                           |
| 2000 | Nauru       | 0 (0-0)                   |                                | 38 (27-39)                        |                                        | 0 (0-0)                    |                                 | 2 (1-6)                            |                                         | 0 (0-0)              |                           | 2 (1-5)                      |                                   |
| 2001 | Nauru       | 0 (0-0)                   |                                | 38 (27-40)                        |                                        | 0 (0-0)                    |                                 | 2 (1-6)                            |                                         | 0 (0-0)              |                           | 2 (1-5)                      |                                   |
| 2002 | Nauru       | 0 (0-0)                   |                                | 38 (27-40)                        |                                        | 0 (0-0)                    |                                 | 2 (1-6)                            |                                         | 0 (0-0)              |                           | 2 (1-5)                      |                                   |
| 2003 | Nauru       | 0 (0-0)                   |                                | 37 (26-39)                        |                                        | 0 (0-0)                    |                                 | 2 (1-6)                            |                                         | 0 (0-0)              |                           | 2 (1-6)                      |                                   |
| 2004 | Nauru       | 0 (0-0)                   |                                | 37 (26-38)                        |                                        | 0 (0-0)                    |                                 | 2 (1-6)                            |                                         | 0 (0-0)              |                           | 2 (1-6)                      |                                   |
| 2005 | Nauru       | 0 (0-0)                   |                                | 37 (26-38)                        |                                        | 0 (0-0)                    |                                 | 2 (1-7)                            |                                         | 0 (0-0)              |                           | 2 (1-6)                      |                                   |
| 2006 | Nauru       | 0 (0-0)                   |                                | 37 (27-39)                        |                                        | 0 (0-0)                    |                                 | 2 (1-7)                            |                                         | 0 (0-0)              |                           | 2 (1-6)                      |                                   |
| 2007 | Nauru       | 0 (0-0)                   |                                | 38 (27-40)                        |                                        | 0 (0-0)                    |                                 | 2 (1-7)                            |                                         | 0 (0-0)              |                           | 2 (1-6)                      |                                   |
| 2008 | Nauru       | 0 (0-0)                   |                                | 40 (28-41)                        |                                        | 0 (0-0)                    |                                 | 2 (1-7)                            |                                         | 0 (0-0)              |                           | 2 (1-7)                      |                                   |
| 2009 | Nauru       | 0 (0-0)                   |                                | 28 (20-29)                        |                                        | 0 (0-0)                    |                                 | 2 (0-5)                            |                                         | 0 (0-0)              |                           | 1 (0-4)                      |                                   |
| 2010 | Nauru       | 0 (0-0)                   |                                | 29 (20-30)                        |                                        | 0 (0-0)                    |                                 | 2 (1-5)                            |                                         | 0 (0-0)              |                           | 1 (0-5)                      |                                   |
| 2011 | Nauru       | 0 (0-0)                   |                                | 29 (21-30)                        |                                        | 0 (0-0)                    |                                 | 2 (1-5)                            |                                         | 0 (0-0)              |                           | 1 (0-5)                      |                                   |
| 2012 | Nauru       | 0 (0-0)                   |                                | 29 (21-31)                        |                                        | 0 (0-0)                    |                                 | 2 (1-5)                            |                                         | 0 (0-0)              |                           | 1 (0-5)                      |                                   |
| 2013 | Nauru       | 0 (0-0)                   |                                | 30 (21-31)                        |                                        | 0 (0-0)                    |                                 | 2 (1-5)                            |                                         | 0 (0-0)              |                           | 1 (0-5)                      |                                   |
| 2014 | Nauru       | 0 (0-0)                   |                                | 30 (21-31)                        |                                        | 0 (0-0)                    |                                 | 2 (1-5)                            |                                         | 0 (0-0)              |                           | 1 (0-5)                      |                                   |
| 2015 | Nauru       | 0 (0-0)                   | 0 (0-0)                        | 31 (22-32)                        | 0 (0-0)                                | 0 (0-0)                    | 0 (0-0)                         | 2 (1-5)                            | 0 (0-0)                                 | 0 (0-0)              | 0 (0-0)                   | 2 (0-5)                      | 0 (0-0)                           |
| 2000 | Nepal       | 3031 (2143-3159)          |                                | 66 (61-90)                        |                                        | 490 (153-1166)             |                                 | 14 (4-33)                          |                                         | 154 (48-367)         |                           | 4 (1-10)                     |                                   |
| 2001 | Nepal       | 2835 (2011-2955)          |                                | 80 (57-84)                        |                                        | 457 (147-1080)             |                                 | 13 (4-31)                          |                                         | 144 (46-340)         |                           | 4 (1-10)                     |                                   |
| 2002 | Nepal       | 2607 (1849-2717)          |                                | 74 (53-77)                        |                                        | 419 (113-1014)             |                                 | 12 (3-29)                          |                                         | 373 (101-903)        |                           | 11 (3-26)                    |                                   |
| 2003 | Nepal       | 2390 (1694-2490)          |                                | 69 (49-72)                        |                                        | 384 (107-921)              |                                 | 11 (3-26)                          |                                         | 342 (95-820)         |                           | 10 (3-24)                    |                                   |
| 2004 | Nepal       | 2171 (1540-2263)          |                                | 63 (45-66)                        |                                        | 349 (100-829)              |                                 | 10 (3-24)                          |                                         | 310 (89-738)         |                           | 9 (3-22)                     |                                   |
| 2005 | Nepal       | 1984 (1407-2068)          |                                | 59 (42-61)                        |                                        | 318 (94-749)               |                                 | 9 (3-22)                           |                                         | 283 (84-667)         |                           | 8 (2-20)                     |                                   |
| 2006 | Nepal       | 1802 (1276-1878)          |                                | 54 (39-57)                        |                                        | 289 (89-672)               |                                 | 9 (3-20)                           |                                         | 257 (79-599)         |                           | 8 (2-18)                     |                                   |
| 2007 | Nepal       | 1653 (1172-1723)          |                                | 51 (36-53)                        |                                        | 264 (82-611)               |                                 | 8 (3-19)                           |                                         | 235 (73-544)         |                           | 7 (2-17)                     |                                   |
| 2008 | Nepal       | 1509 (1070-1572)          |                                | 47 (33-49)                        |                                        | 240 (75-551)               |                                 | 7 (2-17)                           |                                         | 213 (67-491)         |                           | 7 (2-15)                     |                                   |
| 2009 | Nepal       | 1390 (985-1448)           |                                | 44 (31-46)                        |                                        | 220 (70-503)               |                                 | 7 (2-16)                           |                                         | 195 (62-448)         |                           | 6 (2-14)                     |                                   |
| 2010 | Nepal       | 1261 (894-1314)           |                                | 41 (29-42)                        |                                        | 198 (64-451)               |                                 | 6 (2-15)                           |                                         | 176 (57-402)         |                           | 6 (2-13)                     |                                   |
| 2011 | Nepal       | 1153 (818-1202)           |                                | 38 (27-40)                        |                                        | 180 (59-408)               |                                 | 6 (2-13)                           |                                         | 160 (53-364)         |                           | 5 (2-12)                     |                                   |
| 2012 | Nepal       | 1032 (732-1076)           |                                | 35 (25-36)                        |                                        | 160 (52-363)               |                                 | 5 (2-12)                           |                                         | 142 (47-323)         |                           | 5 (2-11)                     |                                   |
| 2013 | Nepal       | 941 (668-981)             |                                | 33 (23-34)                        |                                        | 145 (48-329)               |                                 | 5 (2-11)                           |                                         | 129 (42-293)         |                           | 4 (1-10)                     |                                   |
| 2014 | Nepal       | 869 (616-906)             |                                | 31 (22-32)                        |                                        | 134 (44-302)               |                                 | 5 (2-11)                           |                                         | 119 (39-269)         |                           | 4 (1-10)                     |                                   |
| 2015 | Nepal       | 691 (490-721)             | 6 (4-6)                        | 25 (18-26)                        | 0 (0-0)                                | 104 (34-235)               | 1 (0-2)                         | 4 (1-9)                            | 0 (0-0)                                 | 92 (30-209)          | 1 (0-2)                   | 3 (1-8)                      | 0 (0-0)                           |
| 2000 | Netherlands | 9 (7-10)                  |                                | 1 (1-1)                           |                                        | 12 (6-23)                  |                                 | 1 (1-2)                            |                                         | 11 (5-20)            |                           | 1 (1-2)                      |                                   |
| 2001 | Netherlands | 11 (7-11)                 |                                | 1 (1-1)                           |                                        | 12 (6-22)                  |                                 | 1 (1-2)                            |                                         | 11 (5-20)            |                           | 1 (1-2)                      |                                   |
| 2002 | Netherlands | 8 (5-8)                   |                                | 1 (1-1)                           |                                        | 12 (6-22)                  |                                 | 1 (1-2)                            |                                         | 11 (5-20)            |                           | 1 (1-2)                      |                                   |
| 2003 | Netherlands | 8 (6-8)                   |                                | 1 (1-1)                           |                                        | 11 (5-20)                  |                                 | 1 (1-2)                            |                                         | 10 (4-18)            |                           | 1 (1-2)                      |                                   |
| 2004 | Netherlands | 8 (6-9)                   |                                | 1 (1-1)                           |                                        | 4 (2-8)                    |                                 | 0 (0-1)                            |                                         | 4 (2-7)              |                           | 0 (0-1)                      |                                   |
| 2005 | Netherlands | 10 (7-10)                 |                                | 1 (1-1)                           |                                        | 9 (4-16)                   |                                 | 1 (0-2)                            |                                         | 8 (3-14)             |                           | 1 (0-1)                      |                                   |
| 2006 | Netherlands | 7 (5-7)                   |                                | 1 (0-1)                           |                                        | 4 (2-7)                    |                                 | 0 (0-1)                            |                                         | 3 (2-6)              |                           | 0 (0-1)                      |                                   |
| 2007 | Netherlands | 6 (4-6)                   |                                | 1 (0-1)                           |                                        | 6 (3-10)                   |                                 | 1 (0-1)                            |                                         | 5 (2-9)              |                           | 1 (0-1)                      |                                   |
| 2008 | Netherlands | 6 (4-6)                   |                                | 1 (0-1)                           |                                        | 4 (2-7)                    |                                 | 0 (0-1)                            |                                         | 4 (2-7)              |                           | 0 (0-1)                      |                                   |
| 2009 | Netherlands | 5 (4-5)                   |                                | 1 (0-1)                           |                                        | 4 (2-7)                    |                                 | 0 (0-1)                            |                                         | 4 (2-6)              |                           | 0 (0-1)                      |                                   |
| 2010 | Netherlands | 4 (3-4)                   |                                | 0 (0-0)                           |                                        | 3 (2-6)                    |                                 | 0 (0-1)                            |                                         | 3 (1-6)              |                           | 0 (0-1)                      |                                   |
| 2011 | Netherlands | 3 (2-3)                   |                                | 0 (0-0)                           |                                        | 3 (1-5)                    |                                 | 0 (0-1)                            |                                         | 2 (1-4)              |                           | 0 (0-0)                      |                                   |
| 2012 | Netherlands | 3 (2-3)                   |                                | 0 (0-0)                           |                                        | 1 (1-3)                    |                                 | 0 (0-0)                            |                                         | 1 (1-2)              |                           | 0 (0-0)                      |                                   |
| 2013 | Netherlands | 2 (1-2)                   |                                | 0 (0-0)                           |                                        | 0 (0-0)                    |                                 | 0 (0-0)                            |                                         | 0 (0-0)              |                           | 0 (0-0)                      |                                   |
| 2014 | Netherlands | 2 (1-2)                   |                                | 0 (0-0)                           |                                        | 1 (0-2)                    |                                 | 0 (0-0)                            |                                         | 1 (0-1)              |                           | 0 (0-0)                      |                                   |

Spn = *Streptococcus pneumoniae*; npnm = non-pneumonia, non-meningitis; HIV = deaths only in HIV-infected children; Uncertainty range provided in parentheses.

| Year | Country     | Spn pneumonia deaths (UR) | Spn pneumonia deaths, HIV (UR) | Spn pneumonia mortality rate (UR) | Spn pneumonia mortality rate, HIV (UR) | Spn meningitis deaths (UR) | Spn meningitis deaths, HIV (UR) | Spn meningitis mortality rate (UR) | Spn meningitis mortality rate, HIV (UR) | Spn NPNM deaths, HIV (UR) | Spn NPNM mortality rate (UR) | Spn NPNM mortality rate, HIV (UR) |
|------|-------------|---------------------------|--------------------------------|-----------------------------------|----------------------------------------|----------------------------|---------------------------------|------------------------------------|-----------------------------------------|---------------------------|------------------------------|-----------------------------------|
| 2015 | Netherlands | 2 (1-2)                   | 0 (0-0)                        | 0 (0-0)                           | 0 (0-0)                                | 1 (0-1)                    | 0 (0-0)                         | 0 (0-0)                            | 0 (0-0)                                 | 1 (0-1)                   | 0 (0-0)                      | 0 (0-0)                           |
| 2000 | New Zealand | 9 (6-9)                   |                                | 3 (2-3)                           |                                        | 8 (4-15)                   |                                 | 3 (1-5)                            |                                         | 7 (3-13)                  |                              | 3 (1-5)                           |
| 2001 | New Zealand | 4 (3-4)                   |                                | 1 (1-1)                           |                                        | 10 (5-18)                  |                                 | 4 (2-7)                            |                                         | 9 (4-16)                  |                              | 3 (2-6)                           |
| 2002 | New Zealand | 5 (4-6)                   |                                | 2 (1-2)                           |                                        | 8 (4-14)                   |                                 | 3 (1-5)                            |                                         | 7 (3-13)                  |                              | 3 (1-5)                           |
| 2003 | New Zealand | 4 (3-5)                   |                                | 2 (1-2)                           |                                        | 6 (3-10)                   |                                 | 2 (1-4)                            |                                         | 5 (2-9)                   |                              | 2 (1-3)                           |
| 2004 | New Zealand | 13 (9-14)                 |                                | 5 (3-5)                           |                                        | 6 (3-11)                   |                                 | 2 (1-4)                            |                                         | 5 (2-10)                  |                              | 2 (1-3)                           |
| 2005 | New Zealand | 8 (6-9)                   |                                | 3 (2-3)                           |                                        | 7 (3-13)                   |                                 | 2 (1-4)                            |                                         | 6 (3-11)                  |                              | 2 (1-4)                           |
| 2006 | New Zealand | 10 (7-10)                 |                                | 3 (2-4)                           |                                        | 1 (1-1)                    |                                 | 1 (0-1)                            |                                         | 1 (1-2)                   |                              | 0 (0-1)                           |
| 2007 | New Zealand | 10 (7-11)                 |                                | 4 (2-4)                           |                                        | 4 (2-7)                    |                                 | 1 (1-2)                            |                                         | 4 (2-6)                   |                              | 1 (1-2)                           |
| 2008 | New Zealand | 8 (6-9)                   |                                | 3 (2-3)                           |                                        | 6 (2-10)                   |                                 | 2 (1-3)                            |                                         | 5 (2-9)                   |                              | 2 (1-3)                           |
| 2009 | New Zealand | 6 (4-6)                   |                                | 2 (1-2)                           |                                        | 1 (1-2)                    |                                 | 0 (0-1)                            |                                         | 1 (1-2)                   |                              | 0 (0-1)                           |
| 2010 | New Zealand | 5 (4-5)                   |                                | 2 (1-2)                           |                                        | 3 (1-4)                    |                                 | 1 (0-1)                            |                                         | 2 (1-4)                   |                              | 1 (0-1)                           |
| 2011 | New Zealand | 4 (3-4)                   |                                | 1 (1-1)                           |                                        | 1 (1-1)                    |                                 | 1 (1-2)                            |                                         | 4 (2-6)                   |                              | 1 (1-2)                           |
| 2012 | New Zealand | 3 (2-4)                   |                                | 1 (1-1)                           |                                        | 2 (1-4)                    |                                 | 1 (0-1)                            |                                         | 2 (1-3)                   |                              | 1 (0-1)                           |
| 2013 | New Zealand | 2 (2-2)                   |                                | 1 (1-1)                           |                                        | 1 (1-2)                    |                                 | 0 (0-1)                            |                                         | 1 (1-2)                   |                              | 0 (0-1)                           |
| 2014 | New Zealand | 2 (2-2)                   |                                | 1 (1-1)                           |                                        | 1 (1-2)                    |                                 | 0 (0-1)                            |                                         | 1 (0-2)                   |                              | 0 (0-1)                           |
| 2015 | New Zealand | 2 (2-2)                   | 0 (0-0)                        | 1 (1-1)                           | 0 (0-0)                                | 1 (1-2)                    | 0 (0-0)                         | 0 (0-1)                            | 0 (0-0)                                 | 1 (0-2)                   | 0 (0-0)                      | 0 (0-1)                           |
| 2000 | Nicaragua   | 351 (249-365)             |                                | 54 (38-56)                        |                                        | 37 (10-97)                 |                                 | 6 (2-15)                           |                                         | 33 (9-86)                 |                              | 5 (1-13)                          |
| 2001 | Nicaragua   | 329 (233-343)             |                                | 51 (36-53)                        |                                        | 35 (10-92)                 |                                 | 5 (2-14)                           |                                         | 31 (9-81)                 |                              | 5 (1-13)                          |
| 2002 | Nicaragua   | 300 (213-312)             |                                | 47 (33-49)                        |                                        | 32 (9-83)                  |                                 | 5 (1-13)                           |                                         | 28 (8-74)                 |                              | 4 (1-12)                          |
| 2003 | Nicaragua   | 273 (194-285)             |                                | 43 (30-45)                        |                                        | 29 (9-76)                  |                                 | 5 (1-12)                           |                                         | 26 (8-68)                 |                              | 4 (1-11)                          |
| 2004 | Nicaragua   | 260 (185-271)             |                                | 41 (29-43)                        |                                        | 29 (9-75)                  |                                 | 5 (1-12)                           |                                         | 26 (8-67)                 |                              | 4 (1-11)                          |
| 2005 | Nicaragua   | 246 (175-257)             |                                | 39 (28-41)                        |                                        | 28 (8-72)                  |                                 | 4 (1-11)                           |                                         | 25 (7-64)                 |                              | 4 (1-10)                          |
| 2006 | Nicaragua   | 239 (169-249)             |                                | 38 (27-40)                        |                                        | 27 (8-69)                  |                                 | 4 (1-11)                           |                                         | 24 (7-62)                 |                              | 4 (1-10)                          |
| 2007 | Nicaragua   | 233 (165-243)             |                                | 38 (27-39)                        |                                        | 26 (8-62)                  |                                 | 4 (1-13)                           |                                         | 23 (5-73)                 |                              | 4 (1-12)                          |
| 2008 | Nicaragua   | 228 (162-238)             |                                | 37 (26-38)                        |                                        | 26 (5-79)                  |                                 | 4 (1-13)                           |                                         | 23 (5-71)                 |                              | 4 (1-11)                          |
| 2009 | Nicaragua   | 220 (156-225)             |                                | 35 (25-37)                        |                                        | 24 (5-76)                  |                                 | 4 (1-12)                           |                                         | 22 (5-68)                 |                              | 4 (1-11)                          |
| 2010 | Nicaragua   | 210 (149-218)             |                                | 34 (24-35)                        |                                        | 23 (5-72)                  |                                 | 4 (1-12)                           |                                         | 21 (4-64)                 |                              | 3 (1-10)                          |
| 2011 | Nicaragua   | 162 (115-169)             |                                | 26 (19-27)                        |                                        | 17 (4-52)                  |                                 | 3 (1-8)                            |                                         | 15 (3-47)                 |                              | 2 (1-8)                           |
| 2012 | Nicaragua   | 113 (80-118)              |                                | 18 (13-19)                        |                                        | 11 (3-35)                  |                                 | 2 (0-6)                            |                                         | 10 (2-31)                 |                              | 2 (0-5)                           |
| 2013 | Nicaragua   | 91 (64-95)                |                                | 15 (11-16)                        |                                        | 9 (2-28)                   |                                 | 2 (0-5)                            |                                         | 8 (2-25)                  |                              | 1 (0-4)                           |
| 2014 | Nicaragua   | 78 (55-81)                |                                | 13 (9-14)                         |                                        | 8 (2-25)                   |                                 | 1 (0-4)                            |                                         | 7 (2-22)                  |                              | 1 (0-4)                           |
| 2015 | Nicaragua   | 57 (40-59)                | 0 (0-0)                        | 10 (7-10)                         | 0 (0-0)                                | 5 (1-17)                   | 0 (0-0)                         | 1 (0-3)                            | 0 (0-0)                                 | 5 (1-15)                  | 0 (0-0)                      | 1 (0-3)                           |
| 2000 | Niger       | 8155 (5782-8498)          |                                | 359 (256-374)                     |                                        | 1693 (869-3273)            |                                 | 75 (38-144)                        |                                         | 532 (273-1029)            |                              | 23 (12-45)                        |
| 2001 | Niger       | 8344 (5917-8696)          |                                | 350 (248-365)                     |                                        | 1742 (909-3342)            |                                 | 73 (38-140)                        |                                         | 548 (286-1051)            |                              | 23 (12-44)                        |
| 2002 | Niger       | 8355 (5924-8707)          |                                | 337 (239-351)                     |                                        | 1757 (931-3340)            |                                 | 71 (38-135)                        |                                         | 552 (293-1050)            |                              | 22 (12-42)                        |
| 2003 | Niger       | 8250 (5950-8598)          |                                | 321 (228-335)                     |                                        | 1747 (939-3288)            |                                 | 68 (37-128)                        |                                         | 549 (295-1034)            |                              | 21 (11-40)                        |
| 2004 | Niger       | 8081 (5730-8422)          |                                | 304 (216-317)                     |                                        | 1726 (940-3211)            |                                 | 65 (35-121)                        |                                         | 543 (296-1010)            |                              | 20 (11-38)                        |
| 2005 | Niger       | 7884 (5590-8216)          |                                | 286 (203-298)                     |                                        | 1693 (937-3120)            |                                 | 61 (34-113)                        |                                         | 532 (295-981)             |                              | 19 (11-36)                        |
| 2006 | Niger       | 7689 (5452-8013)          |                                | 268 (190-279)                     |                                        | 1657 (935-3031)            |                                 | 58 (33-106)                        |                                         | 521 (294-953)             |                              | 18 (10-33)                        |
| 2007 | Niger       | 7680 (5446-8004)          |                                | 258 (183-268)                     |                                        | 1654 (940-3025)            |                                 | 55 (32-101)                        |                                         | 520 (296-951)             |                              | 17 (10-32)                        |
| 2008 | Niger       | 7083 (5023-7382)          |                                | 229 (163-239)                     |                                        | 1519 (813-3162)            |                                 | 49 (20-102)                        |                                         | 478 (193-994)             |                              | 15 (6-32)                         |
| 2009 | Niger       | 6775 (4804-7061)          |                                | 211 (150-220)                     |                                        | 1447 (592-3016)            |                                 | 45 (18-94)                         |                                         | 455 (186-948)             |                              | 14 (6-30)                         |
| 2010 | Niger       | 6777 (4806-7063)          |                                | 203 (144-212)                     |                                        | 1440 (596-3001)            |                                 | 43 (18-90)                         |                                         | 453 (187-943)             |                              | 14 (6-28)                         |
| 2011 | Niger       | 6643 (4710-6923)          |                                | 191 (135-199)                     |                                        | 1406 (588-2923)            |                                 | 40 (17-84)                         |                                         | 442 (185-919)             |                              | 13 (6-26)                         |
| 2012 | Niger       | 6570 (4658-6847)          |                                | 181 (128-189)                     |                                        | 1386 (585-2868)            |                                 | 38 (16-79)                         |                                         | 436 (184-902)             |                              | 12 (5-25)                         |
| 2013 | Niger       | 6409 (4545-6679)          |                                | 170 (121-177)                     |                                        | 1349 (574-2781)            |                                 | 36 (15-74)                         |                                         | 424 (180-874)             |                              | 11 (5-23)                         |
| 2014 | Niger       | 6141 (4355-6400)          |                                | 157 (111-163)                     |                                        | 1282 (550-2631)            |                                 | 33 (14-67)                         |                                         | 403 (173-827)             |                              | 10 (4-21)                         |
| 2015 | Niger       | 4571 (3241-4763)          | 80 (57-83)                     | 112 (80-117)                      | 2 (1-2)                                | 911 (395-1864)             | 16 (7-33)                       | 22 (10-46)                         | 0 (0-1)                                 | 286 (124-586)             | 5 (2-10)                     | 7 (3-14)                          |
| 2000 | Nigeria     | 42934 (30444-44744)       |                                | 207 (147-216)                     |                                        | 6305 (3225-12265)          |                                 | 30 (16-59)                         |                                         | 1982 (1014-3856)          |                              | 10 (5-19)                         |
| 2001 | Nigeria     | 43717 (31000-45560)       |                                | 204 (145-213)                     |                                        | 6369 (3296-12319)          |                                 | 30 (15-58)                         |                                         | 2002 (1036-3873)          |                              | 10 (5-18)                         |
| 2002 | Nigeria     | 44229 (31363-46093)       |                                | 201 (142-209)                     |                                        | 6355 (3327-12216)          |                                 | 29 (15-55)                         |                                         | 1998 (1046-3841)          |                              | 9 (5-17)                          |
| 2003 | Nigeria     | 43777 (31042-45622)       |                                | 193 (137-201)                     |                                        | 6158 (3258-11751)          |                                 | 27 (14-52)                         |                                         | 1936 (1024-3694)          |                              | 9 (5-16)                          |
| 2004 | Nigeria     | 44065 (31247-45923)       |                                | 189 (134-197)                     |                                        | 6043 (3233-11452)          |                                 | 26 (14-49)                         |                                         | 1900 (1016-3601)          |                              | 8 (4-15)                          |
| 2005 | Nigeria     | 44093 (31266-45952)       |                                | 184 (131-192)                     |                                        | 5919 (3208-11156)          |                                 | 25 (13-47)                         |                                         | 1861 (1009-3507)          |                              | 8 (4-15)                          |
| 2006 | Nigeria     | 45173 (32032-47077)       |                                | 183 (130-191)                     |                                        | 5938 (3268-11156)          |                                 | 24 (13-45)                         |                                         | 1867 (1028-3507)          |                              | 8 (4-14)                          |
| 2007 | Nigeria     | 45444 (32224-47360)       |                                | 179 (127-187)                     |                                        | 5869 (3265-12560)          |                                 | 23 (9-50)                          |                                         | 1845 (1012-3949)          |                              | 7 (3-16)                          |
| 2008 | Nigeria     | 45148 (32014-47051)       |                                | 174 (123-181)                     |                                        | 5752 (3281-12291)          |                                 | 22 (9-47)                          |                                         | 1808 (1017-3864)          |                              | 7 (3-15)                          |
| 2009 | Nigeria     | 45719 (32419-47646)       |                                | 172 (122-179)                     |                                        | 5743 (3245-12363)          |                                 | 22 (8-47)                          |                                         | 1805 (1016-3887)          |                              | 7 (3-15)                          |
| 2010 | Nigeria     | 46948 (33291-48927)       |                                | 172 (122-180)                     |                                        | 5804 (3237-12590)          |                                 | 21 (8-46)                          |                                         | 1825 (1013-3958)          |                              | 7 (3-15)                          |
| 2011 | Nigeria     | 47046 (33360-49029)       |                                | 168 (119-175)                     |                                        | 5737 (3180-12529)          |                                 | 21 (8-45)                          |                                         | 1804 (1016-3939)          |                              | 6 (2-14)                          |
| 2012 | Nigeria     | 46006 (32623-47946)       |                                | 161 (114-167)                     |                                        | 5546 (3066-12215)          |                                 | 19 (7-43)                          |                                         | 1744 (949-3840)           |                              | 6 (2-13)                          |
| 2013 | Nigeria     | 46045 (32651-47986)       |                                | 157 (111-164)                     |                                        | 5518 (3014-12245)          |                                 | 19 (7-42)                          |                                         | 1735 (933-3850)           |                              | 6 (2-13)                          |
| 2014 | Nigeria     | 45213 (32060-47118)       |                                | 151 (107-157)                     |                                        | 5404 (1933-12075)          |                                 | 18 (6-40)                          |                                         | 1699 (908-3796)           |                              | 6 (2-13)                          |
| 2015 | Nigeria     | 42386 (30055-44172)       | 8333 (5909-8684)               | 139 (98-144)                      | 27 (19-28)                             | 5025 (1762-11299)          | 988 (346-2221)                  | 16 (6-37)                          | 3 (1-7)                                 | 1580 (554-3552)           | 311 (109-698)                | 5 (2-12)                          |
| 2000 | Niue        | 0 (0-0)                   |                                | 0 (0-0)                           |                                        | 0 (0-0)                    |                                 | 12 (5-22)                          |                                         | 0 (0-0)                   |                              | 11 (5-19)                         |
| 2001 | Niue        | 0 (0-0)                   |                                | 57 (41-60)                        |                                        | 0 (0-0)                    |                                 | 13 (6-23)                          |                                         | 0 (0-0)                   |                              | 12 (6-21)                         |
| 2002 | Niue        | 0 (0-0)                   |                                | 55 (39-58)                        |                                        | 0 (0-0)                    |                                 | 13 (6-23)                          |                                         | 0 (0-0)                   |                              | 11 (5-20)                         |
| 2003 | Niue        | 0 (0-0)                   |                                | 53 (38-55)                        |                                        | 0 (0-0)                    |                                 | 12 (6-22)                          |                                         | 0 (0-0)                   |                              | 11 (5-20)                         |
| 2004 | Niue        | 0 (0-0)                   |                                | 0 (0-0)                           |                                        | 0 (0-0)                    |                                 | 0 (0-0)                            |                                         | 0 (0-0)                   |                              | 0 (0-0)                           |
| 2005 | Niue        | 0 (0-0)                   |                                | 0 (0-0)                           |                                        | 0 (0-0)                    |                                 | 0 (0-0)                            |                                         | 0 (0-0)                   |                              | 0 (0-0)                           |
| 2006 | Niue        | 0 (0-0)                   |                                | 52 (37-54)                        |                                        | 0 (0-0)                    |                                 | 13 (6-23)                          |                                         | 0 (0-0)                   |                              | 12 (6-21)                         |
| 2007 | Niue        | 0 (0-0)                   |                                | 53 (38-55)                        |                                        | 0 (0-0)                    |                                 | 13 (6-23)                          |                                         | 0 (0-0)                   |                              | 12 (6-21)                         |
| 2008 | Niue        | 0 (0-0)                   |                                | 56 (39-58)                        |                                        | 0 (0-0)                    |                                 | 14 (6-25)                          |                                         | 0 (0-0)                   |                              | 12 (6-21)                         |
| 2009 | Niue        | 0 (0-0)                   |                                | 38 (27-40)                        |                                        | 0 (0-0)                    |                                 | 11 (5-19)                          |                                         | 0 (0-0)                   |                              | 10 (4-17)                         |
| 2010 | Niue        | 0 (0-0)                   |                                | 39 (27-40)                        |                                        | 0 (0-0)                    |                                 | 10 (5-18)                          |                                         | 0 (0-0)                   |                              | 9 (4-16)                          |
| 2011 | Niue        | 0 (0-0)                   |                                | 28 (20-30)                        |                                        | 0 (0-0)                    |                                 | 8 (4-14)                           |                                         | 0 (0-0)                   |                              | 7 (3-14)                          |
| 2012 | Niue        | 0 (0-0)                   |                                | 27 (19-28)                        |                                        | 0 (0-0)                    |                                 | 7 (3-12)                           |                                         | 0 (0-0)                   |                              | 6 (3-11)                          |
| 2013 | Niue        | 0 (0-0)                   |                                | 18 (13-18)                        |                                        | 0 (0-0)                    |                                 | 5 (2-9)                            |                                         | 0 (0-0)                   |                              | 4 (2-8)                           |
| 2014 | Niue        | 0 (0-0)                   |                                | 17 (12-17)                        |                                        | 0 (0-0)                    |                                 | 4 (2-7)                            |                                         | 0 (0-0)                   |                              | 4 (2-7)                           |
| 2015 | Niue        | 0 (0-0)                   | 0 (0-0)                        | 16 (11-17)                        | 0 (0-0)                                | 0 (0-0)                    | 0 (0-0)                         | 4 (2-7)                            | 0 (0-0)                                 | 0 (0-0)                   | 0 (0-0)                      | 4 (2-6)                           |
| 2000 | Norway      | 3 (2-3)                   |                                | 1 (1-1)                           |                                        | 5 (2-9)                    |                                 | 2 (1-3)                            |                                         | 5 (2-8)                   |                              | 2 (1-3)                           |
| 2001 | Norway      | 2 (1-2)                   |                                | 1 (0-1)                           |                                        | 0 (0-0)                    |                                 | 0 (0-0)                            |                                         | 0 (0-0)                   |                              | 0 (0-0)                           |
| 2002 | Norway      | 2 (2-2)                   |                                | 1 (1-1)                           |                                        | 1 (0-1)                    |                                 | 0 (0-1)                            |                                         | 1 (0-1)                   |                              | 0 (0-1)                           |
| 2003 | Norway      | 2 (2-3)                   |                                | 1 (1-1)                           |                                        | 2 (1-4)                    |                                 | 1 (0-1)                            |                                         | 2 (1-3)                   |                              | 1 (0-1)                           |
| 2004 | Norway      | 1 (0-1)                   |                                | 0 (0-0)                           |                                        | 1 (0-2)                    |                                 | 0 (0-1)                            |                                         | 1 (0-2)                   |                              | 0 (0-1)                           |
| 2005 | Norway      | 2 (2-3)                   |                                | 1 (1-1)                           |                                        | 0 (0-0)                    |                                 | 0 (0-0)                            |                                         | 0 (0-0)                   |                              | 0 (0-0)                           |
| 2006 | Norway      | 0 (0-0)                   |                                | 0 (0-0)                           |                                        | 2 (1-3)                    |                                 | 1 (0-1)                            |                                         | 2 (1-3)                   |                              | 1 (0-1)                           |

Spn = *Streptococcus pneumoniae*; npnm = non-pneumonia, non-meningitis; HIV = deaths only in HIV-infected children; Uncertainty range provided in parentheses.

| Year | Country          | Spn pneumonia deaths (UR) | Spn pneumonia deaths, HIV (UR) | Spn pneumonia mortality rate (UR) | Spn pneumonia mortality rate, HIV (UR) | Spn meningitis deaths (UR) | Spn meningitis deaths, HIV (UR) | Spn meningitis mortality rate (UR) | Spn meningitis mortality rate, HIV (UR) | Spn NPNM deaths (UR) | Spn NPNM deaths, HIV (UR) | Spn NPNM mortality rate (UR) | Spn NPNM mortality rate, HIV (UR) |
|------|------------------|---------------------------|--------------------------------|-----------------------------------|----------------------------------------|----------------------------|---------------------------------|------------------------------------|-----------------------------------------|----------------------|---------------------------|------------------------------|-----------------------------------|
| 2007 | Norway           | 5 (3-5)                   |                                | 2 (1-2)                           |                                        | 1 (1-3)                    |                                 | 0 (0-1)                            |                                         | 1 (1-2)              |                           | 0 (0-1)                      |                                   |
| 2008 | Norway           | 1 (0-1)                   |                                | 0 (0-0)                           |                                        | 0 (0-0)                    |                                 | 0 (0-0)                            |                                         | 0 (0-0)              |                           | 0 (0-0)                      |                                   |
| 2009 | Norway           | 3 (2-3)                   |                                | 1 (1-1)                           |                                        | 1 (1-2)                    |                                 | 0 (0-1)                            |                                         | 1 (0-2)              |                           | 0 (0-1)                      |                                   |
| 2010 | Norway           | 1 (1-1)                   |                                | 0 (0-0)                           |                                        | 0 (0-1)                    |                                 | 0 (0-0)                            |                                         | 0 (0-1)              |                           | 0 (0-0)                      |                                   |
| 2011 | Norway           | 1 (1-1)                   |                                | 0 (0-0)                           |                                        | 1 (0-2)                    |                                 | 0 (0-0)                            |                                         | 1 (0-1)              |                           | 0 (0-0)                      |                                   |
| 2012 | Norway           | 1 (1-1)                   |                                | 0 (0-0)                           |                                        | 0 (0-0)                    |                                 | 0 (0-0)                            |                                         | 0 (0-0)              |                           | 0 (0-0)                      |                                   |
| 2013 | Norway           | 0 (0-0)                   |                                | 0 (0-0)                           |                                        | 0 (0-0)                    |                                 | 0 (0-0)                            |                                         | 0 (0-0)              |                           | 0 (0-0)                      |                                   |
| 2014 | Norway           | 0 (0-0)                   |                                | 0 (0-0)                           |                                        | 0 (0-0)                    |                                 | 0 (0-0)                            |                                         | 0 (0-0)              |                           | 0 (0-0)                      |                                   |
| 2015 | Norway           | 0 (0-0)                   |                                | 0 (0-0)                           |                                        | 0 (0-0)                    |                                 | 0 (0-0)                            |                                         | 0 (0-0)              |                           | 0 (0-0)                      |                                   |
| 2000 | Oman             | 33 (24-35)                | 0 (0-0)                        | 12 (9-13)                         | 0 (0-0)                                | 4 (2-5)                    | 0 (0-0)                         | 1 (1-2)                            | 0 (0-0)                                 | 3 (2-5)              | 0 (0-0)                   | 1 (1-2)                      | 0 (0-0)                           |
| 2001 | Oman             | 29 (20-30)                |                                | 11 (8-11)                         |                                        | 3 (2-5)                    |                                 | 1 (1-2)                            |                                         | 3 (2-4)              |                           | 1 (1-1)                      |                                   |
| 2002 | Oman             | 28 (20-29)                |                                | 11 (8-11)                         |                                        | 5 (3-6)                    |                                 | 2 (1-2)                            |                                         | 4 (2-6)              |                           | 2 (1-2)                      |                                   |
| 2003 | Oman             | 26 (18-27)                |                                | 10 (7-10)                         |                                        | 4 (3-6)                    |                                 | 2 (1-2)                            |                                         | 4 (2-5)              |                           | 1 (1-2)                      |                                   |
| 2004 | Oman             | 24 (17-25)                |                                | 9 (7-10)                          |                                        | 4 (2-5)                    |                                 | 2 (1-2)                            |                                         | 4 (2-5)              |                           | 1 (1-2)                      |                                   |
| 2005 | Oman             | 23 (16-24)                |                                | 9 (6-9)                           |                                        | 4 (2-5)                    |                                 | 1 (1-2)                            |                                         | 4 (2-5)              |                           | 1 (1-2)                      |                                   |
| 2006 | Oman             | 22 (16-23)                |                                | 9 (6-9)                           |                                        | 3 (2-5)                    |                                 | 1 (1-2)                            |                                         | 3 (2-4)              |                           | 1 (1-2)                      |                                   |
| 2007 | Oman             | 22 (16-23)                |                                | 9 (6-9)                           |                                        | 4 (2-5)                    |                                 | 1 (1-2)                            |                                         | 3 (2-4)              |                           | 1 (1-2)                      |                                   |
| 2008 | Oman             | 22 (16-23)                |                                | 9 (6-9)                           |                                        | 4 (2-5)                    |                                 | 1 (1-2)                            |                                         | 3 (2-4)              |                           | 1 (1-2)                      |                                   |
| 2009 | Oman             | 19 (14-20)                |                                | 7 (6-7)                           |                                        | 3 (2-4)                    |                                 | 1 (1-2)                            |                                         | 3 (2-4)              |                           | 1 (1-1)                      |                                   |
| 2010 | Oman             | 16 (12-17)                |                                | 5 (4-5)                           |                                        | 3 (2-4)                    |                                 | 1 (1-1)                            |                                         | 3 (2-3)              |                           | 1 (1-1)                      |                                   |
| 2011 | Oman             | 13 (9-13)                 |                                | 4 (3-4)                           |                                        | 2 (1-3)                    |                                 | 1 (0-1)                            |                                         | 2 (1-3)              |                           | 1 (0-1)                      |                                   |
| 2012 | Oman             | 12 (8-12)                 |                                | 4 (3-4)                           |                                        | 2 (1-3)                    |                                 | 1 (0-1)                            |                                         | 2 (1-3)              |                           | 1 (0-1)                      |                                   |
| 2013 | Oman             | 10 (7-11)                 |                                | 3 (2-3)                           |                                        | 2 (1-3)                    |                                 | 1 (0-1)                            |                                         | 2 (1-2)              |                           | 0 (0-1)                      |                                   |
| 2014 | Oman             | 10 (7-10)                 |                                | 3 (2-3)                           |                                        | 2 (1-3)                    |                                 | 1 (0-1)                            |                                         | 2 (1-2)              |                           | 0 (0-1)                      |                                   |
| 2015 | Oman             | 10 (7-10)                 | 0 (0-0)                        | 3 (2-3)                           | 0 (0-0)                                | 2 (1-3)                    | 0 (0-0)                         | 1 (0-1)                            | 0 (0-0)                                 | 2 (1-2)              | 0 (0-0)                   | 0 (0-1)                      | 0 (0-0)                           |
| 2000 | Pakistan         | 23715 (16817-24715)       |                                | 120 (85-125)                      | 0 (0-0)                                | 3333 (1484-2412)           |                                 | 17 (8-34)                          | 0 (0-0)                                 | 1048 (467-2088)      |                           | 5 (2-11)                     | 0 (0-0)                           |
| 2001 | Pakistan         | 23339 (16550-24323)       |                                | 117 (83-122)                      |                                        | 3267 (1461-4496)           |                                 | 16 (7-33)                          |                                         | 1027 (459-2043)      |                           | 5 (2-10)                     |                                   |
| 2002 | Pakistan         | 22769 (16146-23729)       |                                | 115 (81-120)                      |                                        | 3165 (1421-6283)           |                                 | 16 (7-32)                          |                                         | 995 (447-1975)       |                           | 5 (2-10)                     |                                   |
| 2003 | Pakistan         | 22329 (15833-23270)       |                                | 113 (80-118)                      |                                        | 3075 (1385-6093)           |                                 | 16 (7-31)                          |                                         | 967 (436-1916)       |                           | 5 (2-10)                     |                                   |
| 2004 | Pakistan         | 22049 (15635-22979)       |                                | 112 (80-117)                      |                                        | 3008 (1360-5949)           |                                 | 15 (7-30)                          |                                         | 946 (428-1870)       |                           | 5 (2-10)                     |                                   |
| 2005 | Pakistan         | 22061 (15643-22991)       |                                | 112 (79-117)                      |                                        | 2981 (1352-5895)           |                                 | 15 (7-30)                          |                                         | 937 (425-1850)       |                           | 5 (2-9)                      |                                   |
| 2006 | Pakistan         | 22049 (15635-22978)       |                                | 111 (79-116)                      |                                        | 2951 (1344-5820)           |                                 | 15 (7-29)                          |                                         | 928 (422-1830)       |                           | 5 (2-9)                      |                                   |
| 2007 | Pakistan         | 22201 (15743-23137)       |                                | 110 (78-114)                      |                                        | 2941 (1341-5806)           |                                 | 15 (7-29)                          |                                         | 925 (421-1825)       |                           | 5 (2-9)                      |                                   |
| 2008 | Pakistan         | 22404 (15887-23349)       |                                | 108 (76-112)                      |                                        | 2943 (1328-5834)           |                                 | 14 (6-28)                          |                                         | 925 (417-1834)       |                           | 4 (2-9)                      |                                   |
| 2009 | Pakistan         | 22641 (16055-23595)       |                                | 106 (75-110)                      |                                        | 2950 (1319-5877)           |                                 | 14 (6-27)                          |                                         | 927 (415-1848)       |                           | 4 (2-9)                      |                                   |
| 2010 | Pakistan         | 22655 (16064-23610)       |                                | 103 (73-107)                      |                                        | 2931 (1299-5870)           |                                 | 13 (6-27)                          |                                         | 922 (408-1845)       |                           | 4 (2-8)                      |                                   |
| 2011 | Pakistan         | 22691 (16090-23647)       |                                | 99 (71-104)                       |                                        | 2915 (1280-5865)           |                                 | 13 (6-26)                          |                                         | 917 (402-1844)       |                           | 4 (2-8)                      |                                   |
| 2012 | Pakistan         | 22356 (15853-23298)       |                                | 96 (68-100)                       |                                        | 2855 (1241-5796)           |                                 | 12 (5-25)                          |                                         | 897 (390-1813)       |                           | 4 (2-8)                      |                                   |
| 2013 | Pakistan         | 15577 (11045-16233)       |                                | 66 (47-69)                        |                                        | 1877 (817-3705)            |                                 | 8 (3-16)                           |                                         | 590 (251-1193)       |                           | 2 (1-5)                      |                                   |
| 2014 | Pakistan         | 13020 (9232-13568)        |                                | 54 (39-57)                        |                                        | 1614 (706-3258)            |                                 | 7 (3-14)                           |                                         | 507 (222-1024)       |                           | 2 (1-4)                      |                                   |
| 2015 | Pakistan         | 12361 (8765-12882)        | 40 (28-42)                     | 51 (36-53)                        | 0 (0-0)                                | 1565 (688-3155)            | 5 (2-10)                        | 6 (3-13)                           | 0 (0-0)                                 | 492 (216-992)        | 2 (1-3)                   | 2 (1-4)                      | 0 (0-0)                           |
| 2000 | Palau            | 0 (0-0)                   |                                | 17 (12-18)                        |                                        | 0 (0-0)                    |                                 | 6 (3-11)                           |                                         | 0 (0-0)              |                           | 5 (2-10)                     |                                   |
| 2001 | Palau            | 0 (0-0)                   |                                | 16 (11-17)                        |                                        | 0 (0-0)                    |                                 | 6 (3-10)                           |                                         | 0 (0-0)              |                           | 5 (2-9)                      |                                   |
| 2002 | Palau            | 0 (0-0)                   |                                | 19 (13-20)                        |                                        | 0 (0-0)                    |                                 | 7 (3-12)                           |                                         | 0 (0-0)              |                           | 6 (3-10)                     |                                   |
| 2003 | Palau            | 0 (0-0)                   |                                | 12 (9-13)                         |                                        | 0 (0-0)                    |                                 | 5 (2-8)                            |                                         | 0 (0-0)              |                           | 4 (2-7)                      |                                   |
| 2004 | Palau            | 0 (0-0)                   |                                | 15 (11-16)                        |                                        | 0 (0-0)                    |                                 | 5 (2-10)                           |                                         | 0 (0-0)              |                           | 5 (2-9)                      |                                   |
| 2005 | Palau            | 0 (0-0)                   |                                | 14 (10-15)                        |                                        | 0 (0-0)                    |                                 | 5 (2-9)                            |                                         | 0 (0-0)              |                           | 5 (2-8)                      |                                   |
| 2006 | Palau            | 0 (0-0)                   |                                | 14 (10-15)                        |                                        | 0 (0-0)                    |                                 | 5 (2-9)                            |                                         | 0 (0-0)              |                           | 5 (2-8)                      |                                   |
| 2007 | Palau            | 0 (0-0)                   |                                | 12 (8-12)                         |                                        | 0 (0-0)                    |                                 | 4 (2-7)                            |                                         | 0 (0-0)              |                           | 4 (2-6)                      |                                   |
| 2008 | Palau            | 0 (0-0)                   |                                | 13 (9-13)                         |                                        | 0 (0-0)                    |                                 | 4 (2-8)                            |                                         | 0 (0-0)              |                           | 4 (2-7)                      |                                   |
| 2009 | Palau            | 0 (0-0)                   |                                | 9 (6-9)                           |                                        | 0 (0-0)                    |                                 | 3 (1-5)                            |                                         | 0 (0-0)              |                           | 2 (1-4)                      |                                   |
| 2010 | Palau            | 0 (0-0)                   |                                | 13 (9-14)                         |                                        | 0 (0-0)                    |                                 | 4 (2-8)                            |                                         | 0 (0-0)              |                           | 4 (2-7)                      |                                   |
| 2011 | Palau            | 0 (0-0)                   |                                | 11 (8-12)                         |                                        | 0 (0-0)                    |                                 | 4 (2-7)                            |                                         | 0 (0-0)              |                           | 3 (2-6)                      |                                   |
| 2012 | Palau            | 0 (0-0)                   |                                | 5 (4-5)                           |                                        | 0 (0-0)                    |                                 | 2 (1-4)                            |                                         | 0 (0-0)              |                           | 2 (1-3)                      |                                   |
| 2013 | Palau            | 0 (0-0)                   |                                | 3 (2-3)                           |                                        | 0 (0-0)                    |                                 | 1 (0-2)                            |                                         | 0 (0-0)              |                           | 1 (0-2)                      |                                   |
| 2014 | Palau            | 0 (0-0)                   |                                | 3 (2-3)                           |                                        | 0 (0-0)                    |                                 | 1 (0-2)                            |                                         | 0 (0-0)              |                           | 1 (0-1)                      |                                   |
| 2015 | Palau            | 0 (0-0)                   | 0 (0-0)                        | 3 (2-3)                           | 0 (0-0)                                | 0 (0-0)                    | 0 (0-0)                         | 1 (0-1)                            | 0 (0-0)                                 | 0 (0-0)              | 0 (0-0)                   | 1 (0-1)                      | 0 (0-0)                           |
| 2000 | Panama           | 38 (27-40)                |                                | 11 (8-12)                         |                                        | 7 (2-20)                   |                                 | 2 (1-6)                            |                                         | 7 (2-18)             |                           | 2 (1-5)                      |                                   |
| 2001 | Panama           | 43 (31-45)                |                                | 13 (9-13)                         |                                        | 11 (3-29)                  |                                 | 3 (1-9)                            |                                         | 10 (3-26)            |                           | 3 (1-8)                      |                                   |
| 2002 | Panama           | 40 (28-41)                |                                | 12 (8-12)                         |                                        | 10 (3-28)                  |                                 | 3 (1-8)                            |                                         | 9 (3-25)             |                           | 3 (1-7)                      |                                   |
| 2003 | Panama           | 43 (31-45)                |                                | 13 (9-13)                         |                                        | 5 (1-13)                   |                                 | 1 (0-4)                            |                                         | 4 (1-11)             |                           | 1 (0-3)                      |                                   |
| 2004 | Panama           | 45 (32-46)                |                                | 13 (9-14)                         |                                        | 10 (3-26)                  |                                 | 3 (1-8)                            |                                         | 9 (3-23)             |                           | 3 (1-7)                      |                                   |
| 2005 | Panama           | 55 (39-58)                |                                | 16 (12-17)                        |                                        | 6 (2-17)                   |                                 | 2 (1-5)                            |                                         | 6 (2-15)             |                           | 2 (1-5)                      |                                   |
| 2006 | Panama           | 53 (38-55)                |                                | 16 (11-17)                        |                                        | 8 (2-20)                   |                                 | 2 (1-6)                            |                                         | 7 (2-18)             |                           | 2 (1-5)                      |                                   |
| 2007 | Panama           | 63 (45-66)                |                                | 19 (13-20)                        |                                        | 7 (2-20)                   |                                 | 2 (1-6)                            |                                         | 7 (2-18)             |                           | 2 (1-5)                      |                                   |
| 2008 | Panama           | 68 (48-71)                |                                | 20 (14-21)                        |                                        | 5 (1-13)                   |                                 | 1 (0-4)                            |                                         | 4 (1-11)             |                           | 1 (0-3)                      |                                   |
| 2009 | Panama           | 44 (31-46)                |                                | 13 (9-13)                         |                                        | 10 (3-27)                  |                                 | 3 (1-8)                            |                                         | 9 (3-24)             |                           | 3 (1-7)                      |                                   |
| 2010 | Panama           | 73 (52-76)                |                                | 21 (15-22)                        |                                        | 9 (3-23)                   |                                 | 2 (1-6)                            |                                         | 8 (2-20)             |                           | 2 (1-6)                      |                                   |
| 2011 | Panama           | 59 (42-62)                |                                | 17 (12-17)                        |                                        | 8 (3-21)                   |                                 | 2 (1-6)                            |                                         | 7 (2-19)             |                           | 2 (1-5)                      |                                   |
| 2012 | Panama           | 45 (32-47)                |                                | 12 (9-13)                         |                                        | 5 (1-12)                   |                                 | 1 (0-3)                            |                                         | 4 (1-11)             |                           | 1 (0-3)                      |                                   |
| 2013 | Panama           | 43 (31-45)                |                                | 12 (9-13)                         |                                        | 5 (2-13)                   |                                 | 1 (0-4)                            |                                         | 4 (1-11)             |                           | 1 (0-3)                      |                                   |
| 2014 | Panama           | 28 (20-29)                |                                | 8 (5-8)                           |                                        | 3 (1-8)                    |                                 | 1 (0-2)                            |                                         | 3 (1-7)              |                           | 1 (0-2)                      |                                   |
| 2015 | Panama           | 21 (15-22)                | 0 (0-0)                        | 6 (4-6)                           | 0 (0-0)                                | 2 (1-6)                    | 0 (0-0)                         | 1 (0-2)                            | 0 (0-0)                                 | 2 (1-6)              | 0 (0-0)                   | 1 (0-2)                      | 0 (0-0)                           |
| 2000 | Papua New Guinea | 859 (609-895)             |                                | 105 (74-109)                      |                                        | 64 (21-196)                |                                 | 8 (3-24)                           |                                         | 20 (7-62)            |                           | 2 (1-8)                      |                                   |
| 2001 | Papua New Guinea | 875 (621-912)             |                                | 104 (74-108)                      |                                        | 66 (21-201)                |                                 | 8 (3-24)                           |                                         | 21 (7-63)            |                           | 2 (1-8)                      |                                   |
| 2002 | Papua New Guinea | 884 (627-921)             |                                | 103 (73-108)                      |                                        | 67 (22-204)                |                                 | 8 (3-24)                           |                                         | 21 (7-64)            |                           | 2 (1-8)                      |                                   |
| 2003 | Papua New Guinea | 866 (628-923)             |                                | 102 (72-106)                      |                                        | 67 (22-205)                |                                 | 8 (3-24)                           |                                         | 21 (7-65)            |                           | 2 (1-7)                      |                                   |
| 2004 | Papua New Guinea | 889 (631-927)             |                                | 101 (72-106)                      |                                        | 68 (22-206)                |                                 | 8 (3-24)                           |                                         | 21 (7-65)            |                           | 2 (1-7)                      |                                   |
| 2005 | Papua New Guinea | 891 (632-929)             |                                | 100 (71-105)                      |                                        | 67 (19-217)                |                                 | 8 (2-24)                           |                                         | 60 (17-193)          |                           | 7 (2-22)                     |                                   |
| 2006 | Papua New Guinea | 890 (631-928)             |                                | 99 (71-104)                       |                                        | 67 (19-215)                |                                 | 7 (2-24)                           |                                         | 59 (17-192)          |                           | 7 (2-21)                     |                                   |
| 2007 | Papua New Guinea | 891 (631-928)             |                                | 98 (70-102)                       |                                        | 66 (19-213)                |                                 | 7 (2-23)                           |                                         | 59 (17-190)          |                           | 6 (2-21)                     |                                   |
| 2008 | Papua New Guinea | 883 (626-920)             |                                | 96 (68-100)                       |                                        | 65 (18-208)                |                                 | 7 (2-23)                           |                                         | 58 (16-185)          |                           | 6 (2-20)                     |                                   |
| 2009 | Papua New Guinea | 878 (623-915)             |                                | 94 (67-98)                        |                                        | 64 (18-204)                |                                 | 7 (2-22)                           |                                         | 57 (16-182)          |                           | 6 (2-19)                     |                                   |
| 2010 | Papua New Guinea | 864 (613-900)             |                                | 91 (65-95)                        |                                        | 62 (18-198)                |                                 | 7 (2-21)                           |                                         | 55 (16-176)          |                           | 6 (2-19)                     |                                   |
| 2011 | Papua New Guinea | 849 (602-885)             |                                | 89 (63-93)                        |                                        | 60 (18-192)                |                                 | 6 (2-20)                           |                                         | 54 (16-171)          |                           | 6 (2-18)                     |                                   |
| 2012 | Papua New Guinea | 832 (590-867)             |                                | 86 (61-90)                        |                                        | 58 (17-185)                |                                 | 6 (2-19)                           |                                         | 52 (15-165)          |                           | 5 (2-17)                     |                                   |
| 2013 | Papua New Guinea | 817 (579-852)             |                                | 84 (60-88)                        |                                        | 57 (17-181)                |                                 | 6 (2-19)                           |                                         | 51 (15-161)          |                           | 5 (2-17)                     |                                   |
| 2014 | Papua New Guinea | 794 (563-828)             |                                | 82 (58-85)                        |                                        | 55 (16-174)                |                                 | 6 (2-18)                           |                                         | 49 (15-155)          |                           | 5 (1-16)                     |                                   |

Spn = *Streptococcus pneumoniae*; npnm = non-pneumonia, non-meningitis; HIV = deaths only in HIV-infected children; Uncertainty range provided in parentheses.

| Year | Country          | Spn pneumonia deaths (UR) | Spn pneumonia deaths, HIV (UR) | Spn pneumonia mortality rate (UR) | Spn pneumonia mortality rate, HIV (UR) | Spn meningitis deaths (UR) | Spn meningitis deaths, HIV (UR) | Spn meningitis mortality rate (UR) | Spn meningitis mortality rate, HIV (UR) | Spn NPNM deaths (UR) | Spn NPNM deaths, HIV (UR) | Spn NPNM mortality rate (UR) | Spn NPNM mortality rate, HIV (UR) |
|------|------------------|---------------------------|--------------------------------|-----------------------------------|----------------------------------------|----------------------------|---------------------------------|------------------------------------|-----------------------------------------|----------------------|---------------------------|------------------------------|-----------------------------------|
| 2015 | Papua New Guinea | 671 (475-699)             | 35 (25-37)                     | 68 (49-71)                        | 4 (3-4)                                | 48 (14-152)                | 3 (1-8)                         | 5 (1-16)                           | 0 (0-1)                                 | 43 (13-135)          | 2 (1-7)                   | 4 (1-14)                     | 0 (0-1)                           |
| 2000 | Paraguay         | 204 (145-212)             |                                | 29 (21-31)                        |                                        | 21 (8-37)                  |                                 | 3 (1-5)                            |                                         | 19 (7-33)            |                           | 3 (1-5)                      |                                   |
| 2001 | Paraguay         | 195 (138-203)             |                                | 28 (20-29)                        |                                        | 20 (8-35)                  |                                 | 3 (1-5)                            |                                         | 18 (7-31)            |                           | 3 (1-4)                      |                                   |
| 2002 | Paraguay         | 182 (129-190)             |                                | 27 (19-28)                        |                                        | 19 (7-33)                  |                                 | 3 (1-5)                            |                                         | 17 (6-29)            |                           | 2 (1-4)                      |                                   |
| 2003 | Paraguay         | 188 (134-196)             |                                | 28 (20-29)                        |                                        | 34 (12-57)                 |                                 | 5 (2-8)                            |                                         | 30 (11-50)           |                           | 5 (2-7)                      |                                   |
| 2004 | Paraguay         | 182 (129-189)             |                                | 27 (19-28)                        |                                        | 35 (20-52)                 |                                 | 5 (3-9)                            |                                         | 31 (18-56)           |                           | 5 (3-8)                      |                                   |
| 2005 | Paraguay         | 172 (122-179)             |                                | 26 (19-27)                        |                                        | 34 (18-57)                 |                                 | 5 (3-9)                            |                                         | 30 (16-51)           |                           | 5 (2-8)                      |                                   |
| 2006 | Paraguay         | 165 (117-172)             |                                | 25 (18-26)                        |                                        | 33 (17-52)                 |                                 | 5 (3-8)                            |                                         | 29 (15-47)           |                           | 4 (2-7)                      |                                   |
| 2007 | Paraguay         | 158 (112-164)             |                                | 24 (17-25)                        |                                        | 31 (15-49)                 |                                 | 5 (2-8)                            |                                         | 28 (14-43)           |                           | 4 (2-7)                      |                                   |
| 2008 | Paraguay         | 153 (109-160)             |                                | 23 (17-24)                        |                                        | 31 (15-48)                 |                                 | 5 (2-7)                            |                                         | 27 (13-43)           |                           | 4 (2-7)                      |                                   |
| 2009 | Paraguay         | 146 (104-153)             |                                | 22 (16-23)                        |                                        | 29 (14-45)                 |                                 | 4 (2-7)                            |                                         | 26 (13-40)           |                           | 4 (2-6)                      |                                   |
| 2010 | Paraguay         | 141 (100-147)             |                                | 21 (15-22)                        |                                        | 28 (14-43)                 |                                 | 4 (2-7)                            |                                         | 25 (12-39)           |                           | 4 (2-6)                      |                                   |
| 2011 | Paraguay         | 134 (95-140)              |                                | 20 (14-21)                        |                                        | 26 (13-41)                 |                                 | 4 (2-6)                            |                                         | 24 (12-36)           |                           | 3 (2-5)                      |                                   |
| 2012 | Paraguay         | 97 (68-101)               |                                | 14 (10-15)                        |                                        | 19 (9-29)                  |                                 | 3 (1-4)                            |                                         | 17 (8-26)            |                           | 3 (1-4)                      |                                   |
| 2013 | Paraguay         | 76 (54-79)                |                                | 11 (8-12)                         |                                        | 15 (7-23)                  |                                 | 2 (1-3)                            |                                         | 13 (7-21)            |                           | 2 (1-3)                      |                                   |
| 2014 | Paraguay         | 66 (47-69)                |                                | 10 (7-10)                         |                                        | 13 (7-21)                  |                                 | 2 (1-3)                            |                                         | 12 (6-18)            |                           | 2 (1-3)                      |                                   |
| 2015 | Paraguay         | 59 (42-61)                | 1 (0-1)                        | 9 (6-9)                           | 0 (0-0)                                | 12 (6-18)                  | 0 (0-0)                         | 2 (1-3)                            | 0 (0-0)                                 | 11 (5-16)            | 0 (0-0)                   | 2 (1-2)                      | 0 (0-0)                           |
| 2000 | Peru             | 1417 (1005-1476)          |                                | 48 (34-50)                        |                                        | 234 (66-608)               |                                 | 8 (2-21)                           |                                         | 208 (99-541)         |                           | 7 (2-18)                     |                                   |
| 2001 | Peru             | 1227 (870-1279)           |                                | 42 (30-44)                        |                                        | 195 (57-504)               |                                 | 7 (2-17)                           |                                         | 174 (51-449)         |                           | 6 (2-15)                     |                                   |
| 2002 | Peru             | 1097 (778-1143)           |                                | 38 (27-39)                        |                                        | 178 (54-455)               |                                 | 6 (2-16)                           |                                         | 159 (48-405)         |                           | 5 (2-14)                     |                                   |
| 2003 | Peru             | 972 (689-1013)            |                                | 33 (24-35)                        |                                        | 157 (49-397)               |                                 | 5 (2-14)                           |                                         | 140 (44-353)         |                           | 5 (2-12)                     |                                   |
| 2004 | Peru             | 873 (619-910)             |                                | 30 (21-31)                        |                                        | 160 (38-484)               |                                 | 5 (1-17)                           |                                         | 142 (34-431)         |                           | 5 (1-15)                     |                                   |
| 2005 | Peru             | 786 (557-819)             |                                | 27 (19-28)                        |                                        | 142 (33-430)               |                                 | 5 (1-15)                           |                                         | 127 (29-383)         |                           | 4 (1-13)                     |                                   |
| 2006 | Peru             | 729 (517-760)             |                                | 25 (18-26)                        |                                        | 131 (30-396)               |                                 | 5 (1-14)                           |                                         | 117 (27-352)         |                           | 4 (1-12)                     |                                   |
| 2007 | Peru             | 670 (475-698)             |                                | 23 (16-24)                        |                                        | 120 (29-360)               |                                 | 4 (1-12)                           |                                         | 107 (26-321)         |                           | 4 (1-11)                     |                                   |
| 2008 | Peru             | 615 (436-641)             |                                | 21 (15-22)                        |                                        | 111 (25-330)               |                                 | 4 (1-11)                           |                                         | 99 (25-294)          |                           | 3 (1-10)                     |                                   |
| 2009 | Peru             | 554 (393-578)             |                                | 19 (14-20)                        |                                        | 100 (26-297)               |                                 | 3 (1-10)                           |                                         | 89 (23-264)          |                           | 3 (1-9)                      |                                   |
| 2010 | Peru             | 446 (316-465)             |                                | 15 (11-16)                        |                                        | 78 (19-236)                |                                 | 3 (1-8)                            |                                         | 70 (17-210)          |                           | 2 (1-7)                      |                                   |
| 2011 | Peru             | 373 (265-389)             |                                | 13 (9-13)                         |                                        | 65 (14-201)                |                                 | 2 (0-7)                            |                                         | 58 (12-179)          |                           | 2 (0-6)                      |                                   |
| 2012 | Peru             | 286 (203-298)             |                                | 10 (7-10)                         |                                        | 49 (10-153)                |                                 | 2 (0-5)                            |                                         | 43 (9-136)           |                           | 1 (0-3)                      |                                   |
| 2013 | Peru             | 196 (139-205)             |                                | 7 (5-7)                           |                                        | 32 (7-101)                 |                                 | 1 (0-3)                            |                                         | 29 (6-90)            |                           | 1 (0-3)                      |                                   |
| 2014 | Peru             | 157 (112-164)             |                                | 5 (4-6)                           |                                        | 26 (6-81)                  |                                 | 1 (0-3)                            |                                         | 23 (5-72)            |                           | 1 (0-2)                      |                                   |
| 2015 | Peru             | 140 (99-146)              | 1 (0-1)                        | 5 (3-5)                           | 0 (0-0)                                | 23 (5-72)                  | 0 (0-0)                         | 1 (0-2)                            | 0 (0-0)                                 | 20 (4-64)            | 0 (0-0)                   | 1 (0-2)                      | 0 (0-0)                           |
| 2000 | Philippines      | 5040 (3574-5253)          |                                | 48 (34-50)                        |                                        | 613 (219-1344)             |                                 | 6 (2-13)                           |                                         | 546 (195-1196)       |                           | 5 (2-11)                     |                                   |
| 2001 | Philippines      | 4978 (3530-5188)          |                                | 46 (33-48)                        |                                        | 600 (212-1319)             |                                 | 6 (2-12)                           |                                         | 534 (189-1175)       |                           | 5 (2-11)                     |                                   |
| 2002 | Philippines      | 4899 (3474-5106)          |                                | 45 (32-47)                        |                                        | 585 (204-1291)             |                                 | 5 (2-12)                           |                                         | 521 (182-1150)       |                           | 5 (2-11)                     |                                   |
| 2003 | Philippines      | 4838 (3431-5042)          |                                | 44 (31-46)                        |                                        | 572 (197-1267)             |                                 | 5 (2-11)                           |                                         | 509 (176-1128)       |                           | 5 (2-10)                     |                                   |
| 2004 | Philippines      | 4753 (3371-4954)          |                                | 42 (30-44)                        |                                        | 555 (190-1237)             |                                 | 5 (2-11)                           |                                         | 495 (169-1101)       |                           | 4 (2-10)                     |                                   |
| 2005 | Philippines      | 4528 (3211-4719)          |                                | 40 (29-42)                        |                                        | 522 (177-1168)             |                                 | 5 (2-10)                           |                                         | 465 (157-1040)       |                           | 4 (1-9)                      |                                   |
| 2006 | Philippines      | 4482 (3178-4671)          |                                | 40 (29-42)                        |                                        | 511 (171-1146)             |                                 | 5 (2-10)                           |                                         | 454 (152-1020)       |                           | 4 (1-9)                      |                                   |
| 2007 | Philippines      | 4341 (3078-4524)          |                                | 39 (28-41)                        |                                        | 488 (161-1098)             |                                 | 4 (1-10)                           |                                         | 438 (144-978)        |                           | 4 (1-9)                      |                                   |
| 2008 | Philippines      | 4193 (2973-4370)          |                                | 39 (27-40)                        |                                        | 466 (152-1050)             |                                 | 4 (1-10)                           |                                         | 415 (135-935)        |                           | 4 (1-9)                      |                                   |
| 2009 | Philippines      | 4043 (2867-4214)          |                                | 38 (27-40)                        |                                        | 445 (150-995)              |                                 | 4 (1-9)                            |                                         | 396 (133-886)        |                           | 4 (1-8)                      |                                   |
| 2010 | Philippines      | 3917 (2778-4082)          |                                | 37 (26-39)                        |                                        | 429 (149-948)              |                                 | 4 (1-9)                            |                                         | 382 (133-844)        |                           | 4 (1-8)                      |                                   |
| 2011 | Philippines      | 3848 (2729-4011)          |                                | 36 (26-38)                        |                                        | 422 (151-921)              |                                 | 4 (1-9)                            |                                         | 376 (135-820)        |                           | 4 (1-8)                      |                                   |
| 2012 | Philippines      | 3771 (2674-3930)          |                                | 35 (25-37)                        |                                        | 415 (154-894)              |                                 | 4 (1-8)                            |                                         | 370 (137-796)        |                           | 3 (1-7)                      |                                   |
| 2013 | Philippines      | 3743 (2654-3901)          |                                | 35 (24-36)                        |                                        | 415 (116-1056)             |                                 | 4 (1-10)                           |                                         | 369 (103-940)        |                           | 3 (1-9)                      |                                   |
| 2014 | Philippines      | 3096 (2195-3226)          |                                | 28 (20-29)                        |                                        | 337 (99-847)               |                                 | 3 (1-8)                            |                                         | 300 (88-754)         |                           | 3 (1-7)                      |                                   |
| 2015 | Philippines      | 3182 (2256-3316)          | 3 (2-3)                        | 29 (20-30)                        | 0 (0-0)                                | 357 (111-888)              | 0 (0-1)                         | 3 (1-8)                            | 0 (0-0)                                 | 318 (99-790)         | 0 (0-1)                   | 3 (1-7)                      | 0 (0-0)                           |
| 2000 | Poland           | 47 (33-49)                |                                | 2 (2-3)                           |                                        | 10 (5-19)                  |                                 | 1 (0-1)                            |                                         | 9 (4-17)             |                           | 0 (0-1)                      |                                   |
| 2001 | Poland           | 38 (27-40)                |                                | 2 (1-2)                           |                                        | 9 (4-17)                   |                                 | 1 (0-1)                            |                                         | 8 (4-15)             |                           | 0 (0-1)                      |                                   |
| 2002 | Poland           | 29 (21-30)                |                                | 2 (1-2)                           |                                        | 7 (3-12)                   |                                 | 0 (0-1)                            |                                         | 6 (3-11)             |                           | 0 (0-1)                      |                                   |
| 2003 | Poland           | 34 (24-35)                |                                | 2 (1-2)                           |                                        | 7 (3-13)                   |                                 | 0 (0-1)                            |                                         | 7 (3-12)             |                           | 0 (0-1)                      |                                   |
| 2004 | Poland           | 35 (25-37)                |                                | 2 (1-2)                           |                                        | 6 (3-11)                   |                                 | 0 (0-1)                            |                                         | 5 (2-10)             |                           | 0 (0-1)                      |                                   |
| 2005 | Poland           | 36 (26-38)                |                                | 2 (1-2)                           |                                        | 6 (3-12)                   |                                 | 0 (0-1)                            |                                         | 6 (3-10)             |                           | 0 (0-1)                      |                                   |
| 2006 | Poland           | 39 (27-40)                |                                | 2 (2-2)                           |                                        | 10 (5-19)                  |                                 | 1 (0-1)                            |                                         | 9 (4-17)             |                           | 1 (0-1)                      |                                   |
| 2007 | Poland           | 43 (31-45)                |                                | 2 (2-2)                           |                                        | 8 (4-15)                   |                                 | 0 (0-1)                            |                                         | 7 (3-13)             |                           | 0 (0-1)                      |                                   |
| 2008 | Poland           | 40 (28-41)                |                                | 2 (1-2)                           |                                        | 10 (4-18)                  |                                 | 1 (0-1)                            |                                         | 9 (4-16)             |                           | 0 (0-1)                      |                                   |
| 2009 | Poland           | 45 (32-47)                |                                | 2 (2-2)                           |                                        | 8 (4-15)                   |                                 | 0 (0-1)                            |                                         | 7 (3-14)             |                           | 0 (0-1)                      |                                   |
| 2010 | Poland           | 38 (27-40)                |                                | 2 (1-2)                           |                                        | 8 (3-14)                   |                                 | 0 (0-1)                            |                                         | 7 (3-12)             |                           | 0 (0-1)                      |                                   |
| 2011 | Poland           | 30 (21-31)                |                                | 1 (1-2)                           |                                        | 7 (3-13)                   |                                 | 0 (0-1)                            |                                         | 6 (3-11)             |                           | 0 (0-1)                      |                                   |
| 2012 | Poland           | 30 (21-32)                |                                | 1 (1-2)                           |                                        | 6 (3-11)                   |                                 | 0 (0-1)                            |                                         | 6 (3-10)             |                           | 0 (0-0)                      |                                   |
| 2013 | Poland           | 40 (28-41)                |                                | 2 (1-2)                           |                                        | 6 (3-10)                   |                                 | 0 (0-0)                            |                                         | 5 (2-9)              |                           | 0 (0-0)                      |                                   |
| 2014 | Poland           | 31 (22-32)                |                                | 2 (1-2)                           |                                        | 6 (3-10)                   |                                 | 0 (0-1)                            |                                         | 5 (2-9)              |                           | 0 (0-0)                      |                                   |
| 2015 | Poland           | 31 (22-32)                | 0 (0-0)                        | 2 (1-2)                           | 0 (0-0)                                | 6 (3-11)                   | 0 (0-0)                         | 0 (0-1)                            | 0 (0-0)                                 | 5 (2-9)              | 0 (0-0)                   | 0 (0-0)                      | 0 (0-0)                           |
| 2000 | Portugal         | 10 (7-11)                 |                                | 2 (1-2)                           |                                        | 12 (6-22)                  |                                 | 2 (1-4)                            |                                         | 11 (5-20)            |                           | 2 (1-4)                      |                                   |
| 2001 | Portugal         | 10 (7-11)                 |                                | 2 (1-2)                           |                                        | 3 (2-6)                    |                                 | 1 (0-1)                            |                                         | 3 (1-6)              |                           | 1 (0-1)                      |                                   |
| 2002 | Portugal         | 11 (7-11)                 |                                | 2 (1-2)                           |                                        | 9 (4-17)                   |                                 | 2 (1-3)                            |                                         | 8 (4-15)             |                           | 2 (1-3)                      |                                   |
| 2003 | Portugal         | 9 (7-10)                  |                                | 2 (1-2)                           |                                        | 6 (3-11)                   |                                 | 1 (1-2)                            |                                         | 5 (2-10)             |                           | 1 (0-2)                      |                                   |
| 2004 | Portugal         | 6 (4-7)                   |                                | 1 (1-1)                           |                                        | 3 (1-6)                    |                                 | 1 (0-1)                            |                                         | 3 (1-5)              |                           | 1 (0-1)                      |                                   |
| 2005 | Portugal         | 5 (4-6)                   |                                | 1 (1-1)                           |                                        | 3 (1-5)                    |                                 | 1 (0-1)                            |                                         | 2 (1-4)              |                           | 0 (0-1)                      |                                   |
| 2006 | Portugal         | 5 (4-5)                   |                                | 1 (1-1)                           |                                        | 3 (1-5)                    |                                 | 0 (0-1)                            |                                         | 2 (1-4)              |                           | 0 (0-1)                      |                                   |
| 2007 | Portugal         | 3 (2-3)                   |                                | 0 (0-1)                           |                                        | 1 (1-2)                    |                                 | 0 (0-0)                            |                                         | 1 (1-2)              |                           | 0 (0-0)                      |                                   |
| 2008 | Portugal         | 4 (3-4)                   |                                | 1 (1-1)                           |                                        | 1 (0-2)                    |                                 | 0 (0-0)                            |                                         | 1 (0-1)              |                           | 0 (0-0)                      |                                   |
| 2009 | Portugal         | 7 (5-7)                   |                                | 1 (1-1)                           |                                        | 1 (0-2)                    |                                 | 0 (0-0)                            |                                         | 1 (0-1)              |                           | 0 (0-0)                      |                                   |
| 2010 | Portugal         | 1 (1-1)                   |                                | 0 (0-0)                           |                                        | 2 (1-3)                    |                                 | 0 (0-1)                            |                                         | 1 (1-3)              |                           | 0 (0-1)                      |                                   |
| 2011 | Portugal         | 3 (2-3)                   |                                | 1 (0-1)                           |                                        | 1 (0-1)                    |                                 | 0 (0-0)                            |                                         | 1 (0-2)              |                           | 0 (0-0)                      |                                   |
| 2012 | Portugal         | 1 (0-1)                   |                                | 0 (0-0)                           |                                        | 0 (0-1)                    |                                 | 0 (0-0)                            |                                         | 0 (0-0)              |                           | 0 (0-0)                      |                                   |
| 2013 | Portugal         | 1 (1-1)                   |                                | 0 (0-0)                           |                                        | 1 (0-1)                    |                                 | 0 (0-0)                            |                                         | 1 (0-1)              |                           | 0 (0-0)                      |                                   |
| 2014 | Portugal         | 1 (1-1)                   |                                | 0 (0-0)                           |                                        | 0 (0-1)                    |                                 | 0 (0-0)                            |                                         | 0 (0-1)              |                           | 0 (0-0)                      |                                   |
| 2015 | Portugal         | 0 (0-1)                   | 0 (0-0)                        | 0 (0-0)                           | 0 (0-0)                                | 0 (0-1)                    | 0 (0-0)                         | 0 (0-0)                            | 0 (0-0)                                 | 0 (0-0)              | 0 (0-0)                   | 0 (0-0)                      | 0 (0-0)                           |
| 2000 | Qatar            | 3 (2-3)                   |                                | 6 (4-6)                           |                                        | 1 (0-1)                    |                                 | 1 (1-2)                            |                                         | 1 (0-1)              |                           | 1 (1-2)                      |                                   |
| 2001 | Qatar            | 3 (2-3)                   |                                | 5 (4-5)                           |                                        | 1 (0-1)                    |                                 | 1 (1-2)                            |                                         | 1 (0-1)              |                           | 1 (1-2)                      |                                   |
| 2002 | Qatar            | 3 (2-3)                   |                                | 5 (3-5)                           |                                        | 1 (0-1)                    |                                 | 1 (1-2)                            |                                         | 1 (0-1)              |                           | 1 (1-2)                      |                                   |
| 2003 | Qatar            | 3 (2-3)                   |                                | 4 (3-5)                           |                                        | 1 (0-1)                    |                                 | 1 (1-2)                            |                                         | 1 (0-1)              |                           | 1 (1-1)                      |                                   |
| 2004 | Qatar            | 3 (2-3)                   |                                | 4 (3-4)                           |                                        | 1 (0-1)                    |                                 | 1 (1-1)                            |                                         | 1 (0-1)              |                           | 1 (1-1)                      |                                   |
| 2005 | Qatar            | 3 (2-3)                   |                                | 4 (3-4)                           |                                        | 1 (0-1)                    |                                 | 1 (1-1)                            |                                         | 1 (0-1)              |                           | 1 (1-1)                      |                                   |
| 2006 | Qatar            | 2 (2-3)                   |                                | 4 (3-4)                           |                                        | 1 (0-1)                    |                                 | 1 (1-1)                            |                                         | 1 (0-1)              |                           | 1 (1-1)                      |                                   |

Spn = *Streptococcus pneumoniae*; npnm = non-pneumonia, non-meningitis; HIV = deaths only in HIV-infected children; Uncertainty range provided in parentheses.

| Year | Country             | Spn pneumonia deaths<br>(UR) | Spn pneumonia deaths,<br>HIV (UR) | Spn pneumonia<br>mortality rate (UR) | Spn pneumonia<br>mortality rate, HIV (UR) | Spn meningitis deaths<br>(UR) | Spn meningitis deaths,<br>HIV (UR) | Spn meningitis<br>mortality rate (UR) | Spn meningitis<br>mortality rate, HIV (UR) | Spn NPNM deaths (UR) | Spn NPNM deaths, HIV<br>(UR) | Spn NPNM mortality<br>rate (UR) | Spn NPNM mortality<br>rate, HIV (UR) |
|------|---------------------|------------------------------|-----------------------------------|--------------------------------------|-------------------------------------------|-------------------------------|------------------------------------|---------------------------------------|--------------------------------------------|----------------------|------------------------------|---------------------------------|--------------------------------------|
| 2007 | Qatar               | 2 (2-3)                      |                                   | 3 (2-4)                              |                                           | 1 (0-1)                       |                                    | 1 (1-1)                               |                                            | 1 (0-1)              |                              | 1 (0-1)                         |                                      |
| 2008 | Qatar               | 3 (2-3)                      |                                   | 3 (2-3)                              |                                           | 1 (0-1)                       |                                    | 1 (0-1)                               |                                            | 1 (0-1)              |                              | 1 (0-1)                         |                                      |
| 2009 | Qatar               | 2 (2-2)                      |                                   | 2 (2-2)                              |                                           | 1 (0-1)                       |                                    | 1 (0-1)                               |                                            | 0 (0-1)              |                              | 1 (0-1)                         |                                      |
| 2010 | Qatar               | 2 (2-2)                      |                                   | 2 (2-2)                              |                                           | 1 (0-1)                       |                                    | 1 (0-1)                               |                                            | 0 (0-1)              |                              | 1 (0-1)                         |                                      |
| 2011 | Qatar               | 2 (1-2)                      |                                   | 2 (1-2)                              |                                           | 0 (0-1)                       |                                    | 0 (0-1)                               |                                            | 0 (0-1)              |                              | 0 (0-1)                         |                                      |
| 2012 | Qatar               | 2 (1-2)                      |                                   | 2 (1-2)                              |                                           | 0 (0-1)                       |                                    | 0 (0-1)                               |                                            | 0 (0-1)              |                              | 0 (0-1)                         |                                      |
| 2013 | Qatar               | 2 (1-2)                      |                                   | 1 (1-1)                              |                                           | 0 (0-1)                       |                                    | 0 (0-0)                               |                                            | 0 (0-0)              |                              | 0 (0-0)                         |                                      |
| 2014 | Qatar               | 1 (1-1)                      |                                   | 1 (1-1)                              |                                           | 0 (0-1)                       |                                    | 0 (0-0)                               |                                            | 0 (0-0)              |                              | 0 (0-0)                         |                                      |
| 2015 | Qatar               | 1 (1-2)                      | 0 (0-0)                           | 1 (1-1)                              | 0 (0-0)                                   | 0 (0-1)                       | 0 (0-0)                            | 0 (0-0)                               | 0 (0-0)                                    | 0 (0-0)              | 0 (0-0)                      | 0 (0-0)                         | 0 (0-0)                              |
| 2000 | Republic of Korea   | 56 (40-58)                   |                                   | 2 (1-2)                              |                                           | 24 (15-33)                    |                                    | 1 (0-1)                               |                                            | 22 (13-30)           |                              | 1 (0-1)                         |                                      |
| 2001 | Republic of Korea   | 49 (35-51)                   |                                   | 2 (1-2)                              |                                           | 20 (12-28)                    |                                    | 1 (0-1)                               |                                            | 18 (11-25)           |                              | 1 (0-1)                         |                                      |
| 2002 | Republic of Korea   | 44 (32-46)                   |                                   | 2 (1-2)                              |                                           | 21 (12-28)                    |                                    | 1 (0-1)                               |                                            | 18 (11-25)           |                              | 1 (0-1)                         |                                      |
| 2003 | Republic of Korea   | 38 (26-37)                   |                                   | 1 (1-1)                              |                                           | 16 (10-22)                    |                                    | 1 (0-1)                               |                                            | 14 (9-20)            |                              | 1 (0-1)                         |                                      |
| 2004 | Republic of Korea   | 25 (18-27)                   |                                   | 1 (1-1)                              |                                           | 17 (10-24)                    |                                    | 1 (0-1)                               |                                            | 15 (9-21)            |                              | 1 (0-1)                         |                                      |
| 2005 | Republic of Korea   | 23 (17-24)                   |                                   | 1 (1-1)                              |                                           | 13 (8-18)                     |                                    | 0 (0-1)                               |                                            | 11 (7-16)            |                              | 0 (0-1)                         |                                      |
| 2006 | Republic of Korea   | 27 (19-28)                   |                                   | 1 (1-1)                              |                                           | 17 (10-23)                    |                                    | 1 (0-1)                               |                                            | 15 (9-21)            |                              | 1 (0-1)                         |                                      |
| 2007 | Republic of Korea   | 20 (14-21)                   |                                   | 1 (1-1)                              |                                           | 20 (12-28)                    |                                    | 1 (0-1)                               |                                            | 18 (11-25)           |                              | 1 (0-1)                         |                                      |
| 2008 | Republic of Korea   | 20 (14-21)                   |                                   | 1 (1-1)                              |                                           | 13 (8-18)                     |                                    | 1 (0-1)                               |                                            | 12 (7-16)            |                              | 0 (0-1)                         |                                      |
| 2009 | Republic of Korea   | 21 (15-21)                   |                                   | 1 (1-1)                              |                                           | 14 (8-19)                     |                                    | 1 (0-1)                               |                                            | 12 (7-17)            |                              | 1 (0-1)                         |                                      |
| 2010 | Republic of Korea   | 19 (14-20)                   |                                   | 1 (1-1)                              |                                           | 14 (8-19)                     |                                    | 1 (0-1)                               |                                            | 13 (8-17)            |                              | 1 (0-1)                         |                                      |
| 2011 | Republic of Korea   | 19 (13-20)                   |                                   | 1 (1-1)                              |                                           | 18 (11-25)                    |                                    | 1 (0-1)                               |                                            | 16 (10-22)           |                              | 1 (0-1)                         |                                      |
| 2012 | Republic of Korea   | 13 (9-13)                    |                                   | 1 (0-1)                              |                                           | 13 (8-18)                     |                                    | 1 (0-1)                               |                                            | 12 (7-16)            |                              | 1 (0-1)                         |                                      |
| 2013 | Republic of Korea   | 14 (10-15)                   |                                   | 1 (0-1)                              |                                           | 13 (8-18)                     |                                    | 1 (0-1)                               |                                            | 11 (7-16)            |                              | 1 (0-1)                         |                                      |
| 2014 | Republic of Korea   | 16 (12-17)                   |                                   | 1 (1-1)                              |                                           | 16 (9-22)                     |                                    | 1 (0-1)                               |                                            | 14 (8-19)            |                              | 1 (0-1)                         |                                      |
| 2015 | Republic of Korea   | 10 (7-11)                    | 0 (0-0)                           | 0 (0-0)                              | 0 (0-0)                                   | 10 (6-14)                     | 0 (0-0)                            | 0 (0-1)                               | 0 (0-0)                                    | 9 (5-12)             | 0 (0-0)                      | 0 (0-1)                         | 0 (0-0)                              |
| 2000 | Republic of Moldova | 60 (43-63)                   |                                   | 25 (18-26)                           |                                           | 4 (1-1)                       |                                    | 2 (1-5)                               |                                            | 3 (1-1)              |                              | 1 (1-4)                         |                                      |
| 2001 | Republic of Moldova | 49 (35-51)                   |                                   | 21 (15-22)                           |                                           | 1 (0-5)                       |                                    | 1 (0-3)                               |                                            | 1 (0-5)              |                              | 1 (0-2)                         |                                      |
| 2002 | Republic of Moldova | 36 (25-37)                   |                                   | 16 (12-17)                           |                                           | 2 (0-8)                       |                                    | 1 (0-4)                               |                                            | 2 (0-7)              |                              | 1 (0-3)                         |                                      |
| 2003 | Republic of Moldova | 33 (23-34)                   |                                   | 15 (11-16)                           |                                           | 2 (0-7)                       |                                    | 1 (0-3)                               |                                            | 1 (0-6)              |                              | 1 (0-3)                         |                                      |
| 2004 | Republic of Moldova | 24 (17-25)                   |                                   | 12 (8-12)                            |                                           | 2 (0-7)                       |                                    | 1 (0-4)                               |                                            | 1 (0-6)              |                              | 1 (0-3)                         |                                      |
| 2005 | Republic of Moldova | 22 (16-23)                   |                                   | 11 (8-12)                            |                                           | 2 (0-10)                      |                                    | 1 (0-5)                               |                                            | 2 (0-9)              |                              | 1 (0-4)                         |                                      |
| 2006 | Republic of Moldova | 24 (17-25)                   |                                   | 12 (8-12)                            |                                           | 1 (0-2)                       |                                    | 0 (0-1)                               |                                            | 0 (0-2)              |                              | 0 (0-1)                         |                                      |
| 2007 | Republic of Moldova | 18 (13-19)                   |                                   | 9 (6-9)                              |                                           | 1 (0-4)                       |                                    | 0 (0-2)                               |                                            | 1 (0-4)              |                              | 0 (0-2)                         |                                      |
| 2008 | Republic of Moldova | 19 (13-20)                   |                                   | 9 (6-9)                              |                                           | 1 (0-5)                       |                                    | 1 (0-3)                               |                                            | 1 (0-5)              |                              | 1 (0-2)                         |                                      |
| 2009 | Republic of Moldova | 20 (14-20)                   |                                   | 9 (7-10)                             |                                           | 2 (0-8)                       |                                    | 1 (0-4)                               |                                            | 2 (0-7)              |                              | 1 (0-3)                         |                                      |
| 2010 | Republic of Moldova | 20 (14-21)                   |                                   | 9 (7-10)                             |                                           | 2 (1-9)                       |                                    | 1 (0-4)                               |                                            | 2 (0-8)              |                              | 1 (0-4)                         |                                      |
| 2011 | Republic of Moldova | 20 (14-21)                   |                                   | 9 (6-9)                              |                                           | 3 (1-13)                      |                                    | 1 (0-6)                               |                                            | 3 (1-11)             |                              | 1 (0-5)                         |                                      |
| 2012 | Republic of Moldova | 18 (13-18)                   |                                   | 8 (6-8)                              |                                           | 2 (1-7)                       |                                    | 1 (0-3)                               |                                            | 2 (0-6)              |                              | 1 (0-3)                         |                                      |
| 2013 | Republic of Moldova | 19 (13-20)                   |                                   | 8 (6-9)                              |                                           | 1 (0-4)                       |                                    | 0 (0-2)                               |                                            | 1 (0-3)              |                              | 0 (0-1)                         |                                      |
| 2014 | Republic of Moldova | 17 (12-17)                   |                                   | 8 (5-8)                              |                                           | 2 (1-6)                       |                                    | 1 (0-3)                               |                                            | 2 (1-6)              |                              | 1 (0-3)                         |                                      |
| 2015 | Republic of Moldova | 12 (9-13)                    | 0 (0-0)                           | 6 (4-6)                              | 0 (0-0)                                   | 1 (1-4)                       | 0 (0-0)                            | 1 (0-2)                               | 0 (0-0)                                    | 1 (0-4)              | 0 (0-0)                      | 1 (0-2)                         | 0 (0-0)                              |
| 2000 | Romania             | 587 (416-611)                |                                   | 53 (38-55)                           |                                           | 42 (19-76)                    |                                    | 4 (2-7)                               |                                            | 37 (17-68)           |                              | 3 (2-6)                         |                                      |
| 2001 | Romania             | 547 (388-570)                |                                   | 48 (34-50)                           |                                           | 42 (19-75)                    |                                    | 4 (2-7)                               |                                            | 37 (17-67)           |                              | 3 (1-6)                         |                                      |
| 2002 | Romania             | 486 (345-506)                |                                   | 42 (30-44)                           |                                           | 43 (20-79)                    |                                    | 4 (2-7)                               |                                            | 39 (17-70)           |                              | 3 (2-6)                         |                                      |
| 2003 | Romania             | 392 (278-408)                |                                   | 35 (25-37)                           |                                           | 28 (13-50)                    |                                    | 2 (1-5)                               |                                            | 25 (11-45)           |                              | 2 (1-4)                         |                                      |
| 2004 | Romania             | 383 (271-399)                |                                   | 36 (25-37)                           |                                           | 20 (9-37)                     |                                    | 2 (1-3)                               |                                            | 18 (8-32)            |                              | 2 (1-3)                         |                                      |
| 2005 | Romania             | 318 (226-332)                |                                   | 30 (22-32)                           |                                           | 18 (8-33)                     |                                    | 2 (1-3)                               |                                            | 16 (7-29)            |                              | 2 (1-3)                         |                                      |
| 2006 | Romania             | 280 (199-292)                |                                   | 27 (19-28)                           |                                           | 16 (7-30)                     |                                    | 2 (1-3)                               |                                            | 15 (7-27)            |                              | 1 (1-3)                         |                                      |
| 2007 | Romania             | 263 (187-274)                |                                   | 26 (18-27)                           |                                           | 16 (7-28)                     |                                    | 2 (1-3)                               |                                            | 14 (6-25)            |                              | 1 (1-2)                         |                                      |
| 2008 | Romania             | 257 (182-268)                |                                   | 25 (18-26)                           |                                           | 10 (5-19)                     |                                    | 1 (0-2)                               |                                            | 9 (4-17)             |                              | 1 (0-2)                         |                                      |
| 2009 | Romania             | 226 (160-236)                |                                   | 22 (15-23)                           |                                           | 9 (4-17)                      |                                    | 1 (0-2)                               |                                            | 8 (4-15)             |                              | 1 (0-1)                         |                                      |
| 2010 | Romania             | 222 (158-231)                |                                   | 21 (15-22)                           |                                           | 11 (5-20)                     |                                    | 1 (0-2)                               |                                            | 10 (4-17)            |                              | 1 (0-2)                         |                                      |
| 2011 | Romania             | 239 (170-249)                |                                   | 23 (16-24)                           |                                           | 14 (6-25)                     |                                    | 1 (1-2)                               |                                            | 12 (6-22)            |                              | 1 (1-2)                         |                                      |
| 2012 | Romania             | 214 (151-223)                |                                   | 21 (15-22)                           |                                           | 7 (3-13)                      |                                    | 1 (0-1)                               |                                            | 6 (3-11)             |                              | 1 (0-1)                         |                                      |
| 2013 | Romania             | 201 (143-210)                |                                   | 21 (15-22)                           |                                           | 10 (4-17)                     |                                    | 1 (0-2)                               |                                            | 8 (4-15)             |                              | 1 (0-2)                         |                                      |
| 2014 | Romania             | 183 (130-191)                |                                   | 20 (14-20)                           |                                           | 9 (4-16)                      |                                    | 1 (0-2)                               |                                            | 8 (4-14)             |                              | 1 (0-1)                         |                                      |
| 2015 | Romania             | 169 (120-177)                | 0 (0-0)                           | 19 (13-19)                           | 0 (0-0)                                   | 8 (4-15)                      | 0 (0-0)                            | 1 (0-2)                               | 0 (0-0)                                    | 7 (3-13)             | 0 (0-0)                      | 1 (0-1)                         | 0 (0-0)                              |
| 2000 | Russian Federation  | 1147 (813-1195)              |                                   | 18 (13-19)                           |                                           | 193 (88-350)                  |                                    | 3 (1-6)                               |                                            | 172 (78-312)         |                              | 3 (1-5)                         |                                      |
| 2001 | Russian Federation  | 1090 (773-1136)              |                                   | 17 (12-17)                           |                                           | 183 (83-331)                  |                                    | 3 (1-5)                               |                                            | 163 (74-295)         |                              | 2 (1-4)                         |                                      |
| 2002 | Russian Federation  | 997 (707-1039)               |                                   | 15 (11-16)                           |                                           | 167 (76-304)                  |                                    | 3 (1-5)                               |                                            | 149 (68-270)         |                              | 2 (1-4)                         |                                      |
| 2003 | Russian Federation  | 876 (621-913)                |                                   | 13 (9-14)                            |                                           | 148 (67-268)                  |                                    | 2 (1-4)                               |                                            | 132 (60-239)         |                              | 2 (1-4)                         |                                      |
| 2004 | Russian Federation  | 790 (560-824)                |                                   | 12 (8-12)                            |                                           | 134 (61-244)                  |                                    | 2 (1-4)                               |                                            | 120 (54-217)         |                              | 2 (1-3)                         |                                      |
| 2005 | Russian Federation  | 706 (501-738)                |                                   | 10 (7-11)                            |                                           | 121 (55-220)                  |                                    | 2 (1-3)                               |                                            | 108 (49-195)         |                              | 2 (1-3)                         |                                      |
| 2006 | Russian Federation  | 632 (448-658)                |                                   | 9 (6-9)                              |                                           | 109 (48-198)                  |                                    | 2 (1-3)                               |                                            | 97 (44-176)          |                              | 1 (1-2)                         |                                      |
| 2007 | Russian Federation  | 562 (399-586)                |                                   | 8 (6-8)                              |                                           | 97 (44-176)                   |                                    | 1 (1-2)                               |                                            | 87 (38-157)          |                              | 1 (1-2)                         |                                      |
| 2008 | Russian Federation  | 509 (361-530)                |                                   | 7 (5-7)                              |                                           | 88 (40-180)                   |                                    | 1 (1-2)                               |                                            | 78 (36-142)          |                              | 1 (0-2)                         |                                      |
| 2009 | Russian Federation  | 477 (338-497)                |                                   | 6 (4-7)                              |                                           | 82 (37-149)                   |                                    | 1 (0-2)                               |                                            | 73 (33-132)          |                              | 1 (0-2)                         |                                      |
| 2010 | Russian Federation  | 452 (320-471)                |                                   | 6 (4-6)                              |                                           | 77 (35-139)                   |                                    | 1 (0-2)                               |                                            | 68 (31-124)          |                              | 1 (0-2)                         |                                      |
| 2011 | Russian Federation  | 425 (302-443)                |                                   | 5 (4-6)                              |                                           | 72 (32-130)                   |                                    | 1 (0-2)                               |                                            | 64 (29-116)          |                              | 1 (0-1)                         |                                      |
| 2012 | Russian Federation  | 392 (278-408)                |                                   | 5 (3-5)                              |                                           | 79 (36-144)                   |                                    | 1 (0-2)                               |                                            | 71 (32-128)          |                              | 1 (0-2)                         |                                      |
| 2013 | Russian Federation  | 385 (280-412)                |                                   | 5 (3-5)                              |                                           | 79 (36-143)                   |                                    | 1 (0-2)                               |                                            | 70 (32-127)          |                              | 1 (0-1)                         |                                      |
| 2014 | Russian Federation  | 382 (271-399)                |                                   | 4 (3-5)                              |                                           | 75 (34-136)                   |                                    | 1 (0-2)                               |                                            | 67 (30-121)          |                              | 1 (0-1)                         |                                      |
| 2015 | Russian Federation  | 373 (264-388)                | 3 (2-3)                           | 4 (3-4)                              | 0 (0-0)                                   | 72 (33-131)                   | 1 (0-1)                            | 1 (0-1)                               | 0 (0-0)                                    | 64 (29-116)          | 1 (0-1)                      | 1 (0-1)                         | 0 (0-0)                              |
| 2000 | Rwanda              | 3935 (2791-4101)             |                                   | 300 (213-313)                        |                                           | 819 (409-1635)                |                                    | 62 (31-125)                           |                                            | 258 (128-514)        |                              | 20 (10-39)                      |                                      |
| 2001 | Rwanda              | 4037 (2863-4207)             |                                   | 284 (201-296)                        |                                           | 833 (420-1659)                |                                    | 59 (30-117)                           |                                            | 262 (132-522)        |                              | 18 (9-37)                       |                                      |
| 2002 | Rwanda              | 3567 (2530-3718)             |                                   | 242 (172-252)                        |                                           | 729 (372-1448)                |                                    | 49 (25-98)                            |                                            | 229 (117-455)        |                              | 16 (8-31)                       |                                      |
| 2003 | Rwanda              | 3222 (2285-3358)             |                                   | 219 (156-229)                        |                                           | 653 (220-1468)                |                                    | 44 (15-101)                           |                                            | 205 (89-468)         |                              | 14 (6-32)                       |                                      |
| 2004 | Rwanda              | 2763 (1959-2879)             |                                   | 190 (135-198)                        |                                           | 554 (190-1280)                |                                    | 38 (13-87)                            |                                            | 174 (60-396)         |                              | 12 (4-27)                       |                                      |
| 2005 | Rwanda              | 2407 (1707-2508)             |                                   | 165 (117-172)                        |                                           | 478 (167-1083)                |                                    | 33 (11-74)                            |                                            | 150 (52-340)         |                              | 10 (4-23)                       |                                      |
| 2006 | Rwanda              | 2121 (1504-2210)             |                                   | 143 (102-149)                        |                                           | 416 (145-942)                 |                                    | 28 (10-64)                            |                                            | 131 (46-296)         |                              | 9 (3-20)                        |                                      |
| 2007 | Rwanda              | 1895 (1344-1975)             |                                   | 125 (89-130)                         |                                           | 367 (128-830)                 |                                    | 24 (8-55)                             |                                            | 115 (40-261)         |                              | 8 (3-17)                        |                                      |
| 2008 | Rwanda              | 1709 (1212-1781)             |                                   | 109 (77-113)                         |                                           | 327 (113-737)                 |                                    | 21 (7-47)                             |                                            | 103 (36-232)         |                              | 7 (2-15)                        |                                      |
| 2009 | Rwanda              | 1548 (1098-1613)             |                                   | 96 (68-100)                          |                                           | 294 (93-666)                  |                                    | 18 (6-41)                             |                                            | 262 (85-593)         |                              | 16 (5-37)                       |                                      |
| 2010 | Rwanda              | 1204 (854-1255)              |                                   | 79 (52-76)                           |                                           | 223 (78-491)                  |                                    | 13 (5-30)                             |                                            | 198 (70-437)         |                              | 12 (4-26)                       |                                      |
| 2011 | Rwanda              | 880 (624-917)                |                                   | 52 (37-54)                           |                                           | 158 (56-345)                  |                                    | 9 (3-20)                              |                                            | 141 (50-307)         |                              | 8 (3-18)                        |                                      |
| 2012 | Rwanda              | 590 (418-615)                |                                   | 35 (25-36)                           |                                           | 104 (37-225)                  |                                    | 6 (2-13)                              |                                            | 92 (33-200)          |                              | 5 (2-12)                        |                                      |
| 2013 | Rwanda              | 457 (324-476)                |                                   | 27 (19-28)                           |                                           | 82 (30-177)                   |                                    | 5 (2-10)                              |                                            | 73 (26-157)          |                              | 4 (2-9)                         |                                      |
| 2014 | Rwanda              | 304 (215-317)                |                                   | 18 (13-19)                           |                                           | 54 (20-116)                   |                                    | 3 (1-7)                               |                                            | 48 (18-103)          |                              | 3 (1-6)                         |                                      |

Spn = *Streptococcus pneumoniae*; npnm = non-pneumonia, non-meningitis; HIV = deaths only in HIV-infected children; Uncertainty range provided in parentheses.

| Year | Country                          | Spn pneumonia deaths (UR) | Spn pneumonia deaths, HIV (UR) | Spn pneumonia mortality rate (UR) | Spn pneumonia mortality rate, HIV (UR) | Spn meningitis deaths (UR) | Spn meningitis deaths, HIV (UR) | Spn meningitis mortality rate (UR) | Spn meningitis mortality rate, HIV (UR) | Spn NPNM deaths (UR) | Spn NPNM deaths, HIV (UR) | Spn NPNM mortality rate (UR) | Spn NPNM mortality rate, HIV (UR) |
|------|----------------------------------|---------------------------|--------------------------------|-----------------------------------|----------------------------------------|----------------------------|---------------------------------|------------------------------------|-----------------------------------------|----------------------|---------------------------|------------------------------|-----------------------------------|
| 2015 | Rwanda                           | 244 (173-254)             |                                | 4 (3-4)                           | 15 (10-15)                             | 44 (16-94)                 |                                 | 1 (0-1)                            | 3 (1-6)                                 | 39 (14-83)           |                           | 1 (0-1)                      | 2 (1-5)                           |
| 2000 | Saint Kitts and Nevis            | 0 (0-0)                   |                                | 4 (2-4)                           | 0 (0-0)                                | 0 (0-0)                    |                                 | 0 (0-0)                            | 0 (0-0)                                 | 0 (0-0)              |                           | 0 (0-0)                      | 0 (0-0)                           |
| 2001 | Saint Kitts and Nevis            | 0 (0-0)                   |                                | 6 (4-6)                           | 0 (0-0)                                | 0 (0-0)                    |                                 | 0 (0-0)                            | 0 (0-0)                                 | 0 (0-0)              |                           | 0 (0-0)                      | 0 (0-0)                           |
| 2002 | Saint Kitts and Nevis            | 0 (0-0)                   |                                | 6 (5-7)                           | 0 (0-0)                                | 0 (0-0)                    |                                 | 0 (0-0)                            | 0 (0-0)                                 | 0 (0-0)              |                           | 0 (0-0)                      | 0 (0-0)                           |
| 2003 | Saint Kitts and Nevis            | 0 (0-0)                   |                                | 6 (4-6)                           | 0 (0-0)                                | 0 (0-0)                    |                                 | 0 (0-0)                            | 0 (0-0)                                 | 0 (0-0)              |                           | 0 (0-0)                      | 0 (0-0)                           |
| 2004 | Saint Kitts and Nevis            | 0 (0-0)                   |                                | 4 (2-4)                           | 0 (0-0)                                | 0 (0-0)                    |                                 | 0 (0-0)                            | 0 (0-0)                                 | 0 (0-0)              |                           | 0 (0-0)                      | 0 (0-0)                           |
| 2005 | Saint Kitts and Nevis            | 0 (0-0)                   |                                | 2 (2-2)                           | 0 (0-0)                                | 0 (0-0)                    |                                 | 0 (0-0)                            | 0 (0-0)                                 | 0 (0-0)              |                           | 0 (0-0)                      | 0 (0-0)                           |
| 2006 | Saint Kitts and Nevis            | 0 (0-0)                   |                                | 2 (1-2)                           | 0 (0-0)                                | 0 (0-0)                    |                                 | 0 (0-0)                            | 0 (0-0)                                 | 0 (0-0)              |                           | 0 (0-0)                      | 0 (0-0)                           |
| 2007 | Saint Kitts and Nevis            | 0 (0-0)                   |                                | 2 (1-2)                           | 0 (0-0)                                | 0 (0-0)                    |                                 | 0 (0-0)                            | 0 (0-0)                                 | 0 (0-0)              |                           | 0 (0-0)                      | 0 (0-0)                           |
| 2008 | Saint Kitts and Nevis            | 0 (0-0)                   |                                | 0 (0-0)                           | 0 (0-0)                                | 0 (0-0)                    |                                 | 0 (0-0)                            | 0 (0-0)                                 | 0 (0-0)              |                           | 0 (0-0)                      | 0 (0-0)                           |
| 2009 | Saint Kitts and Nevis            | 0 (0-0)                   |                                | 0 (0-0)                           | 0 (0-0)                                | 0 (0-0)                    |                                 | 0 (0-0)                            | 0 (0-0)                                 | 0 (0-0)              |                           | 0 (0-0)                      | 0 (0-0)                           |
| 2010 | Saint Kitts and Nevis            | 0 (0-0)                   |                                | 0 (0-0)                           | 0 (0-0)                                | 0 (0-0)                    |                                 | 0 (0-0)                            | 0 (0-0)                                 | 0 (0-0)              |                           | 0 (0-0)                      | 0 (0-0)                           |
| 2011 | Saint Kitts and Nevis            | 0 (0-0)                   |                                | 0 (0-0)                           | 0 (0-0)                                | 0 (0-0)                    |                                 | 0 (0-0)                            | 0 (0-0)                                 | 0 (0-0)              |                           | 0 (0-0)                      | 0 (0-0)                           |
| 2012 | Saint Kitts and Nevis            | 0 (0-0)                   |                                | 0 (0-0)                           | 0 (0-0)                                | 0 (0-0)                    |                                 | 0 (0-0)                            | 0 (0-0)                                 | 0 (0-0)              |                           | 0 (0-0)                      | 0 (0-0)                           |
| 2013 | Saint Kitts and Nevis            | 0 (0-0)                   |                                | 0 (0-0)                           | 0 (0-0)                                | 0 (0-1)                    |                                 | 7 (3-11)                           | 0 (0-0)                                 | 0 (0-0)              |                           | 6 (3-10)                     | 0 (0-0)                           |
| 2014 | Saint Kitts and Nevis            | 0 (0-0)                   |                                | 0 (0-0)                           | 0 (0-0)                                | 0 (0-0)                    |                                 | 4 (2-7)                            | 0 (0-0)                                 | 0 (0-0)              |                           | 4 (2-6)                      | 0 (0-0)                           |
| 2015 | Saint Kitts and Nevis            | 0 (0-0)                   | 0 (0-0)                        | 0 (0-0)                           | 0 (0-0)                                | 0 (0-0)                    | 0 (0-0)                         | 4 (2-7)                            | 0 (0-0)                                 | 0 (0-0)              | 0 (0-0)                   | 4 (2-6)                      | 0 (0-0)                           |
| 2000 | Saint Lucia                      |                           | 1 (1-1)                        |                                   | 5 (3-5)                                |                            | 0 (0-0)                         |                                    | 1 (1-2)                                 |                      | 0 (0-0)                   |                              | 1 (1-2)                           |
| 2001 | Saint Lucia                      |                           | 1 (1-1)                        |                                   | 6 (4-6)                                |                            | 0 (0-0)                         |                                    | 1 (0-1)                                 |                      | 0 (0-0)                   |                              | 1 (0-1)                           |
| 2002 | Saint Lucia                      |                           | 1 (1-1)                        |                                   | 6 (4-6)                                |                            | 0 (0-0)                         |                                    | 1 (1-2)                                 |                      | 0 (0-0)                   |                              | 1 (1-2)                           |
| 2003 | Saint Lucia                      |                           | 1 (1-1)                        |                                   | 6 (4-6)                                |                            | 0 (0-0)                         |                                    | 1 (1-2)                                 |                      | 0 (0-0)                   |                              | 1 (1-2)                           |
| 2004 | Saint Lucia                      |                           | 1 (1-1)                        |                                   | 7 (5-8)                                |                            | 0 (0-0)                         |                                    | 1 (1-2)                                 |                      | 0 (0-0)                   |                              | 1 (1-2)                           |
| 2005 | Saint Lucia                      |                           | 1 (1-1)                        |                                   | 9 (7-10)                               |                            | 0 (0-0)                         |                                    | 0 (0-0)                                 |                      | 0 (0-0)                   |                              | 0 (0-0)                           |
| 2006 | Saint Lucia                      |                           | 2 (1-2)                        |                                   | 12 (9-13)                              |                            | 0 (0-0)                         |                                    | 1 (0-1)                                 |                      | 0 (0-0)                   |                              | 0 (0-1)                           |
| 2007 | Saint Lucia                      |                           | 1 (1-2)                        |                                   | 11 (8-11)                              |                            | 0 (0-0)                         |                                    | 1 (0-1)                                 |                      | 0 (0-0)                   |                              | 1 (0-1)                           |
| 2008 | Saint Lucia                      |                           | 1 (1-1)                        |                                   | 8 (6-8)                                |                            | 0 (0-0)                         |                                    | 0 (0-0)                                 |                      | 0 (0-0)                   |                              | 0 (0-1)                           |
| 2009 | Saint Lucia                      |                           | 1 (1-1)                        |                                   | 9 (6-9)                                |                            | 0 (0-1)                         |                                    | 2 (1-4)                                 |                      | 0 (0-0)                   |                              | 2 (1-3)                           |
| 2010 | Saint Lucia                      |                           | 1 (1-1)                        |                                   | 8 (5-8)                                |                            | 0 (0-0)                         |                                    | 2 (1-3)                                 |                      | 0 (0-0)                   |                              | 2 (1-3)                           |
| 2011 | Saint Lucia                      |                           | 1 (1-1)                        |                                   | 5 (4-6)                                |                            | 0 (0-0)                         |                                    | 2 (1-4)                                 |                      | 0 (0-0)                   |                              | 2 (1-3)                           |
| 2012 | Saint Lucia                      |                           | 0 (0-0)                        |                                   | 3 (2-3)                                |                            | 0 (0-0)                         |                                    | 1 (0-1)                                 |                      | 0 (0-0)                   |                              | 1 (0-1)                           |
| 2013 | Saint Lucia                      |                           | 0 (0-0)                        |                                   | 3 (2-3)                                |                            | 0 (0-0)                         |                                    | 1 (1-2)                                 |                      | 0 (0-0)                   |                              | 1 (1-2)                           |
| 2014 | Saint Lucia                      |                           | 1 (0-1)                        |                                   | 5 (4-5)                                |                            | 0 (0-0)                         |                                    | 2 (1-3)                                 |                      | 0 (0-0)                   |                              | 2 (1-3)                           |
| 2015 | Saint Lucia                      |                           | 1 (0-1)                        | 0 (0-0)                           | 5 (3-5)                                |                            | 0 (0-0)                         | 0 (0-0)                            | 2 (1-3)                                 |                      | 0 (0-0)                   | 0 (0-0)                      | 2 (1-3)                           |
| 2000 | Saint Vincent and the Grenadines |                           | 1 (0-1)                        |                                   | 5 (4-5)                                |                            | 0 (0-0)                         |                                    | 2 (1-3)                                 |                      | 0 (0-0)                   |                              | 2 (1-3)                           |
| 2001 | Saint Vincent and the Grenadines |                           | 1 (0-1)                        |                                   | 5 (4-5)                                |                            | 0 (0-0)                         |                                    | 1 (1-2)                                 |                      | 0 (0-0)                   |                              | 1 (1-2)                           |
| 2002 | Saint Vincent and the Grenadines |                           | 0 (0-0)                        |                                   | 3 (2-3)                                |                            | 0 (0-0)                         |                                    | 0 (0-0)                                 |                      | 0 (0-0)                   |                              | 0 (0-0)                           |
| 2003 | Saint Vincent and the Grenadines |                           | 0 (0-0)                        |                                   | 2 (1-2)                                |                            | 0 (0-0)                         |                                    | 0 (0-0)                                 |                      | 0 (0-0)                   |                              | 0 (0-0)                           |
| 2004 | Saint Vincent and the Grenadines |                           | 0 (0-0)                        |                                   | 4 (3-4)                                |                            | 0 (0-0)                         |                                    | 0 (0-0)                                 |                      | 0 (0-0)                   |                              | 0 (0-0)                           |
| 2005 | Saint Vincent and the Grenadines |                           | 0 (0-0)                        |                                   | 4 (3-4)                                |                            | 0 (0-0)                         |                                    | 0 (0-0)                                 |                      | 0 (0-0)                   |                              | 0 (0-0)                           |
| 2006 | Saint Vincent and the Grenadines |                           | 0 (0-0)                        |                                   | 5 (4-5)                                |                            | 0 (0-0)                         |                                    | 0 (0-0)                                 |                      | 0 (0-0)                   |                              | 0 (0-0)                           |
| 2007 | Saint Vincent and the Grenadines |                           | 0 (0-0)                        |                                   | 1 (1-1)                                |                            | 0 (0-0)                         |                                    | 0 (0-0)                                 |                      | 0 (0-0)                   |                              | 0 (0-0)                           |
| 2008 | Saint Vincent and the Grenadines |                           | 0 (0-0)                        |                                   | 1 (1-1)                                |                            | 0 (0-0)                         |                                    | 0 (0-0)                                 |                      | 0 (0-0)                   |                              | 0 (0-0)                           |
| 2009 | Saint Vincent and the Grenadines |                           | 0 (0-0)                        |                                   | 5 (3-5)                                |                            | 0 (0-0)                         |                                    | 0 (0-0)                                 |                      | 0 (0-0)                   |                              | 0 (0-0)                           |
| 2010 | Saint Vincent and the Grenadines |                           | 0 (0-0)                        |                                   | 5 (3-5)                                |                            | 0 (0-0)                         |                                    | 0 (0-0)                                 |                      | 0 (0-0)                   |                              | 0 (0-0)                           |
| 2011 | Saint Vincent and the Grenadines |                           | 1 (1-1)                        |                                   | 9 (7-10)                               |                            | 0 (0-0)                         |                                    | 0 (0-0)                                 |                      | 0 (0-0)                   |                              | 0 (0-0)                           |
| 2012 | Saint Vincent and the Grenadines |                           | 1 (1-1)                        |                                   | 8 (6-8)                                |                            | 0 (0-0)                         |                                    | 0 (0-0)                                 |                      | 0 (0-0)                   |                              | 0 (0-0)                           |
| 2013 | Saint Vincent and the Grenadines |                           | 1 (1-1)                        |                                   | 10 (7-10)                              |                            | 0 (0-0)                         |                                    | 0 (0-0)                                 |                      | 0 (0-0)                   |                              | 0 (0-0)                           |
| 2014 | Saint Vincent and the Grenadines |                           | 1 (0-1)                        |                                   | 8 (6-8)                                |                            | 0 (0-0)                         |                                    | 0 (0-0)                                 |                      | 0 (0-0)                   |                              | 0 (0-0)                           |
| 2015 | Saint Vincent and the Grenadines |                           | 1 (0-1)                        | 0 (0-0)                           | 7 (5-7)                                |                            | 0 (0-0)                         | 0 (0-0)                            | 0 (0-0)                                 |                      | 0 (0-0)                   | 0 (0-0)                      | 0 (0-0)                           |
| 2000 | Samoa                            |                           | 4 (3-4)                        |                                   | 15 (11-16)                             |                            | 0 (0-1)                         |                                    | 2 (1-3)                                 |                      | 0 (0-1)                   |                              | 2 (1-3)                           |
| 2001 | Samoa                            |                           | 4 (3-4)                        |                                   | 14 (10-15)                             |                            | 0 (0-1)                         |                                    | 2 (1-3)                                 |                      | 0 (0-1)                   |                              | 2 (1-3)                           |
| 2002 | Samoa                            |                           | 3 (2-3)                        |                                   | 13 (9-14)                              |                            | 0 (0-1)                         |                                    | 2 (1-3)                                 |                      | 0 (0-1)                   |                              | 1 (1-3)                           |
| 2003 | Samoa                            |                           | 3 (2-3)                        |                                   | 12 (9-13)                              |                            | 0 (0-1)                         |                                    | 2 (1-3)                                 |                      | 0 (0-1)                   |                              | 1 (1-2)                           |
| 2004 | Samoa                            |                           | 3 (2-3)                        |                                   | 11 (8-12)                              |                            | 0 (0-1)                         |                                    | 1 (1-2)                                 |                      | 0 (0-1)                   |                              | 1 (1-2)                           |
| 2005 | Samoa                            |                           | 3 (2-3)                        |                                   | 11 (8-11)                              |                            | 0 (0-1)                         |                                    | 1 (1-2)                                 |                      | 0 (0-0)                   |                              | 1 (1-2)                           |
| 2006 | Samoa                            |                           | 2 (2-3)                        |                                   | 10 (7-10)                              |                            | 0 (0-1)                         |                                    | 1 (1-2)                                 |                      | 0 (0-0)                   |                              | 1 (0-2)                           |
| 2007 | Samoa                            |                           | 2 (2-3)                        |                                   | 10 (7-10)                              |                            | 0 (0-1)                         |                                    | 1 (1-2)                                 |                      | 0 (0-0)                   |                              | 1 (0-2)                           |
| 2008 | Samoa                            |                           | 2 (2-2)                        |                                   | 9 (6-10)                               |                            | 0 (0-1)                         |                                    | 1 (1-2)                                 |                      | 0 (0-1)                   |                              | 1 (1-2)                           |
| 2009 | Samoa                            |                           | 3 (2-3)                        |                                   | 10 (7-11)                              |                            | 0 (0-1)                         |                                    | 2 (1-3)                                 |                      | 0 (0-1)                   |                              | 2 (1-3)                           |
| 2010 | Samoa                            |                           | 3 (2-3)                        |                                   | 12 (8-12)                              |                            | 1 (0-1)                         |                                    | 2 (1-4)                                 |                      | 1 (0-1)                   |                              | 2 (1-4)                           |
| 2011 | Samoa                            |                           | 3 (2-3)                        |                                   | 11 (8-12)                              |                            | 1 (0-1)                         |                                    | 2 (1-4)                                 |                      | 1 (0-1)                   |                              | 2 (1-4)                           |
| 2012 | Samoa                            |                           | 3 (2-3)                        |                                   | 11 (8-12)                              |                            | 1 (0-1)                         |                                    | 2 (1-4)                                 |                      | 1 (0-1)                   |                              | 2 (1-4)                           |
| 2013 | Samoa                            |                           | 3 (2-3)                        |                                   | 11 (8-11)                              |                            | 1 (0-1)                         |                                    | 2 (1-4)                                 |                      | 0 (0-1)                   |                              | 2 (1-4)                           |
| 2014 | Samoa                            |                           | 3 (2-3)                        |                                   | 11 (8-11)                              |                            | 0 (0-1)                         |                                    | 2 (1-4)                                 |                      | 0 (0-1)                   |                              | 2 (1-3)                           |
| 2015 | Samoa                            |                           | 2 (2-2)                        | 0 (0-0)                           | 10 (7-10)                              |                            | 0 (0-1)                         | 0 (0-0)                            | 2 (1-4)                                 |                      | 0 (0-1)                   | 0 (0-0)                      | 2 (1-3)                           |
| 2000 | San Marino                       |                           | 2 (2-2)                        |                                   | 2 (2-2)                                |                            | 0 (0-0)                         |                                    | 1 (1-2)                                 |                      | 0 (0-0)                   |                              | 1 (0-2)                           |
| 2001 | San Marino                       |                           | 0 (0-0)                        |                                   | 2 (2-2)                                |                            | 0 (0-0)                         |                                    | 1 (0-2)                                 |                      | 0 (0-0)                   |                              | 1 (0-2)                           |
| 2002 | San Marino                       |                           | 0 (0-0)                        |                                   | 2 (1-2)                                |                            | 0 (0-0)                         |                                    | 1 (0-2)                                 |                      | 0 (0-0)                   |                              | 1 (0-1)                           |
| 2003 | San Marino                       |                           | 0 (0-0)                        |                                   | 2 (1-2)                                |                            | 0 (0-0)                         |                                    | 1 (0-1)                                 |                      | 0 (0-0)                   |                              | 1 (0-1)                           |
| 2004 | San Marino                       |                           | 0 (0-0)                        |                                   | 1 (1-1)                                |                            | 0 (0-0)                         |                                    | 1 (0-1)                                 |                      | 0 (0-0)                   |                              | 1 (0-1)                           |
| 2005 | San Marino                       |                           | 0 (0-0)                        |                                   | 1 (1-1)                                |                            | 0 (0-0)                         |                                    | 1 (0-1)                                 |                      | 0 (0-0)                   |                              | 0 (0-1)                           |
| 2006 | San Marino                       |                           | 0 (0-0)                        |                                   | 1 (1-1)                                |                            | 0 (0-0)                         |                                    | 1 (0-1)                                 |                      | 0 (0-0)                   |                              | 0 (0-1)                           |
| 2007 | San Marino                       |                           | 0 (0-0)                        |                                   | 1 (1-1)                                |                            | 0 (0-0)                         |                                    | 1 (0-1)                                 |                      | 0 (0-0)                   |                              | 0 (0-1)                           |
| 2008 | San Marino                       |                           | 0 (0-0)                        |                                   | 1 (1-1)                                |                            | 0 (0-0)                         |                                    | 1 (0-1)                                 |                      | 0 (0-0)                   |                              | 0 (0-1)                           |
| 2009 | San Marino                       |                           | 0 (0-0)                        |                                   | 1 (1-1)                                |                            | 0 (0-0)                         |                                    | 1 (0-1)                                 |                      | 0 (0-0)                   |                              | 0 (0-1)                           |
| 2010 | San Marino                       |                           | 0 (0-0)                        |                                   | 1 (1-1)                                |                            | 0 (0-0)                         |                                    | 1 (0-1)                                 |                      | 0 (0-0)                   |                              | 0 (0-1)                           |
| 2011 | San Marino                       |                           | 0 (0-0)                        |                                   | 1 (1-1)                                |                            | 0 (0-0)                         |                                    | 1 (0-1)                                 |                      | 0 (0-0)                   |                              | 0 (0-1)                           |
| 2012 | San Marino                       |                           | 0 (0-0)                        |                                   | 1 (1-1)                                |                            | 0 (0-0)                         |                                    | 1 (0-1)                                 |                      | 0 (0-0)                   |                              | 0 (0-1)                           |
| 2013 | San Marino                       |                           | 0 (0-0)                        |                                   | 1 (1-1)                                |                            | 0 (0-0)                         |                                    | 1 (0-1)                                 |                      | 0 (0-0)                   |                              | 0 (0-1)                           |
| 2014 | San Marino                       |                           | 0 (0-0)                        |                                   | 1 (1-1)                                |                            | 0 (0-0)                         |                                    | 1 (0-1)                                 |                      | 0 (0-0)                   |                              | 0 (0-1)                           |
| 2015 | San Marino                       |                           | 0 (0-0)                        | 0 (0-0)                           | 1 (1-1)                                |                            | 0 (0-0)                         | 0 (0-0)                            | 1 (0-1)                                 |                      | 0 (0-0)                   | 0 (0-0)                      | 0 (0-1)                           |
| 2000 | Sao Tome and Principe            |                           | 28 (20-29)                     |                                   | 127 (90-132)                           |                            | 4 (2-9)                         |                                    | 20 (8-43)                               |                      | 1 (1-3)                   |                              | 6 (3-13)                          |
| 2001 | Sao Tome and Principe            |                           | 28 (20-29)                     |                                   | 120 (85-125)                           |                            | 4 (2-9)                         |                                    | 19 (8-40)                               |                      | 1 (1-3)                   |                              | 6 (2-13)                          |
| 2002 | Sao Tome and Principe            |                           | 27 (19-28)                     |                                   | 114 (81-119)                           |                            | 4 (2-9)                         |                                    | 18 (8-38)                               |                      | 1 (1-3)                   |                              | 6 (2-12)                          |
| 2003 | Sao Tome and Principe            |                           | 26 (18-27)                     |                                   | 107 (76-112)                           |                            | 4 (2-9)                         |                                    | 17 (8-35)                               |                      | 1 (1-3)                   |                              | 5 (2-11)                          |
| 2004 | Sao Tome and Principe            |                           | 25 (18-26)                     |                                   | 100 (71-105)                           |                            | 4 (2-8)                         |                                    | 16 (6-34)                               |                      | 4 (1-7)                   |                              | 14 (6-30)                         |
| 2005 | Sao Tome and Principe            |                           | 24 (17-25)                     |                                   | 95 (67-98)                             |                            | 4 (2-8)                         |                                    | 15 (6-31)                               |                      | 3 (1-7)                   |                              | 14 (6-28)                         |
| 2006 | Sao Tome and Principe            |                           | 23 (16-24)                     |                                   | 89 (63-93)                             |                            | 4 (2-7)                         |                                    | 14 (6-29)                               |                      | 3 (1-7)                   |                              | 13 (5-26)                         |

Spn = *Streptococcus pneumoniae*; npnm = non-pneumonia, non-meningitis; HIV = deaths only in HIV-infected children; Uncertainty range provided in parentheses.

| Year | Country               | Spn pneumonia deaths (UR) | Spn pneumonia deaths, HIV (UR) | Spn pneumonia mortality rate (UR) | Spn pneumonia mortality rate, HIV (UR) | Spn meningitis deaths (UR) | Spn meningitis deaths, HIV (UR) | Spn meningitis mortality rate (UR) | Spn meningitis mortality rate, HIV (UR) | Spn NPNM deaths (UR) | Spn NPNM deaths, HIV (UR) | Spn NPNM mortality rate (UR) | Spn NPNM mortality rate, HIV (UR) |
|------|-----------------------|---------------------------|--------------------------------|-----------------------------------|----------------------------------------|----------------------------|---------------------------------|------------------------------------|-----------------------------------------|----------------------|---------------------------|------------------------------|-----------------------------------|
| 2007 | Sao Tome and Principe | 22 (16-23)                |                                | 84 (59-87)                        |                                        | 4 (2-7)                    |                                 | 14 (6-27)                          |                                         | 3 (1-6)              |                           | 12 (5-24)                    |                                   |
| 2008 | Sao Tome and Principe | 22 (16-23)                |                                | 83 (59-86)                        |                                        | 4 (2-7)                    |                                 | 13 (6-26)                          |                                         | 3 (1-6)              |                           | 12 (6-23)                    |                                   |
| 2009 | Sao Tome and Principe | 20 (14-21)                |                                | 76 (54-79)                        |                                        | 3 (2-6)                    |                                 | 12 (6-24)                          |                                         | 3 (1-6)              |                           | 11 (5-21)                    |                                   |
| 2010 | Sao Tome and Principe | 20 (14-21)                |                                | 74 (52-77)                        |                                        | 3 (2-6)                    |                                 | 12 (6-24)                          |                                         | 3 (1-6)              |                           | 11 (5-20)                    |                                   |
| 2011 | Sao Tome and Principe | 20 (14-20)                |                                | 71 (51-74)                        |                                        | 3 (1-6)                    |                                 | 12 (5-22)                          |                                         | 3 (1-5)              |                           | 10 (5-19)                    |                                   |
| 2012 | Sao Tome and Principe | 19 (14-20)                |                                | 69 (49-72)                        |                                        | 3 (1-6)                    |                                 | 11 (5-21)                          |                                         | 3 (1-5)              |                           | 10 (5-19)                    |                                   |
| 2013 | Sao Tome and Principe | 12 (9-13)                 |                                | 43 (31-45)                        |                                        | 2 (1-3)                    |                                 | 6 (3-12)                           |                                         | 2 (1-3)              |                           | 6 (3-11)                     |                                   |
| 2014 | Sao Tome and Principe | 10 (7-10)                 |                                | 35 (25-36)                        |                                        | 1 (1-3)                    |                                 | 5 (2-10)                           |                                         | 1 (1-2)              |                           | 5 (2-9)                      |                                   |
| 2015 | Sao Tome and Principe | 8 (6-9)                   | 0 (0-0)                        | 29 (21-30)                        | 0 (0-0)                                | 1 (1-2)                    | 0 (0-0)                         | 5 (2-9)                            | 0 (0-0)                                 | 1 (1-2)              | 0 (0-0)                   | 4 (2-8)                      | 0 (0-0)                           |
| 2000 | Saudi Arabia          | 407 (289-424)             |                                | 15 (10-15)                        |                                        | 52 (31-72)                 |                                 | 2 (1-3)                            |                                         | 46 (28-64)           |                           | 2 (1-2)                      |                                   |
| 2001 | Saudi Arabia          | 375 (266-390)             |                                | 14 (10-14)                        |                                        | 48 (29-67)                 |                                 | 2 (1-2)                            |                                         | 43 (26-59)           |                           | 2 (1-2)                      |                                   |
| 2002 | Saudi Arabia          | 380 (269-396)             |                                | 14 (10-14)                        |                                        | 72 (43-99)                 |                                 | 3 (2-4)                            |                                         | 64 (39-88)           |                           | 2 (1-3)                      |                                   |
| 2003 | Saudi Arabia          | 365 (259-380)             |                                | 13 (9-14)                         |                                        | 70 (42-97)                 |                                 | 3 (2-4)                            |                                         | 62 (37-86)           |                           | 2 (1-3)                      |                                   |
| 2004 | Saudi Arabia          | 341 (242-355)             |                                | 13 (9-13)                         |                                        | 66 (40-91)                 |                                 | 2 (1-3)                            |                                         | 59 (35-81)           |                           | 2 (1-3)                      |                                   |
| 2005 | Saudi Arabia          | 325 (231-339)             |                                | 12 (8-12)                         |                                        | 63 (38-87)                 |                                 | 2 (1-3)                            |                                         | 56 (34-78)           |                           | 2 (1-3)                      |                                   |
| 2006 | Saudi Arabia          | 309 (219-322)             |                                | 11 (8-12)                         |                                        | 60 (36-83)                 |                                 | 2 (1-3)                            |                                         | 54 (32-74)           |                           | 2 (1-3)                      |                                   |
| 2007 | Saudi Arabia          | 303 (215-316)             |                                | 11 (8-11)                         |                                        | 60 (36-83)                 |                                 | 2 (1-3)                            |                                         | 54 (32-74)           |                           | 2 (1-3)                      |                                   |
| 2008 | Saudi Arabia          | 287 (204-299)             |                                | 10 (7-11)                         |                                        | 58 (35-80)                 |                                 | 2 (1-3)                            |                                         | 52 (31-71)           |                           | 2 (1-3)                      |                                   |
| 2009 | Saudi Arabia          | 236 (168-246)             |                                | 8 (6-9)                           |                                        | 49 (29-68)                 |                                 | 2 (1-2)                            |                                         | 44 (26-60)           |                           | 2 (1-2)                      |                                   |
| 2010 | Saudi Arabia          | 182 (129-189)             |                                | 6 (4-6)                           |                                        | 39 (24-54)                 |                                 | 1 (1-2)                            |                                         | 35 (21-48)           |                           | 1 (1-2)                      |                                   |
| 2011 | Saudi Arabia          | 135 (96-141)              |                                | 5 (3-5)                           |                                        | 31 (18-42)                 |                                 | 1 (1-1)                            |                                         | 27 (16-38)           |                           | 1 (1-1)                      |                                   |
| 2012 | Saudi Arabia          | 119 (85-125)              |                                | 4 (3-4)                           |                                        | 28 (17-39)                 |                                 | 1 (1-1)                            |                                         | 25 (15-35)           |                           | 1 (0-1)                      |                                   |
| 2013 | Saudi Arabia          | 89 (63-92)                |                                | 3 (2-3)                           |                                        | 21 (13-29)                 |                                 | 1 (0-1)                            |                                         | 19 (11-26)           |                           | 1 (0-1)                      |                                   |
| 2014 | Saudi Arabia          | 78 (56-82)                |                                | 3 (2-3)                           |                                        | 19 (11-26)                 |                                 | 1 (0-1)                            |                                         | 17 (10-23)           |                           | 1 (0-1)                      |                                   |
| 2015 | Saudi Arabia          | 73 (52-76)                | 0 (0-0)                        | 2 (2-2)                           | 0 (0-0)                                | 11 (7-24)                  | 0 (0-0)                         | 1 (0-1)                            | 0 (0-0)                                 | 16 (9-22)            | 0 (0-0)                   | 1 (0-1)                      | 0 (0-0)                           |
| 2000 | Senegal               | 2951 (2093-3076)          |                                | 178 (126-186)                     |                                        | 471 (162-1047)             |                                 | 28 (10-64)                         |                                         | 148 (51-324)         |                           | 9 (3-20)                     |                                   |
| 2001 | Senegal               | 2988 (2119-3114)          |                                | 176 (125-184)                     |                                        | 476 (169-1065)             |                                 | 28 (10-63)                         |                                         | 150 (53-335)         |                           | 9 (3-20)                     |                                   |
| 2002 | Senegal               | 2904 (2059-3026)          |                                | 167 (118-174)                     |                                        | 463 (169-1025)             |                                 | 27 (10-59)                         |                                         | 145 (53-322)         |                           | 8 (3-19)                     |                                   |
| 2003 | Senegal               | 2799 (1985-2917)          |                                | 157 (111-164)                     |                                        | 447 (169-978)              |                                 | 25 (9-55)                          |                                         | 140 (53-307)         |                           | 8 (3-17)                     |                                   |
| 2004 | Senegal               | 2681 (1901-2794)          |                                | 147 (104-153)                     |                                        | 429 (167-927)              |                                 | 23 (9-51)                          |                                         | 135 (53-291)         |                           | 7 (3-16)                     |                                   |
| 2005 | Senegal               | 2548 (1807-2655)          |                                | 136 (96-141)                      |                                        | 410 (165-874)              |                                 | 22 (9-47)                          |                                         | 129 (52-275)         |                           | 7 (3-15)                     |                                   |
| 2006 | Senegal               | 2418 (1715-2521)          |                                | 125 (89-130)                      |                                        | 390 (158-829)              |                                 | 20 (8-43)                          |                                         | 123 (50-261)         |                           | 6 (3-13)                     |                                   |
| 2007 | Senegal               | 2276 (1614-2372)          |                                | 114 (81-119)                      |                                        | 367 (149-778)              |                                 | 18 (8-39)                          |                                         | 116 (47-245)         |                           | 6 (2-12)                     |                                   |
| 2008 | Senegal               | 2139 (1517-2229)          |                                | 105 (74-109)                      |                                        | 344 (141-729)              |                                 | 17 (7-36)                          |                                         | 108 (44-229)         |                           | 5 (2-11)                     |                                   |
| 2009 | Senegal               | 2009 (1424-2093)          |                                | 96 (68-100)                       |                                        | 323 (112-704)              |                                 | 15 (5-34)                          |                                         | 287 (100-626)        |                           | 14 (5-30)                    |                                   |
| 2010 | Senegal               | 1898 (1346-1978)          |                                | 88 (62-92)                        |                                        | 305 (107-664)              |                                 | 14 (5-31)                          |                                         | 271 (95-591)         |                           | 13 (4-27)                    |                                   |
| 2011 | Senegal               | 1798 (1275-1874)          |                                | 81 (57-84)                        |                                        | 289 (101-630)              |                                 | 13 (5-28)                          |                                         | 257 (90-561)         |                           | 12 (4-25)                    |                                   |
| 2012 | Senegal               | 1726 (1224-1799)          |                                | 75 (53-78)                        |                                        | 277 (101-601)              |                                 | 12 (4-26)                          |                                         | 246 (90-535)         |                           | 11 (4-23)                    |                                   |
| 2013 | Senegal               | 1684 (1194-1755)          |                                | 69 (48-73)                        |                                        | 269 (89-586)               |                                 | 11 (4-24)                          |                                         | 240 (87-521)         |                           | 10 (4-22)                    |                                   |
| 2014 | Senegal               | 1144 (811-1192)           |                                | 46 (33-48)                        |                                        | 172 (55-383)               |                                 | 7 (2-15)                           |                                         | 153 (49-341)         |                           | 6 (2-14)                     |                                   |
| 2015 | Senegal               | 909 (645-947)             | 12 (9-13)                      | 36 (25-37)                        | 0 (0-1)                                | 134 (44-300)               | 2 (1-4)                         | 5 (2-12)                           | 0 (0-0)                                 | 120 (39-267)         | 2 (1-4)                   | 5 (2-10)                     | 0 (0-0)                           |
| 2000 | Serbia                | 25 (18-26)                |                                | 4 (3-4)                           |                                        | 5 (2-11)                   |                                 | 1 (0-2)                            |                                         | 4 (2-10)             |                           | 1 (0-2)                      |                                   |
| 2001 | Serbia                | 17 (12-18)                |                                | 3 (2-3)                           |                                        | 4 (2-9)                    |                                 | 1 (0-2)                            |                                         | 4 (2-8)              |                           | 1 (0-1)                      |                                   |
| 2002 | Serbia                | 14 (10-14)                |                                | 2 (2-2)                           |                                        | 2 (1-5)                    |                                 | 0 (0-1)                            |                                         | 2 (1-5)              |                           | 0 (0-1)                      |                                   |
| 2003 | Serbia                | 20 (14-21)                |                                | 4 (3-4)                           |                                        | 3 (2-8)                    |                                 | 1 (0-1)                            |                                         | 3 (1-8)              |                           | 1 (0-1)                      |                                   |
| 2004 | Serbia                | 19 (13-20)                |                                | 3 (2-4)                           |                                        | 3 (1-7)                    |                                 | 1 (0-1)                            |                                         | 2 (1-6)              |                           | 0 (0-1)                      |                                   |
| 2005 | Serbia                | 14 (10-15)                |                                | 3 (2-3)                           |                                        | 4 (2-10)                   |                                 | 1 (0-2)                            |                                         | 3 (2-9)              |                           | 1 (0-2)                      |                                   |
| 2006 | Serbia                | 9 (7-10)                  |                                | 2 (1-2)                           |                                        | 2 (1-6)                    |                                 | 0 (0-1)                            |                                         | 2 (1-5)              |                           | 0 (0-1)                      |                                   |
| 2007 | Serbia                | 17 (12-17)                |                                | 3 (2-4)                           |                                        | 3 (1-9)                    |                                 | 0 (0-1)                            |                                         | 3 (1-8)              |                           | 1 (0-2)                      |                                   |
| 2008 | Serbia                | 15 (11-16)                |                                | 3 (2-3)                           |                                        | 1 (0-3)                    |                                 | 0 (0-1)                            |                                         | 1 (0-2)              |                           | 0 (0-0)                      |                                   |
| 2009 | Serbia                | 13 (9-14)                 |                                | 3 (2-3)                           |                                        | 2 (1-7)                    |                                 | 1 (0-2)                            |                                         | 2 (1-6)              |                           | 0 (0-1)                      |                                   |
| 2010 | Serbia                | 10 (7-11)                 |                                | 2 (2-2)                           |                                        | 1 (0-2)                    |                                 | 0 (0-0)                            |                                         | 1 (0-2)              |                           | 0 (0-0)                      |                                   |
| 2011 | Serbia                | 12 (9-13)                 |                                | 3 (2-3)                           |                                        | 2 (1-6)                    |                                 | 0 (0-1)                            |                                         | 2 (1-5)              |                           | 0 (0-1)                      |                                   |
| 2012 | Serbia                | 10 (7-11)                 |                                | 2 (2-2)                           |                                        | 0 (0-1)                    |                                 | 0 (0-0)                            |                                         | 0 (0-1)              |                           | 0 (0-0)                      |                                   |
| 2013 | Serbia                | 7 (5-7)                   |                                | 2 (1-2)                           |                                        | 1 (0-3)                    |                                 | 0 (0-1)                            |                                         | 1 (0-3)              |                           | 0 (0-1)                      |                                   |
| 2014 | Serbia                | 10 (7-10)                 |                                | 2 (2-2)                           |                                        | 1 (0-3)                    |                                 | 0 (0-1)                            |                                         | 1 (0-3)              |                           | 0 (0-1)                      |                                   |
| 2015 | Serbia                | 10 (7-10)                 | 0 (0-0)                        | 2 (2-2)                           | 0 (0-0)                                | 1 (0-3)                    | 0 (0-0)                         | 0 (0-1)                            | 0 (0-0)                                 | 1 (0-3)              | 0 (0-0)                   | 0 (0-1)                      | 0 (0-0)                           |
| 2000 | Seychelles            | 0 (0-0)                   |                                | 5 (4-5)                           |                                        | 0 (0-0)                    |                                 | 1 (1-2)                            |                                         | 0 (0-0)              |                           | 1 (1-2)                      |                                   |
| 2001 | Seychelles            | 0 (0-0)                   |                                | 6 (4-6)                           |                                        | 0 (0-0)                    |                                 | 1 (1-2)                            |                                         | 0 (0-0)              |                           | 1 (1-2)                      |                                   |
| 2002 | Seychelles            | 0 (0-0)                   |                                | 6 (4-6)                           |                                        | 0 (0-0)                    |                                 | 1 (1-2)                            |                                         | 0 (0-0)              |                           | 1 (1-2)                      |                                   |
| 2003 | Seychelles            | 0 (0-0)                   |                                | 5 (4-5)                           |                                        | 0 (0-0)                    |                                 | 1 (1-2)                            |                                         | 0 (0-0)              |                           | 1 (1-2)                      |                                   |
| 2004 | Seychelles            | 0 (0-0)                   |                                | 5 (4-5)                           |                                        | 0 (0-0)                    |                                 | 1 (1-2)                            |                                         | 0 (0-0)              |                           | 1 (1-2)                      |                                   |
| 2005 | Seychelles            | 0 (0-0)                   |                                | 5 (4-6)                           |                                        | 0 (0-0)                    |                                 | 1 (1-2)                            |                                         | 0 (0-0)              |                           | 1 (1-2)                      |                                   |
| 2006 | Seychelles            | 0 (0-0)                   |                                | 5 (4-5)                           |                                        | 0 (0-0)                    |                                 | 1 (1-2)                            |                                         | 0 (0-0)              |                           | 1 (1-2)                      |                                   |
| 2007 | Seychelles            | 0 (0-0)                   |                                | 5 (4-5)                           |                                        | 0 (0-0)                    |                                 | 1 (1-2)                            |                                         | 0 (0-0)              |                           | 1 (1-1)                      |                                   |
| 2008 | Seychelles            | 0 (0-0)                   |                                | 5 (4-5)                           |                                        | 0 (0-0)                    |                                 | 1 (1-2)                            |                                         | 0 (0-0)              |                           | 1 (1-1)                      |                                   |
| 2009 | Seychelles            | 0 (0-0)                   |                                | 5 (4-5)                           |                                        | 0 (0-0)                    |                                 | 1 (1-2)                            |                                         | 0 (0-0)              |                           | 1 (1-1)                      |                                   |
| 2010 | Seychelles            | 0 (0-0)                   |                                | 5 (4-6)                           |                                        | 0 (0-0)                    |                                 | 2 (1-2)                            |                                         | 0 (0-0)              |                           | 2 (1-2)                      |                                   |
| 2011 | Seychelles            | 0 (0-0)                   |                                | 6 (4-6)                           |                                        | 0 (0-0)                    |                                 | 2 (1-3)                            |                                         | 0 (0-0)              |                           | 2 (1-2)                      |                                   |
| 2012 | Seychelles            | 0 (0-0)                   |                                | 5 (4-5)                           |                                        | 0 (0-0)                    |                                 | 2 (1-2)                            |                                         | 0 (0-0)              |                           | 1 (1-2)                      |                                   |
| 2013 | Seychelles            | 0 (0-0)                   |                                | 6 (4-6)                           |                                        | 0 (0-0)                    |                                 | 2 (1-2)                            |                                         | 0 (0-0)              |                           | 2 (1-2)                      |                                   |
| 2014 | Seychelles            | 0 (0-0)                   |                                | 6 (4-6)                           |                                        | 0 (0-0)                    |                                 | 2 (1-2)                            |                                         | 0 (0-0)              |                           | 2 (1-2)                      |                                   |
| 2015 | Seychelles            | 0 (0-0)                   | 0 (0-0)                        | 6 (4-6)                           | 0 (0-0)                                | 0 (0-0)                    | 0 (0-0)                         | 2 (1-2)                            | 0 (0-0)                                 | 0 (0-0)              | 0 (0-0)                   | 2 (1-2)                      | 0 (0-0)                           |
| 2000 | Sierra Leone          | 1807 (1281-1883)          |                                | 259 (184-270)                     |                                        | 373 (211-668)              |                                 | 54 (30-96)                         |                                         | 117 (66-210)         |                           | 17 (10-30)                   |                                   |
| 2001 | Sierra Leone          | 1841 (1305-1919)          |                                | 253 (179-264)                     |                                        | 379 (214-680)              |                                 | 52 (29-93)                         |                                         | 119 (67-214)         |                           | 16 (9-29)                    |                                   |
| 2002 | Sierra Leone          | 1895 (1344-1975)          |                                | 249 (176-259)                     |                                        | 386 (218-694)              |                                 | 51 (29-91)                         |                                         | 121 (68-218)         |                           | 16 (9-29)                    |                                   |
| 2003 | Sierra Leone          | 1962 (1391-2045)          |                                | 246 (174-256)                     |                                        | 397 (227-714)              |                                 | 50 (28-90)                         |                                         | 125 (70-224)         |                           | 16 (9-28)                    |                                   |
| 2004 | Sierra Leone          | 2036 (1444-2122)          |                                | 245 (173-255)                     |                                        | 407 (229-734)              |                                 | 49 (27-88)                         |                                         | 128 (72-231)         |                           | 15 (8-28)                    |                                   |
| 2005 | Sierra Leone          | 2080 (1475-2167)          |                                | 242 (171-252)                     |                                        | 409 (230-740)              |                                 | 48 (27-86)                         |                                         | 129 (72-233)         |                           | 15 (8-27)                    |                                   |
| 2006 | Sierra Leone          | 2108 (1495-2197)          |                                | 237 (168-247)                     |                                        | 409 (228-739)              |                                 | 46 (26-83)                         |                                         | 129 (72-232)         |                           | 14 (8-26)                    |                                   |
| 2007 | Sierra Leone          | 2061 (1462-2148)          |                                | 226 (160-236)                     |                                        | 397 (219-713)              |                                 | 44 (24-78)                         |                                         | 125 (69-224)         |                           | 14 (8-25)                    |                                   |
| 2008 | Sierra Leone          | 1960 (1390-2043)          |                                | 211 (150-220)                     |                                        | 378 (206-673)              |                                 | 41 (22-73)                         |                                         | 119 (65-212)         |                           | 13 (7-23)                    |                                   |
| 2009 | Sierra Leone          | 1839 (1304-1917)          |                                | 196 (139-204)                     |                                        | 359 (212-617)              |                                 | 38 (23-66)                         |                                         | 113 (67-194)         |                           | 12 (7-21)                    |                                   |
| 2010 | Sierra Leone          | 1725 (1223-1798)          |                                | 182 (129-189)                     |                                        | 340 (220-565)              |                                 | 36 (23-60)                         |                                         | 107 (69-178)         |                           | 11 (6-19)                    |                                   |
| 2011 | Sierra Leone          | 1201 (851-1251)           |                                | 125 (88-130)                      |                                        | 224 (143-370)              |                                 | 23 (15-38)                         |                                         | 70 (45-116)          |                           | 7 (5-12)                     |                                   |
| 2012 | Sierra Leone          | 937 (664-977)             |                                | 96 (68-100)                       |                                        | 169 (83-310)               |                                 | 17 (9-32)                          |                                         | 53 (26-97)           |                           | 5 (3-10)                     |                                   |
| 2013 | Sierra Leone          | 807 (573-842)             |                                | 83 (59-86)                        |                                        | 148 (73-274)               |                                 | 15 (7-28)                          |                                         | 47 (23-86)           |                           | 5 (2-9)                      |                                   |
| 2014 | Sierra Leone          | 796 (565-830)             |                                | 81 (58-85)                        |                                        | 147 (72-274)               |                                 | 15 (7-28)                          |                                         | 46 (23-86)           |                           | 5 (2-9)                      |                                   |

Spn = *Streptococcus pneumoniae*; npnm = non-pneumonia, non-meningitis; HIV = deaths only in HIV-infected children; Uncertainty range provided in parentheses.



| Year | Country         | Spn pneumonia deaths<br>(UR) | Spn pneumonia deaths,<br>HIV (UR) | Spn pneumonia<br>mortality rate (UR) | Spn pneumonia<br>mortality rate, HIV (UR) | Spn meningitis deaths<br>(UR) | Spn meningitis deaths,<br>HIV (UR) | Spn meningitis<br>mortality rate (UR) | Spn meningitis<br>mortality rate, HIV (UR) | Spn NPNM deaths (UR) | Spn NPNM deaths, HIV<br>(UR) | Spn NPNM mortality<br>rate (UR) | Spn NPNM mortality<br>rate, HIV (UR) |           |         |
|------|-----------------|------------------------------|-----------------------------------|--------------------------------------|-------------------------------------------|-------------------------------|------------------------------------|---------------------------------------|--------------------------------------------|----------------------|------------------------------|---------------------------------|--------------------------------------|-----------|---------|
| 2015 | Sierra Leone    | 554 (393-578)                |                                   | 22 (16-23)                           | 56 (40-59)                                | 2 (2-2)                       |                                    | 97 (47-182)                           | 4 (2-7)                                    | 10 (5-18)            | 0 (0-1)                      | 30 (15-57)                      | 1 (1-2)                              | 3 (2-6)   | 0 (0-0) |
| 2000 | Singapore       | 5 (4-5)                      |                                   | 2 (1-2)                              | 2 (1-2)                                   |                               |                                    | 3 (2-4)                               | 1 (1-2)                                    |                      |                              | 3 (2-4)                         | 1 (1-1)                              | 1 (1-1)   |         |
| 2001 | Singapore       | 6 (4-7)                      |                                   | 3 (2-3)                              | 3 (2-3)                                   |                               |                                    | 1 (1-2)                               | 0 (0-1)                                    |                      |                              | 1 (1-1)                         | 0 (0-1)                              | 0 (0-1)   |         |
| 2002 | Singapore       | 6 (5-7)                      |                                   | 3 (2-3)                              | 3 (2-3)                                   |                               |                                    | 2 (1-2)                               | 1 (0-1)                                    |                      |                              | 2 (1-2)                         | 1 (0-1)                              | 1 (0-1)   |         |
| 2003 | Singapore       | 9 (6-10)                     |                                   | 4 (3-4)                              | 4 (3-4)                                   |                               |                                    | 0 (0-0)                               | 0 (0-0)                                    |                      |                              | 0 (0-0)                         | 0 (0-0)                              | 0 (0-0)   |         |
| 2004 | Singapore       | 7 (5-8)                      |                                   | 3 (2-3)                              | 3 (2-3)                                   |                               |                                    | 1 (0-1)                               | 0 (0-0)                                    |                      |                              | 1 (0-1)                         | 1 (0-1)                              | 0 (0-0)   |         |
| 2005 | Singapore       | 8 (6-8)                      |                                   | 3 (2-3)                              | 3 (2-3)                                   |                               |                                    | 1 (0-1)                               | 0 (0-0)                                    |                      |                              | 1 (0-1)                         | 1 (0-1)                              | 0 (0-0)   |         |
| 2006 | Singapore       | 8 (5-8)                      |                                   | 3 (2-3)                              | 3 (2-3)                                   |                               |                                    | 0 (0-0)                               | 0 (0-0)                                    |                      |                              | 0 (0-0)                         | 0 (0-0)                              | 0 (0-0)   |         |
| 2007 | Singapore       | 9 (7-10)                     |                                   | 4 (3-4)                              | 4 (3-4)                                   |                               |                                    | 1 (0-1)                               | 0 (0-0)                                    |                      |                              | 1 (0-1)                         | 1 (0-1)                              | 0 (0-0)   |         |
| 2008 | Singapore       | 5 (4-5)                      |                                   | 2 (1-2)                              | 2 (1-2)                                   |                               |                                    | 1 (0-1)                               | 0 (0-0)                                    |                      |                              | 1 (0-1)                         | 1 (0-1)                              | 0 (0-0)   |         |
| 2009 | Singapore       | 6 (4-6)                      |                                   | 2 (2-2)                              | 2 (2-2)                                   |                               |                                    | 1 (1-2)                               | 1 (0-1)                                    |                      |                              | 1 (1-2)                         | 1 (0-1)                              | 0 (0-1)   |         |
| 2010 | Singapore       | 4 (3-4)                      |                                   | 1 (1-1)                              | 1 (1-1)                                   |                               |                                    | 0 (0-0)                               | 0 (0-0)                                    |                      |                              | 0 (0-0)                         | 0 (0-0)                              | 0 (0-0)   |         |
| 2011 | Singapore       | 5 (3-5)                      |                                   | 2 (1-2)                              | 2 (1-2)                                   |                               |                                    | 1 (1-1)                               | 0 (0-1)                                    |                      |                              | 1 (1-1)                         | 1 (1-1)                              | 0 (0-1)   |         |
| 2012 | Singapore       | 8 (6-8)                      |                                   | 3 (2-3)                              | 3 (2-3)                                   |                               |                                    | 0 (0-0)                               | 0 (0-0)                                    |                      |                              | 0 (0-0)                         | 0 (0-0)                              | 0 (0-0)   |         |
| 2013 | Singapore       | 5 (4-5)                      |                                   | 2 (1-2)                              | 2 (1-2)                                   |                               |                                    | 0 (0-0)                               | 0 (0-0)                                    |                      |                              | 0 (0-0)                         | 0 (0-0)                              | 0 (0-0)   |         |
| 2014 | Singapore       | 5 (4-6)                      |                                   | 2 (1-2)                              | 2 (1-2)                                   |                               |                                    | 0 (0-0)                               | 0 (0-0)                                    |                      |                              | 0 (0-0)                         | 0 (0-0)                              | 0 (0-0)   |         |
| 2015 | Singapore       | 5 (4-5)                      |                                   | 0 (0-0)                              | 2 (1-2)                                   | 0 (0-0)                       |                                    | 0 (0-0)                               | 0 (0-0)                                    | 0 (0-0)              |                              | 0 (0-0)                         | 0 (0-0)                              | 0 (0-0)   | 0 (0-0) |
| 2000 | Slovakia        | 22 (16-23)                   |                                   | 8 (6-8)                              | 8 (6-8)                                   |                               |                                    | 3 (1-6)                               | 1 (1-2)                                    |                      |                              | 3 (1-5)                         | 1 (1-2)                              | 1 (0-2)   |         |
| 2001 | Slovakia        | 19 (13-20)                   |                                   | 7 (5-7)                              | 7 (5-7)                                   |                               |                                    | 5 (2-9)                               | 2 (1-4)                                    |                      |                              | 5 (2-8)                         | 2 (1-3)                              | 2 (1-3)   |         |
| 2002 | Slovakia        | 19 (13-20)                   |                                   | 7 (5-8)                              | 7 (5-8)                                   |                               |                                    | 2 (1-4)                               | 1 (0-1)                                    |                      |                              | 2 (1-3)                         | 1 (0-1)                              | 1 (0-1)   |         |
| 2003 | Slovakia        | 17 (12-17)                   |                                   | 7 (5-7)                              | 7 (5-7)                                   |                               |                                    | 3 (1-6)                               | 1 (1-2)                                    |                      |                              | 3 (1-5)                         | 1 (1-2)                              | 1 (1-2)   |         |
| 2004 | Slovakia        | 18 (13-18)                   |                                   | 7 (5-7)                              | 7 (5-7)                                   |                               |                                    | 2 (1-3)                               | 1 (0-1)                                    |                      |                              | 2 (1-3)                         | 1 (0-1)                              | 1 (0-1)   |         |
| 2005 | Slovakia        | 19 (14-20)                   |                                   | 8 (5-8)                              | 8 (5-8)                                   |                               |                                    | 2 (1-4)                               | 1 (0-2)                                    |                      |                              | 2 (1-4)                         | 1 (0-1)                              | 1 (0-1)   |         |
| 2006 | Slovakia        | 16 (11-16)                   |                                   | 6 (4-6)                              | 6 (4-6)                                   |                               |                                    | 2 (1-4)                               | 1 (0-1)                                    |                      |                              | 2 (1-3)                         | 1 (0-1)                              | 1 (0-1)   |         |
| 2007 | Slovakia        | 21 (15-21)                   |                                   | 8 (6-8)                              | 8 (6-8)                                   |                               |                                    | 1 (1-2)                               | 0 (0-1)                                    |                      |                              | 1 (1-2)                         | 0 (0-1)                              | 0 (0-1)   |         |
| 2008 | Slovakia        | 21 (15-22)                   |                                   | 8 (6-8)                              | 8 (6-8)                                   |                               |                                    | 3 (2-7)                               | 1 (1-3)                                    |                      |                              | 3 (2-6)                         | 1 (1-2)                              | 1 (1-2)   |         |
| 2009 | Slovakia        | 11 (8-12)                    |                                   | 4 (3-4)                              | 4 (3-4)                                   |                               |                                    | 2 (1-3)                               | 1 (0-1)                                    |                      |                              | 2 (1-3)                         | 1 (0-1)                              | 1 (0-1)   |         |
| 2010 | Slovakia        | 8 (5-8)                      |                                   | 3 (2-3)                              | 3 (2-3)                                   |                               |                                    | 1 (0-2)                               | 0 (0-1)                                    |                      |                              | 1 (0-2)                         | 0 (0-1)                              | 0 (0-1)   |         |
| 2011 | Slovakia        | 7 (5-7)                      |                                   | 2 (2-2)                              | 2 (2-2)                                   |                               |                                    | 1 (0-2)                               | 0 (0-1)                                    |                      |                              | 1 (0-1)                         | 0 (0-1)                              | 0 (0-0)   |         |
| 2012 | Slovakia        | 6 (4-6)                      |                                   | 2 (1-2)                              | 2 (1-2)                                   |                               |                                    | 1 (0-2)                               | 0 (0-1)                                    |                      |                              | 1 (0-2)                         | 0 (0-1)                              | 0 (0-1)   |         |
| 2013 | Slovakia        | 6 (4-6)                      |                                   | 2 (1-2)                              | 2 (1-2)                                   |                               |                                    | 0 (0-0)                               | 0 (0-0)                                    |                      |                              | 0 (0-0)                         | 0 (0-0)                              | 0 (0-0)   |         |
| 2014 | Slovakia        | 5 (4-5)                      |                                   | 2 (1-2)                              | 2 (1-2)                                   |                               |                                    | 1 (0-1)                               | 0 (0-0)                                    |                      |                              | 1 (0-1)                         | 0 (0-1)                              | 0 (0-0)   |         |
| 2015 | Slovakia        | 6 (4-6)                      | 0 (0-0)                           | 2 (1-2)                              | 2 (1-2)                                   | 0 (0-0)                       |                                    | 1 (0-1)                               | 0 (0-0)                                    | 0 (0-0)              |                              | 1 (0-1)                         | 0 (0-0)                              | 0 (0-0)   | 0 (0-0) |
| 2000 | Slovenia        | 0 (0-0)                      |                                   | 0 (0-0)                              | 0 (0-0)                                   |                               |                                    | 0 (0-0)                               | 0 (0-0)                                    | 0 (0-0)              |                              | 0 (0-0)                         | 0 (0-0)                              | 0 (0-0)   | 0 (0-0) |
| 2001 | Slovenia        | 1 (0-1)                      |                                   | 1 (0-1)                              | 1 (0-1)                                   |                               |                                    | 0 (0-0)                               | 0 (0-0)                                    | 0 (0-0)              |                              | 0 (0-0)                         | 0 (0-0)                              | 0 (0-0)   |         |
| 2002 | Slovenia        | 1 (1-1)                      |                                   | 1 (1-1)                              | 1 (1-1)                                   |                               |                                    | 1 (0-2)                               | 1 (0-2)                                    | 0 (0-0)              |                              | 1 (0-2)                         | 1 (0-2)                              | 1 (0-2)   |         |
| 2003 | Slovenia        | 2 (1-2)                      |                                   | 2 (1-2)                              | 2 (1-2)                                   |                               |                                    | 0 (0-0)                               | 0 (0-0)                                    | 0 (0-0)              |                              | 0 (0-0)                         | 0 (0-0)                              | 0 (0-0)   |         |
| 2004 | Slovenia        | 0 (0-1)                      |                                   | 1 (0-1)                              | 1 (0-1)                                   |                               |                                    | 0 (0-0)                               | 0 (0-0)                                    | 0 (0-0)              |                              | 0 (0-0)                         | 0 (0-0)                              | 0 (0-0)   |         |
| 2005 | Slovenia        | 0 (0-0)                      |                                   | 0 (0-0)                              | 0 (0-0)                                   |                               |                                    | 0 (0-1)                               | 0 (0-1)                                    | 0 (0-0)              |                              | 0 (0-1)                         | 0 (0-1)                              | 0 (0-1)   |         |
| 2006 | Slovenia        | 0 (0-0)                      |                                   | 0 (0-0)                              | 0 (0-0)                                   |                               |                                    | 0 (0-0)                               | 0 (0-0)                                    | 0 (0-0)              |                              | 0 (0-0)                         | 0 (0-0)                              | 0 (0-0)   |         |
| 2007 | Slovenia        | 1 (1-1)                      |                                   | 1 (1-1)                              | 1 (1-1)                                   |                               |                                    | 0 (0-0)                               | 0 (0-0)                                    | 0 (0-0)              |                              | 0 (0-0)                         | 0 (0-0)                              | 0 (0-0)   |         |
| 2008 | Slovenia        | 0 (0-0)                      |                                   | 0 (0-0)                              | 0 (0-0)                                   |                               |                                    | 0 (0-0)                               | 0 (0-0)                                    | 0 (0-0)              |                              | 0 (0-0)                         | 0 (0-0)                              | 0 (0-0)   |         |
| 2009 | Slovenia        | 1 (1-1)                      |                                   | 1 (1-1)                              | 1 (1-1)                                   |                               |                                    | 0 (0-0)                               | 0 (0-0)                                    | 0 (0-0)              |                              | 0 (0-0)                         | 0 (0-0)                              | 0 (0-0)   |         |
| 2010 | Slovenia        | 1 (1-1)                      |                                   | 1 (1-1)                              | 1 (1-1)                                   |                               |                                    | 0 (0-0)                               | 0 (0-0)                                    | 0 (0-0)              |                              | 0 (0-0)                         | 0 (0-0)                              | 0 (0-0)   |         |
| 2011 | Slovenia        | 1 (0-1)                      |                                   | 1 (0-1)                              | 1 (0-1)                                   |                               |                                    | 0 (0-0)                               | 0 (0-0)                                    | 0 (0-0)              |                              | 0 (0-0)                         | 0 (0-0)                              | 0 (0-0)   |         |
| 2012 | Slovenia        | 1 (0-1)                      |                                   | 1 (0-1)                              | 1 (0-1)                                   |                               |                                    | 0 (0-0)                               | 0 (0-0)                                    | 0 (0-0)              |                              | 0 (0-0)                         | 0 (0-0)                              | 0 (0-0)   |         |
| 2013 | Slovenia        | 1 (0-1)                      |                                   | 0 (0-0)                              | 0 (0-0)                                   |                               |                                    | 0 (0-0)                               | 0 (0-0)                                    | 0 (0-0)              |                              | 0 (0-0)                         | 0 (0-0)                              | 0 (0-0)   |         |
| 2014 | Slovenia        | 0 (0-0)                      |                                   | 0 (0-0)                              | 0 (0-0)                                   |                               |                                    | 0 (0-0)                               | 0 (0-0)                                    | 0 (0-0)              |                              | 0 (0-0)                         | 0 (0-0)                              | 0 (0-0)   |         |
| 2015 | Slovenia        | 0 (0-0)                      | 0 (0-0)                           | 0 (0-0)                              | 0 (0-0)                                   | 0 (0-0)                       |                                    | 0 (0-0)                               | 0 (0-0)                                    | 0 (0-0)              | 0 (0-0)                      | 0 (0-0)                         | 0 (0-0)                              | 0 (0-0)   | 0 (0-0) |
| 2000 | Solomon Islands | 22 (16-23)                   |                                   | 35 (25-37)                           | 35 (25-37)                                |                               |                                    | 2 (1-6)                               | 3 (1-9)                                    |                      |                              | 2 (1-5)                         | 3 (1-8)                              | 3 (1-8)   |         |
| 2001 | Solomon Islands | 23 (16-24)                   |                                   | 35 (25-37)                           | 35 (25-37)                                |                               |                                    | 2 (1-6)                               | 3 (1-9)                                    |                      |                              | 2 (1-5)                         | 3 (1-8)                              | 3 (1-8)   |         |
| 2002 | Solomon Islands | 24 (17-25)                   |                                   | 36 (25-37)                           | 36 (25-37)                                |                               |                                    | 2 (1-6)                               | 3 (1-9)                                    |                      |                              | 2 (1-5)                         | 3 (1-8)                              | 3 (1-8)   |         |
| 2003 | Solomon Islands | 24 (17-25)                   |                                   | 36 (25-37)                           | 36 (25-37)                                |                               |                                    | 2 (1-6)                               | 3 (1-9)                                    |                      |                              | 2 (1-6)                         | 3 (1-8)                              | 3 (1-8)   |         |
| 2004 | Solomon Islands | 25 (18-26)                   |                                   | 36 (26-38)                           | 36 (26-38)                                |                               |                                    | 2 (1-6)                               | 3 (1-9)                                    |                      |                              | 2 (1-6)                         | 3 (1-8)                              | 3 (1-8)   |         |
| 2005 | Solomon Islands | 26 (18-27)                   |                                   | 36 (26-38)                           | 36 (26-38)                                |                               |                                    | 2 (1-7)                               | 3 (1-9)                                    |                      |                              | 2 (1-6)                         | 3 (1-8)                              | 3 (1-8)   |         |
| 2006 | Solomon Islands | 27 (19-28)                   |                                   | 37 (26-38)                           | 37 (26-38)                                |                               |                                    | 2 (1-7)                               | 3 (1-9)                                    |                      |                              | 2 (1-6)                         | 3 (1-8)                              | 3 (1-8)   |         |
| 2007 | Solomon Islands | 27 (19-28)                   |                                   | 36 (26-38)                           | 36 (26-38)                                |                               |                                    | 2 (1-7)                               | 3 (1-9)                                    |                      |                              | 2 (1-6)                         | 3 (1-8)                              | 3 (1-8)   |         |
| 2008 | Solomon Islands | 27 (19-28)                   |                                   | 36 (25-37)                           | 36 (25-37)                                |                               |                                    | 2 (1-7)                               | 3 (1-9)                                    |                      |                              | 2 (1-6)                         | 3 (1-8)                              | 3 (1-8)   |         |
| 2009 | Solomon Islands | 27 (19-28)                   |                                   | 35 (25-37)                           | 35 (25-37)                                |                               |                                    | 2 (1-7)                               | 3 (1-9)                                    |                      |                              | 2 (1-6)                         | 3 (1-8)                              | 3 (1-8)   |         |
| 2010 | Solomon Islands | 27 (19-28)                   |                                   | 35 (25-36)                           | 35 (25-36)                                |                               |                                    | 2 (1-7)                               | 3 (1-8)                                    |                      |                              | 2 (1-6)                         | 3 (1-8)                              | 3 (1-8)   |         |
| 2011 | Solomon Islands | 27 (19-28)                   |                                   | 34 (24-35)                           | 34 (24-35)                                |                               |                                    | 2 (1-7)                               | 3 (1-8)                                    |                      |                              | 2 (1-6)                         | 3 (1-7)                              | 3 (1-7)   |         |
| 2012 | Solomon Islands | 26 (19-27)                   |                                   | 33 (23-34)                           | 33 (23-34)                                |                               |                                    | 2 (1-6)                               | 3 (1-8)                                    |                      |                              | 2 (1-6)                         | 2 (1-7)                              | 2 (1-7)   |         |
| 2013 | Solomon Islands | 26 (18-27)                   |                                   | 32 (23-33)                           | 32 (23-33)                                |                               |                                    | 2 (1-8)                               | 3 (1-11)                                   |                      |                              | 2 (0-8)                         | 2 (1-10)                             | 2 (1-10)  |         |
| 2014 | Solomon Islands | 25 (17-26)                   |                                   | 31 (22-32)                           | 31 (22-32)                                |                               |                                    | 2 (1-9)                               | 3 (1-11)                                   |                      |                              | 2 (0-8)                         | 2 (0-8)                              | 2 (0-8)   |         |
| 2015 | Solomon Islands | 18 (12-18)                   | 0 (0-0)                           | 22 (15-23)                           | 22 (15-23)                                | 0 (0-0)                       |                                    | 2 (0-7)                               | 2 (1-8)                                    | 0 (0-0)              |                              | 1 (0-6)                         | 0 (0-0)                              | 2 (0-7)   | 0 (0-0) |
| 2000 | Somalia         | 3620 (2567-3772)             |                                   | 251 (178-261)                        | 251 (178-261)                             |                               |                                    | 749 (367-1520)                        | 52 (25-105)                                |                      |                              | 236 (116-478)                   | 16 (8-33)                            | 16 (8-33) |         |
| 2001 | Somalia         | 3687 (2615-3843)             |                                   | 246 (175-255)                        | 246 (175-255)                             |                               |                                    | 764 (375-1550)                        | 51 (25-103)                                |                      |                              | 240 (118-487)                   | 16 (8-33)                            | 16 (8-33) |         |
| 2002 | Somalia         | 3838 (2722-4000)             |                                   | 250 (178-261)                        | 250 (178-261)                             |                               |                                    | 795 (390-1614)                        | 52 (25-105)                                |                      |                              | 250 (123-507)                   | 16 (8-33)                            | 16 (8-33) |         |
| 2003 | Somalia         | 4111 (2915-4284)             |                                   | 264 (188-276)                        | 264 (188-276)                             |                               |                                    | 852 (418-1729)                        | 55 (27-111)                                |                      |                              | 268 (131-543)                   | 17 (8-35)                            | 17 (8-35) |         |
| 2004 | Somalia         | 4235 (3003-4414)             |                                   | 269 (191-280)                        | 269 (191-280)                             |                               |                                    | 877 (430-1780)                        | 56 (27-113)                                |                      |                              | 276 (135-559)                   | 18 (8-36)                            | 18 (8-36) |         |
| 2005 | Somalia         | 4394 (3116-4579)             |                                   | 274 (195-286)                        | 274 (195-286)                             |                               |                                    | 908 (445-1843)                        | 57 (28-115)                                |                      |                              | 286 (140-573)                   | 18 (8-36)                            | 18 (8-36) |         |
| 2006 | Somalia         | 4554 (3229-4745)             |                                   | 280 (198-292)                        | 280 (198-292)                             |                               |                                    | 940 (461-1906)                        | 58 (28-117)                                |                      |                              | 295 (145-599)                   | 18 (8-37)                            | 18 (8-37) |         |
| 2007 | Somalia         | 4716 (3344-4915)             |                                   | 284 (201-295)                        | 284 (201-295)                             |                               |                                    | 972 (477-1971)                        | 58 (29-119)                                |                      |                              | 306 (150-620)                   | 18 (8-37)                            | 18 (8-37) |         |
| 2008 | Somalia         | 4833 (3427-5037)             |                                   | 283 (201-295)                        | 283 (201-295)                             |                               |                                    | 996 (489-2018)                        | 58 (29-118)                                |                      |                              | 313 (154-635)                   | 18 (8-37)                            | 18 (8-37) |         |
| 2009 | Somalia         | 4906 (3479-5113)             |                                   | 281 (199-292)                        | 281 (199-292)                             |                               |                                    | 1011 (497-2049)                       | 58 (28-117)                                |                      |                              | 318 (156-644)                   | 18 (8-37)                            | 18 (8-37) |         |
| 2010 | Somalia         | 4926 (3494-5135)             |                                   | 276 (196-288)                        | 276 (196-288)                             |                               |                                    | 1005 (500-2057)                       | 57 (28-115)                                |                      |                              | 319 (157-647)                   | 18 (8-36)                            | 18 (8-36) |         |
| 2011 | Somalia         | 4885 (3464-5091)             |                                   | 267 (189-278)                        | 267 (189-278)                             |                               |                                    | 1005 (496-2036)                       | 55 (27-111)                                |                      |                              | 316 (156-640)                   | 17 (8-35)                            | 17 (8-35) |         |
| 2012 | Somalia         | 4788 (3396-4991)             |                                   | 258 (183-268)                        | 258 (183-268)                             |                               |                                    | 982 (486-1991)                        | 53 (26-107)                                |                      |                              | 309 (153-626)                   |                                      |           |         |

| Year | Country      | Spn pneumonia deaths (UR) | Spn pneumonia deaths, HIV (UR) | Spn pneumonia mortality rate (UR) | Spn pneumonia mortality rate, HIV (UR) | Spn meningitis deaths (UR) | Spn meningitis deaths, HIV (UR) | Spn meningitis mortality rate (UR) | Spn meningitis mortality rate, HIV (UR) | Spn NPNM deaths (UR) | Spn NPNM deaths, HIV (UR) | Spn NPNM mortality rate (UR) | Spn NPNM mortality rate, HIV (UR) |
|------|--------------|---------------------------|--------------------------------|-----------------------------------|----------------------------------------|----------------------------|---------------------------------|------------------------------------|-----------------------------------------|----------------------|---------------------------|------------------------------|-----------------------------------|
| 2007 | South Africa | 3518 (2495-3866)          |                                | 68 (48-71)                        |                                        | 358 (150-720)              |                                 | 7 (3-14)                           |                                         | 319 (134-641)        |                           | 6 (3-12)                     |                                   |
| 2008 | South Africa | 3696 (2621-3852)          |                                | 70 (50-73)                        |                                        | 375 (159-753)              |                                 | 7 (3-14)                           |                                         | 334 (141-670)        |                           | 6 (3-13)                     |                                   |
| 2009 | South Africa | 3751 (2660-3910)          |                                | 69 (49-72)                        |                                        | 381 (163-760)              |                                 | 7 (3-14)                           |                                         | 339 (146-677)        |                           | 6 (3-12)                     |                                   |
| 2010 | South Africa | 3392 (2405-3535)          |                                | 62 (44-64)                        |                                        | 342 (151-674)              |                                 | 6 (3-12)                           |                                         | 304 (135-600)        |                           | 6 (2-11)                     |                                   |
| 2011 | South Africa | 2943 (2087-3067)          |                                | 53 (37-55)                        |                                        | 294 (132-576)              |                                 | 5 (2-10)                           |                                         | 262 (118-513)        |                           | 5 (2-9)                      |                                   |
| 2012 | South Africa | 2182 (1547-2274)          |                                | 39 (28-41)                        |                                        | 213 (96-414)               |                                 | 4 (2-7)                            |                                         | 189 (85-369)         |                           | 3 (2-7)                      |                                   |
| 2013 | South Africa | 2016 (1430-2101)          |                                | 37 (26-38)                        |                                        | 202 (93-391)               |                                 | 4 (2-7)                            |                                         | 180 (83-348)         |                           | 3 (2-6)                      |                                   |
| 2014 | South Africa | 1786 (1267-1862)          |                                | 33 (24-35)                        |                                        | 182 (84-351)               |                                 | 3 (2-7)                            |                                         | 162 (75-312)         |                           | 3 (1-6)                      |                                   |
| 2015 | South Africa | 1118 (793-1165)           | 580 (411-605)                  | 21 (15-22)                        | 11 (8-11)                              | 106 (48-203)               | 55 (25-105)                     | 2 (1-4)                            | 1 (0-2)                                 | 94 (44-181)          | 49 (23-94)                | 2 (1-3)                      | 1 (0-2)                           |
| 2000 | South Sudan  | 2919 (2070-3042)          |                                | 249 (176-259)                     |                                        | 454 (244-852)              |                                 | 39 (21-73)                         |                                         | 143 (77-268)         |                           | 12 (7-23)                    |                                   |
| 2001 | South Sudan  | 2928 (2076-3052)          |                                | 240 (170-251)                     |                                        | 452 (244-846)              |                                 | 37 (20-69)                         |                                         | 142 (77-266)         |                           | 12 (6-22)                    |                                   |
| 2002 | South Sudan  | 2836 (2011-2956)          |                                | 226 (161-236)                     |                                        | 433 (236-812)              |                                 | 35 (19-65)                         |                                         | 136 (74-255)         |                           | 11 (6-20)                    |                                   |
| 2003 | South Sudan  | 2730 (1942-2855)          |                                | 214 (152-223)                     |                                        | 414 (228-775)              |                                 | 32 (18-61)                         |                                         | 130 (72-244)         |                           | 10 (6-19)                    |                                   |
| 2004 | South Sudan  | 2651 (1880-2763)          |                                | 202 (143-211)                     |                                        | 394 (151-845)              |                                 | 30 (11-64)                         |                                         | 124 (47-266)         |                           | 9 (4-20)                     |                                   |
| 2005 | South Sudan  | 2518 (1786-2624)          |                                | 186 (132-194)                     |                                        | 370 (143-794)              |                                 | 27 (11-59)                         |                                         | 116 (45-249)         |                           | 9 (3-18)                     |                                   |
| 2006 | South Sudan  | 2457 (1743-2561)          |                                | 176 (125-183)                     |                                        | 356 (140-764)              |                                 | 25 (10-55)                         |                                         | 112 (44-244)         |                           | 8 (3-17)                     |                                   |
| 2007 | South Sudan  | 2410 (1709-2512)          |                                | 166 (118-173)                     |                                        | 346 (137-740)              |                                 | 24 (9-51)                          |                                         | 109 (43-233)         |                           | 8 (3-16)                     |                                   |
| 2008 | South Sudan  | 2444 (1733-2547)          |                                | 162 (115-169)                     |                                        | 351 (140-749)              |                                 | 23 (9-50)                          |                                         | 110 (44-235)         |                           | 7 (3-16)                     |                                   |
| 2009 | South Sudan  | 2434 (1728-2537)          |                                | 155 (110-162)                     |                                        | 352 (141-749)              |                                 | 22 (9-48)                          |                                         | 111 (44-235)         |                           | 7 (3-15)                     |                                   |
| 2010 | South Sudan  | 2437 (1728-2539)          |                                | 150 (106-156)                     |                                        | 359 (145-761)              |                                 | 22 (9-47)                          |                                         | 113 (46-239)         |                           | 7 (3-15)                     |                                   |
| 2011 | South Sudan  | 2434 (1726-2536)          |                                | 143 (102-149)                     |                                        | 368 (150-778)              |                                 | 22 (9-46)                          |                                         | 116 (47-245)         |                           | 7 (3-14)                     |                                   |
| 2012 | South Sudan  | 2345 (1663-2444)          |                                | 133 (94-139)                      |                                        | 364 (148-766)              |                                 | 21 (8-43)                          |                                         | 114 (47-241)         |                           | 6 (3-14)                     |                                   |
| 2013 | South Sudan  | 2367 (1678-2467)          |                                | 130 (92-135)                      |                                        | 374 (154-786)              |                                 | 21 (8-43)                          |                                         | 118 (48-247)         |                           | 6 (3-14)                     |                                   |
| 2014 | South Sudan  | 2323 (1647-2421)          |                                | 124 (88-129)                      |                                        | 373 (154-782)              |                                 | 20 (8-42)                          |                                         | 117 (48-246)         |                           | 6 (3-13)                     |                                   |
| 2015 | South Sudan  | 2287 (1622-2384)          | 430 (305-448)                  | 119 (84-124)                      | 22 (16-23)                             | 370 (154-773)              | 70 (29-146)                     | 19 (8-40)                          | 4 (2-8)                                 | 116 (48-243)         | 22 (9-46)                 | 6 (3-13)                     | 1 (0-2)                           |
| 2000 | Spain        | 18 (13-18)                |                                | 1 (1-1)                           |                                        | 25 (11-46)                 |                                 | 1 (1-2)                            |                                         | 23 (10-41)           |                           | 1 (1-2)                      |                                   |
| 2001 | Spain        | 6 (4-6)                   |                                | 0 (0-0)                           |                                        | 15 (7-28)                  |                                 | 1 (0-1)                            |                                         | 14 (6-25)            |                           | 1 (0-1)                      |                                   |
| 2002 | Spain        | 16 (12-17)                |                                | 1 (1-1)                           |                                        | 15 (7-27)                  |                                 | 1 (0-1)                            |                                         | 13 (6-24)            |                           | 1 (0-1)                      |                                   |
| 2003 | Spain        | 18 (13-19)                |                                | 1 (1-1)                           |                                        | 20 (9-37)                  |                                 | 1 (0-2)                            |                                         | 18 (8-33)            |                           | 1 (0-2)                      |                                   |
| 2004 | Spain        | 14 (10-15)                |                                | 1 (0-1)                           |                                        | 16 (7-29)                  |                                 | 1 (0-1)                            |                                         | 14 (6-26)            |                           | 1 (0-1)                      |                                   |
| 2005 | Spain        | 13 (9-14)                 |                                | 1 (0-1)                           |                                        | 22 (10-40)                 |                                 | 1 (0-2)                            |                                         | 20 (9-35)            |                           | 1 (0-2)                      |                                   |
| 2006 | Spain        | 18 (12-18)                |                                | 1 (1-1)                           |                                        | 18 (8-33)                  |                                 | 1 (0-1)                            |                                         | 16 (7-29)            |                           | 1 (0-1)                      |                                   |
| 2007 | Spain        | 22 (16-23)                |                                | 1 (1-1)                           |                                        | 17 (8-31)                  |                                 | 1 (0-1)                            |                                         | 15 (7-28)            |                           | 1 (0-1)                      |                                   |
| 2008 | Spain        | 13 (9-14)                 |                                | 1 (0-1)                           |                                        | 15 (7-27)                  |                                 | 1 (0-1)                            |                                         | 13 (6-24)            |                           | 1 (0-1)                      |                                   |
| 2009 | Spain        | 17 (12-17)                |                                | 1 (0-1)                           |                                        | 17 (8-31)                  |                                 | 1 (0-1)                            |                                         | 15 (7-28)            |                           | 1 (0-1)                      |                                   |
| 2010 | Spain        | 14 (10-15)                |                                | 1 (0-1)                           |                                        | 9 (4-17)                   |                                 | 0 (0-1)                            |                                         | 8 (4-15)             |                           | 0 (0-1)                      |                                   |
| 2011 | Spain        | 12 (9-13)                 |                                | 1 (0-1)                           |                                        | 10 (5-18)                  |                                 | 0 (0-1)                            |                                         | 9 (4-16)             |                           | 0 (0-1)                      |                                   |
| 2012 | Spain        | 9 (6-9)                   |                                | 0 (0-0)                           |                                        | 7 (3-13)                   |                                 | 0 (0-1)                            |                                         | 6 (3-12)             |                           | 0 (0-1)                      |                                   |
| 2013 | Spain        | 7 (5-7)                   |                                | 0 (0-0)                           |                                        | 10 (5-18)                  |                                 | 0 (0-1)                            |                                         | 9 (4-16)             |                           | 0 (0-1)                      |                                   |
| 2014 | Spain        | 8 (6-8)                   |                                | 0 (0-0)                           |                                        | 8 (4-15)                   |                                 | 0 (0-1)                            |                                         | 7 (3-13)             |                           | 0 (0-1)                      |                                   |
| 2015 | Spain        | 7 (5-8)                   | 0 (0-0)                        | 0 (0-0)                           | 0 (0-0)                                | 7 (3-13)                   | 0 (0-0)                         | 0 (0-1)                            | 0 (0-0)                                 | 6 (3-12)             | 0 (0-0)                   | 0 (0-1)                      | 0 (0-0)                           |
| 2000 | Sri Lanka    | 126 (89-131)              |                                | 8 (6-8)                           |                                        | 15 (4-39)                  |                                 | 1 (0-2)                            |                                         | 13 (3-35)            |                           | 1 (0-2)                      |                                   |
| 2001 | Sri Lanka    | 119 (84-124)              |                                | 7 (5-8)                           |                                        | 14 (3-37)                  |                                 | 1 (0-2)                            |                                         | 12 (3-33)            |                           | 1 (0-2)                      |                                   |
| 2002 | Sri Lanka    | 113 (80-117)              |                                | 7 (5-7)                           |                                        | 13 (3-35)                  |                                 | 1 (0-2)                            |                                         | 12 (3-31)            |                           | 1 (0-2)                      |                                   |
| 2003 | Sri Lanka    | 110 (78-115)              |                                | 7 (5-7)                           |                                        | 13 (3-35)                  |                                 | 1 (0-2)                            |                                         | 12 (3-31)            |                           | 1 (0-2)                      |                                   |
| 2004 | Sri Lanka    | 101 (72-105)              |                                | 6 (4-6)                           |                                        | 12 (3-32)                  |                                 | 1 (0-2)                            |                                         | 11 (2-29)            |                           | 1 (0-2)                      |                                   |
| 2005 | Sri Lanka    | 99 (70-103)               |                                | 6 (4-6)                           |                                        | 12 (3-31)                  |                                 | 1 (0-2)                            |                                         | 11 (3-28)            |                           | 1 (0-2)                      |                                   |
| 2006 | Sri Lanka    | 90 (64-94)                |                                | 5 (4-5)                           |                                        | 11 (3-29)                  |                                 | 1 (0-2)                            |                                         | 10 (2-25)            |                           | 1 (0-1)                      |                                   |
| 2007 | Sri Lanka    | 83 (59-87)                |                                | 5 (3-5)                           |                                        | 10 (3-26)                  |                                 | 1 (0-1)                            |                                         | 9 (2-24)             |                           | 1 (0-1)                      |                                   |
| 2008 | Sri Lanka    | 76 (54-79)                |                                | 4 (3-4)                           |                                        | 9 (2-24)                   |                                 | 1 (0-1)                            |                                         | 8 (2-22)             |                           | 0 (0-1)                      |                                   |
| 2009 | Sri Lanka    | 71 (50-74)                |                                | 4 (3-4)                           |                                        | 9 (2-23)                   |                                 | 0 (0-1)                            |                                         | 8 (2-20)             |                           | 0 (0-1)                      |                                   |
| 2010 | Sri Lanka    | 76 (54-80)                |                                | 4 (3-5)                           |                                        | 17 (4-43)                  |                                 | 1 (0-2)                            |                                         | 15 (4-39)            |                           | 1 (0-2)                      |                                   |
| 2011 | Sri Lanka    | 74 (53-77)                |                                | 4 (3-4)                           |                                        | 17 (4-44)                  |                                 | 1 (0-3)                            |                                         | 15 (4-39)            |                           | 1 (0-2)                      |                                   |
| 2012 | Sri Lanka    | 70 (50-73)                |                                | 4 (3-4)                           |                                        | 16 (4-41)                  |                                 | 1 (0-2)                            |                                         | 14 (4-37)            |                           | 1 (0-2)                      |                                   |
| 2013 | Sri Lanka    | 67 (47-69)                |                                | 4 (3-4)                           |                                        | 15 (4-39)                  |                                 | 1 (0-2)                            |                                         | 13 (4-35)            |                           | 1 (0-2)                      |                                   |
| 2014 | Sri Lanka    | 62 (44-65)                |                                | 4 (3-4)                           |                                        | 14 (4-36)                  |                                 | 1 (0-2)                            |                                         | 12 (3-32)            |                           | 1 (0-2)                      |                                   |
| 2015 | Sri Lanka    | 61 (43-63)                | 0 (0-0)                        | 4 (3-4)                           | 0 (0-0)                                | 14 (4-35)                  | 0 (0-0)                         | 1 (0-2)                            | 0 (0-0)                                 | 12 (3-32)            | 0 (0-0)                   | 1 (0-2)                      | 0 (0-0)                           |
| 2000 | Sudan        | 7034 (4988-7330)          |                                | 149 (106-156)                     |                                        | 1162 (597-2148)            |                                 | 25 (13-46)                         |                                         | 365 (188-675)        |                           | 8 (4-14)                     |                                   |
| 2001 | Sudan        | 7230 (5127-7534)          |                                | 150 (106-157)                     |                                        | 1161 (594-2205)            |                                 | 25 (12-46)                         |                                         | 371 (187-693)        |                           | 8 (4-14)                     |                                   |
| 2002 | Sudan        | 7214 (5116-7519)          |                                | 147 (104-153)                     |                                        | 1164 (574-2194)            |                                 | 24 (12-45)                         |                                         | 366 (181-690)        |                           | 7 (4-14)                     |                                   |
| 2003 | Sudan        | 7213 (5115-7517)          |                                | 143 (102-149)                     |                                        | 1148 (556-2187)            |                                 | 23 (11-43)                         |                                         | 361 (175-687)        |                           | 7 (3-14)                     |                                   |
| 2004 | Sudan        | 7168 (5083-7470)          |                                | 139 (99-145)                      |                                        | 1123 (534-2164)            |                                 | 22 (10-42)                         |                                         | 353 (168-680)        |                           | 7 (3-13)                     |                                   |
| 2005 | Sudan        | 6914 (4903-7208)          |                                | 132 (94-138)                      |                                        | 1066 (499-2077)            |                                 | 20 (10-40)                         |                                         | 335 (157-653)        |                           | 6 (3-12)                     |                                   |
| 2006 | Sudan        | 6820 (4836-7108)          |                                | 128 (91-133)                      |                                        | 1036 (476-2038)            |                                 | 19 (9-38)                          |                                         | 326 (150-641)        |                           | 6 (3-12)                     |                                   |
| 2007 | Sudan        | 6692 (4745-6974)          |                                | 124 (88-129)                      |                                        | 1002 (454-1992)            |                                 | 18 (8-37)                          |                                         | 315 (143-626)        |                           | 6 (3-12)                     |                                   |
| 2008 | Sudan        | 6723 (4768-7007)          |                                | 123 (87-128)                      |                                        | 996 (444-2000)             |                                 | 18 (8-37)                          |                                         | 313 (139-629)        |                           | 6 (3-11)                     |                                   |
| 2009 | Sudan        | 6541 (4638-6817)          |                                | 119 (84-124)                      |                                        | 961 (421-1947)             |                                 | 17 (8-35)                          |                                         | 302 (132-612)        |                           | 5 (2-11)                     |                                   |
| 2010 | Sudan        | 6377 (4522-6645)          |                                | 115 (81-119)                      |                                        | 931 (402-1904)             |                                 | 17 (7-34)                          |                                         | 293 (126-598)        |                           | 5 (2-11)                     |                                   |
| 2011 | Sudan        | 6311 (4475-6577)          |                                | 113 (80-117)                      |                                        | 914 (389-1889)             |                                 | 16 (7-34)                          |                                         | 287 (122-594)        |                           | 5 (2-11)                     |                                   |
| 2012 | Sudan        | 6103 (4328-6360)          |                                | 108 (77-112)                      |                                        | 878 (369-1833)             |                                 | 16 (7-32)                          |                                         | 276 (116-578)        |                           | 5 (2-10)                     |                                   |
| 2013 | Sudan        | 5430 (3850-5659)          |                                | 95 (67-99)                        |                                        | 765 (287-1660)             |                                 | 13 (6-29)                          |                                         | 681 (238-1478)       |                           | 12 (6-26)                    |                                   |
| 2014 | Sudan        | 3637 (2579-3790)          |                                | 63 (45-66)                        |                                        | 480 (165-1050)             |                                 | 8 (3-18)                           |                                         | 427 (147-935)        |                           | 7 (3-16)                     |                                   |
| 2015 | Sudan        | 3072 (2178-3201)          | 47 (33-49)                     | 52 (37-55)                        | 1 (1-1)                                | 412 (139-909)              | 6 (2-14)                        | 7 (2-16)                           | 0 (0-0)                                 | 367 (124-810)        | 6 (2-12)                  | 6 (2-14)                     | 0 (0-0)                           |
| 2000 | Suriname     | 7 (5-7)                   |                                | 13 (9-13)                         |                                        | 2 (1-5)                    |                                 | 4 (1-9)                            |                                         | 2 (0-4)              |                           | 3 (1-8)                      |                                   |
| 2001 | Suriname     | 7 (5-7)                   |                                | 13 (9-13)                         |                                        | 1 (0-4)                    |                                 | 3 (1-7)                            |                                         | 1 (0-3)              |                           | 2 (1-6)                      |                                   |
| 2002 | Suriname     | 4 (3-4)                   |                                | 7 (5-7)                           |                                        | 3 (1-9)                    |                                 | 7 (2-17)                           |                                         | 3 (1-8)              |                           | 6 (2-15)                     |                                   |
| 2003 | Suriname     | 10 (7-11)                 |                                | 20 (15-21)                        |                                        | 1 (0-2)                    |                                 | 2 (1-4)                            |                                         | 1 (0-2)              |                           | 1 (0-4)                      |                                   |
| 2004 | Suriname     | 4 (3-4)                   |                                | 8 (6-8)                           |                                        | 1 (0-4)                    |                                 | 3 (1-7)                            |                                         | 1 (0-3)              |                           | 3 (1-7)                      |                                   |
| 2005 | Suriname     | 10 (7-10)                 |                                | 20 (14-21)                        |                                        | 1 (0-2)                    |                                 | 1 (0-4)                            |                                         | 1 (0-2)              |                           | 1 (0-3)                      |                                   |
| 2006 | Suriname     | 7 (5-7)                   |                                | 14 (10-14)                        |                                        | 3 (1-9)                    |                                 | 6 (2-18)                           |                                         | 3 (1-8)              |                           | 5 (1-16)                     |                                   |
| 2007 | Suriname     | 9 (7-10)                  |                                | 20 (14-20)                        |                                        | 1 (0-2)                    |                                 | 2 (0-4)                            |                                         | 1 (0-2)              |                           | 1 (0-4)                      |                                   |
| 2008 | Suriname     | 6 (4-6)                   |                                | 12 (9-13)                         |                                        | 2 (1-6)                    |                                 | 4 (1-13)                           |                                         | 2 (1-5)              |                           | 4 (1-11)                     |                                   |
| 2009 | Suriname     | 8 (6-9)                   |                                | 17 (12-18)                        |                                        | 2 (1-7)                    |                                 | 5 (1-14)                           |                                         | 2 (1-6)              |                           | 4 (1-13)                     |                                   |
| 2010 | Suriname     | 9 (6-9)                   |                                | 18 (13-19)                        |                                        | 4 (1-12)                   |                                 | 9 (3-25)                           |                                         | 4 (1-11)             |                           | 8 (2-23)                     |                                   |
| 2011 | Suriname     | 6 (4-6)                   |                                | 12 (9-13)                         |                                        | 2 (1-6)                    |                                 | 5 (1-13)                           |                                         | 2 (1-6)              |                           | 4 (1-12)                     |                                   |
| 2012 | Suriname     | 8 (6-8)                   |                                | 16 (11-17)                        |                                        | 0 (0-0)                    |                                 | 0 (0-0)                            |                                         | 0 (0-0)              |                           | 0 (0-0)                      |                                   |
| 2013 | Suriname     | 7 (5-7)                   |                                | 14 (10-15)                        |                                        | 2 (1-5)                    |                                 | 4 (1-11)                           |                                         | 2 (0-5)              |                           | 4 (1-10)                     |                                   |

| Year | Country              | Spn pneumonia deaths (UR) | Spn pneumonia deaths, HIV (UR) | Spn pneumonia mortality rate (UR) | Spn pneumonia mortality rate, HIV (UR) | Spn meningitis deaths (UR) | Spn meningitis deaths, HIV (UR) | Spn meningitis mortality rate (UR) | Spn meningitis mortality rate, HIV (UR) | Spn NPNM deaths, HIV (UR) | Spn NPNM mortality rate (UR) | Spn NPNM mortality rate, HIV (UR) |
|------|----------------------|---------------------------|--------------------------------|-----------------------------------|----------------------------------------|----------------------------|---------------------------------|------------------------------------|-----------------------------------------|---------------------------|------------------------------|-----------------------------------|
| 2015 | Suriname             | 6 (5-7)                   | 0 (0-0)                        | 14 (10-14)                        | 0 (0-0)                                | 2 (1-5)                    | 0 (0-0)                         | 4 (1-11)                           | 0 (0-0)                                 | 2 (0-4)                   | 0 (0-0)                      | 3 (1-9)                           |
| 2000 | Swaziland            | 209 (148-218)             |                                | 135 (96-141)                      |                                        | 26 (12-52)                 |                                 | 17 (7-34)                          |                                         | 8 (4-16)                  |                              | 5 (2-11)                          |
| 2001 | Swaziland            | 215 (152-224)             |                                | 140 (99-146)                      |                                        | 27 (12-53)                 |                                 | 17 (8-34)                          |                                         | 8 (4-17)                  |                              | 5 (2-11)                          |
| 2002 | Swaziland            | 218 (155-228)             |                                | 143 (101-149)                     |                                        | 27 (13-54)                 |                                 | 18 (8-35)                          |                                         | 9 (4-17)                  |                              | 6 (3-11)                          |
| 2003 | Swaziland            | 221 (157-230)             |                                | 145 (103-151)                     |                                        | 28 (13-54)                 |                                 | 18 (9-35)                          |                                         | 9 (4-17)                  |                              | 6 (3-11)                          |
| 2004 | Swaziland            | 221 (156-230)             |                                | 145 (103-151)                     |                                        | 28 (13-53)                 |                                 | 18 (9-35)                          |                                         | 9 (4-17)                  |                              | 6 (3-11)                          |
| 2005 | Swaziland            | 219 (156-229)             |                                | 144 (102-150)                     |                                        | 28 (14-52)                 |                                 | 18 (9-34)                          |                                         | 9 (4-16)                  |                              | 6 (3-11)                          |
| 2006 | Swaziland            | 214 (152-223)             |                                | 139 (99-145)                      |                                        | 27 (14-50)                 |                                 | 18 (9-33)                          |                                         | 8 (4-16)                  |                              | 6 (3-10)                          |
| 2007 | Swaziland            | 209 (148-218)             |                                | 134 (95-140)                      |                                        | 26 (13-49)                 |                                 | 17 (9-32)                          |                                         | 8 (4-15)                  |                              | 5 (3-10)                          |
| 2008 | Swaziland            | 202 (143-211)             |                                | 129 (91-134)                      |                                        | 25 (12-48)                 |                                 | 16 (8-31)                          |                                         | 8 (4-15)                  |                              | 5 (2-10)                          |
| 2009 | Swaziland            | 193 (137-201)             |                                | 121 (86-126)                      |                                        | 24 (11-47)                 |                                 | 15 (7-29)                          |                                         | 7 (3-15)                  |                              | 5 (2-9)                           |
| 2010 | Swaziland            | 182 (129-190)             |                                | 113 (80-118)                      |                                        | 22 (10-45)                 |                                 | 14 (6-28)                          |                                         | 7 (3-14)                  |                              | 4 (2-9)                           |
| 2011 | Swaziland            | 173 (123-180)             |                                | 105 (74-109)                      |                                        | 21 (9-42)                  |                                 | 13 (6-26)                          |                                         | 7 (3-13)                  |                              | 4 (2-8)                           |
| 2012 | Swaziland            | 166 (118-173)             |                                | 98 (70-104)                       |                                        | 20 (8-41)                  |                                 | 12 (5-25)                          |                                         | 18 (7-37)                 |                              | 11 (4-22)                         |
| 2013 | Swaziland            | 159 (113-166)             |                                | 95 (67-99)                        |                                        | 19 (8-39)                  |                                 | 11 (5-23)                          |                                         | 17 (7-35)                 |                              | 10 (4-21)                         |
| 2014 | Swaziland            | 115 (81-120)              |                                | 68 (48-71)                        |                                        | 13 (5-27)                  |                                 | 8 (3-16)                           |                                         | 12 (5-24)                 |                              | 7 (3-14)                          |
| 2015 | Swaziland            | 88 (63-92)                | 51 (36-53)                     | 52 (37-54)                        | 30 (21-31)                             | 10 (4-20)                  | 6 (2-12)                        | 6 (2-12)                           | 3 (1-7)                                 | 9 (4-18)                  | 5 (2-10)                     | 5 (2-11)                          |
| 2000 | Sweden               | 2 (1-2)                   |                                | 0 (0-0)                           |                                        | 1 (1-3)                    |                                 | 0 (0-1)                            |                                         | 1 (1-2)                   |                              | 0 (0-1)                           |
| 2001 | Sweden               | 2 (2-2)                   |                                | 1 (0-1)                           |                                        | 1 (1-2)                    |                                 | 0 (0-1)                            |                                         | 1 (1-2)                   |                              | 0 (0-1)                           |
| 2002 | Sweden               | 2 (1-2)                   |                                | 0 (0-0)                           |                                        | 2 (1-4)                    |                                 | 1 (0-1)                            |                                         | 2 (1-4)                   |                              | 0 (0-1)                           |
| 2003 | Sweden               | 4 (3-4)                   |                                | 1 (1-1)                           |                                        | 2 (1-3)                    |                                 | 0 (0-1)                            |                                         | 2 (1-3)                   |                              | 0 (0-1)                           |
| 2004 | Sweden               | 5 (4-5)                   |                                | 1 (1-1)                           |                                        | 2 (1-3)                    |                                 | 0 (0-1)                            |                                         | 1 (1-2)                   |                              | 0 (0-1)                           |
| 2005 | Sweden               | 5 (3-5)                   |                                | 1 (1-1)                           |                                        | 2 (1-3)                    |                                 | 0 (0-1)                            |                                         | 2 (1-3)                   |                              | 0 (0-1)                           |
| 2006 | Sweden               | 3 (2-3)                   |                                | 1 (0-1)                           |                                        | 1 (1-3)                    |                                 | 0 (0-0)                            |                                         | 1 (1-2)                   |                              | 0 (0-0)                           |
| 2007 | Sweden               | 4 (3-4)                   |                                | 1 (1-1)                           |                                        | 3 (1-5)                    |                                 | 1 (0-1)                            |                                         | 2 (1-4)                   |                              | 0 (0-1)                           |
| 2008 | Sweden               | 7 (5-7)                   |                                | 1 (1-1)                           |                                        | 0 (0-1)                    |                                 | 0 (0-0)                            |                                         | 0 (0-1)                   |                              | 0 (0-0)                           |
| 2009 | Sweden               | 2 (2-2)                   |                                | 0 (0-0)                           |                                        | 0 (0-0)                    |                                 | 0 (0-0)                            |                                         | 0 (0-0)                   |                              | 0 (0-0)                           |
| 2010 | Sweden               | 2 (2-3)                   |                                | 0 (0-0)                           |                                        | 1 (0-1)                    |                                 | 0 (0-0)                            |                                         | 1 (0-1)                   |                              | 0 (0-0)                           |
| 2011 | Sweden               | 3 (2-3)                   |                                | 0 (0-0)                           |                                        | 0 (0-0)                    |                                 | 0 (0-0)                            |                                         | 0 (0-0)                   |                              | 0 (0-0)                           |
| 2012 | Sweden               | 1 (1-1)                   |                                | 0 (0-0)                           |                                        | 0 (0-1)                    |                                 | 0 (0-0)                            |                                         | 0 (0-1)                   |                              | 0 (0-0)                           |
| 2013 | Sweden               | 2 (1-2)                   |                                | 0 (0-0)                           |                                        | 0 (0-0)                    |                                 | 0 (0-0)                            |                                         | 0 (0-0)                   |                              | 0 (0-0)                           |
| 2014 | Sweden               | 2 (1-2)                   |                                | 0 (0-0)                           |                                        | 0 (0-0)                    |                                 | 0 (0-0)                            |                                         | 0 (0-0)                   |                              | 0 (0-0)                           |
| 2015 | Sweden               | 2 (1-2)                   | 0 (0-0)                        | 0 (0-0)                           | 0 (0-0)                                | 0 (0-0)                    | 0 (0-0)                         | 0 (0-0)                            | 0 (0-0)                                 | 0 (0-0)                   | 0 (0-0)                      | 0 (0-0)                           |
| 2000 | Switzerland          | 2 (1-2)                   |                                | 0 (0-0)                           |                                        | 3 (1-6)                    |                                 | 1 (0-1)                            |                                         | 3 (1-5)                   |                              | 1 (0-1)                           |
| 2001 | Switzerland          | 3 (2-4)                   |                                | 1 (1-1)                           |                                        | 4 (2-7)                    |                                 | 1 (0-2)                            |                                         | 4 (2-7)                   |                              | 1 (0-2)                           |
| 2002 | Switzerland          | 3 (2-3)                   |                                | 1 (1-1)                           |                                        | 4 (2-8)                    |                                 | 1 (1-2)                            |                                         | 4 (2-7)                   |                              | 1 (0-2)                           |
| 2003 | Switzerland          | 2 (1-2)                   |                                | 1 (0-1)                           |                                        | 2 (1-4)                    |                                 | 1 (0-1)                            |                                         | 2 (1-4)                   |                              | 1 (0-1)                           |
| 2004 | Switzerland          | 1 (1-1)                   |                                | 0 (0-0)                           |                                        | 0 (0-0)                    |                                 | 0 (0-0)                            |                                         | 0 (0-1)                   |                              | 0 (0-0)                           |
| 2005 | Switzerland          | 3 (2-3)                   |                                | 1 (1-1)                           |                                        | 2 (1-4)                    |                                 | 1 (0-1)                            |                                         | 2 (1-4)                   |                              | 0 (0-1)                           |
| 2006 | Switzerland          | 1 (1-1)                   |                                | 0 (0-0)                           |                                        | 2 (1-3)                    |                                 | 1 (0-1)                            |                                         | 2 (1-3)                   |                              | 0 (0-1)                           |
| 2007 | Switzerland          | 1 (1-1)                   |                                | 0 (0-0)                           |                                        | 1 (0-2)                    |                                 | 0 (0-1)                            |                                         | 1 (0-2)                   |                              | 0 (0-0)                           |
| 2008 | Switzerland          | 2 (2-2)                   |                                | 1 (0-1)                           |                                        | 1 (0-1)                    |                                 | 0 (0-0)                            |                                         | 1 (0-1)                   |                              | 0 (0-0)                           |
| 2009 | Switzerland          | 2 (1-2)                   |                                | 0 (0-0)                           |                                        | 2 (1-4)                    |                                 | 1 (0-1)                            |                                         | 2 (1-3)                   |                              | 0 (0-1)                           |
| 2010 | Switzerland          | 2 (1-2)                   |                                | 1 (0-1)                           |                                        | 1 (0-1)                    |                                 | 0 (0-0)                            |                                         | 1 (0-1)                   |                              | 0 (0-0)                           |
| 2011 | Switzerland          | 1 (1-1)                   |                                | 0 (0-0)                           |                                        | 0 (0-1)                    |                                 | 0 (0-0)                            |                                         | 0 (0-1)                   |                              | 0 (0-0)                           |
| 2012 | Switzerland          | 0 (0-0)                   |                                | 0 (0-0)                           |                                        | 0 (0-0)                    |                                 | 0 (0-0)                            |                                         | 0 (0-0)                   |                              | 0 (0-0)                           |
| 2013 | Switzerland          | 0 (0-0)                   |                                | 0 (0-0)                           |                                        | 0 (0-0)                    |                                 | 0 (0-0)                            |                                         | 0 (0-0)                   |                              | 0 (0-0)                           |
| 2014 | Switzerland          | 0 (0-0)                   |                                | 0 (0-0)                           |                                        | 0 (0-0)                    |                                 | 0 (0-0)                            |                                         | 0 (0-0)                   |                              | 0 (0-0)                           |
| 2015 | Switzerland          | 0 (0-0)                   | 0 (0-0)                        | 0 (0-0)                           | 0 (0-0)                                | 0 (0-0)                    | 0 (0-0)                         | 0 (0-0)                            | 0 (0-0)                                 | 0 (0-0)                   | 0 (0-0)                      | 0 (0-0)                           |
| 2000 | Syrian Arab Republic | 476 (338-496)             |                                | 20 (14-21)                        |                                        | 21 (6-55)                  |                                 | 1 (0-2)                            |                                         | 19 (5-49)                 |                              | 1 (0-2)                           |
| 2001 | Syrian Arab Republic | 479 (340-499)             |                                | 20 (14-21)                        |                                        | 38 (10-97)                 |                                 | 2 (0-4)                            |                                         | 34 (9-86)                 |                              | 1 (0-4)                           |
| 2002 | Syrian Arab Republic | 443 (314-462)             |                                | 18 (13-19)                        |                                        | 37 (11-93)                 |                                 | 2 (0-4)                            |                                         | 33 (9-83)                 |                              | 1 (0-3)                           |
| 2003 | Syrian Arab Republic | 396 (281-412)             |                                | 17 (12-17)                        |                                        | 34 (10-84)                 |                                 | 1 (0-3)                            |                                         | 30 (9-74)                 |                              | 1 (0-3)                           |
| 2004 | Syrian Arab Republic | 358 (254-373)             |                                | 15 (11-16)                        |                                        | 31 (10-76)                 |                                 | 1 (0-3)                            |                                         | 28 (9-67)                 |                              | 1 (0-3)                           |
| 2005 | Syrian Arab Republic | 331 (235-345)             |                                | 14 (10-14)                        |                                        | 29 (10-69)                 |                                 | 1 (0-3)                            |                                         | 26 (9-62)                 |                              | 1 (0-3)                           |
| 2006 | Syrian Arab Republic | 318 (225-331)             |                                | 13 (9-14)                         |                                        | 29 (11-68)                 |                                 | 1 (0-3)                            |                                         | 26 (9-61)                 |                              | 1 (0-3)                           |
| 2007 | Syrian Arab Republic | 310 (220-323)             |                                | 13 (9-13)                         |                                        | 29 (11-65)                 |                                 | 1 (0-3)                            |                                         | 26 (10-58)                |                              | 1 (0-2)                           |
| 2008 | Syrian Arab Republic | 299 (212-312)             |                                | 12 (9-13)                         |                                        | 28 (11-61)                 |                                 | 1 (0-2)                            |                                         | 25 (10-54)                |                              | 1 (0-2)                           |
| 2009 | Syrian Arab Republic | 291 (206-303)             |                                | 12 (8-12)                         |                                        | 27 (12-57)                 |                                 | 1 (0-2)                            |                                         | 24 (11-50)                |                              | 1 (0-2)                           |
| 2010 | Syrian Arab Republic | 262 (186-273)             |                                | 11 (7-11)                         |                                        | 24 (11-49)                 |                                 | 1 (0-2)                            |                                         | 22 (10-43)                |                              | 1 (0-2)                           |
| 2011 | Syrian Arab Republic | 231 (164-240)             |                                | 9 (7-10)                          |                                        | 21 (11-40)                 |                                 | 1 (0-2)                            |                                         | 19 (10-36)                |                              | 1 (0-1)                           |
| 2012 | Syrian Arab Republic | 184 (130-192)             |                                | 8 (5-8)                           |                                        | 16 (9-28)                  |                                 | 1 (0-1)                            |                                         | 14 (8-25)                 |                              | 1 (0-1)                           |
| 2013 | Syrian Arab Republic | 148 (105-154)             |                                | 6 (5-7)                           |                                        | 13 (8-21)                  |                                 | 1 (0-1)                            |                                         | 11 (7-19)                 |                              | 0 (0-1)                           |
| 2014 | Syrian Arab Republic | 127 (80-132)              |                                | 6 (4-6)                           |                                        | 11 (7-17)                  |                                 | 1 (0-1)                            |                                         | 10 (7-15)                 |                              | 0 (0-1)                           |
| 2015 | Syrian Arab Republic | 123 (87-128)              | 0 (0-0)                        | 6 (4-6)                           | 0 (0-0)                                | 11 (7-16)                  | 0 (0-0)                         | 1 (0-1)                            | 0 (0-0)                                 | 10 (6-14)                 | 0 (0-0)                      | 0 (0-1)                           |
| 2000 | Tajikistan           | 1247 (884-1299)           |                                | 143 (101-149)                     |                                        | 234 (91-505)               |                                 | 27 (10-58)                         |                                         | 74 (28-159)               |                              | 8 (3-18)                          |
| 2001 | Tajikistan           | 1128 (800-1176)           |                                | 130 (92-135)                      |                                        | 209 (83-446)               |                                 | 24 (10-51)                         |                                         | 66 (26-140)               |                              | 8 (3-16)                          |
| 2002 | Tajikistan           | 1006 (713-1048)           |                                | 117 (83-122)                      |                                        | 183 (74-388)               |                                 | 21 (9-45)                          |                                         | 58 (23-122)               |                              | 7 (3-14)                          |
| 2003 | Tajikistan           | 895 (635-933)             |                                | 105 (75-110)                      |                                        | 160 (57-346)               |                                 | 19 (7-41)                          |                                         | 142 (51-308)              |                              | 17 (6-36)                         |
| 2004 | Tajikistan           | 813 (577-848)             |                                | 96 (68-101)                       |                                        | 142 (53-306)               |                                 | 17 (6-36)                          |                                         | 127 (47-272)              |                              | 15 (6-32)                         |
| 2005 | Tajikistan           | 756 (536-788)             |                                | 89 (63-93)                        |                                        | 130 (50-276)               |                                 | 15 (6-33)                          |                                         | 115 (44-246)              |                              | 14 (6-29)                         |
| 2006 | Tajikistan           | 717 (508-747)             |                                | 84 (60-88)                        |                                        | 121 (46-257)               |                                 | 14 (5-30)                          |                                         | 108 (41-229)              |                              | 13 (5-27)                         |
| 2007 | Tajikistan           | 700 (496-729)             |                                | 81 (57-84)                        |                                        | 116 (44-247)               |                                 | 13 (5-29)                          |                                         | 104 (39-220)              |                              | 12 (5-25)                         |
| 2008 | Tajikistan           | 697 (494-726)             |                                | 78 (55-81)                        |                                        | 114 (44-243)               |                                 | 13 (5-27)                          |                                         | 102 (39-217)              |                              | 11 (4-24)                         |
| 2009 | Tajikistan           | 708 (502-738)             |                                | 76 (54-79)                        |                                        | 115 (44-245)               |                                 | 12 (5-26)                          |                                         | 103 (39-218)              |                              | 11 (4-23)                         |
| 2010 | Tajikistan           | 717 (509-748)             |                                | 74 (53-77)                        |                                        | 116 (44-246)               |                                 | 12 (5-26)                          |                                         | 103 (39-219)              |                              | 11 (4-23)                         |
| 2011 | Tajikistan           | 724 (514-755)             |                                | 72 (51-75)                        |                                        | 116 (44-246)               |                                 | 11 (5-24)                          |                                         | 103 (39-219)              |                              | 10 (4-22)                         |
| 2012 | Tajikistan           | 729 (517-760)             |                                | 69 (49-72)                        |                                        | 115 (43-245)               |                                 | 11 (4-23)                          |                                         | 102 (39-218)              |                              | 10 (4-21)                         |
| 2013 | Tajikistan           | 727 (516-758)             |                                | 66 (47-69)                        |                                        | 114 (43-243)               |                                 | 10 (4-22)                          |                                         | 101 (38-216)              |                              | 9 (3-20)                          |
| 2014 | Tajikistan           | 720 (510-750)             |                                | 64 (45-67)                        |                                        | 112 (42-239)               |                                 | 10 (4-21)                          |                                         | 100 (37-212)              |                              | 9 (3-19)                          |
| 2015 | Tajikistan           | 700 (496-729)             | 13 (9-14)                      | 61 (43-63)                        | 1 (1-1)                                | 108 (41-231)               | 2 (1-4)                         | 9 (4-20)                           | 0 (0-0)                                 | 96 (36-206)               | 2 (1-4)                      | 8 (3-18)                          |
| 2000 | Thailand             | 635 (450-662)             |                                | 14 (10-14)                        |                                        | 74 (30-162)                |                                 | 2 (1-4)                            |                                         | 66 (27-144)               |                              | 1 (1-3)                           |
| 2001 | Thailand             | 582 (413-607)             |                                | 13 (9-13)                         |                                        | 69 (28-150)                |                                 | 2 (1-3)                            |                                         | 61 (25-133)               |                              | 1 (1-3)                           |
| 2002 | Thailand             | 540 (383-563)             |                                | 12 (9-13)                         |                                        | 65 (24-140)                |                                 | 1 (1-3)                            |                                         | 58 (24-125)               |                              | 1 (1-3)                           |
| 2003 | Thailand             | 504 (357-525)             |                                | 11 (8-12)                         |                                        | 61 (25-132)                |                                 | 1 (1-3)                            |                                         | 54 (23-117)               |                              | 1 (1-3)                           |
| 2004 | Thailand             | 465 (330-484)             |                                | 10 (7-11)                         |                                        | 57 (24-122)                |                                 | 1 (1-3)                            |                                         | 51 (21-109)               |                              | 1 (0-2)                           |
| 2005 | Thailand             | 423 (300-440)             |                                | 10 (7-10)                         |                                        | 52 (22-112)                |                                 | 1 (1-3)                            |                                         | 47 (20-100)               |                              | 1 (0-2)                           |
| 2006 | Thailand             | 387 (274-403)             |                                | 9 (6-9)                           |                                        | 48 (20-103)                |                                 | 1 (0-2)                            |                                         | 43 (18-92)                |                              | 1 (0-2)                           |

Spn = *Streptococcus pneumoniae*; npnm = non-pneumonia, non-meningitis; HIV = deaths only in HIV-infected children; Uncertainty range provided in parentheses.

| Year | Country                                   | Spn pneumonia deaths (UR) | Spn pneumonia deaths, HIV (UR) | Spn pneumonia mortality rate (UR) | Spn pneumonia mortality rate, HIV (UR) | Spn meningitis deaths (UR) | Spn meningitis deaths, HIV (UR) | Spn meningitis mortality rate (UR) | Spn meningitis mortality rate, HIV (UR) | Spn NPNM deaths (UR) | Spn NPNM deaths, HIV (UR) | Spn NPNM mortality rate (UR) | Spn NPNM mortality rate, HIV (UR) |
|------|-------------------------------------------|---------------------------|--------------------------------|-----------------------------------|----------------------------------------|----------------------------|---------------------------------|------------------------------------|-----------------------------------------|----------------------|---------------------------|------------------------------|-----------------------------------|
| 2007 | Thailand                                  | 355 (251-370)             |                                | 8 (6-9)                           |                                        | 45 (19-95)                 |                                 | 1 (0-2)                            |                                         | 40 (17-85)           |                           | 1 (0-2)                      |                                   |
| 2008 | Thailand                                  | 322 (228-335)             |                                | 8 (6-8)                           |                                        | 41 (17-87)                 |                                 | 1 (0-2)                            |                                         | 36 (15-77)           |                           | 1 (0-2)                      |                                   |
| 2009 | Thailand                                  | 302 (214-314)             |                                | 8 (5-8)                           |                                        | 38 (16-82)                 |                                 | 1 (0-2)                            |                                         | 34 (14-73)           |                           | 1 (0-2)                      |                                   |
| 2010 | Thailand                                  | 285 (202-297)             |                                | 7 (5-8)                           |                                        | 36 (15-77)                 |                                 | 1 (0-2)                            |                                         | 32 (13-69)           |                           | 1 (0-2)                      |                                   |
| 2011 | Thailand                                  | 268 (190-280)             |                                | 7 (5-7)                           |                                        | 34 (14-72)                 |                                 | 1 (0-2)                            |                                         | 30 (12-64)           |                           | 1 (0-2)                      |                                   |
| 2012 | Thailand                                  | 252 (179-263)             |                                | 7 (5-7)                           |                                        | 31 (13-68)                 |                                 | 1 (0-2)                            |                                         | 28 (12-60)           |                           | 1 (0-2)                      |                                   |
| 2013 | Thailand                                  | 239 (170-249)             |                                | 6 (4-7)                           |                                        | 29 (12-63)                 |                                 | 1 (0-2)                            |                                         | 26 (11-56)           |                           | 1 (0-1)                      |                                   |
| 2014 | Thailand                                  | 225 (159-234)             |                                | 6 (4-6)                           |                                        | 27 (11-59)                 |                                 | 1 (0-2)                            |                                         | 24 (10-52)           |                           | 1 (0-1)                      |                                   |
| 2015 | Thailand                                  | 219 (155-228)             | 0 (0-0)                        | 6 (4-6)                           | 0 (0-0)                                | 26 (11-56)                 | 0 (0-0)                         | 1 (0-2)                            | 0 (0-0)                                 | 23 (10-50)           | 0 (0-0)                   | 1 (0-1)                      | 0 (0-0)                           |
| 2000 | The former Yugoslav Republic of Macedonia | 11 (8-12)                 |                                | 8 (6-9)                           |                                        | 1 (0-2)                    |                                 | 1 (0-1)                            |                                         | 1 (0-2)              |                           | 0 (0-1)                      |                                   |
| 2001 | The former Yugoslav Republic of Macedonia | 12 (9-13)                 |                                | 9 (7-10)                          |                                        | 1 (1-4)                    |                                 | 1 (0-3)                            |                                         | 1 (1-3)              |                           | 1 (0-3)                      |                                   |
| 2002 | The former Yugoslav Republic of Macedonia | 10 (7-11)                 |                                | 8 (6-8)                           |                                        | 1 (1-4)                    |                                 | 1 (0-3)                            |                                         | 1 (1-3)              |                           | 1 (0-3)                      |                                   |
| 2003 | The former Yugoslav Republic of Macedonia | 9 (7-10)                  |                                | 7 (5-8)                           |                                        | 1 (1-3)                    |                                 | 1 (0-3)                            |                                         | 1 (0-3)              |                           | 1 (0-3)                      |                                   |
| 2004 | The former Yugoslav Republic of Macedonia | 9 (6-9)                   |                                | 7 (5-7)                           |                                        | 1 (1-3)                    |                                 | 1 (0-3)                            |                                         | 1 (1-3)              |                           | 1 (0-2)                      |                                   |
| 2005 | The former Yugoslav Republic of Macedonia | 8 (6-8)                   |                                | 6 (5-7)                           |                                        | 0 (0-1)                    |                                 | 0 (0-1)                            |                                         | 0 (0-1)              |                           | 0 (0-1)                      |                                   |
| 2006 | The former Yugoslav Republic of Macedonia | 7 (5-8)                   |                                | 6 (4-6)                           |                                        | 1 (0-2)                    |                                 | 1 (0-2)                            |                                         | 1 (0-2)              |                           | 1 (0-1)                      |                                   |
| 2007 | The former Yugoslav Republic of Macedonia | 6 (4-6)                   |                                | 5 (3-5)                           |                                        | 2 (1-6)                    |                                 | 2 (1-5)                            |                                         | 2 (1-5)              |                           | 2 (1-5)                      |                                   |
| 2008 | The former Yugoslav Republic of Macedonia | 3 (2-3)                   |                                | 2 (2-3)                           |                                        | 1 (0-3)                    |                                 | 1 (0-2)                            |                                         | 1 (0-2)              |                           | 1 (0-2)                      |                                   |
| 2009 | The former Yugoslav Republic of Macedonia | 7 (5-7)                   |                                | 6 (4-7)                           |                                        | 1 (1-3)                    |                                 | 1 (0-3)                            |                                         | 1 (0-3)              |                           | 1 (0-2)                      |                                   |
| 2010 | The former Yugoslav Republic of Macedonia | 6 (4-6)                   |                                | 5 (4-5)                           |                                        | 2 (1-6)                    |                                 | 2 (1-5)                            |                                         | 2 (1-5)              |                           | 2 (1-5)                      |                                   |
| 2011 | The former Yugoslav Republic of Macedonia | 4 (3-5)                   |                                | 4 (3-4)                           |                                        | 1 (1-3)                    |                                 | 1 (1-3)                            |                                         | 1 (1-3)              |                           | 1 (1-3)                      |                                   |
| 2012 | The former Yugoslav Republic of Macedonia | 4 (3-4)                   |                                | 4 (3-4)                           |                                        | 1 (1-3)                    |                                 | 1 (1-3)                            |                                         | 1 (0-3)              |                           | 1 (0-2)                      |                                   |
| 2013 | The former Yugoslav Republic of Macedonia | 4 (3-4)                   |                                | 3 (2-3)                           |                                        | 1 (1-3)                    |                                 | 1 (0-3)                            |                                         | 1 (0-3)              |                           | 1 (0-2)                      |                                   |
| 2014 | The former Yugoslav Republic of Macedonia | 4 (3-4)                   |                                | 3 (2-3)                           |                                        | 1 (1-3)                    |                                 | 1 (0-2)                            |                                         | 1 (0-2)              |                           | 1 (0-2)                      |                                   |
| 2015 | The former Yugoslav Republic of Macedonia | 3 (2-3)                   | 0 (0-0)                        | 3 (2-3)                           | 0 (0-0)                                | 3 (2-3)                    | 0 (0-0)                         | 1 (0-2)                            | 0 (0-0)                                 | 3 (2-3)              | 0 (0-0)                   | 1 (0-2)                      | 0 (0-0)                           |
| 2000 | Timor-Leste                               | 299 (212-312)             |                                | 175 (124-192)                     |                                        | 42 (17-89)                 |                                 | 25 (10-52)                         |                                         | 13 (5-28)            |                           | 8 (3-16)                     |                                   |
| 2001 | Timor-Leste                               | 278 (197-289)             |                                | 162 (115-168)                     |                                        | 41 (17-87)                 |                                 | 24 (10-50)                         |                                         | 13 (5-27)            |                           | 8 (3-16)                     |                                   |
| 2002 | Timor-Leste                               | 256 (181-267)             |                                | 149 (106-156)                     |                                        | 39 (16-82)                 |                                 | 23 (9-48)                          |                                         | 12 (5-26)            |                           | 7 (3-15)                     |                                   |
| 2003 | Timor-Leste                               | 235 (167-245)             |                                | 138 (98-144)                      |                                        | 36 (15-75)                 |                                 | 21 (9-44)                          |                                         | 11 (5-24)            |                           | 7 (3-14)                     |                                   |
| 2004 | Timor-Leste                               | 214 (152-223)             |                                | 128 (91-133)                      |                                        | 32 (14-67)                 |                                 | 19 (8-40)                          |                                         | 10 (4-21)            |                           | 6 (3-12)                     |                                   |
| 2005 | Timor-Leste                               | 193 (137-202)             |                                | 118 (84-123)                      |                                        | 28 (12-57)                 |                                 | 17 (7-34)                          |                                         | 9 (4-18)             |                           | 5 (2-11)                     |                                   |
| 2006 | Timor-Leste                               | 173 (123-180)             |                                | 110 (78-115)                      |                                        | 23 (10-47)                 |                                 | 15 (7-30)                          |                                         | 7 (3-15)             |                           | 5 (2-9)                      |                                   |
| 2007 | Timor-Leste                               | 154 (109-160)             |                                | 102 (72-106)                      |                                        | 20 (8-41)                  |                                 | 13 (5-27)                          |                                         | 17 (7-36)            |                           | 12 (5-24)                    |                                   |
| 2008 | Timor-Leste                               | 140 (99-145)              |                                | 95 (67-99)                        |                                        | 17 (7-35)                  |                                 | 11 (5-24)                          |                                         | 15 (6-31)            |                           | 10 (4-21)                    |                                   |
| 2009 | Timor-Leste                               | 130 (93-136)              |                                | 89 (63-93)                        |                                        | 15 (6-31)                  |                                 | 10 (4-21)                          |                                         | 14 (6-28)            |                           | 9 (4-19)                     |                                   |
| 2010 | Timor-Leste                               | 130 (93-136)              |                                | 87 (62-91)                        |                                        | 15 (6-31)                  |                                 | 10 (4-20)                          |                                         | 13 (6-27)            |                           | 9 (4-18)                     |                                   |
| 2011 | Timor-Leste                               | 134 (95-140)              |                                | 89 (63-93)                        |                                        | 15 (6-31)                  |                                 | 10 (4-20)                          |                                         | 14 (6-28)            |                           | 9 (4-18)                     |                                   |
| 2012 | Timor-Leste                               | 145 (103-151)             |                                | 90 (64-94)                        |                                        | 17 (7-34)                  |                                 | 10 (4-21)                          |                                         | 15 (6-30)            |                           | 9 (4-19)                     |                                   |
| 2013 | Timor-Leste                               | 157 (111-163)             |                                | 89 (63-93)                        |                                        | 18 (8-36)                  |                                 | 10 (4-21)                          |                                         | 16 (7-32)            |                           | 9 (4-18)                     |                                   |
| 2014 | Timor-Leste                               | 164 (116-171)             |                                | 86 (61-90)                        |                                        | 19 (8-38)                  |                                 | 10 (4-20)                          |                                         | 17 (7-34)            |                           | 9 (4-18)                     |                                   |
| 2015 | Timor-Leste                               | 165 (117-172)             | 1 (1-1)                        | 83 (59-86)                        | 1 (1-1)                                | 19 (8-39)                  | 0 (0-0)                         | 10 (4-19)                          | 0 (0-0)                                 | 17 (7-35)            | 0 (0-0)                   | 9 (4-17)                     | 0 (0-0)                           |
| 2000 | Togo                                      | 791 (561-824)             |                                | 98 (70-103)                       |                                        | 147 (52-333)               |                                 | 18 (7-41)                          |                                         | 46 (16-105)          |                           | 6 (2-13)                     |                                   |
| 2001 | Togo                                      | 803 (569-836)             |                                | 97 (69-101)                       |                                        | 151 (53-341)               |                                 | 18 (6-41)                          |                                         | 47 (17-107)          |                           | 6 (2-13)                     |                                   |
| 2002 | Togo                                      | 809 (574-843)             |                                | 95 (68-99)                        |                                        | 153 (53-346)               |                                 | 18 (6-41)                          |                                         | 48 (17-109)          |                           | 6 (2-13)                     |                                   |
| 2003 | Togo                                      | 808 (573-842)             |                                | 93 (66-97)                        |                                        | 153 (53-348)               |                                 | 18 (6-40)                          |                                         | 48 (17-110)          |                           | 6 (2-13)                     |                                   |
| 2004 | Togo                                      | 805 (571-839)             |                                | 90 (64-94)                        |                                        | 153 (52-350)               |                                 | 17 (6-39)                          |                                         | 48 (16-110)          |                           | 5 (2-12)                     |                                   |
| 2005 | Togo                                      | 797 (565-831)             |                                | 87 (61-90)                        |                                        | 152 (52-348)               |                                 | 17 (6-38)                          |                                         | 48 (16-109)          |                           | 5 (2-12)                     |                                   |
| 2006 | Togo                                      | 791 (561-824)             |                                | 83 (59-87)                        |                                        | 151 (51-346)               |                                 | 16 (5-35)                          |                                         | 47 (16-109)          |                           | 5 (2-11)                     |                                   |
| 2007 | Togo                                      | 792 (562-825)             |                                | 81 (57-84)                        |                                        | 151 (52-344)               |                                 | 15 (5-35)                          |                                         | 47 (16-108)          |                           | 5 (2-11)                     |                                   |
| 2008 | Togo                                      | 810 (574-844)             |                                | 81 (57-84)                        |                                        | 154 (54-349)               |                                 | 15 (5-35)                          |                                         | 48 (17-110)          |                           | 5 (2-11)                     |                                   |
| 2009 | Togo                                      | 843 (598-878)             |                                | 82 (58-86)                        |                                        | 160 (57-361)               |                                 | 16 (6-35)                          |                                         | 50 (18-114)          |                           | 5 (2-11)                     |                                   |
| 2010 | Togo                                      | 893 (633-930)             |                                | 85 (60-89)                        |                                        | 170 (61-390)               |                                 | 16 (6-36)                          |                                         | 54 (19-120)          |                           | 5 (2-11)                     |                                   |
| 2011 | Togo                                      | 962 (882-1003)            |                                | 90 (64-94)                        |                                        | 184 (68-405)               |                                 | 17 (6-38)                          |                                         | 58 (22-127)          |                           | 5 (2-12)                     |                                   |
| 2012 | Togo                                      | 1026 (727-1069)           |                                | 94 (67-98)                        |                                        | 197 (77-425)               |                                 | 18 (7-39)                          |                                         | 62 (24-134)          |                           | 6 (2-12)                     |                                   |
| 2013 | Togo                                      | 1059 (751-1103)           |                                | 96 (68-100)                       |                                        | 203 (83-432)               |                                 | 18 (8-39)                          |                                         | 64 (26-136)          |                           | 6 (2-12)                     |                                   |
| 2014 | Togo                                      | 950 (674-990)             |                                | 85 (60-88)                        |                                        | 179 (73-379)               |                                 | 16 (6-34)                          |                                         | 56 (23-119)          |                           | 5 (2-11)                     |                                   |
| 2015 | Togo                                      | 699 (495-728)             | 39 (27-40)                     | 81 (43-84)                        | 3 (2-4)                                | 126 (51-265)               | 7 (3-15)                        | 11 (5-23)                          | 1 (0-1)                                 | 40 (16-83)           | 2 (1-5)                   | 3 (1-7)                      | 0 (0-0)                           |
| 2000 | Tonga                                     | 2 (1-2)                   |                                | 12 (9-13)                         |                                        | 0 (0-0)                    |                                 | 2 (1-3)                            |                                         | 0 (0-0)              |                           | 1 (1-3)                      |                                   |
| 2001 | Tonga                                     | 2 (1-2)                   |                                | 12 (9-13)                         |                                        | 0 (0-0)                    |                                 | 2 (1-3)                            |                                         | 0 (0-0)              |                           | 1 (1-3)                      |                                   |
| 2002 | Tonga                                     | 2 (1-2)                   |                                | 12 (9-13)                         |                                        | 0 (0-0)                    |                                 | 2 (1-3)                            |                                         | 0 (0-0)              |                           | 1 (1-2)                      |                                   |
| 2003 | Tonga                                     | 2 (1-2)                   |                                | 12 (8-12)                         |                                        | 0 (0-0)                    |                                 | 2 (1-3)                            |                                         | 0 (0-0)              |                           | 1 (1-2)                      |                                   |
| 2004 | Tonga                                     | 2 (1-2)                   |                                | 12 (8-12)                         |                                        | 0 (0-0)                    |                                 | 2 (1-3)                            |                                         | 0 (0-0)              |                           | 1 (1-2)                      |                                   |
| 2005 | Tonga                                     | 2 (1-2)                   |                                | 13 (9-13)                         |                                        | 0 (0-1)                    |                                 | 3 (1-5)                            |                                         | 0 (0-1)              |                           | 3 (1-5)                      |                                   |
| 2006 | Tonga                                     | 2 (1-2)                   |                                | 13 (9-14)                         |                                        | 0 (0-1)                    |                                 | 3 (1-6)                            |                                         | 0 (0-1)              |                           | 3 (1-5)                      |                                   |
| 2007 | Tonga                                     | 2 (1-2)                   |                                | 13 (9-14)                         |                                        | 0 (0-1)                    |                                 | 3 (1-6)                            |                                         | 0 (0-1)              |                           | 3 (1-5)                      |                                   |
| 2008 | Tonga                                     | 2 (1-2)                   |                                | 13 (9-14)                         |                                        | 0 (0-1)                    |                                 | 3 (1-6)                            |                                         | 0 (0-1)              |                           | 3 (1-5)                      |                                   |
| 2009 | Tonga                                     | 2 (1-2)                   |                                | 14 (10-14)                        |                                        | 0 (0-1)                    |                                 | 3 (1-6)                            |                                         | 0 (0-1)              |                           | 3 (1-5)                      |                                   |
| 2010 | Tonga                                     | 2 (1-2)                   |                                | 14 (10-15)                        |                                        | 0 (0-1)                    |                                 | 4 (2-6)                            |                                         | 0 (0-1)              |                           | 3 (1-6)                      |                                   |
| 2011 | Tonga                                     | 2 (1-2)                   |                                | 14 (10-15)                        |                                        | 0 (0-1)                    |                                 | 3 (2-6)                            |                                         | 0 (0-1)              |                           | 3 (1-5)                      |                                   |
| 2012 | Tonga                                     | 2 (1-2)                   |                                | 13 (9-14)                         |                                        | 0 (0-1)                    |                                 | 3 (1-6)                            |                                         | 0 (0-1)              |                           | 3 (1-5)                      |                                   |
| 2013 | Tonga                                     | 2 (1-2)                   |                                | 13 (9-14)                         |                                        | 0 (0-1)                    |                                 | 3 (1-6)                            |                                         | 0 (0-1)              |                           | 3 (1-5)                      |                                   |
| 2014 | Tonga                                     | 2 (1-2)                   |                                | 13 (9-14)                         |                                        | 0 (0-1)                    |                                 | 3 (1-5)                            |                                         | 0 (0-1)              |                           | 3 (1-5)                      |                                   |
| 2015 | Tonga                                     | 2 (1-2)                   | 0 (0-0)                        | 13 (9-14)                         | 0 (0-0)                                | 0 (0-1)                    | 0 (0-0)                         | 3 (1-5)                            | 0 (0-0)                                 | 0 (0-1)              | 0 (0-0)                   | 3 (1-5)                      | 0 (0-0)                           |
| 2000 | Trinidad and Tobago                       | 4 (3-4)                   |                                | 6 (4-6)                           |                                        | 3 (1-8)                    |                                 | 3 (1-9)                            |                                         | 2 (1-7)              |                           | 3 (1-8)                      |                                   |
| 2001 | Trinidad and Tobago                       | 5 (4-5)                   |                                | 6 (4-6)                           |                                        | 1 (0-3)                    |                                 | 1 (0-3)                            |                                         | 1 (0-3)              |                           | 1 (0-3)                      |                                   |
| 2002 | Trinidad and Tobago                       | 7 (5-7)                   |                                | 7 (5-8)                           |                                        | 2 (0-5)                    |                                 | 2 (0-5)                            |                                         | 1 (0-4)              |                           | 2 (0-5)                      |                                   |
| 2003 | Trinidad and Tobago                       | 14 (10-14)                |                                | 15 (11-16)                        |                                        | 4 (1-11)                   |                                 | 4 (1-12)                           |                                         | 3 (1-10)             |                           | 4 (1-11)                     |                                   |
| 2004 | Trinidad and Tobago                       | 11 (8-11)                 |                                | 12 (9-13)                         |                                        | 1 (0-3)                    |                                 | 1 (0-3)                            |                                         | 1 (0-3)              |                           | 1 (0-3)                      |                                   |
| 2005 | Trinidad and Tobago                       | 10 (7-10)                 |                                | 11 (8-11)                         |                                        | 2 (0-5)                    |                                 | 2 (1-5)                            |                                         | 2 (0-4)              |                           | 2 (0-5)                      |                                   |
| 2006 | Trinidad and Tobago                       | 7 (5-7)                   |                                | 7 (5-8)                           |                                        | 2 (1-6)                    |                                 | 2 (1-6)                            |                                         | 2 (0-5)              |                           | 2 (1-5)                      |                                   |
| 2007 | Trinidad and Tobago                       | 10 (7-10)                 |                                | 11 (8-11)                         |                                        | 1 (0-3)                    |                                 | 1 (0-4)                            |                                         | 1 (0-3)              |                           | 1 (0-3)                      |                                   |
| 2008 | Trinidad and Tobago                       | 6 (4-6)                   |                                | 6 (4-7)                           |                                        | 2 (0-5)                    |                                 | 2 (1-6)                            |                                         | 2 (0-5)              |                           | 2 (0-5)                      |                                   |
| 2009 | Trinidad and Tobago                       | 6 (5-7)                   |                                | 7 (5-7)                           |                                        | 1 (0-4)                    |                                 | 2 (0-4)                            |                                         | 1 (0-4)              |                           | 2 (0-4)                      |                                   |
| 2010 | Trinidad and Tobago                       | 7 (5-7)                   |                                | 7 (5-7)                           |                                        | 1 (0-4)                    |                                 | 1 (0-4)                            |                                         | 1 (0-4)              |                           | 1 (0-4)                      |                                   |
| 2011 | Trinidad and Tobago                       | 7 (5-7)                   |                                | 7 (5-7)                           |                                        | 1 (0-4)                    |                                 | 1 (0-4)                            |                                         | 1 (0-3)              |                           | 1 (0-4)                      |                                   |
| 2012 | Trinidad and Tobago                       | 6 (4-6)                   |                                | 6 (4-6)                           |                                        | 1 (0-3)                    |                                 | 1 (0-3)                            |                                         | 1 (0-3)              |                           | 1 (0-3)                      |                                   |
| 2013 | Trinidad and Tobago                       | 5 (3-5)                   |                                | 5 (3-5)                           |                                        | 1 (0-2)                    |                                 | 1 (0-3)                            |                                         | 1 (0-2)              |                           | 1 (0-2)                      |                                   |
| 2014 | Trinidad and Tobago                       | 4 (3-4)                   |                                | 4 (3-4)                           |                                        | 1 (0-2)                    |                                 | 1 (0-2)                            |                                         | 1 (0-2)              |                           | 1 (0-2)                      |                                   |

Spn = *Streptococcus pneumoniae*; npnm = non-pneumonia, non-meningitis; HIV = deaths only in HIV-infected children; Uncertainty range provided in parentheses.

| Year | Country             | Spn pneumonia deaths (UR) | Spn pneumonia deaths, HIV (UR) | Spn pneumonia mortality rate (UR) | Spn pneumonia mortality rate, HIV (UR) | Spn meningitis deaths (UR) | Spn meningitis deaths, HIV (UR) | Spn meningitis mortality rate (UR) | Spn meningitis mortality rate, HIV (UR) | Spn NPNM deaths (UR) | Spn NPNM deaths, HIV (UR) | Spn NPNM mortality rate (UR) | Spn NPNM mortality rate, HIV (UR) |
|------|---------------------|---------------------------|--------------------------------|-----------------------------------|----------------------------------------|----------------------------|---------------------------------|------------------------------------|-----------------------------------------|----------------------|---------------------------|------------------------------|-----------------------------------|
| 2015 | Trinidad and Tobago | 3 (2-3)                   | 0 (0-0)                        | 3 (2-4)                           | 0 (0-0)                                | 1 (0-2)                    | 0 (0-0)                         | 1 (0-2)                            | 0 (0-0)                                 | 1 (0-2)              | 0 (0-0)                   | 1 (0-2)                      | 0 (0-0)                           |
| 2000 | Tunisia             | 205 (146-214)             |                                | 25 (18-26)                        |                                        | 11 (4-25)                  |                                 | 1 (0-3)                            |                                         | 10 (3-22)            |                           | 1 (0-3)                      |                                   |
| 2001 | Tunisia             | 182 (129-190)             |                                | 22 (16-23)                        |                                        | 10 (2-26)                  |                                 | 1 (0-3)                            |                                         | 9 (2-23)             |                           | 1 (0-3)                      |                                   |
| 2002 | Tunisia             | 163 (116-170)             |                                | 20 (14-21)                        |                                        | 9 (2-24)                   |                                 | 1 (0-3)                            |                                         | 8 (2-21)             |                           | 1 (0-3)                      |                                   |
| 2003 | Tunisia             | 159 (113-166)             |                                | 20 (14-21)                        |                                        | 16 (4-40)                  |                                 | 2 (0-5)                            |                                         | 14 (3-36)            |                           | 2 (0-5)                      |                                   |
| 2004 | Tunisia             | 146 (104-152)             |                                | 19 (13-19)                        |                                        | 15 (4-38)                  |                                 | 2 (0-5)                            |                                         | 13 (3-34)            |                           | 2 (0-4)                      |                                   |
| 2005 | Tunisia             | 134 (95-139)              |                                | 17 (12-18)                        |                                        | 14 (4-34)                  |                                 | 2 (0-4)                            |                                         | 12 (3-31)            |                           | 2 (0-4)                      |                                   |
| 2006 | Tunisia             | 110 (78-115)              |                                | 14 (10-15)                        |                                        | 6 (2-16)                   |                                 | 1 (0-2)                            |                                         | 6 (2-14)             |                           | 1 (0-2)                      |                                   |
| 2007 | Tunisia             | 102 (72-106)              |                                | 13 (9-13)                         |                                        | 6 (2-15)                   |                                 | 1 (0-2)                            |                                         | 5 (1-13)             |                           | 1 (0-2)                      |                                   |
| 2008 | Tunisia             | 94 (67-98)                |                                | 12 (8-12)                         |                                        | 6 (2-14)                   |                                 | 1 (0-2)                            |                                         | 5 (1-12)             |                           | 1 (0-2)                      |                                   |
| 2009 | Tunisia             | 89 (63-92)                |                                | 11 (8-11)                         |                                        | 5 (1-13)                   |                                 | 1 (0-2)                            |                                         | 5 (1-12)             |                           | 1 (0-1)                      |                                   |
| 2010 | Tunisia             | 83 (59-87)                |                                | 10 (7-10)                         |                                        | 5 (1-12)                   |                                 | 1 (0-1)                            |                                         | 4 (1-11)             |                           | 1 (0-1)                      |                                   |
| 2011 | Tunisia             | 80 (57-84)                |                                | 9 (7-10)                          |                                        | 7 (2-17)                   |                                 | 1 (0-2)                            |                                         | 6 (2-15)             |                           | 1 (0-2)                      |                                   |
| 2012 | Tunisia             | 83 (59-87)                |                                | 9 (7-10)                          |                                        | 9 (2-22)                   |                                 | 1 (0-2)                            |                                         | 8 (2-19)             |                           | 1 (0-2)                      |                                   |
| 2013 | Tunisia             | 81 (57-84)                |                                | 9 (6-9)                           |                                        | 8 (2-21)                   |                                 | 1 (0-2)                            |                                         | 7 (2-18)             |                           | 1 (0-2)                      |                                   |
| 2014 | Tunisia             | 77 (54-80)                |                                | 8 (6-8)                           |                                        | 8 (2-19)                   |                                 | 1 (0-2)                            |                                         | 7 (2-17)             |                           | 1 (0-2)                      |                                   |
| 2015 | Tunisia             | 72 (51-75)                | 0 (0-0)                        | 7 (5-8)                           | 0 (0-0)                                | 7 (2-18)                   | 0 (0-0)                         | 1 (0-2)                            | 0 (0-0)                                 | 6 (2-16)             | 0 (0-0)                   | 1 (0-2)                      | 0 (0-0)                           |
| 2000 | Turkey              | 1345 (954-1402)           |                                | 21 (15-21)                        |                                        | 147 (70-226)               |                                 | 2 (1-3)                            |                                         | 131 (62-201)         |                           | 2 (1-3)                      |                                   |
| 2001 | Turkey              | 1189 (843-1238)           |                                | 18 (13-19)                        |                                        | 135 (63-206)               |                                 | 2 (1-3)                            |                                         | 120 (56-183)         |                           | 2 (1-3)                      |                                   |
| 2002 | Turkey              | 1039 (736-1082)           |                                | 16 (11-16)                        |                                        | 124 (57-185)               |                                 | 2 (1-3)                            |                                         | 105 (51-165)         |                           | 2 (1-3)                      |                                   |
| 2003 | Turkey              | 913 (647-951)             |                                | 14 (10-15)                        |                                        | 115 (52-168)               |                                 | 2 (1-3)                            |                                         | 103 (46-149)         |                           | 2 (1-2)                      |                                   |
| 2004 | Turkey              | 802 (569-836)             |                                | 12 (9-13)                         |                                        | 110 (76-174)               |                                 | 2 (1-3)                            |                                         | 98 (67-155)          |                           | 2 (1-2)                      |                                   |
| 2005 | Turkey              | 714 (506-744)             |                                | 11 (8-12)                         |                                        | 107 (69-159)               |                                 | 2 (1-2)                            |                                         | 95 (62-142)          |                           | 1 (1-2)                      |                                   |
| 2006 | Turkey              | 628 (446-655)             |                                | 10 (7-10)                         |                                        | 102 (63-144)               |                                 | 2 (1-2)                            |                                         | 90 (56-128)          |                           | 1 (1-2)                      |                                   |
| 2007 | Turkey              | 668 (474-697)             |                                | 11 (8-11)                         |                                        | 122 (73-168)               |                                 | 2 (1-3)                            |                                         | 108 (65-150)         |                           | 2 (1-2)                      |                                   |
| 2008 | Turkey              | 620 (440-646)             |                                | 10 (7-10)                         |                                        | 118 (71-162)               |                                 | 2 (1-3)                            |                                         | 105 (63-145)         |                           | 2 (1-2)                      |                                   |
| 2009 | Turkey              | 483 (343-504)             |                                | 8 (5-8)                           |                                        | 95 (57-131)                |                                 | 2 (1-2)                            |                                         | 85 (51-117)          |                           | 1 (1-2)                      |                                   |
| 2010 | Turkey              | 299 (212-312)             |                                | 5 (3-5)                           |                                        | 81 (49-112)                |                                 | 1 (1-2)                            |                                         | 72 (43-99)           |                           | 1 (1-2)                      |                                   |
| 2011 | Turkey              | 193 (137-201)             |                                | 3 (2-3)                           |                                        | 53 (32-72)                 |                                 | 1 (0-1)                            |                                         | 47 (28-65)           |                           | 1 (0-1)                      |                                   |
| 2012 | Turkey              | 135 (95-140)              |                                | 2 (1-2)                           |                                        | 57 (34-79)                 |                                 | 1 (1-1)                            |                                         | 51 (31-71)           |                           | 1 (0-1)                      |                                   |
| 2013 | Turkey              | 183 (129-190)             |                                | 3 (2-3)                           |                                        | 46 (28-64)                 |                                 | 1 (0-1)                            |                                         | 41 (25-57)           |                           | 1 (0-1)                      |                                   |
| 2014 | Turkey              | 147 (105-154)             |                                | 2 (2-2)                           |                                        | 46 (28-64)                 |                                 | 1 (0-1)                            |                                         | 41 (25-57)           |                           | 1 (0-1)                      |                                   |
| 2015 | Turkey              | 139 (98-144)              | 0 (0-0)                        | 2 (1-2)                           | 0 (0-0)                                | 43 (26-60)                 | 0 (0-0)                         | 1 (0-1)                            | 0 (0-0)                                 | 39 (23-53)           | 0 (0-0)                   | 1 (0-1)                      | 0 (0-0)                           |
| 2000 | Turkmenistan        | 497 (353-518)             |                                | 103 (73-108)                      |                                        | 62 (24-135)                |                                 | 13 (5-28)                          |                                         | 20 (8-42)            |                           | 4 (2-9)                      |                                   |
| 2001 | Turkmenistan        | 482 (342-503)             |                                | 104 (74-109)                      |                                        | 60 (23-129)                |                                 | 13 (5-28)                          |                                         | 19 (7-41)            |                           | 4 (2-9)                      |                                   |
| 2002 | Turkmenistan        | 488 (346-509)             |                                | 106 (75-110)                      |                                        | 60 (24-129)                |                                 | 13 (5-28)                          |                                         | 19 (7-41)            |                           | 4 (2-9)                      |                                   |
| 2003 | Turkmenistan        | 504 (358-525)             |                                | 106 (75-111)                      |                                        | 61 (20-136)                |                                 | 13 (4-29)                          |                                         | 54 (18-121)          |                           | 11 (4-26)                    |                                   |
| 2004 | Turkmenistan        | 514 (364-535)             |                                | 105 (75-110)                      |                                        | 61 (21-137)                |                                 | 13 (4-29)                          |                                         | 55 (18-122)          |                           | 11 (4-25)                    |                                   |
| 2005 | Turkmenistan        | 508 (360-530)             |                                | 102 (73-107)                      |                                        | 59 (20-132)                |                                 | 12 (4-27)                          |                                         | 53 (18-118)          |                           | 11 (4-24)                    |                                   |
| 2006 | Turkmenistan        | 493 (350-514)             |                                | 96 (68-100)                       |                                        | 56 (19-125)                |                                 | 11 (4-24)                          |                                         | 50 (17-111)          |                           | 10 (3-22)                    |                                   |
| 2007 | Turkmenistan        | 466 (331-486)             |                                | 90 (64-94)                        |                                        | 52 (18-115)                |                                 | 10 (3-22)                          |                                         | 46 (16-103)          |                           | 9 (3-20)                     |                                   |
| 2008 | Turkmenistan        | 431 (305-449)             |                                | 85 (60-88)                        |                                        | 47 (16-104)                |                                 | 9 (3-20)                           |                                         | 42 (14-92)           |                           | 8 (3-18)                     |                                   |
| 2009 | Turkmenistan        | 398 (282-414)             |                                | 80 (56-83)                        |                                        | 42 (15-93)                 |                                 | 8 (3-19)                           |                                         | 38 (13-83)           |                           | 8 (3-17)                     |                                   |
| 2010 | Turkmenistan        | 378 (268-394)             |                                | 76 (54-79)                        |                                        | 39 (14-86)                 |                                 | 8 (3-17)                           |                                         | 35 (12-77)           |                           | 7 (2-15)                     |                                   |
| 2011 | Turkmenistan        | 363 (258-379)             |                                | 74 (52-77)                        |                                        | 37 (13-81)                 |                                 | 7 (3-16)                           |                                         | 33 (12-72)           |                           | 7 (2-15)                     |                                   |
| 2012 | Turkmenistan        | 358 (254-373)             |                                | 72 (51-75)                        |                                        | 35 (13-78)                 |                                 | 7 (3-16)                           |                                         | 31 (11-69)           |                           | 6 (2-14)                     |                                   |
| 2013 | Turkmenistan        | 356 (253-371)             |                                | 71 (50-74)                        |                                        | 35 (12-76)                 |                                 | 7 (2-15)                           |                                         | 31 (11-67)           |                           | 6 (2-13)                     |                                   |
| 2014 | Turkmenistan        | 354 (251-369)             |                                | 69 (49-72)                        |                                        | 34 (12-74)                 |                                 | 7 (2-14)                           |                                         | 30 (11-66)           |                           | 6 (2-13)                     |                                   |
| 2015 | Turkmenistan        | 347 (246-362)             | 0 (0-0)                        | 67 (47-70)                        | 0 (0-0)                                | 33 (12-72)                 | 0 (0-0)                         | 6 (2-14)                           | 0 (0-0)                                 | 29 (11-64)           | 0 (0-0)                   | 6 (2-12)                     | 0 (0-0)                           |
| 2000 | Tuvalu              | 1 (0-1)                   |                                | 39 (28-41)                        |                                        | 0 (0-0)                    |                                 | 2 (1-5)                            |                                         | 0 (0-0)              |                           | 2 (1-4)                      |                                   |
| 2001 | Tuvalu              | 0 (0-0)                   |                                | 32 (23-34)                        |                                        | 0 (0-0)                    |                                 | 2 (1-4)                            |                                         | 0 (0-0)              |                           | 2 (1-3)                      |                                   |
| 2002 | Tuvalu              | 0 (0-0)                   |                                | 33 (24-35)                        |                                        | 0 (0-0)                    |                                 | 2 (1-4)                            |                                         | 0 (0-0)              |                           | 2 (1-4)                      |                                   |
| 2003 | Tuvalu              | 0 (0-0)                   |                                | 35 (25-37)                        |                                        | 0 (0-0)                    |                                 | 2 (1-4)                            |                                         | 0 (0-0)              |                           | 2 (1-4)                      |                                   |
| 2004 | Tuvalu              | 0 (0-0)                   |                                | 28 (20-30)                        |                                        | 0 (0-0)                    |                                 | 2 (1-3)                            |                                         | 0 (0-0)              |                           | 1 (1-3)                      |                                   |
| 2005 | Tuvalu              | 0 (0-0)                   |                                | 30 (21-31)                        |                                        | 0 (0-0)                    |                                 | 2 (1-3)                            |                                         | 0 (0-0)              |                           | 2 (1-3)                      |                                   |
| 2006 | Tuvalu              | 0 (0-0)                   |                                | 31 (22-32)                        |                                        | 0 (0-0)                    |                                 | 2 (1-4)                            |                                         | 0 (0-0)              |                           | 2 (1-3)                      |                                   |
| 2007 | Tuvalu              | 0 (0-0)                   |                                | 21 (15-21)                        |                                        | 0 (0-0)                    |                                 | 1 (0-2)                            |                                         | 0 (0-0)              |                           | 1 (0-2)                      |                                   |
| 2008 | Tuvalu              | 0 (0-0)                   |                                | 20 (14-21)                        |                                        | 0 (0-0)                    |                                 | 1 (0-2)                            |                                         | 0 (0-0)              |                           | 1 (0-2)                      |                                   |
| 2009 | Tuvalu              | 0 (0-0)                   |                                | 34 (24-35)                        |                                        | 0 (0-0)                    |                                 | 4 (1-8)                            |                                         | 0 (0-0)              |                           | 4 (1-8)                      |                                   |
| 2010 | Tuvalu              | 0 (0-0)                   |                                | 23 (16-24)                        |                                        | 0 (0-0)                    |                                 | 3 (1-6)                            |                                         | 0 (0-0)              |                           | 3 (1-5)                      |                                   |
| 2011 | Tuvalu              | 0 (0-0)                   |                                | 22 (16-23)                        |                                        | 0 (0-0)                    |                                 | 3 (1-6)                            |                                         | 0 (0-0)              |                           | 3 (1-5)                      |                                   |
| 2012 | Tuvalu              | 0 (0-0)                   |                                | 22 (16-23)                        |                                        | 0 (0-0)                    |                                 | 3 (2-7)                            |                                         | 0 (0-0)              |                           | 3 (2-7)                      |                                   |
| 2013 | Tuvalu              | 0 (0-0)                   |                                | 22 (15-23)                        |                                        | 0 (0-0)                    |                                 | 3 (2-7)                            |                                         | 0 (0-0)              |                           | 3 (1-6)                      |                                   |
| 2014 | Tuvalu              | 0 (0-0)                   |                                | 22 (15-22)                        |                                        | 0 (0-0)                    |                                 | 3 (2-7)                            |                                         | 0 (0-0)              |                           | 3 (1-6)                      |                                   |
| 2015 | Tuvalu              | 0 (0-0)                   | 0 (0-0)                        | 21 (15-22)                        | 0 (0-0)                                | 0 (0-0)                    | 0 (0-0)                         | 3 (2-6)                            | 0 (0-0)                                 | 0 (0-0)              | 0 (0-0)                   | 3 (1-5)                      | 0 (0-0)                           |
| 2000 | Uganda              | 6651 (4716-6931)          |                                | 143 (101-149)                     |                                        | 1443 (685-2775)            |                                 | 31 (15-60)                         |                                         | 454 (215-873)        |                           | 10 (5-19)                    |                                   |
| 2001 | Uganda              | 6527 (4628-6802)          |                                | 136 (96-142)                      |                                        | 1411 (669-2710)            |                                 | 29 (14-56)                         |                                         | 444 (210-852)        |                           | 9 (4-18)                     |                                   |
| 2002 | Uganda              | 6439 (4566-6710)          |                                | 130 (92-135)                      |                                        | 1386 (665-2648)            |                                 | 28 (13-53)                         |                                         | 436 (209-832)        |                           | 9 (4-17)                     |                                   |
| 2003 | Uganda              | 6252 (4433-6516)          |                                | 122 (86-127)                      |                                        | 1340 (611-2543)            |                                 | 26 (13-50)                         |                                         | 421 (205-799)        |                           | 8 (4-16)                     |                                   |
| 2004 | Uganda              | 6410 (4545-6680)          |                                | 121 (86-126)                      |                                        | 1366 (672-2575)            |                                 | 26 (13-49)                         |                                         | 430 (211-810)        |                           | 8 (4-15)                     |                                   |
| 2005 | Uganda              | 6391 (4532-6660)          |                                | 117 (83-121)                      |                                        | 1354 (673-2532)            |                                 | 25 (12-46)                         |                                         | 428 (212-786)        |                           | 8 (3-15)                     |                                   |
| 2006 | Uganda              | 6086 (4315-6342)          |                                | 107 (76-112)                      |                                        | 1280 (644-2375)            |                                 | 23 (11-42)                         |                                         | 403 (202-747)        |                           | 7 (4-13)                     |                                   |
| 2007 | Uganda              | 5859 (4155-6106)          |                                | 100 (71-104)                      |                                        | 1223 (621-2250)            |                                 | 21 (11-38)                         |                                         | 384 (195-707)        |                           | 7 (3-12)                     |                                   |
| 2008 | Uganda              | 5743 (4072-5985)          |                                | 96 (68-100)                       |                                        | 1188 (611-2170)            |                                 | 20 (10-36)                         |                                         | 373 (192-682)        |                           | 6 (3-11)                     |                                   |
| 2009 | Uganda              | 5521 (3915-5754)          |                                | 89 (63-93)                        |                                        | 1134 (590-2058)            |                                 | 18 (10-33)                         |                                         | 356 (186-647)        |                           | 6 (3-10)                     |                                   |
| 2010 | Uganda              | 5441 (3858-5670)          |                                | 86 (61-89)                        |                                        | 1109 (586-2004)            |                                 | 18 (9-32)                          |                                         | 349 (184-630)        |                           | 6 (3-10)                     |                                   |
| 2011 | Uganda              | 5401 (3830-5629)          |                                | 83 (59-87)                        |                                        | 1095 (534-2020)            |                                 | 17 (8-31)                          |                                         | 375 (194-708)        |                           | 6 (3-10)                     |                                   |
| 2012 | Uganda              | 5371 (3809-5598)          |                                | 81 (57-84)                        |                                        | 1085 (539-1994)            |                                 | 16 (8-30)                          |                                         | 366 (180-707)        |                           | 6 (3-10)                     |                                   |
| 2013 | Uganda              | 5268 (3736-5490)          |                                | 77 (55-80)                        |                                        | 1061 (533-1943)            |                                 | 16 (8-28)                          |                                         | 345 (175-675)        |                           | 6 (3-10)                     |                                   |
| 2014 | Uganda              | 4256 (3018-4436)          |                                | 61 (43-63)                        |                                        | 833 (423-1520)             |                                 | 12 (6-22)                          |                                         | 271 (136-533)        |                           | 5 (3-10)                     |                                   |
| 2015 | Uganda              | 3826 (2571-3779)          | 757 (537-789)                  | 51 (36-53)                        | 11 (8-11)                              | 701 (358-1276)             | 146 (75-267)                    | 10 (5-18)                          | 2 (1-4)                                 | 624 (319-1136)       | 130 (67-237)              | 6 (3-10)                     | 2 (1-3)                           |
| 2000 | Ukraine             | 235 (167-245)             |                                | 11 (8-12)                         |                                        | 22 (9-62)                  |                                 | 1 (0-3)                            |                                         | 19 (8-55)            |                           | 1 (0-3)                      |                                   |
| 2001 | Ukraine             | 207 (147-216)             |                                | 10 (7-11)                         |                                        | 19 (8-55)                  |                                 | 1 (0-3)                            |                                         | 17 (7-49)            |                           | 1 (0-2)                      |                                   |
| 2002 | Ukraine             | 180 (128-187)             |                                | 9 (6-10)                          |                                        | 17 (7-48)                  |                                 | 1 (0-2)                            |                                         | 15 (5-42)            |                           | 1 (0-2)                      |                                   |
| 2003 | Ukraine             | 160 (114-167)             |                                | 8 (6-9)                           |                                        | 15 (6-43)                  |                                 | 1 (0-2)                            |                                         | 14 (5-38)            |                           | 1 (0-2)                      |                                   |
| 2004 | Ukraine             | 144 (102-150)             |                                | 7 (5-8)                           |                                        | 14 (6-39)                  |                                 | 1 (0-2)                            |                                         | 12 (5-35)            |                           | 1 (0-2)                      |                                   |
| 2005 | Ukraine             | 136 (97-142)              |                                | 7 (5-7)                           |                                        | 13 (5-37)                  |                                 | 1 (0-2)                            |                                         | 12 (5-33)            |                           | 1 (0-2)                      |                                   |
| 2006 | Ukraine             | 131 (                     |                                |                                   |                                        |                            |                                 |                                    |                                         |                      |                           |                              |                                   |

| Year | Country                     | Spn pneumonia deaths (UR) | Spn pneumonia deaths, HIV (UR) | Spn pneumonia mortality rate (UR) | Spn pneumonia mortality rate, HIV (UR) | Spn meningitis deaths (UR) | Spn meningitis deaths, HIV (UR) | Spn meningitis mortality rate (UR) | Spn meningitis mortality rate, HIV (UR) | Spn NPNM deaths (UR) | Spn NPNM deaths, HIV (UR) | Spn NPNM mortality rate (UR) | Spn NPNM mortality rate, HIV (UR) |
|------|-----------------------------|---------------------------|--------------------------------|-----------------------------------|----------------------------------------|----------------------------|---------------------------------|------------------------------------|-----------------------------------------|----------------------|---------------------------|------------------------------|-----------------------------------|
| 2007 | Ukraine                     | 153 (108-159)             |                                | 7 (5-8)                           |                                        | 22 (9-60)                  |                                 | 1 (0-3)                            |                                         | 19 (8-54)            |                           | 1 (0-3)                      |                                   |
| 2008 | Ukraine                     | 160 (114-167)             |                                | 7 (5-8)                           |                                        | 24 (10-66)                 |                                 | 1 (0-3)                            |                                         | 21 (9-59)            |                           | 1 (0-3)                      |                                   |
| 2009 | Ukraine                     | 152 (108-158)             |                                | 7 (5-7)                           |                                        | 22 (9-60)                  |                                 | 1 (0-3)                            |                                         | 20 (8-54)            |                           | 1 (0-2)                      |                                   |
| 2010 | Ukraine                     | 147 (104-153)             |                                | 6 (4-7)                           |                                        | 21 (9-56)                  |                                 | 1 (0-2)                            |                                         | 19 (8-50)            |                           | 1 (0-2)                      |                                   |
| 2011 | Ukraine                     | 129 (91-134)              |                                | 5 (4-5)                           |                                        | 16 (7-44)                  |                                 | 1 (0-2)                            |                                         | 15 (6-39)            |                           | 1 (0-2)                      |                                   |
| 2012 | Ukraine                     | 129 (92-135)              |                                | 5 (4-5)                           |                                        | 19 (8-51)                  |                                 | 1 (0-2)                            |                                         | 17 (7-45)            |                           | 1 (0-2)                      |                                   |
| 2013 | Ukraine                     | 113 (80-118)              |                                | 5 (3-5)                           |                                        | 16 (7-44)                  |                                 | 1 (0-2)                            |                                         | 15 (6-39)            |                           | 1 (0-2)                      |                                   |
| 2014 | Ukraine                     | 98 (69-102)               |                                | 4 (3-4)                           |                                        | 14 (6-36)                  |                                 | 1 (0-1)                            |                                         | 12 (5-32)            |                           | 0 (0-1)                      |                                   |
| 2015 | Ukraine                     | 85 (60-89)                | 3 (2-3)                        | 4 (2-4)                           | 0 (0-0)                                | 12 (5-31)                  | 0 (0-1)                         | 0 (0-1)                            | 0 (0-0)                                 | 10 (4-27)            | 0 (0-1)                   | 0 (0-1)                      | 0 (0-0)                           |
| 2000 | United Arab Emirates        | 12 (9-13)                 |                                | 5 (3-5)                           |                                        | 3 (2-4)                    |                                 | 1 (1-2)                            |                                         | 2 (1-1)              |                           | 1 (1-1)                      |                                   |
| 2001 | United Arab Emirates        | 12 (8-12)                 |                                | 5 (3-5)                           |                                        | 3 (2-4)                    |                                 | 1 (1-2)                            |                                         | 2 (1-3)              |                           | 1 (1-1)                      |                                   |
| 2002 | United Arab Emirates        | 11 (8-11)                 |                                | 4 (3-5)                           |                                        | 3 (2-4)                    |                                 | 1 (1-1)                            |                                         | 2 (1-3)              |                           | 1 (1-1)                      |                                   |
| 2003 | United Arab Emirates        | 10 (7-11)                 |                                | 4 (3-4)                           |                                        | 2 (1-3)                    |                                 | 1 (1-1)                            |                                         | 2 (1-3)              |                           | 1 (1-1)                      |                                   |
| 2004 | United Arab Emirates        | 11 (7-11)                 |                                | 4 (3-4)                           |                                        | 3 (2-4)                    |                                 | 1 (1-1)                            |                                         | 2 (1-3)              |                           | 1 (1-1)                      |                                   |
| 2005 | United Arab Emirates        | 11 (8-11)                 |                                | 4 (3-4)                           |                                        | 3 (2-4)                    |                                 | 1 (1-1)                            |                                         | 2 (1-3)              |                           | 1 (1-1)                      |                                   |
| 2006 | United Arab Emirates        | 11 (8-12)                 |                                | 4 (3-4)                           |                                        | 3 (2-4)                    |                                 | 1 (1-1)                            |                                         | 2 (1-3)              |                           | 1 (0-1)                      |                                   |
| 2007 | United Arab Emirates        | 12 (9-13)                 |                                | 4 (3-4)                           |                                        | 3 (2-4)                    |                                 | 1 (1-1)                            |                                         | 3 (2-4)              |                           | 1 (0-1)                      |                                   |
| 2008 | United Arab Emirates        | 13 (9-14)                 |                                | 4 (3-4)                           |                                        | 3 (2-4)                    |                                 | 1 (0-1)                            |                                         | 3 (2-4)              |                           | 1 (0-1)                      |                                   |
| 2009 | United Arab Emirates        | 13 (10-14)                |                                | 3 (2-4)                           |                                        | 3 (2-4)                    |                                 | 1 (0-1)                            |                                         | 3 (2-4)              |                           | 1 (0-1)                      |                                   |
| 2010 | United Arab Emirates        | 10 (7-11)                 |                                | 2 (2-3)                           |                                        | 2 (1-3)                    |                                 | 1 (0-1)                            |                                         | 2 (1-3)              |                           | 0 (0-1)                      |                                   |
| 2011 | United Arab Emirates        | 8 (6-9)                   |                                | 2 (1-2)                           |                                        | 2 (1-3)                    |                                 | 0 (0-1)                            |                                         | 2 (1-2)              |                           | 0 (0-1)                      |                                   |
| 2012 | United Arab Emirates        | 7 (5-7)                   |                                | 2 (1-2)                           |                                        | 2 (1-2)                    |                                 | 0 (0-0)                            |                                         | 1 (1-2)              |                           | 0 (0-0)                      |                                   |
| 2013 | United Arab Emirates        | 7 (5-7)                   |                                | 1 (1-1)                           |                                        | 2 (1-2)                    |                                 | 0 (0-0)                            |                                         | 1 (1-2)              |                           | 0 (0-0)                      |                                   |
| 2014 | United Arab Emirates        | 5 (3-5)                   |                                | 1 (1-1)                           |                                        | 1 (1-1)                    |                                 | 0 (0-0)                            |                                         | 1 (1-1)              |                           | 0 (0-0)                      |                                   |
| 2015 | United Arab Emirates        | 4 (3-4)                   | 0 (0-0)                        | 1 (1-1)                           | 0 (0-0)                                | 1 (1-1)                    | 0 (0-0)                         | 0 (0-0)                            | 0 (0-0)                                 | 1 (0-1)              | 0 (0-0)                   | 0 (0-0)                      | 0 (0-0)                           |
| 2000 | United Kingdom              | 86 (47-89)                |                                | 2 (1-2)                           |                                        | 49 (22-98)                 |                                 | 1 (1-3)                            |                                         | 43 (20-78)           |                           | 1 (1-2)                      |                                   |
| 2001 | United Kingdom              | 85 (46-88)                |                                | 2 (1-2)                           |                                        | 54 (24-98)                 |                                 | 2 (1-3)                            |                                         | 48 (22-87)           |                           | 1 (1-3)                      |                                   |
| 2002 | United Kingdom              | 52 (37-55)                |                                | 2 (1-2)                           |                                        | 43 (19-78)                 |                                 | 1 (1-2)                            |                                         | 38 (17-69)           |                           | 1 (1-2)                      |                                   |
| 2003 | United Kingdom              | 51 (36-53)                |                                | 2 (1-2)                           |                                        | 49 (22-88)                 |                                 | 1 (1-3)                            |                                         | 43 (20-78)           |                           | 1 (1-2)                      |                                   |
| 2004 | United Kingdom              | 53 (38-55)                |                                | 2 (1-2)                           |                                        | 42 (19-76)                 |                                 | 1 (1-2)                            |                                         | 37 (17-67)           |                           | 1 (1-2)                      |                                   |
| 2005 | United Kingdom              | 57 (41-60)                |                                | 2 (1-2)                           |                                        | 42 (19-75)                 |                                 | 1 (1-2)                            |                                         | 37 (17-67)           |                           | 1 (0-2)                      |                                   |
| 2006 | United Kingdom              | 54 (38-56)                |                                | 2 (1-2)                           |                                        | 50 (23-84)                 |                                 | 1 (0-2)                            |                                         | 26 (12-48)           |                           | 1 (0-1)                      |                                   |
| 2007 | United Kingdom              | 43 (31-45)                |                                | 1 (1-1)                           |                                        | 25 (11-45)                 |                                 | 1 (0-1)                            |                                         | 22 (10-40)           |                           | 1 (0-1)                      |                                   |
| 2008 | United Kingdom              | 43 (31-45)                |                                | 1 (1-1)                           |                                        | 20 (9-36)                  |                                 | 1 (0-1)                            |                                         | 18 (8-32)            |                           | 0 (0-1)                      |                                   |
| 2009 | United Kingdom              | 44 (31-45)                |                                | 1 (1-1)                           |                                        | 22 (10-39)                 |                                 | 1 (0-1)                            |                                         | 19 (9-35)            |                           | 1 (0-1)                      |                                   |
| 2010 | United Kingdom              | 31 (22-32)                |                                | 1 (1-1)                           |                                        | 16 (7-29)                  |                                 | 0 (0-1)                            |                                         | 14 (7-26)            |                           | 0 (0-1)                      |                                   |
| 2011 | United Kingdom              | 21 (15-22)                |                                | 1 (0-1)                           |                                        | 8 (4-15)                   |                                 | 0 (0-0)                            |                                         | 7 (3-13)             |                           | 0 (0-0)                      |                                   |
| 2012 | United Kingdom              | 14 (10-14)                |                                | 0 (0-0)                           |                                        | 5 (2-9)                    |                                 | 0 (0-0)                            |                                         | 5 (2-8)              |                           | 0 (0-0)                      |                                   |
| 2013 | United Kingdom              | 9 (7-10)                  |                                | 0 (0-0)                           |                                        | 4 (1-5)                    |                                 | 0 (0-0)                            |                                         | 3 (1-5)              |                           | 0 (0-0)                      |                                   |
| 2014 | United Kingdom              | 11 (8-11)                 |                                | 0 (0-0)                           |                                        | 4 (2-7)                    |                                 | 0 (0-0)                            |                                         | 3 (2-6)              |                           | 0 (0-0)                      |                                   |
| 2015 | United Kingdom              | 10 (7-11)                 | 0 (0-0)                        | 0 (0-0)                           | 0 (0-0)                                | 4 (2-6)                    | 0 (0-0)                         | 0 (0-0)                            | 0 (0-0)                                 | 3 (1-6)              | 0 (0-0)                   | 0 (0-0)                      | 0 (0-0)                           |
| 2000 | United Republic of Tanzania | 9436 (6692-9836)          |                                | 162 (115-169)                     |                                        | 1908 (806-3927)            |                                 | 33 (14-68)                         |                                         | 600 (253-1235)       |                           | 10 (4-21)                    |                                   |
| 2001 | United Republic of Tanzania | 9111 (6461-9495)          |                                | 152 (108-159)                     |                                        | 1838 (786-3766)            |                                 | 31 (13-63)                         |                                         | 578 (247-1184)       |                           | 10 (4-20)                    |                                   |
| 2002 | United Republic of Tanzania | 8701 (6170-9068)          |                                | 141 (100-147)                     |                                        | 1750 (757-3568)            |                                 | 28 (12-58)                         |                                         | 550 (238-1122)       |                           | 9 (4-18)                     |                                   |
| 2003 | United Republic of Tanzania | 8774 (6222-9144)          |                                | 137 (97-143)                      |                                        | 1756 (770-3561)            |                                 | 27 (12-56)                         |                                         | 552 (242-1119)       |                           | 9 (4-17)                     |                                   |
| 2004 | United Republic of Tanzania | 8545 (6050-8906)          |                                | 128 (91-134)                      |                                        | 1697 (753-3418)            |                                 | 26 (11-51)                         |                                         | 534 (237-1075)       |                           | 8 (4-16)                     |                                   |
| 2005 | United Republic of Tanzania | 8284 (5874-8634)          |                                | 120 (85-125)                      |                                        | 1628 (720-3270)            |                                 | 24 (10-47)                         |                                         | 512 (226-1028)       |                           | 7 (3-15)                     |                                   |
| 2006 | United Republic of Tanzania | 7985 (5662-8322)          |                                | 112 (79-116)                      |                                        | 1555 (703-3093)            |                                 | 22 (10-43)                         |                                         | 488 (221-972)        |                           | 7 (3-14)                     |                                   |
| 2007 | United Republic of Tanzania | 7516 (5330-7833)          |                                | 102 (72-106)                      |                                        | 1447 (671-2858)            |                                 | 20 (9-39)                          |                                         | 455 (211-898)        |                           | 6 (3-12)                     |                                   |
| 2008 | United Republic of Tanzania | 7122 (5050-7422)          |                                | 94 (67-98)                        |                                        | 1359 (565-2736)            |                                 | 18 (7-36)                          |                                         | 1210 (503-2436)      |                           | 16 (7-32)                    |                                   |
| 2009 | United Republic of Tanzania | 6813 (4831-7100)          |                                | 88 (62-91)                        |                                        | 1292 (554-2510)            |                                 | 17 (7-33)                          |                                         | 1150 (463-2283)      |                           | 15 (6-29)                    |                                   |
| 2010 | United Republic of Tanzania | 6586 (4670-6863)          |                                | 82 (58-86)                        |                                        | 1243 (551-2453)            |                                 | 16 (7-31)                          |                                         | 1107 (490-2184)      |                           | 14 (6-27)                    |                                   |
| 2011 | United Republic of Tanzania | 6369 (4516-6637)          |                                | 77 (55-81)                        |                                        | 1198 (538-2348)            |                                 | 15 (7-29)                          |                                         | 1067 (479-2091)      |                           | 13 (6-25)                    |                                   |
| 2012 | United Republic of Tanzania | 6297 (4465-6562)          |                                | 74 (53-77)                        |                                        | 1182 (535-2302)            |                                 | 14 (6-27)                          |                                         | 1052 (476-2050)      |                           | 12 (6-24)                    |                                   |
| 2013 | United Republic of Tanzania | 4423 (3136-4610)          |                                | 51 (36-53)                        |                                        | 782 (356-1517)             |                                 | 9 (4-17)                           |                                         | 696 (317-1350)       |                           | 8 (4-15)                     |                                   |
| 2014 | United Republic of Tanzania | 3466 (2458-3612)          |                                | 38 (27-40)                        |                                        | 601 (276-1160)             |                                 | 7 (3-13)                           |                                         | 535 (246-1033)       |                           | 6 (3-11)                     |                                   |
| 2015 | United Republic of Tanzania | 2942 (2086-3065)          | 285 (202-297)                  | 32 (23-33)                        | 3 (2-3)                                | 530 (246-1021)             | 51 (24-99)                      | 6 (3-11)                           | 1 (0-1)                                 | 472 (219-909)        | 46 (21-88)                | 5 (2-10)                     | 0 (0-1)                           |
| 2000 | United States of America    | 375 (266-391)             |                                | 2 (1-2)                           |                                        | 174 (55-314)               |                                 | 1 (0-2)                            |                                         | 155 (49-280)         |                           | 1 (0-1)                      |                                   |
| 2001 | United States of America    | 365 (273-401)             |                                | 2 (1-2)                           |                                        | 140 (44-252)               |                                 | 1 (0-1)                            |                                         | 124 (40-225)         |                           | 1 (0-1)                      |                                   |
| 2002 | United States of America    | 339 (240-353)             |                                | 2 (1-2)                           |                                        | 114 (36-207)               |                                 | 1 (0-1)                            |                                         | 102 (32-184)         |                           | 1 (0-1)                      |                                   |
| 2003 | United States of America    | 338 (240-352)             |                                | 2 (1-2)                           |                                        | 97 (31-175)                |                                 | 1 (0-1)                            |                                         | 86 (27-156)          |                           | 0 (0-1)                      |                                   |
| 2004 | United States of America    | 285 (202-297)             |                                | 1 (1-2)                           |                                        | 86 (27-156)                |                                 | 0 (0-1)                            |                                         | 77 (24-139)          |                           | 0 (0-1)                      |                                   |
| 2005 | United States of America    | 227 (161-237)             |                                | 1 (1-1)                           |                                        | 79 (25-143)                |                                 | 0 (0-1)                            |                                         | 70 (22-127)          |                           | 0 (0-1)                      |                                   |
| 2006 | United States of America    | 266 (188-277)             |                                | 1 (1-1)                           |                                        | 81 (26-146)                |                                 | 0 (0-1)                            |                                         | 72 (23-130)          |                           | 0 (0-1)                      |                                   |
| 2007 | United States of America    | 224 (159-233)             |                                | 1 (1-1)                           |                                        | 74 (24-134)                |                                 | 0 (0-1)                            |                                         | 66 (21-119)          |                           | 0 (0-1)                      |                                   |
| 2008 | United States of America    | 246 (174-256)             |                                | 1 (1-1)                           |                                        | 67 (21-122)                |                                 | 0 (0-1)                            |                                         | 60 (19-108)          |                           | 0 (0-1)                      |                                   |
| 2009 | United States of America    | 268 (190-279)             |                                | 1 (1-1)                           |                                        | 68 (22-123)                |                                 | 0 (0-1)                            |                                         | 61 (19-110)          |                           | 0 (0-1)                      |                                   |
| 2010 | United States of America    | 192 (136-200)             |                                | 1 (1-1)                           |                                        | 77 (24-139)                |                                 | 0 (0-1)                            |                                         | 68 (22-123)          |                           | 0 (0-1)                      |                                   |
| 2011 | United States of America    | 133 (94-139)              |                                | 1 (0-1)                           |                                        | 27 (9-49)                  |                                 | 0 (0-0)                            |                                         | 24 (8-43)            |                           | 0 (0-0)                      |                                   |
| 2012 | United States of America    | 81 (57-84)                |                                | 0 (0-0)                           |                                        | 17 (6-32)                  |                                 | 0 (0-0)                            |                                         | 16 (5-28)            |                           | 0 (0-0)                      |                                   |
| 2013 | United States of America    | 65 (46-67)                |                                | 0 (0-0)                           |                                        | 21 (7-38)                  |                                 | 0 (0-0)                            |                                         | 19 (6-34)            |                           | 0 (0-0)                      |                                   |
| 2014 | United States of America    | 63 (45-66)                |                                | 0 (0-0)                           |                                        | 16 (5-29)                  |                                 | 0 (0-0)                            |                                         | 14 (5-26)            |                           | 0 (0-0)                      |                                   |
| 2015 | United States of America    | 61 (43-64)                | 0 (0-0)                        | 0 (0-0)                           | 0 (0-0)                                | 15 (5-27)                  | 0 (0-0)                         | 0 (0-0)                            | 0 (0-0)                                 | 13 (4-24)            | 0 (0-0)                   | 0 (0-0)                      | 0 (0-0)                           |
| 2000 | Uruguay                     | 29 (20-30)                |                                | 11 (8-11)                         |                                        | 6 (3-10)                   |                                 | 2 (1-4)                            |                                         | 6 (3-9)              |                           | 2 (1-3)                      |                                   |
| 2001 | Uruguay                     | 35 (25-37)                |                                | 13 (10-14)                        |                                        | 12 (6-19)                  |                                 | 5 (2-7)                            |                                         | 11 (5-17)            |                           | 4 (2-6)                      |                                   |
| 2002 | Uruguay                     | 32 (23-33)                |                                | 12 (9-13)                         |                                        | 10 (5-15)                  |                                 | 4 (2-6)                            |                                         | 9 (4-13)             |                           | 3 (2-5)                      |                                   |
| 2003 | Uruguay                     | 31 (22-32)                |                                | 12 (9-13)                         |                                        | 10 (5-15)                  |                                 | 4 (2-6)                            |                                         | 9 (4-13)             |                           | 3 (2-5)                      |                                   |
| 2004 | Uruguay                     | 23 (16-24)                |                                | 9 (6-9)                           |                                        | 9 (4-14)                   |                                 | 3 (2-5)                            |                                         | 8 (4-12)             |                           | 3 (2-5)                      |                                   |
| 2005 | Uruguay                     | 29 (20-30)                |                                | 11 (8-12)                         |                                        | 10 (5-15)                  |                                 | 4 (2-6)                            |                                         | 9 (4-13)             |                           | 3 (2-5)                      |                                   |
| 2006 | Uruguay                     | 27 (19-28)                |                                | 11 (8-11)                         |                                        | 9 (4-13)                   |                                 | 3 (2-5)                            |                                         | 8 (4-12)             |                           | 3 (1-5)                      |                                   |
| 2007 | Uruguay                     | 31 (22-33)                |                                | 13 (9-13)                         |                                        | 13 (6-20)                  |                                 | 5 (3-8)                            |                                         | 12 (6-18)            |                           | 5 (2-7)                      |                                   |
| 2008 | Uruguay                     | 28 (20-30)                |                                | 12 (8-12)                         |                                        | 8 (4-12)                   |                                 | 3 (2-5)                            |                                         | 7 (3-11)             |                           | 3 (1-4)                      |                                   |
| 2009 | Uruguay                     | 27 (19-28)                |                                | 11 (8-12)                         |                                        | 9 (5-15)                   |                                 | 4 (2-6)                            |                                         | 8 (4-13)             |                           | 3 (2-5)                      |                                   |
| 2010 | Uruguay                     | 15 (10-15)                |                                | 6 (4-6)                           |                                        | 5 (2-7)                    |                                 | 2 (1-3)                            |                                         | 4 (2-7)              |                           | 2 (1-3)                      |                                   |
| 2011 | Uruguay                     | 10 (7-11)                 |                                | 4 (3-5)                           |                                        | 3 (2-5)                    |                                 | 1 (1-2)                            |                                         | 3 (1-5)              |                           | 1 (1-2)                      |                                   |
| 2012 | Uruguay                     | 9 (6-9)                   |                                | 4 (3-4)                           |                                        | 2 (1-3)                    |                                 | 1 (0-1)                            |                                         | 2 (1-3)              |                           | 1 (0-1)                      |                                   |
| 2013 | Uruguay                     | 5 (4-5)                   |                                | 2 (1-2)                           |                                        | 2 (1-4)                    |                                 | 1 (1-2)                            |                                         | 2 (1-3)              |                           | 1 (0-1)                      |                                   |
| 2014 | Uruguay                     | 5 (3-5)                   |                                | 2 (1-2)                           |                                        | 2 (1-2)                    |                                 | 1 (0-1)                            |                                         | 1 (1-2)              |                           | 1 (0-1)                      |                                   |

Spn = *Streptococcus pneumoniae*; npnm = non-pneumonia, non-meningitis; HIV = deaths only in HIV-infected children; Uncertainty range provided in parentheses.

| Year | Country                            | Spn pneumonia    |                  |                             |                                  | Spn meningitis |                  |                             |                                  | Spn NPNM    |                  |                             |                                  |         |              |         |           |         |           |         |          |
|------|------------------------------------|------------------|------------------|-----------------------------|----------------------------------|----------------|------------------|-----------------------------|----------------------------------|-------------|------------------|-----------------------------|----------------------------------|---------|--------------|---------|-----------|---------|-----------|---------|----------|
|      |                                    | deaths (UR)      | deaths, HIV (UR) | deaths, mortality rate (UR) | deaths, mortality rate, HIV (UR) | deaths (UR)    | deaths, HIV (UR) | deaths, mortality rate (UR) | deaths, mortality rate, HIV (UR) | deaths (UR) | deaths, HIV (UR) | deaths, mortality rate (UR) | deaths, mortality rate, HIV (UR) |         |              |         |           |         |           |         |          |
| 2015 | Uruguay                            | 4 (3-4)          |                  | 0 (0-0)                     | 2 (1-2)                          |                | 0 (0-0)          | 1 (1-2)                     |                                  | 0 (0-0)     | 1 (0-1)          |                             | 0 (0-0)                          |         | 1 (1-2)      |         | 0 (0-0)   |         | 0 (0-1)   |         | 0 (0-0)  |
| 2000 | Uzbekistan                         | 1912 (1356-1993) |                  | 71 (50-74)                  | 69 (49-72)                       |                | 299 (116-629)    |                             | 11 (4-23)                        |             | 266 (103-560)    |                             | 10 (4-21)                        |         | 250 (97-525) |         | 10 (4-21) |         | 9 (3-18)  |         | 8 (3-18) |
| 2001 | Uzbekistan                         | 1807 (1281-1883) |                  | 69 (49-72)                  | 67 (47-70)                       |                | 281 (109-589)    |                             | 11 (4-22)                        |             | 235 (92-492)     |                             | 9 (4-19)                         |         | 220 (87-461) |         | 9 (4-19)  |         | 8 (3-18)  |         | 8 (3-18) |
| 2002 | Uzbekistan                         | 1713 (1215-1785) |                  | 67 (47-70)                  | 65 (46-67)                       |                | 264 (103-552)    |                             | 10 (4-22)                        |             | 210 (83-437)     |                             | 9 (4-20)                         |         | 200 (80-416) |         | 9 (4-20)  |         | 8 (3-17)  |         | 8 (3-16) |
| 2003 | Uzbekistan                         | 1627 (1154-1695) |                  | 65 (46-67)                  | 63 (45-66)                       |                | 248 (98-517)     |                             | 10 (4-21)                        |             | 194 (78-401)     |                             | 8 (3-16)                         |         | 189 (76-390) |         | 8 (3-16)  |         | 7 (3-15)  |         | 7 (3-14) |
| 2004 | Uzbekistan                         | 1573 (1115-1639) |                  | 63 (45-66)                  | 61 (43-64)                       |                | 236 (94-491)     |                             | 9 (4-20)                         |             | 186 (76-383)     |                             | 7 (3-14)                         |         | 180 (74-369) |         | 7 (3-14)  |         | 6 (2-12)  |         | 6 (2-11) |
| 2005 | Uzbekistan                         | 1527 (1083-1592) |                  | 61 (43-64)                  | 59 (39-58)                       |                | 225 (90-467)     |                             | 9 (4-19)                         |             | 163 (68-331)     |                             | 6 (2-11)                         |         | 157 (66-319) |         | 6 (2-11)  |         | 5 (2-10)  |         | 5 (2-10) |
| 2006 | Uzbekistan                         | 1509 (1070-1572) |                  | 60 (42-62)                  | 58 (41-61)                       |                | 218 (85-438)     |                             | 8 (3-17)                         |             | 149 (63-302)     |                             | 5 (2-10)                         |         | 149 (63-302) |         | 5 (2-10)  |         | 4 (1-9)   |         | 4 (1-9)  |
| 2007 | Uzbekistan                         | 1500 (1064-1563) |                  | 58 (41-61)                  | 55 (39-58)                       |                | 212 (85-438)     |                             | 8 (3-17)                         |             | 137 (59-289)     |                             | 4 (1-9)                          |         | 137 (59-289) |         | 4 (1-9)   |         | 3 (1-7)   |         | 3 (1-7)  |
| 2008 | Uzbekistan                         | 1510 (1071-1574) |                  | 57 (40-59)                  | 55 (38-56)                       |                | 209 (85-431)     |                             | 8 (3-16)                         |             | 127 (56-267)     |                             | 4 (1-9)                          |         | 127 (56-267) |         | 4 (1-9)   |         | 3 (1-7)   |         | 3 (1-7)  |
| 2009 | Uzbekistan                         | 1514 (1073-1578) |                  | 55 (39-58)                  | 51 (36-53)                       |                | 206 (84-423)     |                             | 8 (3-15)                         |             | 117 (51-238)     |                             | 4 (1-9)                          |         | 117 (51-238) |         | 4 (1-9)   |         | 3 (1-7)   |         | 3 (1-7)  |
| 2010 | Uzbekistan                         | 1510 (1071-1574) |                  | 54 (38-56)                  | 51 (36-53)                       |                | 202 (83-415)     |                             | 7 (3-15)                         |             | 107 (47-217)     |                             | 4 (1-9)                          |         | 107 (47-217) |         | 4 (1-9)   |         | 3 (1-7)   |         | 3 (1-7)  |
| 2011 | Uzbekistan                         | 1489 (1058-1552) |                  | 51 (36-53)                  | 48 (34-50)                       |                | 197 (81-402)     |                             | 7 (3-14)                         |             | 97 (43-196)      |                             | 4 (1-9)                          |         | 97 (43-196)  |         | 4 (1-9)   |         | 3 (1-7)   |         | 3 (1-7)  |
| 2012 | Uzbekistan                         | 1457 (1033-1518) |                  | 48 (34-50)                  | 46 (33-48)                       |                | 190 (79-388)     |                             | 6 (3-13)                         |             | 89 (40-178)      |                             | 4 (1-9)                          |         | 89 (40-178)  |         | 4 (1-9)   |         | 3 (1-7)   |         | 3 (1-7)  |
| 2013 | Uzbekistan                         | 1415 (1004-1475) |                  | 46 (33-48)                  | 44 (30-43)                       |                | 183 (76-372)     |                             | 6 (2-12)                         |             | 82 (37-164)      |                             | 4 (1-9)                          |         | 82 (37-164)  |         | 4 (1-9)   |         | 3 (1-7)   |         | 3 (1-7)  |
| 2014 | Uzbekistan                         | 1374 (974-1432)  |                  | 44 (31-46)                  | 42 (30-43)                       |                | 177 (74-358)     |                             | 6 (2-11)                         |             | 77 (35-154)      |                             | 4 (1-9)                          |         | 77 (35-154)  |         | 4 (1-9)   |         | 3 (1-7)   |         | 3 (1-7)  |
| 2015 | Uzbekistan                         | 1309 (928-1364)  | 6 (4-6)          | 42 (30-43)                  | 40 (28-44)                       | 0 (0-0)        | 168 (71-339)     | 1 (0-1)                     | 5 (2-11)                         | 0 (0-0)     | 157 (66-319)     |                             | 4 (1-9)                          |         | 157 (66-319) |         | 4 (1-9)   |         | 3 (1-7)   |         | 3 (1-7)  |
| 2000 | Vanuatu                            | 7 (5-8)          |                  | 27 (19-28)                  | 26 (19-27)                       |                | 0 (0-1)          |                             | 1 (0-5)                          |             | 0 (0-1)          |                             | 1 (0-5)                          |         | 0 (0-1)      |         | 1 (0-5)   |         | 1 (0-4)   |         | 1 (0-4)  |
| 2001 | Vanuatu                            | 7 (5-8)          |                  | 26 (19-27)                  | 24 (17-25)                       |                | 0 (0-1)          |                             | 1 (0-5)                          |             | 0 (0-1)          |                             | 1 (0-5)                          |         | 0 (0-1)      |         | 1 (0-5)   |         | 1 (0-4)   |         | 1 (0-4)  |
| 2002 | Vanuatu                            | 6 (4-6)          |                  | 21 (15-21)                  | 20 (14-20)                       |                | 0 (0-1)          |                             | 1 (0-4)                          |             | 0 (0-1)          |                             | 1 (0-4)                          |         | 0 (0-1)      |         | 1 (0-4)   |         | 1 (0-3)   |         | 1 (0-3)  |
| 2003 | Vanuatu                            | 5 (3-5)          |                  | 17 (12-18)                  | 16 (11-17)                       |                | 0 (0-1)          |                             | 1 (0-3)                          |             | 0 (0-1)          |                             | 1 (0-3)                          |         | 0 (0-1)      |         | 1 (0-3)   |         | 1 (0-3)   |         | 1 (0-3)  |
| 2004 | Vanuatu                            | 5 (4-5)          |                  | 18 (13-19)                  | 17 (12-18)                       |                | 0 (0-1)          |                             | 1 (0-3)                          |             | 0 (0-1)          |                             | 1 (0-3)                          |         | 0 (0-1)      |         | 1 (0-3)   |         | 1 (0-3)   |         | 1 (0-3)  |
| 2005 | Vanuatu                            | 7 (5-7)          |                  | 23 (17-24)                  | 22 (16-23)                       |                | 0 (0-1)          |                             | 1 (0-4)                          |             | 0 (0-1)          |                             | 1 (0-4)                          |         | 0 (0-1)      |         | 1 (0-4)   |         | 1 (0-4)   |         | 1 (0-4)  |
| 2006 | Vanuatu                            | 7 (5-8)          |                  | 25 (18-26)                  | 24 (17-25)                       |                | 0 (0-1)          |                             | 1 (0-5)                          |             | 0 (0-1)          |                             | 1 (0-4)                          |         | 0 (0-1)      |         | 1 (0-4)   |         | 1 (0-4)   |         | 1 (0-4)  |
| 2007 | Vanuatu                            | 8 (6-8)          |                  | 26 (18-27)                  | 25 (18-26)                       |                | 0 (0-1)          |                             | 1 (0-5)                          |             | 0 (0-1)          |                             | 1 (0-4)                          |         | 0 (0-1)      |         | 1 (0-4)   |         | 1 (0-4)   |         | 1 (0-4)  |
| 2008 | Vanuatu                            | 8 (6-8)          |                  | 26 (18-27)                  | 25 (18-26)                       |                | 0 (0-2)          |                             | 1 (0-5)                          |             | 0 (0-1)          |                             | 1 (0-4)                          |         | 0 (0-1)      |         | 1 (0-4)   |         | 1 (0-4)   |         | 1 (0-4)  |
| 2009 | Vanuatu                            | 9 (6-9)          |                  | 26 (19-27)                  | 25 (18-26)                       |                | 0 (0-2)          |                             | 1 (0-5)                          |             | 0 (0-1)          |                             | 1 (0-4)                          |         | 0 (0-1)      |         | 1 (0-4)   |         | 1 (0-4)   |         | 1 (0-4)  |
| 2010 | Vanuatu                            | 9 (6-9)          |                  | 26 (19-27)                  | 25 (18-26)                       |                | 0 (0-2)          |                             | 1 (0-5)                          |             | 0 (0-1)          |                             | 1 (0-4)                          |         | 0 (0-1)      |         | 1 (0-4)   |         | 1 (0-4)   |         | 1 (0-4)  |
| 2011 | Vanuatu                            | 9 (7-10)         |                  | 27 (19-28)                  | 26 (19-27)                       |                | 1 (0-3)          |                             | 2 (1-9)                          |             | 1 (0-3)          |                             | 2 (0-8)                          |         | 1 (0-3)      |         | 2 (0-8)   |         | 2 (0-8)   |         | 2 (0-8)  |
| 2012 | Vanuatu                            | 10 (7-10)        |                  | 28 (20-29)                  | 27 (19-28)                       |                | 1 (0-4)          |                             | 3 (1-12)                         |             | 1 (0-4)          |                             | 2 (1-10)                         |         | 1 (0-3)      |         | 2 (1-10)  |         | 2 (1-10)  |         | 2 (1-10) |
| 2013 | Vanuatu                            | 9 (7-10)         |                  | 27 (19-28)                  | 26 (19-27)                       |                | 1 (0-4)          |                             | 3 (1-11)                         |             | 1 (0-3)          |                             | 2 (1-10)                         |         | 1 (0-3)      |         | 2 (1-10)  |         | 2 (1-10)  |         | 2 (1-10) |
| 2014 | Vanuatu                            | 9 (6-9)          |                  | 26 (19-27)                  | 25 (18-26)                       |                | 1 (0-4)          |                             | 2 (1-11)                         |             | 1 (0-3)          |                             | 2 (1-9)                          |         | 1 (0-3)      |         | 2 (1-9)   |         | 2 (1-9)   |         | 2 (1-9)  |
| 2015 | Vanuatu                            | 9 (6-9)          | 0 (0-0)          | 25 (18-26)                  | 24 (17-25)                       | 0 (0-0)        | 1 (0-3)          | 0 (0-0)                     | 2 (1-10)                         | 0 (0-0)     | 1 (0-3)          | 0 (0-0)                     | 2 (1-9)                          | 0 (0-0) | 1 (0-3)      | 0 (0-0) | 2 (1-9)   | 0 (0-0) | 2 (1-9)   | 0 (0-0) | 2 (1-9)  |
| 2000 | Venezuela (Bolivarian Republic of) | 277 (197-289)    |                  | 10 (7-10)                   | 9 (7-10)                         |                | 59 (15-172)      |                             | 2 (1-6)                          |             | 53 (13-153)      |                             | 2 (1-6)                          |         | 53 (13-153)  |         | 2 (1-6)   |         | 2 (1-6)   |         | 2 (1-6)  |
| 2001 | Venezuela (Bolivarian Republic of) | 362 (256-377)    |                  | 13 (9-14)                   | 12 (8-12)                        |                | 66 (17-193)      |                             | 2 (1-7)                          |             | 59 (15-172)      |                             | 2 (1-6)                          |         | 59 (15-172)  |         | 2 (1-6)   |         | 2 (1-6)   |         | 2 (1-6)  |
| 2002 | Venezuela (Bolivarian Republic of) | 313 (222-327)    |                  | 11 (8-12)                   | 10 (7-11)                        |                | 67 (18-195)      |                             | 2 (1-7)                          |             | 60 (16-174)      |                             | 2 (1-6)                          |         | 60 (16-174)  |         | 2 (1-6)   |         | 2 (1-6)   |         | 2 (1-6)  |
| 2003 | Venezuela (Bolivarian Republic of) | 367 (260-382)    |                  | 13 (9-14)                   | 12 (8-12)                        |                | 47 (12-136)      |                             | 2 (0-5)                          |             | 42 (11-121)      |                             | 1 (0-4)                          |         | 42 (11-121)  |         | 1 (0-4)   |         | 1 (0-4)   |         | 1 (0-4)  |
| 2004 | Venezuela (Bolivarian Republic of) | 382 (271-399)    |                  | 14 (10-14)                  | 13 (9-14)                        |                | 70 (18-202)      |                             | 2 (1-7)                          |             | 62 (16-180)      |                             | 2 (1-6)                          |         | 62 (16-180)  |         | 2 (1-6)   |         | 2 (1-6)   |         | 2 (1-6)  |
| 2005 | Venezuela (Bolivarian Republic of) | 342 (243-357)    |                  | 12 (8-13)                   | 11 (8-12)                        |                | 82 (18-178)      |                             | 2 (1-6)                          |             | 55 (15-158)      |                             | 2 (1-6)                          |         | 55 (15-158)  |         | 2 (1-6)   |         | 2 (1-6)   |         | 2 (1-6)  |
| 2006 | Venezuela (Bolivarian Republic of) | 346 (245-360)    |                  | 12 (8-13)                   | 11 (8-12)                        |                | 56 (15-162)      |                             | 2 (1-6)                          |             | 50 (13-144)      |                             | 2 (0-5)                          |         | 50 (13-144)  |         | 2 (0-5)   |         | 2 (0-5)   |         | 2 (0-5)  |
| 2007 | Venezuela (Bolivarian Republic of) | 317 (225-330)    |                  | 11 (8-12)                   | 10 (7-11)                        |                | 50 (13-143)      |                             | 2 (0-5)                          |             | 44 (12-127)      |                             | 2 (0-4)                          |         | 44 (12-127)  |         | 2 (0-4)   |         | 2 (0-4)   |         | 2 (0-4)  |
| 2008 | Venezuela (Bolivarian Republic of) | 298 (212-311)    |                  | 10 (7-11)                   | 9 (7-10)                         |                | 52 (14-148)      |                             | 2 (0-5)                          |             | 46 (12-131)      |                             | 2 (0-5)                          |         | 46 (12-131)  |         | 2 (0-5)   |         | 2 (0-5)   |         | 2 (0-5)  |
| 2009 | Venezuela (Bolivarian Republic of) | 282 (200-294)    |                  | 10 (7-10)                   | 9 (7-10)                         |                | 47 (13-135)      |                             | 2 (0-5)                          |             | 42 (11-120)      |                             | 1 (0-4)                          |         | 42 (11-120)  |         | 1 (0-4)   |         | 1 (0-4)   |         | 1 (0-4)  |
| 2010 | Venezuela (Bolivarian Republic of) | 272 (193-284)    |                  | 9 (7-10)                    | 8 (6-8)                          |                | 45 (12-128)      |                             | 2 (0-4)                          |             | 40 (11-114)      |                             | 1 (0-4)                          |         | 40 (11-114)  |         | 1 (0-4)   |         | 1 (0-4)   |         | 1 (0-4)  |
| 2011 | Venezuela (Bolivarian Republic of) | 287 (203-299)    |                  | 10 (7-10)                   | 9 (7-10)                         |                | 57 (15-162)      |                             | 2 (1-6)                          |             | 51 (14-144)      |                             | 2 (0-5)                          |         | 51 (14-144)  |         | 2 (0-5)   |         | 2 (0-5)   |         | 2 (0-5)  |
| 2012 | Venezuela (Bolivarian Republic of) | 275 (193-284)    |                  | 9 (7-10)                    | 8 (6-8)                          |                | 51 (14-146)      |                             | 2 (0-5)                          |             | 46 (12-130)      |                             | 2 (0-4)                          |         | 46 (12-130)  |         | 2 (0-4)   |         | 2 (0-4)   |         | 2 (0-4)  |
| 2013 | Venezuela (Bolivarian Republic of) | 265 (188-277)    |                  | 9 (6-10)                    | 8 (6-8)                          |                | 49 (13-138)      |                             | 2 (0-5)                          |             | 44 (12-123)      |                             | 1 (0-4)                          |         | 44 (12-123)  |         | 1 (0-4)   |         | 1 (0-4)   |         | 1 (0-4)  |
| 2014 | Venezuela (Bolivarian Republic of) | 262 (185-273)    |                  | 9 (6-9)                     | 8 (6-8)                          |                | 48 (13-136)      |                             | 2 (0-5)                          |             | 43 (12-121)      |                             | 1 (0-4)                          |         | 43 (12-121)  |         | 1 (0-4)   |         | 1 (0-4)   |         | 1 (0-4)  |
| 2015 | Venezuela (Bolivarian Republic of) | 239 (170-249)    | 3 (2-3)          | 8 (6-9)                     | 7 (5-8)                          | 0 (0-0)        | 43 (12-123)      | 1 (0-2)                     | 1 (0-4)                          | 0 (0-0)     | 39 (11-109)      | 1 (0-2)                     | 1 (0-4)                          | 0 (0-0) | 39 (11-109)  | 1 (0-2) | 1 (0-4)   | 0 (0-0) | 1 (0-4)   | 0 (0-0) | 1 (0-4)  |
| 2000 | Viet Nam                           | 2253 (1597-2348) |                  | 32 (22-33)                  | 31 (22-32)                       |                | 203 (73-434)     |                             | 3 (1-6)                          |             | 181 (65-386)     |                             | 3 (1-5)                          |         | 181 (65-386) |         | 3 (1-5)   |         | 3 (1-5)   |         | 3 (1-5)  |
| 2001 | Viet Nam                           | 2090 (1482-2178) |                  | 32 (22-33)                  | 31 (22-32)                       |                | 192 (74-401)     |                             | 3 (1-6)                          |             | 171 (66-357)     |                             | 3 (1-5)                          |         | 171 (66-357) |         | 3 (1-5)   |         | 3 (1-5)   |         | 3 (1-5)  |
| 2002 | Viet Nam                           | 2059 (1460-2146) |                  | 32 (22-33)                  | 31 (22-32)                       |                | 193 (81-393)     |                             | 3 (1-6)                          |             | 172 (72-350)     |                             | 3 (1-5)                          |         | 172 (72-350) |         | 3 (1-5)   |         | 3 (1-5)   |         | 3 (1-5)  |
| 2003 | Viet Nam                           | 2063 (1463-2150) |                  | 32 (23-33)                  | 31 (22-32)                       |                | 198 (86-393)     |                             | 3 (1-6)                          |             | 176 (76-350)     |                             | 3 (1-5)                          |         | 176 (76-350) |         | 3 (1-5)   |         | 3 (1-5)   |         | 3 (1-5)  |
| 2004 | Viet Nam                           | 2033 (1442-2119) |                  | 31 (22-32)                  | 30 (21-31)                       |                | 200 (72-466)     |                             | 3 (1-7)                          |             | 178 (64-415)     |                             | 3 (1-6)                          |         | 178 (64-415) |         | 3 (1-6)   |         | 3 (1-6)   |         | 3 (1-6)  |
| 2005 | Viet Nam                           | 1970 (1397-2053) |                  | 30 (21-31)                  | 29 (20-30)                       |                | 198 (77-450)     |                             | 3 (1-7)                          |             | 177 (69-401)     |                             | 3 (1-6)                          |         | 177 (69-401) |         | 3 (1-6)   |         | 3 (1-6)   |         | 3 (1-6)  |
| 2006 | Viet Nam                           | 1885 (1337-1965) |                  | 27 (19-29)                  | 26 (19-28)                       |                | 193 (82-429)     |                             | 3 (1-6)                          |             | 172 (73-382)     |                             | 3 (1-6)                          |         | 172 (73-382) |         | 3 (1-6)   |         | 3 (1-6)</ |         |          |

| Year | Country  | Spn pneumonia deaths (UR) | Spn pneumonia deaths, HIV (UR) | Spn pneumonia mortality rate (UR) | Spn pneumonia mortality rate, HIV (UR) | Spn meningitis deaths (UR) | Spn meningitis deaths, HIV (UR) | Spn meningitis mortality rate (UR) | Spn meningitis mortality rate, HIV (UR) | Spn NPNM deaths (UR) | Spn NPNM deaths, HIV (UR) | Spn NPNM mortality rate (UR) | Spn NPNM mortality rate, HIV (UR) |
|------|----------|---------------------------|--------------------------------|-----------------------------------|----------------------------------------|----------------------------|---------------------------------|------------------------------------|-----------------------------------------|----------------------|---------------------------|------------------------------|-----------------------------------|
| 2007 | Zambia   | 2988 (2119-3114)          |                                | 129 (81-134)                      |                                        | 480 (230-919)              |                                 | 21 (10-40)                         |                                         | 151 (72-289)         |                           | 7 (3-12)                     |                                   |
| 2008 | Zambia   | 2966 (2103-3091)          |                                | 124 (88-130)                      |                                        | 469 (226-897)              |                                 | 20 (9-38)                          |                                         | 148 (71-282)         |                           | 6 (3-12)                     |                                   |
| 2009 | Zambia   | 2921 (2072-3044)          |                                | 119 (85-124)                      |                                        | 454 (219-866)              |                                 | 19 (9-35)                          |                                         | 143 (69-272)         |                           | 6 (3-11)                     |                                   |
| 2010 | Zambia   | 2863 (2030-2984)          |                                | 114 (81-119)                      |                                        | 436 (211-833)              |                                 | 17 (8-33)                          |                                         | 137 (66-262)         |                           | 5 (3-10)                     |                                   |
| 2011 | Zambia   | 2786 (1975-2903)          |                                | 108 (77-113)                      |                                        | 416 (203-797)              |                                 | 16 (8-31)                          |                                         | 131 (64-251)         |                           | 5 (2-10)                     |                                   |
| 2012 | Zambia   | 2672 (1895-2785)          |                                | 101 (72-106)                      |                                        | 394 (171-777)              |                                 | 15 (6-29)                          |                                         | 351 (152-692)        |                           | 13 (6-26)                    |                                   |
| 2013 | Zambia   | 2551 (1809-2659)          |                                | 95 (67-99)                        |                                        | 374 (163-738)              |                                 | 14 (6-27)                          |                                         | 333 (145-657)        |                           | 12 (5-24)                    |                                   |
| 2014 | Zambia   | 1834 (1300-1911)          |                                | 67 (47-70)                        |                                        | 256 (112-506)              |                                 | 7 (4-18)                           |                                         | 228 (99-451)         |                           | 8 (4-16)                     |                                   |
| 2015 | Zambia   | 1509 (1070-1572)          | 358 (254-373)                  | 54 (38-56)                        | 13 (9-13)                              | 209 (92-413)               | 50 (22-98)                      | 7 (3-15)                           | 2 (1-3)                                 | 186 (82-368)         | 44 (19-87)                | 7 (3-13)                     | 2 (1-3)                           |
| 2000 | Zimbabwe | 1604 (1137-1671)          |                                | 89 (63-92)                        |                                        | 240 (82-549)               |                                 | 13 (5-30)                          |                                         | 75 (26-173)          |                           | 4 (1-10)                     |                                   |
| 2001 | Zimbabwe | 1655 (1174-1725)          |                                | 91 (65-95)                        |                                        | 251 (85-574)               |                                 | 14 (5-32)                          |                                         | 79 (27-180)          |                           | 4 (1-10)                     |                                   |
| 2002 | Zimbabwe | 1731 (1227-1803)          |                                | 95 (67-98)                        |                                        | 267 (91-611)               |                                 | 15 (5-33)                          |                                         | 84 (29-192)          |                           | 5 (2-10)                     |                                   |
| 2003 | Zimbabwe | 1821 (1291-1898)          |                                | 98 (70-103)                       |                                        | 288 (98-658)               |                                 | 16 (5-36)                          |                                         | 90 (31-207)          |                           | 5 (2-11)                     |                                   |
| 2004 | Zimbabwe | 1927 (1366-2008)          |                                | 103 (73-107)                      |                                        | 312 (116-713)              |                                 | 17 (6-38)                          |                                         | 98 (33-224)          |                           | 5 (2-12)                     |                                   |
| 2005 | Zimbabwe | 2045 (1450-2132)          |                                | 107 (76-112)                      |                                        | 340 (116-777)              |                                 | 18 (6-41)                          |                                         | 107 (37-244)         |                           | 6 (2-13)                     |                                   |
| 2006 | Zimbabwe | 2143 (1519-2233)          |                                | 110 (78-115)                      |                                        | 365 (124-831)              |                                 | 19 (6-43)                          |                                         | 115 (39-261)         |                           | 6 (2-13)                     |                                   |
| 2007 | Zimbabwe | 2234 (1584-2328)          |                                | 112 (79-117)                      |                                        | 389 (138-872)              |                                 | 19 (7-44)                          |                                         | 122 (43-274)         |                           | 6 (2-14)                     |                                   |
| 2008 | Zimbabwe | 2308 (1636-2405)          |                                | 113 (80-117)                      |                                        | 410 (152-904)              |                                 | 20 (7-44)                          |                                         | 129 (48-284)         |                           | 6 (2-14)                     |                                   |
| 2009 | Zimbabwe | 2364 (1676-2464)          |                                | 112 (80-117)                      |                                        | 424 (165-919)              |                                 | 20 (8-44)                          |                                         | 133 (52-289)         |                           | 6 (2-14)                     |                                   |
| 2010 | Zimbabwe | 2392 (1696-2493)          |                                | 110 (78-115)                      |                                        | 433 (176-920)              |                                 | 20 (8-42)                          |                                         | 136 (55-289)         |                           | 6 (3-13)                     |                                   |
| 2011 | Zimbabwe | 2409 (1708-2510)          |                                | 107 (76-112)                      |                                        | 436 (177-923)              |                                 | 19 (8-41)                          |                                         | 137 (56-290)         |                           | 6 (2-13)                     |                                   |
| 2012 | Zimbabwe | 2179 (1545-2271)          |                                | 94 (67-98)                        |                                        | 389 (162-813)              |                                 | 17 (7-35)                          |                                         | 122 (51-256)         |                           | 5 (2-11)                     |                                   |
| 2013 | Zimbabwe | 1467 (1040-1529)          |                                | 62 (44-65)                        |                                        | 244 (90-521)               |                                 | 10 (4-22)                          |                                         | 218 (80-464)         |                           | 9 (3-20)                     |                                   |
| 2014 | Zimbabwe | 1269 (900-1323)           |                                | 52 (37-55)                        |                                        | 214 (82-451)               |                                 | 9 (3-19)                           |                                         | 190 (73-402)         |                           | 8 (3-17)                     |                                   |
| 2015 | Zimbabwe | 1168 (828-1217)           | 337 (239-352)                  | 47 (34-49)                        | 14 (10-14)                             | 206 (80-434)               | 60 (23-125)                     | 8 (3-18)                           | 2 (1-5)                                 | 183 (71-386)         | 53 (21-112)               | 7 (3-16)                     | 2 (1-5)                           |

Spn = *Streptococcus pneumoniae*; npnm = non-pneumonia, non-meningitis; HIV = deaths only in HIV-infected children; Uncertainty range provided in parentheses.



Table 8: *Haemophilus influenzae* type b mortality by syndrome, country, and year

| Year | Country             | Pneumonia deaths          |                                |                                   |                                        | Meningitis deaths          |                                 |                                    |                                         | NPNM deaths          |                           |                              |                                   |
|------|---------------------|---------------------------|--------------------------------|-----------------------------------|----------------------------------------|----------------------------|---------------------------------|------------------------------------|-----------------------------------------|----------------------|---------------------------|------------------------------|-----------------------------------|
|      |                     | Hib pneumonia deaths (UR) | Hib pneumonia deaths, HIV (UR) | Hib pneumonia mortality rate (UR) | Hib pneumonia mortality rate, HIV (UR) | Hib meningitis deaths (UR) | Hib meningitis deaths, HIV (UR) | Hib meningitis mortality rate (UR) | Hib meningitis mortality rate, HIV (UR) | Hib NPNM deaths (UR) | Hib NPNM deaths, HIV (UR) | Hib NPNM mortality rate (UR) | Hib NPNM mortality rate, HIV (UR) |
| 2000 | Afghanistan         | 4007 (2818-5265)          |                                | 103 (73-136)                      |                                        | 1861 (673-2912)            |                                 | 48 (17-75)                         |                                         | 8 (3-12)             |                           | 0 (0-0)                      |                                   |
| 2001 | Afghanistan         | 4075 (2866-5354)          |                                | 101 (71-133)                      |                                        | 1889 (686-2953)            |                                 | 47 (17-73)                         |                                         | 8 (3-12)             |                           | 0 (0-0)                      |                                   |
| 2002 | Afghanistan         | 4119 (2897-5412)          |                                | 98 (69-129)                       |                                        | 1890 (690-2951)            |                                 | 45 (16-70)                         |                                         | 8 (3-12)             |                           | 0 (0-0)                      |                                   |
| 2003 | Afghanistan         | 4153 (2921-5457)          |                                | 96 (67-128)                       |                                        | 1886 (692-2942)            |                                 | 43 (16-68)                         |                                         | 8 (3-12)             |                           | 0 (0-0)                      |                                   |
| 2004 | Afghanistan         | 4150 (2918-5433)          |                                | 93 (65-122)                       |                                        | 1863 (687-2904)            |                                 | 42 (15-65)                         |                                         | 8 (3-12)             |                           | 0 (0-0)                      |                                   |
| 2005 | Afghanistan         | 4113 (2893-5404)          |                                | 90 (63-118)                       |                                        | 1823 (676-2839)            |                                 | 40 (15-62)                         |                                         | 7 (3-12)             |                           | 0 (0-0)                      |                                   |
| 2006 | Afghanistan         | 4088 (2876-5373)          |                                | 87 (61-114)                       |                                        | 1788 (666-2782)            |                                 | 38 (14-59)                         |                                         | 7 (3-11)             |                           | 0 (0-0)                      |                                   |
| 2007 | Afghanistan         | 4041 (2842-5309)          |                                | 84 (59-111)                       |                                        | 1736 (650-2698)            |                                 | 36 (14-56)                         |                                         | 7 (3-11)             |                           | 0 (0-0)                      |                                   |
| 2008 | Afghanistan         | 3977 (2797-5225)          |                                | 82 (58-108)                       |                                        | 1676 (620-2603)            |                                 | 35 (13-54)                         |                                         | 7 (3-11)             |                           | 0 (0-0)                      |                                   |
| 2009 | Afghanistan         | 1455 (1024-1912)          |                                | 30 (21-39)                        |                                        | 600 (227-931)              |                                 | 12 (5-19)                          |                                         | 2 (1-4)              |                           | 0 (0-0)                      |                                   |
| 2010 | Afghanistan         | 464 (327-610)             |                                | 9 (7-12)                          |                                        | 188 (71-291)               |                                 | 4 (1-6)                            |                                         | 1 (0-1)              |                           | 0 (0-0)                      |                                   |
| 2011 | Afghanistan         | 436 (306-572)             |                                | 9 (6-12)                          |                                        | 173 (66-269)               |                                 | 4 (1-5)                            |                                         | 1 (0-1)              |                           | 0 (0-0)                      |                                   |
| 2012 | Afghanistan         | 424 (299-558)             |                                | 9 (6-11)                          |                                        | 167 (64-259)               |                                 | 3 (1-5)                            |                                         | 1 (0-1)              |                           | 0 (0-0)                      |                                   |
| 2013 | Afghanistan         | 388 (273-510)             |                                | 8 (6-10)                          |                                        | 152 (58-235)               |                                 | 3 (1-5)                            |                                         | 1 (0-1)              |                           | 0 (0-0)                      |                                   |
| 2014 | Afghanistan         | 32 (23-42)                |                                | 1 (0-1)                           |                                        | 13 (5-19)                  |                                 | 0 (0-0)                            |                                         | 0 (0-0)              |                           | 0 (0-0)                      |                                   |
| 2015 | Afghanistan         | 31 (22-40)                | 0 (0-0)                        | 1 (0-1)                           | 0 (0-0)                                | 12 (5-18)                  | 0 (0-0)                         | 0 (0-0)                            | 0 (0-0)                                 | 0 (0-0)              | 0 (0-0)                   | 0 (0-0)                      | 0 (0-0)                           |
| 2000 | Albania             | 40 (28-52)                |                                | 15 (10-19)                        |                                        | 10 (2-20)                  |                                 | 4 (1-7)                            |                                         | 0 (0-0)              |                           | 0 (0-0)                      |                                   |
| 2001 | Albania             | 34 (24-45)                |                                | 13 (9-17)                         |                                        | 9 (1-18)                   |                                 | 3 (0-7)                            |                                         | 0 (0-0)              |                           | 0 (0-0)                      |                                   |
| 2002 | Albania             | 29 (21-38)                |                                | 12 (8-15)                         |                                        | 7 (1-16)                   |                                 | 3 (0-7)                            |                                         | 0 (0-0)              |                           | 0 (0-0)                      |                                   |
| 2003 | Albania             | 25 (18-33)                |                                | 11 (8-14)                         |                                        | 6 (1-14)                   |                                 | 3 (0-6)                            |                                         | 0 (0-0)              |                           | 0 (0-0)                      |                                   |
| 2004 | Albania             | 22 (16-29)                |                                | 10 (7-13)                         |                                        | 6 (1-13)                   |                                 | 3 (0-6)                            |                                         | 0 (0-0)              |                           | 0 (0-0)                      |                                   |
| 2005 | Albania             | 19 (13-25)                |                                | 9 (6-12)                          |                                        | 5 (0-11)                   |                                 | 2 (0-5)                            |                                         | 0 (0-0)              |                           | 0 (0-0)                      |                                   |
| 2006 | Albania             | 17 (12-22)                |                                | 8 (6-11)                          |                                        | 4 (0-10)                   |                                 | 2 (0-5)                            |                                         | 0 (0-0)              |                           | 0 (0-0)                      |                                   |
| 2007 | Albania             | 15 (10-19)                |                                | 8 (6-10)                          |                                        | 4 (0-8)                    |                                 | 2 (0-5)                            |                                         | 0 (0-0)              |                           | 0 (0-0)                      |                                   |
| 2008 | Albania             | 13 (9-17)                 |                                | 8 (5-10)                          |                                        | 3 (0-7)                    |                                 | 2 (0-4)                            |                                         | 0 (0-0)              |                           | 0 (0-0)                      |                                   |
| 2009 | Albania             | 2 (1-3)                   |                                | 1 (1-2)                           |                                        | 1 (0-2)                    |                                 | 0 (0-1)                            |                                         | 0 (0-0)              |                           | 0 (0-0)                      |                                   |
| 2010 | Albania             | 1 (1-1)                   |                                | 0 (0-1)                           |                                        | 0 (0-1)                    |                                 | 0 (0-0)                            |                                         | 0 (0-0)              |                           | 0 (0-0)                      |                                   |
| 2011 | Albania             | 1 (1-1)                   |                                | 1 (0-1)                           |                                        | 0 (0-1)                    |                                 | 0 (0-0)                            |                                         | 0 (0-0)              |                           | 0 (0-0)                      |                                   |
| 2012 | Albania             | 1 (1-1)                   |                                | 1 (0-1)                           |                                        | 0 (0-1)                    |                                 | 0 (0-0)                            |                                         | 0 (0-0)              |                           | 0 (0-0)                      |                                   |
| 2013 | Albania             | 1 (1-1)                   |                                | 1 (0-1)                           |                                        | 0 (0-1)                    |                                 | 0 (0-0)                            |                                         | 0 (0-0)              |                           | 0 (0-0)                      |                                   |
| 2014 | Albania             | 0 (0-0)                   |                                | 0 (0-0)                           |                                        | 0 (0-0)                    |                                 | 0 (0-0)                            |                                         | 0 (0-0)              |                           | 0 (0-0)                      |                                   |
| 2015 | Albania             | 0 (0-0)                   | 0 (0-0)                        | 0 (0-0)                           | 0 (0-0)                                | 0 (0-0)                    | 0 (0-0)                         | 0 (0-0)                            | 0 (0-0)                                 | 0 (0-0)              | 0 (0-0)                   | 0 (0-0)                      | 0 (0-0)                           |
| 2000 | Algeria             | 542 (382-713)             |                                | 18 (13-23)                        |                                        | 126 (40-208)               |                                 | 4 (1-7)                            |                                         | 1 (0-2)              |                           | 0 (0-0)                      |                                   |
| 2001 | Algeria             | 521 (366-684)             |                                | 18 (13-24)                        |                                        | 120 (38-198)               |                                 | 4 (1-7)                            |                                         | 1 (0-2)              |                           | 0 (0-0)                      |                                   |
| 2002 | Algeria             | 500 (352-658)             |                                | 18 (12-23)                        |                                        | 114 (36-188)               |                                 | 4 (1-7)                            |                                         | 1 (0-2)              |                           | 0 (0-0)                      |                                   |
| 2003 | Algeria             | 485 (341-637)             |                                | 17 (12-23)                        |                                        | 110 (35-180)               |                                 | 4 (1-6)                            |                                         | 1 (0-1)              |                           | 0 (0-0)                      |                                   |
| 2004 | Algeria             | 474 (334-623)             |                                | 17 (12-22)                        |                                        | 106 (34-175)               |                                 | 4 (1-6)                            |                                         | 1 (0-1)              |                           | 0 (0-0)                      |                                   |
| 2005 | Algeria             | 467 (328-613)             |                                | 16 (11-21)                        |                                        | 104 (33-171)               |                                 | 4 (1-6)                            |                                         | 1 (0-1)              |                           | 0 (0-0)                      |                                   |
| 2006 | Algeria             | 473 (333-622)             |                                | 16 (11-21)                        |                                        | 105 (34-173)               |                                 | 3 (1-6)                            |                                         | 1 (0-1)              |                           | 0 (0-0)                      |                                   |
| 2007 | Algeria             | 478 (336-628)             |                                | 15 (11-20)                        |                                        | 105 (35-173)               |                                 | 3 (1-5)                            |                                         | 1 (0-1)              |                           | 0 (0-0)                      |                                   |
| 2008 | Algeria             | 76 (54-100)               |                                | 2 (2-3)                           |                                        | 17 (2-29)                  |                                 | 0 (0-1)                            |                                         | 0 (0-0)              |                           | 0 (0-0)                      |                                   |
| 2009 | Algeria             | 36 (25-47)                |                                | 1 (1-1)                           |                                        | 8 (1-14)                   |                                 | 0 (0-0)                            |                                         | 0 (0-0)              |                           | 0 (0-0)                      |                                   |
| 2010 | Algeria             | 36 (26-48)                |                                | 1 (1-1)                           |                                        | 8 (1-14)                   |                                 | 0 (0-0)                            |                                         | 0 (0-0)              |                           | 0 (0-0)                      |                                   |
| 2011 | Algeria             | 36 (25-47)                |                                | 1 (1-1)                           |                                        | 8 (1-14)                   |                                 | 0 (0-0)                            |                                         | 0 (0-0)              |                           | 0 (0-0)                      |                                   |
| 2012 | Algeria             | 36 (26-48)                |                                | 1 (1-1)                           |                                        | 8 (1-14)                   |                                 | 0 (0-0)                            |                                         | 0 (0-0)              |                           | 0 (0-0)                      |                                   |
| 2013 | Algeria             | 5 (4-7)                   |                                | 0 (0-0)                           |                                        | 1 (0-2)                    |                                 | 0 (0-0)                            |                                         | 0 (0-0)              |                           | 0 (0-0)                      |                                   |
| 2014 | Algeria             | 5 (4-7)                   |                                | 0 (0-0)                           |                                        | 1 (0-2)                    |                                 | 0 (0-0)                            |                                         | 0 (0-0)              |                           | 0 (0-0)                      |                                   |
| 2015 | Algeria             | 5 (3-7)                   | 0 (0-0)                        | 0 (0-0)                           | 0 (0-0)                                | 1 (0-2)                    | 0 (0-0)                         | 0 (0-0)                            | 0 (0-0)                                 | 0 (0-0)              | 0 (0-0)                   | 0 (0-0)                      | 0 (0-0)                           |
| 2000 | Andorra             | 0 (0-0)                   |                                | 0 (0-0)                           |                                        | 0 (0-0)                    |                                 | 0 (0-0)                            |                                         | 0 (0-0)              |                           | 0 (0-0)                      |                                   |
| 2001 | Andorra             | 0 (0-0)                   |                                | 0 (0-0)                           |                                        | 0 (0-0)                    |                                 | 0 (0-0)                            |                                         | 0 (0-0)              |                           | 0 (0-0)                      |                                   |
| 2002 | Andorra             | 0 (0-0)                   |                                | 0 (0-0)                           |                                        | 0 (0-0)                    |                                 | 0 (0-0)                            |                                         | 0 (0-0)              |                           | 0 (0-0)                      |                                   |
| 2003 | Andorra             | 0 (0-0)                   |                                | 0 (0-0)                           |                                        | 0 (0-0)                    |                                 | 0 (0-0)                            |                                         | 0 (0-0)              |                           | 0 (0-0)                      |                                   |
| 2004 | Andorra             | 0 (0-0)                   |                                | 0 (0-0)                           |                                        | 0 (0-0)                    |                                 | 0 (0-0)                            |                                         | 0 (0-0)              |                           | 0 (0-0)                      |                                   |
| 2005 | Andorra             | 0 (0-0)                   |                                | 0 (0-0)                           |                                        | 0 (0-0)                    |                                 | 0 (0-0)                            |                                         | 0 (0-0)              |                           | 0 (0-0)                      |                                   |
| 2006 | Andorra             | 0 (0-0)                   |                                | 0 (0-0)                           |                                        | 0 (0-0)                    |                                 | 0 (0-0)                            |                                         | 0 (0-0)              |                           | 0 (0-0)                      |                                   |
| 2007 | Andorra             | 0 (0-0)                   |                                | 0 (0-0)                           |                                        | 0 (0-0)                    |                                 | 0 (0-0)                            |                                         | 0 (0-0)              |                           | 0 (0-0)                      |                                   |
| 2008 | Andorra             | 0 (0-0)                   |                                | 0 (0-0)                           |                                        | 0 (0-0)                    |                                 | 0 (0-0)                            |                                         | 0 (0-0)              |                           | 0 (0-0)                      |                                   |
| 2009 | Andorra             | 0 (0-0)                   |                                | 0 (0-0)                           |                                        | 0 (0-0)                    |                                 | 0 (0-0)                            |                                         | 0 (0-0)              |                           | 0 (0-0)                      |                                   |
| 2010 | Andorra             | 0 (0-0)                   |                                | 0 (0-0)                           |                                        | 0 (0-0)                    |                                 | 0 (0-0)                            |                                         | 0 (0-0)              |                           | 0 (0-0)                      |                                   |
| 2011 | Andorra             | 0 (0-0)                   |                                | 0 (0-0)                           |                                        | 0 (0-0)                    |                                 | 0 (0-0)                            |                                         | 0 (0-0)              |                           | 0 (0-0)                      |                                   |
| 2012 | Andorra             | 0 (0-0)                   |                                | 0 (0-0)                           |                                        | 0 (0-0)                    |                                 | 0 (0-0)                            |                                         | 0 (0-0)              |                           | 0 (0-0)                      |                                   |
| 2013 | Andorra             | 0 (0-0)                   |                                | 0 (0-0)                           |                                        | 0 (0-0)                    |                                 | 0 (0-0)                            |                                         | 0 (0-0)              |                           | 0 (0-0)                      |                                   |
| 2014 | Andorra             | 0 (0-0)                   |                                | 0 (0-0)                           |                                        | 0 (0-0)                    |                                 | 0 (0-0)                            |                                         | 0 (0-0)              |                           | 0 (0-0)                      |                                   |
| 2015 | Andorra             | 0 (0-0)                   | 0 (0-0)                        | 0 (0-0)                           | 0 (0-0)                                | 0 (0-0)                    | 0 (0-0)                         | 0 (0-0)                            | 0 (0-0)                                 | 0 (0-0)              | 0 (0-0)                   | 0 (0-0)                      | 0 (0-0)                           |
| 2000 | Angola              | 4211 (2961-5533)          |                                | 143 (101-188)                     |                                        | 1355 (621-2021)            |                                 | 46 (21-69)                         |                                         | 6 (3-8)              |                           | 0 (0-0)                      |                                   |
| 2001 | Angola              | 4304 (3027-5655)          |                                | 141 (99-185)                      |                                        | 1370 (628-2042)            |                                 | 45 (21-67)                         |                                         | 6 (3-8)              |                           | 0 (0-0)                      |                                   |
| 2002 | Angola              | 4524 (3182-5944)          |                                | 143 (101-188)                     |                                        | 1418 (651-2113)            |                                 | 45 (21-67)                         |                                         | 6 (3-9)              |                           | 0 (0-0)                      |                                   |
| 2003 | Angola              | 4855 (3274-6116)          |                                | 142 (100-187)                     |                                        | 1429 (656-2128)            |                                 | 44 (20-65)                         |                                         | 6 (3-9)              |                           | 0 (0-0)                      |                                   |
| 2004 | Angola              | 4827 (3395-6342)          |                                | 143 (100-188)                     |                                        | 1441 (663-2146)            |                                 | 43 (20-63)                         |                                         | 6 (3-9)              |                           | 0 (0-0)                      |                                   |
| 2005 | Angola              | 5029 (3537-6508)          |                                | 144 (101-189)                     |                                        | 1466 (675-2182)            |                                 | 42 (19-62)                         |                                         | 6 (3-8)              |                           | 0 (0-0)                      |                                   |
| 2006 | Angola              | 5245 (3689-6892)          |                                | 144 (102-190)                     |                                        | 1490 (687-2218)            |                                 | 41 (19-61)                         |                                         | 6 (3-9)              |                           | 0 (0-0)                      |                                   |
| 2007 | Angola              | 1365 (960-1793)           |                                | 36 (26-48)                        |                                        | 379 (175-564)              |                                 | 10 (5-15)                          |                                         | 2 (1-2)              |                           | 0 (0-0)                      |                                   |
| 2008 | Angola              | 653 (459-858)             |                                | 17 (12-22)                        |                                        | 179 (83-266)               |                                 | 5 (2-7)                            |                                         | 1 (0-1)              |                           | 0 (0-0)                      |                                   |
| 2009 | Angola              | 739 (520-971)             |                                | 19 (13-24)                        |                                        | 200 (93-297)               |                                 | 5 (2-7)                            |                                         | 1 (0-1)              |                           | 0 (0-0)                      |                                   |
| 2010 | Angola              | 588 (413-772)             |                                | 14 (10-19)                        |                                        | 158 (74-235)               |                                 | 4 (2-6)                            |                                         | 1 (0-1)              |                           | 0 (0-0)                      |                                   |
| 2011 | Angola              | 632 (444-830)             |                                | 15 (11-20)                        |                                        | 170 (79-252)               |                                 | 4 (2-6)                            |                                         | 1 (0-1)              |                           | 0 (0-0)                      |                                   |
| 2012 | Angola              | 56 (39-73)                |                                | 1 (1-2)                           |                                        | 15 (7-22)                  |                                 | 0 (0-1)                            |                                         | 0 (0-0)              |                           | 0 (0-0)                      |                                   |
| 2013 | Angola              | 55 (39-72)                |                                | 1 (1-2)                           |                                        | 15 (7-22)                  |                                 | 0 (0-0)                            |                                         | 0 (0-0)              |                           | 0 (0-0)                      |                                   |
| 2014 | Angola              | 684 (481-899)             |                                | 15 (11-20)                        |                                        | 182 (86-270)               |                                 | 4 (2-6)                            |                                         | 1 (0-1)              |                           | 0 (0-0)                      |                                   |
| 2015 | Angola              | 672 (473-883)             | 16 (11-21)                     | 14 (10-19)                        | 0 (0-0)                                | 178 (84-284)               | 4 (2-6)                         | 4 (2-6)                            | 0 (0-0)                                 | 0 (0-0)              | 0 (0-0)                   | 0 (0-0)                      | 0 (0-0)                           |
| 2000 | Antigua and Barbuda | 0 (0-0)                   |                                | 0 (0-0)                           |                                        | 0 (0-0)                    |                                 | 1 (1-3)                            |                                         | 0 (0-0)              |                           | 0 (0-0)                      |                                   |
| 2001 | Antigua and Barbuda | 0 (0-0)                   |                                | 0 (0-0)                           |                                        | 0 (0-0)                    |                                 | 1 (0-1)                            |                                         | 0 (0-0)              |                           | 0 (0-0)                      |                                   |
| 2002 | Antigua and Barbuda | 0 (0-0)                   |                                | 0 (0-0)                           |                                        | 0 (0-0)                    |                                 | 0 (0-0)                            |                                         | 0 (0-0)              |                           | 0 (0-0)                      |                                   |
| 2003 | Antigua and Barbuda | 0 (0-0)                   |                                | 0 (0-0)                           |                                        | 0 (0-0)                    |                                 | 0 (0-0)                            |                                         | 0 (0-0)              |                           | 0 (0-0)                      |                                   |
| 2004 | Antigua and Barbuda | 0 (0-0)                   |                                | 0 (0-0)                           |                                        | 0 (0-0)                    |                                 | 0 (0-0)                            |                                         | 0 (0-0)              |                           | 0 (0-0)                      |                                   |
| 2005 | Antigua and Barbuda | 0 (0-0)                   |                                | 0 (0-0)                           |                                        | 0 (0-0)                    |                                 | 0 (0-0)                            |                                         | 0 (0-0)              |                           | 0 (0-0)                      |                                   |
| 2006 | Antigua and Barbuda | 0 (0-0)                   |                                | 0 (0-0)                           |                                        | 0 (0-0)                    |                                 | 0 (0-0)                            |                                         | 0 (0-0)              |                           | 0 (0-0)                      |                                   |

Hib = *Haemophilus influenzae* type b; npnm = non-pneumonia, non-meningitis; HIV = deaths only in HIV-infected children; Uncertainty range provided in parentheses.

| Year | Country             | Hib pneumonia deaths (UR) | Hib pneumonia deaths, HIV (UR) | Hib pneumonia mortality rate (UR) | Hib pneumonia mortality rate, HIV (UR) | Hib meningitis deaths (UR) | Hib meningitis deaths, HIV (UR) | Hib meningitis mortality rate (UR) | Hib meningitis mortality rate, HIV (UR) | Hib NPNM deaths (UR) | Hib NPNM deaths, HIV (UR) | Hib NPNM mortality rate (UR) | Hib NPNM mortality rate, HIV (UR) |
|------|---------------------|---------------------------|--------------------------------|-----------------------------------|----------------------------------------|----------------------------|---------------------------------|------------------------------------|-----------------------------------------|----------------------|---------------------------|------------------------------|-----------------------------------|
| 2007 | Antigua and Barbuda | 0 (0-0)                   |                                | 0 (0-0)                           |                                        | 0 (0-0)                    |                                 | 0 (0-0)                            |                                         | 0 (0-0)              |                           | 0 (0-0)                      |                                   |
| 2008 | Antigua and Barbuda | 0 (0-0)                   |                                | 0 (0-0)                           |                                        | 0 (0-0)                    |                                 | 0 (0-0)                            |                                         | 0 (0-0)              |                           | 0 (0-0)                      |                                   |
| 2009 | Antigua and Barbuda | 0 (0-0)                   |                                | 0 (0-0)                           |                                        | 0 (0-0)                    |                                 | 0 (0-0)                            |                                         | 0 (0-0)              |                           | 0 (0-0)                      |                                   |
| 2010 | Antigua and Barbuda | 0 (0-0)                   |                                | 0 (0-0)                           |                                        | 0 (0-0)                    |                                 | 0 (0-0)                            |                                         | 0 (0-0)              |                           | 0 (0-0)                      |                                   |
| 2011 | Antigua and Barbuda | 0 (0-0)                   |                                | 0 (0-0)                           |                                        | 0 (0-0)                    |                                 | 0 (0-0)                            |                                         | 0 (0-0)              |                           | 0 (0-0)                      |                                   |
| 2012 | Antigua and Barbuda | 0 (0-0)                   |                                | 0 (0-0)                           |                                        | 0 (0-0)                    |                                 | 0 (0-0)                            |                                         | 0 (0-0)              |                           | 0 (0-0)                      |                                   |
| 2013 | Antigua and Barbuda | 0 (0-0)                   |                                | 0 (0-0)                           |                                        | 0 (0-0)                    |                                 | 0 (0-0)                            |                                         | 0 (0-0)              |                           | 0 (0-0)                      |                                   |
| 2014 | Antigua and Barbuda | 0 (0-0)                   |                                | 0 (0-0)                           |                                        | 0 (0-0)                    |                                 | 0 (0-0)                            |                                         | 0 (0-0)              |                           | 0 (0-0)                      |                                   |
| 2015 | Antigua and Barbuda | 0 (0-0)                   | 0 (0-0)                        | 0 (0-0)                           | 0 (0-0)                                | 0 (0-0)                    | 0 (0-0)                         | 0 (0-0)                            | 0 (0-0)                                 | 0 (0-0)              | 0 (0-0)                   | 0 (0-0)                      | 0 (0-0)                           |
| 2000 | Argentina           | 18 (12-23)                |                                | 1 (0-1)                           |                                        | 9 (3-16)                   |                                 | 0 (0-0)                            |                                         | 0 (0-0)              |                           | 0 (0-0)                      |                                   |
| 2001 | Argentina           | 18 (13-24)                |                                | 1 (0-1)                           |                                        | 8 (3-14)                   |                                 | 0 (0-0)                            |                                         | 0 (0-0)              |                           | 0 (0-0)                      |                                   |
| 2002 | Argentina           | 14 (10-19)                |                                | 0 (0-1)                           |                                        | 7 (2-12)                   |                                 | 0 (0-0)                            |                                         | 0 (0-0)              |                           | 0 (0-0)                      |                                   |
| 2003 | Argentina           | 3 (2-4)                   |                                | 0 (0-0)                           |                                        | 1 (0-2)                    |                                 | 0 (0-0)                            |                                         | 0 (0-0)              |                           | 0 (0-0)                      |                                   |
| 2004 | Argentina           | 2 (2-3)                   |                                | 0 (0-0)                           |                                        | 1 (0-2)                    |                                 | 0 (0-0)                            |                                         | 0 (0-0)              |                           | 0 (0-0)                      |                                   |
| 2005 | Argentina           | 2 (1-2)                   |                                | 0 (0-0)                           |                                        | 1 (0-2)                    |                                 | 0 (0-0)                            |                                         | 0 (0-0)              |                           | 0 (0-0)                      |                                   |
| 2006 | Argentina           | 2 (1-2)                   |                                | 0 (0-0)                           |                                        | 1 (0-2)                    |                                 | 0 (0-0)                            |                                         | 0 (0-0)              |                           | 0 (0-0)                      |                                   |
| 2007 | Argentina           | 2 (2-3)                   |                                | 0 (0-0)                           |                                        | 1 (0-1)                    |                                 | 0 (0-0)                            |                                         | 0 (0-0)              |                           | 0 (0-0)                      |                                   |
| 2008 | Argentina           | 2 (1-2)                   |                                | 0 (0-0)                           |                                        | 1 (0-1)                    |                                 | 0 (0-0)                            |                                         | 0 (0-0)              |                           | 0 (0-0)                      |                                   |
| 2009 | Argentina           | 2 (2-3)                   |                                | 0 (0-0)                           |                                        | 1 (0-1)                    |                                 | 0 (0-0)                            |                                         | 0 (0-0)              |                           | 0 (0-0)                      |                                   |
| 2010 | Argentina           | 2 (1-2)                   |                                | 0 (0-0)                           |                                        | 1 (0-1)                    |                                 | 0 (0-0)                            |                                         | 0 (0-0)              |                           | 0 (0-0)                      |                                   |
| 2011 | Argentina           | 2 (1-2)                   |                                | 0 (0-0)                           |                                        | 1 (0-1)                    |                                 | 0 (0-0)                            |                                         | 0 (0-0)              |                           | 0 (0-0)                      |                                   |
| 2012 | Argentina           | 2 (1-2)                   |                                | 0 (0-0)                           |                                        | 1 (0-1)                    |                                 | 0 (0-0)                            |                                         | 0 (0-0)              |                           | 0 (0-0)                      |                                   |
| 2013 | Argentina           | 2 (1-2)                   |                                | 0 (0-0)                           |                                        | 1 (0-1)                    |                                 | 0 (0-0)                            |                                         | 0 (0-0)              |                           | 0 (0-0)                      |                                   |
| 2014 | Argentina           | 2 (1-2)                   |                                | 0 (0-0)                           |                                        | 1 (0-1)                    |                                 | 0 (0-0)                            |                                         | 0 (0-0)              |                           | 0 (0-0)                      |                                   |
| 2015 | Argentina           | 2 (1-2)                   | 0 (0-0)                        | 0 (0-0)                           | 0 (0-0)                                | 1 (0-1)                    | 0 (0-0)                         | 0 (0-0)                            | 0 (0-0)                                 | 0 (0-0)              | 0 (0-0)                   | 0 (0-0)                      | 0 (0-0)                           |
| 2000 | Armenia             | 28 (20-37)                |                                | 14 (10-19)                        |                                        | 9 (2-15)                   |                                 | 5 (1-8)                            |                                         | 0 (0-0)              |                           | 0 (0-0)                      |                                   |
| 2001 | Armenia             | 26 (18-35)                |                                | 14 (10-19)                        |                                        | 9 (1-15)                   |                                 | 5 (0-8)                            |                                         | 0 (0-0)              |                           | 0 (0-0)                      |                                   |
| 2002 | Armenia             | 25 (18-33)                |                                | 14 (10-18)                        |                                        | 9 (1-15)                   |                                 | 5 (0-8)                            |                                         | 0 (0-0)              |                           | 0 (0-0)                      |                                   |
| 2003 | Armenia             | 25 (17-32)                |                                | 13 (9-17)                         |                                        | 8 (1-15)                   |                                 | 5 (0-8)                            |                                         | 0 (0-0)              |                           | 0 (0-0)                      |                                   |
| 2004 | Armenia             | 24 (17-31)                |                                | 12 (9-16)                         |                                        | 8 (1-14)                   |                                 | 4 (0-8)                            |                                         | 0 (0-0)              |                           | 0 (0-0)                      |                                   |
| 2005 | Armenia             | 22 (16-29)                |                                | 11 (8-15)                         |                                        | 8 (1-14)                   |                                 | 4 (0-7)                            |                                         | 0 (0-0)              |                           | 0 (0-0)                      |                                   |
| 2006 | Armenia             | 21 (15-27)                |                                | 10 (7-13)                         |                                        | 7 (1-13)                   |                                 | 4 (0-6)                            |                                         | 0 (0-0)              |                           | 0 (0-0)                      |                                   |
| 2007 | Armenia             | 19 (14-25)                |                                | 9 (7-12)                          |                                        | 7 (1-12)                   |                                 | 3 (0-6)                            |                                         | 0 (0-0)              |                           | 0 (0-0)                      |                                   |
| 2008 | Armenia             | 18 (12-23)                |                                | 8 (6-11)                          |                                        | 6 (1-11)                   |                                 | 3 (0-5)                            |                                         | 0 (0-0)              |                           | 0 (0-0)                      |                                   |
| 2009 | Armenia             | 16 (11-21)                |                                | 8 (5-10)                          |                                        | 6 (1-10)                   |                                 | 3 (0-5)                            |                                         | 0 (0-0)              |                           | 0 (0-0)                      |                                   |
| 2010 | Armenia             | 8 (6-11)                  |                                | 4 (3-5)                           |                                        | 4 (1-8)                    |                                 | 2 (0-4)                            |                                         | 0 (0-0)              |                           | 0 (0-0)                      |                                   |
| 2011 | Armenia             | 1 (1-1)                   |                                | 1 (0-1)                           |                                        | 1 (0-1)                    |                                 | 0 (0-1)                            |                                         | 0 (0-0)              |                           | 0 (0-0)                      |                                   |
| 2012 | Armenia             | 1 (1-1)                   |                                | 0 (0-1)                           |                                        | 1 (0-1)                    |                                 | 0 (0-1)                            |                                         | 0 (0-0)              |                           | 0 (0-0)                      |                                   |
| 2013 | Armenia             | 1 (1-1)                   |                                | 0 (0-1)                           |                                        | 0 (0-0)                    |                                 | 0 (0-0)                            |                                         | 0 (0-0)              |                           | 0 (0-0)                      |                                   |
| 2014 | Armenia             | 1 (1-1)                   |                                | 0 (0-1)                           |                                        | 1 (0-1)                    |                                 | 0 (0-0)                            |                                         | 0 (0-0)              |                           | 0 (0-0)                      |                                   |
| 2015 | Armenia             | 0 (0-0)                   | 0 (0-0)                        | 0 (0-0)                           | 0 (0-0)                                | 0 (0-0)                    | 0 (0-0)                         | 0 (0-0)                            | 0 (0-0)                                 | 0 (0-0)              | 0 (0-0)                   | 0 (0-0)                      | 0 (0-0)                           |
| 2000 | Australia           | 1 (0-1)                   |                                | 0 (0-0)                           |                                        | 1 (1-2)                    |                                 | 0 (0-0)                            |                                         | 0 (0-0)              |                           | 0 (0-0)                      |                                   |
| 2001 | Australia           | 1 (1-1)                   |                                | 0 (0-0)                           |                                        | 2 (1-3)                    |                                 | 0 (0-0)                            |                                         | 0 (0-0)              |                           | 0 (0-0)                      |                                   |
| 2002 | Australia           | 0 (0-0)                   |                                | 0 (0-0)                           |                                        | 0 (0-0)                    |                                 | 0 (0-0)                            |                                         | 0 (0-0)              |                           | 0 (0-0)                      |                                   |
| 2003 | Australia           | 0 (0-0)                   |                                | 0 (0-0)                           |                                        | 0 (0-0)                    |                                 | 0 (0-0)                            |                                         | 0 (0-0)              |                           | 0 (0-0)                      |                                   |
| 2004 | Australia           | 0 (0-0)                   |                                | 0 (0-0)                           |                                        | 0 (0-0)                    |                                 | 0 (0-0)                            |                                         | 0 (0-0)              |                           | 0 (0-0)                      |                                   |
| 2005 | Australia           | 0 (0-0)                   |                                | 0 (0-0)                           |                                        | 0 (0-0)                    |                                 | 0 (0-0)                            |                                         | 0 (0-0)              |                           | 0 (0-0)                      |                                   |
| 2006 | Australia           | 0 (0-0)                   |                                | 0 (0-0)                           |                                        | 0 (0-0)                    |                                 | 0 (0-0)                            |                                         | 0 (0-0)              |                           | 0 (0-0)                      |                                   |
| 2007 | Australia           | 0 (0-0)                   |                                | 0 (0-0)                           |                                        | 0 (0-0)                    |                                 | 0 (0-0)                            |                                         | 0 (0-0)              |                           | 0 (0-0)                      |                                   |
| 2008 | Australia           | 0 (0-0)                   |                                | 0 (0-0)                           |                                        | 0 (0-0)                    |                                 | 0 (0-0)                            |                                         | 0 (0-0)              |                           | 0 (0-0)                      |                                   |
| 2009 | Australia           | 0 (0-0)                   |                                | 0 (0-0)                           |                                        | 0 (0-0)                    |                                 | 0 (0-0)                            |                                         | 0 (0-0)              |                           | 0 (0-0)                      |                                   |
| 2010 | Australia           | 0 (0-0)                   |                                | 0 (0-0)                           |                                        | 0 (0-0)                    |                                 | 0 (0-0)                            |                                         | 0 (0-0)              |                           | 0 (0-0)                      |                                   |
| 2011 | Australia           | 0 (0-0)                   |                                | 0 (0-0)                           |                                        | 0 (0-0)                    |                                 | 0 (0-0)                            |                                         | 0 (0-0)              |                           | 0 (0-0)                      |                                   |
| 2012 | Australia           | 0 (0-0)                   |                                | 0 (0-0)                           |                                        | 0 (0-0)                    |                                 | 0 (0-0)                            |                                         | 0 (0-0)              |                           | 0 (0-0)                      |                                   |
| 2013 | Australia           | 0 (0-0)                   |                                | 0 (0-0)                           |                                        | 0 (0-0)                    |                                 | 0 (0-0)                            |                                         | 0 (0-0)              |                           | 0 (0-0)                      |                                   |
| 2014 | Australia           | 0 (0-0)                   |                                | 0 (0-0)                           |                                        | 0 (0-0)                    |                                 | 0 (0-0)                            |                                         | 0 (0-0)              |                           | 0 (0-0)                      |                                   |
| 2015 | Australia           | 0 (0-0)                   | 0 (0-0)                        | 0 (0-0)                           | 0 (0-0)                                | 0 (0-0)                    | 0 (0-0)                         | 0 (0-0)                            | 0 (0-0)                                 | 0 (0-0)              | 0 (0-0)                   | 0 (0-0)                      | 0 (0-0)                           |
| 2000 | Austria             | 0 (0-0)                   |                                | 0 (0-0)                           |                                        | 0 (0-0)                    |                                 | 0 (0-0)                            |                                         | 0 (0-0)              |                           | 0 (0-0)                      |                                   |
| 2001 | Austria             | 0 (0-0)                   |                                | 0 (0-0)                           |                                        | 0 (0-0)                    |                                 | 0 (0-0)                            |                                         | 0 (0-0)              |                           | 0 (0-0)                      |                                   |
| 2002 | Austria             | 0 (0-0)                   |                                | 0 (0-0)                           |                                        | 0 (0-0)                    |                                 | 0 (0-0)                            |                                         | 0 (0-0)              |                           | 0 (0-0)                      |                                   |
| 2003 | Austria             | 0 (0-0)                   |                                | 0 (0-0)                           |                                        | 0 (0-0)                    |                                 | 0 (0-0)                            |                                         | 0 (0-0)              |                           | 0 (0-0)                      |                                   |
| 2004 | Austria             | 0 (0-0)                   |                                | 0 (0-0)                           |                                        | 0 (0-0)                    |                                 | 0 (0-0)                            |                                         | 0 (0-0)              |                           | 0 (0-0)                      |                                   |
| 2005 | Austria             | 0 (0-0)                   |                                | 0 (0-0)                           |                                        | 0 (0-0)                    |                                 | 0 (0-0)                            |                                         | 0 (0-0)              |                           | 0 (0-0)                      |                                   |
| 2006 | Austria             | 0 (0-0)                   |                                | 0 (0-0)                           |                                        | 0 (0-0)                    |                                 | 0 (0-0)                            |                                         | 0 (0-0)              |                           | 0 (0-0)                      |                                   |
| 2007 | Austria             | 0 (0-0)                   |                                | 0 (0-0)                           |                                        | 0 (0-0)                    |                                 | 0 (0-0)                            |                                         | 0 (0-0)              |                           | 0 (0-0)                      |                                   |
| 2008 | Austria             | 0 (0-0)                   |                                | 0 (0-0)                           |                                        | 0 (0-0)                    |                                 | 0 (0-0)                            |                                         | 0 (0-0)              |                           | 0 (0-0)                      |                                   |
| 2009 | Austria             | 0 (0-0)                   |                                | 0 (0-0)                           |                                        | 0 (0-0)                    |                                 | 0 (0-0)                            |                                         | 0 (0-0)              |                           | 0 (0-0)                      |                                   |
| 2010 | Austria             | 0 (0-0)                   |                                | 0 (0-0)                           |                                        | 0 (0-0)                    |                                 | 0 (0-0)                            |                                         | 0 (0-0)              |                           | 0 (0-0)                      |                                   |
| 2011 | Austria             | 0 (0-0)                   |                                | 0 (0-0)                           |                                        | 0 (0-0)                    |                                 | 0 (0-0)                            |                                         | 0 (0-0)              |                           | 0 (0-0)                      |                                   |
| 2012 | Austria             | 0 (0-0)                   |                                | 0 (0-0)                           |                                        | 0 (0-0)                    |                                 | 0 (0-0)                            |                                         | 0 (0-0)              |                           | 0 (0-0)                      |                                   |
| 2013 | Austria             | 0 (0-0)                   |                                | 0 (0-0)                           |                                        | 0 (0-0)                    |                                 | 0 (0-0)                            |                                         | 0 (0-0)              |                           | 0 (0-0)                      |                                   |
| 2014 | Austria             | 0 (0-0)                   |                                | 0 (0-0)                           |                                        | 0 (0-0)                    |                                 | 0 (0-0)                            |                                         | 0 (0-0)              |                           | 0 (0-0)                      |                                   |
| 2015 | Austria             | 0 (0-0)                   | 0 (0-0)                        | 0 (0-0)                           | 0 (0-0)                                | 0 (0-0)                    | 0 (0-0)                         | 0 (0-0)                            | 0 (0-0)                                 | 0 (0-0)              | 0 (0-0)                   | 0 (0-0)                      | 0 (0-0)                           |
| 2000 | Azerbaijan          | 281 (198-369)             |                                | 41 (29-54)                        |                                        | 86 (24-143)                |                                 | 13 (3-21)                          |                                         | 1 (0-1)              |                           | 0 (0-0)                      |                                   |
| 2001 | Azerbaijan          | 246 (173-323)             |                                | 38 (27-50)                        |                                        | 74 (21-122)                |                                 | 11 (3-19)                          |                                         | 1 (0-1)              |                           | 0 (0-0)                      |                                   |
| 2002 | Azerbaijan          | 219 (154-288)             |                                | 35 (25-46)                        |                                        | 64 (18-108)                |                                 | 10 (3-17)                          |                                         | 1 (0-1)              |                           | 0 (0-0)                      |                                   |
| 2003 | Azerbaijan          | 200 (141-263)             |                                | 33 (23-43)                        |                                        | 57 (16-94)                 |                                 | 9 (3-15)                           |                                         | 0 (0-1)              |                           | 0 (0-0)                      |                                   |
| 2004 | Azerbaijan          | 188 (132-248)             |                                | 31 (22-41)                        |                                        | 51 (15-85)                 |                                 | 9 (2-14)                           |                                         | 0 (0-1)              |                           | 0 (0-0)                      |                                   |
| 2005 | Azerbaijan          | 177 (125-233)             |                                | 29 (21-39)                        |                                        | 46 (13-76)                 |                                 | 8 (2-13)                           |                                         | 0 (0-1)              |                           | 0 (0-0)                      |                                   |
| 2006 | Azerbaijan          | 170 (119-223)             |                                | 28 (19-36)                        |                                        | 42 (12-69)                 |                                 | 7 (2-11)                           |                                         | 0 (0-1)              |                           | 0 (0-0)                      |                                   |
| 2007 | Azerbaijan          | 162 (114-213)             |                                | 26 (18-34)                        |                                        | 39 (11-63)                 |                                 | 6 (2-10)                           |                                         | 0 (0-1)              |                           | 0 (0-0)                      |                                   |
| 2008 | Azerbaijan          | 157 (110-206)             |                                | 24 (17-32)                        |                                        | 36 (11-59)                 |                                 | 6 (2-9)                            |                                         | 0 (0-0)              |                           | 0 (0-0)                      |                                   |
| 2009 | Azerbaijan          | 154 (108-202)             |                                | 23 (16-30)                        |                                        | 35 (10-57)                 |                                 | 5 (2-8)                            |                                         | 0 (0-0)              |                           | 0 (0-0)                      |                                   |
| 2010 | Azerbaijan          | 155 (109-204)             |                                | 22 (16-29)                        |                                        | 34 (10-56)                 |                                 | 5 (1-8)                            |                                         | 0 (0-0)              |                           | 0 (0-0)                      |                                   |
| 2011 | Azerbaijan          | 112 (79-147)              |                                | 15 (11-20)                        |                                        | 25 (7-40)                  |                                 | 3 (1-5)                            |                                         | 0 (0-0)              |                           | 0 (0-0)                      |                                   |
| 2012 | Azerbaijan          | 14 (10-18)                |                                | 2 (1-2)                           |                                        | 3 (1-5)                    |                                 | 0 (0-1)                            |                                         | 0 (0-0)              |                           | 0 (0-0)                      |                                   |
| 2013 | Azerbaijan          | 13 (9-17)                 |                                | 2 (1-2)                           |                                        | 3 (1-5)                    |                                 | 0 (0-1)                            |                                         | 0 (0-0)              |                           | 0 (0-0)                      |                                   |
| 2014 | Azerbaijan          | 13 (9-17)                 |                                | 1 (1-2)                           |                                        | 3 (1-5)                    |                                 | 0 (0-1)                            |                                         | 0 (0-0)              |                           | 0 (0-0)                      |                                   |

Hib = *Haemophilus influenzae* type b; npnm = non-pneumonia, non-meningitis; HIV = deaths only in HIV-infected children; Uncertainty range provided in parentheses.

| Year | Country    | Hib pneumonia deaths (UR) | Hib pneumonia deaths, HIV (UR) | Hib pneumonia mortality rate (UR) | Hib pneumonia mortality rate, HIV (UR) | Hib meningitis deaths (UR) | Hib meningitis deaths, HIV (UR) | Hib meningitis mortality rate (UR) | Hib meningitis mortality rate, HIV (UR) | Hib NPNM deaths (UR) | Hib NPNM deaths, HIV (UR) | Hib NPNM mortality rate (UR) | Hib NPNM mortality rate, HIV (UR) |
|------|------------|---------------------------|--------------------------------|-----------------------------------|----------------------------------------|----------------------------|---------------------------------|------------------------------------|-----------------------------------------|----------------------|---------------------------|------------------------------|-----------------------------------|
| 2015 | Azerbaijan | 12 (9-16)                 | 0 (0-0)                        | 0 (0-0)                           | 1 (1-2)                                | 0 (0-0)                    | 3 (1-4)                         | 0 (0-0)                            | 0 (0-0)                                 | 0 (0-0)              | 0 (0-0)                   | 0 (0-0)                      | 0 (0-0)                           |
| 2000 | Bahamas    | 0 (0-0)                   | 0 (0-0)                        | 0 (0-0)                           | 1 (0-1)                                | 0 (0-0)                    | 0 (0-0)                         | 0 (0-0)                            | 0 (0-0)                                 | 0 (0-0)              | 0 (0-0)                   | 0 (0-0)                      | 0 (0-0)                           |
| 2001 | Bahamas    | 0 (0-0)                   | 0 (0-0)                        | 0 (0-0)                           | 0 (0-1)                                | 0 (0-0)                    | 0 (0-0)                         | 0 (0-0)                            | 0 (0-0)                                 | 0 (0-0)              | 0 (0-0)                   | 0 (0-0)                      | 0 (0-0)                           |
| 2002 | Bahamas    | 0 (0-0)                   | 0 (0-0)                        | 0 (0-0)                           | 0 (0-1)                                | 0 (0-0)                    | 0 (0-0)                         | 0 (0-0)                            | 0 (0-0)                                 | 0 (0-0)              | 0 (0-0)                   | 0 (0-0)                      | 0 (0-0)                           |
| 2003 | Bahamas    | 0 (0-0)                   | 0 (0-0)                        | 0 (0-0)                           | 0 (0-0)                                | 0 (0-0)                    | 0 (0-0)                         | 0 (0-0)                            | 0 (0-0)                                 | 0 (0-0)              | 0 (0-0)                   | 0 (0-0)                      | 0 (0-0)                           |
| 2004 | Bahamas    | 0 (0-0)                   | 0 (0-0)                        | 0 (0-0)                           | 0 (0-0)                                | 0 (0-0)                    | 0 (0-0)                         | 0 (0-0)                            | 0 (0-0)                                 | 0 (0-0)              | 0 (0-0)                   | 0 (0-0)                      | 0 (0-0)                           |
| 2005 | Bahamas    | 0 (0-0)                   | 0 (0-0)                        | 0 (0-0)                           | 0 (0-0)                                | 0 (0-0)                    | 0 (0-0)                         | 0 (0-0)                            | 0 (0-0)                                 | 0 (0-0)              | 0 (0-0)                   | 0 (0-0)                      | 0 (0-0)                           |
| 2006 | Bahamas    | 0 (0-0)                   | 0 (0-0)                        | 0 (0-0)                           | 0 (0-0)                                | 0 (0-0)                    | 0 (0-0)                         | 0 (0-0)                            | 0 (0-0)                                 | 0 (0-0)              | 0 (0-0)                   | 0 (0-0)                      | 0 (0-0)                           |
| 2007 | Bahamas    | 0 (0-0)                   | 0 (0-0)                        | 0 (0-0)                           | 0 (0-0)                                | 0 (0-0)                    | 0 (0-0)                         | 0 (0-0)                            | 0 (0-0)                                 | 0 (0-0)              | 0 (0-0)                   | 0 (0-0)                      | 0 (0-0)                           |
| 2008 | Bahamas    | 0 (0-0)                   | 0 (0-0)                        | 0 (0-0)                           | 0 (0-0)                                | 0 (0-0)                    | 0 (0-0)                         | 0 (0-0)                            | 0 (0-0)                                 | 0 (0-0)              | 0 (0-0)                   | 0 (0-0)                      | 0 (0-0)                           |
| 2009 | Bahamas    | 0 (0-0)                   | 0 (0-0)                        | 0 (0-0)                           | 0 (0-0)                                | 0 (0-0)                    | 0 (0-0)                         | 0 (0-0)                            | 0 (0-0)                                 | 0 (0-0)              | 0 (0-0)                   | 0 (0-0)                      | 0 (0-0)                           |
| 2010 | Bahamas    | 0 (0-0)                   | 0 (0-0)                        | 0 (0-0)                           | 0 (0-0)                                | 0 (0-0)                    | 0 (0-0)                         | 0 (0-0)                            | 0 (0-0)                                 | 0 (0-0)              | 0 (0-0)                   | 0 (0-0)                      | 0 (0-0)                           |
| 2011 | Bahamas    | 0 (0-0)                   | 0 (0-0)                        | 0 (0-0)                           | 0 (0-0)                                | 0 (0-0)                    | 0 (0-0)                         | 0 (0-0)                            | 0 (0-0)                                 | 0 (0-0)              | 0 (0-0)                   | 0 (0-0)                      | 0 (0-0)                           |
| 2012 | Bahamas    | 0 (0-0)                   | 0 (0-0)                        | 0 (0-0)                           | 0 (0-0)                                | 0 (0-0)                    | 0 (0-0)                         | 0 (0-0)                            | 0 (0-0)                                 | 0 (0-0)              | 0 (0-0)                   | 0 (0-0)                      | 0 (0-0)                           |
| 2013 | Bahamas    | 0 (0-0)                   | 0 (0-0)                        | 0 (0-0)                           | 0 (0-0)                                | 0 (0-0)                    | 0 (0-0)                         | 0 (0-0)                            | 0 (0-0)                                 | 0 (0-0)              | 0 (0-0)                   | 0 (0-0)                      | 0 (0-0)                           |
| 2014 | Bahamas    | 0 (0-0)                   | 0 (0-0)                        | 0 (0-0)                           | 0 (0-0)                                | 0 (0-0)                    | 0 (0-0)                         | 0 (0-0)                            | 0 (0-0)                                 | 0 (0-0)              | 0 (0-0)                   | 0 (0-0)                      | 0 (0-0)                           |
| 2015 | Bahamas    | 0 (0-0)                   | 0 (0-0)                        | 0 (0-0)                           | 0 (0-0)                                | 0 (0-0)                    | 0 (0-0)                         | 0 (0-0)                            | 0 (0-0)                                 | 0 (0-0)              | 0 (0-0)                   | 0 (0-0)                      | 0 (0-0)                           |
| 2000 | Bahrain    | 0 (0-0)                   | 0 (0-0)                        | 0 (0-0)                           | 0 (0-0)                                | 0 (0-0)                    | 0 (0-0)                         | 0 (0-0)                            | 0 (0-0)                                 | 0 (0-0)              | 0 (0-0)                   | 0 (0-0)                      | 0 (0-0)                           |
| 2001 | Bahrain    | 0 (0-0)                   | 0 (0-0)                        | 0 (0-0)                           | 0 (0-0)                                | 0 (0-0)                    | 0 (0-0)                         | 0 (0-0)                            | 0 (0-0)                                 | 0 (0-0)              | 0 (0-0)                   | 0 (0-0)                      | 0 (0-0)                           |
| 2002 | Bahrain    | 0 (0-0)                   | 0 (0-0)                        | 0 (0-0)                           | 0 (0-0)                                | 0 (0-0)                    | 0 (0-0)                         | 0 (0-0)                            | 0 (0-0)                                 | 0 (0-0)              | 0 (0-0)                   | 0 (0-0)                      | 0 (0-0)                           |
| 2003 | Bahrain    | 0 (0-0)                   | 0 (0-0)                        | 0 (0-0)                           | 0 (0-0)                                | 0 (0-0)                    | 0 (0-0)                         | 0 (0-0)                            | 0 (0-0)                                 | 0 (0-0)              | 0 (0-0)                   | 0 (0-0)                      | 0 (0-0)                           |
| 2004 | Bahrain    | 0 (0-0)                   | 0 (0-0)                        | 0 (0-0)                           | 0 (0-0)                                | 0 (0-0)                    | 0 (0-0)                         | 0 (0-0)                            | 0 (0-0)                                 | 0 (0-0)              | 0 (0-0)                   | 0 (0-0)                      | 0 (0-0)                           |
| 2005 | Bahrain    | 0 (0-0)                   | 0 (0-0)                        | 0 (0-0)                           | 0 (0-0)                                | 0 (0-0)                    | 0 (0-0)                         | 0 (0-0)                            | 0 (0-0)                                 | 0 (0-0)              | 0 (0-0)                   | 0 (0-0)                      | 0 (0-0)                           |
| 2006 | Bahrain    | 0 (0-0)                   | 0 (0-0)                        | 0 (0-0)                           | 0 (0-0)                                | 0 (0-0)                    | 0 (0-0)                         | 0 (0-0)                            | 0 (0-0)                                 | 0 (0-0)              | 0 (0-0)                   | 0 (0-0)                      | 0 (0-0)                           |
| 2007 | Bahrain    | 0 (0-0)                   | 0 (0-0)                        | 0 (0-0)                           | 0 (0-0)                                | 0 (0-0)                    | 0 (0-0)                         | 0 (0-0)                            | 0 (0-0)                                 | 0 (0-0)              | 0 (0-0)                   | 0 (0-0)                      | 0 (0-0)                           |
| 2008 | Bahrain    | 0 (0-0)                   | 0 (0-0)                        | 0 (0-0)                           | 0 (0-0)                                | 0 (0-0)                    | 0 (0-0)                         | 0 (0-0)                            | 0 (0-0)                                 | 0 (0-0)              | 0 (0-0)                   | 0 (0-0)                      | 0 (0-0)                           |
| 2009 | Bahrain    | 0 (0-0)                   | 0 (0-0)                        | 0 (0-0)                           | 0 (0-0)                                | 8 (0-0)                    | 0 (0-0)                         | 0 (0-0)                            | 0 (0-0)                                 | 0 (0-0)              | 0 (0-0)                   | 0 (0-0)                      | 0 (0-0)                           |
| 2010 | Bahrain    | 0 (0-0)                   | 0 (0-0)                        | 0 (0-0)                           | 0 (0-0)                                | 0 (0-0)                    | 0 (0-0)                         | 0 (0-0)                            | 0 (0-0)                                 | 0 (0-0)              | 0 (0-0)                   | 0 (0-0)                      | 0 (0-0)                           |
| 2011 | Bahrain    | 0 (0-0)                   | 0 (0-0)                        | 0 (0-0)                           | 0 (0-0)                                | 0 (0-0)                    | 0 (0-0)                         | 0 (0-0)                            | 0 (0-0)                                 | 0 (0-0)              | 0 (0-0)                   | 0 (0-0)                      | 0 (0-0)                           |
| 2012 | Bahrain    | 0 (0-0)                   | 0 (0-0)                        | 0 (0-0)                           | 0 (0-0)                                | 0 (0-0)                    | 0 (0-0)                         | 0 (0-0)                            | 0 (0-0)                                 | 0 (0-0)              | 0 (0-0)                   | 0 (0-0)                      | 0 (0-0)                           |
| 2013 | Bahrain    | 0 (0-0)                   | 0 (0-0)                        | 0 (0-0)                           | 0 (0-0)                                | 0 (0-0)                    | 0 (0-0)                         | 0 (0-0)                            | 0 (0-0)                                 | 0 (0-0)              | 0 (0-0)                   | 0 (0-0)                      | 0 (0-0)                           |
| 2014 | Bahrain    | 0 (0-0)                   | 0 (0-0)                        | 0 (0-0)                           | 0 (0-0)                                | 0 (0-0)                    | 0 (0-0)                         | 0 (0-0)                            | 0 (0-0)                                 | 0 (0-0)              | 0 (0-0)                   | 0 (0-0)                      | 0 (0-0)                           |
| 2015 | Bahrain    | 0 (0-0)                   | 0 (0-0)                        | 0 (0-0)                           | 0 (0-0)                                | 0 (0-0)                    | 0 (0-0)                         | 0 (0-0)                            | 0 (0-0)                                 | 0 (0-0)              | 0 (0-0)                   | 0 (0-0)                      | 0 (0-0)                           |
| 2000 | Bangladesh | 7626 (5363-10020)         | 46 (33-61)                     | 46 (33-61)                        | 3156 (914-5108)                        | 19 (6-31)                  | 13 (4-21)                       | 13 (4-21)                          | 0 (0-0)                                 | 0 (0-0)              | 0 (0-0)                   | 0 (0-0)                      | 0 (0-0)                           |
| 2001 | Bangladesh | 7218 (5077-9484)          | 43 (31-57)                     | 43 (31-57)                        | 2960 (847-4800)                        | 18 (5-29)                  | 12 (3-20)                       | 12 (3-20)                          | 0 (0-0)                                 | 0 (0-0)              | 0 (0-0)                   | 0 (0-0)                      | 0 (0-0)                           |
| 2002 | Bangladesh | 6524 (4588-8572)          | 39 (28-52)                     | 39 (28-52)                        | 2649 (749-4303)                        | 16 (5-26)                  | 11 (3-18)                       | 11 (3-18)                          | 0 (0-0)                                 | 0 (0-0)              | 0 (0-0)                   | 0 (0-0)                      | 0 (0-0)                           |
| 2003 | Bangladesh | 6081 (4277-7990)          | 37 (26-48)                     | 37 (26-48)                        | 2444 (605-4099)                        | 15 (4-25)                  | 20 (5-33)                       | 20 (5-33)                          | 0 (0-0)                                 | 0 (0-0)              | 0 (0-0)                   | 0 (0-0)                      | 0 (0-0)                           |
| 2004 | Bangladesh | 5644 (3970-7416)          | 34 (24-45)                     | 34 (24-45)                        | 2244 (549-3772)                        | 14 (3-23)                  | 16 (4-30)                       | 16 (4-30)                          | 0 (0-0)                                 | 0 (0-0)              | 0 (0-0)                   | 0 (0-0)                      | 0 (0-0)                           |
| 2005 | Bangladesh | 5342 (3757-7019)          | 33 (23-43)                     | 33 (23-43)                        | 2099 (532-3508)                        | 13 (3-21)                  | 17 (4-28)                       | 17 (4-28)                          | 0 (0-0)                                 | 0 (0-0)              | 0 (0-0)                   | 0 (0-0)                      | 0 (0-0)                           |
| 2006 | Bangladesh | 4889 (3438-6424)          | 30 (21-39)                     | 30 (21-39)                        | 1893 (498-3147)                        | 12 (3-19)                  | 15 (4-25)                       | 15 (4-25)                          | 0 (0-0)                                 | 0 (0-0)              | 0 (0-0)                   | 0 (0-0)                      | 0 (0-0)                           |
| 2007 | Bangladesh | 4452 (3132-5850)          | 28 (19-36)                     | 28 (19-36)                        | 1700 (472-2800)                        | 11 (3-17)                  | 14 (4-22)                       | 14 (4-22)                          | 0 (0-0)                                 | 0 (0-0)              | 0 (0-0)                   | 0 (0-0)                      | 0 (0-0)                           |
| 2008 | Bangladesh | 4023 (2829-5286)          | 25 (18-33)                     | 25 (18-33)                        | 1514 (419-2497)                        | 10 (3-16)                  | 12 (3-20)                       | 12 (3-20)                          | 0 (0-0)                                 | 0 (0-0)              | 0 (0-0)                   | 0 (0-0)                      | 0 (0-0)                           |
| 2009 | Bangladesh | 553 (389-727)             | 4 (2-5)                        | 4 (2-5)                           | 205 (57-339)                           | 1 (0-2)                    | 2 (0-3)                         | 2 (0-3)                            | 0 (0-0)                                 | 0 (0-0)              | 0 (0-0)                   | 0 (0-0)                      | 0 (0-0)                           |
| 2010 | Bangladesh | 248 (174-325)             | 2 (1-2)                        | 2 (1-2)                           | 90 (25-150)                            | 1 (0-1)                    | 1 (0-1)                         | 1 (0-1)                            | 0 (0-0)                                 | 0 (0-0)              | 0 (0-0)                   | 0 (0-0)                      | 0 (0-0)                           |
| 2011 | Bangladesh | 264 (186-347)             | 2 (1-2)                        | 2 (1-2)                           | 95 (26-158)                            | 1 (0-1)                    | 1 (0-1)                         | 1 (0-1)                            | 0 (0-0)                                 | 0 (0-0)              | 0 (0-0)                   | 0 (0-0)                      | 0 (0-0)                           |
| 2012 | Bangladesh | 211 (149-278)             | 1 (1-2)                        | 1 (1-2)                           | 76 (21-125)                            | 1 (0-1)                    | 1 (0-1)                         | 1 (0-1)                            | 0 (0-0)                                 | 0 (0-0)              | 0 (0-0)                   | 0 (0-0)                      | 0 (0-0)                           |
| 2013 | Bangladesh | 195 (137-257)             | 1 (1-2)                        | 1 (1-2)                           | 69 (19-115)                            | 1 (0-1)                    | 1 (0-1)                         | 1 (0-1)                            | 0 (0-0)                                 | 0 (0-0)              | 0 (0-0)                   | 0 (0-0)                      | 0 (0-0)                           |
| 2014 | Bangladesh | 25 (17-32)                | 0 (0-0)                        | 0 (0-0)                           | 9 (3-14)                               | 0 (0-0)                    | 0 (0-0)                         | 0 (0-0)                            | 0 (0-0)                                 | 0 (0-0)              | 0 (0-0)                   | 0 (0-0)                      | 0 (0-0)                           |
| 2015 | Bangladesh | 23 (16-30)                | 0 (0-0)                        | 0 (0-0)                           | 8 (2-13)                               | 0 (0-0)                    | 0 (0-0)                         | 0 (0-0)                            | 0 (0-0)                                 | 0 (0-0)              | 0 (0-0)                   | 0 (0-0)                      | 0 (0-0)                           |
| 2000 | Barbados   | 0 (0-0)                   | 0 (0-0)                        | 0 (0-0)                           | 0 (0-1)                                | 3 (1-5)                    | 0 (0-0)                         | 0 (0-0)                            | 0 (0-0)                                 | 0 (0-0)              | 0 (0-0)                   | 0 (0-0)                      | 0 (0-0)                           |
| 2001 | Barbados   | 0 (0-0)                   | 0 (0-0)                        | 0 (0-0)                           | 1 (1-1)                                | 0 (0-1)                    | 0 (0-0)                         | 0 (0-0)                            | 0 (0-0)                                 | 0 (0-0)              | 0 (0-0)                   | 0 (0-0)                      | 0 (0-0)                           |
| 2002 | Barbados   | 0 (0-0)                   | 0 (0-0)                        | 0 (0-0)                           | 0 (0-0)                                | 0 (0-0)                    | 0 (0-0)                         | 0 (0-0)                            | 0 (0-0)                                 | 0 (0-0)              | 0 (0-0)                   | 0 (0-0)                      | 0 (0-0)                           |
| 2003 | Barbados   | 0 (0-0)                   | 0 (0-0)                        | 0 (0-0)                           | 0 (0-0)                                | 0 (0-0)                    | 0 (0-0)                         | 0 (0-0)                            | 0 (0-0)                                 | 0 (0-0)              | 0 (0-0)                   | 0 (0-0)                      | 0 (0-0)                           |
| 2004 | Barbados   | 0 (0-0)                   | 0 (0-0)                        | 0 (0-0)                           | 0 (0-0)                                | 0 (0-0)                    | 0 (0-0)                         | 0 (0-0)                            | 0 (0-0)                                 | 0 (0-0)              | 0 (0-0)                   | 0 (0-0)                      | 0 (0-0)                           |
| 2005 | Barbados   | 0 (0-0)                   | 0 (0-0)                        | 0 (0-0)                           | 0 (0-0)                                | 0 (0-0)                    | 0 (0-0)                         | 0 (0-0)                            | 0 (0-0)                                 | 0 (0-0)              | 0 (0-0)                   | 0 (0-0)                      | 0 (0-0)                           |
| 2006 | Barbados   | 0 (0-0)                   | 0 (0-0)                        | 0 (0-0)                           | 0 (0-0)                                | 0 (0-0)                    | 0 (0-0)                         | 0 (0-0)                            | 0 (0-0)                                 | 0 (0-0)              | 0 (0-0)                   | 0 (0-0)                      | 0 (0-0)                           |
| 2007 | Barbados   | 0 (0-0)                   | 0 (0-0)                        | 0 (0-0)                           | 0 (0-0)                                | 0 (0-0)                    | 0 (0-0)                         | 0 (0-0)                            | 0 (0-0)                                 | 0 (0-0)              | 0 (0-0)                   | 0 (0-0)                      | 0 (0-0)                           |
| 2008 | Barbados   | 0 (0-0)                   | 0 (0-0)                        | 0 (0-0)                           | 0 (0-0)                                | 0 (0-0)                    | 0 (0-0)                         | 0 (0-0)                            | 0 (0-0)                                 | 0 (0-0)              | 0 (0-0)                   | 0 (0-0)                      | 0 (0-0)                           |
| 2009 | Barbados   | 0 (0-0)                   | 0 (0-0)                        | 0 (0-0)                           | 0 (0-0)                                | 0 (0-0)                    | 0 (0-0)                         | 0 (0-0)                            | 0 (0-0)                                 | 0 (0-0)              | 0 (0-0)                   | 0 (0-0)                      | 0 (0-0)                           |
| 2010 | Barbados   | 0 (0-0)                   | 0 (0-0)                        | 0 (0-0)                           | 0 (0-0)                                | 0 (0-0)                    | 0 (0-0)                         | 0 (0-0)                            | 0 (0-0)                                 | 0 (0-0)              | 0 (0-0)                   | 0 (0-0)                      | 0 (0-0)                           |
| 2011 | Barbados   | 0 (0-0)                   | 0 (0-0)                        | 0 (0-0)                           | 0 (0-0)                                | 0 (0-0)                    | 0 (0-0)                         | 0 (0-0)                            | 0 (0-0)                                 | 0 (0-0)              | 0 (0-0)                   | 0 (0-0)                      | 0 (0-0)                           |
| 2012 | Barbados   | 0 (0-0)                   | 0 (0-0)                        | 0 (0-0)                           | 0 (0-0)                                | 0 (0-0)                    | 0 (0-0)                         | 0 (0-0)                            | 0 (0-0)                                 | 0 (0-0)              | 0 (0-0)                   | 0 (0-0)                      | 0 (0-0)                           |
| 2013 | Barbados   | 0 (0-0)                   | 0 (0-0)                        | 0 (0-0)                           | 0 (0-0)                                | 0 (0-0)                    | 0 (0-0)                         | 0 (0-0)                            | 0 (0-0)                                 | 0 (0-0)              | 0 (0-0)                   | 0 (0-0)                      | 0 (0-0)                           |
| 2014 | Barbados   | 0 (0-0)                   | 0 (0-0)                        | 0 (0-0)                           | 0 (0-0)                                | 0 (0-0)                    | 0 (0-0)                         | 0 (0-0)                            | 0 (0-0)                                 | 0 (0-0)              | 0 (0-0)                   | 0 (0-0)                      | 0 (0-0)                           |
| 2015 | Barbados   | 0 (0-0)                   | 0 (0-0)                        | 0 (0-0)                           | 0 (0-0)                                | 0 (0-0)                    | 0 (0-0)                         | 0 (0-0)                            | 0 (0-0)                                 | 0 (0-0)              | 0 (0-0)                   | 0 (0-0)                      | 0 (0-0)                           |
| 2000 | Belarus    | 22 (15-29)                | 5 (3-6)                        | 5 (3-6)                           | 6 (1-12)                               | 1 (0-3)                    | 0 (0-0)                         | 0 (0-0)                            | 0 (0-0)                                 | 0 (0-0)              | 0 (0-0)                   | 0 (0-0)                      | 0 (0-0)                           |
| 2001 | Belarus    | 19 (14-25)                | 4 (3-6)                        | 4 (3-6)                           | 5 (1-11)                               | 1 (0-2)                    | 0 (0-0)                         | 0 (0-0)                            | 0 (0-0)                                 | 0 (0-0)              | 0 (0-0)                   | 0 (0-0)                      | 0 (0-0)                           |
| 2002 | Belarus    | 17 (12-22)                | 4 (3-5)                        | 4 (3-5)                           | 5 (1-9)                                | 1 (0-2)                    | 0 (0-0)                         | 0 (0-0)                            | 0 (0-0)                                 | 0 (0-0)              | 0 (0-0)                   | 0 (0-0)                      | 0 (0-0)                           |
| 2003 | Belarus    | 15 (11-20)                | 4 (2-5)                        | 4 (2-5)                           | 4 (1-8)                                | 1 (0-2)                    | 0 (0-0)                         | 0 (0-0)                            | 0 (0-0)                                 | 0 (0-0)              | 0 (0-0)                   | 0 (0-0)                      | 0 (0-0)                           |
| 2004 | Belarus    | 14 (10-19)                | 3 (2-4)                        | 3 (2-4)                           | 4 (1-8)                                | 1 (0-2)                    | 0 (0-0)                         | 0 (0-0)                            | 0 (0-0)                                 | 0 (0-0)              | 0 (0-0)                   | 0 (0-0)                      | 0 (0-0)                           |
| 2005 | Belarus    | 13 (9-17)                 | 3 (2-4)                        | 3 (2-4)                           | 4 (1-7)                                | 1 (0-2)                    | 0 (0-0)                         | 0 (0-0)                            | 0 (0-0)                                 | 0 (0-0)              | 0 (0-0)                   | 0 (0-0)                      | 0 (0-0)                           |
| 2006 | Belarus    | 12 (9-16)                 | 3 (2-4)                        | 3 (2-4)                           | 4 (1-7)                                | 1 (0-2)                    | 0 (0-0)                         | 0 (0-0)                            | 0 (0-0)                                 | 0 (0-0)              | 0 (0-0)                   | 0 (0-0)                      | 0 (0-0)                           |
| 2007 | Belarus    | 11 (8-14)                 | 2 (2-3)                        | 2 (2-3)                           | 3 (1-6)                                | 1 (0-1)                    | 0 (0-0)                         | 0 (0-0)                            | 0 (0-0)                                 | 0 (0-0)              | 0 (0-0)                   | 0 (0-0)                      | 0 (0-0)                           |
| 2008 | Belarus    | 9 (6-12)                  | 2 (1-3)                        | 2 (1-3)                           | 3 (1-6)                                | 1 (0-1)                    | 0 (0-0)                         | 0 (0-0)                            | 0 (0-0)                                 | 0 (0-0)              | 0 (0-0)                   | 0 (0-0)                      | 0 (0-0)                           |
| 2009 | Belarus    | 6 (4-8)                   | 1 (1-2)                        | 1 (1-2)                           | 2 (1-4)                                | 1 (0-1)                    | 0 (0-0)                         | 0 (0-0)                            | 0 (0-0)                                 | 0 (0-0)              | 0 (0-0)                   | 0 (0-0)                      | 0 (0-0)                           |
| 2010 | Belarus    | 8 (5-10)                  |                                |                                   |                                        |                            |                                 |                                    |                                         |                      |                           |                              |                                   |

| Year | Country                          | Hib pneumonia deaths (UR) | Hib pneumonia deaths, HIV (UR) | Hib pneumonia mortality rate (UR) | Hib pneumonia mortality rate, HIV (UR) | Hib meningitis deaths (UR) | Hib meningitis deaths, HIV (UR) | Hib meningitis mortality rate (UR) | Hib meningitis mortality rate, HIV (UR) | Hib NPM deaths (UR) | Hib NPM deaths, HIV (UR) | Hib NPM mortality rate (UR) | Hib NPM mortality rate, HIV (UR) |
|------|----------------------------------|---------------------------|--------------------------------|-----------------------------------|----------------------------------------|----------------------------|---------------------------------|------------------------------------|-----------------------------------------|---------------------|--------------------------|-----------------------------|----------------------------------|
| 2007 | Belgium                          | 0 (0-0)                   |                                | 0 (0-0)                           |                                        | 0 (0-0)                    |                                 | 0 (0-0)                            |                                         | 0 (0-0)             |                          | 0 (0-0)                     |                                  |
| 2008 | Belgium                          | 0 (0-0)                   |                                | 0 (0-0)                           |                                        | 0 (0-0)                    |                                 | 0 (0-0)                            |                                         | 0 (0-0)             |                          | 0 (0-0)                     |                                  |
| 2009 | Belgium                          | 0 (0-0)                   |                                | 0 (0-0)                           |                                        | 0 (0-0)                    |                                 | 0 (0-0)                            |                                         | 0 (0-0)             |                          | 0 (0-0)                     |                                  |
| 2010 | Belgium                          | 0 (0-0)                   |                                | 0 (0-0)                           |                                        | 0 (0-0)                    |                                 | 0 (0-0)                            |                                         | 0 (0-0)             |                          | 0 (0-0)                     |                                  |
| 2011 | Belgium                          | 0 (0-0)                   |                                | 0 (0-0)                           |                                        | 0 (0-0)                    |                                 | 0 (0-0)                            |                                         | 0 (0-0)             |                          | 0 (0-0)                     |                                  |
| 2012 | Belgium                          | 0 (0-0)                   |                                | 0 (0-0)                           |                                        | 0 (0-0)                    |                                 | 0 (0-0)                            |                                         | 0 (0-0)             |                          | 0 (0-0)                     |                                  |
| 2013 | Belgium                          | 0 (0-0)                   |                                | 0 (0-0)                           |                                        | 0 (0-0)                    |                                 | 0 (0-0)                            |                                         | 0 (0-0)             |                          | 0 (0-0)                     |                                  |
| 2014 | Belgium                          | 0 (0-0)                   |                                | 0 (0-0)                           |                                        | 0 (0-0)                    |                                 | 0 (0-0)                            |                                         | 0 (0-0)             |                          | 0 (0-0)                     |                                  |
| 2015 | Belgium                          | 0 (0-0)                   | 0 (0-0)                        | 0 (0-0)                           | 0 (0-0)                                | 0 (0-0)                    | 0 (0-0)                         | 0 (0-0)                            | 0 (0-0)                                 | 0 (0-0)             | 0 (0-0)                  | 0 (0-0)                     | 0 (0-0)                          |
| 2000 | Belize                           | 4 (3-5)                   |                                | 11 (8-15)                         |                                        | 2 (0-4)                    |                                 | 6 (1-11)                           |                                         | 0 (0-0)             |                          | 0 (0-0)                     |                                  |
| 2001 | Belize                           | 1 (0-1)                   |                                | 2 (1-2)                           |                                        | 1 (0-1)                    |                                 | 2 (0-3)                            |                                         | 0 (0-0)             |                          | 0 (0-0)                     |                                  |
| 2002 | Belize                           | 0 (0-1)                   |                                | 0 (0-1)                           |                                        | 0 (0-1)                    |                                 | 1 (0-2)                            |                                         | 0 (0-0)             |                          | 0 (0-0)                     |                                  |
| 2003 | Belize                           | 0 (0-0)                   |                                | 1 (1-1)                           |                                        | 0 (0-0)                    |                                 | 0 (0-0)                            |                                         | 0 (0-0)             |                          | 0 (0-0)                     |                                  |
| 2004 | Belize                           | 0 (0-0)                   |                                | 1 (1-1)                           |                                        | 0 (0-0)                    |                                 | 1 (0-1)                            |                                         | 0 (0-0)             |                          | 0 (0-0)                     |                                  |
| 2005 | Belize                           | 0 (0-0)                   |                                | 0 (0-1)                           |                                        | 0 (0-0)                    |                                 | 0 (0-0)                            |                                         | 0 (0-0)             |                          | 0 (0-0)                     |                                  |
| 2006 | Belize                           | 0 (0-0)                   |                                | 0 (0-0)                           |                                        | 0 (0-0)                    |                                 | 0 (0-0)                            |                                         | 0 (0-0)             |                          | 0 (0-0)                     |                                  |
| 2007 | Belize                           | 0 (0-0)                   |                                | 0 (0-0)                           |                                        | 0 (0-0)                    |                                 | 0 (0-0)                            |                                         | 0 (0-0)             |                          | 0 (0-0)                     |                                  |
| 2008 | Belize                           | 0 (0-0)                   |                                | 0 (0-0)                           |                                        | 0 (0-0)                    |                                 | 0 (0-0)                            |                                         | 0 (0-0)             |                          | 0 (0-0)                     |                                  |
| 2009 | Belize                           | 0 (0-0)                   |                                | 0 (0-0)                           |                                        | 0 (0-0)                    |                                 | 0 (0-0)                            |                                         | 0 (0-0)             |                          | 0 (0-0)                     |                                  |
| 2010 | Belize                           | 0 (0-0)                   |                                | 0 (0-0)                           |                                        | 0 (0-0)                    |                                 | 0 (0-0)                            |                                         | 0 (0-0)             |                          | 0 (0-0)                     |                                  |
| 2011 | Belize                           | 0 (0-0)                   |                                | 0 (0-0)                           |                                        | 0 (0-0)                    |                                 | 0 (0-0)                            |                                         | 0 (0-0)             |                          | 0 (0-0)                     |                                  |
| 2012 | Belize                           | 0 (0-0)                   |                                | 0 (0-0)                           |                                        | 0 (0-0)                    |                                 | 0 (0-0)                            |                                         | 0 (0-0)             |                          | 0 (0-0)                     |                                  |
| 2013 | Belize                           | 0 (0-0)                   |                                | 0 (0-0)                           |                                        | 0 (0-0)                    |                                 | 0 (0-0)                            |                                         | 0 (0-0)             |                          | 0 (0-0)                     |                                  |
| 2014 | Belize                           | 0 (0-0)                   |                                | 0 (0-0)                           |                                        | 0 (0-0)                    |                                 | 0 (0-0)                            |                                         | 0 (0-0)             |                          | 0 (0-0)                     |                                  |
| 2015 | Belize                           | 0 (0-0)                   | 0 (0-0)                        | 0 (0-0)                           | 0 (0-0)                                | 0 (0-0)                    | 0 (0-0)                         | 0 (0-0)                            | 0 (0-0)                                 | 0 (0-0)             | 0 (0-0)                  | 0 (0-0)                     | 0 (0-0)                          |
| 2000 | Benin                            | 1014 (713-1333)           |                                | 83 (58-109)                       |                                        | 410 (126-871)              |                                 | 34 (10-55)                         |                                         | 2 (1-3)             |                          | 0 (0-0)                     |                                  |
| 2001 | Benin                            | 995 (700-1308)            |                                | 79 (56-104)                       |                                        | 400 (123-654)              |                                 | 32 (10-52)                         |                                         | 2 (1-3)             |                          | 0 (0-0)                     |                                  |
| 2002 | Benin                            | 989 (696-1299)            |                                | 77 (54-101)                       |                                        | 396 (122-647)              |                                 | 31 (9-50)                          |                                         | 2 (0-3)             |                          | 0 (0-0)                     |                                  |
| 2003 | Benin                            | 979 (688-1286)            |                                | 74 (52-97)                        |                                        | 391 (120-638)              |                                 | 29 (9-48)                          |                                         | 2 (0-3)             |                          | 0 (0-0)                     |                                  |
| 2004 | Benin                            | 963 (677-1265)            |                                | 71 (50-93)                        |                                        | 384 (118-627)              |                                 | 28 (9-46)                          |                                         | 2 (0-3)             |                          | 0 (0-0)                     |                                  |
| 2005 | Benin                            | 678 (477-890)             |                                | 49 (34-64)                        |                                        | 270 (83-440)               |                                 | 19 (6-32)                          |                                         | 1 (0-2)             |                          | 0 (0-0)                     |                                  |
| 2006 | Benin                            | 106 (74-139)              |                                | 7 (5-10)                          |                                        | 42 (13-88)                 |                                 | 3 (1-5)                            |                                         | 0 (0-0)             |                          | 0 (0-0)                     |                                  |
| 2007 | Benin                            | 94 (66-123)               |                                | 6 (4-8)                           |                                        | 37 (11-61)                 |                                 | 3 (1-4)                            |                                         | 0 (0-0)             |                          | 0 (0-0)                     |                                  |
| 2008 | Benin                            | 108 (76-142)              |                                | 7 (5-9)                           |                                        | 43 (13-70)                 |                                 | 3 (1-5)                            |                                         | 0 (0-0)             |                          | 0 (0-0)                     |                                  |
| 2009 | Benin                            | 103 (73-136)              |                                | 7 (5-9)                           |                                        | 41 (12-67)                 |                                 | 3 (1-4)                            |                                         | 0 (0-0)             |                          | 0 (0-0)                     |                                  |
| 2010 | Benin                            | 11 (7-14)                 |                                | 1 (0-1)                           |                                        | 4 (1-7)                    |                                 | 0 (0-0)                            |                                         | 0 (0-0)             |                          | 0 (0-0)                     |                                  |
| 2011 | Benin                            | 11 (8-14)                 |                                | 1 (0-1)                           |                                        | 4 (1-7)                    |                                 | 0 (0-0)                            |                                         | 0 (0-0)             |                          | 0 (0-0)                     |                                  |
| 2012 | Benin                            | 10 (7-14)                 |                                | 1 (0-1)                           |                                        | 4 (1-7)                    |                                 | 0 (0-0)                            |                                         | 0 (0-0)             |                          | 0 (0-0)                     |                                  |
| 2013 | Benin                            | 11 (7-14)                 |                                | 1 (0-1)                           |                                        | 4 (1-7)                    |                                 | 0 (0-0)                            |                                         | 0 (0-0)             |                          | 0 (0-0)                     |                                  |
| 2014 | Benin                            | 11 (7-14)                 |                                | 1 (0-1)                           |                                        | 4 (1-7)                    |                                 | 0 (0-0)                            |                                         | 0 (0-0)             |                          | 0 (0-0)                     |                                  |
| 2015 | Benin                            | 10 (7-14)                 | 0 (0-0)                        | 1 (0-1)                           | 0 (0-0)                                | 4 (1-7)                    | 0 (0-0)                         | 0 (0-0)                            | 0 (0-0)                                 | 0 (0-0)             | 0 (0-0)                  | 0 (0-0)                     | 0 (0-0)                          |
| 2000 | Bhutan                           | 37 (26-49)                |                                | 51 (36-66)                        |                                        | 12 (5-19)                  |                                 | 16 (6-25)                          |                                         | 0 (0-0)             |                          | 0 (0-0)                     |                                  |
| 2001 | Bhutan                           | 34 (24-45)                |                                | 46 (33-61)                        |                                        | 11 (4-17)                  |                                 | 15 (6-23)                          |                                         | 0 (0-0)             |                          | 0 (0-0)                     |                                  |
| 2002 | Bhutan                           | 31 (22-41)                |                                | 43 (30-56)                        |                                        | 10 (4-15)                  |                                 | 13 (5-21)                          |                                         | 0 (0-0)             |                          | 0 (0-0)                     |                                  |
| 2003 | Bhutan                           | 28 (20-37)                |                                | 39 (27-51)                        |                                        | 9 (3-14)                   |                                 | 12 (5-19)                          |                                         | 0 (0-0)             |                          | 0 (0-0)                     |                                  |
| 2004 | Bhutan                           | 25 (18-33)                |                                | 36 (25-47)                        |                                        | 8 (3-12)                   |                                 | 11 (4-17)                          |                                         | 0 (0-0)             |                          | 0 (0-0)                     |                                  |
| 2005 | Bhutan                           | 23 (16-30)                |                                | 33 (23-43)                        |                                        | 7 (3-11)                   |                                 | 10 (4-15)                          |                                         | 0 (0-0)             |                          | 0 (0-0)                     |                                  |
| 2006 | Bhutan                           | 21 (15-28)                |                                | 30 (21-39)                        |                                        | 6 (2-10)                   |                                 | 9 (3-14)                           |                                         | 0 (0-0)             |                          | 0 (0-0)                     |                                  |
| 2007 | Bhutan                           | 20 (14-26)                |                                | 28 (19-36)                        |                                        | 6 (2-9)                    |                                 | 8 (3-13)                           |                                         | 0 (0-0)             |                          | 0 (0-0)                     |                                  |
| 2008 | Bhutan                           | 18 (13-24)                |                                | 26 (18-34)                        |                                        | 5 (2-8)                    |                                 | 7 (3-11)                           |                                         | 0 (0-0)             |                          | 0 (0-0)                     |                                  |
| 2009 | Bhutan                           | 17 (12-22)                |                                | 23 (16-31)                        |                                        | 5 (2-7)                    |                                 | 7 (3-10)                           |                                         | 0 (0-0)             |                          | 0 (0-0)                     |                                  |
| 2010 | Bhutan                           | 15 (11-20)                |                                | 21 (15-28)                        |                                        | 4 (2-7)                    |                                 | 6 (2-9)                            |                                         | 0 (0-0)             |                          | 0 (0-0)                     |                                  |
| 2011 | Bhutan                           | 14 (10-18)                |                                | 19 (14-25)                        |                                        | 4 (2-6)                    |                                 | 5 (2-8)                            |                                         | 0 (0-0)             |                          | 0 (0-0)                     |                                  |
| 2012 | Bhutan                           | 2 (1-2)                   |                                | 3 (2-4)                           |                                        | 1 (0-1)                    |                                 | 1 (0-1)                            |                                         | 0 (0-0)             |                          | 0 (0-0)                     |                                  |
| 2013 | Bhutan                           | 1 (1-1)                   |                                | 1 (1-1)                           |                                        | 0 (0-0)                    |                                 | 0 (0-0)                            |                                         | 0 (0-0)             |                          | 0 (0-0)                     |                                  |
| 2014 | Bhutan                           | 1 (0-1)                   |                                | 1 (1-1)                           |                                        | 0 (0-0)                    |                                 | 0 (0-0)                            |                                         | 0 (0-0)             |                          | 0 (0-0)                     |                                  |
| 2015 | Bhutan                           | 1 (0-1)                   | 0 (0-0)                        | 1 (1-1)                           | 0 (0-0)                                | 0 (0-0)                    | 0 (0-0)                         | 0 (0-0)                            | 0 (0-0)                                 | 0 (0-0)             | 0 (0-0)                  | 0 (0-0)                     | 0 (0-0)                          |
| 2000 | Bolivia (Plurinational State of) | 118 (83-155)              |                                | 10 (7-14)                         |                                        | 37 (12-61)                 |                                 | 3 (1-5)                            |                                         | 0 (0-0)             |                          | 0 (0-0)                     |                                  |
| 2001 | Bolivia (Plurinational State of) | 57 (40-74)                |                                | 5 (3-6)                           |                                        | 18 (6-29)                  |                                 | 2 (0-3)                            |                                         | 0 (0-0)             |                          | 0 (0-0)                     |                                  |
| 2002 | Bolivia (Plurinational State of) | 52 (37-69)                |                                | 5 (3-6)                           |                                        | 17 (5-28)                  |                                 | 1 (0-2)                            |                                         | 0 (0-0)             |                          | 0 (0-0)                     |                                  |
| 2003 | Bolivia (Plurinational State of) | 46 (32-60)                |                                | 4 (3-5)                           |                                        | 15 (4-24)                  |                                 | 1 (0-2)                            |                                         | 0 (0-0)             |                          | 0 (0-0)                     |                                  |
| 2004 | Bolivia (Plurinational State of) | 39 (27-51)                |                                | 3 (2-4)                           |                                        | 12 (3-21)                  |                                 | 1 (0-2)                            |                                         | 0 (0-0)             |                          | 0 (0-0)                     |                                  |
| 2005 | Bolivia (Plurinational State of) | 4 (3-5)                   |                                | 0 (0-0)                           |                                        | 1 (0-2)                    |                                 | 0 (0-0)                            |                                         | 0 (0-0)             |                          | 0 (0-0)                     |                                  |
| 2006 | Bolivia (Plurinational State of) | 4 (3-5)                   |                                | 0 (0-0)                           |                                        | 1 (0-2)                    |                                 | 0 (0-0)                            |                                         | 0 (0-0)             |                          | 0 (0-0)                     |                                  |
| 2007 | Bolivia (Plurinational State of) | 3 (2-4)                   |                                | 0 (0-0)                           |                                        | 1 (0-2)                    |                                 | 0 (0-0)                            |                                         | 0 (0-0)             |                          | 0 (0-0)                     |                                  |
| 2008 | Bolivia (Plurinational State of) | 3 (2-4)                   |                                | 0 (0-0)                           |                                        | 1 (0-2)                    |                                 | 0 (0-0)                            |                                         | 0 (0-0)             |                          | 0 (0-0)                     |                                  |
| 2009 | Bolivia (Plurinational State of) | 3 (2-4)                   |                                | 0 (0-0)                           |                                        | 1 (0-1)                    |                                 | 0 (0-0)                            |                                         | 0 (0-0)             |                          | 0 (0-0)                     |                                  |
| 2010 | Bolivia (Plurinational State of) | 3 (2-4)                   |                                | 0 (0-0)                           |                                        | 1 (0-1)                    |                                 | 0 (0-0)                            |                                         | 0 (0-0)             |                          | 0 (0-0)                     |                                  |
| 2011 | Bolivia (Plurinational State of) | 3 (2-3)                   |                                | 0 (0-0)                           |                                        | 1 (0-1)                    |                                 | 0 (0-0)                            |                                         | 0 (0-0)             |                          | 0 (0-0)                     |                                  |
| 2012 | Bolivia (Plurinational State of) | 3 (2-3)                   |                                | 0 (0-0)                           |                                        | 1 (0-1)                    |                                 | 0 (0-0)                            |                                         | 0 (0-0)             |                          | 0 (0-0)                     |                                  |
| 2013 | Bolivia (Plurinational State of) | 2 (2-3)                   |                                | 0 (0-0)                           |                                        | 1 (0-1)                    |                                 | 0 (0-0)                            |                                         | 0 (0-0)             |                          | 0 (0-0)                     |                                  |
| 2014 | Bolivia (Plurinational State of) | 2 (2-3)                   |                                | 0 (0-0)                           |                                        | 1 (0-1)                    |                                 | 0 (0-0)                            |                                         | 0 (0-0)             |                          | 0 (0-0)                     |                                  |
| 2015 | Bolivia (Plurinational State of) | 2 (2-3)                   | 0 (0-0)                        | 0 (0-0)                           | 0 (0-0)                                | 1 (0-1)                    | 0 (0-0)                         | 0 (0-0)                            | 0 (0-0)                                 | 0 (0-0)             | 0 (0-0)                  | 0 (0-0)                     | 0 (0-0)                          |
| 2000 | Bosnia and Herzegovina           | 3 (2-4)                   |                                | 1 (1-2)                           |                                        | 1 (0-2)                    |                                 | 0 (0-1)                            |                                         | 0 (0-0)             |                          | 0 (0-0)                     |                                  |
| 2001 | Bosnia and Herzegovina           | 3 (2-3)                   |                                | 1 (1-2)                           |                                        | 1 (0-1)                    |                                 | 0 (0-1)                            |                                         | 0 (0-0)             |                          | 0 (0-0)                     |                                  |
| 2002 | Bosnia and Herzegovina           | 2 (2-3)                   |                                | 1 (1-1)                           |                                        | 1 (0-1)                    |                                 | 0 (0-1)                            |                                         | 0 (0-0)             |                          | 0 (0-0)                     |                                  |
| 2003 | Bosnia and Herzegovina           | 2 (1-3)                   |                                | 1 (1-1)                           |                                        | 1 (0-1)                    |                                 | 0 (0-0)                            |                                         | 0 (0-0)             |                          | 0 (0-0)                     |                                  |
| 2004 | Bosnia and Herzegovina           | 1 (1-1)                   |                                | 1 (0-1)                           |                                        | 0 (0-1)                    |                                 | 0 (0-0)                            |                                         | 0 (0-0)             |                          | 0 (0-0)                     |                                  |
| 2005 | Bosnia and Herzegovina           | 0 (0-0)                   |                                | 0 (0-0)                           |                                        | 0 (0-0)                    |                                 | 0 (0-0)                            |                                         | 0 (0-0)             |                          | 0 (0-0)                     |                                  |
| 2006 | Bosnia and Herzegovina           | 0 (0-0)                   |                                | 0 (0-0)                           |                                        | 0 (0-0)                    |                                 | 0 (0-0)                            |                                         | 0 (0-0)             |                          | 0 (0-0)                     |                                  |
| 2007 | Bosnia and Herzegovina           | 0 (0-0)                   |                                | 0 (0-0)                           |                                        | 0 (0-0)                    |                                 | 0 (0-0)                            |                                         | 0 (0-0)             |                          | 0 (0-0)                     |                                  |
| 2008 | Bosnia and Herzegovina           | 0 (0-0)                   |                                | 0 (0-0)                           |                                        | 0 (0-0)                    |                                 | 0 (0-0)                            |                                         | 0 (0-0)             |                          | 0 (0-0)                     |                                  |
| 2009 | Bosnia and Herzegovina           | 0 (0-0)                   |                                | 0 (0-0)                           |                                        | 0 (0-0)                    |                                 | 0 (0-0)                            |                                         | 0 (0-0)             |                          | 0 (0-0)                     |                                  |
| 2010 | Bosnia and Herzegovina           | 0 (0-0)                   |                                | 0 (0-0)                           |                                        | 0 (0-0)                    |                                 | 0 (0-0)                            |                                         | 0 (0-0)             |                          | 0 (0-0)                     |                                  |
| 2011 | Bosnia and Herzegovina           | 0 (0-0)                   |                                | 0 (0-0)                           |                                        | 0 (0-0)                    |                                 | 0 (0-0)                            |                                         | 0 (0-0)             |                          | 0 (0-0)                     |                                  |
| 2012 | Bosnia and Herzegovina           | 0 (0-0)                   |                                | 0 (0-0)                           |                                        | 0 (0-0)                    |                                 | 0 (0-0)                            |                                         | 0 (0-0)             |                          | 0 (0-0)                     |                                  |
| 2013 | Bosnia and Herzegovina           | 0 (0-0)                   |                                | 0 (0-0)                           |                                        | 0 (0-0)                    |                                 | 0 (0-0)                            |                                         | 0 (0-0)             |                          | 0 (0-0)                     |                                  |
| 2014 | Bosnia and Herzegovina           | 0 (0-0)                   |                                | 0 (0-0)                           |                                        | 0 (0-0)                    |                                 | 0 (0-0)                            |                                         | 0 (0-0)             |                          | 0 (0-0)                     |                                  |

Hib = *Haemophilus influenzae* type b; npnm = non-pneumonia, non-meningitis; HIV = deaths only in HIV-infected children; Uncertainty range provided in parentheses.

| Year | Country                | Hib pneumonia deaths | Hib pneumonia deaths, | Hib pneumonia       | Hib pneumonia            | Hib meningitis deaths | Hib meningitis deaths, | Hib meningitis mortality | Hib meningitis mortality | Hib NPNM deaths, HIV | Hib NPNM deaths, HIV | Hib NPNM mortality rate | Hib NPNM mortality |
|------|------------------------|----------------------|-----------------------|---------------------|--------------------------|-----------------------|------------------------|--------------------------|--------------------------|----------------------|----------------------|-------------------------|--------------------|
|      |                        | (UR)                 | HIV (UR)              | mortality rate (UR) | mortality rate, HIV (UR) | (UR)                  | HIV (UR)               | rate (UR)                | rate, HIV (UR)           |                      | (UR)                 | (UR)                    | (UR)               |
| 2015 | Bosnia and Herzegovina | 0 (0-0)              | 0 (0-0)               | 0 (0-0)             | 0 (0-0)                  | 0 (0-0)               | 0 (0-0)                | 0 (0-0)                  | 0 (0-0)                  | 0 (0-0)              | 0 (0-0)              | 0 (0-0)                 | 0 (0-0)            |
| 2000 | Botswana               | 39 (28-52)           |                       | 18 (13-24)          |                          | 9 (3-16)              |                        | 4 (1-7)                  |                          | 0 (0-0)              |                      | 0 (0-0)                 | 0 (0-0)            |
| 2001 | Botswana               | 40 (28-53)           |                       | 18 (13-24)          |                          | 10 (3-16)             |                        | 4 (1-7)                  |                          | 0 (0-0)              |                      | 0 (0-0)                 | 0 (0-0)            |
| 2002 | Botswana               | 41 (29-54)           |                       | 19 (13-25)          |                          | 10 (3-17)             |                        | 5 (1-8)                  |                          | 0 (0-0)              |                      | 0 (0-0)                 | 0 (0-0)            |
| 2003 | Botswana               | 43 (30-56)           |                       | 20 (14-26)          |                          | 10 (3-17)             |                        | 5 (1-8)                  |                          | 0 (0-0)              |                      | 0 (0-0)                 | 0 (0-0)            |
| 2004 | Botswana               | 45 (32-59)           |                       | 21 (14-27)          |                          | 11 (3-18)             |                        | 5 (1-8)                  |                          | 0 (0-0)              |                      | 0 (0-0)                 | 0 (0-0)            |
| 2005 | Botswana               | 46 (32-61)           |                       | 21 (15-28)          |                          | 11 (3-19)             |                        | 5 (1-8)                  |                          | 0 (0-0)              |                      | 0 (0-0)                 | 0 (0-0)            |
| 2006 | Botswana               | 49 (34-64)           |                       | 22 (16-29)          |                          | 11 (3-20)             |                        | 5 (1-9)                  |                          | 0 (0-0)              |                      | 0 (0-0)                 | 0 (0-0)            |
| 2007 | Botswana               | 53 (37-69)           |                       | 24 (17-31)          |                          | 12 (3-21)             |                        | 5 (1-9)                  |                          | 0 (0-0)              |                      | 0 (0-0)                 | 0 (0-0)            |
| 2008 | Botswana               | 55 (39-72)           |                       | 24 (17-32)          |                          | 12 (3-21)             |                        | 6 (1-9)                  |                          | 0 (0-0)              |                      | 0 (0-0)                 | 0 (0-0)            |
| 2009 | Botswana               | 55 (39-73)           |                       | 24 (17-32)          |                          | 12 (3-21)             |                        | 5 (1-9)                  |                          | 0 (0-0)              |                      | 0 (0-0)                 | 0 (0-0)            |
| 2010 | Botswana               | 55 (39-72)           |                       | 24 (17-31)          |                          | 12 (3-21)             |                        | 5 (1-9)                  |                          | 0 (0-0)              |                      | 0 (0-0)                 | 0 (0-0)            |
| 2011 | Botswana               | 9 (6-12)             |                       | 4 (3-5)             |                          | 2 (0-3)               |                        | 1 (0-1)                  |                          | 0 (0-0)              |                      | 0 (0-0)                 | 0 (0-0)            |
| 2012 | Botswana               | 4 (3-6)              |                       | 2 (1-2)             |                          | 1 (0-2)               |                        | 0 (0-1)                  |                          | 0 (0-0)              |                      | 0 (0-0)                 | 0 (0-0)            |
| 2013 | Botswana               | 4 (3-5)              |                       | 2 (1-2)             |                          | 1 (0-2)               |                        | 0 (0-1)                  |                          | 0 (0-0)              |                      | 0 (0-0)                 | 0 (0-0)            |
| 2014 | Botswana               | 4 (3-5)              |                       | 2 (1-2)             |                          | 1 (0-2)               |                        | 0 (0-1)                  |                          | 0 (0-0)              |                      | 0 (0-0)                 | 0 (0-0)            |
| 2015 | Botswana               | 4 (3-5)              | 0 (0-0)               | 2 (1-2)             | 0 (0-0)                  | 1 (0-2)               | 0 (0-0)                | 0 (0-1)                  | 0 (0-0)                  | 0 (0-0)              | 0 (0-0)              | 0 (0-0)                 | 0 (0-0)            |
| 2000 | Brazil                 | 463 (326-609)        |                       | 3 (2-4)             |                          | 310 (79-527)          |                        | 2 (0-3)                  |                          | 2 (1-4)              |                      | 0 (0-0)                 | 0 (0-0)            |
| 2001 | Brazil                 | 197 (139-259)        |                       | 1 (1-1)             |                          | 137 (12-243)          |                        | 1 (0-1)                  |                          | 1 (0-2)              |                      | 0 (0-0)                 | 0 (0-0)            |
| 2002 | Brazil                 | 172 (121-225)        |                       | 1 (1-1)             |                          | 107 (10-190)          |                        | 1 (0-1)                  |                          | 1 (0-2)              |                      | 0 (0-0)                 | 0 (0-0)            |
| 2003 | Brazil                 | 152 (107-200)        |                       | 1 (1-1)             |                          | 87 (8-154)            |                        | 0 (0-1)                  |                          | 1 (0-1)              |                      | 0 (0-0)                 | 0 (0-0)            |
| 2004 | Brazil                 | 136 (96-179)         |                       | 1 (1-1)             |                          | 79 (7-141)            |                        | 0 (0-1)                  |                          | 1 (0-1)              |                      | 0 (0-0)                 | 0 (0-0)            |
| 2005 | Brazil                 | 16 (11-21)           |                       | 0 (0-0)             |                          | 10 (1-18)             |                        | 0 (0-0)                  |                          | 0 (0-0)              |                      | 0 (0-0)                 | 0 (0-0)            |
| 2006 | Brazil                 | 14 (10-19)           |                       | 0 (0-0)             |                          | 10 (1-17)             |                        | 0 (0-0)                  |                          | 0 (0-0)              |                      | 0 (0-0)                 | 0 (0-0)            |
| 2007 | Brazil                 | 12 (8-16)            |                       | 0 (0-0)             |                          | 9 (1-14)              |                        | 0 (0-0)                  |                          | 0 (0-0)              |                      | 0 (0-0)                 | 0 (0-0)            |
| 2008 | Brazil                 | 10 (7-13)            |                       | 0 (0-0)             |                          | 7 (1-12)              |                        | 0 (0-0)                  |                          | 0 (0-0)              |                      | 0 (0-0)                 | 0 (0-0)            |
| 2009 | Brazil                 | 8 (6-11)             |                       | 0 (0-0)             |                          | 5 (1-9)               |                        | 0 (0-0)                  |                          | 0 (0-0)              |                      | 0 (0-0)                 | 0 (0-0)            |
| 2010 | Brazil                 | 7 (5-9)              |                       | 0 (0-0)             |                          | 5 (0-8)               |                        | 0 (0-0)                  |                          | 0 (0-0)              |                      | 0 (0-0)                 | 0 (0-0)            |
| 2011 | Brazil                 | 7 (5-9)              |                       | 0 (0-0)             |                          | 3 (0-6)               |                        | 0 (0-0)                  |                          | 0 (0-0)              |                      | 0 (0-0)                 | 0 (0-0)            |
| 2012 | Brazil                 | 7 (5-10)             |                       | 0 (0-0)             |                          | 3 (0-5)               |                        | 0 (0-0)                  |                          | 0 (0-0)              |                      | 0 (0-0)                 | 0 (0-0)            |
| 2013 | Brazil                 | 9 (6-11)             |                       | 0 (0-0)             |                          | 3 (0-5)               |                        | 0 (0-0)                  |                          | 0 (0-0)              |                      | 0 (0-0)                 | 0 (0-0)            |
| 2014 | Brazil                 | 11 (8-15)            |                       | 0 (0-0)             |                          | 4 (0-8)               |                        | 0 (0-0)                  |                          | 0 (0-0)              |                      | 0 (0-0)                 | 0 (0-0)            |
| 2015 | Brazil                 | 13 (9-17)            | 0 (0-0)               | 0 (0-0)             | 0 (0-0)                  | 5 (1-9)               | 0 (0-0)                | 0 (0-0)                  | 0 (0-0)                  | 0 (0-0)              | 0 (0-0)              | 0 (0-0)                 | 0 (0-0)            |
| 2000 | Brunei Darussalam      | 1 (0-1)              |                       | 2 (1-2)             |                          | 0 (0-0)               |                        | 0 (0-0)                  |                          | 0 (0-0)              |                      | 0 (0-0)                 | 0 (0-0)            |
| 2001 | Brunei Darussalam      | 0 (0-1)              |                       | 1 (1-2)             |                          | 0 (0-0)               |                        | 0 (0-0)                  |                          | 0 (0-0)              |                      | 0 (0-0)                 | 0 (0-0)            |
| 2002 | Brunei Darussalam      | 0 (0-0)              |                       | 0 (0-0)             |                          | 0 (0-0)               |                        | 0 (0-0)                  |                          | 0 (0-0)              |                      | 0 (0-0)                 | 0 (0-0)            |
| 2003 | Brunei Darussalam      | 0 (0-0)              |                       | 0 (0-0)             |                          | 0 (0-0)               |                        | 0 (0-0)                  |                          | 0 (0-0)              |                      | 0 (0-0)                 | 0 (0-0)            |
| 2004 | Brunei Darussalam      | 0 (0-0)              |                       | 0 (0-0)             |                          | 0 (0-0)               |                        | 0 (0-0)                  |                          | 0 (0-0)              |                      | 0 (0-0)                 | 0 (0-0)            |
| 2005 | Brunei Darussalam      | 0 (0-0)              |                       | 0 (0-0)             |                          | 0 (0-0)               |                        | 0 (0-0)                  |                          | 0 (0-0)              |                      | 0 (0-0)                 | 0 (0-0)            |
| 2006 | Brunei Darussalam      | 0 (0-0)              |                       | 0 (0-0)             |                          | 0 (0-0)               |                        | 0 (0-0)                  |                          | 0 (0-0)              |                      | 0 (0-0)                 | 0 (0-0)            |
| 2007 | Brunei Darussalam      | 0 (0-0)              |                       | 0 (0-0)             |                          | 0 (0-0)               |                        | 0 (0-0)                  |                          | 0 (0-0)              |                      | 0 (0-0)                 | 0 (0-0)            |
| 2008 | Brunei Darussalam      | 0 (0-0)              |                       | 0 (0-0)             |                          | 0 (0-0)               |                        | 0 (0-0)                  |                          | 0 (0-0)              |                      | 0 (0-0)                 | 0 (0-0)            |
| 2009 | Brunei Darussalam      | 0 (0-0)              |                       | 0 (0-0)             |                          | 0 (0-0)               |                        | 0 (0-0)                  |                          | 0 (0-0)              |                      | 0 (0-0)                 | 0 (0-0)            |
| 2010 | Brunei Darussalam      | 0 (0-0)              |                       | 0 (0-0)             |                          | 0 (0-0)               |                        | 0 (0-0)                  |                          | 0 (0-0)              |                      | 0 (0-0)                 | 0 (0-0)            |
| 2011 | Brunei Darussalam      | 0 (0-0)              |                       | 0 (0-0)             |                          | 0 (0-0)               |                        | 0 (0-0)                  |                          | 0 (0-0)              |                      | 0 (0-0)                 | 0 (0-0)            |
| 2012 | Brunei Darussalam      | 0 (0-0)              |                       | 0 (0-0)             |                          | 0 (0-0)               |                        | 0 (0-0)                  |                          | 0 (0-0)              |                      | 0 (0-0)                 | 0 (0-0)            |
| 2013 | Brunei Darussalam      | 0 (0-0)              |                       | 0 (0-0)             |                          | 0 (0-0)               |                        | 0 (0-0)                  |                          | 0 (0-0)              |                      | 0 (0-0)                 | 0 (0-0)            |
| 2014 | Brunei Darussalam      | 0 (0-0)              |                       | 0 (0-0)             |                          | 0 (0-0)               |                        | 0 (0-0)                  |                          | 0 (0-0)              |                      | 0 (0-0)                 | 0 (0-0)            |
| 2015 | Brunei Darussalam      | 0 (0-0)              | 0 (0-0)               | 0 (0-0)             | 0 (0-0)                  | 0 (0-0)               | 0 (0-0)                | 0 (0-0)                  | 0 (0-0)                  | 0 (0-0)              | 0 (0-0)              | 0 (0-0)                 | 0 (0-0)            |
| 2000 | Bulgaria               | 44 (31-57)           |                       | 13 (9-18)           |                          | 4 (2-8)               |                        | 1 (1-3)                  |                          | 0 (0-0)              |                      | 0 (0-0)                 | 0 (0-0)            |
| 2001 | Bulgaria               | 41 (29-54)           |                       | 13 (9-17)           |                          | 4 (2-7)               |                        | 1 (1-2)                  |                          | 0 (0-0)              |                      | 0 (0-0)                 | 0 (0-0)            |
| 2002 | Bulgaria               | 33 (23-43)           |                       | 10 (7-14)           |                          | 2 (1-4)               |                        | 1 (0-1)                  |                          | 0 (0-0)              |                      | 0 (0-0)                 | 0 (0-0)            |
| 2003 | Bulgaria               | 39 (27-51)           |                       | 12 (9-16)           |                          | 5 (2-10)              |                        | 2 (1-3)                  |                          | 0 (0-0)              |                      | 0 (0-0)                 | 0 (0-0)            |
| 2004 | Bulgaria               | 27 (19-36)           |                       | 9 (6-12)            |                          | 4 (2-8)               |                        | 1 (1-3)                  |                          | 0 (0-0)              |                      | 0 (0-0)                 | 0 (0-0)            |
| 2005 | Bulgaria               | 31 (21-40)           |                       | 10 (7-13)           |                          | 4 (2-7)               |                        | 1 (1-2)                  |                          | 0 (0-0)              |                      | 0 (0-0)                 | 0 (0-0)            |
| 2006 | Bulgaria               | 30 (21-39)           |                       | 9 (7-12)            |                          | 5 (2-9)               |                        | 2 (1-3)                  |                          | 0 (0-0)              |                      | 0 (0-0)                 | 0 (0-0)            |
| 2007 | Bulgaria               | 27 (19-36)           |                       | 8 (6-11)            |                          | 4 (2-8)               |                        | 1 (1-2)                  |                          | 0 (0-0)              |                      | 0 (0-0)                 | 0 (0-0)            |
| 2008 | Bulgaria               | 24 (17-32)           |                       | 7 (5-9)             |                          | 6 (2-10)              |                        | 2 (1-3)                  |                          | 0 (0-0)              |                      | 0 (0-0)                 | 0 (0-0)            |
| 2009 | Bulgaria               | 36 (25-47)           |                       | 10 (7-13)           |                          | 4 (2-7)               |                        | 1 (0-2)                  |                          | 0 (0-0)              |                      | 0 (0-0)                 | 0 (0-0)            |
| 2010 | Bulgaria               | 6 (4-8)              |                       | 2 (1-2)             |                          | 1 (0-2)               |                        | 0 (0-0)                  |                          | 0 (0-0)              |                      | 0 (0-0)                 | 0 (0-0)            |
| 2011 | Bulgaria               | 2 (2-3)              |                       | 1 (0-1)             |                          | 0 (0-1)               |                        | 0 (0-0)                  |                          | 0 (0-0)              |                      | 0 (0-0)                 | 0 (0-0)            |
| 2012 | Bulgaria               | 2 (2-3)              |                       | 1 (0-1)             |                          | 0 (0-1)               |                        | 0 (0-0)                  |                          | 0 (0-0)              |                      | 0 (0-0)                 | 0 (0-0)            |
| 2013 | Bulgaria               | 2 (2-3)              |                       | 1 (0-1)             |                          | 0 (0-1)               |                        | 0 (0-0)                  |                          | 0 (0-0)              |                      | 0 (0-0)                 | 0 (0-0)            |
| 2014 | Bulgaria               | 3 (2-4)              |                       | 1 (1-1)             |                          | 0 (0-1)               |                        | 0 (0-0)                  |                          | 0 (0-0)              |                      | 0 (0-0)                 | 0 (0-0)            |
| 2015 | Bulgaria               | 0 (0-0)              | 0 (0-0)               | 0 (0-0)             | 0 (0-0)                  | 0 (0-0)               | 0 (0-0)                | 0 (0-0)                  | 0 (0-0)                  | 0 (0-0)              | 0 (0-0)              | 0 (0-0)                 | 0 (0-0)            |
| 2000 | Burkina Faso           | 1211 (852-1591)      |                       | 57 (40-74)          |                          | 535 (246-798)         |                        | 25 (12-37)               |                          | 2 (1-3)              |                      | 0 (0-0)                 | 0 (0-0)            |
| 2001 | Burkina Faso           | 1284 (903-1688)      |                       | 58 (41-77)          |                          | 566 (262-843)         |                        | 26 (12-38)               |                          | 2 (1-3)              |                      | 0 (0-0)                 | 0 (0-0)            |
| 2002 | Burkina Faso           | 1366 (961-1795)      |                       | 60 (42-79)          |                          | 601 (279-892)         |                        | 27 (12-39)               |                          | 2 (1-4)              |                      | 0 (0-0)                 | 0 (0-0)            |
| 2003 | Burkina Faso           | 1455 (1023-1911)     |                       | 63 (44-82)          |                          | 637 (297-945)         |                        | 27 (13-41)               |                          | 3 (1-4)              |                      | 0 (0-0)                 | 0 (0-0)            |
| 2004 | Burkina Faso           | 1534 (1079-2015)     |                       | 64 (45-85)          |                          | 668 (313-990)         |                        | 28 (13-42)               |                          | 3 (1-4)              |                      | 0 (0-0)                 | 0 (0-0)            |
| 2005 | Burkina Faso           | 1565 (1101-2057)     |                       | 64 (45-84)          |                          | 678 (319-1004)        |                        | 28 (13-41)               |                          | 3 (1-4)              |                      | 0 (0-0)                 | 0 (0-0)            |
| 2006 | Burkina Faso           | 328 (231-431)        |                       | 13 (9-17)           |                          | 142 (45-231)          |                        | 6 (2-9)                  |                          | 1 (0-1)              |                      | 0 (0-0)                 | 0 (0-0)            |
| 2007 | Burkina Faso           | 118 (83-155)         |                       | 5 (3-6)             |                          | 51 (17-82)            |                        | 2 (1-3)                  |                          | 0 (0-0)              |                      | 0 (0-0)                 | 0 (0-0)            |
| 2008 | Burkina Faso           | 99 (69-129)          |                       | 4 (3-5)             |                          | 42 (14-68)            |                        | 2 (1-3)                  |                          | 0 (0-0)              |                      | 0 (0-0)                 | 0 (0-0)            |
| 2009 | Burkina Faso           | 96 (68-126)          |                       | 4 (2-5)             |                          | 41 (14-65)            |                        | 1 (1-2)                  |                          | 0 (0-0)              |                      | 0 (0-0)                 | 0 (0-0)            |
| 2010 | Burkina Faso           | 99 (70-130)          |                       | 4 (2-5)             |                          | 41 (15-65)            |                        | 1 (1-2)                  |                          | 0 (0-0)              |                      | 0 (0-0)                 | 0 (0-0)            |
| 2011 | Burkina Faso           | 15 (9-18)            |                       | 0 (0-1)             |                          | 5 (2-9)               |                        | 0 (0-0)                  |                          | 0 (0-0)              |                      | 0 (0-0)                 | 0 (0-0)            |
| 2012 | Burkina Faso           | 14 (10-19)           |                       | 0 (0-1)             |                          | 6 (2-9)               |                        | 0 (0-0)                  |                          | 0 (0-0)              |                      | 0 (0-0)                 | 0 (0-0)            |
| 2013 | Burkina Faso           | 15 (11-20)           |                       | 1 (0-1)             |                          | 6 (3-9)               |                        | 0 (0-0)                  |                          | 0 (0-0)              |                      | 0 (0-0)                 | 0 (0-0)            |
| 2014 | Burkina Faso           | 16 (11-21)           |                       | 1 (0-1)             |                          | 6 (3-10)              |                        | 0 (0-0)                  |                          | 0 (0-0)              |                      | 0 (0-0)                 | 0 (0-0)            |
| 2015 | Burkina Faso           | 16 (11-21)           | 0 (0-0)               | 1 (0-1)             | 0 (0-0)                  | 6 (3-10)              | 0 (0-0)                | 0 (0-0)                  | 0 (0-0)                  | 0 (0-0)              | 0 (0-0)              | 0 (0-0)                 | 0 (0-0)            |
| 2000 | Burundi                | 1043 (734-1371)      |                       | 87 (61-114)         |                          | 524 (249-772)         |                        | 44 (21-64)               |                          | 2 (1-3)              |                      | 0 (0-0)                 | 0 (0-0)            |
| 2001 | Burundi                | 1040 (732-1367)      |                       | 86 (60-113)         |                          | 525 (167-854)         |                        | 43 (14-70)               |                          | 2 (1-3)              |                      | 0 (0-0)                 | 0 (0-0)            |
| 2002 | Burundi                | 1025 (721-1347)      |                       | 83 (58-109)         |                          | 521 (165-847)         |                        | 42 (13-69)               |                          | 2 (1-3)              |                      | 0 (0-0)                 | 0 (0-0)            |
| 2003 | Burundi                | 1089 (766-1431)      |                       | 86 (60-113)         |                          | 557 (176-905)         |                        | 44 (14-71)               |                          | 2 (1-4)              |                      | 0 (0-0)                 | 0 (0-0)            |
| 2004 | Burundi                | 186 (131-244)        |                       | 14 (10-19)          |                          | 96 (30-156)           |                        | 7 (2-12)                 |                          | 0 (0-1)              |                      | 0 (0-0)                 | 0 (0-0)            |
| 2005 | Burundi                | 98 (69-128)          |                       | 7 (5-9)             |                          | 50 (16-82)            |                        | 4 (1-6)                  |                          | 0 (0-0)              |                      | 0 (0-0)                 | 0 (0-0)            |
| 2006 | Burundi                | 93 (65-122)          |                       | 7 (5-9)             |                          | 48 (15-78)            |                        | 3 (1-5)                  |                          | 0 (0-0)              |                      | 0 (0-0)                 | 0 (0-0)            |

Hib = *Haemophilus influenzae* type b; npnm = non-pneumonia, non-meningitis; HIV = deaths only in HIV-infected children; Uncertainty range provided in parentheses.

| Year | Country                  | Hib pneumonia deaths (UR) | Hib pneumonia deaths, HIV (UR) | Hib pneumonia mortality rate (UR) | Hib pneumonia mortality rate, HIV (UR) | Hib meningitis deaths (UR) | Hib meningitis deaths, HIV (UR) | Hib meningitis mortality rate (UR) | Hib meningitis mortality rate, HIV (UR) | Hib NPMN deaths (UR) | Hib NPMN deaths, HIV (UR) | Hib NPMN mortality rate (UR) | Hib NPMN mortality rate, HIV (UR) |
|------|--------------------------|---------------------------|--------------------------------|-----------------------------------|----------------------------------------|----------------------------|---------------------------------|------------------------------------|-----------------------------------------|----------------------|---------------------------|------------------------------|-----------------------------------|
| 2007 | Burundi                  | 72 (50-94)                |                                | 5 (3-6)                           |                                        | 37 (12-59)                 |                                 | 2 (1-4)                            |                                         | 0 (0-0)              |                           | 0 (0-0)                      |                                   |
| 2008 | Burundi                  | 93 (66-123)               |                                | 6 (4-8)                           |                                        | 48 (16-77)                 |                                 | 3 (1-5)                            |                                         | 0 (0-0)              |                           | 0 (0-0)                      |                                   |
| 2009 | Burundi                  | 12 (8-16)                 |                                | 1 (1-1)                           |                                        | 6 (2-10)                   |                                 | 0 (0-1)                            |                                         | 0 (0-0)              |                           | 0 (0-0)                      |                                   |
| 2010 | Burundi                  | 12 (8-16)                 |                                | 1 (0-1)                           |                                        | 6 (2-10)                   |                                 | 0 (0-1)                            |                                         | 0 (0-0)              |                           | 0 (0-0)                      |                                   |
| 2011 | Burundi                  | 12 (8-16)                 |                                | 1 (0-1)                           |                                        | 6 (2-10)                   |                                 | 0 (0-1)                            |                                         | 0 (0-0)              |                           | 0 (0-0)                      |                                   |
| 2012 | Burundi                  | 12 (8-16)                 |                                | 1 (0-1)                           |                                        | 6 (2-9)                    |                                 | 0 (0-1)                            |                                         | 0 (0-0)              |                           | 0 (0-0)                      |                                   |
| 2013 | Burundi                  | 12 (8-16)                 |                                | 1 (0-1)                           |                                        | 6 (2-9)                    |                                 | 0 (0-0)                            |                                         | 0 (0-0)              |                           | 0 (0-0)                      |                                   |
| 2014 | Burundi                  | 12 (8-16)                 |                                | 1 (0-1)                           |                                        | 6 (2-9)                    |                                 | 0 (0-0)                            |                                         | 0 (0-0)              |                           | 0 (0-0)                      |                                   |
| 2015 | Burundi                  | 12 (8-15)                 | 0 (0-0)                        | 1 (0-1)                           | 0 (0-0)                                | 6 (3-9)                    | 0 (0-0)                         | 0 (0-0)                            | 0 (0-0)                                 | 0 (0-0)              | 0 (0-0)                   | 0 (0-0)                      | 0 (0-0)                           |
| 2000 | Cambodia                 | 1147 (807-1508)           |                                | 74 (52-97)                        |                                        | 500 (156-803)              |                                 | 32 (10-52)                         |                                         | 2 (1-3)              |                           | 0 (0-0)                      |                                   |
| 2001 | Cambodia                 | 1021 (718-1341)           |                                | 67 (47-88)                        |                                        | 437 (139-699)              |                                 | 29 (9-46)                          |                                         | 2 (1-3)              |                           | 0 (0-0)                      |                                   |
| 2002 | Cambodia                 | 901 (634-1184)            |                                | 60 (42-79)                        |                                        | 379 (122-604)              |                                 | 25 (8-40)                          |                                         | 2 (0-2)              |                           | 0 (0-0)                      |                                   |
| 2003 | Cambodia                 | 800 (562-1051)            |                                | 53 (38-70)                        |                                        | 330 (108-525)              |                                 | 22 (7-35)                          |                                         | 1 (0-2)              |                           | 0 (0-0)                      |                                   |
| 2004 | Cambodia                 | 730 (513-959)             |                                | 49 (34-64)                        |                                        | 296 (89-483)               |                                 | 20 (6-32)                          |                                         | 2 (1-4)              |                           | 0 (0-0)                      |                                   |
| 2005 | Cambodia                 | 677 (476-890)             |                                | 45 (32-59)                        |                                        | 269 (82-438)               |                                 | 18 (5-29)                          |                                         | 2 (1-3)              |                           | 0 (0-0)                      |                                   |
| 2006 | Cambodia                 | 637 (448-837)             |                                | 41 (29-54)                        |                                        | 247 (78-401)               |                                 | 16 (5-26)                          |                                         | 2 (1-3)              |                           | 0 (0-0)                      |                                   |
| 2007 | Cambodia                 | 597 (420-784)             |                                | 38 (27-50)                        |                                        | 228 (74-367)               |                                 | 14 (5-23)                          |                                         | 2 (1-3)              |                           | 0 (0-0)                      |                                   |
| 2008 | Cambodia                 | 557 (392-732)             |                                | 35 (24-46)                        |                                        | 210 (70-336)               |                                 | 13 (4-21)                          |                                         | 2 (1-3)              |                           | 0 (0-0)                      |                                   |
| 2009 | Cambodia                 | 509 (358-669)             |                                | 31 (22-41)                        |                                        | 190 (66-303)               |                                 | 12 (4-19)                          |                                         | 2 (1-2)              |                           | 0 (0-0)                      |                                   |
| 2010 | Cambodia                 | 74 (52-98)                |                                | 5 (3-6)                           |                                        | 27 (10-43)                 |                                 | 2 (1-3)                            |                                         | 0 (0-0)              |                           | 0 (0-0)                      |                                   |
| 2011 | Cambodia                 | 36 (25-48)                |                                | 2 (1-3)                           |                                        | 13 (5-21)                  |                                 | 1 (0-1)                            |                                         | 0 (0-0)              |                           | 0 (0-0)                      |                                   |
| 2012 | Cambodia                 | 31 (22-40)                |                                | 2 (1-2)                           |                                        | 11 (4-17)                  |                                 | 1 (0-1)                            |                                         | 0 (0-0)              |                           | 0 (0-0)                      |                                   |
| 2013 | Cambodia                 | 29 (21-39)                |                                | 2 (1-2)                           |                                        | 10 (4-16)                  |                                 | 1 (0-1)                            |                                         | 0 (0-0)              |                           | 0 (0-0)                      |                                   |
| 2014 | Cambodia                 | 25 (17-32)                |                                | 1 (1-2)                           |                                        | 9 (3-13)                   |                                 | 0 (0-1)                            |                                         | 0 (0-0)              |                           | 0 (0-0)                      |                                   |
| 2015 | Cambodia                 | 3 (2-4)                   | 0 (0-0)                        | 0 (0-0)                           | 0 (0-0)                                | 1 (0-2)                    | 0 (0-0)                         | 0 (0-0)                            | 0 (0-0)                                 | 0 (0-0)              | 0 (0-0)                   | 0 (0-0)                      | 0 (0-0)                           |
| 2000 | Cameroon                 | 2295 (1614-3015)          |                                | 85 (60-111)                       |                                        | 818 (263-1230)             |                                 | 30 (13-45)                         |                                         | 3 (1-5)              |                           | 0 (0-0)                      |                                   |
| 2001 | Cameroon                 | 2225 (1565-2924)          |                                | 80 (56-105)                       |                                        | 789 (232-1302)             |                                 | 28 (8-47)                          |                                         | 3 (1-5)              |                           | 0 (0-0)                      |                                   |
| 2002 | Cameroon                 | 2215 (1558-2910)          |                                | 78 (55-102)                       |                                        | 782 (236-1282)             |                                 | 28 (8-45)                          |                                         | 3 (1-5)              |                           | 0 (0-0)                      |                                   |
| 2003 | Cameroon                 | 2154 (1515-2830)          |                                | 74 (52-97)                        |                                        | 757 (235-1235)             |                                 | 26 (8-42)                          |                                         | 3 (1-5)              |                           | 0 (0-0)                      |                                   |
| 2004 | Cameroon                 | 2104 (1480-2765)          |                                | 71 (50-93)                        |                                        | 737 (235-1195)             |                                 | 25 (8-40)                          |                                         | 3 (1-5)              |                           | 0 (0-0)                      |                                   |
| 2005 | Cameroon                 | 2093 (1472-2750)          |                                | 69 (48-90)                        |                                        | 733 (229-1193)             |                                 | 24 (8-39)                          |                                         | 3 (1-5)              |                           | 0 (0-0)                      |                                   |
| 2006 | Cameroon                 | 2131 (1499-2800)          |                                | 68 (48-89)                        |                                        | 746 (229-1220)             |                                 | 24 (7-39)                          |                                         | 3 (1-5)              |                           | 0 (0-0)                      |                                   |
| 2007 | Cameroon                 | 2155 (1516-2832)          |                                | 67 (47-88)                        |                                        | 756 (230-1237)             |                                 | 24 (7-39)                          |                                         | 3 (1-5)              |                           | 0 (0-0)                      |                                   |
| 2008 | Cameroon                 | 2231 (1569-2931)          |                                | 68 (48-90)                        |                                        | 783 (237-1282)             |                                 | 24 (7-39)                          |                                         | 3 (1-5)              |                           | 0 (0-0)                      |                                   |
| 2009 | Cameroon                 | 391 (275-514)             |                                | 12 (8-15)                         |                                        | 137 (41-225)               |                                 | 4 (1-7)                            |                                         | 1 (0-1)              |                           | 0 (0-0)                      |                                   |
| 2010 | Cameroon                 | 216 (152-284)             |                                | 6 (5-8)                           |                                        | 76 (23-124)                |                                 | 2 (1-4)                            |                                         | 0 (0-1)              |                           | 0 (0-0)                      |                                   |
| 2011 | Cameroon                 | 226 (159-297)             |                                | 7 (5-9)                           |                                        | 79 (23-130)                |                                 | 2 (1-4)                            |                                         | 0 (0-1)              |                           | 0 (0-0)                      |                                   |
| 2012 | Cameroon                 | 212 (149-278)             |                                | 6 (4-8)                           |                                        | 74 (22-122)                |                                 | 2 (1-3)                            |                                         | 0 (0-0)              |                           | 0 (0-0)                      |                                   |
| 2013 | Cameroon                 | 192 (135-252)             |                                | 5 (4-7)                           |                                        | 67 (20-110)                |                                 | 2 (0-3)                            |                                         | 0 (0-0)              |                           | 0 (0-0)                      |                                   |
| 2014 | Cameroon                 | 23 (16-30)                |                                | 1 (0-1)                           |                                        | 8 (2-13)                   |                                 | 0 (0-0)                            |                                         | 0 (0-0)              |                           | 0 (0-0)                      |                                   |
| 2015 | Cameroon                 | 22 (16-30)                | 1 (1-1)                        | 1 (0-1)                           | 0 (0-0)                                | 8 (2-13)                   | 0 (0-0)                         | 0 (0-0)                            | 0 (0-0)                                 | 0 (0-0)              | 0 (0-0)                   | 0 (0-0)                      | 0 (0-0)                           |
| 2000 | Canada                   | 1 (1-1)                   |                                | 0 (0-0)                           |                                        | 1 (1-2)                    |                                 | 0 (0-0)                            |                                         | 0 (0-0)              |                           | 0 (0-0)                      |                                   |
| 2001 | Canada                   | 0 (0-0)                   |                                | 0 (0-0)                           |                                        | 0 (0-0)                    |                                 | 0 (0-0)                            |                                         | 0 (0-0)              |                           | 0 (0-0)                      |                                   |
| 2002 | Canada                   | 0 (0-0)                   |                                | 0 (0-0)                           |                                        | 0 (0-0)                    |                                 | 0 (0-0)                            |                                         | 0 (0-0)              |                           | 0 (0-0)                      |                                   |
| 2003 | Canada                   | 0 (0-0)                   |                                | 0 (0-0)                           |                                        | 0 (0-0)                    |                                 | 0 (0-0)                            |                                         | 0 (0-0)              |                           | 0 (0-0)                      |                                   |
| 2004 | Canada                   | 0 (0-0)                   |                                | 0 (0-0)                           |                                        | 0 (0-0)                    |                                 | 0 (0-0)                            |                                         | 0 (0-0)              |                           | 0 (0-0)                      |                                   |
| 2005 | Canada                   | 0 (0-0)                   |                                | 0 (0-0)                           |                                        | 0 (0-0)                    |                                 | 0 (0-0)                            |                                         | 0 (0-0)              |                           | 0 (0-0)                      |                                   |
| 2006 | Canada                   | 0 (0-0)                   |                                | 0 (0-0)                           |                                        | 0 (0-0)                    |                                 | 0 (0-0)                            |                                         | 0 (0-0)              |                           | 0 (0-0)                      |                                   |
| 2007 | Canada                   | 0 (0-0)                   |                                | 0 (0-0)                           |                                        | 0 (0-0)                    |                                 | 0 (0-0)                            |                                         | 0 (0-0)              |                           | 0 (0-0)                      |                                   |
| 2008 | Canada                   | 0 (0-0)                   |                                | 0 (0-0)                           |                                        | 0 (0-0)                    |                                 | 0 (0-0)                            |                                         | 0 (0-0)              |                           | 0 (0-0)                      |                                   |
| 2009 | Canada                   | 0 (0-0)                   |                                | 0 (0-0)                           |                                        | 0 (0-0)                    |                                 | 0 (0-0)                            |                                         | 0 (0-0)              |                           | 0 (0-0)                      |                                   |
| 2010 | Canada                   | 0 (0-0)                   |                                | 0 (0-0)                           |                                        | 0 (0-0)                    |                                 | 0 (0-0)                            |                                         | 0 (0-0)              |                           | 0 (0-0)                      |                                   |
| 2011 | Canada                   | 0 (0-0)                   |                                | 0 (0-0)                           |                                        | 0 (0-0)                    |                                 | 0 (0-0)                            |                                         | 0 (0-0)              |                           | 0 (0-0)                      |                                   |
| 2012 | Canada                   | 0 (0-0)                   |                                | 0 (0-0)                           |                                        | 0 (0-0)                    |                                 | 0 (0-0)                            |                                         | 0 (0-0)              |                           | 0 (0-0)                      |                                   |
| 2013 | Canada                   | 0 (0-0)                   |                                | 0 (0-0)                           |                                        | 0 (0-0)                    |                                 | 0 (0-0)                            |                                         | 0 (0-0)              |                           | 0 (0-0)                      |                                   |
| 2014 | Canada                   | 0 (0-0)                   |                                | 0 (0-0)                           |                                        | 0 (0-0)                    |                                 | 0 (0-0)                            |                                         | 0 (0-0)              |                           | 0 (0-0)                      |                                   |
| 2015 | Canada                   | 0 (0-0)                   | 0 (0-0)                        | 0 (0-0)                           | 0 (0-0)                                | 0 (0-0)                    | 0 (0-0)                         | 0 (0-0)                            | 0 (0-0)                                 | 0 (0-0)              | 0 (0-0)                   | 0 (0-0)                      | 0 (0-0)                           |
| 2000 | Cape Verde               | 11 (8-15)                 |                                | 19 (13-24)                        |                                        | 2 (1-3)                    |                                 | 3 (2-5)                            |                                         | 0 (0-0)              |                           | 0 (0-0)                      |                                   |
| 2001 | Cape Verde               | 10 (7-13)                 |                                | 16 (11-21)                        |                                        | 1 (1-2)                    |                                 | 2 (1-4)                            |                                         | 0 (0-0)              |                           | 0 (0-0)                      |                                   |
| 2002 | Cape Verde               | 9 (6-11)                  |                                | 15 (10-19)                        |                                        | 1 (0-2)                    |                                 | 2 (1-3)                            |                                         | 0 (0-0)              |                           | 0 (0-0)                      |                                   |
| 2003 | Cape Verde               | 8 (6-10)                  |                                | 14 (10-18)                        |                                        | 1 (0-1)                    |                                 | 2 (1-2)                            |                                         | 0 (0-0)              |                           | 0 (0-0)                      |                                   |
| 2004 | Cape Verde               | 7 (5-10)                  |                                | 13 (9-17)                         |                                        | 1 (0-1)                    |                                 | 2 (1-2)                            |                                         | 0 (0-0)              |                           | 0 (0-0)                      |                                   |
| 2005 | Cape Verde               | 7 (5-10)                  |                                | 13 (9-18)                         |                                        | 1 (0-1)                    |                                 | 1 (1-2)                            |                                         | 0 (0-0)              |                           | 0 (0-0)                      |                                   |
| 2006 | Cape Verde               | 7 (5-10)                  |                                | 14 (10-18)                        |                                        | 1 (0-1)                    |                                 | 2 (1-2)                            |                                         | 0 (0-0)              |                           | 0 (0-0)                      |                                   |
| 2007 | Cape Verde               | 8 (5-10)                  |                                | 14 (10-19)                        |                                        | 1 (0-1)                    |                                 | 2 (1-3)                            |                                         | 0 (0-0)              |                           | 0 (0-0)                      |                                   |
| 2008 | Cape Verde               | 8 (5-10)                  |                                | 15 (10-19)                        |                                        | 1 (0-1)                    |                                 | 2 (1-3)                            |                                         | 0 (0-0)              |                           | 0 (0-0)                      |                                   |
| 2009 | Cape Verde               | 7 (5-10)                  |                                | 14 (10-19)                        |                                        | 1 (0-1)                    |                                 | 2 (1-3)                            |                                         | 0 (0-0)              |                           | 0 (0-0)                      |                                   |
| 2010 | Cape Verde               | 7 (5-9)                   |                                | 14 (10-19)                        |                                        | 1 (0-1)                    |                                 | 2 (1-3)                            |                                         | 0 (0-0)              |                           | 0 (0-0)                      |                                   |
| 2011 | Cape Verde               | 1 (1-2)                   |                                | 2 (2-3)                           |                                        | 0 (0-0)                    |                                 | 0 (0-1)                            |                                         | 0 (0-0)              |                           | 0 (0-0)                      |                                   |
| 2012 | Cape Verde               | 1 (0-1)                   |                                | 1 (1-1)                           |                                        | 0 (0-0)                    |                                 | 0 (0-0)                            |                                         | 0 (0-0)              |                           | 0 (0-0)                      |                                   |
| 2013 | Cape Verde               | 1 (0-1)                   |                                | 1 (1-1)                           |                                        | 0 (0-0)                    |                                 | 0 (0-0)                            |                                         | 0 (0-0)              |                           | 0 (0-0)                      |                                   |
| 2014 | Cape Verde               | 1 (0-1)                   |                                | 1 (1-1)                           |                                        | 0 (0-0)                    |                                 | 0 (0-0)                            |                                         | 0 (0-0)              |                           | 0 (0-0)                      |                                   |
| 2015 | Cape Verde               | 1 (0-1)                   | 0 (0-0)                        | 1 (1-1)                           | 0 (0-0)                                | 0 (0-0)                    | 0 (0-0)                         | 0 (0-0)                            | 0 (0-0)                                 | 0 (0-0)              | 0 (0-0)                   | 0 (0-0)                      | 0 (0-0)                           |
| 2000 | Central African Republic | 421 (296-554)             |                                | 71 (50-93)                        |                                        | 209 (96-312)               |                                 | 35 (16-52)                         |                                         | 1 (0-1)              |                           | 0 (0-0)                      |                                   |
| 2001 | Central African Republic | 424 (298-557)             |                                | 69 (49-91)                        |                                        | 211 (96-314)               |                                 | 35 (16-51)                         |                                         | 1 (0-1)              |                           | 0 (0-0)                      |                                   |
| 2002 | Central African Republic | 429 (302-563)             |                                | 69 (49-91)                        |                                        | 214 (98-318)               |                                 | 35 (16-51)                         |                                         | 1 (0-1)              |                           | 0 (0-0)                      |                                   |
| 2003 | Central African Republic | 419 (295-551)             |                                | 67 (47-88)                        |                                        | 209 (96-312)               |                                 | 34 (15-50)                         |                                         | 1 (0-1)              |                           | 0 (0-0)                      |                                   |
| 2004 | Central African Republic | 408 (287-536)             |                                | 65 (46-86)                        |                                        | 204 (93-304)               |                                 | 33 (15-49)                         |                                         | 1 (0-1)              |                           | 0 (0-0)                      |                                   |
| 2005 | Central African Republic | 396 (279-520)             |                                | 63 (44-83)                        |                                        | 197 (90-294)               |                                 | 31 (14-47)                         |                                         | 1 (0-1)              |                           | 0 (0-0)                      |                                   |
| 2006 | Central African Republic | 412 (290-542)             |                                | 65 (46-86)                        |                                        | 204 (93-304)               |                                 | 32 (15-48)                         |                                         | 1 (0-1)              |                           | 0 (0-0)                      |                                   |
| 2007 | Central African Republic | 431 (303-567)             |                                | 68 (48-89)                        |                                        | 210 (96-314)               |                                 | 33 (15-49)                         |                                         | 1 (0-1)              |                           | 0 (0-0)                      |                                   |
| 2008 | Central African Republic | 447 (315-588)             |                                | 70 (49-92)                        |                                        | 216 (98-322)               |                                 | 34 (15-51)                         |                                         | 1 (0-1)              |                           | 0 (0-0)                      |                                   |
| 2009 | Central African Republic | 305 (215-401)             |                                | 48 (34-63)                        |                                        | 145 (66-217)               |                                 | 23 (10-34)                         |                                         | 1 (0-1)              |                           | 0 (0-0)                      |                                   |
| 2010 | Central African Republic | 81 (57-107)               |                                | 13 (9-17)                         |                                        | 38 (17-57)                 |                                 | 9 (4-9)                            |                                         | 0 (0-0)              |                           | 0 (0-0)                      |                                   |
| 2011 | Central African Republic | 83 (58-109)               |                                | 13 (9-17)                         |                                        | 40 (12-65)                 |                                 | 6 (2-10)                           |                                         | 0 (0-0)              |                           | 0 (0-0)                      |                                   |
| 2012 | Central African Republic | 83 (59-109)               |                                | 13 (9-17)                         |                                        | 40 (12-66)                 |                                 | 6 (2-10)                           |                                         | 0 (0-0)              |                           | 0 (0-0)                      |                                   |
| 2013 | Central African Republic | 326 (229-428)             |                                | 48 (34-64)                        |                                        | 162 (47-267)               |                                 | 24 (7-40)                          |                                         | 1 (0-1)              |                           | 0 (0-0)                      |                                   |
| 2014 | Central African Republic | 88 (62-115)               |                                | 13 (9-17)                         |                                        | 44 (13-73)                 |                                 | 6 (2-11)                           |                                         | 0 (0-0)              |                           | 0 (0-0)                      |                                   |

Hib = *Haemophilus influenzae* type b; npmn = non-pneumonia, non-meningitis; HIV = deaths only in HIV-infected children; Uncertainty range provided in parentheses.

| Year | Country                  | Hib pneumonia        |                            |                              |                                    | Hib meningitis        |                             |                               |                                     | Hib NPNM        |                       |                         |                               |
|------|--------------------------|----------------------|----------------------------|------------------------------|------------------------------------|-----------------------|-----------------------------|-------------------------------|-------------------------------------|-----------------|-----------------------|-------------------------|-------------------------------|
|      |                          | Hib pneumonia deaths | Hib pneumonia deaths (HIV) | Hib pneumonia mortality rate | Hib pneumonia mortality rate (HIV) | Hib meningitis deaths | Hib meningitis deaths (HIV) | Hib meningitis mortality rate | Hib meningitis mortality rate (HIV) | Hib NPNM deaths | Hib NPNM deaths (HIV) | Hib NPNM mortality rate | Hib NPNM mortality rate (HIV) |
| 2015 | Central African Republic | 88 (62-115)          | 4 (3-5)                    | 13 (9-17)                    | 1 (0-1)                            | 45 (13-75)            | 2 (1-3)                     | 6 (2-11)                      | 0 (0-0)                             | 0 (0-0)         | 0 (0-0)               | 0 (0-0)                 |                               |
| 2000 | Chad                     | 2137 (1503-2808)     |                            | 129 (91-169)                 |                                    | 951 (415-1433)        |                             | 57 (25-86)                    |                                     | 4 (2-6)         | 0 (0-0)               | 0 (0-0)                 |                               |
| 2001 | Chad                     | 2186 (1537-2872)     |                            | 127 (89-166)                 |                                    | 960 (415-1451)        |                             | 56 (24-84)                    |                                     | 4 (2-6)         | 0 (0-0)               | 0 (0-0)                 |                               |
| 2002 | Chad                     | 2368 (1665-3111)     |                            | 132 (93-174)                 |                                    | 1016 (435-1541)       |                             | 57 (24-86)                    |                                     | 4 (2-6)         | 0 (0-0)               | 0 (0-0)                 |                               |
| 2003 | Chad                     | 2387 (1678-3136)     |                            | 129 (90-169)                 |                                    | 995 (421-1513)        |                             | 54 (23-82)                    |                                     | 4 (2-6)         | 0 (0-0)               | 0 (0-0)                 |                               |
| 2004 | Chad                     | 2477 (1742-3254)     |                            | 129 (91-170)                 |                                    | 1001 (420-1528)       |                             | 52 (22-80)                    |                                     | 4 (2-6)         | 0 (0-0)               | 0 (0-0)                 |                               |
| 2005 | Chad                     | 2565 (1804-3371)     |                            | 130 (91-170)                 |                                    | 1013 (429-1541)       |                             | 51 (22-78)                    |                                     | 4 (2-6)         | 0 (0-0)               | 0 (0-0)                 |                               |
| 2006 | Chad                     | 2734 (1923-3592)     |                            | 134 (94-176)                 |                                    | 1065 (455-1615)       |                             | 52 (22-79)                    |                                     | 4 (2-7)         | 0 (0-0)               | 0 (0-0)                 |                               |
| 2007 | Chad                     | 2713 (1908-3565)     |                            | 129 (91-169)                 |                                    | 1047 (452-1585)       |                             | 50 (21-75)                    |                                     | 4 (2-6)         | 0 (0-0)               | 0 (0-0)                 |                               |
| 2008 | Chad                     | 2616 (1840-3437)     |                            | 121 (85-159)                 |                                    | 1004 (438-1516)       |                             | 46 (20-70)                    |                                     | 4 (2-6)         | 0 (0-0)               | 0 (0-0)                 |                               |
| 2009 | Chad                     | 1552 (1091-2039)     |                            | 70 (49-92)                   |                                    | 592 (261-892)         |                             | 27 (12-40)                    |                                     | 2 (1-4)         | 0 (0-0)               | 0 (0-0)                 |                               |
| 2010 | Chad                     | 541 (390-711)        |                            | 24 (17-31)                   |                                    | 205 (91-308)          |                             | 9 (4-14)                      |                                     | 1 (0-1)         | 0 (0-0)               | 0 (0-0)                 |                               |
| 2011 | Chad                     | 962 (677-1264)       |                            | 41 (29-54)                   |                                    | 363 (163-543)         |                             | 15 (7-23)                     |                                     | 1 (1-2)         | 0 (0-0)               | 0 (0-0)                 |                               |
| 2012 | Chad                     | 455 (320-597)        |                            | 19 (13-25)                   |                                    | 170 (77-254)          |                             | 7 (3-11)                      |                                     | 1 (0-1)         | 0 (0-0)               | 0 (0-0)                 |                               |
| 2013 | Chad                     | 444 (312-584)        |                            | 18 (13-24)                   |                                    | 165 (60-271)          |                             | 7 (2-11)                      |                                     | 1 (0-1)         | 0 (0-0)               | 0 (0-0)                 |                               |
| 2014 | Chad                     | 453 (319-596)        |                            | 18 (13-24)                   |                                    | 167 (52-273)          |                             | 7 (2-11)                      |                                     | 1 (0-1)         | 0 (0-0)               | 0 (0-0)                 |                               |
| 2015 | Chad                     | 408 (287-535)        | 12 (8-15)                  | 16 (11-21)                   | 0 (0-1)                            | 150 (47-243)          | 4 (1-7)                     | 6 (2-9)                       | 0 (0-0)                             | 1 (0-1)         | 0 (0-0)               | 0 (0-0)                 |                               |
| 2000 | Chile                    | 4 (3-6)              |                            | 0 (0-0)                      |                                    | 1 (1-3)               |                             | 0 (0-0)                       |                                     | 0 (0-0)         | 0 (0-0)               | 0 (0-0)                 |                               |
| 2001 | Chile                    | 1 (0-1)              |                            | 0 (0-0)                      |                                    | 0 (0-0)               |                             | 0 (0-0)                       |                                     | 0 (0-0)         | 0 (0-0)               | 0 (0-0)                 |                               |
| 2002 | Chile                    | 0 (0-0)              |                            | 0 (0-0)                      |                                    | 0 (0-0)               |                             | 0 (0-0)                       |                                     | 0 (0-0)         | 0 (0-0)               | 0 (0-0)                 |                               |
| 2003 | Chile                    | 0 (0-0)              |                            | 0 (0-0)                      |                                    | 0 (0-0)               |                             | 0 (0-0)                       |                                     | 0 (0-0)         | 0 (0-0)               | 0 (0-0)                 |                               |
| 2004 | Chile                    | 0 (0-0)              |                            | 0 (0-0)                      |                                    | 0 (0-0)               |                             | 0 (0-0)                       |                                     | 0 (0-0)         | 0 (0-0)               | 0 (0-0)                 |                               |
| 2005 | Chile                    | 0 (0-0)              |                            | 0 (0-0)                      |                                    | 0 (0-0)               |                             | 0 (0-0)                       |                                     | 0 (0-0)         | 0 (0-0)               | 0 (0-0)                 |                               |
| 2006 | Chile                    | 0 (0-0)              |                            | 0 (0-0)                      |                                    | 0 (0-0)               |                             | 0 (0-0)                       |                                     | 0 (0-0)         | 0 (0-0)               | 0 (0-0)                 |                               |
| 2007 | Chile                    | 0 (0-0)              |                            | 0 (0-0)                      |                                    | 0 (0-0)               |                             | 0 (0-0)                       |                                     | 0 (0-0)         | 0 (0-0)               | 0 (0-0)                 |                               |
| 2008 | Chile                    | 0 (0-0)              |                            | 0 (0-0)                      |                                    | 0 (0-0)               |                             | 0 (0-0)                       |                                     | 0 (0-0)         | 0 (0-0)               | 0 (0-0)                 |                               |
| 2009 | Chile                    | 0 (0-0)              |                            | 0 (0-0)                      |                                    | 0 (0-0)               |                             | 0 (0-0)                       |                                     | 0 (0-0)         | 0 (0-0)               | 0 (0-0)                 |                               |
| 2010 | Chile                    | 0 (0-0)              |                            | 0 (0-0)                      |                                    | 0 (0-0)               |                             | 0 (0-0)                       |                                     | 0 (0-0)         | 0 (0-0)               | 0 (0-0)                 |                               |
| 2011 | Chile                    | 0 (0-0)              |                            | 0 (0-0)                      |                                    | 0 (0-0)               |                             | 0 (0-0)                       |                                     | 0 (0-0)         | 0 (0-0)               | 0 (0-0)                 |                               |
| 2012 | Chile                    | 0 (0-0)              |                            | 0 (0-0)                      |                                    | 0 (0-0)               |                             | 0 (0-0)                       |                                     | 0 (0-0)         | 0 (0-0)               | 0 (0-0)                 |                               |
| 2013 | Chile                    | 0 (0-0)              |                            | 0 (0-0)                      |                                    | 0 (0-0)               |                             | 0 (0-0)                       |                                     | 0 (0-0)         | 0 (0-0)               | 0 (0-0)                 |                               |
| 2014 | Chile                    | 0 (0-0)              |                            | 0 (0-0)                      |                                    | 0 (0-0)               |                             | 0 (0-0)                       |                                     | 0 (0-0)         | 0 (0-0)               | 0 (0-0)                 |                               |
| 2015 | Chile                    | 0 (0-0)              | 0 (0-0)                    | 0 (0-0)                      | 0 (0-0)                            | 0 (0-0)               | 0 (0-0)                     | 0 (0-0)                       | 0 (0-0)                             | 0 (0-0)         | 0 (0-0)               | 0 (0-0)                 |                               |
| 2000 | China                    | 10980 (7722-14427)   |                            | 14 (10-18)                   |                                    | 2315 (1309-3644)      |                             | 3 (2-5)                       |                                     | 18 (10-29)      | 0 (0-0)               | 0 (0-0)                 |                               |
| 2001 | China                    | 9542 (6711-12537)    |                            | 12 (9-16)                    |                                    | 1954 (1129-3143)      |                             | 3 (1-4)                       |                                     | 16 (9-25)       | 0 (0-0)               | 0 (0-0)                 |                               |
| 2002 | China                    | 8321 (5852-10933)    |                            | 11 (8-14)                    |                                    | 1635 (977-2720)       |                             | 2 (1-4)                       |                                     | 13 (8-22)       | 0 (0-0)               | 0 (0-0)                 |                               |
| 2003 | China                    | 7209 (5070-9473)     |                            | 10 (7-13)                    |                                    | 1343 (543-1790)       |                             | 2 (1-2)                       |                                     | 11 (4-14)       | 0 (0-0)               | 0 (0-0)                 |                               |
| 2004 | China                    | 6293 (4426-8268)     |                            | 8 (6-11)                     |                                    | 1076 (473-1560)       |                             | 1 (1-2)                       |                                     | 9 (4-12)        | 0 (0-0)               | 0 (0-0)                 |                               |
| 2005 | China                    | 5537 (3894-7275)     |                            | 7 (5-10)                     |                                    | 903 (433-1425)        |                             | 1 (1-2)                       |                                     | 7 (3-11)        | 0 (0-0)               | 0 (0-0)                 |                               |
| 2006 | China                    | 5111 (3595-6716)     |                            | 7 (5-9)                      |                                    | 839 (425-1401)        |                             | 1 (1-2)                       |                                     | 7 (3-11)        | 0 (0-0)               | 0 (0-0)                 |                               |
| 2007 | China                    | 4771 (3355-6268)     |                            | 6 (4-8)                      |                                    | 828 (419-1382)        |                             | 1 (1-2)                       |                                     | 7 (3-11)        | 0 (0-0)               | 0 (0-0)                 |                               |
| 2008 | China                    | 4503 (3167-5917)     |                            | 6 (4-8)                      |                                    | 849 (430-1418)        |                             | 1 (1-2)                       |                                     | 7 (3-11)        | 0 (0-0)               | 0 (0-0)                 |                               |
| 2009 | China                    | 4256 (2994-5593)     |                            | 6 (4-7)                      |                                    | 840 (426-1403)        |                             | 1 (1-2)                       |                                     | 7 (3-11)        | 0 (0-0)               | 0 (0-0)                 |                               |
| 2010 | China                    | 4034 (2837-5300)     |                            | 5 (4-7)                      |                                    | 829 (420-1384)        |                             | 1 (1-2)                       |                                     | 7 (3-11)        | 0 (0-0)               | 0 (0-0)                 |                               |
| 2011 | China                    | 3736 (2529-4909)     |                            | 5 (3-6)                      |                                    | 782 (396-1306)        |                             | 1 (1-2)                       |                                     | 6 (3-10)        | 0 (0-0)               | 0 (0-0)                 |                               |
| 2012 | China                    | 3444 (2422-4525)     |                            | 4 (3-6)                      |                                    | 705 (357-1177)        |                             | 1 (0-1)                       |                                     | 6 (3-9)         | 0 (0-0)               | 0 (0-0)                 |                               |
| 2013 | China                    | 3209 (2257-4217)     |                            | 4 (3-5)                      |                                    | 649 (329-1084)        |                             | 1 (0-1)                       |                                     | 5 (3-9)         | 0 (0-0)               | 0 (0-0)                 |                               |
| 2014 | China                    | 2948 (2073-3873)     |                            | 4 (3-5)                      |                                    | 582 (295-972)         |                             | 1 (0-1)                       |                                     | 5 (2-8)         | 0 (0-0)               | 0 (0-0)                 |                               |
| 2015 | China                    | 2797 (1967-3675)     | 1 (0-1)                    | 3 (2-4)                      | 0 (0-0)                            | 552 (280-922)         | 0 (0-0)                     | 1 (0-1)                       | 0 (0-0)                             | 4 (2-7)         | 0 (0-0)               | 0 (0-0)                 |                               |
| 2000 | Colombia                 | 58 (41-76)           |                            | 1 (1-2)                      |                                    | 28 (3-50)             |                             | 1 (0-1)                       |                                     | 0 (0-0)         | 0 (0-0)               | 0 (0-0)                 |                               |
| 2001 | Colombia                 | 57 (40-75)           |                            | 1 (1-2)                      |                                    | 30 (3-52)             |                             | 1 (0-1)                       |                                     | 0 (0-0)         | 0 (0-0)               | 0 (0-0)                 |                               |
| 2002 | Colombia                 | 38 (27-50)           |                            | 1 (1-1)                      |                                    | 25 (3-44)             |                             | 1 (0-1)                       |                                     | 0 (0-0)         | 0 (0-0)               | 0 (0-0)                 |                               |
| 2003 | Colombia                 | 4 (3-5)              |                            | 0 (0-0)                      |                                    | 2 (0-4)               |                             | 0 (0-0)                       |                                     | 0 (0-0)         | 0 (0-0)               | 0 (0-0)                 |                               |
| 2004 | Colombia                 | 4 (3-5)              |                            | 0 (0-0)                      |                                    | 2 (0-4)               |                             | 0 (0-0)                       |                                     | 0 (0-0)         | 0 (0-0)               | 0 (0-0)                 |                               |
| 2005 | Colombia                 | 4 (3-5)              |                            | 0 (0-0)                      |                                    | 2 (0-4)               |                             | 0 (0-0)                       |                                     | 0 (0-0)         | 0 (0-0)               | 0 (0-0)                 |                               |
| 2006 | Colombia                 | 4 (3-5)              |                            | 0 (0-0)                      |                                    | 2 (0-4)               |                             | 0 (0-0)                       |                                     | 0 (0-0)         | 0 (0-0)               | 0 (0-0)                 |                               |
| 2007 | Colombia                 | 3 (2-5)              |                            | 0 (0-0)                      |                                    | 2 (0-3)               |                             | 0 (0-0)                       |                                     | 0 (0-0)         | 0 (0-0)               | 0 (0-0)                 |                               |
| 2008 | Colombia                 | 3 (2-4)              |                            | 0 (0-0)                      |                                    | 2 (0-3)               |                             | 0 (0-0)                       |                                     | 0 (0-0)         | 0 (0-0)               | 0 (0-0)                 |                               |
| 2009 | Colombia                 | 3 (2-4)              |                            | 0 (0-0)                      |                                    | 1 (0-3)               |                             | 0 (0-0)                       |                                     | 0 (0-0)         | 0 (0-0)               | 0 (0-0)                 |                               |
| 2010 | Colombia                 | 3 (2-3)              |                            | 0 (0-0)                      |                                    | 1 (0-2)               |                             | 0 (0-0)                       |                                     | 0 (0-0)         | 0 (0-0)               | 0 (0-0)                 |                               |
| 2011 | Colombia                 | 3 (2-4)              |                            | 0 (0-0)                      |                                    | 1 (0-2)               |                             | 0 (0-0)                       |                                     | 0 (0-0)         | 0 (0-0)               | 0 (0-0)                 |                               |
| 2012 | Colombia                 | 3 (2-4)              |                            | 0 (0-0)                      |                                    | 1 (0-2)               |                             | 0 (0-0)                       |                                     | 0 (0-0)         | 0 (0-0)               | 0 (0-0)                 |                               |
| 2013 | Colombia                 | 3 (2-4)              |                            | 0 (0-0)                      |                                    | 1 (0-2)               |                             | 0 (0-0)                       |                                     | 0 (0-0)         | 0 (0-0)               | 0 (0-0)                 |                               |
| 2014 | Colombia                 | 3 (2-4)              |                            | 0 (0-0)                      |                                    | 1 (0-2)               |                             | 0 (0-0)                       |                                     | 0 (0-0)         | 0 (0-0)               | 0 (0-0)                 |                               |
| 2015 | Colombia                 | 3 (2-4)              | 0 (0-0)                    | 0 (0-0)                      | 0 (0-0)                            | 1 (0-2)               | 0 (0-0)                     | 0 (0-0)                       | 0 (0-0)                             | 0 (0-0)         | 0 (0-0)               | 0 (0-0)                 |                               |
| 2000 | Comoros                  | 42 (30-55)           |                            | 48 (34-63)                   |                                    | 17 (6-27)             |                             | 19 (7-31)                     |                                     | 0 (0-0)         | 0 (0-0)               | 0 (0-0)                 |                               |
| 2001 | Comoros                  | 43 (30-56)           |                            | 48 (33-62)                   |                                    | 17 (6-28)             |                             | 19 (7-31)                     |                                     | 0 (0-0)         | 0 (0-0)               | 0 (0-0)                 |                               |
| 2002 | Comoros                  | 44 (31-58)           |                            | 48 (34-63)                   |                                    | 18 (6-28)             |                             | 19 (7-31)                     |                                     | 0 (0-0)         | 0 (0-0)               | 0 (0-0)                 |                               |
| 2003 | Comoros                  | 45 (31-59)           |                            | 48 (34-63)                   |                                    | 18 (6-29)             |                             | 19 (7-31)                     |                                     | 0 (0-0)         | 0 (0-0)               | 0 (0-0)                 |                               |
| 2004 | Comoros                  | 45 (32-59)           |                            | 47 (33-62)                   |                                    | 18 (6-29)             |                             | 19 (7-31)                     |                                     | 0 (0-0)         | 0 (0-0)               | 0 (0-0)                 |                               |
| 2005 | Comoros                  | 45 (31-59)           |                            | 46 (32-61)                   |                                    | 18 (6-29)             |                             | 19 (6-30)                     |                                     | 0 (0-0)         | 0 (0-0)               | 0 (0-0)                 |                               |
| 2006 | Comoros                  | 44 (31-58)           |                            | 45 (32-59)                   |                                    | 18 (6-29)             |                             | 18 (6-29)                     |                                     | 0 (0-0)         | 0 (0-0)               | 0 (0-0)                 |                               |
| 2007 | Comoros                  | 44 (31-58)           |                            | 44 (31-57)                   |                                    | 18 (6-29)             |                             | 18 (6-29)                     |                                     | 0 (0-0)         | 0 (0-0)               | 0 (0-0)                 |                               |
| 2008 | Comoros                  | 44 (31-57)           |                            | 42 (30-56)                   |                                    | 18 (6-29)             |                             | 17 (6-28)                     |                                     | 0 (0-0)         | 0 (0-0)               | 0 (0-0)                 |                               |
| 2009 | Comoros                  | 29 (20-38)           |                            | 28 (19-36)                   |                                    | 12 (4-19)             |                             | 11 (4-18)                     |                                     | 0 (0-0)         | 0 (0-0)               | 0 (0-0)                 |                               |
| 2010 | Comoros                  | 5 (3-8)              |                            | 4 (3-8)                      |                                    | 2 (1-3)               |                             | 2 (1-3)                       |                                     | 0 (0-0)         | 0 (0-0)               | 0 (0-0)                 |                               |
| 2011 | Comoros                  | 4 (3-5)              |                            | 3 (2-5)                      |                                    | 2 (1-3)               |                             | 1 (0-2)                       |                                     | 0 (0-0)         | 0 (0-0)               | 0 (0-0)                 |                               |
| 2012 | Comoros                  | 3 (2-5)              |                            | 3 (2-4)                      |                                    | 1 (0-2)               |                             | 1 (0-2)                       |                                     | 0 (0-0)         | 0 (0-0)               | 0 (0-0)                 |                               |
| 2013 | Comoros                  | 4 (3-5)              |                            | 3 (2-4)                      |                                    | 2 (0-2)               |                             | 1 (0-2)                       |                                     | 0 (0-0)         | 0 (0-0)               | 0 (0-0)                 |                               |
| 2014 | Comoros                  | 0 (0-0)              |                            | 0 (0-0)                      |                                    | 0 (0-0)               |                             | 0 (0-0)                       |                                     | 0 (0-0)         | 0 (0-0)               | 0 (0-0)                 |                               |
| 2015 | Comoros                  | 0 (0-0)              | 0 (0-0)                    | 0 (0-0)                      | 0 (0-0)                            | 0 (0-0)               | 0 (0-0)                     | 0 (0-0)                       | 0 (0-0)                             | 0 (0-0)         | 0 (0-0)               | 0 (0-0)                 |                               |
| 2000 | Congo                    | 304 (214-399)        |                            | 61 (43-80)                   |                                    | 89 (29-144)           |                             | 18 (6-29)                     |                                     | 0 (0-1)         | 0 (0-0)               | 0 (0-0)                 |                               |
| 2001 | Congo                    | 314 (221-413)        |                            | 61 (43-80)                   |                                    | 93 (30-150)           |                             | 18 (6-29)                     |                                     | 0 (0-1)         | 0 (0-0)               | 0 (0-0)                 |                               |
| 2002 | Congo                    | 316 (222-415)        |                            | 60 (42-79)                   |                                    | 94 (31-151)           |                             | 18 (6-29)                     |                                     | 0 (0-1)         | 0 (0-0)               | 0 (0-0)                 |                               |
| 2003 | Congo                    | 310 (218-407)        |                            | 57 (40-76)                   |                                    | 92 (31-149)           |                             | 17 (6-28)                     |                                     | 0 (0-1)         | 0 (0-0)               | 0 (0-0)                 |                               |
| 2004 | Congo                    | 303 (213-398)        |                            | 55 (39-72)                   |                                    | 92 (31-147)           |                             | 17 (6-27)                     |                                     | 0 (0-1)         | 0 (0-0)               | 0 (0-0)                 |                               |
| 2005 | Congo                    | 292 (205-384)        |                            | 51 (36-68)                   |                                    | 89 (30-143)           |                             | 16 (5-25)                     |                                     | 0 (0-1)         | 0 (0-0)               | 0 (0-0)                 |                               |
| 2006 | Congo                    | 280 (197-367)        |                            | 48 (34-63)                   |                                    | 86 (29-138)           |                             | 15 (5-24)                     |                                     | 0 (0-1)         | 0 (0-0)               | 0 (0-0)                 |                               |

Hib = *Haemophilus influenzae* type b; npnm = non-pneumonia, non-meningitis; HIV = deaths only in HIV-infected children; Uncertainty range provided in parentheses.

| Year | Country       | Hib pneumonia deaths (HIV) | Hib pneumonia deaths (HIV) | Hib pneumonia mortality rate | Hib pneumonia mortality rate (HIV) | Hib meningitis deaths (HIV) | Hib meningitis deaths (HIV) | Hib meningitis mortality rate | Hib meningitis mortality rate (HIV) | Hib NPNM deaths | Hib NPNM deaths (HIV) | Hib NPNM mortality rate | Hib NPNM mortality rate (HIV) |
|------|---------------|----------------------------|----------------------------|------------------------------|------------------------------------|-----------------------------|-----------------------------|-------------------------------|-------------------------------------|-----------------|-----------------------|-------------------------|-------------------------------|
| 2007 | Congo         | 267 (188-351)              |                            | 44 (31-58)                   |                                    | 82 (28-132)                 |                             | 14 (5-22)                     |                                     | 0 (0-1)         |                       | 0 (0-0)                 |                               |
| 2008 | Congo         | 253 (178-332)              |                            | 41 (29-53)                   |                                    | 77 (24-128)                 |                             | 12 (4-20)                     |                                     | 1 (0-1)         |                       | 0 (0-0)                 |                               |
| 2009 | Congo         | 62 (44-82)                 |                            | 10 (7-13)                    |                                    | 19 (6-31)                   |                             | 3 (1-5)                       |                                     | 0 (0-0)         |                       | 0 (0-0)                 |                               |
| 2010 | Congo         | 24 (17-32)                 |                            | 4 (3-5)                      |                                    | 7 (2-12)                    |                             | 1 (0-2)                       |                                     | 0 (0-0)         |                       | 0 (0-0)                 |                               |
| 2011 | Congo         | 21 (14-27)                 |                            | 3 (2-4)                      |                                    | 6 (2-10)                    |                             | 1 (0-1)                       |                                     | 0 (0-0)         |                       | 0 (0-0)                 |                               |
| 2012 | Congo         | 20 (14-27)                 |                            | 3 (2-4)                      |                                    | 6 (2-10)                    |                             | 1 (0-1)                       |                                     | 0 (0-0)         |                       | 0 (0-0)                 |                               |
| 2013 | Congo         | 17 (12-23)                 |                            | 2 (2-3)                      |                                    | 5 (2-8)                     |                             | 1 (0-1)                       |                                     | 0 (0-0)         |                       | 0 (0-0)                 |                               |
| 2014 | Congo         | 2 (1-2)                    | 0 (0-0)                    | 0 (0-0)                      | 0 (0-0)                            | 1 (0-1)                     | 0 (0-0)                     | 0 (0-0)                       | 0 (0-0)                             | 0 (0-0)         | 0 (0-0)               | 0 (0-0)                 | 0 (0-0)                       |
| 2015 | Congo         | 2 (1-2)                    | 0 (0-0)                    | 0 (0-0)                      | 0 (0-0)                            | 1 (0-1)                     | 0 (0-0)                     | 0 (0-0)                       | 0 (0-0)                             | 0 (0-0)         | 0 (0-0)               | 0 (0-0)                 | 0 (0-0)                       |
| 2000 | Cook Islands  | 0 (0-0)                    |                            | 6 (4-8)                      |                                    | 0 (0-0)                     |                             | 2 (1-3)                       |                                     | 0 (0-0)         |                       | 0 (0-0)                 |                               |
| 2001 | Cook Islands  | 0 (0-0)                    |                            | 6 (4-8)                      |                                    | 0 (0-0)                     |                             | 2 (1-3)                       |                                     | 0 (0-0)         |                       | 0 (0-0)                 |                               |
| 2002 | Cook Islands  | 0 (0-0)                    |                            | 6 (4-8)                      |                                    | 0 (0-0)                     |                             | 2 (1-3)                       |                                     | 0 (0-0)         |                       | 0 (0-0)                 |                               |
| 2003 | Cook Islands  | 0 (0-0)                    |                            | 4 (3-5)                      |                                    | 0 (0-0)                     |                             | 1 (1-2)                       |                                     | 0 (0-0)         |                       | 0 (0-0)                 |                               |
| 2004 | Cook Islands  | 0 (0-0)                    |                            | 4 (3-5)                      |                                    | 0 (0-0)                     |                             | 1 (1-2)                       |                                     | 0 (0-0)         |                       | 0 (0-0)                 |                               |
| 2005 | Cook Islands  | 0 (0-0)                    |                            | 6 (4-8)                      |                                    | 0 (0-0)                     |                             | 2 (1-3)                       |                                     | 0 (0-0)         |                       | 0 (0-0)                 |                               |
| 2006 | Cook Islands  | 0 (0-0)                    |                            | 5 (3-6)                      |                                    | 0 (0-0)                     |                             | 2 (1-2)                       |                                     | 0 (0-0)         |                       | 0 (0-0)                 |                               |
| 2007 | Cook Islands  | 0 (0-0)                    |                            | 4 (3-5)                      |                                    | 0 (0-0)                     |                             | 1 (1-2)                       |                                     | 0 (0-0)         |                       | 0 (0-0)                 |                               |
| 2008 | Cook Islands  | 0 (0-0)                    |                            | 3 (2-4)                      |                                    | 0 (0-0)                     |                             | 1 (1-1)                       |                                     | 0 (0-0)         |                       | 0 (0-0)                 |                               |
| 2009 | Cook Islands  | 0 (0-0)                    |                            | 1 (0-1)                      |                                    | 0 (0-0)                     |                             | 0 (0-0)                       |                                     | 0 (0-0)         |                       | 0 (0-0)                 |                               |
| 2010 | Cook Islands  | 0 (0-0)                    |                            | 0 (0-0)                      |                                    | 0 (0-0)                     |                             | 0 (0-0)                       |                                     | 0 (0-0)         |                       | 0 (0-0)                 |                               |
| 2011 | Cook Islands  | 0 (0-0)                    |                            | 0 (0-0)                      |                                    | 0 (0-0)                     |                             | 0 (0-0)                       |                                     | 0 (0-0)         |                       | 0 (0-0)                 |                               |
| 2012 | Cook Islands  | 0 (0-0)                    |                            | 0 (0-0)                      |                                    | 0 (0-0)                     |                             | 0 (0-0)                       |                                     | 0 (0-0)         |                       | 0 (0-0)                 |                               |
| 2013 | Cook Islands  | 0 (0-0)                    |                            | 0 (0-0)                      |                                    | 0 (0-0)                     |                             | 0 (0-0)                       |                                     | 0 (0-0)         |                       | 0 (0-0)                 |                               |
| 2014 | Cook Islands  | 0 (0-0)                    |                            | 0 (0-0)                      |                                    | 0 (0-0)                     |                             | 0 (0-0)                       |                                     | 0 (0-0)         |                       | 0 (0-0)                 |                               |
| 2015 | Cook Islands  | 0 (0-0)                    | 0 (0-0)                    | 0 (0-0)                      | 0 (0-0)                            | 0 (0-0)                     | 0 (0-0)                     | 0 (0-0)                       | 0 (0-0)                             | 0 (0-0)         | 0 (0-0)               | 0 (0-0)                 | 0 (0-0)                       |
| 2000 | Costa Rica    | 1 (1-1)                    |                            | 0 (0-0)                      |                                    | 0 (0-1)                     |                             | 0 (0-0)                       |                                     | 0 (0-0)         |                       | 0 (0-0)                 |                               |
| 2001 | Costa Rica    | 1 (1-1)                    |                            | 0 (0-0)                      |                                    | 0 (0-1)                     |                             | 0 (0-0)                       |                                     | 0 (0-0)         |                       | 0 (0-0)                 |                               |
| 2002 | Costa Rica    | 1 (0-1)                    |                            | 0 (0-0)                      |                                    | 1 (0-1)                     |                             | 0 (0-0)                       |                                     | 0 (0-0)         |                       | 0 (0-0)                 |                               |
| 2003 | Costa Rica    | 0 (0-0)                    |                            | 0 (0-0)                      |                                    | 0 (0-0)                     |                             | 0 (0-0)                       |                                     | 0 (0-0)         |                       | 0 (0-0)                 |                               |
| 2004 | Costa Rica    | 0 (0-0)                    |                            | 0 (0-0)                      |                                    | 0 (0-0)                     |                             | 0 (0-0)                       |                                     | 0 (0-0)         |                       | 0 (0-0)                 |                               |
| 2005 | Costa Rica    | 0 (0-0)                    |                            | 0 (0-0)                      |                                    | 0 (0-0)                     |                             | 0 (0-0)                       |                                     | 0 (0-0)         |                       | 0 (0-0)                 |                               |
| 2006 | Costa Rica    | 0 (0-0)                    |                            | 0 (0-0)                      |                                    | 0 (0-0)                     |                             | 0 (0-0)                       |                                     | 0 (0-0)         |                       | 0 (0-0)                 |                               |
| 2007 | Costa Rica    | 0 (0-0)                    |                            | 0 (0-0)                      |                                    | 0 (0-0)                     |                             | 0 (0-0)                       |                                     | 0 (0-0)         |                       | 0 (0-0)                 |                               |
| 2008 | Costa Rica    | 0 (0-0)                    |                            | 0 (0-0)                      |                                    | 0 (0-0)                     |                             | 0 (0-0)                       |                                     | 0 (0-0)         |                       | 0 (0-0)                 |                               |
| 2009 | Costa Rica    | 0 (0-0)                    |                            | 0 (0-0)                      |                                    | 0 (0-0)                     |                             | 0 (0-0)                       |                                     | 0 (0-0)         |                       | 0 (0-0)                 |                               |
| 2010 | Costa Rica    | 0 (0-0)                    |                            | 0 (0-0)                      |                                    | 0 (0-0)                     |                             | 0 (0-0)                       |                                     | 0 (0-0)         |                       | 0 (0-0)                 |                               |
| 2011 | Costa Rica    | 0 (0-0)                    |                            | 0 (0-0)                      |                                    | 0 (0-0)                     |                             | 0 (0-0)                       |                                     | 0 (0-0)         |                       | 0 (0-0)                 |                               |
| 2012 | Costa Rica    | 0 (0-0)                    |                            | 0 (0-0)                      |                                    | 0 (0-0)                     |                             | 0 (0-0)                       |                                     | 0 (0-0)         |                       | 0 (0-0)                 |                               |
| 2013 | Costa Rica    | 0 (0-0)                    |                            | 0 (0-0)                      |                                    | 0 (0-0)                     |                             | 0 (0-0)                       |                                     | 0 (0-0)         |                       | 0 (0-0)                 |                               |
| 2014 | Costa Rica    | 0 (0-0)                    |                            | 0 (0-0)                      |                                    | 0 (0-0)                     |                             | 0 (0-0)                       |                                     | 0 (0-0)         |                       | 0 (0-0)                 |                               |
| 2015 | Costa Rica    | 0 (0-0)                    | 0 (0-0)                    | 0 (0-0)                      | 0 (0-0)                            | 0 (0-0)                     | 0 (0-0)                     | 0 (0-0)                       | 0 (0-0)                             | 0 (0-0)         | 0 (0-0)               | 0 (0-0)                 | 0 (0-0)                       |
| 2000 | Cote d'Ivoire | 1121 (788-1473)            |                            | 40 (28-53)                   |                                    | 370 (116-602)               |                             | 13 (4-22)                     |                                     | 2 (0-2)         |                       | 0 (0-0)                 |                               |
| 2001 | Cote d'Ivoire | 1104 (776-1450)            |                            | 38 (27-51)                   |                                    | 368 (115-599)               |                             | 13 (4-21)                     |                                     | 1 (0-2)         |                       | 0 (0-0)                 |                               |
| 2002 | Cote d'Ivoire | 1077 (757-1415)            |                            | 37 (26-48)                   |                                    | 362 (113-590)               |                             | 12 (4-20)                     |                                     | 1 (0-2)         |                       | 0 (0-0)                 |                               |
| 2003 | Cote d'Ivoire | 1052 (740-1383)            |                            | 36 (25-47)                   |                                    | 357 (111-582)               |                             | 12 (4-20)                     |                                     | 1 (0-2)         |                       | 0 (0-0)                 |                               |
| 2004 | Cote d'Ivoire | 1025 (721-1347)            |                            | 34 (24-45)                   |                                    | 349 (108-570)               |                             | 12 (4-19)                     |                                     | 1 (0-2)         |                       | 0 (0-0)                 |                               |
| 2005 | Cote d'Ivoire | 1034 (727-1359)            |                            | 34 (24-45)                   |                                    | 353 (109-577)               |                             | 12 (4-19)                     |                                     | 1 (0-2)         |                       | 0 (0-0)                 |                               |
| 2006 | Cote d'Ivoire | 1064 (748-1398)            |                            | 35 (24-46)                   |                                    | 363 (111-593)               |                             | 12 (4-19)                     |                                     | 1 (0-2)         |                       | 0 (0-0)                 |                               |
| 2007 | Cote d'Ivoire | 1126 (792-1480)            |                            | 38 (26-48)                   |                                    | 382 (118-624)               |                             | 12 (4-20)                     |                                     | 2 (0-3)         |                       | 0 (0-0)                 |                               |
| 2008 | Cote d'Ivoire | 1180 (830-1551)            |                            | 38 (27-50)                   |                                    | 400 (124-653)               |                             | 13 (4-21)                     |                                     | 2 (1-3)         |                       | 0 (0-0)                 |                               |
| 2009 | Cote d'Ivoire | 214 (150-281)              |                            | 7 (5-9)                      |                                    | 72 (23-118)                 |                             | 7 (4-10)                      |                                     | 0 (0-0)         |                       | 0 (0-0)                 |                               |
| 2010 | Cote d'Ivoire | 125 (88-164)               |                            | 4 (3-5)                      |                                    | 42 (13-89)                  |                             | 1 (0-2)                       |                                     | 0 (0-0)         |                       | 0 (0-0)                 |                               |
| 2011 | Cote d'Ivoire | 192 (135-252)              |                            | 6 (4-8)                      |                                    | 65 (20-105)                 |                             | 2 (1-3)                       |                                     | 0 (0-0)         |                       | 0 (0-0)                 |                               |
| 2012 | Cote d'Ivoire | 146 (103-192)              |                            | 4 (3-6)                      |                                    | 49 (15-80)                  |                             | 1 (0-2)                       |                                     | 0 (0-0)         |                       | 0 (0-0)                 |                               |
| 2013 | Cote d'Ivoire | 158 (111-207)              |                            | 5 (3-6)                      |                                    | 53 (17-86)                  |                             | 2 (0-2)                       |                                     | 0 (0-0)         |                       | 0 (0-0)                 |                               |
| 2014 | Cote d'Ivoire | 16 (11-21)                 |                            | 0 (0-1)                      |                                    | 5 (2-9)                     |                             | 0 (0-0)                       |                                     | 0 (0-0)         |                       | 0 (0-0)                 |                               |
| 2015 | Cote d'Ivoire | 16 (12-22)                 | 0 (0-1)                    | 0 (0-1)                      | 0 (0-0)                            | 5 (2-9)                     | 0 (0-0)                     | 0 (0-0)                       | 0 (0-0)                             | 0 (0-0)         | 0 (0-0)               | 0 (0-0)                 | 0 (0-0)                       |
| 2000 | Croatia       | 2 (1-2)                    |                            | 1 (1-1)                      |                                    | 1 (1-2)                     |                             | 1 (0-1)                       |                                     | 0 (0-0)         |                       | 0 (0-0)                 |                               |
| 2001 | Croatia       | 1 (1-2)                    |                            | 1 (0-1)                      |                                    | 1 (1-3)                     |                             | 1 (0-1)                       |                                     | 0 (0-0)         |                       | 0 (0-0)                 |                               |
| 2002 | Croatia       | 0 (0-0)                    |                            | 0 (0-0)                      |                                    | 0 (0-1)                     |                             | 0 (0-0)                       |                                     | 0 (0-0)         |                       | 0 (0-0)                 |                               |
| 2003 | Croatia       | 0 (0-0)                    |                            | 0 (0-0)                      |                                    | 0 (0-0)                     |                             | 0 (0-0)                       |                                     | 0 (0-0)         |                       | 0 (0-0)                 |                               |
| 2004 | Croatia       | 0 (0-0)                    |                            | 0 (0-0)                      |                                    | 0 (0-0)                     |                             | 0 (0-0)                       |                                     | 0 (0-0)         |                       | 0 (0-0)                 |                               |
| 2005 | Croatia       | 0 (0-0)                    |                            | 0 (0-0)                      |                                    | 0 (0-0)                     |                             | 0 (0-0)                       |                                     | 0 (0-0)         |                       | 0 (0-0)                 |                               |
| 2006 | Croatia       | 0 (0-0)                    |                            | 0 (0-0)                      |                                    | 0 (0-0)                     |                             | 0 (0-0)                       |                                     | 0 (0-0)         |                       | 0 (0-0)                 |                               |
| 2007 | Croatia       | 0 (0-0)                    |                            | 0 (0-0)                      |                                    | 0 (0-0)                     |                             | 0 (0-0)                       |                                     | 0 (0-0)         |                       | 0 (0-0)                 |                               |
| 2008 | Croatia       | 0 (0-0)                    |                            | 0 (0-0)                      |                                    | 0 (0-0)                     |                             | 0 (0-0)                       |                                     | 0 (0-0)         |                       | 0 (0-0)                 |                               |
| 2009 | Croatia       | 0 (0-0)                    |                            | 0 (0-0)                      |                                    | 0 (0-0)                     |                             | 0 (0-0)                       |                                     | 0 (0-0)         |                       | 0 (0-0)                 |                               |
| 2010 | Croatia       | 0 (0-0)                    |                            | 0 (0-0)                      |                                    | 0 (0-0)                     |                             | 0 (0-0)                       |                                     | 0 (0-0)         |                       | 0 (0-0)                 |                               |
| 2011 | Croatia       | 0 (0-0)                    |                            | 0 (0-0)                      |                                    | 0 (0-0)                     |                             | 0 (0-0)                       |                                     | 0 (0-0)         |                       | 0 (0-0)                 |                               |
| 2012 | Croatia       | 0 (0-0)                    |                            | 0 (0-0)                      |                                    | 0 (0-0)                     |                             | 0 (0-0)                       |                                     | 0 (0-0)         |                       | 0 (0-0)                 |                               |
| 2013 | Croatia       | 0 (0-0)                    |                            | 0 (0-0)                      |                                    | 0 (0-0)                     |                             | 0 (0-0)                       |                                     | 0 (0-0)         |                       | 0 (0-0)                 |                               |
| 2014 | Croatia       | 0 (0-0)                    |                            | 0 (0-0)                      |                                    | 0 (0-0)                     |                             | 0 (0-0)                       |                                     | 0 (0-0)         |                       | 0 (0-0)                 |                               |
| 2015 | Croatia       | 0 (0-0)                    | 0 (0-0)                    | 0 (0-0)                      | 0 (0-0)                            | 0 (0-0)                     | 0 (0-0)                     | 0 (0-0)                       | 0 (0-0)                             | 0 (0-0)         | 0 (0-0)               | 0 (0-0)                 | 0 (0-0)                       |
| 2000 | Cuba          | 1 (1-1)                    |                            | 0 (0-0)                      |                                    | 1 (0-2)                     |                             | 0 (0-0)                       |                                     | 0 (0-0)         |                       | 0 (0-0)                 |                               |
| 2001 | Cuba          | 1 (1-1)                    |                            | 0 (0-0)                      |                                    | 1 (0-1)                     |                             | 0 (0-0)                       |                                     | 0 (0-0)         |                       | 0 (0-0)                 |                               |
| 2002 | Cuba          | 1 (0-1)                    |                            | 0 (0-0)                      |                                    | 1 (0-1)                     |                             | 0 (0-0)                       |                                     | 0 (0-0)         |                       | 0 (0-0)                 |                               |
| 2003 | Cuba          | 1 (0-1)                    |                            | 0 (0-0)                      |                                    | 1 (0-1)                     |                             | 0 (0-0)                       |                                     | 0 (0-0)         |                       | 0 (0-0)                 |                               |
| 2004 | Cuba          | 0 (0-0)                    |                            | 0 (0-0)                      |                                    | 0 (0-0)                     |                             | 0 (0-0)                       |                                     | 0 (0-0)         |                       | 0 (0-0)                 |                               |
| 2005 | Cuba          | 0 (0-0)                    |                            | 0 (0-0)                      |                                    | 0 (0-0)                     |                             | 0 (0-0)                       |                                     | 0 (0-0)         |                       | 0 (0-0)                 |                               |
| 2006 | Cuba          | 0 (0-0)                    |                            | 0 (0-0)                      |                                    | 0 (0-0)                     |                             | 0 (0-0)                       |                                     | 0 (0-0)         |                       | 0 (0-0)                 |                               |
| 2007 | Cuba          | 0 (0-0)                    |                            | 0 (0-0)                      |                                    | 0 (0-0)                     |                             | 0 (0-0)                       |                                     | 0 (0-0)         |                       | 0 (0-0)                 |                               |
| 2008 | Cuba          | 0 (0-0)                    |                            | 0 (0-0)                      |                                    | 0 (0-0)                     |                             | 0 (0-0)                       |                                     | 0 (0-0)         |                       | 0 (0-0)                 |                               |
| 2009 | Cuba          | 0 (0-0)                    |                            | 0 (0-0)                      |                                    | 0 (0-0)                     |                             | 0 (0-0)                       |                                     | 0 (0-0)         |                       | 0 (0-0)                 |                               |
| 2010 | Cuba          | 0 (0-0)                    |                            | 0 (0-0)                      |                                    | 0 (0-0)                     |                             | 0 (0-0)                       |                                     | 0 (0-0)         |                       | 0 (0-0)                 |                               |
| 2011 | Cuba          | 0 (0-0)                    |                            | 0 (0-0)                      |                                    | 0 (0-0)                     |                             | 0 (0-0)                       |                                     | 0 (0-0)         |                       | 0 (0-0)                 |                               |
| 2012 | Cuba          | 0 (0-0)                    |                            | 0 (0-0)                      |                                    | 0 (0-0)                     |                             | 0 (0-0)                       |                                     | 0 (0-0)         |                       | 0 (0-0)                 |                               |
| 2013 | Cuba          | 0 (0-0)                    |                            | 0 (0-0)                      |                                    | 0 (0-0)                     |                             | 0 (0-0)                       |                                     | 0 (0-0)         |                       | 0 (0-0)                 |                               |
| 2014 | Cuba          | 0 (0-0)                    |                            | 0 (0-0)                      |                                    | 0 (0-0)                     |                             | 0 (0-0)                       |                                     | 0 (0-0)         |                       | 0 (0-0)                 |                               |

Hib = *Haemophilus influenzae* type b; npnm = non-pneumonia, non-meningitis; HIV = deaths only in HIV-infected children; Uncertainty range provided in parentheses.



| Year | Country                               | Hib pneumonia deaths (UR) | Hib pneumonia deaths, HIV (UR) | Hib pneumonia mortality rate (UR) | Hib pneumonia mortality rate, HIV (UR) | Hib meningitis deaths (UR) | Hib meningitis deaths, HIV (UR) | Hib meningitis mortality rate (UR) | Hib meningitis mortality rate, HIV (UR) | Hib NPNM deaths (UR) | Hib NPNM deaths, HIV (UR) | Hib NPNM mortality rate (UR) | Hib NPNM mortality rate, HIV (UR) | Hib NPNM mortality rate, HIV (UR) |
|------|---------------------------------------|---------------------------|--------------------------------|-----------------------------------|----------------------------------------|----------------------------|---------------------------------|------------------------------------|-----------------------------------------|----------------------|---------------------------|------------------------------|-----------------------------------|-----------------------------------|
| 2015 | Cuba                                  | 0 (0-0)                   | 0 (0-0)                        | 0 (0-0)                           | 0 (0-0)                                | 0 (0-0)                    | 0 (0-0)                         | 0 (0-0)                            | 0 (0-0)                                 | 0 (0-0)              | 0 (0-0)                   | 0 (0-0)                      | 0 (0-0)                           | 0 (0-0)                           |
| 2000 | Cyprus                                | 1 (0-1)                   |                                | 1 (1-1)                           |                                        | 0 (0-0)                    |                                 | 0 (0-1)                            |                                         | 0 (0-0)              |                           | 0 (0-0)                      |                                   | 0 (0-0)                           |
| 2001 | Cyprus                                | 0 (0-0)                   |                                | 0 (0-0)                           |                                        | 0 (0-0)                    |                                 | 0 (0-0)                            |                                         | 0 (0-0)              |                           | 0 (0-0)                      |                                   | 0 (0-0)                           |
| 2002 | Cyprus                                | 0 (0-0)                   |                                | 0 (0-0)                           |                                        | 0 (0-0)                    |                                 | 0 (0-0)                            |                                         | 0 (0-0)              |                           | 0 (0-0)                      |                                   | 0 (0-0)                           |
| 2003 | Cyprus                                | 0 (0-0)                   |                                | 0 (0-0)                           |                                        | 0 (0-0)                    |                                 | 0 (0-0)                            |                                         | 0 (0-0)              |                           | 0 (0-0)                      |                                   | 0 (0-0)                           |
| 2004 | Cyprus                                | 0 (0-0)                   |                                | 0 (0-0)                           |                                        | 0 (0-0)                    |                                 | 0 (0-0)                            |                                         | 0 (0-0)              |                           | 0 (0-0)                      |                                   | 0 (0-0)                           |
| 2005 | Cyprus                                | 0 (0-0)                   |                                | 0 (0-0)                           |                                        | 0 (0-0)                    |                                 | 0 (0-0)                            |                                         | 0 (0-0)              |                           | 0 (0-0)                      |                                   | 0 (0-0)                           |
| 2006 | Cyprus                                | 0 (0-0)                   |                                | 0 (0-0)                           |                                        | 0 (0-0)                    |                                 | 0 (0-0)                            |                                         | 0 (0-0)              |                           | 0 (0-0)                      |                                   | 0 (0-0)                           |
| 2007 | Cyprus                                | 0 (0-0)                   |                                | 0 (0-0)                           |                                        | 0 (0-0)                    |                                 | 0 (0-0)                            |                                         | 0 (0-0)              |                           | 0 (0-0)                      |                                   | 0 (0-0)                           |
| 2008 | Cyprus                                | 0 (0-0)                   |                                | 0 (0-0)                           |                                        | 0 (0-0)                    |                                 | 0 (0-0)                            |                                         | 0 (0-0)              |                           | 0 (0-0)                      |                                   | 0 (0-0)                           |
| 2009 | Cyprus                                | 0 (0-0)                   |                                | 0 (0-0)                           |                                        | 0 (0-0)                    |                                 | 0 (0-0)                            |                                         | 0 (0-0)              |                           | 0 (0-0)                      |                                   | 0 (0-0)                           |
| 2010 | Cyprus                                | 0 (0-0)                   |                                | 0 (0-0)                           |                                        | 0 (0-0)                    |                                 | 0 (0-0)                            |                                         | 0 (0-0)              |                           | 0 (0-0)                      |                                   | 0 (0-0)                           |
| 2011 | Cyprus                                | 0 (0-0)                   |                                | 0 (0-0)                           |                                        | 0 (0-0)                    |                                 | 0 (0-0)                            |                                         | 0 (0-0)              |                           | 0 (0-0)                      |                                   | 0 (0-0)                           |
| 2012 | Cyprus                                | 0 (0-0)                   |                                | 0 (0-0)                           |                                        | 0 (0-0)                    |                                 | 0 (0-0)                            |                                         | 0 (0-0)              |                           | 0 (0-0)                      |                                   | 0 (0-0)                           |
| 2013 | Cyprus                                | 0 (0-0)                   |                                | 0 (0-0)                           |                                        | 0 (0-0)                    |                                 | 0 (0-0)                            |                                         | 0 (0-0)              |                           | 0 (0-0)                      |                                   | 0 (0-0)                           |
| 2014 | Cyprus                                | 0 (0-0)                   |                                | 0 (0-0)                           |                                        | 0 (0-0)                    |                                 | 0 (0-0)                            |                                         | 0 (0-0)              |                           | 0 (0-0)                      |                                   | 0 (0-0)                           |
| 2015 | Cyprus                                | 0 (0-0)                   | 0 (0-0)                        | 0 (0-0)                           | 0 (0-0)                                | 0 (0-0)                    | 0 (0-0)                         | 0 (0-0)                            | 0 (0-0)                                 | 0 (0-0)              | 0 (0-0)                   | 0 (0-0)                      | 0 (0-0)                           | 0 (0-0)                           |
| 2000 | Czech Republic                        | 3 (2-4)                   |                                | 1 (0-1)                           |                                        | 2 (1-3)                    |                                 | 0 (0-1)                            |                                         | 0 (0-0)              |                           | 0 (0-0)                      |                                   | 0 (0-0)                           |
| 2001 | Czech Republic                        | 3 (2-4)                   |                                | 1 (1-1)                           |                                        | 2 (1-3)                    |                                 | 0 (0-1)                            |                                         | 0 (0-0)              |                           | 0 (0-0)                      |                                   | 0 (0-0)                           |
| 2002 | Czech Republic                        | 1 (0-1)                   |                                | 0 (0-0)                           |                                        | 0 (0-0)                    |                                 | 0 (0-0)                            |                                         | 0 (0-0)              |                           | 0 (0-0)                      |                                   | 0 (0-0)                           |
| 2003 | Czech Republic                        | 0 (0-0)                   |                                | 0 (0-0)                           |                                        | 0 (0-0)                    |                                 | 0 (0-0)                            |                                         | 0 (0-0)              |                           | 0 (0-0)                      |                                   | 0 (0-0)                           |
| 2004 | Czech Republic                        | 0 (0-0)                   |                                | 0 (0-0)                           |                                        | 0 (0-0)                    |                                 | 0 (0-0)                            |                                         | 0 (0-0)              |                           | 0 (0-0)                      |                                   | 0 (0-0)                           |
| 2005 | Czech Republic                        | 0 (0-0)                   |                                | 0 (0-0)                           |                                        | 0 (0-0)                    |                                 | 0 (0-0)                            |                                         | 0 (0-0)              |                           | 0 (0-0)                      |                                   | 0 (0-0)                           |
| 2006 | Czech Republic                        | 0 (0-0)                   |                                | 0 (0-0)                           |                                        | 0 (0-0)                    |                                 | 0 (0-0)                            |                                         | 0 (0-0)              |                           | 0 (0-0)                      |                                   | 0 (0-0)                           |
| 2007 | Czech Republic                        | 0 (0-0)                   |                                | 0 (0-0)                           |                                        | 0 (0-0)                    |                                 | 0 (0-0)                            |                                         | 0 (0-0)              |                           | 0 (0-0)                      |                                   | 0 (0-0)                           |
| 2008 | Czech Republic                        | 0 (0-0)                   |                                | 0 (0-0)                           |                                        | 0 (0-0)                    |                                 | 0 (0-0)                            |                                         | 0 (0-0)              |                           | 0 (0-0)                      |                                   | 0 (0-0)                           |
| 2009 | Czech Republic                        | 0 (0-0)                   |                                | 0 (0-0)                           |                                        | 0 (0-0)                    |                                 | 0 (0-0)                            |                                         | 0 (0-0)              |                           | 0 (0-0)                      |                                   | 0 (0-0)                           |
| 2010 | Czech Republic                        | 0 (0-0)                   |                                | 0 (0-0)                           |                                        | 0 (0-0)                    |                                 | 0 (0-0)                            |                                         | 0 (0-0)              |                           | 0 (0-0)                      |                                   | 0 (0-0)                           |
| 2011 | Czech Republic                        | 0 (0-0)                   |                                | 0 (0-0)                           |                                        | 0 (0-0)                    |                                 | 0 (0-0)                            |                                         | 0 (0-0)              |                           | 0 (0-0)                      |                                   | 0 (0-0)                           |
| 2012 | Czech Republic                        | 0 (0-0)                   |                                | 0 (0-0)                           |                                        | 0 (0-0)                    |                                 | 0 (0-0)                            |                                         | 0 (0-0)              |                           | 0 (0-0)                      |                                   | 0 (0-0)                           |
| 2013 | Czech Republic                        | 0 (0-0)                   |                                | 0 (0-0)                           |                                        | 0 (0-0)                    |                                 | 0 (0-0)                            |                                         | 0 (0-0)              |                           | 0 (0-0)                      |                                   | 0 (0-0)                           |
| 2014 | Czech Republic                        | 0 (0-0)                   |                                | 0 (0-0)                           |                                        | 0 (0-0)                    |                                 | 0 (0-0)                            |                                         | 0 (0-0)              |                           | 0 (0-0)                      |                                   | 0 (0-0)                           |
| 2015 | Czech Republic                        | 0 (0-0)                   | 0 (0-0)                        | 0 (0-0)                           | 0 (0-0)                                | 0 (0-0)                    | 0 (0-0)                         | 0 (0-0)                            | 0 (0-0)                                 | 0 (0-0)              | 0 (0-0)                   | 0 (0-0)                      | 0 (0-0)                           | 0 (0-0)                           |
| 2000 | Democratic People's Republic of Korea | 645 (454-848)             |                                | 33 (23-43)                        |                                        | 251 (139-388)              |                                 | 13 (7-20)                          |                                         | 2 (1-3)              |                           | 0 (0-0)                      |                                   | 0 (0-0)                           |
| 2001 | Democratic People's Republic of Korea | 527 (371-693)             |                                | 28 (19-36)                        |                                        | 209 (115-320)              |                                 | 11 (6-17)                          |                                         | 2 (1-3)              |                           | 0 (0-0)                      |                                   | 0 (0-0)                           |
| 2002 | Democratic People's Republic of Korea | 432 (304-567)             |                                | 23 (16-30)                        |                                        | 173 (99-261)               |                                 | 9 (5-14)                           |                                         | 1 (1-2)              |                           | 0 (0-0)                      |                                   | 0 (0-0)                           |
| 2003 | Democratic People's Republic of Korea | 362 (255-476)             |                                | 19 (14-25)                        |                                        | 147 (82-218)               |                                 | 8 (4-12)                           |                                         | 1 (1-2)              |                           | 0 (0-0)                      |                                   | 0 (0-0)                           |
| 2004 | Democratic People's Republic of Korea | 316 (222-415)             |                                | 17 (12-22)                        |                                        | 130 (69-189)               |                                 | 7 (4-10)                           |                                         | 1 (1-2)              |                           | 0 (0-0)                      |                                   | 0 (0-0)                           |
| 2005 | Democratic People's Republic of Korea | 298 (209-391)             |                                | 16 (11-21)                        |                                        | 124 (63-179)               |                                 | 7 (3-10)                           |                                         | 1 (1-1)              |                           | 0 (0-0)                      |                                   | 0 (0-0)                           |
| 2006 | Democratic People's Republic of Korea | 290 (204-381)             |                                | 16 (11-21)                        |                                        | 122 (59-178)               |                                 | 7 (3-10)                           |                                         | 1 (0-1)              |                           | 0 (0-0)                      |                                   | 0 (0-0)                           |
| 2007 | Democratic People's Republic of Korea | 285 (200-374)             |                                | 16 (11-21)                        |                                        | 121 (56-179)               |                                 | 7 (3-10)                           |                                         | 1 (0-1)              |                           | 0 (0-0)                      |                                   | 0 (0-0)                           |
| 2008 | Democratic People's Republic of Korea | 274 (193-361)             |                                | 16 (11-21)                        |                                        | 117 (53-176)               |                                 | 7 (3-10)                           |                                         | 1 (0-1)              |                           | 0 (0-0)                      |                                   | 0 (0-0)                           |
| 2009 | Democratic People's Republic of Korea | 264 (186-347)             |                                | 15 (11-20)                        |                                        | 113 (49-172)               |                                 | 7 (3-10)                           |                                         | 1 (0-1)              |                           | 0 (0-0)                      |                                   | 0 (0-0)                           |
| 2010 | Democratic People's Republic of Korea | 255 (179-335)             |                                | 15 (11-20)                        |                                        | 109 (46-168)               |                                 | 6 (3-10)                           |                                         | 1 (0-1)              |                           | 0 (0-0)                      |                                   | 0 (0-0)                           |
| 2011 | Democratic People's Republic of Korea | 247 (173-324)             |                                | 15 (10-19)                        |                                        | 106 (43-165)               |                                 | 6 (3-10)                           |                                         | 1 (0-1)              |                           | 0 (0-0)                      |                                   | 0 (0-0)                           |
| 2012 | Democratic People's Republic of Korea | 179 (126-235)             |                                | 11 (8-14)                         |                                        | 76 (13-127)                |                                 | 5 (1-8)                            |                                         | 1 (0-1)              |                           | 0 (0-0)                      |                                   | 0 (0-0)                           |
| 2013 | Democratic People's Republic of Korea | 18 (13-24)                |                                | 1 (1-1)                           |                                        | 8 (1-13)                   |                                 | 0 (0-1)                            |                                         | 0 (0-0)              |                           | 0 (0-0)                      |                                   | 0 (0-0)                           |
| 2014 | Democratic People's Republic of Korea | 18 (12-23)                |                                | 1 (1-1)                           |                                        | 7 (1-13)                   |                                 | 0 (0-1)                            |                                         | 0 (0-0)              |                           | 0 (0-0)                      |                                   | 0 (0-0)                           |
| 2015 | Democratic People's Republic of Korea | 16 (11-21)                | 0 (0-0)                        | 1 (1-1)                           | 0 (0-0)                                | 7 (1-11)                   | 0 (0-0)                         | 0 (0-1)                            | 0 (0-0)                                 | 0 (0-0)              | 0 (0-0)                   | 0 (0-0)                      | 0 (0-0)                           | 0 (0-0)                           |
| 2000 | Democratic Republic of the Congo      | 5958 (4190-7828)          |                                | 67 (47-88)                        |                                        | 3160 (1471-4693)           |                                 | 35 (16-53)                         |                                         | 13 (6-19)            |                           | 0 (0-0)                      |                                   | 0 (0-0)                           |
| 2001 | Democratic Republic of the Congo      | 5800 (4079-7521)          |                                | 63 (44-83)                        |                                        | 3106 (1446-4608)           |                                 | 34 (16-50)                         |                                         | 13 (6-19)            |                           | 0 (0-0)                      |                                   | 0 (0-0)                           |
| 2002 | Democratic Republic of the Congo      | 5756 (4048-7563)          |                                | 61 (43-80)                        |                                        | 3094 (1448-4582)           |                                 | 33 (15-48)                         |                                         | 13 (6-19)            |                           | 0 (0-0)                      |                                   | 0 (0-0)                           |
| 2003 | Democratic Republic of the Congo      | 5682 (3996-7465)          |                                | 58 (41-76)                        |                                        | 3049 (1456-4597)           |                                 | 31 (10-51)                         |                                         | 12 (4-20)            |                           | 0 (0-0)                      |                                   | 0 (0-0)                           |
| 2004 | Democratic Republic of the Congo      | 5715 (4020-7510)          |                                | 57 (40-74)                        |                                        | 3056 (1469-4570)           |                                 | 30 (10-49)                         |                                         | 12 (4-20)            |                           | 0 (0-0)                      |                                   | 0 (0-0)                           |
| 2005 | Democratic Republic of the Congo      | 5528 (3888-7263)          |                                | 53 (37-70)                        |                                        | 2941 (1339-4774)           |                                 | 28 (9-46)                          |                                         | 12 (4-19)            |                           | 0 (0-0)                      |                                   | 0 (0-0)                           |
| 2006 | Democratic Republic of the Congo      | 5675 (3991-7457)          |                                | 53 (37-69)                        |                                        | 3002 (1466-4866)           |                                 | 28 (9-45)                          |                                         | 12 (4-20)            |                           | 0 (0-0)                      |                                   | 0 (0-0)                           |
| 2007 | Democratic Republic of the Congo      | 5726 (4027-7523)          |                                | 51 (36-68)                        |                                        | 3014 (1476-4875)           |                                 | 27 (9-44)                          |                                         | 12 (4-20)            |                           | 0 (0-0)                      |                                   | 0 (0-0)                           |
| 2008 | Democratic Republic of the Congo      | 6079 (4275-7887)          |                                | 53 (37-70)                        |                                        | 3183 (1527-5156)           |                                 | 28 (9-45)                          |                                         | 13 (4-21)            |                           | 0 (0-0)                      |                                   | 0 (0-0)                           |
| 2009 | Democratic Republic of the Congo      | 1790 (1259-2352)          |                                | 15 (11-20)                        |                                        | 932 (300-1512)             |                                 | 8 (3-13)                           |                                         | 4 (1-6)              |                           | 0 (0-0)                      |                                   | 0 (0-0)                           |
| 2010 | Democratic Republic of the Congo      | 992 (698-1303)            |                                | 8 (6-11)                          |                                        | 513 (164-833)              |                                 | 4 (1-7)                            |                                         | 2 (1-3)              |                           | 0 (0-0)                      |                                   | 0 (0-0)                           |
| 2011 | Democratic Republic of the Congo      | 887 (624-1166)            |                                | 7 (5-9)                           |                                        | 456 (146-739)              |                                 | 4 (1-6)                            |                                         | 2 (1-3)              |                           | 0 (0-0)                      |                                   | 0 (0-0)                           |
| 2012 | Democratic Republic of the Congo      | 938 (660-1233)            |                                | 7 (5-10)                          |                                        | 477 (154-773)              |                                 | 4 (1-6)                            |                                         | 2 (1-3)              |                           | 0 (0-0)                      |                                   | 0 (0-0)                           |
| 2013 | Democratic Republic of the Congo      | 981 (690-1288)            |                                | 8 (5-10)                          |                                        | 494 (160-800)              |                                 | 4 (1-6)                            |                                         | 2 (1-3)              |                           | 0 (0-0)                      |                                   | 0 (0-0)                           |
| 2014 | Democratic Republic of the Congo      | 93 (65-122)               |                                | 1 (0-1)                           |                                        | 46 (15-75)                 |                                 | 0 (0-1)                            |                                         | 0 (0-0)              |                           | 0 (0-0)                      |                                   | 0 (0-0)                           |
| 2015 | Democratic Republic of the Congo      | 93 (65-122)               | 1 (1-1)                        | 1 (0-1)                           | 0 (0-0)                                | 46 (15-75)                 | 1 (0-1)                         | 0 (0-1)                            | 0 (0-0)                                 | 0 (0-0)              | 0 (0-0)                   | 0 (0-0)                      | 0 (0-0)                           | 0 (0-0)                           |
| 2000 | Denmark                               | 0 (0-0)                   |                                | 0 (0-0)                           |                                        | 0 (0-0)                    |                                 | 0 (0-0)                            |                                         | 0 (0-0)              |                           | 0 (0-0)                      |                                   | 0 (0-0)                           |
| 2001 | Denmark                               | 0 (0-0)                   |                                | 0 (0-0)                           |                                        | 0 (0-0)                    |                                 | 0 (0-0)                            |                                         | 0 (0-0)              |                           | 0 (0-0)                      |                                   | 0 (0-0)                           |
| 2002 | Denmark                               | 0 (0-0)                   |                                | 0 (0-0)                           |                                        | 0 (0-0)                    |                                 | 0 (0-0)                            |                                         | 0 (0-0)              |                           | 0 (0-0)                      |                                   | 0 (0-0)                           |
| 2003 | Denmark                               | 0 (0-0)                   |                                | 0 (0-0)                           |                                        | 0 (0-0)                    |                                 | 0 (0-0)                            |                                         | 0 (0-0)              |                           | 0 (0-0)                      |                                   | 0 (0-0)                           |
| 2004 | Denmark                               | 0 (0-0)                   |                                | 0 (0-0)                           |                                        | 0 (0-0)                    |                                 | 0 (0-0)                            |                                         | 0 (0-0)              |                           | 0 (0-0)                      |                                   | 0 (0-0)                           |
| 2005 | Denmark                               | 0 (0-0)                   |                                | 0 (0-0)                           |                                        | 0 (0-0)                    |                                 | 0 (0-0)                            |                                         | 0 (0-0)              |                           | 0 (0-0)                      |                                   | 0 (0-0)                           |
| 2006 | Denmark                               | 0 (0-0)                   |                                | 0 (0-0)                           |                                        | 0 (0-0)                    |                                 | 0 (0-0)                            |                                         | 0 (0-0)              |                           | 0 (0-0)                      |                                   | 0 (0-0)                           |
| 2007 | Denmark                               | 0 (0-0)                   |                                | 0 (0-0)                           |                                        | 0 (0-0)                    |                                 | 0 (0-0)                            |                                         | 0 (0-0)              |                           | 0 (0-0)                      |                                   | 0 (0-0)                           |
| 2008 | Denmark                               | 0 (0-0)                   |                                | 0 (0-0)                           |                                        | 0 (0-0)                    |                                 | 0 (0-0)                            |                                         | 0 (0-0)              |                           | 0 (0-0)                      |                                   | 0 (0-0)                           |
| 2009 | Denmark                               | 0 (0-0)                   |                                | 0 (0-0)                           |                                        | 0 (0-0)                    |                                 | 0 (0-0)                            |                                         | 0 (0-0)              |                           | 0 (0-0)                      |                                   | 0 (0-0)                           |
| 2010 | Denmark                               | 0 (0-0)                   |                                | 0 (0-0)                           |                                        | 0 (0-0)                    |                                 | 0 (0-0)                            |                                         | 0 (0-0)              |                           | 0 (0-0)                      |                                   | 0 (0-0)                           |
| 2011 | Denmark                               | 0 (0-0)                   |                                | 0 (0-0)                           |                                        | 0 (0-0)                    |                                 | 0 (0-0)                            |                                         | 0 (0-0)              |                           | 0 (0-0)                      |                                   | 0 (0-0)                           |
| 2012 | Denmark                               | 0 (0-0)                   |                                | 0 (0-0)                           |                                        | 0 (0-0)                    |                                 | 0 (0-0)                            |                                         | 0 (0-0)              |                           | 0 (0-0)                      |                                   | 0 (0-0)                           |
| 2013 | Denmark                               | 0 (0-0)                   |                                | 0 (0-0)                           |                                        | 0 (0-0)                    |                                 | 0 (0-0)                            |                                         | 0 (0-0)              |                           | 0 (0-0)                      |                                   | 0 (0-0)                           |
| 2014 | Denmark                               | 0 (0-0)                   |                                | 0 (0-0)                           |                                        | 0 (0-0)                    |                                 | 0 (0-0)                            |                                         | 0 (0-0)              |                           | 0 (0-0)                      |                                   | 0 (0-0)                           |
| 2015 | Denmark                               | 0 (0-0)                   | 0 (0-0)                        | 0 (0-0)                           | 0 (0-0)                                | 0 (0-0)                    | 0 (0-0)                         | 0 (0-0)                            | 0 (0-0)                                 | 0 (0-0)              | 0 (0-0)                   | 0 (0-0)                      | 0 (0-0)                           | 0 (0-0)                           |
| 2000 | Djibouti                              | 50 (35-66)                |                                | 50 (36-66)                        |                                        | 18 (7-28)                  |                                 | 18 (7-28)                          |                                         | 0 (0-0)              |                           | 0 (0-0)                      |                                   | 0 (0-0)                           |
| 2001 | Djibouti                              | 49 (34-64)                |                                | 50 (35-65)                        |                                        | 17 (7-27)                  |                                 | 18 (7-27)                          |                                         | 0 (0-0)              |                           | 0 (0-0)                      |                                   | 0 (0-0)                           |
| 2002 | Djibouti                              | 48 (34-63)                |                                | 49 (34-64)                        |                                        | 17 (7-27)                  |                                 | 17 (7-27)                          |                                         | 0 (0-0)              |                           | 0 (0-0)                      |                                   | 0 (0-0)                           |
| 2003 | Djibouti                              | 47 (33-62)                |                                | 48 (34-63)                        |                                        | 17 (6-26)                  |                                 | 17 (7-26)                          |                                         | 0 (0-0)              |                           | 0 (0-0)                      |                                   | 0 (0-0)                           |
| 2004 | Djib                                  |                           |                                |                                   |                                        |                            |                                 |                                    |                                         |                      |                           |                              |                                   |                                   |

| Year | Country            | Hib pneumonia deaths (UR) | Hib pneumonia deaths, HIV (UR) | Hib pneumonia mortality rate (UR) | Hib pneumonia mortality rate, HIV (UR) | Hib meningitis deaths (UR) | Hib meningitis deaths, HIV (UR) | Hib meningitis mortality rate (UR) | Hib meningitis mortality rate, HIV (UR) | Hib NPNM deaths (UR) | Hib NPNM deaths, HIV (UR) | Hib NPNM mortality rate (UR) | Hib NPNM mortality rate, HIV (UR) |
|------|--------------------|---------------------------|--------------------------------|-----------------------------------|----------------------------------------|----------------------------|---------------------------------|------------------------------------|-----------------------------------------|----------------------|---------------------------|------------------------------|-----------------------------------|
| 2007 | Djibouti           | 34 (24-45)                |                                | 35 (25-46)                        |                                        | 12 (5-18)                  |                                 | 12 (5-18)                          |                                         | 0 (0-0)              |                           | 0 (0-0)                      |                                   |
| 2008 | Djibouti           | 3 (2-4)                   |                                | 3 (2-4)                           |                                        | 1 (0-2)                    |                                 | 1 (0-2)                            |                                         | 0 (0-0)              |                           | 0 (0-0)                      |                                   |
| 2009 | Djibouti           | 3 (2-4)                   |                                | 3 (2-4)                           |                                        | 1 (0-2)                    |                                 | 1 (0-2)                            |                                         | 0 (0-0)              |                           | 0 (0-0)                      |                                   |
| 2010 | Djibouti           | 3 (2-4)                   |                                | 3 (2-4)                           |                                        | 1 (0-1)                    |                                 | 1 (1-2)                            |                                         | 0 (0-0)              |                           | 0 (0-0)                      |                                   |
| 2011 | Djibouti           | 3 (2-4)                   |                                | 3 (2-4)                           |                                        | 1 (0-1)                    |                                 | 1 (1-1)                            |                                         | 0 (0-0)              |                           | 0 (0-0)                      |                                   |
| 2012 | Djibouti           | 0 (0-0)                   |                                | 0 (0-0)                           |                                        | 0 (0-0)                    |                                 | 0 (0-0)                            |                                         | 0 (0-0)              |                           | 0 (0-0)                      |                                   |
| 2013 | Djibouti           | 0 (0-0)                   |                                | 0 (0-0)                           |                                        | 0 (0-0)                    |                                 | 0 (0-0)                            |                                         | 0 (0-0)              |                           | 0 (0-0)                      |                                   |
| 2014 | Djibouti           | 0 (0-0)                   |                                | 0 (0-0)                           |                                        | 0 (0-0)                    |                                 | 0 (0-0)                            |                                         | 0 (0-0)              |                           | 0 (0-0)                      |                                   |
| 2015 | Djibouti           | 0 (0-0)                   | 0 (0-0)                        | 0 (0-0)                           | 0 (0-0)                                | 0 (0-0)                    | 0 (0-0)                         | 0 (0-0)                            | 0 (0-0)                                 | 0 (0-0)              | 0 (0-0)                   | 0 (0-0)                      | 0 (0-0)                           |
| 2000 | Dominica           | 0 (0-0)                   |                                | 2 (1-2)                           |                                        | 0 (0-0)                    |                                 | 0 (0-0)                            |                                         | 0 (0-0)              |                           | 0 (0-0)                      |                                   |
| 2001 | Dominica           | 0 (0-0)                   |                                | 2 (1-2)                           |                                        | 0 (0-0)                    |                                 | 2 (1-3)                            |                                         | 0 (0-0)              |                           | 0 (0-0)                      |                                   |
| 2002 | Dominica           | 0 (0-0)                   |                                | 1 (0-1)                           |                                        | 0 (0-0)                    |                                 | 1 (1-3)                            |                                         | 0 (0-0)              |                           | 0 (0-0)                      |                                   |
| 2003 | Dominica           | 0 (0-0)                   |                                | 0 (0-0)                           |                                        | 0 (0-0)                    |                                 | 2 (1-3)                            |                                         | 0 (0-0)              |                           | 0 (0-0)                      |                                   |
| 2004 | Dominica           | 0 (0-0)                   |                                | 1 (1-2)                           |                                        | 0 (0-0)                    |                                 | 0 (0-0)                            |                                         | 0 (0-0)              |                           | 0 (0-0)                      |                                   |
| 2005 | Dominica           | 0 (0-0)                   |                                | 2 (2-3)                           |                                        | 0 (0-0)                    |                                 | 0 (0-0)                            |                                         | 0 (0-0)              |                           | 0 (0-0)                      |                                   |
| 2006 | Dominica           | 0 (0-0)                   |                                | 3 (2-4)                           |                                        | 0 (0-0)                    |                                 | 0 (0-0)                            |                                         | 0 (0-0)              |                           | 0 (0-0)                      |                                   |
| 2007 | Dominica           | 0 (0-0)                   |                                | 0 (0-1)                           |                                        | 0 (0-0)                    |                                 | 0 (0-0)                            |                                         | 0 (0-0)              |                           | 0 (0-0)                      |                                   |
| 2008 | Dominica           | 0 (0-0)                   |                                | 0 (0-0)                           |                                        | 0 (0-0)                    |                                 | 0 (0-0)                            |                                         | 0 (0-0)              |                           | 0 (0-0)                      |                                   |
| 2009 | Dominica           | 0 (0-0)                   |                                | 0 (0-0)                           |                                        | 0 (0-0)                    |                                 | 0 (0-0)                            |                                         | 0 (0-0)              |                           | 0 (0-0)                      |                                   |
| 2010 | Dominica           | 0 (0-0)                   |                                | 0 (0-0)                           |                                        | 0 (0-0)                    |                                 | 0 (0-0)                            |                                         | 0 (0-0)              |                           | 0 (0-0)                      |                                   |
| 2011 | Dominica           | 0 (0-0)                   |                                | 0 (0-0)                           |                                        | 0 (0-0)                    |                                 | 0 (0-0)                            |                                         | 0 (0-0)              |                           | 0 (0-0)                      |                                   |
| 2012 | Dominica           | 0 (0-0)                   |                                | 0 (0-0)                           |                                        | 0 (0-0)                    |                                 | 0 (0-0)                            |                                         | 0 (0-0)              |                           | 0 (0-0)                      |                                   |
| 2013 | Dominica           | 0 (0-0)                   |                                | 0 (0-0)                           |                                        | 0 (0-0)                    |                                 | 0 (0-0)                            |                                         | 0 (0-0)              |                           | 0 (0-0)                      |                                   |
| 2014 | Dominica           | 0 (0-0)                   |                                | 0 (0-0)                           |                                        | 0 (0-0)                    |                                 | 0 (0-0)                            |                                         | 0 (0-0)              |                           | 0 (0-0)                      |                                   |
| 2015 | Dominica           | 0 (0-0)                   | 0 (0-0)                        | 0 (0-0)                           | 0 (0-0)                                | 0 (0-0)                    | 0 (0-0)                         | 0 (0-0)                            | 0 (0-0)                                 | 0 (0-0)              | 0 (0-0)                   | 0 (0-0)                      | 0 (0-0)                           |
| 2000 | Dominican Republic | 136 (96-178)              |                                | 14 (10-18)                        |                                        | 36 (12-59)                 |                                 | 4 (1-8)                            |                                         | 0 (0-0)              |                           | 0 (0-0)                      |                                   |
| 2001 | Dominican Republic | 112 (79-148)              |                                | 11 (8-15)                         |                                        | 30 (10-49)                 |                                 | 3 (1-5)                            |                                         | 0 (0-0)              |                           | 0 (0-0)                      |                                   |
| 2002 | Dominican Republic | 19 (14-25)                |                                | 2 (1-3)                           |                                        | 5 (2-8)                    |                                 | 1 (0-1)                            |                                         | 0 (0-0)              |                           | 0 (0-0)                      |                                   |
| 2003 | Dominican Republic | 12 (9-16)                 |                                | 1 (1-2)                           |                                        | 3 (1-5)                    |                                 | 0 (0-1)                            |                                         | 0 (0-0)              |                           | 0 (0-0)                      |                                   |
| 2004 | Dominican Republic | 11 (8-14)                 |                                | 1 (1-1)                           |                                        | 3 (1-5)                    |                                 | 0 (0-0)                            |                                         | 0 (0-0)              |                           | 0 (0-0)                      |                                   |
| 2005 | Dominican Republic | 9 (6-12)                  |                                | 1 (1-1)                           |                                        | 2 (1-4)                    |                                 | 0 (0-0)                            |                                         | 0 (0-0)              |                           | 0 (0-0)                      |                                   |
| 2006 | Dominican Republic | 1 (1-1)                   |                                | 0 (0-0)                           |                                        | 0 (0-0)                    |                                 | 0 (0-0)                            |                                         | 0 (0-0)              |                           | 0 (0-0)                      |                                   |
| 2007 | Dominican Republic | 1 (1-1)                   |                                | 0 (0-0)                           |                                        | 0 (0-0)                    |                                 | 0 (0-0)                            |                                         | 0 (0-0)              |                           | 0 (0-0)                      |                                   |
| 2008 | Dominican Republic | 1 (1-1)                   |                                | 0 (0-0)                           |                                        | 0 (0-0)                    |                                 | 0 (0-0)                            |                                         | 0 (0-0)              |                           | 0 (0-0)                      |                                   |
| 2009 | Dominican Republic | 1 (1-1)                   |                                | 0 (0-0)                           |                                        | 0 (0-0)                    |                                 | 0 (0-0)                            |                                         | 0 (0-0)              |                           | 0 (0-0)                      |                                   |
| 2010 | Dominican Republic | 1 (1-1)                   |                                | 0 (0-0)                           |                                        | 0 (0-0)                    |                                 | 0 (0-0)                            |                                         | 0 (0-0)              |                           | 0 (0-0)                      |                                   |
| 2011 | Dominican Republic | 1 (1-1)                   |                                | 0 (0-0)                           |                                        | 0 (0-0)                    |                                 | 0 (0-0)                            |                                         | 0 (0-0)              |                           | 0 (0-0)                      |                                   |
| 2012 | Dominican Republic | 1 (1-1)                   |                                | 0 (0-0)                           |                                        | 0 (0-0)                    |                                 | 0 (0-0)                            |                                         | 0 (0-0)              |                           | 0 (0-0)                      |                                   |
| 2013 | Dominican Republic | 1 (1-1)                   |                                | 0 (0-0)                           |                                        | 0 (0-0)                    |                                 | 0 (0-0)                            |                                         | 0 (0-0)              |                           | 0 (0-0)                      |                                   |
| 2014 | Dominican Republic | 1 (1-1)                   |                                | 0 (0-0)                           |                                        | 0 (0-0)                    |                                 | 0 (0-0)                            |                                         | 0 (0-0)              |                           | 0 (0-0)                      |                                   |
| 2015 | Dominican Republic | 1 (1-1)                   | 0 (0-0)                        | 0 (0-0)                           | 0 (0-0)                                | 0 (0-0)                    | 0 (0-0)                         | 0 (0-0)                            | 0 (0-0)                                 | 0 (0-0)              | 0 (0-0)                   | 0 (0-0)                      | 0 (0-0)                           |
| 2000 | Ecuador            | 229 (161-301)             |                                | 15 (11-20)                        |                                        | 58 (29-92)                 |                                 | 4 (2-6)                            |                                         | 0 (0-1)              |                           | 0 (0-0)                      |                                   |
| 2001 | Ecuador            | 218 (153-286)             |                                | 15 (10-19)                        |                                        | 55 (28-87)                 |                                 | 4 (2-6)                            |                                         | 0 (0-1)              |                           | 0 (0-0)                      |                                   |
| 2002 | Ecuador            | 207 (145-272)             |                                | 14 (10-18)                        |                                        | 52 (26-83)                 |                                 | 3 (2-6)                            |                                         | 0 (0-1)              |                           | 0 (0-0)                      |                                   |
| 2003 | Ecuador            | 99 (70-130)               |                                | 7 (5-9)                           |                                        | 37 (19-59)                 |                                 | 2 (1-4)                            |                                         | 0 (0-0)              |                           | 0 (0-0)                      |                                   |
| 2004 | Ecuador            | 19 (13-25)                |                                | 1 (1-2)                           |                                        | 8 (4-13)                   |                                 | 1 (0-1)                            |                                         | 0 (0-0)              |                           | 0 (0-0)                      |                                   |
| 2005 | Ecuador            | 17 (12-22)                |                                | 1 (1-1)                           |                                        | 6 (2-9)                    |                                 | 0 (0-1)                            |                                         | 0 (0-0)              |                           | 0 (0-0)                      |                                   |
| 2006 | Ecuador            | 15 (11-20)                |                                | 1 (1-1)                           |                                        | 5 (2-8)                    |                                 | 0 (0-1)                            |                                         | 0 (0-0)              |                           | 0 (0-0)                      |                                   |
| 2007 | Ecuador            | 15 (10-19)                |                                | 1 (1-1)                           |                                        | 4 (2-7)                    |                                 | 0 (0-0)                            |                                         | 0 (0-0)              |                           | 0 (0-0)                      |                                   |
| 2008 | Ecuador            | 2 (1-3)                   |                                | 0 (0-0)                           |                                        | 1 (0-1)                    |                                 | 0 (0-0)                            |                                         | 0 (0-0)              |                           | 0 (0-0)                      |                                   |
| 2009 | Ecuador            | 2 (1-3)                   |                                | 0 (0-0)                           |                                        | 1 (0-1)                    |                                 | 0 (0-0)                            |                                         | 0 (0-0)              |                           | 0 (0-0)                      |                                   |
| 2010 | Ecuador            | 2 (1-3)                   |                                | 0 (0-0)                           |                                        | 1 (0-1)                    |                                 | 0 (0-0)                            |                                         | 0 (0-0)              |                           | 0 (0-0)                      |                                   |
| 2011 | Ecuador            | 2 (1-3)                   |                                | 0 (0-0)                           |                                        | 1 (0-1)                    |                                 | 0 (0-0)                            |                                         | 0 (0-0)              |                           | 0 (0-0)                      |                                   |
| 2012 | Ecuador            | 2 (2-3)                   |                                | 0 (0-0)                           |                                        | 1 (0-1)                    |                                 | 0 (0-0)                            |                                         | 0 (0-0)              |                           | 0 (0-0)                      |                                   |
| 2013 | Ecuador            | 2 (1-3)                   |                                | 0 (0-0)                           |                                        | 1 (0-1)                    |                                 | 0 (0-0)                            |                                         | 0 (0-0)              |                           | 0 (0-0)                      |                                   |
| 2014 | Ecuador            | 2 (1-3)                   |                                | 0 (0-0)                           |                                        | 1 (0-1)                    |                                 | 0 (0-0)                            |                                         | 0 (0-0)              |                           | 0 (0-0)                      |                                   |
| 2015 | Ecuador            | 2 (1-3)                   | 0 (0-0)                        | 0 (0-0)                           | 0 (0-0)                                | 1 (0-1)                    | 0 (0-0)                         | 0 (0-0)                            | 0 (0-0)                                 | 0 (0-0)              | 0 (0-0)                   | 0 (0-0)                      | 0 (0-0)                           |
| 2000 | Egypt              | 2090 (1470-2746)          |                                | 27 (19-35)                        |                                        | 225 (83-360)               |                                 | 3 (1-5)                            |                                         | 2 (1-3)              |                           | 0 (0-0)                      |                                   |
| 2001 | Egypt              | 1938 (1363-2547)          |                                | 24 (17-32)                        |                                        | 209 (78-333)               |                                 | 3 (1-4)                            |                                         | 2 (1-3)              |                           | 0 (0-0)                      |                                   |
| 2002 | Egypt              | 1794 (1262-2357)          |                                | 22 (16-29)                        |                                        | 194 (74-307)               |                                 | 2 (1-4)                            |                                         | 2 (1-2)              |                           | 0 (0-0)                      |                                   |
| 2003 | Egypt              | 1661 (1168-2182)          |                                | 20 (14-26)                        |                                        | 180 (69-283)               |                                 | 2 (1-3)                            |                                         | 1 (1-2)              |                           | 0 (0-0)                      |                                   |
| 2004 | Egypt              | 1554 (1093-2042)          |                                | 18 (13-24)                        |                                        | 169 (62-269)               |                                 | 2 (1-3)                            |                                         | 1 (0-2)              |                           | 0 (0-0)                      |                                   |
| 2005 | Egypt              | 1436 (1010-1886)          |                                | 17 (12-22)                        |                                        | 156 (56-253)               |                                 | 2 (1-3)                            |                                         | 1 (0-2)              |                           | 0 (0-0)                      |                                   |
| 2006 | Egypt              | 1341 (943-1782)           |                                | 15 (11-20)                        |                                        | 147 (54-234)               |                                 | 2 (1-3)                            |                                         | 1 (0-2)              |                           | 0 (0-0)                      |                                   |
| 2007 | Egypt              | 1265 (890-1662)           |                                | 14 (10-19)                        |                                        | 139 (53-220)               |                                 | 2 (1-2)                            |                                         | 1 (0-2)              |                           | 0 (0-0)                      |                                   |
| 2008 | Egypt              | 1185 (834-1557)           |                                | 13 (9-17)                         |                                        | 130 (52-204)               |                                 | 1 (1-2)                            |                                         | 1 (0-2)              |                           | 0 (0-0)                      |                                   |
| 2009 | Egypt              | 1131 (796-1486)           |                                | 12 (8-16)                         |                                        | 124 (49-196)               |                                 | 1 (1-2)                            |                                         | 1 (0-2)              |                           | 0 (0-0)                      |                                   |
| 2010 | Egypt              | 1113 (783-1463)           |                                | 12 (8-15)                         |                                        | 121 (20-206)               |                                 | 1 (0-2)                            |                                         | 1 (0-2)              |                           | 0 (0-0)                      |                                   |
| 2011 | Egypt              | 1114 (784-1464)           |                                | 11 (8-15)                         |                                        | 120 (19-205)               |                                 | 1 (0-2)                            |                                         | 1 (0-2)              |                           | 0 (0-0)                      |                                   |
| 2012 | Egypt              | 1143 (804-1501)           |                                | 11 (8-15)                         |                                        | 121 (19-209)               |                                 | 1 (0-2)                            |                                         | 1 (0-2)              |                           | 0 (0-0)                      |                                   |
| 2013 | Egypt              | 1170 (823-1538)           |                                | 11 (8-14)                         |                                        | 122 (19-212)               |                                 | 1 (0-2)                            |                                         | 1 (0-2)              |                           | 0 (0-0)                      |                                   |
| 2014 | Egypt              | 221 (155-290)             |                                | 2 (1-3)                           |                                        | 29 (4-50)                  |                                 | 0 (0-0)                            |                                         | 0 (0-0)              |                           | 0 (0-0)                      |                                   |
| 2015 | Egypt              | 109 (77-143)              | 0 (0-0)                        | 1 (1-1)                           | 0 (0-0)                                | 14 (2-25)                  | 0 (0-0)                         | 0 (0-0)                            | 0 (0-0)                                 | 0 (0-0)              | 0 (0-0)                   | 0 (0-0)                      | 0 (0-0)                           |
| 2000 | El Salvador        | 132 (93-173)              |                                | 19 (13-25)                        |                                        | 28 (9-47)                  |                                 | 4 (1-7)                            |                                         | 0 (0-0)              |                           | 0 (0-0)                      |                                   |
| 2001 | El Salvador        | 115 (81-152)              |                                | 17 (12-22)                        |                                        | 25 (8-41)                  |                                 | 4 (1-6)                            |                                         | 0 (0-0)              |                           | 0 (0-0)                      |                                   |
| 2002 | El Salvador        | 19 (13-25)                |                                | 3 (2-4)                           |                                        | 7 (1-12)                   |                                 | 1 (0-2)                            |                                         | 0 (0-0)              |                           | 0 (0-0)                      |                                   |
| 2003 | El Salvador        | 8 (5-10)                  |                                | 1 (1-2)                           |                                        | 3 (0-5)                    |                                 | 0 (0-1)                            |                                         | 0 (0-0)              |                           | 0 (0-0)                      |                                   |
| 2004 | El Salvador        | 8 (5-10)                  |                                | 1 (1-2)                           |                                        | 3 (0-5)                    |                                 | 0 (0-1)                            |                                         | 0 (0-0)              |                           | 0 (0-0)                      |                                   |
| 2005 | El Salvador        | 7 (5-9)                   |                                | 1 (1-2)                           |                                        | 3 (0-5)                    |                                 | 0 (0-1)                            |                                         | 0 (0-0)              |                           | 0 (0-0)                      |                                   |
| 2006 | El Salvador        | 6 (4-7)                   |                                | 1 (1-1)                           |                                        | 2 (0-4)                    |                                 | 0 (0-1)                            |                                         | 0 (0-0)              |                           | 0 (0-0)                      |                                   |
| 2007 | El Salvador        | 1 (1-1)                   |                                | 0 (0-0)                           |                                        | 0 (0-1)                    |                                 | 0 (0-0)                            |                                         | 0 (0-0)              |                           | 0 (0-0)                      |                                   |
| 2008 | El Salvador        | 1 (0-1)                   |                                | 0 (0-0)                           |                                        | 0 (0-0)                    |                                 | 0 (0-0)                            |                                         | 0 (0-0)              |                           | 0 (0-0)                      |                                   |
| 2009 | El Salvador        | 1 (0-1)                   |                                | 0 (0-0)                           |                                        | 0 (0-0)                    |                                 | 0 (0-0)                            |                                         | 0 (0-0)              |                           | 0 (0-0)                      |                                   |
| 2010 | El Salvador        | 1 (0-1)                   |                                | 0 (0-0)                           |                                        | 0 (0-0)                    |                                 | 0 (0-0)                            |                                         | 0 (0-0)              |                           | 0 (0-0)                      |                                   |
| 2011 | El Salvador        | 1 (0-1)                   |                                | 0 (0-0)                           |                                        | 0 (0-0)                    |                                 | 0 (0-0)                            |                                         | 0 (0-0)              |                           | 0 (0-0)                      |                                   |
| 2012 | El Salvador        | 1 (0-1)                   |                                | 0 (0-0)                           |                                        | 0 (0-0)                    |                                 | 0 (0-0)                            |                                         | 0 (0-0)              |                           | 0 (0-0)                      |                                   |
| 2013 | El Salvador        | 1 (0-1)                   |                                | 0 (0-0)                           |                                        | 0 (0-0)                    |                                 | 0 (0-0)                            |                                         | 0 (0-0)              |                           | 0 (0-0)                      |                                   |
| 2014 | El Salvador        | 1 (0-1)                   |                                | 0 (0-0)                           |                                        | 0 (0-0)                    |                                 | 0 (0-0)                            |                                         | 0 (0-0)              |                           | 0 (0-0)                      |                                   |

Hib = *Haemophilus influenzae* type b; npnm = non-pneumonia, non-meningitis; HIV = deaths only in HIV-infected children; Uncertainty range provided in parentheses.

| Year | Country           | Hib pneumonia deaths<br>(UR) | Hib pneumonia deaths,<br>HIV (UR) | Hib pneumonia<br>mortality rate (UR) | Hib pneumonia<br>mortality rate, HIV (UR) | Hib meningitis deaths<br>(UR) | Hib meningitis deaths,<br>HIV (UR) | Hib meningitis mortality<br>rate (UR) | Hib meningitis mortality<br>rate, HIV (UR) | Hib NPNM deaths (UR) | Hib NPNM deaths, HIV<br>(UR) | Hib NPNM mortality rate<br>(UR) | Hib NPNM mortality<br>rate, HIV (UR) |
|------|-------------------|------------------------------|-----------------------------------|--------------------------------------|-------------------------------------------|-------------------------------|------------------------------------|---------------------------------------|--------------------------------------------|----------------------|------------------------------|---------------------------------|--------------------------------------|
| 2015 | El Salvador       | 1 (0-1)                      | 0 (0-0)                           | 0 (0-0)                              | 0 (0-0)                                   | 0 (0-0)                       | 0 (0-0)                            | 0 (0-0)                               | 0 (0-0)                                    | 0 (0-0)              | 0 (0-0)                      | 0 (0-0)                         | 0 (0-0)                              |
| 2000 | Equatorial Guinea | 69 (49-91)                   |                                   | 80 (66-105)                          |                                           | 15 (7-22)                     |                                    | 17 (8-25)                             |                                            | 0 (0-0)              |                              | 0 (0-0)                         | 0 (0-0)                              |
| 2001 | Equatorial Guinea | 66 (47-87)                   |                                   | 75 (53-98)                           |                                           | 13 (5-22)                     |                                    | 15 (5-24)                             |                                            | 0 (0-0)              |                              | 0 (0-0)                         | 0 (0-0)                              |
| 2002 | Equatorial Guinea | 62 (44-82)                   |                                   | 68 (48-90)                           |                                           | 12 (4-19)                     |                                    | 13 (5-21)                             |                                            | 0 (0-0)              |                              | 0 (0-0)                         | 0 (0-0)                              |
| 2003 | Equatorial Guinea | 57 (40-75)                   |                                   | 61 (43-81)                           |                                           | 11 (4-17)                     |                                    | 12 (4-19)                             |                                            | 0 (0-0)              |                              | 0 (0-0)                         | 0 (0-0)                              |
| 2004 | Equatorial Guinea | 53 (37-70)                   |                                   | 56 (39-74)                           |                                           | 10 (3-15)                     |                                    | 10 (3-16)                             |                                            | 0 (0-0)              |                              | 0 (0-0)                         | 0 (0-0)                              |
| 2005 | Equatorial Guinea | 52 (37-68)                   |                                   | 54 (38-71)                           |                                           | 9 (3-15)                      |                                    | 9 (3-15)                              |                                            | 0 (0-0)              |                              | 0 (0-0)                         | 0 (0-0)                              |
| 2006 | Equatorial Guinea | 55 (39-72)                   |                                   | 55 (39-73)                           |                                           | 9 (3-15)                      |                                    | 9 (3-15)                              |                                            | 0 (0-0)              |                              | 0 (0-0)                         | 0 (0-0)                              |
| 2007 | Equatorial Guinea | 60 (42-79)                   |                                   | 58 (41-77)                           |                                           | 10 (3-16)                     |                                    | 10 (3-15)                             |                                            | 0 (0-0)              |                              | 0 (0-0)                         | 0 (0-0)                              |
| 2008 | Equatorial Guinea | 64 (45-83)                   |                                   | 60 (42-79)                           |                                           | 10 (4-16)                     |                                    | 10 (3-16)                             |                                            | 0 (0-0)              |                              | 0 (0-0)                         | 0 (0-0)                              |
| 2009 | Equatorial Guinea | 65 (46-86)                   |                                   | 60 (42-79)                           |                                           | 11 (4-17)                     |                                    | 10 (3-16)                             |                                            | 0 (0-0)              |                              | 0 (0-0)                         | 0 (0-0)                              |
| 2010 | Equatorial Guinea | 66 (46-86)                   |                                   | 59 (41-77)                           |                                           | 11 (4-17)                     |                                    | 10 (3-15)                             |                                            | 0 (0-0)              |                              | 0 (0-0)                         | 0 (0-0)                              |
| 2011 | Equatorial Guinea | 64 (45-84)                   |                                   | 56 (39-73)                           |                                           | 11 (4-17)                     |                                    | 9 (3-15)                              |                                            | 0 (0-0)              |                              | 0 (0-0)                         | 0 (0-0)                              |
| 2012 | Equatorial Guinea | 61 (43-80)                   |                                   | 52 (36-68)                           |                                           | 10 (4-17)                     |                                    | 9 (3-14)                              |                                            | 0 (0-0)              |                              | 0 (0-0)                         | 0 (0-0)                              |
| 2013 | Equatorial Guinea | 62 (44-81)                   |                                   | 51 (36-67)                           |                                           | 11 (4-17)                     |                                    | 9 (3-14)                              |                                            | 0 (0-0)              |                              | 0 (0-0)                         | 0 (0-0)                              |
| 2014 | Equatorial Guinea | 56 (39-74)                   |                                   | 45 (32-60)                           |                                           | 10 (4-15)                     |                                    | 8 (3-12)                              |                                            | 0 (0-0)              |                              | 0 (0-0)                         | 0 (0-0)                              |
| 2015 | Equatorial Guinea | 46 (32-60)                   | 3 (2-4)                           | 36 (26-48)                           | 3 (2-3)                                   | 8 (3-13)                      | 1 (0-1)                            | 6 (2-10)                              | 0 (0-1)                                    | 0 (0-0)              | 0 (0-0)                      | 0 (0-0)                         | 0 (0-0)                              |
| 2000 | Eritrea           | 321 (226-422)                |                                   | 58 (41-77)                           |                                           | 131 (43-212)                  |                                    | 24 (8-38)                             |                                            | 1 (0-1)              |                              | 1 (0-1)                         | 0 (0-0)                              |
| 2001 | Eritrea           | 320 (225-421)                |                                   | 57 (40-74)                           |                                           | 132 (43-213)                  |                                    | 23 (8-38)                             |                                            | 1 (0-1)              |                              | 1 (0-1)                         | 0 (0-0)                              |
| 2002 | Eritrea           | 320 (225-421)                |                                   | 54 (38-72)                           |                                           | 133 (44-215)                  |                                    | 23 (7-37)                             |                                            | 1 (0-1)              |                              | 1 (0-1)                         | 0 (0-0)                              |
| 2003 | Eritrea           | 321 (226-422)                |                                   | 52 (37-69)                           |                                           | 136 (45-219)                  |                                    | 22 (7-36)                             |                                            | 1 (0-1)              |                              | 1 (0-1)                         | 0 (0-0)                              |
| 2004 | Eritrea           | 322 (226-423)                |                                   | 50 (35-66)                           |                                           | 138 (41-230)                  |                                    | 22 (6-36)                             |                                            | 1 (0-2)              |                              | 1 (0-2)                         | 0 (0-0)                              |
| 2005 | Eritrea           | 320 (225-420)                |                                   | 48 (34-63)                           |                                           | 139 (41-231)                  |                                    | 21 (6-35)                             |                                            | 1 (0-2)              |                              | 1 (0-2)                         | 0 (0-0)                              |
| 2006 | Eritrea           | 317 (223-417)                |                                   | 45 (32-60)                           |                                           | 139 (41-233)                  |                                    | 20 (6-33)                             |                                            | 1 (0-2)              |                              | 1 (0-2)                         | 0 (0-0)                              |
| 2007 | Eritrea           | 312 (220-410)                |                                   | 43 (30-57)                           |                                           | 139 (41-232)                  |                                    | 19 (6-32)                             |                                            | 1 (0-2)              |                              | 1 (0-2)                         | 0 (0-0)                              |
| 2008 | Eritrea           | 46 (32-60)                   |                                   | 6 (4-8)                              |                                           | 21 (6-34)                     |                                    | 3 (1-5)                               |                                            | 0 (0-0)              |                              | 0 (0-0)                         | 0 (0-0)                              |
| 2009 | Eritrea           | 18 (12-23)                   |                                   | 2 (2-3)                              |                                           | 8 (2-13)                      |                                    | 1 (0-2)                               |                                            | 0 (0-0)              |                              | 0 (0-0)                         | 0 (0-0)                              |
| 2010 | Eritrea           | 17 (12-22)                   |                                   | 2 (2-3)                              |                                           | 8 (2-13)                      |                                    | 1 (0-2)                               |                                            | 0 (0-0)              |                              | 0 (0-0)                         | 0 (0-0)                              |
| 2011 | Eritrea           | 16 (12-22)                   |                                   | 2 (1-3)                              |                                           | 8 (2-12)                      |                                    | 1 (0-2)                               |                                            | 0 (0-0)              |                              | 0 (0-0)                         | 0 (0-0)                              |
| 2012 | Eritrea           | 20 (14-26)                   |                                   | 3 (2-3)                              |                                           | 9 (3-15)                      |                                    | 1 (0-2)                               |                                            | 0 (0-0)              |                              | 0 (0-0)                         | 0 (0-0)                              |
| 2013 | Eritrea           | 3 (2-3)                      |                                   | 0 (0-0)                              |                                           | 1 (0-2)                       |                                    | 0 (0-0)                               |                                            | 0 (0-0)              |                              | 0 (0-0)                         | 0 (0-0)                              |
| 2014 | Eritrea           | 2 (2-3)                      |                                   | 0 (0-0)                              |                                           | 1 (0-2)                       |                                    | 0 (0-0)                               |                                            | 0 (0-0)              |                              | 0 (0-0)                         | 0 (0-0)                              |
| 2015 | Eritrea           | 2 (2-3)                      | 0 (0-0)                           | 0 (0-0)                              | 0 (0-0)                                   | 1 (0-2)                       | 0 (0-0)                            | 0 (0-0)                               | 0 (0-0)                                    | 0 (0-0)              | 0 (0-0)                      | 0 (0-0)                         | 0 (0-0)                              |
| 2000 | Estonia           | 1 (1-1)                      |                                   | 1 (1-2)                              |                                           | 0 (0-0)                       |                                    | 0 (0-1)                               |                                            | 0 (0-0)              |                              | 0 (0-0)                         | 0 (0-0)                              |
| 2001 | Estonia           | 0 (0-0)                      |                                   | 1 (0-1)                              |                                           | 0 (0-1)                       |                                    | 1 (0-1)                               |                                            | 0 (0-0)              |                              | 0 (0-0)                         | 0 (0-0)                              |
| 2002 | Estonia           | 1 (1-1)                      |                                   | 2 (1-2)                              |                                           | 0 (0-1)                       |                                    | 1 (0-1)                               |                                            | 0 (0-0)              |                              | 0 (0-0)                         | 0 (0-0)                              |
| 2003 | Estonia           | 1 (0-1)                      |                                   | 1 (1-1)                              |                                           | 0 (0-0)                       |                                    | 0 (0-1)                               |                                            | 0 (0-0)              |                              | 0 (0-0)                         | 0 (0-0)                              |
| 2004 | Estonia           | 1 (0-1)                      |                                   | 1 (1-1)                              |                                           | 0 (0-0)                       |                                    | 0 (0-1)                               |                                            | 0 (0-0)              |                              | 0 (0-0)                         | 0 (0-0)                              |
| 2005 | Estonia           | 0 (0-0)                      |                                   | 0 (0-0)                              |                                           | 0 (0-0)                       |                                    | 0 (0-0)                               |                                            | 0 (0-0)              |                              | 0 (0-0)                         | 0 (0-0)                              |
| 2006 | Estonia           | 0 (0-0)                      |                                   | 0 (0-0)                              |                                           | 0 (0-0)                       |                                    | 0 (0-0)                               |                                            | 0 (0-0)              |                              | 0 (0-0)                         | 0 (0-0)                              |
| 2007 | Estonia           | 0 (0-0)                      |                                   | 0 (0-0)                              |                                           | 0 (0-0)                       |                                    | 0 (0-0)                               |                                            | 0 (0-0)              |                              | 0 (0-0)                         | 0 (0-0)                              |
| 2008 | Estonia           | 0 (0-0)                      |                                   | 0 (0-0)                              |                                           | 0 (0-0)                       |                                    | 0 (0-0)                               |                                            | 0 (0-0)              |                              | 0 (0-0)                         | 0 (0-0)                              |
| 2009 | Estonia           | 0 (0-0)                      |                                   | 0 (0-0)                              |                                           | 0 (0-0)                       |                                    | 0 (0-0)                               |                                            | 0 (0-0)              |                              | 0 (0-0)                         | 0 (0-0)                              |
| 2010 | Estonia           | 0 (0-0)                      |                                   | 0 (0-0)                              |                                           | 0 (0-0)                       |                                    | 0 (0-0)                               |                                            | 0 (0-0)              |                              | 0 (0-0)                         | 0 (0-0)                              |
| 2011 | Estonia           | 0 (0-0)                      |                                   | 0 (0-0)                              |                                           | 0 (0-0)                       |                                    | 0 (0-0)                               |                                            | 0 (0-0)              |                              | 0 (0-0)                         | 0 (0-0)                              |
| 2012 | Estonia           | 0 (0-0)                      |                                   | 0 (0-0)                              |                                           | 0 (0-0)                       |                                    | 0 (0-0)                               |                                            | 0 (0-0)              |                              | 0 (0-0)                         | 0 (0-0)                              |
| 2013 | Estonia           | 0 (0-0)                      |                                   | 0 (0-0)                              |                                           | 0 (0-0)                       |                                    | 0 (0-0)                               |                                            | 0 (0-0)              |                              | 0 (0-0)                         | 0 (0-0)                              |
| 2014 | Estonia           | 0 (0-0)                      |                                   | 0 (0-0)                              |                                           | 0 (0-0)                       |                                    | 0 (0-0)                               |                                            | 0 (0-0)              |                              | 0 (0-0)                         | 0 (0-0)                              |
| 2015 | Estonia           | 0 (0-0)                      | 0 (0-0)                           | 0 (0-0)                              | 0 (0-0)                                   | 0 (0-0)                       | 0 (0-0)                            | 0 (0-0)                               | 0 (0-0)                                    | 0 (0-0)              | 0 (0-0)                      | 0 (0-0)                         | 0 (0-0)                              |
| 2000 | Ethiopia          | 11047 (7770-14515)           |                                   | 91 (64-119)                          |                                           | 5734 (1541-9572)              |                                    | 47 (13-78)                            |                                            | 23 (6-39)            |                              | 23 (6-39)                       | 0 (0-0)                              |
| 2001 | Ethiopia          | 10756 (7565-14132)           |                                   | 80 (66-105)                          |                                           | 5557 (1499-9272)              |                                    | 44 (12-74)                            |                                            | 23 (6-38)            |                              | 23 (6-38)                       | 0 (0-0)                              |
| 2002 | Ethiopia          | 10261 (7216-13482)           |                                   | 80 (66-105)                          |                                           | 5271 (1427-8788)              |                                    | 41 (11-69)                            |                                            | 21 (6-36)            |                              | 21 (6-36)                       | 0 (0-0)                              |
| 2003 | Ethiopia          | 8974 (6782-12670)            |                                   | 74 (52-98)                           |                                           | 4914 (1336-8187)              |                                    | 38 (10-63)                            |                                            | 20 (5-33)            |                              | 20 (5-33)                       | 0 (0-0)                              |
| 2004 | Ethiopia          | 8672 (6310-11788)            |                                   | 68 (48-90)                           |                                           | 4509 (1231-7508)              |                                    | 34 (9-57)                             |                                            | 18 (5-31)            |                              | 18 (5-31)                       | 0 (0-0)                              |
| 2005 | Ethiopia          | 8294 (5833-10897)            |                                   | 63 (44-82)                           |                                           | 4095 (1123-6816)              |                                    | 31 (8-51)                             |                                            | 17 (5-28)            |                              | 17 (5-28)                       | 0 (0-0)                              |
| 2006 | Ethiopia          | 7984 (5601-10464)            |                                   | 60 (42-79)                           |                                           | 3855 (1066-6407)              |                                    | 29 (8-48)                             |                                            | 16 (4-26)            |                              | 16 (4-26)                       | 0 (0-0)                              |
| 2007 | Ethiopia          | 4117 (2896-5410)             |                                   | 31 (22-40)                           |                                           | 1952 (645-3239)               |                                    | 15 (4-24)                             |                                            | 8 (2-13)             |                              | 8 (2-13)                        | 0 (0-0)                              |
| 2008 | Ethiopia          | 937 (650-1231)               |                                   | 7 (5-9)                              |                                           | 435 (123-722)                 |                                    | 3 (1-5)                               |                                            | 2 (0-3)              |                              | 2 (0-3)                         | 0 (0-0)                              |
| 2009 | Ethiopia          | 856 (602-1125)               |                                   | 6 (4-8)                              |                                           | 390 (111-646)                 |                                    | 3 (1-5)                               |                                            | 2 (0-3)              |                              | 2 (0-3)                         | 0 (0-0)                              |
| 2010 | Ethiopia          | 742 (522-975)                |                                   | 5 (4-7)                              |                                           | 332 (95-548)                  |                                    | 2 (1-4)                               |                                            | 1 (0-2)              |                              | 1 (0-2)                         | 0 (0-0)                              |
| 2011 | Ethiopia          | 666 (468-875)                |                                   | 5 (3-6)                              |                                           | 292 (75-498)                  |                                    | 2 (1-4)                               |                                            | 1 (0-2)              |                              | 1 (0-2)                         | 0 (0-0)                              |
| 2012 | Ethiopia          | 51 (36-67)                   |                                   | 0 (0-0)                              |                                           | 22 (6-37)                     |                                    | 0 (0-0)                               |                                            | 0 (0-0)              |                              | 0 (0-0)                         | 0 (0-0)                              |
| 2013 | Ethiopia          | 49 (34-64)                   |                                   | 0 (0-0)                              |                                           | 21 (5-35)                     |                                    | 0 (0-0)                               |                                            | 0 (0-0)              |                              | 0 (0-0)                         | 0 (0-0)                              |
| 2014 | Ethiopia          | 48 (34-63)                   |                                   | 0 (0-0)                              |                                           | 20 (5-34)                     |                                    | 0 (0-0)                               |                                            | 0 (0-0)              |                              | 0 (0-0)                         | 0 (0-0)                              |
| 2015 | Ethiopia          | 46 (32-60)                   | 0 (0-0)                           | 0 (0-0)                              | 0 (0-0)                                   | 19 (5-32)                     | 0 (0-0)                            | 0 (0-0)                               | 0 (0-0)                                    | 0 (0-0)              | 0 (0-0)                      | 0 (0-0)                         | 0 (0-0)                              |
| 2000 | Fiji              | 1 (0-1)                      |                                   | 1 (0-1)                              |                                           | 0 (0-1)                       |                                    | 0 (0-1)                               |                                            | 0 (0-0)              |                              | 0 (0-0)                         | 0 (0-0)                              |
| 2001 | Fiji              | 1 (0-1)                      |                                   | 1 (0-1)                              |                                           | 0 (0-1)                       |                                    | 0 (0-1)                               |                                            | 0 (0-0)              |                              | 0 (0-0)                         | 0 (0-0)                              |
| 2002 | Fiji              | 0 (0-0)                      |                                   | 0 (0-0)                              |                                           | 0 (0-0)                       |                                    | 0 (0-0)                               |                                            | 0 (0-0)              |                              | 0 (0-0)                         | 0 (0-0)                              |
| 2003 | Fiji              | 0 (0-0)                      |                                   | 0 (0-0)                              |                                           | 0 (0-0)                       |                                    | 0 (0-0)                               |                                            | 0 (0-0)              |                              | 0 (0-0)                         | 0 (0-0)                              |
| 2004 | Fiji              | 0 (0-0)                      |                                   | 0 (0-0)                              |                                           | 0 (0-0)                       |                                    | 0 (0-0)                               |                                            | 0 (0-0)              |                              | 0 (0-0)                         | 0 (0-0)                              |
| 2005 | Fiji              | 0 (0-0)                      |                                   | 0 (0-0)                              |                                           | 0 (0-0)                       |                                    | 0 (0-0)                               |                                            | 0 (0-0)              |                              | 0 (0-0)                         | 0 (0-0)                              |
| 2006 | Fiji              | 0 (0-0)                      |                                   | 0 (0-0)                              |                                           | 0 (0-0)                       |                                    | 0 (0-0)                               |                                            | 0 (0-0)              |                              | 0 (0-0)                         | 0 (0-0)                              |
| 2007 | Fiji              | 0 (0-0)                      |                                   | 0 (0-0)                              |                                           | 0 (0-0)                       |                                    | 0 (0-0)                               |                                            | 0 (0-0)              |                              | 0 (0-0)                         | 0 (0-0)                              |
| 2008 | Fiji              | 0 (0-0)                      |                                   | 0 (0-0)                              |                                           | 0 (0-0)                       |                                    | 0 (0-0)                               |                                            | 0 (0-0)              |                              | 0 (0-0)                         | 0 (0-0)                              |
| 2009 | Fiji              | 0 (0-0)                      |                                   | 0 (0-0)                              |                                           | 0 (0-0)                       |                                    | 0 (0-0)                               |                                            | 0 (0-0)              |                              | 0 (0-0)                         | 0 (0-0)                              |
| 2010 | Fiji              | 0 (0-0)                      |                                   | 0 (0-0)                              |                                           | 0 (0-0)                       |                                    | 0 (0-0)                               |                                            | 0 (0-0)              |                              | 0 (0-0)                         | 0 (0-0)                              |
| 2011 | Fiji              | 0 (0-0)                      |                                   | 0 (0-0)                              |                                           | 0 (0-0)                       |                                    | 0 (0-0)                               |                                            | 0 (0-0)              |                              | 0 (0-0)                         | 0 (0-0)                              |
| 2012 | Fiji              | 0 (0-0)                      |                                   | 0 (0-0)                              |                                           | 0 (0-0)                       |                                    | 0 (0-0)                               |                                            | 0 (0-0)              |                              | 0 (0-0)                         | 0 (0-0)                              |
| 2013 | Fiji              | 0 (0-0)                      |                                   | 0 (0-0)                              |                                           | 0 (0-0)                       |                                    | 0 (0-0)                               |                                            | 0 (0-0)              |                              | 0 (0-0)                         | 0 (0-0)                              |
| 2014 | Fiji              | 0 (0-0)                      |                                   | 0 (0-0)                              |                                           | 0 (0-0)                       |                                    | 0 (0-0)                               |                                            | 0 (0-0)              |                              | 0 (0-0)                         | 0 (0-0)                              |
| 2015 | Fiji              | 0 (0-0)                      | 0 (0-0)                           | 0 (0-0)                              | 0 (0-0)                                   | 0 (0-0)                       | 0 (0-0)                            | 0 (0-0)                               | 0 (0-0)                                    | 0 (0-0)              | 0 (0-0)                      | 0 (0-0)                         | 0 (0-0)                              |
| 2000 | Finland           | 0 (0-0)                      |                                   | 0 (0-0)                              |                                           | 0 (0-0)                       |                                    | 0 (0-0)                               |                                            | 0 (0-0)              |                              | 0 (0-0)                         | 0 (0-0)                              |
| 2001 | Finland           | 0 (0-0)                      |                                   | 0 (0-0)                              |                                           | 0 (0-0)                       |                                    | 0 (0-0)                               |                                            | 0 (0-0)              |                              | 0 (0-0)                         | 0 (0-0)                              |
| 2002 | Finland           | 0 (0-0)                      |                                   | 0 (0-0)                              |                                           | 0 (0-0)                       |                                    | 0 (0-0)                               |                                            | 0 (0-0)              |                              | 0 (0-0)                         | 0 (0-0)                              |
| 2003 | Finland           | 0 (0-0)                      |                                   | 0 (0-0)                              |                                           | 0 (0-0)                       |                                    | 0 (0-0)                               |                                            | 0 (0-0)              |                              | 0 (0-0)                         | 0 (0-0)                              |
| 2004 | Finland           | 0 (0-0)                      |                                   | 0 (0-0)                              |                                           | 0 (0-0)                       |                                    | 0 (0-0)                               |                                            | 0 (0-0)              |                              | 0 (0-0)                         | 0 (0-0)                              |
| 2005 | Finland           | 0 (0-0)                      |                                   | 0 (0-0)                              |                                           | 0 (0-0)                       |                                    | 0 (0-0)                               |                                            | 0 (0-0)              |                              | 0 (0-0)                         | 0 (0-0)                              |
| 2006 | Finland           | 0 (0-0)                      |                                   | 0 (0-0)                              |                                           | 0 (0-0)                       |                                    | 0 (0-0)                               |                                            | 0 (0-0)              |                              | 0 (0-0)                         | 0 (0-0)                              |

| Year | Country | Hib pneumonia deaths (UR) | Hib pneumonia deaths, HIV (UR) | Hib pneumonia mortality rate (UR) | Hib pneumonia mortality rate, HIV (UR) | Hib meningitis deaths (UR) | Hib meningitis deaths, HIV (UR) | Hib meningitis mortality rate (UR) | Hib meningitis mortality rate, HIV (UR) | Hib NPNM deaths (UR) | Hib NPNM deaths, HIV (UR) | Hib NPNM mortality rate (UR) | Hib NPNM mortality rate, HIV (UR) |
|------|---------|---------------------------|--------------------------------|-----------------------------------|----------------------------------------|----------------------------|---------------------------------|------------------------------------|-----------------------------------------|----------------------|---------------------------|------------------------------|-----------------------------------|
| 2007 | Finland | 0 (0-0)                   |                                | 0 (0-0)                           |                                        | 0 (0-0)                    |                                 | 0 (0-0)                            |                                         | 0 (0-0)              |                           | 0 (0-0)                      |                                   |
| 2008 | Finland | 0 (0-0)                   |                                | 0 (0-0)                           |                                        | 0 (0-0)                    |                                 | 0 (0-0)                            |                                         | 0 (0-0)              |                           | 0 (0-0)                      |                                   |
| 2009 | Finland | 0 (0-0)                   |                                | 0 (0-0)                           |                                        | 0 (0-0)                    |                                 | 0 (0-0)                            |                                         | 0 (0-0)              |                           | 0 (0-0)                      |                                   |
| 2010 | Finland | 0 (0-0)                   |                                | 0 (0-0)                           |                                        | 0 (0-0)                    |                                 | 0 (0-0)                            |                                         | 0 (0-0)              |                           | 0 (0-0)                      |                                   |
| 2011 | Finland | 0 (0-0)                   |                                | 0 (0-0)                           |                                        | 0 (0-0)                    |                                 | 0 (0-0)                            |                                         | 0 (0-0)              |                           | 0 (0-0)                      |                                   |
| 2012 | Finland | 0 (0-0)                   |                                | 0 (0-0)                           |                                        | 0 (0-0)                    |                                 | 0 (0-0)                            |                                         | 0 (0-0)              |                           | 0 (0-0)                      |                                   |
| 2013 | Finland | 0 (0-0)                   |                                | 0 (0-0)                           |                                        | 0 (0-0)                    |                                 | 0 (0-0)                            |                                         | 0 (0-0)              |                           | 0 (0-0)                      |                                   |
| 2014 | Finland | 0 (0-0)                   |                                | 0 (0-0)                           |                                        | 0 (0-0)                    |                                 | 0 (0-0)                            |                                         | 0 (0-0)              |                           | 0 (0-0)                      |                                   |
| 2015 | Finland | 0 (0-0)                   | 0 (0-0)                        | 0 (0-0)                           | 0 (0-0)                                | 0 (0-0)                    | 0 (0-0)                         | 0 (0-0)                            | 0 (0-0)                                 | 0 (0-0)              | 0 (0-0)                   | 0 (0-0)                      | 0 (0-0)                           |
| 2000 | France  | 1 (1-1)                   |                                | 0 (0-0)                           |                                        | 2 (1-4)                    |                                 | 0 (0-0)                            |                                         | 0 (0-0)              |                           | 0 (0-0)                      |                                   |
| 2001 | France  | 1 (1-1)                   |                                | 0 (0-0)                           |                                        | 2 (1-3)                    |                                 | 0 (0-0)                            |                                         | 0 (0-0)              |                           | 0 (0-0)                      |                                   |
| 2002 | France  | 1 (1-1)                   |                                | 0 (0-0)                           |                                        | 2 (1-3)                    |                                 | 0 (0-0)                            |                                         | 0 (0-0)              |                           | 0 (0-0)                      |                                   |
| 2003 | France  | 0 (0-0)                   |                                | 0 (0-0)                           |                                        | 0 (0-0)                    |                                 | 0 (0-0)                            |                                         | 0 (0-0)              |                           | 0 (0-0)                      |                                   |
| 2004 | France  | 0 (0-0)                   |                                | 0 (0-0)                           |                                        | 0 (0-0)                    |                                 | 0 (0-0)                            |                                         | 0 (0-0)              |                           | 0 (0-0)                      |                                   |
| 2005 | France  | 0 (0-0)                   |                                | 0 (0-0)                           |                                        | 0 (0-0)                    |                                 | 0 (0-0)                            |                                         | 0 (0-0)              |                           | 0 (0-0)                      |                                   |
| 2006 | France  | 0 (0-0)                   |                                | 0 (0-0)                           |                                        | 0 (0-0)                    |                                 | 0 (0-0)                            |                                         | 0 (0-0)              |                           | 0 (0-0)                      |                                   |
| 2007 | France  | 0 (0-0)                   |                                | 0 (0-0)                           |                                        | 0 (0-0)                    |                                 | 0 (0-0)                            |                                         | 0 (0-0)              |                           | 0 (0-0)                      |                                   |
| 2008 | France  | 0 (0-0)                   |                                | 0 (0-0)                           |                                        | 0 (0-0)                    |                                 | 0 (0-0)                            |                                         | 0 (0-0)              |                           | 0 (0-0)                      |                                   |
| 2009 | France  | 0 (0-0)                   |                                | 0 (0-0)                           |                                        | 0 (0-0)                    |                                 | 0 (0-0)                            |                                         | 0 (0-0)              |                           | 0 (0-0)                      |                                   |
| 2010 | France  | 0 (0-0)                   |                                | 0 (0-0)                           |                                        | 0 (0-0)                    |                                 | 0 (0-0)                            |                                         | 0 (0-0)              |                           | 0 (0-0)                      |                                   |
| 2011 | France  | 0 (0-0)                   |                                | 0 (0-0)                           |                                        | 0 (0-0)                    |                                 | 0 (0-0)                            |                                         | 0 (0-0)              |                           | 0 (0-0)                      |                                   |
| 2012 | France  | 0 (0-0)                   |                                | 0 (0-0)                           |                                        | 0 (0-0)                    |                                 | 0 (0-0)                            |                                         | 0 (0-0)              |                           | 0 (0-0)                      |                                   |
| 2013 | France  | 0 (0-0)                   |                                | 0 (0-0)                           |                                        | 0 (0-0)                    |                                 | 0 (0-0)                            |                                         | 0 (0-0)              |                           | 0 (0-0)                      |                                   |
| 2014 | France  | 0 (0-0)                   |                                | 0 (0-0)                           |                                        | 0 (0-0)                    |                                 | 0 (0-0)                            |                                         | 0 (0-0)              |                           | 0 (0-0)                      |                                   |
| 2015 | France  | 0 (0-0)                   | 0 (0-0)                        | 0 (0-0)                           | 0 (0-0)                                | 0 (0-0)                    | 0 (0-0)                         | 0 (0-0)                            | 0 (0-0)                                 | 0 (0-0)              | 0 (0-0)                   | 0 (0-0)                      | 0 (0-0)                           |
| 2000 | Gabon   | 48 (34-63)                |                                | 27 (19-35)                        |                                        | 10 (3-15)                  |                                 | 5 (2-9)                            |                                         | 0 (0-0)              |                           | 0 (0-0)                      |                                   |
| 2001 | Gabon   | 50 (35-66)                |                                | 27 (19-36)                        |                                        | 10 (3-16)                  |                                 | 5 (2-9)                            |                                         | 0 (0-0)              |                           | 0 (0-0)                      |                                   |
| 2002 | Gabon   | 52 (36-68)                |                                | 28 (20-36)                        |                                        | 10 (4-16)                  |                                 | 6 (2-9)                            |                                         | 0 (0-0)              |                           | 0 (0-0)                      |                                   |
| 2003 | Gabon   | 53 (37-70)                |                                | 28 (20-37)                        |                                        | 11 (4-17)                  |                                 | 6 (2-9)                            |                                         | 0 (0-0)              |                           | 0 (0-0)                      |                                   |
| 2004 | Gabon   | 54 (38-71)                |                                | 29 (20-38)                        |                                        | 11 (4-17)                  |                                 | 6 (2-9)                            |                                         | 0 (0-0)              |                           | 0 (0-0)                      |                                   |
| 2005 | Gabon   | 55 (39-72)                |                                | 29 (20-38)                        |                                        | 11 (4-18)                  |                                 | 6 (2-9)                            |                                         | 0 (0-0)              |                           | 0 (0-0)                      |                                   |
| 2006 | Gabon   | 55 (39-73)                |                                | 28 (20-37)                        |                                        | 11 (4-18)                  |                                 | 6 (2-9)                            |                                         | 0 (0-0)              |                           | 0 (0-0)                      |                                   |
| 2007 | Gabon   | 56 (39-73)                |                                | 28 (20-37)                        |                                        | 11 (4-18)                  |                                 | 6 (2-9)                            |                                         | 0 (0-0)              |                           | 0 (0-0)                      |                                   |
| 2008 | Gabon   | 55 (39-72)                |                                | 27 (19-36)                        |                                        | 11 (4-18)                  |                                 | 5 (2-9)                            |                                         | 0 (0-0)              |                           | 0 (0-0)                      |                                   |
| 2009 | Gabon   | 55 (39-72)                |                                | 27 (19-35)                        |                                        | 11 (4-18)                  |                                 | 5 (2-9)                            |                                         | 0 (0-0)              |                           | 0 (0-0)                      |                                   |
| 2010 | Gabon   | 18 (12-23)                |                                | 4 (1-6)                           |                                        | 2 (1-3)                    |                                 | 0 (0-0)                            |                                         | 0 (0-0)              |                           | 0 (0-0)                      |                                   |
| 2011 | Gabon   | 6 (4-8)                   |                                | 3 (2-3)                           |                                        | 1 (0-2)                    |                                 | 1 (0-1)                            |                                         | 0 (0-0)              |                           | 0 (0-0)                      |                                   |
| 2012 | Gabon   | 5 (4-7)                   |                                | 2 (2-3)                           |                                        | 1 (0-2)                    |                                 | 0 (0-1)                            |                                         | 0 (0-0)              |                           | 0 (0-0)                      |                                   |
| 2013 | Gabon   | 5 (4-7)                   |                                | 2 (2-3)                           |                                        | 1 (0-2)                    |                                 | 0 (0-1)                            |                                         | 0 (0-0)              |                           | 0 (0-0)                      |                                   |
| 2014 | Gabon   | 6 (4-8)                   |                                | 3 (2-3)                           |                                        | 1 (0-2)                    |                                 | 0 (0-1)                            |                                         | 0 (0-0)              |                           | 0 (0-0)                      |                                   |
| 2015 | Gabon   | 0 (0-1)                   | 0 (0-0)                        | 0 (0-0)                           | 0 (0-0)                                | 0 (0-0)                    | 0 (0-0)                         | 0 (0-0)                            | 0 (0-0)                                 | 0 (0-0)              | 0 (0-0)                   | 0 (0-0)                      | 0 (0-0)                           |
| 2000 | Gambia  | 11 (8-15)                 |                                | 5 (3-6)                           |                                        | 4 (2-7)                    |                                 | 2 (1-3)                            |                                         | 0 (0-0)              |                           | 0 (0-0)                      |                                   |
| 2001 | Gambia  | 12 (8-15)                 |                                | 5 (3-7)                           |                                        | 5 (2-7)                    |                                 | 2 (1-3)                            |                                         | 0 (0-0)              |                           | 0 (0-0)                      |                                   |
| 2002 | Gambia  | 12 (8-15)                 |                                | 5 (3-6)                           |                                        | 5 (2-7)                    |                                 | 2 (1-3)                            |                                         | 0 (0-0)              |                           | 0 (0-0)                      |                                   |
| 2003 | Gambia  | 1 (1-2)                   |                                | 1 (0-1)                           |                                        | 1 (0-1)                    |                                 | 0 (0-0)                            |                                         | 0 (0-0)              |                           | 0 (0-0)                      |                                   |
| 2004 | Gambia  | 1 (1-2)                   |                                | 1 (0-1)                           |                                        | 1 (0-1)                    |                                 | 0 (0-0)                            |                                         | 0 (0-0)              |                           | 0 (0-0)                      |                                   |
| 2005 | Gambia  | 1 (1-2)                   |                                | 1 (0-1)                           |                                        | 1 (0-1)                    |                                 | 0 (0-0)                            |                                         | 0 (0-0)              |                           | 0 (0-0)                      |                                   |
| 2006 | Gambia  | 1 (1-2)                   |                                | 1 (0-1)                           |                                        | 1 (0-1)                    |                                 | 0 (0-0)                            |                                         | 0 (0-0)              |                           | 0 (0-0)                      |                                   |
| 2007 | Gambia  | 1 (1-2)                   |                                | 1 (0-1)                           |                                        | 1 (0-1)                    |                                 | 0 (0-0)                            |                                         | 0 (0-0)              |                           | 0 (0-0)                      |                                   |
| 2008 | Gambia  | 1 (1-2)                   |                                | 0 (0-1)                           |                                        | 1 (0-1)                    |                                 | 0 (0-0)                            |                                         | 0 (0-0)              |                           | 0 (0-0)                      |                                   |
| 2009 | Gambia  | 1 (1-2)                   |                                | 0 (0-1)                           |                                        | 1 (0-1)                    |                                 | 0 (0-0)                            |                                         | 0 (0-0)              |                           | 0 (0-0)                      |                                   |
| 2010 | Gambia  | 1 (1-2)                   |                                | 0 (0-1)                           |                                        | 1 (0-1)                    |                                 | 0 (0-0)                            |                                         | 0 (0-0)              |                           | 0 (0-0)                      |                                   |
| 2011 | Gambia  | 1 (1-2)                   |                                | 0 (0-1)                           |                                        | 1 (0-1)                    |                                 | 0 (0-0)                            |                                         | 0 (0-0)              |                           | 0 (0-0)                      |                                   |
| 2012 | Gambia  | 1 (1-2)                   |                                | 0 (0-1)                           |                                        | 1 (0-1)                    |                                 | 0 (0-0)                            |                                         | 0 (0-0)              |                           | 0 (0-0)                      |                                   |
| 2013 | Gambia  | 1 (1-2)                   |                                | 0 (0-1)                           |                                        | 1 (0-1)                    |                                 | 0 (0-0)                            |                                         | 0 (0-0)              |                           | 0 (0-0)                      |                                   |
| 2014 | Gambia  | 1 (1-2)                   |                                | 0 (0-1)                           |                                        | 1 (0-1)                    |                                 | 0 (0-0)                            |                                         | 0 (0-0)              |                           | 0 (0-0)                      |                                   |
| 2015 | Gambia  | 1 (1-2)                   | 0 (0-0)                        | 0 (0-1)                           | 0 (0-0)                                | 1 (0-1)                    | 0 (0-0)                         | 0 (0-0)                            | 0 (0-0)                                 | 0 (0-0)              | 0 (0-0)                   | 0 (0-0)                      | 0 (0-0)                           |
| 2000 | Georgia | 36 (25-47)                |                                | 13 (8-17)                         |                                        | 12 (7-18)                  |                                 | 4 (3-7)                            |                                         | 0 (0-0)              |                           | 0 (0-0)                      |                                   |
| 2001 | Georgia | 31 (22-41)                |                                | 12 (8-16)                         |                                        | 11 (6-16)                  |                                 | 4 (2-6)                            |                                         | 0 (0-0)              |                           | 0 (0-0)                      |                                   |
| 2002 | Georgia | 28 (20-36)                |                                | 11 (8-15)                         |                                        | 10 (5-14)                  |                                 | 4 (2-6)                            |                                         | 0 (0-0)              |                           | 0 (0-0)                      |                                   |
| 2003 | Georgia | 25 (18-33)                |                                | 11 (8-14)                         |                                        | 9 (2-14)                   |                                 | 4 (1-6)                            |                                         | 0 (0-0)              |                           | 0 (0-0)                      |                                   |
| 2004 | Georgia | 23 (16-30)                |                                | 10 (7-13)                         |                                        | 8 (2-13)                   |                                 | 3 (1-6)                            |                                         | 0 (0-0)              |                           | 0 (0-0)                      |                                   |
| 2005 | Georgia | 22 (15-28)                |                                | 9 (7-12)                          |                                        | 8 (1-13)                   |                                 | 3 (1-6)                            |                                         | 0 (0-0)              |                           | 0 (0-0)                      |                                   |
| 2006 | Georgia | 20 (14-26)                |                                | 8 (6-11)                          |                                        | 7 (1-12)                   |                                 | 3 (0-5)                            |                                         | 0 (0-0)              |                           | 0 (0-0)                      |                                   |
| 2007 | Georgia | 18 (13-24)                |                                | 7 (5-9)                           |                                        | 7 (1-11)                   |                                 | 3 (0-5)                            |                                         | 0 (0-0)              |                           | 0 (0-0)                      |                                   |
| 2008 | Georgia | 16 (11-21)                |                                | 6 (5-8)                           |                                        | 6 (1-10)                   |                                 | 2 (0-4)                            |                                         | 0 (0-0)              |                           | 0 (0-0)                      |                                   |
| 2009 | Georgia | 15 (10-19)                |                                | 6 (4-8)                           |                                        | 5 (1-9)                    |                                 | 2 (0-4)                            |                                         | 0 (0-0)              |                           | 0 (0-0)                      |                                   |
| 2010 | Georgia | 5 (3-6)                   |                                | 2 (1-2)                           |                                        | 3 (0-5)                    |                                 | 1 (0-2)                            |                                         | 0 (0-0)              |                           | 0 (0-0)                      |                                   |
| 2011 | Georgia | 1 (1-1)                   |                                | 0 (0-0)                           |                                        | 1 (0-1)                    |                                 | 0 (0-0)                            |                                         | 0 (0-0)              |                           | 0 (0-0)                      |                                   |
| 2012 | Georgia | 1 (1-1)                   |                                | 0 (0-0)                           |                                        | 1 (0-1)                    |                                 | 0 (0-0)                            |                                         | 0 (0-0)              |                           | 0 (0-0)                      |                                   |
| 2013 | Georgia | 1 (1-1)                   |                                | 0 (0-0)                           |                                        | 1 (0-1)                    |                                 | 0 (0-0)                            |                                         | 0 (0-0)              |                           | 0 (0-0)                      |                                   |
| 2014 | Georgia | 1 (1-1)                   |                                | 0 (0-0)                           |                                        | 1 (0-1)                    |                                 | 0 (0-0)                            |                                         | 0 (0-0)              |                           | 0 (0-0)                      |                                   |
| 2015 | Georgia | 0 (0-0)                   | 0 (0-0)                        | 0 (0-0)                           | 0 (0-0)                                | 0 (0-0)                    | 0 (0-0)                         | 0 (0-0)                            | 0 (0-0)                                 | 0 (0-0)              | 0 (0-0)                   | 0 (0-0)                      | 0 (0-0)                           |
| 2000 | Germany | 0 (0-0)                   |                                | 0 (0-0)                           |                                        | 0 (0-0)                    |                                 | 0 (0-0)                            |                                         | 0 (0-0)              |                           | 0 (0-0)                      |                                   |
| 2001 | Germany | 0 (0-0)                   |                                | 0 (0-0)                           |                                        | 0 (0-0)                    |                                 | 0 (0-0)                            |                                         | 0 (0-0)              |                           | 0 (0-0)                      |                                   |
| 2002 | Germany | 0 (0-0)                   |                                | 0 (0-0)                           |                                        | 0 (0-0)                    |                                 | 0 (0-0)                            |                                         | 0 (0-0)              |                           | 0 (0-0)                      |                                   |
| 2003 | Germany | 0 (0-0)                   |                                | 0 (0-0)                           |                                        | 0 (0-0)                    |                                 | 0 (0-0)                            |                                         | 0 (0-0)              |                           | 0 (0-0)                      |                                   |
| 2004 | Germany | 0 (0-0)                   |                                | 0 (0-0)                           |                                        | 0 (0-0)                    |                                 | 0 (0-0)                            |                                         | 0 (0-0)              |                           | 0 (0-0)                      |                                   |
| 2005 | Germany | 0 (0-0)                   |                                | 0 (0-0)                           |                                        | 0 (0-0)                    |                                 | 0 (0-0)                            |                                         | 0 (0-0)              |                           | 0 (0-0)                      |                                   |
| 2006 | Germany | 0 (0-0)                   |                                | 0 (0-0)                           |                                        | 0 (0-0)                    |                                 | 0 (0-0)                            |                                         | 0 (0-0)              |                           | 0 (0-0)                      |                                   |
| 2007 | Germany | 0 (0-0)                   |                                | 0 (0-0)                           |                                        | 0 (0-0)                    |                                 | 0 (0-0)                            |                                         | 0 (0-0)              |                           | 0 (0-0)                      |                                   |
| 2008 | Germany | 0 (0-0)                   |                                | 0 (0-0)                           |                                        | 0 (0-0)                    |                                 | 0 (0-0)                            |                                         | 0 (0-0)              |                           | 0 (0-0)                      |                                   |
| 2009 | Germany | 0 (0-0)                   |                                | 0 (0-0)                           |                                        | 0 (0-0)                    |                                 | 0 (0-0)                            |                                         | 0 (0-0)              |                           | 0 (0-0)                      |                                   |
| 2010 | Germany | 0 (0-0)                   |                                | 0 (0-0)                           |                                        | 0 (0-0)                    |                                 | 0 (0-0)                            |                                         | 0 (0-0)              |                           | 0 (0-0)                      |                                   |
| 2011 | Germany | 0 (0-0)                   |                                | 0 (0-0)                           |                                        | 0 (0-0)                    |                                 | 0 (0-0)                            |                                         | 0 (0-0)              |                           | 0 (0-0)                      |                                   |
| 2012 | Germany | 0 (0-0)                   |                                | 0 (0-0)                           |                                        | 0 (0-0)                    |                                 | 0 (0-0)                            |                                         | 0 (0-0)              |                           | 0 (0-0)                      |                                   |
| 2013 | Germany | 0 (0-0)                   |                                | 0 (0-0)                           |                                        | 0 (0-0)                    |                                 | 0 (0-0)                            |                                         | 0 (0-0)              |                           | 0 (0-0)                      |                                   |
| 2014 | Germany | 0 (0-0)                   |                                | 0 (0-0)                           |                                        | 0 (0-0)                    |                                 | 0 (0-0)                            |                                         | 0 (0-0)              |                           | 0 (0-0)                      |                                   |
| 2015 | Germany | 0 (0-0)                   | 0 (0-0)                        | 0 (0-0)                           | 0 (0-0)                                | 0 (0-0)                    | 0 (0-0)                         | 0 (0-0)                            | 0 (0-0)                                 | 0 (0-0)              | 0 (0-0)                   | 0 (0-0)                      | 0 (0-0)                           |

Hib = *Haemophilus influenzae* type b; npnm = non-pneumonia, non-meningitis; HIV = deaths only in HIV-infected children; Uncertainty range provided in parentheses.

| Year | Country   | Hib pneumonia deaths           |                                   |                                        |                                        | Hib meningitis deaths           |                                    |                                         |                                         | Hib NPNM deaths, HIV      |                              |                                   |                                   |
|------|-----------|--------------------------------|-----------------------------------|----------------------------------------|----------------------------------------|---------------------------------|------------------------------------|-----------------------------------------|-----------------------------------------|---------------------------|------------------------------|-----------------------------------|-----------------------------------|
|      |           | Hib pneumonia deaths, HIV (UR) | Hib pneumonia mortality rate (UR) | Hib pneumonia mortality rate, HIV (UR) | Hib pneumonia mortality rate, HIV (UR) | Hib meningitis deaths, HIV (UR) | Hib meningitis mortality rate (UR) | Hib meningitis mortality rate, HIV (UR) | Hib meningitis mortality rate, HIV (UR) | Hib NPNM deaths, HIV (UR) | Hib NPNM mortality rate (UR) | Hib NPNM mortality rate, HIV (UR) | Hib NPNM mortality rate, HIV (UR) |
| 2015 | Germany   | 0 (0-0)                        | 0 (0-0)                           | 0 (0-0)                                | 0 (0-0)                                | 0 (0-0)                         | 0 (0-0)                            | 0 (0-0)                                 | 0 (0-0)                                 | 0 (0-0)                   | 0 (0-0)                      | 0 (0-0)                           | 0 (0-0)                           |
| 2000 | Ghana     | 955 (672-1255)                 | 34 (24-45)                        | 34 (24-45)                             | 346 (124-548)                          | 12 (4-19)                       | 12 (4-19)                          | 12 (4-19)                               | 1 (1-2)                                 | 0 (0-0)                   | 0 (0-0)                      | 0 (0-0)                           | 0 (0-0)                           |
| 2001 | Ghana     | 984 (692-1293)                 | 34 (24-45)                        | 34 (24-45)                             | 354 (123-565)                          | 12 (4-20)                       | 12 (4-20)                          | 12 (4-20)                               | 1 (1-2)                                 | 0 (0-0)                   | 0 (0-0)                      | 0 (0-0)                           | 0 (0-0)                           |
| 2002 | Ghana     | 171 (120-225)                  | 6 (4-8)                           | 6 (4-8)                                | 61 (21-98)                             | 2 (1-3)                         | 2 (1-3)                            | 2 (1-3)                                 | 0 (0-0)                                 | 0 (0-0)                   | 0 (0-0)                      | 0 (0-0)                           | 0 (0-0)                           |
| 2003 | Ghana     | 103 (72-135)                   | 3 (2-5)                           | 3 (2-5)                                | 37 (12-89)                             | 1 (0-2)                         | 1 (0-2)                            | 1 (0-2)                                 | 0 (0-0)                                 | 0 (0-0)                   | 0 (0-0)                      | 0 (0-0)                           | 0 (0-0)                           |
| 2004 | Ghana     | 108 (76-141)                   | 4 (2-5)                           | 4 (2-5)                                | 38 (12-92)                             | 1 (0-2)                         | 1 (0-2)                            | 1 (0-2)                                 | 0 (0-0)                                 | 0 (0-0)                   | 0 (0-0)                      | 0 (0-0)                           | 0 (0-0)                           |
| 2005 | Ghana     | 103 (73-136)                   | 3 (2-4)                           | 3 (2-4)                                | 36 (11-55)                             | 1 (0-2)                         | 1 (0-2)                            | 1 (0-2)                                 | 0 (0-0)                                 | 0 (0-0)                   | 0 (0-0)                      | 0 (0-0)                           | 0 (0-0)                           |
| 2006 | Ghana     | 107 (76-141)                   | 3 (2-4)                           | 3 (2-4)                                | 38 (11-62)                             | 1 (0-2)                         | 1 (0-2)                            | 1 (0-2)                                 | 0 (0-0)                                 | 0 (0-0)                   | 0 (0-0)                      | 0 (0-0)                           | 0 (0-0)                           |
| 2007 | Ghana     | 12 (8-15)                      | 0 (0-0)                           | 0 (0-0)                                | 4 (1-7)                                | 0 (0-0)                         | 0 (0-0)                            | 0 (0-0)                                 | 0 (0-0)                                 | 0 (0-0)                   | 0 (0-0)                      | 0 (0-0)                           | 0 (0-0)                           |
| 2008 | Ghana     | 11 (8-15)                      | 0 (0-0)                           | 0 (0-0)                                | 4 (1-6)                                | 0 (0-0)                         | 0 (0-0)                            | 0 (0-0)                                 | 0 (0-0)                                 | 0 (0-0)                   | 0 (0-0)                      | 0 (0-0)                           | 0 (0-0)                           |
| 2009 | Ghana     | 11 (8-15)                      | 0 (0-0)                           | 0 (0-0)                                | 4 (1-6)                                | 0 (0-0)                         | 0 (0-0)                            | 0 (0-0)                                 | 0 (0-0)                                 | 0 (0-0)                   | 0 (0-0)                      | 0 (0-0)                           | 0 (0-0)                           |
| 2010 | Ghana     | 11 (8-14)                      | 0 (0-0)                           | 0 (0-0)                                | 4 (1-6)                                | 0 (0-0)                         | 0 (0-0)                            | 0 (0-0)                                 | 0 (0-0)                                 | 0 (0-0)                   | 0 (0-0)                      | 0 (0-0)                           | 0 (0-0)                           |
| 2011 | Ghana     | 11 (8-15)                      | 0 (0-0)                           | 0 (0-0)                                | 4 (1-6)                                | 0 (0-0)                         | 0 (0-0)                            | 0 (0-0)                                 | 0 (0-0)                                 | 0 (0-0)                   | 0 (0-0)                      | 0 (0-0)                           | 0 (0-0)                           |
| 2012 | Ghana     | 11 (8-15)                      | 0 (0-0)                           | 0 (0-0)                                | 4 (1-6)                                | 0 (0-0)                         | 0 (0-0)                            | 0 (0-0)                                 | 0 (0-0)                                 | 0 (0-0)                   | 0 (0-0)                      | 0 (0-0)                           | 0 (0-0)                           |
| 2013 | Ghana     | 12 (8-15)                      | 0 (0-0)                           | 0 (0-0)                                | 4 (1-6)                                | 0 (0-0)                         | 0 (0-0)                            | 0 (0-0)                                 | 0 (0-0)                                 | 0 (0-0)                   | 0 (0-0)                      | 0 (0-0)                           | 0 (0-0)                           |
| 2014 | Ghana     | 12 (8-15)                      | 0 (0-0)                           | 0 (0-0)                                | 4 (1-6)                                | 0 (0-0)                         | 0 (0-0)                            | 0 (0-0)                                 | 0 (0-0)                                 | 0 (0-0)                   | 0 (0-0)                      | 0 (0-0)                           | 0 (0-0)                           |
| 2015 | Ghana     | 12 (8-15)                      | 0 (0-0)                           | 0 (0-0)                                | 4 (1-6)                                | 0 (0-0)                         | 0 (0-0)                            | 0 (0-0)                                 | 0 (0-0)                                 | 0 (0-0)                   | 0 (0-0)                      | 0 (0-0)                           | 0 (0-0)                           |
| 2000 | Greece    | 0 (0-0)                        | 0 (0-0)                           | 0 (0-0)                                | 0 (0-0)                                | 0 (0-0)                         | 0 (0-0)                            | 0 (0-0)                                 | 0 (0-0)                                 | 0 (0-0)                   | 0 (0-0)                      | 0 (0-0)                           | 0 (0-0)                           |
| 2001 | Greece    | 0 (0-0)                        | 0 (0-0)                           | 0 (0-0)                                | 0 (0-0)                                | 0 (0-0)                         | 0 (0-0)                            | 0 (0-0)                                 | 0 (0-0)                                 | 0 (0-0)                   | 0 (0-0)                      | 0 (0-0)                           | 0 (0-0)                           |
| 2002 | Greece    | 0 (0-0)                        | 0 (0-0)                           | 0 (0-0)                                | 0 (0-0)                                | 0 (0-0)                         | 0 (0-0)                            | 0 (0-0)                                 | 0 (0-0)                                 | 0 (0-0)                   | 0 (0-0)                      | 0 (0-0)                           | 0 (0-0)                           |
| 2003 | Greece    | 0 (0-0)                        | 0 (0-0)                           | 0 (0-0)                                | 0 (0-0)                                | 0 (0-0)                         | 0 (0-0)                            | 0 (0-0)                                 | 0 (0-0)                                 | 0 (0-0)                   | 0 (0-0)                      | 0 (0-0)                           | 0 (0-0)                           |
| 2004 | Greece    | 0 (0-0)                        | 0 (0-0)                           | 0 (0-0)                                | 0 (0-0)                                | 0 (0-0)                         | 0 (0-0)                            | 0 (0-0)                                 | 0 (0-0)                                 | 0 (0-0)                   | 0 (0-0)                      | 0 (0-0)                           | 0 (0-0)                           |
| 2005 | Greece    | 0 (0-0)                        | 0 (0-0)                           | 0 (0-0)                                | 0 (0-0)                                | 0 (0-0)                         | 0 (0-0)                            | 0 (0-0)                                 | 0 (0-0)                                 | 0 (0-0)                   | 0 (0-0)                      | 0 (0-0)                           | 0 (0-0)                           |
| 2006 | Greece    | 0 (0-0)                        | 0 (0-0)                           | 0 (0-0)                                | 0 (0-0)                                | 0 (0-0)                         | 0 (0-0)                            | 0 (0-0)                                 | 0 (0-0)                                 | 0 (0-0)                   | 0 (0-0)                      | 0 (0-0)                           | 0 (0-0)                           |
| 2007 | Greece    | 0 (0-0)                        | 0 (0-0)                           | 0 (0-0)                                | 0 (0-0)                                | 0 (0-0)                         | 0 (0-0)                            | 0 (0-0)                                 | 0 (0-0)                                 | 0 (0-0)                   | 0 (0-0)                      | 0 (0-0)                           | 0 (0-0)                           |
| 2008 | Greece    | 0 (0-0)                        | 0 (0-0)                           | 0 (0-0)                                | 0 (0-0)                                | 0 (0-0)                         | 0 (0-0)                            | 0 (0-0)                                 | 0 (0-0)                                 | 0 (0-0)                   | 0 (0-0)                      | 0 (0-0)                           | 0 (0-0)                           |
| 2009 | Greece    | 0 (0-0)                        | 0 (0-0)                           | 0 (0-0)                                | 0 (0-0)                                | 0 (0-0)                         | 0 (0-0)                            | 0 (0-0)                                 | 0 (0-0)                                 | 0 (0-0)                   | 0 (0-0)                      | 0 (0-0)                           | 0 (0-0)                           |
| 2010 | Greece    | 0 (0-0)                        | 0 (0-0)                           | 0 (0-0)                                | 0 (0-0)                                | 0 (0-0)                         | 0 (0-0)                            | 0 (0-0)                                 | 0 (0-0)                                 | 0 (0-0)                   | 0 (0-0)                      | 0 (0-0)                           | 0 (0-0)                           |
| 2011 | Greece    | 0 (0-0)                        | 0 (0-0)                           | 0 (0-0)                                | 0 (0-0)                                | 0 (0-0)                         | 0 (0-0)                            | 0 (0-0)                                 | 0 (0-0)                                 | 0 (0-0)                   | 0 (0-0)                      | 0 (0-0)                           | 0 (0-0)                           |
| 2012 | Greece    | 0 (0-0)                        | 0 (0-0)                           | 0 (0-0)                                | 0 (0-0)                                | 0 (0-0)                         | 0 (0-0)                            | 0 (0-0)                                 | 0 (0-0)                                 | 0 (0-0)                   | 0 (0-0)                      | 0 (0-0)                           | 0 (0-0)                           |
| 2013 | Greece    | 0 (0-0)                        | 0 (0-0)                           | 0 (0-0)                                | 0 (0-0)                                | 0 (0-0)                         | 0 (0-0)                            | 0 (0-0)                                 | 0 (0-0)                                 | 0 (0-0)                   | 0 (0-0)                      | 0 (0-0)                           | 0 (0-0)                           |
| 2014 | Greece    | 0 (0-0)                        | 0 (0-0)                           | 0 (0-0)                                | 0 (0-0)                                | 0 (0-0)                         | 0 (0-0)                            | 0 (0-0)                                 | 0 (0-0)                                 | 0 (0-0)                   | 0 (0-0)                      | 0 (0-0)                           | 0 (0-0)                           |
| 2015 | Greece    | 0 (0-0)                        | 0 (0-0)                           | 0 (0-0)                                | 0 (0-0)                                | 0 (0-0)                         | 0 (0-0)                            | 0 (0-0)                                 | 0 (0-0)                                 | 0 (0-0)                   | 0 (0-0)                      | 0 (0-0)                           | 0 (0-0)                           |
| 2000 | Grenada   | 0 (0-1)                        | 5 (3-6)                           | 5 (3-6)                                | 0 (0-0)                                | 0 (0-0)                         | 0 (0-0)                            | 0 (0-0)                                 | 0 (0-0)                                 | 0 (0-0)                   | 0 (0-0)                      | 0 (0-0)                           | 0 (0-0)                           |
| 2001 | Grenada   | 0 (0-0)                        | 0 (0-0)                           | 0 (0-0)                                | 0 (0-0)                                | 0 (0-0)                         | 0 (0-0)                            | 0 (0-0)                                 | 0 (0-0)                                 | 0 (0-0)                   | 0 (0-0)                      | 0 (0-0)                           | 0 (0-0)                           |
| 2002 | Grenada   | 0 (0-0)                        | 0 (0-0)                           | 0 (0-0)                                | 0 (0-0)                                | 0 (0-0)                         | 0 (0-0)                            | 0 (0-0)                                 | 0 (0-0)                                 | 0 (0-0)                   | 0 (0-0)                      | 0 (0-0)                           | 0 (0-0)                           |
| 2003 | Grenada   | 0 (0-0)                        | 0 (0-0)                           | 0 (0-0)                                | 0 (0-0)                                | 0 (0-0)                         | 0 (0-0)                            | 0 (0-0)                                 | 0 (0-0)                                 | 0 (0-0)                   | 0 (0-0)                      | 0 (0-0)                           | 0 (0-0)                           |
| 2004 | Grenada   | 0 (0-0)                        | 0 (0-0)                           | 0 (0-0)                                | 0 (0-0)                                | 0 (0-0)                         | 0 (0-0)                            | 0 (0-0)                                 | 0 (0-0)                                 | 0 (0-0)                   | 0 (0-0)                      | 0 (0-0)                           | 0 (0-0)                           |
| 2005 | Grenada   | 0 (0-0)                        | 0 (0-0)                           | 0 (0-0)                                | 0 (0-0)                                | 0 (0-0)                         | 0 (0-0)                            | 0 (0-0)                                 | 0 (0-0)                                 | 0 (0-0)                   | 0 (0-0)                      | 0 (0-0)                           | 0 (0-0)                           |
| 2006 | Grenada   | 0 (0-0)                        | 0 (0-0)                           | 0 (0-0)                                | 0 (0-0)                                | 0 (0-0)                         | 0 (0-0)                            | 0 (0-0)                                 | 0 (0-0)                                 | 0 (0-0)                   | 0 (0-0)                      | 0 (0-0)                           | 0 (0-0)                           |
| 2007 | Grenada   | 0 (0-0)                        | 0 (0-0)                           | 0 (0-0)                                | 0 (0-0)                                | 0 (0-0)                         | 0 (0-0)                            | 0 (0-0)                                 | 0 (0-0)                                 | 0 (0-0)                   | 0 (0-0)                      | 0 (0-0)                           | 0 (0-0)                           |
| 2008 | Grenada   | 0 (0-0)                        | 0 (0-0)                           | 0 (0-0)                                | 0 (0-0)                                | 0 (0-0)                         | 0 (0-0)                            | 0 (0-0)                                 | 0 (0-0)                                 | 0 (0-0)                   | 0 (0-0)                      | 0 (0-0)                           | 0 (0-0)                           |
| 2009 | Grenada   | 0 (0-0)                        | 0 (0-0)                           | 0 (0-0)                                | 0 (0-0)                                | 0 (0-0)                         | 0 (0-0)                            | 0 (0-0)                                 | 0 (0-0)                                 | 0 (0-0)                   | 0 (0-0)                      | 0 (0-0)                           | 0 (0-0)                           |
| 2010 | Grenada   | 0 (0-0)                        | 0 (0-0)                           | 0 (0-0)                                | 0 (0-0)                                | 0 (0-0)                         | 0 (0-0)                            | 0 (0-0)                                 | 0 (0-0)                                 | 0 (0-0)                   | 0 (0-0)                      | 0 (0-0)                           | 0 (0-0)                           |
| 2011 | Grenada   | 0 (0-0)                        | 0 (0-0)                           | 0 (0-0)                                | 0 (0-0)                                | 0 (0-0)                         | 0 (0-0)                            | 0 (0-0)                                 | 0 (0-0)                                 | 0 (0-0)                   | 0 (0-0)                      | 0 (0-0)                           | 0 (0-0)                           |
| 2012 | Grenada   | 0 (0-0)                        | 0 (0-0)                           | 0 (0-0)                                | 0 (0-0)                                | 0 (0-0)                         | 0 (0-0)                            | 0 (0-0)                                 | 0 (0-0)                                 | 0 (0-0)                   | 0 (0-0)                      | 0 (0-0)                           | 0 (0-0)                           |
| 2013 | Grenada   | 0 (0-0)                        | 0 (0-0)                           | 0 (0-0)                                | 0 (0-0)                                | 0 (0-0)                         | 0 (0-0)                            | 0 (0-0)                                 | 0 (0-0)                                 | 0 (0-0)                   | 0 (0-0)                      | 0 (0-0)                           | 0 (0-0)                           |
| 2014 | Grenada   | 0 (0-0)                        | 0 (0-0)                           | 0 (0-0)                                | 0 (0-0)                                | 0 (0-0)                         | 0 (0-0)                            | 0 (0-0)                                 | 0 (0-0)                                 | 0 (0-0)                   | 0 (0-0)                      | 0 (0-0)                           | 0 (0-0)                           |
| 2015 | Grenada   | 0 (0-0)                        | 0 (0-0)                           | 0 (0-0)                                | 0 (0-0)                                | 0 (0-0)                         | 0 (0-0)                            | 0 (0-0)                                 | 0 (0-0)                                 | 0 (0-0)                   | 0 (0-0)                      | 0 (0-0)                           | 0 (0-0)                           |
| 2000 | Guatemala | 635 (446-834)                  | 34 (24-45)                        | 34 (24-45)                             | 179 (55-295)                           | 10 (3-16)                       | 10 (3-16)                          | 10 (3-16)                               | 1 (0-2)                                 | 0 (0-0)                   | 0 (0-0)                      | 0 (0-0)                           | 0 (0-0)                           |
| 2001 | Guatemala | 612 (431-805)                  | 33 (23-43)                        | 33 (23-43)                             | 173 (54-285)                           | 9 (3-15)                        | 9 (3-15)                           | 9 (3-15)                                | 1 (0-2)                                 | 0 (0-0)                   | 0 (0-0)                      | 0 (0-0)                           | 0 (0-0)                           |
| 2002 | Guatemala | 590 (415-776)                  | 31 (22-41)                        | 31 (22-41)                             | 167 (53-274)                           | 9 (3-15)                        | 9 (3-15)                           | 9 (3-15)                                | 1 (0-2)                                 | 0 (0-0)                   | 0 (0-0)                      | 0 (0-0)                           | 0 (0-0)                           |
| 2003 | Guatemala | 567 (399-745)                  | 30 (21-39)                        | 30 (21-39)                             | 161 (51-263)                           | 8 (3-14)                        | 8 (3-14)                           | 8 (3-14)                                | 1 (0-2)                                 | 0 (0-0)                   | 0 (0-0)                      | 0 (0-0)                           | 0 (0-0)                           |
| 2004 | Guatemala | 547 (385-718)                  | 28 (20-37)                        | 28 (20-37)                             | 155 (49-253)                           | 8 (3-13)                        | 8 (3-13)                           | 8 (3-13)                                | 1 (0-2)                                 | 0 (0-0)                   | 0 (0-0)                      | 0 (0-0)                           | 0 (0-0)                           |
| 2005 | Guatemala | 85 (60-112)                    | 4 (3-6)                           | 4 (3-6)                                | 24 (8-39)                              | 1 (0-2)                         | 1 (0-2)                            | 1 (0-2)                                 | 0 (0-0)                                 | 0 (0-0)                   | 0 (0-0)                      | 0 (0-0)                           | 0 (0-0)                           |
| 2006 | Guatemala | 42 (29-55)                     | 2 (2-3)                           | 2 (2-3)                                | 12 (4-19)                              | 1 (0-1)                         | 1 (0-1)                            | 1 (0-1)                                 | 0 (0-0)                                 | 0 (0-0)                   | 0 (0-0)                      | 0 (0-0)                           | 0 (0-0)                           |
| 2007 | Guatemala | 43 (30-57)                     | 2 (2-3)                           | 2 (2-3)                                | 12 (4-20)                              | 1 (0-1)                         | 1 (0-1)                            | 1 (0-1)                                 | 0 (0-0)                                 | 0 (0-0)                   | 0 (0-0)                      | 0 (0-0)                           | 0 (0-0)                           |
| 2008 | Guatemala | 33 (23-44)                     | 2 (1-2)                           | 2 (1-2)                                | 9 (3-15)                               | 0 (0-1)                         | 0 (0-1)                            | 0 (0-1)                                 | 0 (0-0)                                 | 0 (0-0)                   | 0 (0-0)                      | 0 (0-0)                           | 0 (0-0)                           |
| 2009 | Guatemala | 34 (24-45)                     | 2 (1-2)                           | 2 (1-2)                                | 10 (3-15)                              | 0 (0-1)                         | 0 (0-1)                            | 0 (0-1)                                 | 0 (0-0)                                 | 0 (0-0)                   | 0 (0-0)                      | 0 (0-0)                           | 0 (0-0)                           |
| 2010 | Guatemala | 4 (3-6)                        | 1 (0-0)                           | 1 (0-0)                                | 1 (0-2)                                | 0 (0-0)                         | 0 (0-0)                            | 0 (0-0)                                 | 0 (0-0)                                 | 0 (0-0)                   | 0 (0-0)                      | 0 (0-0)                           | 0 (0-0)                           |
| 2011 | Guatemala | 4 (3-6)                        | 0 (0-0)                           | 0 (0-0)                                | 1 (0-2)                                | 0 (0-0)                         | 0 (0-0)                            | 0 (0-0)                                 | 0 (0-0)                                 | 0 (0-0)                   | 0 (0-0)                      | 0 (0-0)                           | 0 (0-0)                           |
| 2012 | Guatemala | 4 (3-5)                        | 0 (0-0)                           | 0 (0-0)                                | 1 (0-2)                                | 0 (0-0)                         | 0 (0-0)                            | 0 (0-0)                                 | 0 (0-0)                                 | 0 (0-0)                   | 0 (0-0)                      | 0 (0-0)                           | 0 (0-0)                           |
| 2013 | Guatemala | 4 (3-5)                        | 0 (0-0)                           | 0 (0-0)                                | 1 (0-2)                                | 0 (0-0)                         | 0 (0-0)                            | 0 (0-0)                                 | 0 (0-0)                                 | 0 (0-0)                   | 0 (0-0)                      | 0 (0-0)                           | 0 (0-0)                           |
| 2014 | Guatemala | 4 (3-5)                        | 0 (0-0)                           | 0 (0-0)                                | 1 (0-2)                                | 0 (0-0)                         | 0 (0-0)                            | 0 (0-0)                                 | 0 (0-0)                                 | 0 (0-0)                   | 0 (0-0)                      | 0 (0-0)                           | 0 (0-0)                           |
| 2015 | Guatemala | 4 (3-5)                        | 0 (0-0)                           | 0 (0-0)                                | 1 (0-2)                                | 0 (0-0)                         | 0 (0-0)                            | 0 (0-0)                                 | 0 (0-0)                                 | 0 (0-0)                   | 0 (0-0)                      | 0 (0-0)                           | 0 (0-0)                           |
| 2000 | Guinea    | 1148 (808-1509)                | 76 (53-100)                       | 76 (53-100)                            | 503 (218-763)                          | 33 (14-50)                      | 33 (14-50)                         | 33 (14-50)                              | 2 (1-3)                                 | 0 (0-0)                   | 0 (0-0)                      | 0 (0-0)                           | 0 (0-0)                           |
| 2001 | Guinea    | 1148 (808-1509)                | 75 (52-98)                        | 75 (52-98)                             | 502 (222-756)                          | 33 (14-49)                      | 33 (14-49)                         | 33 (14-49)                              | 2 (1-3)                                 | 0 (0-0)                   | 0 (0-0)                      | 0 (0-0)                           | 0 (0-0)                           |
| 2002 | Guinea    | 1140 (802-1498)                | 73 (51-96)                        | 73 (51-96)                             | 497 (224-744)                          | 32 (14-48)                      | 32 (14-48)                         | 32 (14-48)                              | 2 (1-3)                                 | 0 (0-0)                   | 0 (0-0)                      | 0 (0-0)                           | 0 (0-0)                           |
| 2003 | Guinea    | 1129 (794-1483)                | 72 (50-94)                        | 72 (50-94)                             | 494 (149-809)                          | 31 (9-51)                       | 31 (9-51)                          | 31 (9-51)                               | 2 (1-3)                                 | 0 (0-0)                   | 0 (0-0)                      | 0 (0-0)                           | 0 (0-0)                           |
| 2004 | Guinea    | 1127 (793-1481)                | 70 (50-93)                        | 70 (50-93)                             | 494 (155-805)                          | 31 (10-50)                      | 31 (10-50)                         | 31 (10-50)                              | 2 (1-3)                                 | 0 (0-0)                   | 0 (0-0)                      | 0 (0-0)                           | 0 (0-0)                           |
| 2005 | Guinea    | 1126 (792-1480)                | 69 (49-91)                        | 69 (49-91)                             | 496 (160-801)                          | 30 (10-49)                      | 30 (10-49)                         | 30 (10-49)                              | 2 (1-3)                                 | 0 (0-0)                   | 0 (0-0)                      | 0 (0-0)                           | 0 (0-0)                           |
| 2006 | Guinea    | 1127 (792-1480)                | 68 (48-89)                        | 68 (48-89)                             | 497 (160-805)                          | 30 (10-48)                      | 30 (10-48)                         | 30 (10-48)                              | 2 (1-3)                                 | 0 (0-0)                   | 0 (0-0)                      | 0 (0-0)                           | 0 (0-0)                           |
| 2007 | Guinea    | 1127 (793-1481)                | 67 (47-87)                        | 67 (47-87)                             | 499 (160-808)                          | 29 (9-48)                       | 29 (9-48)                          | 29 (9-48)                               | 2 (1-3)                                 | 0 (0-0)                   | 0 (0-0)                      | 0 (0-0)                           | 0 (0-0)                           |
| 2008 | Guinea    | 1085 (763-1426)                | 63 (44-83)                        | 63 (44-83)                             | 481 (153-781)                          | 28 (9-45)                       | 28 (9-45)                          | 28 (9-45)                               | 2 (1-3)                                 | 0 (0-0)                   | 0 (0-0)                      | 0 (0-0)                           | 0 (0-0)                           |
| 2009 |           |                                |                                   |                                        |                                        |                                 |                                    |                                         |                                         |                           |                              |                                   |                                   |

| Year | Country       | Hib pneumonia deaths (UR) | Hib pneumonia deaths, HIV (UR) | Hib pneumonia mortality rate (UR) | Hib pneumonia mortality rate, HIV (UR) | Hib meningitis deaths (UR) | Hib meningitis deaths, HIV (UR) | Hib meningitis mortality rate (UR) | Hib meningitis mortality rate, HIV (UR) | Hib NPNM deaths (UR) | Hib NPNM deaths, HIV (UR) | Hib NPNM mortality rate (UR) | Hib NPNM mortality rate, HIV (UR) |
|------|---------------|---------------------------|--------------------------------|-----------------------------------|----------------------------------------|----------------------------|---------------------------------|------------------------------------|-----------------------------------------|----------------------|---------------------------|------------------------------|-----------------------------------|
| 2007 | Guinea-Bissau | 192 (135-252)             |                                | 79 (56-104)                       |                                        | 79 (29-125)                |                                 | 33 (12-52)                         |                                         | 0 (0-1)              |                           | 0 (0-0)                      |                                   |
| 2008 | Guinea-Bissau | 183 (129-241)             |                                | 74 (52-98)                        |                                        | 75 (27-119)                |                                 | 31 (11-48)                         |                                         | 0 (0-0)              |                           | 0 (0-0)                      |                                   |
| 2009 | Guinea-Bissau | 29 (21-38)                |                                | 12 (8-15)                         |                                        | 12 (4-19)                  |                                 | 5 (2-8)                            |                                         | 0 (0-0)              |                           | 0 (0-0)                      |                                   |
| 2010 | Guinea-Bissau | 17 (12-22)                |                                | 6 (5-8)                           |                                        | 7 (2-11)                   |                                 | 3 (1-4)                            |                                         | 0 (0-0)              |                           | 0 (0-0)                      |                                   |
| 2011 | Guinea-Bissau | 16 (11-21)                |                                | 6 (4-8)                           |                                        | 7 (2-10)                   |                                 | 2 (1-4)                            |                                         | 0 (0-0)              |                           | 0 (0-0)                      |                                   |
| 2012 | Guinea-Bissau | 15 (11-20)                |                                | 6 (4-8)                           |                                        | 6 (2-10)                   |                                 | 2 (1-4)                            |                                         | 0 (0-0)              |                           | 0 (0-0)                      |                                   |
| 2013 | Guinea-Bissau | 15 (11-20)                |                                | 5 (4-7)                           |                                        | 6 (2-10)                   |                                 | 2 (1-4)                            |                                         | 0 (0-0)              |                           | 0 (0-0)                      |                                   |
| 2014 | Guinea-Bissau | 1 (1-2)                   | 0 (0-0)                        | 1 (0-1)                           | 0 (0-0)                                | 1 (0-1)                    | 0 (0-0)                         | 0 (0-0)                            | 0 (0-0)                                 | 0 (0-0)              | 0 (0-0)                   | 0 (0-0)                      | 0 (0-0)                           |
| 2015 | Guinea-Bissau | 1 (1-2)                   | 0 (0-0)                        | 1 (0-1)                           | 0 (0-0)                                | 1 (0-1)                    | 0 (0-0)                         | 0 (0-0)                            | 0 (0-0)                                 | 0 (0-0)              | 0 (0-0)                   | 0 (0-0)                      | 0 (0-0)                           |
| 2000 | Guyana        | 10 (7-13)                 |                                | 10 (7-14)                         |                                        | 2 (1-3)                    |                                 | 2 (1-4)                            |                                         | 0 (0-0)              |                           | 0 (0-0)                      |                                   |
| 2001 | Guyana        | 1 (1-2)                   |                                | 2 (1-2)                           |                                        | 1 (0-1)                    |                                 | 1 (0-2)                            |                                         | 0 (0-0)              |                           | 0 (0-0)                      |                                   |
| 2002 | Guyana        | 1 (1-1)                   |                                | 1 (1-1)                           |                                        | 0 (0-1)                    |                                 | 0 (0-1)                            |                                         | 0 (0-0)              |                           | 0 (0-0)                      |                                   |
| 2003 | Guyana        | 1 (0-1)                   |                                | 1 (1-1)                           |                                        | 0 (0-1)                    |                                 | 0 (0-1)                            |                                         | 0 (0-0)              |                           | 0 (0-0)                      |                                   |
| 2004 | Guyana        | 1 (1-1)                   |                                | 1 (1-1)                           |                                        | 0 (0-1)                    |                                 | 0 (0-1)                            |                                         | 0 (0-0)              |                           | 0 (0-0)                      |                                   |
| 2005 | Guyana        | 1 (0-1)                   |                                | 1 (1-1)                           |                                        | 0 (0-1)                    |                                 | 0 (0-1)                            |                                         | 0 (0-0)              |                           | 0 (0-0)                      |                                   |
| 2006 | Guyana        | 0 (0-0)                   |                                | 0 (0-0)                           |                                        | 0 (0-0)                    |                                 | 0 (0-0)                            |                                         | 0 (0-0)              |                           | 0 (0-0)                      |                                   |
| 2007 | Guyana        | 0 (0-0)                   |                                | 0 (0-0)                           |                                        | 0 (0-0)                    |                                 | 0 (0-0)                            |                                         | 0 (0-0)              |                           | 0 (0-0)                      |                                   |
| 2008 | Guyana        | 0 (0-0)                   |                                | 0 (0-0)                           |                                        | 0 (0-0)                    |                                 | 0 (0-0)                            |                                         | 0 (0-0)              |                           | 0 (0-0)                      |                                   |
| 2009 | Guyana        | 0 (0-0)                   |                                | 0 (0-0)                           |                                        | 0 (0-0)                    |                                 | 0 (0-0)                            |                                         | 0 (0-0)              |                           | 0 (0-0)                      |                                   |
| 2010 | Guyana        | 0 (0-0)                   |                                | 0 (0-0)                           |                                        | 0 (0-0)                    |                                 | 0 (0-0)                            |                                         | 0 (0-0)              |                           | 0 (0-0)                      |                                   |
| 2011 | Guyana        | 0 (0-0)                   |                                | 0 (0-0)                           |                                        | 0 (0-0)                    |                                 | 0 (0-0)                            |                                         | 0 (0-0)              |                           | 0 (0-0)                      |                                   |
| 2012 | Guyana        | 0 (0-0)                   |                                | 0 (0-0)                           |                                        | 0 (0-0)                    |                                 | 0 (0-0)                            |                                         | 0 (0-0)              |                           | 0 (0-0)                      |                                   |
| 2013 | Guyana        | 0 (0-0)                   |                                | 0 (0-0)                           |                                        | 0 (0-0)                    |                                 | 0 (0-0)                            |                                         | 0 (0-0)              |                           | 0 (0-0)                      |                                   |
| 2014 | Guyana        | 0 (0-0)                   |                                | 0 (0-0)                           |                                        | 0 (0-0)                    |                                 | 0 (0-0)                            |                                         | 0 (0-0)              |                           | 0 (0-0)                      |                                   |
| 2015 | Guyana        | 0 (0-0)                   | 0 (0-0)                        | 0 (0-0)                           | 0 (0-0)                                | 0 (0-0)                    | 0 (0-0)                         | 0 (0-0)                            | 0 (0-0)                                 | 0 (0-0)              | 0 (0-0)                   | 0 (0-0)                      | 0 (0-0)                           |
| 2000 | Haiti         | 934 (657-1227)            |                                | 78 (55-102)                       |                                        | 380 (94-839)               |                                 | 32 (8-53)                          |                                         | 2 (0-3)              |                           | 0 (0-0)                      |                                   |
| 2001 | Haiti         | 894 (629-1175)            |                                | 74 (52-97)                        |                                        | 366 (91-614)               |                                 | 30 (8-51)                          |                                         | 1 (0-3)              |                           | 0 (0-0)                      |                                   |
| 2002 | Haiti         | 853 (600-1121)            |                                | 71 (50-93)                        |                                        | 351 (88-587)               |                                 | 29 (7-49)                          |                                         | 1 (0-2)              |                           | 0 (0-0)                      |                                   |
| 2003 | Haiti         | 814 (572-1069)            |                                | 67 (47-89)                        |                                        | 336 (85-563)               |                                 | 28 (7-47)                          |                                         | 1 (0-2)              |                           | 0 (0-0)                      |                                   |
| 2004 | Haiti         | 781 (549-1026)            |                                | 65 (46-85)                        |                                        | 324 (82-542)               |                                 | 27 (7-45)                          |                                         | 1 (0-2)              |                           | 0 (0-0)                      |                                   |
| 2005 | Haiti         | 760 (535-999)             |                                | 63 (44-83)                        |                                        | 316 (81-529)               |                                 | 26 (7-44)                          |                                         | 1 (0-2)              |                           | 0 (0-0)                      |                                   |
| 2006 | Haiti         | 748 (526-982)             |                                | 62 (44-81)                        |                                        | 312 (80-521)               |                                 | 26 (7-43)                          |                                         | 1 (0-2)              |                           | 0 (0-0)                      |                                   |
| 2007 | Haiti         | 738 (519-970)             |                                | 61 (43-80)                        |                                        | 308 (80-514)               |                                 | 25 (7-42)                          |                                         | 1 (0-2)              |                           | 0 (0-0)                      |                                   |
| 2008 | Haiti         | 728 (512-957)             |                                | 60 (42-79)                        |                                        | 305 (79-508)               |                                 | 25 (7-42)                          |                                         | 1 (0-2)              |                           | 0 (0-0)                      |                                   |
| 2009 | Haiti         | 717 (504-942)             |                                | 59 (41-77)                        |                                        | 300 (79-499)               |                                 | 25 (6-41)                          |                                         | 1 (0-2)              |                           | 0 (0-0)                      |                                   |
| 2010 | Haiti         | 2217 (1559-2913)          |                                | 181 (127-237)                     |                                        | 928 (377-1448)             |                                 | 78 (31-118)                        |                                         | 4 (2-6)              |                           | 0 (0-0)                      |                                   |
| 2011 | Haiti         | 685 (482-900)             |                                | 56 (39-73)                        |                                        | 286 (77-475)               |                                 | 23 (6-39)                          |                                         | 1 (0-2)              |                           | 0 (0-0)                      |                                   |
| 2012 | Haiti         | 668 (470-878)             |                                | 54 (38-71)                        |                                        | 278 (75-461)               |                                 | 23 (6-37)                          |                                         | 1 (0-2)              |                           | 0 (0-0)                      |                                   |
| 2013 | Haiti         | 201 (142-265)             |                                | 16 (12-22)                        |                                        | 83 (20-142)                |                                 | 7 (2-12)                           |                                         | 1 (0-1)              |                           | 0 (0-0)                      |                                   |
| 2014 | Haiti         | 96 (68-126)               |                                | 8 (6-10)                          |                                        | 40 (10-67)                 |                                 | 3 (1-6)                            |                                         | 0 (0-1)              |                           | 0 (0-0)                      |                                   |
| 2015 | Haiti         | 80 (57-106)               | 0 (0-1)                        | 7 (5-9)                           | 0 (0-0)                                | 33 (8-56)                  | 0 (0-0)                         | 3 (1-5)                            | 0 (0-0)                                 | 0 (0-0)              | 0 (0-0)                   | 0 (0-0)                      | 0 (0-0)                           |
| 2000 | Honduras      | 33 (23-43)                |                                | 4 (2-5)                           |                                        | 10 (3-18)                  |                                 | 1 (0-2)                            |                                         | 0 (0-0)              |                           | 0 (0-0)                      |                                   |
| 2001 | Honduras      | 14 (10-19)                |                                | 2 (1-2)                           |                                        | 5 (1-8)                    |                                 | 1 (0-1)                            |                                         | 0 (0-0)              |                           | 0 (0-0)                      |                                   |
| 2002 | Honduras      | 13 (9-17)                 |                                | 1 (1-2)                           |                                        | 4 (1-7)                    |                                 | 0 (0-1)                            |                                         | 0 (0-0)              |                           | 0 (0-0)                      |                                   |
| 2003 | Honduras      | 13 (9-17)                 |                                | 1 (1-2)                           |                                        | 4 (1-7)                    |                                 | 0 (0-1)                            |                                         | 0 (0-0)              |                           | 0 (0-0)                      |                                   |
| 2004 | Honduras      | 11 (8-15)                 |                                | 1 (1-2)                           |                                        | 4 (1-6)                    |                                 | 0 (0-1)                            |                                         | 0 (0-0)              |                           | 0 (0-0)                      |                                   |
| 2005 | Honduras      | 1 (1-2)                   |                                | 0 (0-0)                           |                                        | 0 (0-1)                    |                                 | 0 (0-0)                            |                                         | 0 (0-0)              |                           | 0 (0-0)                      |                                   |
| 2006 | Honduras      | 1 (1-2)                   |                                | 0 (0-0)                           |                                        | 0 (0-1)                    |                                 | 0 (0-0)                            |                                         | 0 (0-0)              |                           | 0 (0-0)                      |                                   |
| 2007 | Honduras      | 1 (1-2)                   |                                | 0 (0-0)                           |                                        | 0 (0-1)                    |                                 | 0 (0-0)                            |                                         | 0 (0-0)              |                           | 0 (0-0)                      |                                   |
| 2008 | Honduras      | 1 (1-2)                   |                                | 0 (0-0)                           |                                        | 0 (0-1)                    |                                 | 0 (0-0)                            |                                         | 0 (0-0)              |                           | 0 (0-0)                      |                                   |
| 2009 | Honduras      | 1 (1-1)                   |                                | 0 (0-0)                           |                                        | 0 (0-0)                    |                                 | 0 (0-0)                            |                                         | 0 (0-0)              |                           | 0 (0-0)                      |                                   |
| 2010 | Honduras      | 1 (1-1)                   |                                | 0 (0-0)                           |                                        | 0 (0-1)                    |                                 | 0 (0-0)                            |                                         | 0 (0-0)              |                           | 0 (0-0)                      |                                   |
| 2011 | Honduras      | 1 (1-1)                   |                                | 0 (0-0)                           |                                        | 0 (0-1)                    |                                 | 0 (0-0)                            |                                         | 0 (0-0)              |                           | 0 (0-0)                      |                                   |
| 2012 | Honduras      | 1 (1-1)                   |                                | 0 (0-0)                           |                                        | 0 (0-1)                    |                                 | 0 (0-0)                            |                                         | 0 (0-0)              |                           | 0 (0-0)                      |                                   |
| 2013 | Honduras      | 1 (1-1)                   |                                | 0 (0-0)                           |                                        | 0 (0-1)                    |                                 | 0 (0-0)                            |                                         | 0 (0-0)              |                           | 0 (0-0)                      |                                   |
| 2014 | Honduras      | 1 (1-1)                   |                                | 0 (0-0)                           |                                        | 0 (0-0)                    |                                 | 0 (0-0)                            |                                         | 0 (0-0)              |                           | 0 (0-0)                      |                                   |
| 2015 | Honduras      | 1 (1-1)                   | 0 (0-0)                        | 0 (0-0)                           | 0 (0-0)                                | 0 (0-0)                    | 0 (0-0)                         | 0 (0-0)                            | 0 (0-0)                                 | 0 (0-0)              | 0 (0-0)                   | 0 (0-0)                      | 0 (0-0)                           |
| 2000 | Hungary       | 1 (0-1)                   |                                | 0 (0-0)                           |                                        | 0 (0-0)                    |                                 | 0 (0-0)                            |                                         | 0 (0-0)              |                           | 0 (0-0)                      |                                   |
| 2001 | Hungary       | 0 (0-0)                   |                                | 0 (0-0)                           |                                        | 0 (0-0)                    |                                 | 0 (0-0)                            |                                         | 0 (0-0)              |                           | 0 (0-0)                      |                                   |
| 2002 | Hungary       | 0 (0-0)                   |                                | 0 (0-0)                           |                                        | 0 (0-0)                    |                                 | 0 (0-0)                            |                                         | 0 (0-0)              |                           | 0 (0-0)                      |                                   |
| 2003 | Hungary       | 0 (0-0)                   |                                | 0 (0-0)                           |                                        | 0 (0-0)                    |                                 | 0 (0-0)                            |                                         | 0 (0-0)              |                           | 0 (0-0)                      |                                   |
| 2004 | Hungary       | 0 (0-0)                   |                                | 0 (0-0)                           |                                        | 0 (0-0)                    |                                 | 0 (0-0)                            |                                         | 0 (0-0)              |                           | 0 (0-0)                      |                                   |
| 2005 | Hungary       | 0 (0-0)                   |                                | 0 (0-0)                           |                                        | 0 (0-0)                    |                                 | 0 (0-0)                            |                                         | 0 (0-0)              |                           | 0 (0-0)                      |                                   |
| 2006 | Hungary       | 0 (0-0)                   |                                | 0 (0-0)                           |                                        | 0 (0-0)                    |                                 | 0 (0-0)                            |                                         | 0 (0-0)              |                           | 0 (0-0)                      |                                   |
| 2007 | Hungary       | 0 (0-0)                   |                                | 0 (0-0)                           |                                        | 0 (0-0)                    |                                 | 0 (0-0)                            |                                         | 0 (0-0)              |                           | 0 (0-0)                      |                                   |
| 2008 | Hungary       | 0 (0-0)                   |                                | 0 (0-0)                           |                                        | 0 (0-0)                    |                                 | 0 (0-0)                            |                                         | 0 (0-0)              |                           | 0 (0-0)                      |                                   |
| 2009 | Hungary       | 0 (0-0)                   |                                | 0 (0-0)                           |                                        | 0 (0-0)                    |                                 | 0 (0-0)                            |                                         | 0 (0-0)              |                           | 0 (0-0)                      |                                   |
| 2010 | Hungary       | 0 (0-0)                   |                                | 0 (0-0)                           |                                        | 0 (0-0)                    |                                 | 0 (0-0)                            |                                         | 0 (0-0)              |                           | 0 (0-0)                      |                                   |
| 2011 | Hungary       | 0 (0-0)                   |                                | 0 (0-0)                           |                                        | 0 (0-0)                    |                                 | 0 (0-0)                            |                                         | 0 (0-0)              |                           | 0 (0-0)                      |                                   |
| 2012 | Hungary       | 0 (0-0)                   |                                | 0 (0-0)                           |                                        | 0 (0-0)                    |                                 | 0 (0-0)                            |                                         | 0 (0-0)              |                           | 0 (0-0)                      |                                   |
| 2013 | Hungary       | 0 (0-0)                   |                                | 0 (0-0)                           |                                        | 0 (0-0)                    |                                 | 0 (0-0)                            |                                         | 0 (0-0)              |                           | 0 (0-0)                      |                                   |
| 2014 | Hungary       | 0 (0-0)                   |                                | 0 (0-0)                           |                                        | 0 (0-0)                    |                                 | 0 (0-0)                            |                                         | 0 (0-0)              |                           | 0 (0-0)                      |                                   |
| 2015 | Hungary       | 0 (0-0)                   | 0 (0-0)                        | 0 (0-0)                           | 0 (0-0)                                | 0 (0-0)                    | 0 (0-0)                         | 0 (0-0)                            | 0 (0-0)                                 | 0 (0-0)              | 0 (0-0)                   | 0 (0-0)                      | 0 (0-0)                           |
| 2000 | Iceland       | 0 (0-0)                   |                                | 0 (0-0)                           |                                        | 0 (0-0)                    |                                 | 0 (0-0)                            |                                         | 0 (0-0)              |                           | 0 (0-0)                      |                                   |
| 2001 | Iceland       | 0 (0-0)                   |                                | 0 (0-0)                           |                                        | 0 (0-0)                    |                                 | 0 (0-0)                            |                                         | 0 (0-0)              |                           | 0 (0-0)                      |                                   |
| 2002 | Iceland       | 0 (0-0)                   |                                | 0 (0-0)                           |                                        | 0 (0-0)                    |                                 | 0 (0-0)                            |                                         | 0 (0-0)              |                           | 0 (0-0)                      |                                   |
| 2003 | Iceland       | 0 (0-0)                   |                                | 0 (0-0)                           |                                        | 0 (0-0)                    |                                 | 0 (0-0)                            |                                         | 0 (0-0)              |                           | 0 (0-0)                      |                                   |
| 2004 | Iceland       | 0 (0-0)                   |                                | 0 (0-0)                           |                                        | 0 (0-0)                    |                                 | 0 (0-0)                            |                                         | 0 (0-0)              |                           | 0 (0-0)                      |                                   |
| 2005 | Iceland       | 0 (0-0)                   |                                | 0 (0-0)                           |                                        | 0 (0-0)                    |                                 | 0 (0-0)                            |                                         | 0 (0-0)              |                           | 0 (0-0)                      |                                   |
| 2006 | Iceland       | 0 (0-0)                   |                                | 0 (0-0)                           |                                        | 0 (0-0)                    |                                 | 0 (0-0)                            |                                         | 0 (0-0)              |                           | 0 (0-0)                      |                                   |
| 2007 | Iceland       | 0 (0-0)                   |                                | 0 (0-0)                           |                                        | 0 (0-0)                    |                                 | 0 (0-0)                            |                                         | 0 (0-0)              |                           | 0 (0-0)                      |                                   |
| 2008 | Iceland       | 0 (0-0)                   |                                | 0 (0-0)                           |                                        | 0 (0-0)                    |                                 | 0 (0-0)                            |                                         | 0 (0-0)              |                           | 0 (0-0)                      |                                   |
| 2009 | Iceland       | 0 (0-0)                   |                                | 0 (0-0)                           |                                        | 0 (0-0)                    |                                 | 0 (0-0)                            |                                         | 0 (0-0)              |                           | 0 (0-0)                      |                                   |
| 2010 | Iceland       | 0 (0-0)                   |                                | 0 (0-0)                           |                                        | 0 (0-0)                    |                                 | 0 (0-0)                            |                                         | 0 (0-0)              |                           | 0 (0-0)                      |                                   |
| 2011 | Iceland       | 0 (0-0)                   |                                | 0 (0-0)                           |                                        | 0 (0-0)                    |                                 | 0 (0-0)                            |                                         | 0 (0-0)              |                           | 0 (0-0)                      |                                   |
| 2012 | Iceland       | 0 (0-0)                   |                                | 0 (0-0)                           |                                        | 0 (0-0)                    |                                 | 0 (0-0)                            |                                         | 0 (0-0)              |                           | 0 (0-0)                      |                                   |
| 2013 | Iceland       | 0 (0-0)                   |                                | 0 (0-0)                           |                                        | 0 (0-0)                    |                                 | 0 (0-0)                            |                                         | 0 (0-0)              |                           | 0 (0-0)                      |                                   |
| 2014 | Iceland       | 0 (0-0)                   |                                | 0 (0-0)                           |                                        | 0 (0-0)                    |                                 | 0 (0-0)                            |                                         | 0 (0-0)              |                           | 0 (0-0)                      |                                   |
| 2015 | Iceland       | 0 (0-0)                   | 0 (0-0)                        | 0 (0-0)                           | 0 (0-0)                                | 0 (0-0)                    | 0 (0-0)                         | 0 (0-0)                            | 0 (0-0)                                 | 0 (0-0)              | 0 (0-0)                   | 0 (0-0)                      | 0 (0-0)                           |

Hib = *Haemophilus influenzae* type b; npnm = non-pneumonia, non-meningitis; HIV = deaths only in HIV-infected children; Uncertainty range provided in parentheses.

| Year | Country                    | Hib pneumonia deaths (UR) | Hib pneumonia deaths, HIV (UR) | Hib pneumonia mortality rate (UR) | Hib pneumonia mortality rate, HIV (UR) | Hib meningitis deaths (UR) | Hib meningitis deaths, HIV (UR) | Hib meningitis mortality rate (UR) | Hib meningitis mortality rate, HIV (UR) | Hib NPNM deaths (UR) | Hib NPNM deaths, HIV (UR) | Hib NPNM mortality rate (UR) | Hib NPNM mortality rate, HIV (UR) |
|------|----------------------------|---------------------------|--------------------------------|-----------------------------------|----------------------------------------|----------------------------|---------------------------------|------------------------------------|-----------------------------------------|----------------------|---------------------------|------------------------------|-----------------------------------|
| 2015 | Iceland                    | 0 (0-0)                   | 0 (0-0)                        | 0 (0-0)                           | 0 (0-0)                                | 0 (0-0)                    | 0 (0-0)                         | 0 (0-0)                            | 0 (0-0)                                 | 0 (0-0)              | 0 (0-0)                   | 0 (0-0)                      | 0 (0-0)                           |
| 2000 | India                      | 61391 (43178-80663)       |                                | 49 (34-64)                        |                                        | 21065 (9122-31840)         |                                 | 17 (7-25)                          |                                         | 101 (44-153)         |                           | 0 (0-0)                      | 0 (0-0)                           |
| 2001 | India                      | 58888 (41417-77375)       |                                | 47 (33-61)                        |                                        | 20207 (8707-30591)         |                                 | 16 (7-24)                          |                                         | 102 (44-155)         |                           | 0 (0-0)                      | 0 (0-0)                           |
| 2002 | India                      | 56304 (39600-73979)       |                                | 44 (31-58)                        |                                        | 19321 (8324-29251)         |                                 | 15 (7-23)                          |                                         | 97 (42-148)          |                           | 0 (0-0)                      | 0 (0-0)                           |
| 2003 | India                      | 53787 (37830-70673)       |                                | 42 (30-56)                        |                                        | 18456 (7919-27885)         |                                 | 15 (6-22)                          |                                         | 96 (41-146)          |                           | 0 (0-0)                      | 0 (0-0)                           |
| 2004 | India                      | 51137 (35966-67190)       |                                | 40 (28-53)                        |                                        | 17542 (7517-26619)         |                                 | 14 (6-21)                          |                                         | 93 (39-141)          |                           | 0 (0-0)                      | 0 (0-0)                           |
| 2005 | India                      | 48419 (34054-63619)       |                                | 38 (27-50)                        |                                        | 16602 (7163-25129)         |                                 | 13 (6-20)                          |                                         | 87 (37-133)          |                           | 0 (0-0)                      | 0 (0-0)                           |
| 2006 | India                      | 45962 (32326-60391)       |                                | 36 (25-47)                        |                                        | 15751 (6785-23841)         |                                 | 12 (5-19)                          |                                         | 90 (39-137)          |                           | 0 (0-0)                      | 0 (0-0)                           |
| 2007 | India                      | 43207 (30389-56772)       |                                | 34 (24-44)                        |                                        | 14798 (6417-22348)         |                                 | 12 (5-18)                          |                                         | 86 (37-130)          |                           | 0 (0-0)                      | 0 (0-0)                           |
| 2008 | India                      | 40558 (28525-53290)       |                                | 32 (22-42)                        |                                        | 13885 (6021-20980)         |                                 | 11 (5-16)                          |                                         | 81 (35-122)          |                           | 0 (0-0)                      | 0 (0-0)                           |
| 2009 | India                      | 37904 (26659-49804)       |                                | 30 (21-39)                        |                                        | 12973 (5588-19652)         |                                 | 10 (4-15)                          |                                         | 79 (34-120)          |                           | 0 (0-0)                      | 0 (0-0)                           |
| 2010 | India                      | 35403 (24900-46517)       |                                | 28 (20-37)                        |                                        | 12115 (5213-18364)         |                                 | 10 (4-15)                          |                                         | 74 (32-112)          |                           | 0 (0-0)                      | 0 (0-0)                           |
| 2011 | India                      | 32966 (23186-43315)       |                                | 26 (18-34)                        |                                        | 11279 (4684-17251)         |                                 | 9 (4-14)                           |                                         | 83 (34-126)          |                           | 0 (0-0)                      | 0 (0-0)                           |
| 2012 | India                      | 29787 (20950-39139)       |                                | 24 (17-31)                        |                                        | 10197 (4182-15605)         |                                 | 8 (3-13)                           |                                         | 74 (31-114)          |                           | 0 (0-0)                      | 0 (0-0)                           |
| 2013 | India                      | 25936 (18241-34078)       |                                | 21 (15-28)                        |                                        | 8887 (3593-13673)          |                                 | 7 (3-11)                           |                                         | 68 (28-105)          |                           | 0 (0-0)                      | 0 (0-0)                           |
| 2014 | India                      | 23250 (16352-30549)       |                                | 19 (13-25)                        |                                        | 7968 (3197-12263)          |                                 | 7 (3-10)                           |                                         | 61 (24-94)           |                           | 0 (0-0)                      | 0 (0-0)                           |
| 2015 | India                      | 11626 (8177-15276)        | 29 (21-39)                     | 10 (7-13)                         | 0 (0-0)                                | 3977 (1584-6136)           | 11 (4-16)                       | 3 (1-5)                            | 0 (0-0)                                 | 31 (13-48)           | 0 (0-0)                   | 0 (0-0)                      | 0 (0-0)                           |
| 2000 | Indonesia                  | 6346 (4463-8338)          |                                | 30 (21-40)                        |                                        | 1850 (633-2955)            |                                 | 9 (3-14)                           |                                         | 15 (5-24)            |                           | 0 (0-0)                      | 0 (0-0)                           |
| 2001 | Indonesia                  | 6011 (4228-7899)          |                                | 28 (20-37)                        |                                        | 1745 (602-2783)            |                                 | 8 (3-13)                           |                                         | 14 (5-22)            |                           | 0 (0-0)                      | 0 (0-0)                           |
| 2002 | Indonesia                  | 5753 (4047-7560)          |                                | 27 (19-36)                        |                                        | 1651 (573-2629)            |                                 | 8 (3-12)                           |                                         | 13 (5-21)            |                           | 0 (0-0)                      | 0 (0-0)                           |
| 2003 | Indonesia                  | 5484 (3857-7205)          |                                | 26 (18-34)                        |                                        | 1552 (539-2472)            |                                 | 7 (3-12)                           |                                         | 12 (4-20)            |                           | 0 (0-0)                      | 0 (0-0)                           |
| 2004 | Indonesia                  | 6334 (4455-8322)          |                                | 29 (21-38)                        |                                        | 1768 (622-2808)            |                                 | 8 (3-13)                           |                                         | 14 (5-22)            |                           | 0 (0-0)                      | 0 (0-0)                           |
| 2005 | Indonesia                  | 4943 (3476-6494)          |                                | 23 (16-30)                        |                                        | 1360 (485-2154)            |                                 | 6 (2-10)                           |                                         | 11 (4-17)            |                           | 0 (0-0)                      | 0 (0-0)                           |
| 2006 | Indonesia                  | 4703 (3308-6179)          |                                | 21 (15-28)                        |                                        | 1275 (461-2015)            |                                 | 6 (2-9)                            |                                         | 10 (4-16)            |                           | 0 (0-0)                      | 0 (0-0)                           |
| 2007 | Indonesia                  | 4442 (3124-5836)          |                                | 20 (14-26)                        |                                        | 1186 (435-1869)            |                                 | 5 (2-8)                            |                                         | 9 (3-15)             |                           | 0 (0-0)                      | 0 (0-0)                           |
| 2008 | Indonesia                  | 4183 (2942-5496)          |                                | 19 (13-25)                        |                                        | 1099 (411-1724)            |                                 | 5 (2-9)                            |                                         | 9 (3-14)             |                           | 0 (0-0)                      | 0 (0-0)                           |
| 2009 | Indonesia                  | 3984 (2802-5235)          |                                | 18 (13-23)                        |                                        | 1031 (394-1609)            |                                 | 5 (2-7)                            |                                         | 8 (3-13)             |                           | 0 (0-0)                      | 0 (0-0)                           |
| 2010 | Indonesia                  | 3878 (2728-5096)          |                                | 17 (12-22)                        |                                        | 988 (386-1537)             |                                 | 4 (2-7)                            |                                         | 8 (3-12)             |                           | 0 (0-0)                      | 0 (0-0)                           |
| 2011 | Indonesia                  | 3845 (2705-5052)          |                                | 17 (12-22)                        |                                        | 964 (387-1496)             |                                 | 4 (2-7)                            |                                         | 8 (3-12)             |                           | 0 (0-0)                      | 0 (0-0)                           |
| 2012 | Indonesia                  | 3857 (2713-5068)          |                                | 17 (12-22)                        |                                        | 952 (392-1476)             |                                 | 4 (2-6)                            |                                         | 8 (3-12)             |                           | 0 (0-0)                      | 0 (0-0)                           |
| 2013 | Indonesia                  | 3838 (2699-5042)          |                                | 16 (11-21)                        |                                        | 932 (169-1534)             |                                 | 4 (1-6)                            |                                         | 7 (1-12)             |                           | 0 (0-0)                      | 0 (0-0)                           |
| 2014 | Indonesia                  | 1594 (1121-2094)          |                                | 7 (5-9)                           |                                        | 383 (71-633)               |                                 | 2 (0-3)                            |                                         | 3 (1-5)              |                           | 0 (0-0)                      | 0 (0-0)                           |
| 2015 | Indonesia                  | 368 (259-483)             | 1 (1-2)                        | 2 (1-2)                           | 0 (0-0)                                | 87 (16-145)                | 0 (0-1)                         | 0 (0-1)                            | 0 (0-0)                                 | 1 (0-1)              | 0 (0-0)                   | 0 (0-0)                      | 0 (0-0)                           |
| 2000 | Iran (Islamic Republic of) | 965 (679-1268)            |                                | 15 (11-20)                        |                                        | 218 (116-317)              |                                 | 3 (2-5)                            |                                         | 2 (1-3)              |                           | 0 (0-0)                      | 0 (0-0)                           |
| 2001 | Iran (Islamic Republic of) | 874 (615-1149)            |                                | 14 (10-19)                        |                                        | 194 (101-284)              |                                 | 3 (2-5)                            |                                         | 2 (1-2)              |                           | 0 (0-0)                      | 0 (0-0)                           |
| 2002 | Iran (Islamic Republic of) | 795 (559-1045)            |                                | 14 (10-18)                        |                                        | 173 (89-258)               |                                 | 3 (2-4)                            |                                         | 1 (1-2)              |                           | 0 (0-0)                      | 0 (0-0)                           |
| 2003 | Iran (Islamic Republic of) | 715 (503-840)             |                                | 13 (9-17)                         |                                        | 152 (40-236)               |                                 | 3 (1-4)                            |                                         | 1 (0-2)              |                           | 0 (0-0)                      | 0 (0-0)                           |
| 2004 | Iran (Islamic Republic of) | 659 (463-866)             |                                | 12 (8-16)                         |                                        | 138 (34-219)               |                                 | 3 (1-4)                            |                                         | 1 (0-2)              |                           | 0 (0-0)                      | 0 (0-0)                           |
| 2005 | Iran (Islamic Republic of) | 604 (425-794)             |                                | 11 (8-15)                         |                                        | 125 (30-202)               |                                 | 2 (1-4)                            |                                         | 1 (0-2)              |                           | 0 (0-0)                      | 0 (0-0)                           |
| 2006 | Iran (Islamic Republic of) | 570 (401-749)             |                                | 10 (7-13)                         |                                        | 117 (26-192)               |                                 | 2 (0-3)                            |                                         | 1 (0-2)              |                           | 0 (0-0)                      | 0 (0-0)                           |
| 2007 | Iran (Islamic Republic of) | 545 (384-717)             |                                | 9 (7-12)                          |                                        | 112 (24-185)               |                                 | 2 (0-3)                            |                                         | 1 (0-1)              |                           | 0 (0-0)                      | 0 (0-0)                           |
| 2008 | Iran (Islamic Republic of) | 528 (371-693)             |                                | 9 (6-12)                          |                                        | 109 (22-180)               |                                 | 2 (0-3)                            |                                         | 1 (0-1)              |                           | 0 (0-0)                      | 0 (0-0)                           |
| 2009 | Iran (Islamic Republic of) | 510 (359-671)             |                                | 8 (6-11)                          |                                        | 105 (20-175)               |                                 | 2 (0-3)                            |                                         | 1 (0-1)              |                           | 0 (0-0)                      | 0 (0-0)                           |
| 2010 | Iran (Islamic Republic of) | 501 (352-658)             |                                | 8 (6-10)                          |                                        | 103 (19-173)               |                                 | 2 (0-3)                            |                                         | 1 (0-1)              |                           | 0 (0-0)                      | 0 (0-0)                           |
| 2011 | Iran (Islamic Republic of) | 483 (340-635)             |                                | 7 (5-10)                          |                                        | 99 (18-166)                |                                 | 2 (0-3)                            |                                         | 1 (0-1)              |                           | 0 (0-0)                      | 0 (0-0)                           |
| 2012 | Iran (Islamic Republic of) | 469 (330-616)             |                                | 7 (5-9)                           |                                        | 96 (18-161)                |                                 | 1 (0-2)                            |                                         | 1 (0-1)              |                           | 0 (0-0)                      | 0 (0-0)                           |
| 2013 | Iran (Islamic Republic of) | 454 (320-597)             |                                | 7 (5-9)                           |                                        | 93 (18-156)                |                                 | 1 (0-2)                            |                                         | 1 (0-1)              |                           | 0 (0-0)                      | 0 (0-0)                           |
| 2014 | Iran (Islamic Republic of) | 65 (46-85)                |                                | 1 (1-1)                           |                                        | 13 (3-22)                  |                                 | 0 (0-0)                            |                                         | 0 (0-0)              |                           | 0 (0-0)                      | 0 (0-0)                           |
| 2015 | Iran (Islamic Republic of) | 28 (20-36)                | 0 (0-0)                        | 0 (0-1)                           | 0 (0-0)                                | 6 (1-9)                    | 0 (0-0)                         | 0 (0-0)                            | 0 (0-0)                                 | 0 (0-0)              | 0 (0-0)                   | 0 (0-0)                      | 0 (0-0)                           |
| 2000 | Iraq                       | 807 (567-1060)            |                                | 21 (15-28)                        |                                        | 186 (77-285)               |                                 | 5 (2-8)                            |                                         | 1 (1-2)              |                           | 0 (0-0)                      | 0 (0-0)                           |
| 2001 | Iraq                       | 801 (563-1052)            |                                | 21 (15-27)                        |                                        | 184 (77-282)               |                                 | 5 (2-7)                            |                                         | 1 (1-2)              |                           | 0 (0-0)                      | 0 (0-0)                           |
| 2002 | Iraq                       | 791 (556-1039)            |                                | 20 (14-26)                        |                                        | 184 (78-280)               |                                 | 5 (2-7)                            |                                         | 1 (1-2)              |                           | 0 (0-0)                      | 0 (0-0)                           |
| 2003 | Iraq                       | 784 (551-1030)            |                                | 20 (14-26)                        |                                        | 184 (79-279)               |                                 | 5 (2-7)                            |                                         | 1 (1-2)              |                           | 0 (0-0)                      | 0 (0-0)                           |
| 2004 | Iraq                       | 780 (549-1025)            |                                | 19 (13-25)                        |                                        | 181 (79-274)               |                                 | 4 (2-7)                            |                                         | 1 (1-2)              |                           | 0 (0-0)                      | 0 (0-0)                           |
| 2005 | Iraq                       | 785 (552-1032)            |                                | 19 (13-25)                        |                                        | 180 (79-271)               |                                 | 4 (2-7)                            |                                         | 1 (1-2)              |                           | 0 (0-0)                      | 0 (0-0)                           |
| 2006 | Iraq                       | 788 (554-1035)            |                                | 19 (13-24)                        |                                        | 178 (79-267)               |                                 | 4 (2-6)                            |                                         | 1 (1-2)              |                           | 0 (0-0)                      | 0 (0-0)                           |
| 2007 | Iraq                       | 803 (565-1055)            |                                | 18 (13-24)                        |                                        | 180 (79-271)               |                                 | 4 (2-6)                            |                                         | 1 (1-2)              |                           | 0 (0-0)                      | 0 (0-0)                           |
| 2008 | Iraq                       | 822 (578-1080)            |                                | 18 (13-24)                        |                                        | 183 (79-278)               |                                 | 4 (2-6)                            |                                         | 1 (1-2)              |                           | 0 (0-0)                      | 0 (0-0)                           |
| 2009 | Iraq                       | 840 (591-1103)            |                                | 18 (13-23)                        |                                        | 186 (78-284)               |                                 | 4 (2-6)                            |                                         | 1 (1-2)              |                           | 0 (0-0)                      | 0 (0-0)                           |
| 2010 | Iraq                       | 851 (598-1118)            |                                | 17 (12-23)                        |                                        | 187 (77-287)               |                                 | 4 (2-6)                            |                                         | 1 (1-2)              |                           | 0 (0-0)                      | 0 (0-0)                           |
| 2011 | Iraq                       | 842 (592-1107)            |                                | 17 (12-22)                        |                                        | 183 (74-282)               |                                 | 4 (1-6)                            |                                         | 1 (1-2)              |                           | 0 (0-0)                      | 0 (0-0)                           |
| 2012 | Iraq                       | 594 (418-781)             |                                | 11 (8-15)                         |                                        | 127 (50-197)               |                                 | 2 (1-4)                            |                                         | 1 (0-2)              |                           | 0 (0-0)                      | 0 (0-0)                           |
| 2013 | Iraq                       | 101 (71-132)              |                                | 2 (1-2)                           |                                        | 21 (8-33)                  |                                 | 0 (0-1)                            |                                         | 0 (0-0)              |                           | 0 (0-0)                      | 0 (0-0)                           |
| 2014 | Iraq                       | 104 (73-137)              |                                | 2 (1-2)                           |                                        | 22 (8-34)                  |                                 | 0 (0-1)                            |                                         | 0 (0-0)              |                           | 0 (0-0)                      | 0 (0-0)                           |
| 2015 | Iraq                       | 113 (79-148)              | 0 (0-0)                        | 2 (1-3)                           | 0 (0-0)                                | 24 (8-37)                  | 0 (0-0)                         | 0 (0-1)                            | 0 (0-0)                                 | 0 (0-0)              | 0 (0-0)                   | 0 (0-0)                      | 0 (0-0)                           |
| 2000 | Ireland                    | 0 (0-0)                   |                                | 0 (0-0)                           |                                        | 1 (0-1)                    |                                 | 0 (0-0)                            |                                         | 0 (0-0)              |                           | 0 (0-0)                      | 0 (0-0)                           |
| 2001 | Ireland                    | 0 (0-0)                   |                                | 0 (0-0)                           |                                        | 0 (0-1)                    |                                 | 0 (0-0)                            |                                         | 0 (0-0)              |                           | 0 (0-0)                      | 0 (0-0)                           |
| 2002 | Ireland                    | 0 (0-0)                   |                                | 0 (0-0)                           |                                        | 0 (0-0)                    |                                 | 0 (0-0)                            |                                         | 0 (0-0)              |                           | 0 (0-0)                      | 0 (0-0)                           |
| 2003 | Ireland                    | 0 (0-0)                   |                                | 0 (0-0)                           |                                        | 0 (0-0)                    |                                 | 0 (0-0)                            |                                         | 0 (0-0)              |                           | 0 (0-0)                      | 0 (0-0)                           |
| 2004 | Ireland                    | 0 (0-0)                   |                                | 0 (0-0)                           |                                        | 0 (0-0)                    |                                 | 0 (0-0)                            |                                         | 0 (0-0)              |                           | 0 (0-0)                      | 0 (0-0)                           |
| 2005 | Ireland                    | 0 (0-0)                   |                                | 0 (0-0)                           |                                        | 0 (0-0)                    |                                 | 0 (0-0)                            |                                         | 0 (0-0)              |                           | 0 (0-0)                      | 0 (0-0)                           |
| 2006 | Ireland                    | 0 (0-0)                   |                                | 0 (0-0)                           |                                        | 0 (0-0)                    |                                 | 0 (0-0)                            |                                         | 0 (0-0)              |                           | 0 (0-0)                      | 0 (0-0)                           |
| 2007 | Ireland                    | 0 (0-0)                   |                                | 0 (0-0)                           |                                        | 0 (0-0)                    |                                 | 0 (0-0)                            |                                         | 0 (0-0)              |                           | 0 (0-0)                      | 0 (0-0)                           |
| 2008 | Ireland                    | 0 (0-0)                   |                                | 0 (0-0)                           |                                        | 0 (0-0)                    |                                 | 0 (0-0)                            |                                         | 0 (0-0)              |                           | 0 (0-0)                      | 0 (0-0)                           |
| 2009 | Ireland                    | 0 (0-0)                   |                                | 0 (0-0)                           |                                        | 0 (0-0)                    |                                 | 0 (0-0)                            |                                         | 0 (0-0)              |                           | 0 (0-0)                      | 0 (0-0)                           |
| 2010 | Ireland                    | 0 (0-0)                   |                                | 0 (0-0)                           |                                        | 0 (0-0)                    |                                 | 0 (0-0)                            |                                         | 0 (0-0)              |                           | 0 (0-0)                      | 0 (0-0)                           |
| 2011 | Ireland                    | 0 (0-0)                   |                                | 0 (0-0)                           |                                        | 0 (0-0)                    |                                 | 0 (0-0)                            |                                         | 0 (0-0)              |                           | 0 (0-0)                      | 0 (0-0)                           |
| 2012 | Ireland                    | 0 (0-0)                   |                                | 0 (0-0)                           |                                        | 0 (0-0)                    |                                 | 0 (0-0)                            |                                         | 0 (0-0)              |                           | 0 (0-0)                      | 0 (0-0)                           |
| 2013 | Ireland                    | 0 (0-0)                   |                                | 0 (0-0)                           |                                        | 0 (0-0)                    |                                 | 0 (0-0)                            |                                         | 0 (0-0)              |                           | 0 (0-0)                      | 0 (0-0)                           |
| 2014 | Ireland                    | 0 (0-0)                   |                                | 0 (0-0)                           |                                        | 0 (0-0)                    |                                 | 0 (0-0)                            |                                         | 0 (0-0)              |                           | 0 (0-0)                      | 0 (0-0)                           |
| 2015 | Ireland                    | 0 (0-0)                   | 0 (0-0)                        | 0 (0-0)                           | 0 (0-0)                                | 0 (0-0)                    | 0 (0-0)                         | 0 (0-0)                            | 0 (0-0)                                 | 0 (0-0)              | 0 (0-0)                   | 0 (0-0)                      | 0 (0-0)                           |
| 2000 | Israel                     | 0 (0-0)                   |                                | 0 (0-0)                           |                                        | 0 (0-0)                    |                                 | 0 (0-0)                            |                                         | 0 (0-0)              |                           | 0 (0-0)                      | 0 (0-0)                           |
| 2001 | Israel                     | 0 (0-0)                   |                                | 0 (0-0)                           |                                        | 0 (0-0)                    |                                 | 0 (0-0)                            |                                         | 0 (0-0)              |                           | 0 (0-0)                      | 0 (0-0)                           |
| 2002 | Israel                     | 0 (0-0)                   |                                | 0 (0-0)                           |                                        | 0 (0-0)                    |                                 | 0 (0-0)                            |                                         | 0 (0-0)              |                           | 0 (0-0)                      | 0 (0-0)                           |
| 2003 | Israel                     | 0 (0-0)                   |                                | 0 (0-0)                           |                                        | 0 (0-0)                    |                                 | 0 (0-0)                            |                                         | 0 (0-0)              |                           |                              |                                   |

| Year | Country    | Hib pneumonia deaths<br>(UR) | Hib pneumonia deaths,<br>HIV (UR) | Hib pneumonia<br>mortality rate (UR) | Hib pneumonia<br>mortality rate, HIV (UR) | Hib meningitis deaths<br>(UR) | Hib meningitis deaths,<br>HIV (UR) | Hib meningitis mortality<br>rate (UR) | Hib meningitis mortality<br>rate, HIV (UR) | Hib NPNM deaths (UR) | Hib NPNM deaths, HIV<br>(UR) | Hib NPNM mortality rate<br>(UR) | Hib NPNM mortality<br>rate, HIV (UR) |
|------|------------|------------------------------|-----------------------------------|--------------------------------------|-------------------------------------------|-------------------------------|------------------------------------|---------------------------------------|--------------------------------------------|----------------------|------------------------------|---------------------------------|--------------------------------------|
| 2007 | Israel     | 0 (0-0)                      |                                   | 0 (0-0)                              | 0 (0-0)                                   | 0 (0-0)                       |                                    | 0 (0-0)                               | 0 (0-0)                                    | 0 (0-0)              |                              | 0 (0-0)                         | 0 (0-0)                              |
| 2008 | Israel     | 0 (0-0)                      |                                   | 0 (0-0)                              | 0 (0-0)                                   | 0 (0-0)                       |                                    | 0 (0-0)                               | 0 (0-0)                                    | 0 (0-0)              |                              | 0 (0-0)                         | 0 (0-0)                              |
| 2009 | Israel     | 0 (0-0)                      |                                   | 0 (0-0)                              | 0 (0-0)                                   | 0 (0-0)                       |                                    | 0 (0-0)                               | 0 (0-0)                                    | 0 (0-0)              |                              | 0 (0-0)                         | 0 (0-0)                              |
| 2010 | Israel     | 0 (0-0)                      |                                   | 0 (0-0)                              | 0 (0-0)                                   | 0 (0-0)                       |                                    | 0 (0-0)                               | 0 (0-0)                                    | 0 (0-0)              |                              | 0 (0-0)                         | 0 (0-0)                              |
| 2011 | Israel     | 0 (0-0)                      |                                   | 0 (0-0)                              | 0 (0-0)                                   | 0 (0-0)                       |                                    | 0 (0-0)                               | 0 (0-0)                                    | 0 (0-0)              |                              | 0 (0-0)                         | 0 (0-0)                              |
| 2012 | Israel     | 0 (0-0)                      |                                   | 0 (0-0)                              | 0 (0-0)                                   | 0 (0-0)                       |                                    | 0 (0-0)                               | 0 (0-0)                                    | 0 (0-0)              |                              | 0 (0-0)                         | 0 (0-0)                              |
| 2013 | Israel     | 0 (0-0)                      |                                   | 0 (0-0)                              | 0 (0-0)                                   | 0 (0-0)                       |                                    | 0 (0-0)                               | 0 (0-0)                                    | 0 (0-0)              |                              | 0 (0-0)                         | 0 (0-0)                              |
| 2014 | Israel     | 0 (0-0)                      |                                   | 0 (0-0)                              | 0 (0-0)                                   | 0 (0-0)                       |                                    | 0 (0-0)                               | 0 (0-0)                                    | 0 (0-0)              |                              | 0 (0-0)                         | 0 (0-0)                              |
| 2015 | Israel     | 0 (0-0)                      | 0 (0-0)                           | 0 (0-0)                              | 0 (0-0)                                   | 0 (0-0)                       | 0 (0-0)                            | 0 (0-0)                               | 0 (0-0)                                    | 0 (0-0)              | 0 (0-0)                      | 0 (0-0)                         | 0 (0-0)                              |
| 2000 | Italy      | 4 (3-5)                      |                                   | 0 (0-0)                              | 0 (0-0)                                   | 2 (1-3)                       |                                    | 0 (0-0)                               | 0 (0-0)                                    | 0 (0-0)              |                              | 0 (0-0)                         | 0 (0-0)                              |
| 2001 | Italy      | 1 (1-1)                      |                                   | 0 (0-0)                              | 0 (0-0)                                   | 1 (0-1)                       |                                    | 0 (0-0)                               | 0 (0-0)                                    | 0 (0-0)              |                              | 0 (0-0)                         | 0 (0-0)                              |
| 2002 | Italy      | 1 (1-1)                      |                                   | 0 (0-0)                              | 0 (0-0)                                   | 0 (0-1)                       |                                    | 0 (0-0)                               | 0 (0-0)                                    | 0 (0-0)              |                              | 0 (0-0)                         | 0 (0-0)                              |
| 2003 | Italy      | 0 (0-1)                      |                                   | 0 (0-0)                              | 0 (0-0)                                   | 1 (0-1)                       |                                    | 0 (0-0)                               | 0 (0-0)                                    | 0 (0-0)              |                              | 0 (0-0)                         | 0 (0-0)                              |
| 2004 | Italy      | 0 (0-1)                      |                                   | 0 (0-0)                              | 0 (0-0)                                   | 0 (0-1)                       |                                    | 0 (0-0)                               | 0 (0-0)                                    | 0 (0-0)              |                              | 0 (0-0)                         | 0 (0-0)                              |
| 2005 | Italy      | 0 (0-0)                      |                                   | 0 (0-0)                              | 0 (0-0)                                   | 0 (0-0)                       |                                    | 0 (0-0)                               | 0 (0-0)                                    | 0 (0-0)              |                              | 0 (0-0)                         | 0 (0-0)                              |
| 2006 | Italy      | 0 (0-0)                      |                                   | 0 (0-0)                              | 0 (0-0)                                   | 0 (0-0)                       |                                    | 0 (0-0)                               | 0 (0-0)                                    | 0 (0-0)              |                              | 0 (0-0)                         | 0 (0-0)                              |
| 2007 | Italy      | 0 (0-0)                      |                                   | 0 (0-0)                              | 0 (0-0)                                   | 0 (0-0)                       |                                    | 0 (0-0)                               | 0 (0-0)                                    | 0 (0-0)              |                              | 0 (0-0)                         | 0 (0-0)                              |
| 2008 | Italy      | 0 (0-0)                      |                                   | 0 (0-0)                              | 0 (0-0)                                   | 0 (0-0)                       |                                    | 0 (0-0)                               | 0 (0-0)                                    | 0 (0-0)              |                              | 0 (0-0)                         | 0 (0-0)                              |
| 2009 | Italy      | 0 (0-0)                      |                                   | 0 (0-0)                              | 0 (0-0)                                   | 0 (0-0)                       |                                    | 0 (0-0)                               | 0 (0-0)                                    | 0 (0-0)              |                              | 0 (0-0)                         | 0 (0-0)                              |
| 2010 | Italy      | 0 (0-0)                      |                                   | 0 (0-0)                              | 0 (0-0)                                   | 0 (0-0)                       |                                    | 0 (0-0)                               | 0 (0-0)                                    | 0 (0-0)              |                              | 0 (0-0)                         | 0 (0-0)                              |
| 2011 | Italy      | 0 (0-0)                      |                                   | 0 (0-0)                              | 0 (0-0)                                   | 0 (0-0)                       |                                    | 0 (0-0)                               | 0 (0-0)                                    | 0 (0-0)              |                              | 0 (0-0)                         | 0 (0-0)                              |
| 2012 | Italy      | 0 (0-0)                      |                                   | 0 (0-0)                              | 0 (0-0)                                   | 0 (0-0)                       |                                    | 0 (0-0)                               | 0 (0-0)                                    | 0 (0-0)              |                              | 0 (0-0)                         | 0 (0-0)                              |
| 2013 | Italy      | 0 (0-0)                      |                                   | 0 (0-0)                              | 0 (0-0)                                   | 0 (0-0)                       |                                    | 0 (0-0)                               | 0 (0-0)                                    | 0 (0-0)              |                              | 0 (0-0)                         | 0 (0-0)                              |
| 2014 | Italy      | 0 (0-0)                      |                                   | 0 (0-0)                              | 0 (0-0)                                   | 0 (0-0)                       |                                    | 0 (0-0)                               | 0 (0-0)                                    | 0 (0-0)              |                              | 0 (0-0)                         | 0 (0-0)                              |
| 2015 | Italy      | 0 (0-0)                      | 0 (0-0)                           | 0 (0-0)                              | 0 (0-0)                                   | 0 (0-0)                       | 0 (0-0)                            | 0 (0-0)                               | 0 (0-0)                                    | 0 (0-0)              | 0 (0-0)                      | 0 (0-0)                         | 0 (0-0)                              |
| 2000 | Jamaica    | 5 (4-7)                      |                                   | 2 (1-2)                              | 0 (0-0)                                   | 2 (0-3)                       |                                    | 1 (0-1)                               | 0 (0-0)                                    | 0 (0-0)              |                              | 0 (0-0)                         | 0 (0-0)                              |
| 2001 | Jamaica    | 5 (3-6)                      |                                   | 2 (1-2)                              | 0 (0-0)                                   | 1 (0-2)                       |                                    | 0 (0-1)                               | 0 (0-0)                                    | 0 (0-0)              |                              | 0 (0-0)                         | 0 (0-0)                              |
| 2002 | Jamaica    | 5 (3-6)                      |                                   | 2 (1-2)                              | 0 (0-0)                                   | 1 (0-2)                       |                                    | 0 (0-1)                               | 0 (0-0)                                    | 0 (0-0)              |                              | 0 (0-0)                         | 0 (0-0)                              |
| 2003 | Jamaica    | 3 (2-4)                      |                                   | 1 (1-2)                              | 0 (0-0)                                   | 1 (0-2)                       |                                    | 0 (0-1)                               | 0 (0-0)                                    | 0 (0-0)              |                              | 0 (0-0)                         | 0 (0-0)                              |
| 2004 | Jamaica    | 0 (0-0)                      |                                   | 0 (0-0)                              | 0 (0-0)                                   | 0 (0-0)                       |                                    | 0 (0-0)                               | 0 (0-0)                                    | 0 (0-0)              |                              | 0 (0-0)                         | 0 (0-0)                              |
| 2005 | Jamaica    | 0 (0-0)                      |                                   | 0 (0-0)                              | 0 (0-0)                                   | 0 (0-0)                       |                                    | 0 (0-0)                               | 0 (0-0)                                    | 0 (0-0)              |                              | 0 (0-0)                         | 0 (0-0)                              |
| 2006 | Jamaica    | 0 (0-1)                      |                                   | 0 (0-0)                              | 0 (0-0)                                   | 0 (0-0)                       |                                    | 0 (0-0)                               | 0 (0-0)                                    | 0 (0-0)              |                              | 0 (0-0)                         | 0 (0-0)                              |
| 2007 | Jamaica    | 1 (0-1)                      |                                   | 0 (0-0)                              | 0 (0-0)                                   | 0 (0-0)                       |                                    | 0 (0-0)                               | 0 (0-0)                                    | 0 (0-0)              |                              | 0 (0-0)                         | 0 (0-0)                              |
| 2008 | Jamaica    | 0 (0-0)                      |                                   | 0 (0-0)                              | 0 (0-0)                                   | 0 (0-0)                       |                                    | 0 (0-0)                               | 0 (0-0)                                    | 0 (0-0)              |                              | 0 (0-0)                         | 0 (0-0)                              |
| 2009 | Jamaica    | 0 (0-0)                      |                                   | 0 (0-0)                              | 0 (0-0)                                   | 0 (0-0)                       |                                    | 0 (0-0)                               | 0 (0-0)                                    | 0 (0-0)              |                              | 0 (0-0)                         | 0 (0-0)                              |
| 2010 | Jamaica    | 0 (0-0)                      |                                   | 0 (0-0)                              | 0 (0-0)                                   | 0 (0-0)                       |                                    | 0 (0-0)                               | 0 (0-0)                                    | 0 (0-0)              |                              | 0 (0-0)                         | 0 (0-0)                              |
| 2011 | Jamaica    | 0 (0-0)                      |                                   | 0 (0-0)                              | 0 (0-0)                                   | 0 (0-0)                       |                                    | 0 (0-0)                               | 0 (0-0)                                    | 0 (0-0)              |                              | 0 (0-0)                         | 0 (0-0)                              |
| 2012 | Jamaica    | 0 (0-0)                      |                                   | 0 (0-0)                              | 0 (0-0)                                   | 0 (0-0)                       |                                    | 0 (0-0)                               | 0 (0-0)                                    | 0 (0-0)              |                              | 0 (0-0)                         | 0 (0-0)                              |
| 2013 | Jamaica    | 0 (0-0)                      |                                   | 0 (0-0)                              | 0 (0-0)                                   | 0 (0-0)                       |                                    | 0 (0-0)                               | 0 (0-0)                                    | 0 (0-0)              |                              | 0 (0-0)                         | 0 (0-0)                              |
| 2014 | Jamaica    | 0 (0-0)                      |                                   | 0 (0-0)                              | 0 (0-0)                                   | 0 (0-0)                       |                                    | 0 (0-0)                               | 0 (0-0)                                    | 0 (0-0)              |                              | 0 (0-0)                         | 0 (0-0)                              |
| 2015 | Jamaica    | 0 (0-0)                      | 0 (0-0)                           | 0 (0-0)                              | 0 (0-0)                                   | 0 (0-0)                       | 0 (0-0)                            | 0 (0-0)                               | 0 (0-0)                                    | 0 (0-0)              | 0 (0-0)                      | 0 (0-0)                         | 0 (0-0)                              |
| 2000 | Japan      | 55 (39-72)                   |                                   | 1 (1-1)                              | 0 (0-0)                                   | 13 (6-21)                     |                                    | 0 (0-0)                               | 0 (0-0)                                    | 0 (0-0)              |                              | 0 (0-0)                         | 0 (0-0)                              |
| 2001 | Japan      | 43 (30-56)                   |                                   | 1 (1-1)                              | 0 (0-0)                                   | 11 (6-19)                     |                                    | 0 (0-0)                               | 0 (0-0)                                    | 0 (0-0)              |                              | 0 (0-0)                         | 0 (0-0)                              |
| 2002 | Japan      | 47 (33-61)                   |                                   | 1 (1-1)                              | 0 (0-0)                                   | 9 (4-14)                      |                                    | 0 (0-0)                               | 0 (0-0)                                    | 0 (0-0)              |                              | 0 (0-0)                         | 0 (0-0)                              |
| 2003 | Japan      | 47 (33-62)                   |                                   | 1 (1-1)                              | 0 (0-0)                                   | 10 (5-17)                     |                                    | 0 (0-0)                               | 0 (0-0)                                    | 0 (0-0)              |                              | 0 (0-0)                         | 0 (0-0)                              |
| 2004 | Japan      | 39 (28-52)                   |                                   | 1 (0-1)                              | 0 (0-0)                                   | 8 (4-13)                      |                                    | 0 (0-0)                               | 0 (0-0)                                    | 0 (0-0)              |                              | 0 (0-0)                         | 0 (0-0)                              |
| 2005 | Japan      | 43 (30-56)                   |                                   | 1 (1-1)                              | 0 (0-0)                                   | 9 (4-15)                      |                                    | 0 (0-0)                               | 0 (0-0)                                    | 0 (0-0)              |                              | 0 (0-0)                         | 0 (0-0)                              |
| 2006 | Japan      | 38 (26-49)                   |                                   | 1 (0-1)                              | 0 (0-0)                                   | 7 (3-11)                      |                                    | 0 (0-0)                               | 0 (0-0)                                    | 0 (0-0)              |                              | 0 (0-0)                         | 0 (0-0)                              |
| 2007 | Japan      | 39 (28-52)                   |                                   | 1 (1-1)                              | 0 (0-0)                                   | 9 (4-15)                      |                                    | 0 (0-0)                               | 0 (0-0)                                    | 0 (0-0)              |                              | 0 (0-0)                         | 0 (0-0)                              |
| 2008 | Japan      | 41 (29-54)                   |                                   | 1 (1-1)                              | 0 (0-0)                                   | 5 (3-8)                       |                                    | 0 (0-0)                               | 0 (0-0)                                    | 0 (0-0)              |                              | 0 (0-0)                         | 0 (0-0)                              |
| 2009 | Japan      | 31 (21-40)                   |                                   | 1 (0-1)                              | 0 (0-0)                                   | 7 (3-11)                      |                                    | 0 (0-0)                               | 0 (0-0)                                    | 0 (0-0)              |                              | 0 (0-0)                         | 0 (0-0)                              |
| 2010 | Japan      | 36 (25-47)                   |                                   | 1 (0-1)                              | 0 (0-0)                                   | 9 (5-16)                      |                                    | 0 (0-0)                               | 0 (0-0)                                    | 0 (0-0)              |                              | 0 (0-0)                         | 0 (0-0)                              |
| 2011 | Japan      | 33 (23-43)                   |                                   | 1 (0-1)                              | 0 (0-0)                                   | 4 (2-7)                       |                                    | 0 (0-0)                               | 0 (0-0)                                    | 0 (0-0)              |                              | 0 (0-0)                         | 0 (0-0)                              |
| 2012 | Japan      | 32 (23-43)                   |                                   | 1 (0-1)                              | 0 (0-0)                                   | 3 (2-5)                       |                                    | 0 (0-0)                               | 0 (0-0)                                    | 0 (0-0)              |                              | 0 (0-0)                         | 0 (0-0)                              |
| 2013 | Japan      | 29 (21-38)                   |                                   | 1 (0-1)                              | 0 (0-0)                                   | 3 (2-6)                       |                                    | 0 (0-0)                               | 0 (0-0)                                    | 0 (0-0)              |                              | 0 (0-0)                         | 0 (0-0)                              |
| 2014 | Japan      | 29 (20-38)                   |                                   | 1 (0-1)                              | 0 (0-0)                                   | 3 (2-5)                       |                                    | 0 (0-0)                               | 0 (0-0)                                    | 0 (0-0)              |                              | 0 (0-0)                         | 0 (0-0)                              |
| 2015 | Japan      | 6 (4-8)                      | 0 (0-0)                           | 0 (0-0)                              | 0 (0-0)                                   | 1 (0-1)                       | 0 (0-0)                            | 0 (0-0)                               | 0 (0-0)                                    | 0 (0-0)              | 0 (0-0)                      | 0 (0-0)                         | 0 (0-0)                              |
| 2000 | Jordan     | 63 (44-83)                   |                                   | 9 (6-12)                             | 0 (0-0)                                   | 10 (2-16)                     |                                    | 1 (0-2)                               | 0 (0-0)                                    | 0 (0-0)              |                              | 0 (0-0)                         | 0 (0-0)                              |
| 2001 | Jordan     | 26 (19-35)                   |                                   | 4 (3-5)                              | 0 (0-0)                                   | 6 (1-10)                      |                                    | 1 (0-1)                               | 0 (0-0)                                    | 0 (0-0)              |                              | 0 (0-0)                         | 0 (0-0)                              |
| 2002 | Jordan     | 5 (3-6)                      |                                   | 1 (0-1)                              | 0 (0-0)                                   | 1 (0-2)                       |                                    | 0 (0-0)                               | 0 (0-0)                                    | 0 (0-0)              |                              | 0 (0-0)                         | 0 (0-0)                              |
| 2003 | Jordan     | 4 (3-6)                      |                                   | 1 (0-1)                              | 0 (0-0)                                   | 1 (0-2)                       |                                    | 0 (0-0)                               | 0 (0-0)                                    | 0 (0-0)              |                              | 0 (0-0)                         | 0 (0-0)                              |
| 2004 | Jordan     | 4 (3-6)                      |                                   | 1 (0-1)                              | 0 (0-0)                                   | 1 (0-2)                       |                                    | 0 (0-0)                               | 0 (0-0)                                    | 0 (0-0)              |                              | 0 (0-0)                         | 0 (0-0)                              |
| 2005 | Jordan     | 4 (3-5)                      |                                   | 1 (0-1)                              | 0 (0-0)                                   | 1 (0-2)                       |                                    | 0 (0-0)                               | 0 (0-0)                                    | 0 (0-0)              |                              | 0 (0-0)                         | 0 (0-0)                              |
| 2006 | Jordan     | 1 (0-1)                      |                                   | 0 (0-0)                              | 0 (0-0)                                   | 0 (0-0)                       |                                    | 0 (0-0)                               | 0 (0-0)                                    | 0 (0-0)              |                              | 0 (0-0)                         | 0 (0-0)                              |
| 2007 | Jordan     | 1 (0-1)                      |                                   | 0 (0-0)                              | 0 (0-0)                                   | 0 (0-0)                       |                                    | 0 (0-0)                               | 0 (0-0)                                    | 0 (0-0)              |                              | 0 (0-0)                         | 0 (0-0)                              |
| 2008 | Jordan     | 1 (0-1)                      |                                   | 0 (0-0)                              | 0 (0-0)                                   | 0 (0-0)                       |                                    | 0 (0-0)                               | 0 (0-0)                                    | 0 (0-0)              |                              | 0 (0-0)                         | 0 (0-0)                              |
| 2009 | Jordan     | 1 (0-1)                      |                                   | 0 (0-0)                              | 0 (0-0)                                   | 0 (0-0)                       |                                    | 0 (0-0)                               | 0 (0-0)                                    | 0 (0-0)              |                              | 0 (0-0)                         | 0 (0-0)                              |
| 2010 | Jordan     | 1 (0-1)                      |                                   | 0 (0-0)                              | 0 (0-0)                                   | 0 (0-0)                       |                                    | 0 (0-0)                               | 0 (0-0)                                    | 0 (0-0)              |                              | 0 (0-0)                         | 0 (0-0)                              |
| 2011 | Jordan     | 1 (0-1)                      |                                   | 0 (0-0)                              | 0 (0-0)                                   | 0 (0-0)                       |                                    | 0 (0-0)                               | 0 (0-0)                                    | 0 (0-0)              |                              | 0 (0-0)                         | 0 (0-0)                              |
| 2012 | Jordan     | 1 (0-1)                      |                                   | 0 (0-0)                              | 0 (0-0)                                   | 0 (0-0)                       |                                    | 0 (0-0)                               | 0 (0-0)                                    | 0 (0-0)              |                              | 0 (0-0)                         | 0 (0-0)                              |
| 2013 | Jordan     | 1 (0-1)                      |                                   | 0 (0-0)                              | 0 (0-0)                                   | 0 (0-0)                       |                                    | 0 (0-0)                               | 0 (0-0)                                    | 0 (0-0)              |                              | 0 (0-0)                         | 0 (0-0)                              |
| 2014 | Jordan     | 1 (0-1)                      |                                   | 0 (0-0)                              | 0 (0-0)                                   | 0 (0-0)                       |                                    | 0 (0-0)                               | 0 (0-0)                                    | 0 (0-0)              |                              | 0 (0-0)                         | 0 (0-0)                              |
| 2015 | Jordan     | 1 (0-1)                      | 0 (0-0)                           | 0 (0-0)                              | 0 (0-0)                                   | 0 (0-0)                       | 0 (0-0)                            | 0 (0-0)                               | 0 (0-0)                                    | 0 (0-0)              | 0 (0-0)                      | 0 (0-0)                         | 0 (0-0)                              |
| 2000 | Kazakhstan | 265 (187-349)                |                                   | 24 (17-32)                           | 0 (0-0)                                   | 65 (24-102)                   |                                    | 6 (2-9)                               | 0 (0-0)                                    | 1 (0-1)              |                              | 0 (0-0)                         | 0 (0-0)                              |
| 2001 | Kazakhstan | 254 (178-333)                |                                   | 24 (17-31)                           | 0 (0-0)                                   | 60 (22-95)                    |                                    | 6 (2-9)                               | 0 (0-0)                                    | 0 (0-1)              |                              | 0 (0-0)                         | 0 (0-0)                              |
| 2002 | Kazakhstan | 251 (177-330)                |                                   | 23 (16-31)                           | 0 (0-0)                                   | 58 (22-91)                    |                                    | 5 (2-8)                               | 0 (0-0)                                    | 0 (0-1)              |                              | 0 (0-0)                         | 0 (0-0)                              |
| 2003 | Kazakhstan | 250 (175-328)                |                                   | 22 (16-29)                           | 0 (0-0)                                   | 57 (21-89)                    |                                    | 5 (2-8)                               | 0 (0-0)                                    | 0 (0-1)              |                              | 0 (0-0)                         | 0 (0-0)                              |
| 2004 | Kazakhstan | 247 (174-325)                |                                   | 21 (15-28)                           | 0 (0-0)                                   | 55 (21-86)                    |                                    | 5 (2-7)                               | 0 (0-0)                                    | 0 (0-1)              |                              | 0 (0-0)                         | 0 (0-0)                              |
| 2005 | Kazakhstan | 249 (175-327)                |                                   | 20 (14-27)                           | 0 (0-0)                                   | 54 (21-85)                    |                                    | 4 (2-7)                               | 0 (0-0)                                    | 0 (0-1)              |                              | 0 (0-0)                         | 0 (0-0)                              |
| 2006 | Kazakhstan | 248 (175-326)                |                                   | 19 (13-25)                           | 0 (0-0)                                   | 53 (21-83)                    |                                    | 4 (2-6)                               | 0 (0-0)                                    | 0 (0-1)              |                              | 0 (0-0)                         | 0 (0-0)                              |
| 2007 | Kazakhstan | 242 (171-319)                |                                   | 18 (12-23)                           | 0 (0-0)                                   | 50 (9-84)                     |                                    | 4 (1-6)                               | 0 (0-0)                                    | 0 (0-1)              |                              | 0 (0-0)                         | 0 (0-0)                              |
| 2008 | Kazakhstan | 129 (91-170)                 |                                   | 9 (6-12)                             | 0 (0-0)                                   | 26 (5-44)                     |                                    | 2 (0-3)                               | 0 (0-0)                                    | 0 (0-0)              |                              | 0 (0-0)                         | 0 (0-0)                              |
| 2009 | Kazakhstan | 16 (11-21)                   |                                   | 1 (1-1)                              | 0 (0-0)                                   | 3 (1-5)                       |                                    | 0 (0-0)                               | 0 (0-0)                                    | 0 (0-0)              |                              | 0 (0-0)                         | 0 (0-0)                              |
| 2010 | Kazakhstan | 15 (11-20)                   |                                   | 1 (1-1)                              | 0 (0-0)                                   | 3 (1-5)                       |                                    | 0 (0-0)                               | 0 (0-0)                                    | 0 (0-0)              |                              | 0 (0-0)                         | 0 (0-0)                              |
| 2011 | Kazakhstan | 15 (10-19)                   |                                   | 1 (1-1)                              | 0 (0-0)                                   | 3 (1-5)                       |                                    | 0 (0-0)                               | 0 (0-0)                                    | 0 (0-0)              |                              | 0 (0-0)                         | 0 (0-0)                              |
| 2012 | Kazakhstan | 13 (9-17)                    |                                   | 1 (1-1)                              | 0 (0-0)                                   | 3 (1-4)                       |                                    | 0 (0-0)                               | 0 (0-0)                                    | 0 (0-0)              |                              | 0 (0-0)                         | 0 (0-0)                              |
| 2013 | Kazakhstan | 2 (1-2)                      |                                   | 0 (0-0)                              | 0 (0-0)                                   | 0 (0-1)                       |                                    | 0 (0-0)                               | 0 (0-0)                                    | 0 (0-0)              |                              | 0 (0-0)                         | 0 (0-0)                              |
| 2014 | Kazakhstan | 2 (1-2)                      |                                   | 0 (0-0)                              | 0 (0-0)                                   | 0 (0-1)                       |                                    | 0 (0-0)                               | 0 (0-0)                                    | 0 (0-0)              |                              | 0 (0-0)                         | 0 (0-0)                              |



| Year | Country                          | Hib pneumonia deaths (UR) | Hib pneumonia deaths, HIV (UR) | Hib pneumonia mortality rate (UR) | Hib pneumonia mortality rate, HIV (UR) | Hib meningitis deaths (UR) | Hib meningitis deaths, HIV (UR) | Hib meningitis mortality rate (UR) | Hib meningitis mortality rate, HIV (UR) | Hib NPNM deaths (UR) | Hib NPNM deaths, HIV (UR) | Hib NPNM mortality rate (UR) | Hib NPNM mortality rate, HIV (UR) |
|------|----------------------------------|---------------------------|--------------------------------|-----------------------------------|----------------------------------------|----------------------------|---------------------------------|------------------------------------|-----------------------------------------|----------------------|---------------------------|------------------------------|-----------------------------------|
| 2015 | Kazakhstan                       | 2 (1-2)                   | 0 (0-0)                        | 0 (0-0)                           | 0 (0-0)                                | 0 (0-0)                    | 0 (0-0)                         | 0 (0-0)                            | 0 (0-0)                                 | 0 (0-0)              | 0 (0-0)                   | 0 (0-0)                      | 0 (0-0)                           |
| 2000 | Kenya                            | 2916 (2051-3831)          |                                | 59 (41-77)                        |                                        | 1068 (360-1717)            |                                 | 21 (7-34)                          |                                         | 4 (1-7)              |                           | 0 (0-0)                      | 0 (0-0)                           |
| 2001 | Kenya                            | 2882 (2027-3787)          |                                | 56 (39-73)                        |                                        | 1054 (357-1693)            |                                 | 20 (7-33)                          |                                         | 4 (1-7)              |                           | 0 (0-0)                      | 0 (0-0)                           |
| 2002 | Kenya                            | 464 (327-610)             |                                | 9 (6-11)                          |                                        | 170 (58-272)               |                                 | 3 (1-5)                            |                                         | 1 (0-1)              |                           | 0 (0-0)                      | 0 (0-0)                           |
| 2003 | Kenya                            | 306 (215-403)             |                                | 6 (4-7)                           |                                        | 111 (38-178)               |                                 | 2 (1-3)                            |                                         | 0 (0-1)              |                           | 0 (0-0)                      | 0 (0-0)                           |
| 2004 | Kenya                            | 298 (210-392)             |                                | 5 (4-7)                           |                                        | 108 (37-172)               |                                 | 2 (1-3)                            |                                         | 0 (0-1)              |                           | 0 (0-0)                      | 0 (0-0)                           |
| 2005 | Kenya                            | 267 (188-351)             |                                | 5 (3-6)                           |                                        | 96 (34-153)                |                                 | 2 (1-3)                            |                                         | 0 (0-1)              |                           | 0 (0-0)                      | 0 (0-0)                           |
| 2006 | Kenya                            | 243 (171-319)             |                                | 4 (3-5)                           |                                        | 87 (31-138)                |                                 | 1 (1-2)                            |                                         | 0 (0-1)              |                           | 0 (0-0)                      | 0 (0-0)                           |
| 2007 | Kenya                            | 24 (17-32)                |                                | 0 (0-1)                           |                                        | 9 (3-14)                   |                                 | 0 (0-0)                            |                                         | 0 (0-0)              |                           | 0 (0-0)                      | 0 (0-0)                           |
| 2008 | Kenya                            | 23 (16-31)                |                                | 0 (0-0)                           |                                        | 8 (3-14)                   |                                 | 0 (0-0)                            |                                         | 0 (0-0)              |                           | 0 (0-0)                      | 0 (0-0)                           |
| 2009 | Kenya                            | 22 (16-29)                |                                | 0 (0-0)                           |                                        | 8 (3-13)                   |                                 | 0 (0-0)                            |                                         | 0 (0-0)              |                           | 0 (0-0)                      | 0 (0-0)                           |
| 2010 | Kenya                            | 21 (15-28)                |                                | 0 (0-0)                           |                                        | 8 (3-12)                   |                                 | 0 (0-0)                            |                                         | 0 (0-0)              |                           | 0 (0-0)                      | 0 (0-0)                           |
| 2011 | Kenya                            | 20 (14-27)                |                                | 0 (0-0)                           |                                        | 7 (2-11)                   |                                 | 0 (0-0)                            |                                         | 0 (0-0)              |                           | 0 (0-0)                      | 0 (0-0)                           |
| 2012 | Kenya                            | 20 (14-26)                |                                | 0 (0-0)                           |                                        | 7 (2-11)                   |                                 | 0 (0-0)                            |                                         | 0 (0-0)              |                           | 0 (0-0)                      | 0 (0-0)                           |
| 2013 | Kenya                            | 19 (13-25)                |                                | 0 (0-0)                           |                                        | 6 (2-10)                   |                                 | 0 (0-0)                            |                                         | 0 (0-0)              |                           | 0 (0-0)                      | 0 (0-0)                           |
| 2014 | Kenya                            | 18 (13-24)                |                                | 0 (0-0)                           |                                        | 6 (2-10)                   |                                 | 0 (0-0)                            |                                         | 0 (0-0)              |                           | 0 (0-0)                      | 0 (0-0)                           |
| 2015 | Kenya                            | 18 (12-23)                | 0 (0-1)                        | 0 (0-0)                           | 0 (0-0)                                | 6 (2-10)                   | 0 (0-0)                         | 0 (0-0)                            | 0 (0-0)                                 | 0 (0-0)              | 0 (0-0)                   | 0 (0-0)                      | 0 (0-0)                           |
| 2000 | Kiribati                         | 5 (4-7)                   |                                | 46 (32-60)                        |                                        | 3 (2-3)                    |                                 | 23 (13-30)                         |                                         | 0 (0-0)              |                           | 0 (0-0)                      | 0 (0-0)                           |
| 2001 | Kiribati                         | 5 (4-7)                   |                                | 42 (30-56)                        |                                        | 3 (1-3)                    |                                 | 21 (12-27)                         |                                         | 0 (0-0)              |                           | 0 (0-0)                      | 0 (0-0)                           |
| 2002 | Kiribati                         | 5 (3-6)                   |                                | 40 (28-52)                        |                                        | 2 (1-3)                    |                                 | 20 (11-26)                         |                                         | 0 (0-0)              |                           | 0 (0-0)                      | 0 (0-0)                           |
| 2003 | Kiribati                         | 4 (3-5)                   |                                | 36 (26-48)                        |                                        | 2 (1-3)                    |                                 | 18 (10-23)                         |                                         | 0 (0-0)              |                           | 0 (0-0)                      | 0 (0-0)                           |
| 2004 | Kiribati                         | 4 (3-5)                   |                                | 35 (25-46)                        |                                        | 2 (1-2)                    |                                 | 18 (10-23)                         |                                         | 0 (0-0)              |                           | 0 (0-0)                      | 0 (0-0)                           |
| 2005 | Kiribati                         | 4 (3-5)                   |                                | 37 (26-48)                        |                                        | 2 (1-3)                    |                                 | 18 (10-24)                         |                                         | 0 (0-0)              |                           | 0 (0-0)                      | 0 (0-0)                           |
| 2006 | Kiribati                         | 4 (3-6)                   |                                | 41 (29-54)                        |                                        | 2 (1-3)                    |                                 | 21 (12-26)                         |                                         | 0 (0-0)              |                           | 0 (0-0)                      | 0 (0-0)                           |
| 2007 | Kiribati                         | 5 (3-6)                   |                                | 46 (32-60)                        |                                        | 2 (1-3)                    |                                 | 23 (13-30)                         |                                         | 0 (0-0)              |                           | 0 (0-0)                      | 0 (0-0)                           |
| 2008 | Kiribati                         | 1 (1-1)                   |                                | 6 (6-11)                          |                                        | 0 (0-1)                    |                                 | 4 (2-5)                            |                                         | 0 (0-0)              |                           | 0 (0-0)                      | 0 (0-0)                           |
| 2009 | Kiribati                         | 1 (0-1)                   |                                | 4 (3-6)                           |                                        | 0 (0-0)                    |                                 | 2 (1-3)                            |                                         | 0 (0-0)              |                           | 0 (0-0)                      | 0 (0-0)                           |
| 2010 | Kiribati                         | 1 (0-1)                   |                                | 4 (3-5)                           |                                        | 0 (0-0)                    |                                 | 2 (1-3)                            |                                         | 0 (0-0)              |                           | 0 (0-0)                      | 0 (0-0)                           |
| 2011 | Kiribati                         | 0 (0-1)                   |                                | 3 (2-4)                           |                                        | 0 (0-0)                    |                                 | 2 (1-2)                            |                                         | 0 (0-0)              |                           | 0 (0-0)                      | 0 (0-0)                           |
| 2012 | Kiribati                         | 0 (0-1)                   |                                | 3 (2-4)                           |                                        | 0 (0-0)                    |                                 | 2 (1-2)                            |                                         | 0 (0-0)              |                           | 0 (0-0)                      | 0 (0-0)                           |
| 2013 | Kiribati                         | 0 (0-0)                   |                                | 0 (0-1)                           |                                        | 0 (0-0)                    |                                 | 0 (0-0)                            |                                         | 0 (0-0)              |                           | 0 (0-0)                      | 0 (0-0)                           |
| 2014 | Kiribati                         | 0 (0-0)                   |                                | 0 (0-0)                           |                                        | 0 (0-0)                    |                                 | 0 (0-0)                            |                                         | 0 (0-0)              |                           | 0 (0-0)                      | 0 (0-0)                           |
| 2015 | Kiribati                         | 0 (0-0)                   | 0 (0-0)                        | 0 (0-0)                           | 0 (0-0)                                | 0 (0-0)                    | 0 (0-0)                         | 0 (0-0)                            | 0 (0-0)                                 | 0 (0-0)              | 0 (0-0)                   | 0 (0-0)                      | 0 (0-0)                           |
| 2000 | Kuwait                           | 0 (0-1)                   |                                | 0 (0-0)                           |                                        | 0 (0-0)                    |                                 | 0 (0-0)                            |                                         | 0 (0-0)              |                           | 0 (0-0)                      | 0 (0-0)                           |
| 2001 | Kuwait                           | 0 (0-1)                   |                                | 0 (0-0)                           |                                        | 0 (0-0)                    |                                 | 0 (0-0)                            |                                         | 0 (0-0)              |                           | 0 (0-0)                      | 0 (0-0)                           |
| 2002 | Kuwait                           | 0 (0-1)                   |                                | 0 (0-0)                           |                                        | 0 (0-0)                    |                                 | 0 (0-0)                            |                                         | 0 (0-0)              |                           | 0 (0-0)                      | 0 (0-0)                           |
| 2003 | Kuwait                           | 0 (0-0)                   |                                | 0 (0-0)                           |                                        | 0 (0-0)                    |                                 | 0 (0-0)                            |                                         | 0 (0-0)              |                           | 0 (0-0)                      | 0 (0-0)                           |
| 2004 | Kuwait                           | 0 (0-0)                   |                                | 0 (0-0)                           |                                        | 0 (0-0)                    |                                 | 0 (0-0)                            |                                         | 0 (0-0)              |                           | 0 (0-0)                      | 0 (0-0)                           |
| 2005 | Kuwait                           | 0 (0-0)                   |                                | 0 (0-0)                           |                                        | 0 (0-0)                    |                                 | 0 (0-0)                            |                                         | 0 (0-0)              |                           | 0 (0-0)                      | 0 (0-0)                           |
| 2006 | Kuwait                           | 0 (0-0)                   |                                | 0 (0-0)                           |                                        | 0 (0-0)                    |                                 | 0 (0-0)                            |                                         | 0 (0-0)              |                           | 0 (0-0)                      | 0 (0-0)                           |
| 2007 | Kuwait                           | 0 (0-0)                   |                                | 0 (0-0)                           |                                        | 0 (0-0)                    |                                 | 0 (0-0)                            |                                         | 0 (0-0)              |                           | 0 (0-0)                      | 0 (0-0)                           |
| 2008 | Kuwait                           | 0 (0-0)                   |                                | 0 (0-0)                           |                                        | 0 (0-0)                    |                                 | 0 (0-0)                            |                                         | 0 (0-0)              |                           | 0 (0-0)                      | 0 (0-0)                           |
| 2009 | Kuwait                           | 0 (0-0)                   |                                | 0 (0-0)                           |                                        | 0 (0-0)                    |                                 | 0 (0-0)                            |                                         | 0 (0-0)              |                           | 0 (0-0)                      | 0 (0-0)                           |
| 2010 | Kuwait                           | 0 (0-0)                   |                                | 0 (0-0)                           |                                        | 0 (0-0)                    |                                 | 0 (0-0)                            |                                         | 0 (0-0)              |                           | 0 (0-0)                      | 0 (0-0)                           |
| 2011 | Kuwait                           | 0 (0-0)                   |                                | 0 (0-0)                           |                                        | 0 (0-0)                    |                                 | 0 (0-0)                            |                                         | 0 (0-0)              |                           | 0 (0-0)                      | 0 (0-0)                           |
| 2012 | Kuwait                           | 0 (0-0)                   |                                | 0 (0-0)                           |                                        | 0 (0-0)                    |                                 | 0 (0-0)                            |                                         | 0 (0-0)              |                           | 0 (0-0)                      | 0 (0-0)                           |
| 2013 | Kuwait                           | 0 (0-0)                   |                                | 0 (0-0)                           |                                        | 0 (0-0)                    |                                 | 0 (0-0)                            |                                         | 0 (0-0)              |                           | 0 (0-0)                      | 0 (0-0)                           |
| 2014 | Kuwait                           | 0 (0-0)                   |                                | 0 (0-0)                           |                                        | 0 (0-0)                    |                                 | 0 (0-0)                            |                                         | 0 (0-0)              |                           | 0 (0-0)                      | 0 (0-0)                           |
| 2015 | Kuwait                           | 0 (0-0)                   | 0 (0-0)                        | 0 (0-0)                           | 0 (0-0)                                | 0 (0-0)                    | 0 (0-0)                         | 0 (0-0)                            | 0 (0-0)                                 | 0 (0-0)              | 0 (0-0)                   | 0 (0-0)                      | 0 (0-0)                           |
| 2000 | Kyrgyzstan                       | 156 (110-205)             |                                | 29 (20-38)                        |                                        | 62 (22-98)                 |                                 | 12 (4-18)                          |                                         | 0 (0-1)              |                           | 0 (0-0)                      | 0 (0-0)                           |
| 2001 | Kyrgyzstan                       | 144 (101-189)             |                                | 27 (19-36)                        |                                        | 57 (20-90)                 |                                 | 11 (4-17)                          |                                         | 0 (0-1)              |                           | 0 (0-0)                      | 0 (0-0)                           |
| 2002 | Kyrgyzstan                       | 132 (93-174)              |                                | 26 (18-34)                        |                                        | 52 (18-82)                 |                                 | 10 (4-16)                          |                                         | 0 (0-1)              |                           | 0 (0-0)                      | 0 (0-0)                           |
| 2003 | Kyrgyzstan                       | 121 (85-159)              |                                | 25 (17-32)                        |                                        | 47 (17-74)                 |                                 | 10 (3-15)                          |                                         | 0 (0-1)              |                           | 0 (0-0)                      | 0 (0-0)                           |
| 2004 | Kyrgyzstan                       | 113 (79-148)              |                                | 23 (16-31)                        |                                        | 43 (15-69)                 |                                 | 9 (3-14)                           |                                         | 0 (0-1)              |                           | 0 (0-0)                      | 0 (0-0)                           |
| 2005 | Kyrgyzstan                       | 108 (76-142)              |                                | 22 (16-29)                        |                                        | 41 (14-65)                 |                                 | 8 (3-13)                           |                                         | 0 (0-1)              |                           | 0 (0-0)                      | 0 (0-0)                           |
| 2006 | Kyrgyzstan                       | 106 (74-139)              |                                | 21 (15-28)                        |                                        | 40 (14-63)                 |                                 | 8 (3-13)                           |                                         | 0 (0-1)              |                           | 0 (0-0)                      | 0 (0-0)                           |
| 2007 | Kyrgyzstan                       | 105 (74-138)              |                                | 21 (14-27)                        |                                        | 39 (14-62)                 |                                 | 8 (3-12)                           |                                         | 0 (0-0)              |                           | 0 (0-0)                      | 0 (0-0)                           |
| 2008 | Kyrgyzstan                       | 104 (74-136)              |                                | 19 (14-25)                        |                                        | 38 (13-61)                 |                                 | 7 (2-11)                           |                                         | 0 (0-0)              |                           | 0 (0-0)                      | 0 (0-0)                           |
| 2009 | Kyrgyzstan                       | 105 (74-136)              |                                | 19 (13-24)                        |                                        | 38 (13-61)                 |                                 | 7 (2-11)                           |                                         | 0 (0-0)              |                           | 0 (0-0)                      | 0 (0-0)                           |
| 2010 | Kyrgyzstan                       | 16 (11-21)                |                                | 3 (2-4)                           |                                        | 6 (2-9)                    |                                 | 1 (0-2)                            |                                         | 0 (0-0)              |                           | 0 (0-0)                      | 0 (0-0)                           |
| 2011 | Kyrgyzstan                       | 7 (5-10)                  |                                | 1 (1-2)                           |                                        | 3 (0-5)                    |                                 | 0 (0-1)                            |                                         | 0 (0-0)              |                           | 0 (0-0)                      | 0 (0-0)                           |
| 2012 | Kyrgyzstan                       | 7 (5-10)                  |                                | 1 (1-1)                           |                                        | 3 (0-4)                    |                                 | 0 (0-1)                            |                                         | 0 (0-0)              |                           | 0 (0-0)                      | 0 (0-0)                           |
| 2013 | Kyrgyzstan                       | 7 (5-9)                   |                                | 1 (1-1)                           |                                        | 2 (0-4)                    |                                 | 0 (0-1)                            |                                         | 0 (0-0)              |                           | 0 (0-0)                      | 0 (0-0)                           |
| 2014 | Kyrgyzstan                       | 7 (5-9)                   |                                | 1 (1-1)                           |                                        | 2 (0-4)                    |                                 | 0 (0-1)                            |                                         | 0 (0-0)              |                           | 0 (0-0)                      | 0 (0-0)                           |
| 2015 | Kyrgyzstan                       | 1 (1-1)                   | 0 (0-0)                        | 0 (0-0)                           | 0 (0-0)                                | 0 (0-1)                    | 0 (0-0)                         | 0 (0-0)                            | 0 (0-0)                                 | 0 (0-0)              | 0 (0-0)                   | 0 (0-0)                      | 0 (0-0)                           |
| 2000 | Lao People's Democratic Republic | 563 (396-740)             |                                | 71 (50-94)                        |                                        | 210 (65-336)               |                                 | 27 (8-43)                          |                                         | 1 (0-1)              |                           | 0 (0-0)                      | 0 (0-0)                           |
| 2001 | Lao People's Democratic Republic | 543 (382-714)             |                                | 71 (50-93)                        |                                        | 200 (61-320)               |                                 | 26 (8-42)                          |                                         | 1 (0-1)              |                           | 0 (0-0)                      | 0 (0-0)                           |
| 2002 | Lao People's Democratic Republic | 525 (369-689)             |                                | 70 (49-91)                        |                                        | 190 (58-306)               |                                 | 25 (8-41)                          |                                         | 1 (0-1)              |                           | 0 (0-0)                      | 0 (0-0)                           |
| 2003 | Lao People's Democratic Republic | 511 (359-671)             |                                | 68 (48-90)                        |                                        | 183 (56-294)               |                                 | 24 (7-39)                          |                                         | 1 (0-1)              |                           | 0 (0-0)                      | 0 (0-0)                           |
| 2004 | Lao People's Democratic Republic | 499 (351-655)             |                                | 67 (47-88)                        |                                        | 175 (53-292)               |                                 | 24 (7-38)                          |                                         | 1 (0-1)              |                           | 0 (0-0)                      | 0 (0-0)                           |
| 2005 | Lao People's Democratic Republic | 487 (343-641)             |                                | 65 (46-86)                        |                                        | 169 (51-272)               |                                 | 23 (7-37)                          |                                         | 1 (0-1)              |                           | 0 (0-0)                      | 0 (0-0)                           |
| 2006 | Lao People's Democratic Republic | 480 (337-630)             |                                | 64 (45-84)                        |                                        | 163 (49-264)               |                                 | 22 (7-35)                          |                                         | 1 (0-1)              |                           | 0 (0-0)                      | 0 (0-0)                           |
| 2007 | Lao People's Democratic Republic | 470 (331-618)             |                                | 62 (44-81)                        |                                        | 158 (49-253)               |                                 | 21 (6-33)                          |                                         | 1 (0-1)              |                           | 0 (0-0)                      | 0 (0-0)                           |
| 2008 | Lao People's Democratic Republic | 463 (325-604)             |                                | 60 (42-79)                        |                                        | 153 (49-244)               |                                 | 20 (6-32)                          |                                         | 1 (0-1)              |                           | 0 (0-0)                      | 0 (0-0)                           |
| 2009 | Lao People's Democratic Republic | 451 (317-592)             |                                | 57 (40-75)                        |                                        | 147 (49-232)               |                                 | 19 (6-30)                          |                                         | 1 (0-1)              |                           | 0 (0-0)                      | 0 (0-0)                           |
| 2010 | Lao People's Democratic Republic | 105 (74-138)              |                                | 13 (9-17)                         |                                        | 34 (12-53)                 |                                 | 4 (1-7)                            |                                         | 0 (0-0)              |                           | 0 (0-0)                      | 0 (0-0)                           |
| 2011 | Lao People's Democratic Republic | 43 (30-57)                |                                | 5 (4-7)                           |                                        | 14 (5-21)                  |                                 | 2 (1-3)                            |                                         | 0 (0-0)              |                           | 0 (0-0)                      | 0 (0-0)                           |
| 2012 | Lao People's Democratic Republic | 40 (28-53)                |                                | 5 (3-6)                           |                                        | 13 (4-20)                  |                                 | 2 (0-2)                            |                                         | 0 (0-0)              |                           | 0 (0-0)                      | 0 (0-0)                           |
| 2013 | Lao People's Democratic Republic | 33 (23-43)                |                                | 4 (3-5)                           |                                        | 10 (3-16)                  |                                 | 1 (0-2)                            |                                         | 0 (0-0)              |                           | 0 (0-0)                      | 0 (0-0)                           |
| 2014 | Lao People's Democratic Republic | 31 (22-40)                |                                | 4 (3-5)                           |                                        | 9 (3-15)                   |                                 | 1 (0-2)                            |                                         | 0 (0-0)              |                           | 0 (0-0)                      | 0 (0-0)                           |
| 2015 | Lao People's Democratic Republic | 3 (2-5)                   | 0 (0-0)                        | 0 (0-1)                           | 0 (0-0)                                | 1 (0-2)                    | 0 (0-0)                         | 0 (0-0)                            | 0 (0-0)                                 | 0 (0-0)              | 0 (0-0)                   | 0 (0-0)                      | 0 (0-0)                           |
| 2000 | Latvia                           | 0 (0-0)                   |                                | 0 (0-0)                           |                                        | 0 (0-0)                    |                                 | 0 (0-0)                            |                                         | 0 (0-0)              |                           | 0 (0-0)                      | 0 (0-0)                           |
| 2001 | Latvia                           | 0 (0-0)                   |                                | 0 (0-0)                           |                                        | 0 (0-0)                    |                                 | 0 (0-0)                            |                                         | 0 (0-0)              |                           | 0 (0-0)                      | 0 (0-0)                           |
| 2002 | Latvia                           | 0 (0-0)                   |                                | 0 (0-0)                           |                                        | 0 (0-0)                    |                                 | 0 (0-0)                            |                                         | 0 (0-0)              |                           | 0 (0-0)                      | 0 (0-0)                           |
| 2003 | Latvia                           | 0 (0-0)                   |                                | 0 (0-0)                           |                                        | 0 (0-0)                    |                                 | 0 (0-0)                            |                                         | 0 (0-0)              |                           | 0 (0-0)                      | 0 (0-0)                           |
| 2004 | Latvia                           | 0 (0-0)                   |                                | 0 (0-0)                           |                                        | 0 (0-0)                    |                                 | 0 (0-0)                            |                                         | 0 (0-0)              |                           | 0 (0-0)                      | 0 (0-0)                           |
| 2005 | Latvia                           | 0 (0-0)                   |                                | 0 (0-0)                           |                                        | 0 (0-0)                    |                                 | 0 (0-0)                            |                                         | 0 (0-0)              |                           | 0 (0-0)                      | 0 (0-0)                           |
| 2006 | Latvia                           | 0 (0-0)                   |                                | 0 (0-0)                           |                                        | 0 (0-0)                    |                                 | 0 (0-0)                            |                                         | 0 (0-0)              |                           | 0 (0-0)                      | 0 (0-0)                           |

Hib = *Haemophilus influenzae* type b; npnm = non-pneumonia, non-meningitis; HIV = deaths only in HIV-infected children; Uncertainty range provided in parentheses.

| Year | Country   | Hib pneumonia deaths (UR) | Hib pneumonia deaths, HIV (UR) | Hib pneumonia mortality rate (UR) | Hib pneumonia mortality rate, HIV (UR) | Hib meningitis deaths (UR) | Hib meningitis deaths, HIV (UR) | Hib meningitis mortality rate (UR) | Hib meningitis mortality rate, HIV (UR) | Hib NPNM deaths (UR) | Hib NPNM deaths, HIV (UR) | Hib NPNM mortality rate (UR) | Hib NPNM mortality rate, HIV (UR) |
|------|-----------|---------------------------|--------------------------------|-----------------------------------|----------------------------------------|----------------------------|---------------------------------|------------------------------------|-----------------------------------------|----------------------|---------------------------|------------------------------|-----------------------------------|
| 2007 | Latvia    | 0 (0-0)                   |                                | 0 (0-0)                           |                                        | 0 (0-0)                    |                                 | 0 (0-0)                            |                                         | 0 (0-0)              |                           | 0 (0-0)                      |                                   |
| 2008 | Latvia    | 0 (0-0)                   |                                | 0 (0-0)                           |                                        | 0 (0-0)                    |                                 | 0 (0-0)                            |                                         | 0 (0-0)              |                           | 0 (0-0)                      |                                   |
| 2009 | Latvia    | 0 (0-0)                   |                                | 0 (0-0)                           |                                        | 0 (0-0)                    |                                 | 0 (0-0)                            |                                         | 0 (0-0)              |                           | 0 (0-0)                      |                                   |
| 2010 | Latvia    | 0 (0-0)                   |                                | 0 (0-0)                           |                                        | 0 (0-0)                    |                                 | 0 (0-0)                            |                                         | 0 (0-0)              |                           | 0 (0-0)                      |                                   |
| 2011 | Latvia    | 0 (0-0)                   |                                | 0 (0-0)                           |                                        | 0 (0-0)                    |                                 | 0 (0-0)                            |                                         | 0 (0-0)              |                           | 0 (0-0)                      |                                   |
| 2012 | Latvia    | 0 (0-0)                   |                                | 0 (0-0)                           |                                        | 0 (0-0)                    |                                 | 0 (0-0)                            |                                         | 0 (0-0)              |                           | 0 (0-0)                      |                                   |
| 2013 | Latvia    | 0 (0-0)                   |                                | 0 (0-0)                           |                                        | 0 (0-0)                    |                                 | 0 (0-0)                            |                                         | 0 (0-0)              |                           | 0 (0-0)                      |                                   |
| 2014 | Latvia    | 0 (0-0)                   |                                | 0 (0-0)                           |                                        | 0 (0-0)                    |                                 | 0 (0-0)                            |                                         | 0 (0-0)              |                           | 0 (0-0)                      |                                   |
| 2015 | Latvia    | 0 (0-0)                   |                                | 0 (0-0)                           |                                        | 0 (0-0)                    |                                 | 0 (0-0)                            |                                         | 0 (0-0)              |                           | 0 (0-0)                      |                                   |
| 2000 | Lebanon   | 16 (12-22)                | 0 (0-0)                        | 5 (4-7)                           | 0 (0-0)                                | 3 (0-5)                    | 0 (0-0)                         | 1 (0-2)                            | 0 (0-0)                                 | 0 (0-0)              | 0 (0-0)                   | 0 (0-0)                      | 0 (0-0)                           |
| 2001 | Lebanon   | 15 (10-19)                |                                | 5 (3-6)                           |                                        | 2 (0-4)                    |                                 | 1 (0-1)                            |                                         | 0 (0-0)              |                           | 0 (0-0)                      |                                   |
| 2002 | Lebanon   | 14 (10-18)                |                                | 4 (3-6)                           |                                        | 2 (0-4)                    |                                 | 1 (0-1)                            |                                         | 0 (0-0)              |                           | 0 (0-0)                      |                                   |
| 2003 | Lebanon   | 3 (2-4)                   |                                | 1 (1-1)                           |                                        | 1 (0-2)                    |                                 | 0 (0-0)                            |                                         | 0 (0-0)              |                           | 0 (0-0)                      |                                   |
| 2004 | Lebanon   | 1 (1-2)                   |                                | 0 (0-1)                           |                                        | 0 (0-1)                    |                                 | 0 (0-0)                            |                                         | 0 (0-0)              |                           | 0 (0-0)                      |                                   |
| 2005 | Lebanon   | 1 (1-2)                   |                                | 0 (0-0)                           |                                        | 0 (0-1)                    |                                 | 0 (0-0)                            |                                         | 0 (0-0)              |                           | 0 (0-0)                      |                                   |
| 2006 | Lebanon   | 1 (1-1)                   |                                | 0 (0-0)                           |                                        | 0 (0-0)                    |                                 | 0 (0-0)                            |                                         | 0 (0-0)              |                           | 0 (0-0)                      |                                   |
| 2007 | Lebanon   | 1 (1-1)                   |                                | 0 (0-0)                           |                                        | 0 (0-0)                    |                                 | 0 (0-0)                            |                                         | 0 (0-0)              |                           | 0 (0-0)                      |                                   |
| 2008 | Lebanon   | 0 (0-0)                   |                                | 0 (0-0)                           |                                        | 0 (0-0)                    |                                 | 0 (0-0)                            |                                         | 0 (0-0)              |                           | 0 (0-0)                      |                                   |
| 2009 | Lebanon   | 0 (0-0)                   |                                | 0 (0-0)                           |                                        | 0 (0-0)                    |                                 | 0 (0-0)                            |                                         | 0 (0-0)              |                           | 0 (0-0)                      |                                   |
| 2010 | Lebanon   | 0 (0-0)                   |                                | 0 (0-0)                           |                                        | 0 (0-0)                    |                                 | 0 (0-0)                            |                                         | 0 (0-0)              |                           | 0 (0-0)                      |                                   |
| 2011 | Lebanon   | 0 (0-0)                   |                                | 0 (0-0)                           |                                        | 0 (0-0)                    |                                 | 0 (0-0)                            |                                         | 0 (0-0)              |                           | 0 (0-0)                      |                                   |
| 2012 | Lebanon   | 0 (0-0)                   |                                | 0 (0-0)                           |                                        | 0 (0-0)                    |                                 | 0 (0-0)                            |                                         | 0 (0-0)              |                           | 0 (0-0)                      |                                   |
| 2013 | Lebanon   | 0 (0-0)                   |                                | 0 (0-0)                           |                                        | 0 (0-0)                    |                                 | 0 (0-0)                            |                                         | 0 (0-0)              |                           | 0 (0-0)                      |                                   |
| 2014 | Lebanon   | 0 (0-0)                   |                                | 0 (0-0)                           |                                        | 0 (0-0)                    |                                 | 0 (0-0)                            |                                         | 0 (0-0)              |                           | 0 (0-0)                      |                                   |
| 2015 | Lebanon   | 0 (0-0)                   | 0 (0-0)                        | 0 (0-0)                           | 0 (0-0)                                | 0 (0-0)                    | 0 (0-0)                         | 0 (0-0)                            | 0 (0-0)                                 | 0 (0-0)              | 0 (0-0)                   | 0 (0-0)                      | 0 (0-0)                           |
| 2000 | Lesotho   | 152 (107-200)             |                                | 57 (40-75)                        | 0 (0-0)                                | 54 (19-87)                 |                                 | 20 (7-33)                          | 0 (0-0)                                 | 0 (0-0)              |                           | 0 (0-0)                      | 0 (0-0)                           |
| 2001 | Lesotho   | 156 (109-204)             |                                | 59 (41-77)                        |                                        | 55 (19-87)                 |                                 | 21 (7-33)                          |                                         | 0 (0-0)              |                           | 0 (0-0)                      | 0 (0-0)                           |
| 2002 | Lesotho   | 157 (111-207)             |                                | 60 (42-79)                        |                                        | 55 (20-87)                 |                                 | 21 (8-33)                          |                                         | 0 (0-0)              |                           | 0 (0-0)                      | 0 (0-0)                           |
| 2003 | Lesotho   | 157 (110-206)             |                                | 61 (43-80)                        |                                        | 55 (20-86)                 |                                 | 21 (8-34)                          |                                         | 0 (0-0)              |                           | 0 (0-0)                      | 0 (0-0)                           |
| 2004 | Lesotho   | 156 (110-205)             |                                | 62 (44-81)                        |                                        | 54 (20-85)                 |                                 | 22 (8-34)                          |                                         | 0 (0-0)              |                           | 0 (0-0)                      | 0 (0-0)                           |
| 2005 | Lesotho   | 156 (110-205)             |                                | 63 (44-82)                        |                                        | 54 (21-85)                 |                                 | 22 (8-34)                          |                                         | 0 (0-0)              |                           | 0 (0-0)                      | 0 (0-0)                           |
| 2006 | Lesotho   | 158 (111-207)             |                                | 64 (45-85)                        |                                        | 55 (21-86)                 |                                 | 22 (9-35)                          |                                         | 0 (0-0)              |                           | 0 (0-0)                      | 0 (0-0)                           |
| 2007 | Lesotho   | 158 (111-207)             |                                | 65 (46-85)                        |                                        | 55 (21-85)                 |                                 | 22 (9-35)                          |                                         | 0 (0-0)              |                           | 0 (0-0)                      | 0 (0-0)                           |
| 2008 | Lesotho   | 162 (114-213)             |                                | 66 (47-87)                        |                                        | 56 (22-87)                 |                                 | 23 (9-36)                          |                                         | 0 (0-0)              |                           | 0 (0-0)                      | 0 (0-0)                           |
| 2009 | Lesotho   | 26 (18-34)                |                                | 10 (7-14)                         |                                        | 9 (4-14)                   |                                 | 4 (1-6)                            |                                         | 0 (0-0)              |                           | 0 (0-0)                      | 0 (0-0)                           |
| 2010 | Lesotho   | 12 (9-16)                 |                                | 5 (3-6)                           |                                        | 4 (2-6)                    |                                 | 2 (1-3)                            |                                         | 0 (0-0)              |                           | 0 (0-0)                      | 0 (0-0)                           |
| 2011 | Lesotho   | 12 (8-15)                 |                                | 5 (3-6)                           |                                        | 4 (2-6)                    |                                 | 2 (1-2)                            |                                         | 0 (0-0)              |                           | 0 (0-0)                      | 0 (0-0)                           |
| 2012 | Lesotho   | 12 (8-16)                 |                                | 5 (3-6)                           |                                        | 4 (2-6)                    |                                 | 2 (1-2)                            |                                         | 0 (0-0)              |                           | 0 (0-0)                      | 0 (0-0)                           |
| 2013 | Lesotho   | 13 (9-17)                 |                                | 5 (3-6)                           |                                        | 4 (2-7)                    |                                 | 2 (1-2)                            |                                         | 0 (0-0)              |                           | 0 (0-0)                      | 0 (0-0)                           |
| 2014 | Lesotho   | 2 (1-2)                   |                                | 1 (0-1)                           |                                        | 1 (0-1)                    |                                 | 0 (0-0)                            |                                         | 0 (0-0)              |                           | 0 (0-0)                      | 0 (0-0)                           |
| 2015 | Lesotho   | 2 (1-2)                   | 0 (0-0)                        | 1 (0-1)                           | 0 (0-0)                                | 1 (0-1)                    | 0 (0-0)                         | 0 (0-0)                            | 0 (0-0)                                 | 0 (0-0)              | 0 (0-0)                   | 0 (0-0)                      | 0 (0-0)                           |
| 2000 | Liberia   | 415 (292-546)             |                                | 85 (60-112)                       |                                        | 247 (142-344)              |                                 | 51 (29-70)                         |                                         | 1 (1-1)              |                           | 0 (0-0)                      | 0 (0-0)                           |
| 2001 | Liberia   | 414 (291-544)             |                                | 81 (57-106)                       |                                        | 247 (140-345)              |                                 | 48 (27-67)                         |                                         | 1 (1-1)              |                           | 0 (0-0)                      | 0 (0-0)                           |
| 2002 | Liberia   | 401 (282-527)             |                                | 76 (53-100)                       |                                        | 241 (136-338)              |                                 | 46 (26-64)                         |                                         | 1 (1-1)              |                           | 0 (0-0)                      | 0 (0-0)                           |
| 2003 | Liberia   | 384 (270-504)             |                                | 72 (50-94)                        |                                        | 235 (168-302)              |                                 | 44 (18-67)                         |                                         | 1 (0-1)              |                           | 0 (0-0)                      | 0 (0-0)                           |
| 2004 | Liberia   | 370 (261-487)             |                                | 68 (48-90)                        |                                        | 225 (162-348)              |                                 | 42 (17-64)                         |                                         | 1 (0-1)              |                           | 0 (0-0)                      | 0 (0-0)                           |
| 2005 | Liberia   | 367 (258-482)             |                                | 66 (46-87)                        |                                        | 218 (168-338)              |                                 | 39 (16-61)                         |                                         | 1 (0-1)              |                           | 0 (0-0)                      | 0 (0-0)                           |
| 2006 | Liberia   | 364 (256-479)             |                                | 64 (45-84)                        |                                        | 211 (163-329)              |                                 | 37 (15-57)                         |                                         | 1 (0-1)              |                           | 0 (0-0)                      | 0 (0-0)                           |
| 2007 | Liberia   | 367 (258-483)             |                                | 62 (44-82)                        |                                        | 206 (160-322)              |                                 | 35 (13-55)                         |                                         | 1 (0-1)              |                           | 0 (0-0)                      | 0 (0-0)                           |
| 2008 | Liberia   | 134 (94-176)              |                                | 22 (15-29)                        |                                        | 73 (28-115)                |                                 | 12 (5-19)                          |                                         | 0 (0-0)              |                           | 0 (0-0)                      | 0 (0-0)                           |
| 2009 | Liberia   | 47 (33-61)                |                                | 7 (5-10)                          |                                        | 25 (9-39)                  |                                 | 4 (1-6)                            |                                         | 0 (0-0)              |                           | 0 (0-0)                      | 0 (0-0)                           |
| 2010 | Liberia   | 56 (40-74)                |                                | 9 (6-11)                          |                                        | 29 (11-46)                 |                                 | 5 (2-7)                            |                                         | 0 (0-0)              |                           | 0 (0-0)                      | 0 (0-0)                           |
| 2011 | Liberia   | 36 (26-48)                |                                | 6 (4-7)                           |                                        | 19 (7-30)                  |                                 | 3 (1-5)                            |                                         | 0 (0-0)              |                           | 0 (0-0)                      | 0 (0-0)                           |
| 2012 | Liberia   | 33 (24-44)                |                                | 5 (4-7)                           |                                        | 17 (6-27)                  |                                 | 3 (1-4)                            |                                         | 0 (0-0)              |                           | 0 (0-0)                      | 0 (0-0)                           |
| 2013 | Liberia   | 3 (2-4)                   |                                | 0 (0-1)                           |                                        | 2 (1-3)                    |                                 | 0 (0-0)                            |                                         | 0 (0-0)              |                           | 0 (0-0)                      | 0 (0-0)                           |
| 2014 | Liberia   | 47 (33-62)                |                                | 7 (5-9)                           |                                        | 24 (7-40)                  |                                 | 4 (1-6)                            |                                         | 0 (0-0)              |                           | 0 (0-0)                      | 0 (0-0)                           |
| 2015 | Liberia   | 45 (32-59)                | 0 (0-1)                        | 7 (5-9)                           | 0 (0-0)                                | 23 (7-38)                  | 0 (0-0)                         | 3 (1-6)                            | 0 (0-0)                                 | 0 (0-0)              | 0 (0-0)                   | 0 (0-0)                      | 0 (0-0)                           |
| 2000 | Libya     | 55 (39-72)                |                                | 10 (7-13)                         |                                        | 6 (3-10)                   |                                 | 1 (1-2)                            |                                         | 0 (0-0)              |                           | 0 (0-0)                      | 0 (0-0)                           |
| 2001 | Libya     | 53 (37-69)                |                                | 9 (7-12)                          |                                        | 6 (3-10)                   |                                 | 1 (1-2)                            |                                         | 0 (0-0)              |                           | 0 (0-0)                      | 0 (0-0)                           |
| 2002 | Libya     | 50 (35-66)                |                                | 9 (6-12)                          |                                        | 6 (3-9)                    |                                 | 1 (1-2)                            |                                         | 0 (0-0)              |                           | 0 (0-0)                      | 0 (0-0)                           |
| 2003 | Libya     | 47 (33-62)                |                                | 8 (6-11)                          |                                        | 5 (3-9)                    |                                 | 1 (0-2)                            |                                         | 0 (0-0)              |                           | 0 (0-0)                      | 0 (0-0)                           |
| 2004 | Libya     | 44 (31-58)                |                                | 8 (5-10)                          |                                        | 5 (3-8)                    |                                 | 1 (0-1)                            |                                         | 0 (0-0)              |                           | 0 (0-0)                      | 0 (0-0)                           |
| 2005 | Libya     | 41 (29-54)                |                                | 7 (5-9)                           |                                        | 5 (2-8)                    |                                 | 1 (0-1)                            |                                         | 0 (0-0)              |                           | 0 (0-0)                      | 0 (0-0)                           |
| 2006 | Libya     | 38 (27-50)                |                                | 6 (4-8)                           |                                        | 4 (2-7)                    |                                 | 1 (0-1)                            |                                         | 0 (0-0)              |                           | 0 (0-0)                      | 0 (0-0)                           |
| 2007 | Libya     | 17 (12-23)                |                                | 3 (2-4)                           |                                        | 3 (1-5)                    |                                 | 0 (0-1)                            |                                         | 0 (0-0)              |                           | 0 (0-0)                      | 0 (0-0)                           |
| 2008 | Libya     | 3 (2-3)                   |                                | 0 (0-1)                           |                                        | 0 (0-1)                    |                                 | 0 (0-0)                            |                                         | 0 (0-0)              |                           | 0 (0-0)                      | 0 (0-0)                           |
| 2009 | Libya     | 2 (2-3)                   |                                | 0 (0-0)                           |                                        | 0 (0-1)                    |                                 | 0 (0-0)                            |                                         | 0 (0-0)              |                           | 0 (0-0)                      | 0 (0-0)                           |
| 2010 | Libya     | 2 (2-3)                   |                                | 0 (0-0)                           |                                        | 0 (0-1)                    |                                 | 0 (0-0)                            |                                         | 0 (0-0)              |                           | 0 (0-0)                      | 0 (0-0)                           |
| 2011 | Libya     | 2 (1-3)                   |                                | 0 (0-0)                           |                                        | 0 (0-1)                    |                                 | 0 (0-0)                            |                                         | 0 (0-0)              |                           | 0 (0-0)                      | 0 (0-0)                           |
| 2012 | Libya     | 0 (0-0)                   |                                | 0 (0-0)                           |                                        | 0 (0-0)                    |                                 | 0 (0-0)                            |                                         | 0 (0-0)              |                           | 0 (0-0)                      | 0 (0-0)                           |
| 2013 | Libya     | 0 (0-0)                   |                                | 0 (0-0)                           |                                        | 0 (0-0)                    |                                 | 0 (0-0)                            |                                         | 0 (0-0)              |                           | 0 (0-0)                      | 0 (0-0)                           |
| 2014 | Libya     | 0 (0-0)                   |                                | 0 (0-0)                           |                                        | 0 (0-0)                    |                                 | 0 (0-0)                            |                                         | 0 (0-0)              |                           | 0 (0-0)                      | 0 (0-0)                           |
| 2015 | Libya     | 0 (0-0)                   | 0 (0-0)                        | 0 (0-0)                           | 0 (0-0)                                | 0 (0-0)                    | 0 (0-0)                         | 0 (0-0)                            | 0 (0-0)                                 | 0 (0-0)              | 0 (0-0)                   | 0 (0-0)                      | 0 (0-0)                           |
| 2000 | Lithuania | 5 (4-7)                   |                                | 3 (2-4)                           |                                        | 2 (1-4)                    |                                 | 1 (0-2)                            |                                         | 0 (0-0)              |                           | 0 (0-0)                      | 0 (0-0)                           |
| 2001 | Lithuania | 3 (2-4)                   |                                | 2 (1-2)                           |                                        | 2 (1-4)                    |                                 | 1 (1-2)                            |                                         | 0 (0-0)              |                           | 0 (0-0)                      | 0 (0-0)                           |
| 2002 | Lithuania | 5 (3-6)                   |                                | 3 (2-4)                           |                                        | 2 (1-4)                    |                                 | 1 (1-2)                            |                                         | 0 (0-0)              |                           | 0 (0-0)                      | 0 (0-0)                           |
| 2003 | Lithuania | 3 (2-4)                   |                                | 2 (1-3)                           |                                        | 2 (1-4)                    |                                 | 2 (1-3)                            |                                         | 0 (0-0)              |                           | 0 (0-0)                      | 0 (0-0)                           |
| 2004 | Lithuania | 1 (1-2)                   |                                | 1 (1-1)                           |                                        | 0 (0-0)                    |                                 | 0 (0-0)                            |                                         | 0 (0-0)              |                           | 0 (0-0)                      | 0 (0-0)                           |
| 2005 | Lithuania | 1 (0-1)                   |                                | 0 (0-1)                           |                                        | 0 (0-0)                    |                                 | 0 (0-0)                            |                                         | 0 (0-0)              |                           | 0 (0-0)                      | 0 (0-0)                           |
| 2006 | Lithuania | 0 (0-0)                   |                                | 0 (0-0)                           |                                        | 0 (0-0)                    |                                 | 0 (0-0)                            |                                         | 0 (0-0)              |                           | 0 (0-0)                      | 0 (0-0)                           |
| 2007 | Lithuania | 0 (0-0)                   |                                | 0 (0-0)                           |                                        | 0 (0-0)                    |                                 | 0 (0-0)                            |                                         | 0 (0-0)              |                           | 0 (0-0)                      | 0 (0-0)                           |
| 2008 | Lithuania | 0 (0-0)                   |                                | 0 (0-0)                           |                                        | 0 (0-0)                    |                                 | 0 (0-0)                            |                                         | 0 (0-0)              |                           | 0 (0-0)                      | 0 (0-0)                           |
| 2009 | Lithuania | 0 (0-0)                   |                                | 0 (0-0)                           |                                        | 0 (0-0)                    |                                 | 0 (0-0)                            |                                         | 0 (0-0)              |                           | 0 (0-0)                      | 0 (0-0)                           |
| 2010 | Lithuania | 0 (0-0)                   |                                | 0 (0-0)                           |                                        | 0 (0-0)                    |                                 | 0 (0-0)                            |                                         | 0 (0-0)              |                           | 0 (0-0)                      | 0 (0-0)                           |
| 2011 | Lithuania | 0 (0-0)                   |                                | 0 (0-0)                           |                                        | 0 (0-0)                    |                                 | 0 (0-0)                            |                                         | 0 (0-0)              |                           | 0 (0-0)                      | 0 (0-0)                           |
| 2012 | Lithuania | 0 (0-0)                   |                                | 0 (0-0)                           |                                        | 0 (0-0)                    |                                 | 0 (0-0)                            |                                         | 0 (0-0)              |                           | 0 (0-0)                      | 0 (0-0)                           |
| 2013 | Lithuania | 0 (0-0)                   |                                | 0 (0-0)                           |                                        | 0 (0-0)                    |                                 | 0 (0-0)                            |                                         | 0 (0-0)              |                           | 0 (0-0)                      | 0 (0-0)                           |
| 2014 | Lithuania | 0 (0-0)                   |                                | 0 (0-0)                           |                                        | 0 (0-0)                    |                                 | 0 (0-0)                            |                                         | 0 (0-0)              |                           | 0 (0-0)                      | 0 (0-0)                           |
| 2015 | Lithuania | 0 (0-0)                   | 0 (0-0)                        | 0 (0-0)                           | 0 (0-0)                                | 0 (0-0)                    | 0 (0-0)                         | 0 (0-0)                            | 0 (0-0)                                 | 0 (0-0)              | 0 (0-0)                   | 0 (0-0)                      | 0 (0-0)                           |

Hib = *Haemophilus influenzae* type b; npnm = non-pneumonia, non-meningitis; HIV = deaths only in HIV-infected children; Uncertainty range provided in parentheses.

| Year | Country    | Hib pneumonia deaths<br>(UR) | Hib pneumonia deaths,<br>HIV (UR) | Hib pneumonia<br>mortality rate (UR) | Hib pneumonia<br>mortality rate, HIV (UR) | Hib meningitis deaths<br>(UR) | Hib meningitis deaths,<br>HIV (UR) | Hib meningitis mortality<br>rate (UR) | Hib meningitis mortality<br>rate, HIV (UR) | Hib NPNM deaths (UR) | Hib NPNM deaths, HIV<br>(UR) | Hib NPNM mortality rate<br>(UR) | Hib NPNM mortality<br>rate, HIV (UR) |
|------|------------|------------------------------|-----------------------------------|--------------------------------------|-------------------------------------------|-------------------------------|------------------------------------|---------------------------------------|--------------------------------------------|----------------------|------------------------------|---------------------------------|--------------------------------------|
| 2015 | Lithuania  | 0 (0-0)                      | 0 (0-0)                           | 0 (0-0)                              | 0 (0-0)                                   | 0 (0-0)                       | 0 (0-0)                            | 0 (0-0)                               | 0 (0-0)                                    | 0 (0-0)              | 0 (0-0)                      | 0 (0-0)                         | 0 (0-0)                              |
| 2000 | Luxembourg | 0 (0-0)                      | 0 (0-0)                           | 0 (0-0)                              | 0 (0-0)                                   | 0 (0-0)                       | 0 (0-0)                            | 0 (0-0)                               | 0 (0-0)                                    | 0 (0-0)              | 0 (0-0)                      | 0 (0-0)                         | 0 (0-0)                              |
| 2001 | Luxembourg | 0 (0-0)                      | 0 (0-0)                           | 0 (0-0)                              | 0 (0-0)                                   | 0 (0-0)                       | 0 (0-0)                            | 0 (0-0)                               | 0 (0-0)                                    | 0 (0-0)              | 0 (0-0)                      | 0 (0-0)                         | 0 (0-0)                              |
| 2002 | Luxembourg | 0 (0-0)                      | 0 (0-0)                           | 0 (0-0)                              | 0 (0-0)                                   | 0 (0-0)                       | 0 (0-0)                            | 0 (0-0)                               | 0 (0-0)                                    | 0 (0-0)              | 0 (0-0)                      | 0 (0-0)                         | 0 (0-0)                              |
| 2003 | Luxembourg | 0 (0-0)                      | 0 (0-0)                           | 0 (0-0)                              | 0 (0-0)                                   | 0 (0-0)                       | 0 (0-0)                            | 0 (0-0)                               | 0 (0-0)                                    | 0 (0-0)              | 0 (0-0)                      | 0 (0-0)                         | 0 (0-0)                              |
| 2004 | Luxembourg | 0 (0-0)                      | 0 (0-0)                           | 0 (0-0)                              | 0 (0-0)                                   | 0 (0-0)                       | 0 (0-0)                            | 0 (0-0)                               | 0 (0-0)                                    | 0 (0-0)              | 0 (0-0)                      | 0 (0-0)                         | 0 (0-0)                              |
| 2005 | Luxembourg | 0 (0-0)                      | 0 (0-0)                           | 0 (0-0)                              | 0 (0-0)                                   | 0 (0-0)                       | 0 (0-0)                            | 0 (0-0)                               | 0 (0-0)                                    | 0 (0-0)              | 0 (0-0)                      | 0 (0-0)                         | 0 (0-0)                              |
| 2006 | Luxembourg | 0 (0-0)                      | 0 (0-0)                           | 0 (0-0)                              | 0 (0-0)                                   | 0 (0-0)                       | 0 (0-0)                            | 0 (0-0)                               | 0 (0-0)                                    | 0 (0-0)              | 0 (0-0)                      | 0 (0-0)                         | 0 (0-0)                              |
| 2007 | Luxembourg | 0 (0-0)                      | 0 (0-0)                           | 0 (0-0)                              | 0 (0-0)                                   | 0 (0-0)                       | 0 (0-0)                            | 0 (0-0)                               | 0 (0-0)                                    | 0 (0-0)              | 0 (0-0)                      | 0 (0-0)                         | 0 (0-0)                              |
| 2008 | Luxembourg | 0 (0-0)                      | 0 (0-0)                           | 0 (0-0)                              | 0 (0-0)                                   | 0 (0-0)                       | 0 (0-0)                            | 0 (0-0)                               | 0 (0-0)                                    | 0 (0-0)              | 0 (0-0)                      | 0 (0-0)                         | 0 (0-0)                              |
| 2009 | Luxembourg | 0 (0-0)                      | 0 (0-0)                           | 0 (0-0)                              | 0 (0-0)                                   | 0 (0-0)                       | 0 (0-0)                            | 0 (0-0)                               | 0 (0-0)                                    | 0 (0-0)              | 0 (0-0)                      | 0 (0-0)                         | 0 (0-0)                              |
| 2010 | Luxembourg | 0 (0-0)                      | 0 (0-0)                           | 0 (0-0)                              | 0 (0-0)                                   | 0 (0-0)                       | 0 (0-0)                            | 0 (0-0)                               | 0 (0-0)                                    | 0 (0-0)              | 0 (0-0)                      | 0 (0-0)                         | 0 (0-0)                              |
| 2011 | Luxembourg | 0 (0-0)                      | 0 (0-0)                           | 0 (0-0)                              | 0 (0-0)                                   | 0 (0-0)                       | 0 (0-0)                            | 0 (0-0)                               | 0 (0-0)                                    | 0 (0-0)              | 0 (0-0)                      | 0 (0-0)                         | 0 (0-0)                              |
| 2012 | Luxembourg | 0 (0-0)                      | 0 (0-0)                           | 0 (0-0)                              | 0 (0-0)                                   | 0 (0-0)                       | 0 (0-0)                            | 0 (0-0)                               | 0 (0-0)                                    | 0 (0-0)              | 0 (0-0)                      | 0 (0-0)                         | 0 (0-0)                              |
| 2013 | Luxembourg | 0 (0-0)                      | 0 (0-0)                           | 0 (0-0)                              | 0 (0-0)                                   | 0 (0-0)                       | 0 (0-0)                            | 0 (0-0)                               | 0 (0-0)                                    | 0 (0-0)              | 0 (0-0)                      | 0 (0-0)                         | 0 (0-0)                              |
| 2014 | Luxembourg | 0 (0-0)                      | 0 (0-0)                           | 0 (0-0)                              | 0 (0-0)                                   | 0 (0-0)                       | 0 (0-0)                            | 0 (0-0)                               | 0 (0-0)                                    | 0 (0-0)              | 0 (0-0)                      | 0 (0-0)                         | 0 (0-0)                              |
| 2015 | Luxembourg | 0 (0-0)                      | 0 (0-0)                           | 0 (0-0)                              | 0 (0-0)                                   | 0 (0-0)                       | 0 (0-0)                            | 0 (0-0)                               | 0 (0-0)                                    | 0 (0-0)              | 0 (0-0)                      | 0 (0-0)                         | 0 (0-0)                              |
| 2000 | Madagascar | 2078 (1461-2730)             |                                   | 74 (52-98)                           |                                           | 850 (287-1366)                |                                    | 30 (10-49)                            |                                            | 3 (1-6)              |                              | 0 (0-0)                         | 0 (0-0)                              |
| 2001 | Madagascar | 1998 (1405-2628)             |                                   | 70 (49-92)                           |                                           | 821 (278-1318)                |                                    | 29 (10-46)                            |                                            | 3 (1-5)              |                              | 0 (0-0)                         | 0 (0-0)                              |
| 2002 | Madagascar | 1906 (1341-2504)             |                                   | 65 (46-86)                           |                                           | 789 (268-1266)                |                                    | 27 (9-43)                             |                                            | 3 (1-5)              |                              | 0 (0-0)                         | 0 (0-0)                              |
| 2003 | Madagascar | 1810 (1273-2378)             |                                   | 61 (43-80)                           |                                           | 752 (256-1206)                |                                    | 25 (9-41)                             |                                            | 3 (1-5)              |                              | 0 (0-0)                         | 0 (0-0)                              |
| 2004 | Madagascar | 1709 (1202-2246)             |                                   | 57 (40-75)                           |                                           | 712 (242-1141)                |                                    | 24 (8-38)                             |                                            | 3 (1-5)              |                              | 0 (0-0)                         | 0 (0-0)                              |
| 2005 | Madagascar | 1627 (1144-2137)             |                                   | 53 (37-70)                           |                                           | 676 (227-1086)                |                                    | 22 (7-36)                             |                                            | 3 (1-4)              |                              | 0 (0-0)                         | 0 (0-0)                              |
| 2006 | Madagascar | 1546 (1087-2031)             |                                   | 50 (35-66)                           |                                           | 639 (212-1029)                |                                    | 21 (7-33)                             |                                            | 3 (1-4)              |                              | 0 (0-0)                         | 0 (0-0)                              |
| 2007 | Madagascar | 1482 (1042-1947)             |                                   | 47 (33-62)                           |                                           | 610 (190-1020)                |                                    | 19 (6-32)                             |                                            | 5 (1-9)              |                              | 0 (0-0)                         | 0 (0-0)                              |
| 2008 | Madagascar | 727 (511-955)                |                                   | 23 (16-30)                           |                                           | 299 (87-500)                  |                                    | 9 (3-16)                              |                                            | 2 (1-4)              |                              | 0 (0-0)                         | 0 (0-0)                              |
| 2009 | Madagascar | 145 (102-190)                |                                   | 4 (3-6)                              |                                           | 60 (17-100)                   |                                    | 2 (1-3)                               |                                            | 0 (0-1)              |                              | 0 (0-0)                         | 0 (0-0)                              |
| 2010 | Madagascar | 155 (109-204)                |                                   | 5 (3-6)                              |                                           | 64 (19-107)                   |                                    | 2 (1-3)                               |                                            | 1 (0-1)              |                              | 0 (0-0)                         | 0 (0-0)                              |
| 2011 | Madagascar | 148 (104-194)                |                                   | 4 (3-6)                              |                                           | 61 (18-103)                   |                                    | 2 (1-3)                               |                                            | 0 (0-1)              |                              | 0 (0-0)                         | 0 (0-0)                              |
| 2012 | Madagascar | 152 (107-199)                |                                   | 4 (3-6)                              |                                           | 63 (18-106)                   |                                    | 2 (1-3)                               |                                            | 1 (0-1)              |                              | 0 (0-0)                         | 0 (0-0)                              |
| 2013 | Madagascar | 13 (9-17)                    |                                   | 0 (0-0)                              |                                           | 5 (2-9)                       |                                    | 0 (0-0)                               |                                            | 0 (0-0)              |                              | 0 (0-0)                         | 0 (0-0)                              |
| 2014 | Madagascar | 13 (9-17)                    |                                   | 0 (0-0)                              |                                           | 5 (2-9)                       |                                    | 0 (0-0)                               |                                            | 0 (0-0)              |                              | 0 (0-0)                         | 0 (0-0)                              |
| 2015 | Madagascar | 13 (9-17)                    | 0 (0-0)                           | 0 (0-0)                              | 0 (0-0)                                   | 5 (2-9)                       | 0 (0-0)                            | 0 (0-0)                               | 0 (0-0)                                    | 0 (0-0)              | 0 (0-0)                      | 0 (0-0)                         | 0 (0-0)                              |
| 2000 | Malawi     | 1921 (1351-2525)             |                                   | 96 (67-126)                          |                                           | 1028 (460-1543)               |                                    | 51 (23-77)                            |                                            | 4 (2-6)              |                              | 0 (0-0)                         | 0 (0-0)                              |
| 2001 | Malawi     | 1818 (1279-2389)             |                                   | 89 (62-116)                          |                                           | 975 (441-1458)                |                                    | 47 (21-71)                            |                                            | 4 (2-6)              |                              | 0 (0-0)                         | 0 (0-0)                              |
| 2002 | Malawi     | 604 (425-793)                |                                   | 29 (20-38)                           |                                           | 324 (87-533)                  |                                    | 15 (5-25)                             |                                            | 1 (0-2)              |                              | 0 (0-0)                         | 0 (0-0)                              |
| 2003 | Malawi     | 140 (98-183)                 |                                   | 6 (5-9)                              |                                           | 75 (23-123)                   |                                    | 3 (1-6)                               |                                            | 0 (0-1)              |                              | 0 (0-0)                         | 0 (0-0)                              |
| 2004 | Malawi     | 117 (82-153)                 |                                   | 4 (4-7)                              |                                           | 63 (20-102)                   |                                    | 3 (1-5)                               |                                            | 0 (0-0)              |                              | 0 (0-0)                         | 0 (0-0)                              |
| 2005 | Malawi     | 100 (70-131)                 |                                   | 4 (3-6)                              |                                           | 53 (18-86)                    |                                    | 2 (1-4)                               |                                            | 0 (0-0)              |                              | 0 (0-0)                         | 0 (0-0)                              |
| 2006 | Malawi     | 76 (53-100)                  |                                   | 3 (2-4)                              |                                           | 40 (14-64)                    |                                    | 2 (1-3)                               |                                            | 0 (0-0)              |                              | 0 (0-0)                         | 0 (0-0)                              |
| 2007 | Malawi     | 12 (9-16)                    |                                   | 1 (0-1)                              |                                           | 6 (2-10)                      |                                    | 0 (0-0)                               |                                            | 0 (0-0)              |                              | 0 (0-0)                         | 0 (0-0)                              |
| 2008 | Malawi     | 12 (8-16)                    |                                   | 0 (0-1)                              |                                           | 6 (2-10)                      |                                    | 0 (0-0)                               |                                            | 0 (0-0)              |                              | 0 (0-0)                         | 0 (0-0)                              |
| 2009 | Malawi     | 12 (8-16)                    |                                   | 0 (0-1)                              |                                           | 6 (2-9)                       |                                    | 0 (0-0)                               |                                            | 0 (0-0)              |                              | 0 (0-0)                         | 0 (0-0)                              |
| 2010 | Malawi     | 11 (8-15)                    |                                   | 0 (0-1)                              |                                           | 6 (2-9)                       |                                    | 0 (0-0)                               |                                            | 0 (0-0)              |                              | 0 (0-0)                         | 0 (0-0)                              |
| 2011 | Malawi     | 12 (8-15)                    |                                   | 0 (0-1)                              |                                           | 6 (2-9)                       |                                    | 0 (0-0)                               |                                            | 0 (0-0)              |                              | 0 (0-0)                         | 0 (0-0)                              |
| 2012 | Malawi     | 11 (8-15)                    |                                   | 0 (0-1)                              |                                           | 6 (2-9)                       |                                    | 0 (0-0)                               |                                            | 0 (0-0)              |                              | 0 (0-0)                         | 0 (0-0)                              |
| 2013 | Malawi     | 11 (8-15)                    |                                   | 0 (0-1)                              |                                           | 6 (2-9)                       |                                    | 0 (0-0)                               |                                            | 0 (0-0)              |                              | 0 (0-0)                         | 0 (0-0)                              |
| 2014 | Malawi     | 11 (8-14)                    |                                   | 0 (0-1)                              |                                           | 5 (2-9)                       |                                    | 0 (0-0)                               |                                            | 0 (0-0)              |                              | 0 (0-0)                         | 0 (0-0)                              |
| 2015 | Malawi     | 11 (7-14)                    | 0 (0-1)                           | 0 (0-0)                              | 0 (0-0)                                   | 5 (2-8)                       | 0 (0-0)                            | 0 (0-0)                               | 0 (0-0)                                    | 0 (0-0)              | 0 (0-0)                      | 0 (0-0)                         | 0 (0-0)                              |
| 2000 | Malaysia   | 74 (52-97)                   |                                   | 3 (2-4)                              |                                           | 19 (10-32)                    |                                    | 1 (0-1)                               |                                            | 0 (0-0)              |                              | 0 (0-0)                         | 0 (0-0)                              |
| 2001 | Malaysia   | 65 (45-85)                   |                                   | 2 (2-3)                              |                                           | 17 (8-28)                     |                                    | 1 (0-1)                               |                                            | 0 (0-0)              |                              | 0 (0-0)                         | 0 (0-0)                              |
| 2002 | Malaysia   | 88 (41-76)                   |                                   | 2 (2-3)                              |                                           | 15 (8-25)                     |                                    | 1 (0-1)                               |                                            | 0 (0-0)              |                              | 0 (0-0)                         | 0 (0-0)                              |
| 2003 | Malaysia   | 52 (37-68)                   |                                   | 2 (1-3)                              |                                           | 14 (7-23)                     |                                    | 1 (0-1)                               |                                            | 0 (0-0)              |                              | 0 (0-0)                         | 0 (0-0)                              |
| 2004 | Malaysia   | 14 (10-19)                   |                                   | 1 (0-1)                              |                                           | 5 (3-9)                       |                                    | 0 (0-0)                               |                                            | 0 (0-0)              |                              | 0 (0-0)                         | 0 (0-0)                              |
| 2005 | Malaysia   | 5 (3-6)                      |                                   | 0 (0-0)                              |                                           | 2 (1-3)                       |                                    | 0 (0-0)                               |                                            | 0 (0-0)              |                              | 0 (0-0)                         | 0 (0-0)                              |
| 2006 | Malaysia   | 4 (3-5)                      |                                   | 0 (0-0)                              |                                           | 1 (1-2)                       |                                    | 0 (0-0)                               |                                            | 0 (0-0)              |                              | 0 (0-0)                         | 0 (0-0)                              |
| 2007 | Malaysia   | 3 (2-4)                      |                                   | 0 (0-0)                              |                                           | 1 (1-2)                       |                                    | 0 (0-0)                               |                                            | 0 (0-0)              |                              | 0 (0-0)                         | 0 (0-0)                              |
| 2008 | Malaysia   | 3 (2-4)                      |                                   | 0 (0-0)                              |                                           | 1 (1-2)                       |                                    | 0 (0-0)                               |                                            | 0 (0-0)              |                              | 0 (0-0)                         | 0 (0-0)                              |
| 2009 | Malaysia   | 0 (0-1)                      |                                   | 0 (0-0)                              |                                           | 0 (0-0)                       |                                    | 0 (0-0)                               |                                            | 0 (0-0)              |                              | 0 (0-0)                         | 0 (0-0)                              |
| 2010 | Malaysia   | 0 (0-1)                      |                                   | 0 (0-0)                              |                                           | 0 (0-0)                       |                                    | 0 (0-0)                               |                                            | 0 (0-0)              |                              | 0 (0-0)                         | 0 (0-0)                              |
| 2011 | Malaysia   | 0 (0-1)                      |                                   | 0 (0-0)                              |                                           | 0 (0-0)                       |                                    | 0 (0-0)                               |                                            | 0 (0-0)              |                              | 0 (0-0)                         | 0 (0-0)                              |
| 2012 | Malaysia   | 0 (0-1)                      |                                   | 0 (0-0)                              |                                           | 0 (0-0)                       |                                    | 0 (0-0)                               |                                            | 0 (0-0)              |                              | 0 (0-0)                         | 0 (0-0)                              |
| 2013 | Malaysia   | 0 (0-1)                      |                                   | 0 (0-0)                              |                                           | 0 (0-0)                       |                                    | 0 (0-0)                               |                                            | 0 (0-0)              |                              | 0 (0-0)                         | 0 (0-0)                              |
| 2014 | Malaysia   | 0 (0-0)                      |                                   | 0 (0-0)                              |                                           | 0 (0-0)                       |                                    | 0 (0-0)                               |                                            | 0 (0-0)              |                              | 0 (0-0)                         | 0 (0-0)                              |
| 2015 | Malaysia   | 0 (0-0)                      | 0 (0-0)                           | 0 (0-0)                              | 0 (0-0)                                   | 0 (0-0)                       | 0 (0-0)                            | 0 (0-0)                               | 0 (0-0)                                    | 0 (0-0)              | 0 (0-0)                      | 0 (0-0)                         | 0 (0-0)                              |
| 2000 | Maldives   | 6 (4-7)                      |                                   | 17 (12-22)                           |                                           | 1 (0-2)                       |                                    | 4 (1-6)                               |                                            | 0 (0-0)              |                              | 0 (0-0)                         | 0 (0-0)                              |
| 2001 | Maldives   | 4 (3-6)                      |                                   | 14 (10-19)                           |                                           | 1 (0-2)                       |                                    | 3 (1-5)                               |                                            | 0 (0-0)              |                              | 0 (0-0)                         | 0 (0-0)                              |
| 2002 | Maldives   | 4 (2-5)                      |                                   | 12 (8-15)                            |                                           | 1 (0-1)                       |                                    | 3 (1-4)                               |                                            | 0 (0-0)              |                              | 0 (0-0)                         | 0 (0-0)                              |
| 2003 | Maldives   | 3 (2-4)                      |                                   | 10 (7-13)                            |                                           | 1 (0-1)                       |                                    | 2 (0-4)                               |                                            | 0 (0-0)              |                              | 0 (0-0)                         | 0 (0-0)                              |
| 2004 | Maldives   | 2 (2-3)                      |                                   | 8 (6-11)                             |                                           | 1 (0-1)                       |                                    | 2 (0-3)                               |                                            | 0 (0-0)              |                              | 0 (0-0)                         | 0 (0-0)                              |
| 2005 | Maldives   | 2 (2-3)                      |                                   | 7 (5-10)                             |                                           | 1 (0-1)                       |                                    | 2 (0-3)                               |                                            | 0 (0-0)              |                              | 0 (0-0)                         | 0 (0-0)                              |
| 2006 | Maldives   | 2 (1-3)                      |                                   | 6 (5-8)                              |                                           | 0 (0-1)                       |                                    | 2 (0-3)                               |                                            | 0 (0-0)              |                              | 0 (0-0)                         | 0 (0-0)                              |
| 2007 | Maldives   | 2 (1-2)                      |                                   | 5 (4-7)                              |                                           | 0 (0-1)                       |                                    | 1 (0-2)                               |                                            | 0 (0-0)              |                              | 0 (0-0)                         | 0 (0-0)                              |
| 2008 | Maldives   | 1 (1-2)                      |                                   | 5 (3-6)                              |                                           | 0 (0-1)                       |                                    | 1 (0-2)                               |                                            | 0 (0-0)              |                              | 0 (0-0)                         | 0 (0-0)                              |
| 2009 | Maldives   | 1 (1-2)                      |                                   | 4 (3-5)                              |                                           | 0 (0-1)                       |                                    | 1 (0-2)                               |                                            | 0 (0-0)              |                              | 0 (0-0)                         | 0 (0-0)                              |
| 2010 | Maldives   | 1 (1-2)                      |                                   | 4 (3-5)                              |                                           | 0 (0-0)                       |                                    | 1 (0-2)                               |                                            | 0 (0-0)              |                              | 0 (0-0)                         | 0 (0-0)                              |
| 2011 | Maldives   | 1 (1-1)                      |                                   | 3 (2-4)                              |                                           | 0 (0-0)                       |                                    | 1 (0-1)                               |                                            | 0 (0-0)              |                              | 0 (0-0)                         | 0 (0-0)                              |
| 2012 | Maldives   | 1 (1-1)                      |                                   | 3 (2-3)                              |                                           | 0 (0-0)                       |                                    | 1 (0-1)                               |                                            | 0 (0-0)              |                              | 0 (0-0)                         | 0 (0-0)                              |
| 2013 | Maldives   | 0 (0-0)                      |                                   | 1 (1-1)                              |                                           | 0 (0-0)                       |                                    | 0 (0-1)                               |                                            | 0 (0-0)              |                              | 0 (0-0)                         | 0 (0-0)                              |
| 2014 | Maldives   | 0 (0-0)                      |                                   | 0 (0-0)                              |                                           | 0 (0-0)                       |                                    | 0 (0-0)                               |                                            | 0 (0-0)              |                              | 0 (0-0)                         | 0 (0-0)                              |
| 2015 | Maldives   | 0 (0-0)                      | 0 (0-0)                           | 0 (0-0)                              | 0 (0-0)                                   | 0 (0-0)                       | 0 (0-0)                            | 0 (0-0)                               | 0 (0-0)                                    | 0 (0-0)              | 0 (0-0)                      | 0 (0-0)                         | 0 (0-0)                              |
| 2000 | Mali       | 2288 (1609-3006)             |                                   | 112 (79-147)                         |                                           | 966 (450-1434)                |                                    | 47 (22-70)                            |                                            | 4 (2-6)              |                              | 0 (0-0)                         | 0 (0-0)                              |
| 2001 | Mali       | 2300 (1618-3022)             |                                   | 109 (76-143)                         |                                           | 962 (449-1427)                |                                    | 45 (21-67)                            |                                            | 4 (2-6)              |                              | 0 (0-0)                         | 0 (0-0)                              |
| 2002 | Mali       | 2273 (1599-2986)             |                                   | 104 (73-137)                         |                                           | 943 (441-1399)                |                                    | 43 (20-64)                            |                                            | 4 (2-6)              |                              | 0 (0-0)                         | 0 (0-0)                              |
| 2003 | Mali       | 2176 (1530-2859)             |                                   | 96 (68-127)                          |                                           | 898 (420-1331)                |                                    | 40 (19-59)                            |                                            | 4 (2-5)              |                              | 0 (0-0)                         | 0 (0-0)                              |
| 2004 | Mali       | 2136 (1502-2807)             |                                   | 92 (65-121)                          |                                           | 877 (411-1300)                |                                    | 38 (18-56)                            |                                            | 4 (2-5)              |                              | 0 (0-0)                         | 0 (0-0)                              |
| 2005 | Mali       | 2109 (1483-2771)             |                                   | 88 (62-115)                          |                                           | 862 (405-1277)                |                                    |                                       |                                            |                      |                              |                                 |                                      |

| Year | Country          | Hib pneumonia deaths<br>(UR) | Hib pneumonia deaths,<br>HIV (UR) | Hib pneumonia<br>mortality rate (UR) | Hib pneumonia<br>mortality rate, HIV (UR) | Hib meningitis deaths<br>(UR) | Hib meningitis deaths,<br>HIV (UR) | Hib meningitis mortality<br>rate (UR) | Hib meningitis mortality<br>rate, HIV (UR) | Hib NPNM deaths (UR) | Hib NPNM deaths, HIV<br>(UR) | Hib NPNM mortality rate<br>(UR) | Hib NPNM mortality<br>rate, HIV (UR) |
|------|------------------|------------------------------|-----------------------------------|--------------------------------------|-------------------------------------------|-------------------------------|------------------------------------|---------------------------------------|--------------------------------------------|----------------------|------------------------------|---------------------------------|--------------------------------------|
| 2007 | Malta            | 375 (263-492)                |                                   | 14 (10-19)                           |                                           | 151 (72-224)                  |                                    | 6 (3-9)                               |                                            | 1 (0-1)              |                              | 0 (0-0)                         |                                      |
| 2008 | Malta            | 256 (180-337)                |                                   | 10 (7-12)                            |                                           | 103 (33-168)                  |                                    | 4 (1-6)                               |                                            | 0 (0-1)              |                              | 0 (0-0)                         |                                      |
| 2009 | Malta            | 269 (189-353)                |                                   | 10 (7-13)                            |                                           | 108 (35-175)                  |                                    | 4 (1-6)                               |                                            | 0 (0-1)              |                              | 0 (0-0)                         |                                      |
| 2010 | Malta            | 24 (17-32)                   |                                   | 1 (1-1)                              |                                           | 10 (3-16)                     |                                    | 0 (0-1)                               |                                            | 0 (0-0)              |                              | 0 (0-0)                         |                                      |
| 2011 | Malta            | 23 (16-31)                   |                                   | 1 (1-1)                              |                                           | 9 (3-15)                      |                                    | 0 (0-1)                               |                                            | 0 (0-0)              |                              | 0 (0-0)                         |                                      |
| 2012 | Malta            | 22 (15-28)                   |                                   | 1 (1-1)                              |                                           | 9 (3-14)                      |                                    | 0 (0-0)                               |                                            | 0 (0-0)              |                              | 0 (0-0)                         |                                      |
| 2013 | Malta            | 21 (15-27)                   |                                   | 1 (0-1)                              |                                           | 8 (3-13)                      |                                    | 0 (0-0)                               |                                            | 0 (0-0)              |                              | 0 (0-0)                         |                                      |
| 2014 | Malta            | 20 (14-26)                   | 0 (0-0)                           | 1 (0-1)                              | 0 (0-0)                                   | 8 (3-13)                      | 0 (0-0)                            | 0 (0-0)                               | 0 (0-0)                                    | 0 (0-0)              | 0 (0-0)                      | 0 (0-0)                         | 0 (0-0)                              |
| 2015 | Malta            | 20 (14-26)                   | 0 (0-0)                           | 1 (0-1)                              | 0 (0-0)                                   | 8 (3-13)                      | 0 (0-0)                            | 0 (0-0)                               | 0 (0-0)                                    | 0 (0-0)              | 0 (0-0)                      | 0 (0-0)                         | 0 (0-0)                              |
| 2000 | Malta            | 0 (0-0)                      | 0 (0-0)                           | 0 (0-0)                              | 0 (0-0)                                   | 0 (0-0)                       | 0 (0-0)                            | 0 (0-0)                               | 0 (0-0)                                    | 0 (0-0)              | 0 (0-0)                      | 0 (0-0)                         | 0 (0-0)                              |
| 2001 | Malta            | 0 (0-0)                      | 0 (0-0)                           | 0 (0-0)                              | 0 (0-0)                                   | 0 (0-0)                       | 0 (0-0)                            | 0 (0-0)                               | 0 (0-0)                                    | 0 (0-0)              | 0 (0-0)                      | 0 (0-0)                         | 0 (0-0)                              |
| 2002 | Malta            | 0 (0-0)                      | 0 (0-0)                           | 0 (0-0)                              | 0 (0-0)                                   | 0 (0-0)                       | 0 (0-0)                            | 0 (0-0)                               | 0 (0-0)                                    | 0 (0-0)              | 0 (0-0)                      | 0 (0-0)                         | 0 (0-0)                              |
| 2003 | Malta            | 0 (0-0)                      | 0 (0-0)                           | 0 (0-0)                              | 0 (0-0)                                   | 0 (0-0)                       | 0 (0-0)                            | 0 (0-0)                               | 0 (0-0)                                    | 0 (0-0)              | 0 (0-0)                      | 0 (0-0)                         | 0 (0-0)                              |
| 2004 | Malta            | 0 (0-0)                      | 0 (0-0)                           | 0 (0-0)                              | 0 (0-0)                                   | 0 (0-0)                       | 0 (0-0)                            | 0 (0-0)                               | 0 (0-0)                                    | 0 (0-0)              | 0 (0-0)                      | 0 (0-0)                         | 0 (0-0)                              |
| 2005 | Malta            | 0 (0-0)                      | 0 (0-0)                           | 0 (0-0)                              | 0 (0-0)                                   | 0 (0-0)                       | 0 (0-0)                            | 0 (0-0)                               | 0 (0-0)                                    | 0 (0-0)              | 0 (0-0)                      | 0 (0-0)                         | 0 (0-0)                              |
| 2006 | Malta            | 0 (0-0)                      | 0 (0-0)                           | 0 (0-0)                              | 0 (0-0)                                   | 0 (0-0)                       | 0 (0-0)                            | 0 (0-0)                               | 0 (0-0)                                    | 0 (0-0)              | 0 (0-0)                      | 0 (0-0)                         | 0 (0-0)                              |
| 2007 | Malta            | 0 (0-0)                      | 0 (0-0)                           | 0 (0-0)                              | 0 (0-0)                                   | 0 (0-0)                       | 0 (0-0)                            | 0 (0-0)                               | 0 (0-0)                                    | 0 (0-0)              | 0 (0-0)                      | 0 (0-0)                         | 0 (0-0)                              |
| 2008 | Malta            | 0 (0-0)                      | 0 (0-0)                           | 0 (0-0)                              | 0 (0-0)                                   | 0 (0-0)                       | 0 (0-0)                            | 0 (0-0)                               | 0 (0-0)                                    | 0 (0-0)              | 0 (0-0)                      | 0 (0-0)                         | 0 (0-0)                              |
| 2009 | Malta            | 0 (0-0)                      | 0 (0-0)                           | 0 (0-0)                              | 0 (0-0)                                   | 0 (0-0)                       | 0 (0-0)                            | 0 (0-0)                               | 0 (0-0)                                    | 0 (0-0)              | 0 (0-0)                      | 0 (0-0)                         | 0 (0-0)                              |
| 2010 | Malta            | 0 (0-0)                      | 0 (0-0)                           | 0 (0-0)                              | 0 (0-0)                                   | 0 (0-0)                       | 0 (0-0)                            | 0 (0-0)                               | 0 (0-0)                                    | 0 (0-0)              | 0 (0-0)                      | 0 (0-0)                         | 0 (0-0)                              |
| 2011 | Malta            | 0 (0-0)                      | 0 (0-0)                           | 0 (0-0)                              | 0 (0-0)                                   | 0 (0-0)                       | 0 (0-0)                            | 0 (0-0)                               | 0 (0-0)                                    | 0 (0-0)              | 0 (0-0)                      | 0 (0-0)                         | 0 (0-0)                              |
| 2012 | Malta            | 0 (0-0)                      | 0 (0-0)                           | 0 (0-0)                              | 0 (0-0)                                   | 0 (0-0)                       | 0 (0-0)                            | 0 (0-0)                               | 0 (0-0)                                    | 0 (0-0)              | 0 (0-0)                      | 0 (0-0)                         | 0 (0-0)                              |
| 2013 | Malta            | 0 (0-0)                      | 0 (0-0)                           | 0 (0-0)                              | 0 (0-0)                                   | 0 (0-0)                       | 0 (0-0)                            | 0 (0-0)                               | 0 (0-0)                                    | 0 (0-0)              | 0 (0-0)                      | 0 (0-0)                         | 0 (0-0)                              |
| 2014 | Malta            | 0 (0-0)                      | 0 (0-0)                           | 0 (0-0)                              | 0 (0-0)                                   | 0 (0-0)                       | 0 (0-0)                            | 0 (0-0)                               | 0 (0-0)                                    | 0 (0-0)              | 0 (0-0)                      | 0 (0-0)                         | 0 (0-0)                              |
| 2015 | Malta            | 0 (0-0)                      | 0 (0-0)                           | 0 (0-0)                              | 0 (0-0)                                   | 0 (0-0)                       | 0 (0-0)                            | 0 (0-0)                               | 0 (0-0)                                    | 0 (0-0)              | 0 (0-0)                      | 0 (0-0)                         | 0 (0-0)                              |
| 2000 | Marshall Islands | 2 (1-2)                      |                                   | 14 (10-18)                           |                                           | 1 (0-1)                       |                                    | 6 (3-8)                               |                                            | 0 (0-0)              |                              | 0 (0-0)                         |                                      |
| 2001 | Marshall Islands | 0 (0-1)                      |                                   | 4 (3-5)                              |                                           | 0 (0-0)                       |                                    | 2 (1-2)                               |                                            | 0 (0-0)              |                              | 0 (0-0)                         |                                      |
| 2002 | Marshall Islands | 0 (0-0)                      |                                   | 2 (2-3)                              |                                           | 0 (0-0)                       |                                    | 1 (0-1)                               |                                            | 0 (0-0)              |                              | 0 (0-0)                         |                                      |
| 2003 | Marshall Islands | 0 (0-0)                      |                                   | 3 (2-4)                              |                                           | 0 (0-0)                       |                                    | 1 (1-2)                               |                                            | 0 (0-0)              |                              | 0 (0-0)                         |                                      |
| 2004 | Marshall Islands | 0 (0-0)                      |                                   | 4 (3-5)                              |                                           | 0 (0-0)                       |                                    | 2 (1-2)                               |                                            | 0 (0-0)              |                              | 0 (0-0)                         |                                      |
| 2005 | Marshall Islands | 0 (0-0)                      |                                   | 0 (0-0)                              |                                           | 0 (0-0)                       |                                    | 0 (0-0)                               |                                            | 0 (0-0)              |                              | 0 (0-0)                         |                                      |
| 2006 | Marshall Islands | 0 (0-0)                      |                                   | 3 (2-4)                              |                                           | 0 (0-0)                       |                                    | 1 (1-2)                               |                                            | 0 (0-0)              |                              | 0 (0-0)                         |                                      |
| 2007 | Marshall Islands | 0 (0-0)                      |                                   | 0 (0-0)                              |                                           | 0 (0-0)                       |                                    | 0 (0-0)                               |                                            | 0 (0-0)              |                              | 0 (0-0)                         |                                      |
| 2008 | Marshall Islands | 0 (0-0)                      |                                   | 0 (0-0)                              |                                           | 0 (0-0)                       |                                    | 0 (0-0)                               |                                            | 0 (0-0)              |                              | 0 (0-0)                         |                                      |
| 2009 | Marshall Islands | 0 (0-0)                      |                                   | 0 (0-0)                              |                                           | 0 (0-0)                       |                                    | 0 (0-0)                               |                                            | 0 (0-0)              |                              | 0 (0-0)                         |                                      |
| 2010 | Marshall Islands | 0 (0-0)                      |                                   | 0 (0-0)                              |                                           | 0 (0-0)                       |                                    | 0 (0-0)                               |                                            | 0 (0-0)              |                              | 0 (0-0)                         |                                      |
| 2011 | Marshall Islands | 0 (0-0)                      |                                   | 0 (0-0)                              |                                           | 0 (0-0)                       |                                    | 0 (0-0)                               |                                            | 0 (0-0)              |                              | 0 (0-0)                         |                                      |
| 2012 | Marshall Islands | 0 (0-0)                      |                                   | 0 (0-0)                              |                                           | 0 (0-0)                       |                                    | 0 (0-0)                               |                                            | 0 (0-0)              |                              | 0 (0-0)                         |                                      |
| 2013 | Marshall Islands | 0 (0-0)                      |                                   | 0 (0-0)                              |                                           | 0 (0-0)                       |                                    | 0 (0-0)                               |                                            | 0 (0-0)              |                              | 0 (0-0)                         |                                      |
| 2014 | Marshall Islands | 0 (0-0)                      |                                   | 3 (2-4)                              |                                           | 0 (0-0)                       |                                    | 1 (1-2)                               |                                            | 0 (0-0)              |                              | 0 (0-0)                         |                                      |
| 2015 | Marshall Islands | 0 (0-0)                      | 0 (0-0)                           | 0 (0-0)                              | 0 (0-0)                                   | 0 (0-0)                       | 0 (0-0)                            | 0 (0-0)                               | 0 (0-0)                                    | 0 (0-0)              | 0 (0-0)                      | 0 (0-0)                         | 0 (0-0)                              |
| 2000 | Mauritania       | 289 (203-380)                |                                   | 66 (46-87)                           |                                           | 100 (32-161)                  |                                    | 23 (7-37)                             |                                            | 0 (0-1)              |                              | 0 (0-0)                         |                                      |
| 2001 | Mauritania       | 300 (211-395)                |                                   | 67 (47-88)                           |                                           | 104 (33-168)                  |                                    | 23 (7-37)                             |                                            | 0 (0-1)              |                              | 0 (0-0)                         |                                      |
| 2002 | Mauritania       | 312 (219-409)                |                                   | 68 (48-89)                           |                                           | 108 (35-175)                  |                                    | 23 (8-38)                             |                                            | 0 (0-1)              |                              | 0 (0-0)                         |                                      |
| 2003 | Mauritania       | 321 (226-421)                |                                   | 68 (48-89)                           |                                           | 111 (36-179)                  |                                    | 23 (8-38)                             |                                            | 0 (0-1)              |                              | 0 (0-0)                         |                                      |
| 2004 | Mauritania       | 327 (230-430)                |                                   | 68 (48-89)                           |                                           | 112 (37-181)                  |                                    | 23 (8-38)                             |                                            | 0 (0-1)              |                              | 0 (0-0)                         |                                      |
| 2005 | Mauritania       | 332 (233-436)                |                                   | 67 (47-88)                           |                                           | 113 (37-182)                  |                                    | 23 (8-37)                             |                                            | 0 (0-1)              |                              | 0 (0-0)                         |                                      |
| 2006 | Mauritania       | 335 (235-440)                |                                   | 66 (47-87)                           |                                           | 113 (37-183)                  |                                    | 22 (7-36)                             |                                            | 0 (0-1)              |                              | 0 (0-0)                         |                                      |
| 2007 | Mauritania       | 337 (237-443)                |                                   | 65 (46-86)                           |                                           | 114 (38-183)                  |                                    | 22 (7-36)                             |                                            | 0 (0-1)              |                              | 0 (0-0)                         |                                      |
| 2008 | Mauritania       | 337 (237-443)                |                                   | 64 (45-84)                           |                                           | 114 (38-184)                  |                                    | 22 (7-35)                             |                                            | 0 (0-1)              |                              | 0 (0-0)                         |                                      |
| 2009 | Mauritania       | 121 (85-159)                 |                                   | 23 (16-30)                           |                                           | 41 (14-66)                    |                                    | 8 (3-12)                              |                                            | 0 (0-0)              |                              | 0 (0-0)                         |                                      |
| 2010 | Mauritania       | 42 (30-56)                   |                                   | 8 (5-10)                             |                                           | 14 (5-23)                     |                                    | 3 (1-4)                               |                                            | 0 (0-0)              |                              | 0 (0-0)                         |                                      |
| 2011 | Mauritania       | 36 (25-47)                   |                                   | 6 (5-9)                              |                                           | 12 (4-20)                     |                                    | 2 (1-4)                               |                                            | 0 (0-0)              |                              | 0 (0-0)                         |                                      |
| 2012 | Mauritania       | 33 (23-43)                   |                                   | 6 (4-8)                              |                                           | 11 (4-18)                     |                                    | 2 (1-3)                               |                                            | 0 (0-0)              |                              | 0 (0-0)                         |                                      |
| 2013 | Mauritania       | 33 (23-43)                   |                                   | 6 (4-8)                              |                                           | 11 (4-18)                     |                                    | 2 (1-3)                               |                                            | 0 (0-0)              |                              | 0 (0-0)                         |                                      |
| 2014 | Mauritania       | 3 (2-4)                      | 0 (0-0)                           | 1 (0-1)                              | 0 (0-0)                                   | 1 (0-2)                       | 0 (0-0)                            | 0 (0-0)                               | 0 (0-0)                                    | 0 (0-0)              | 0 (0-0)                      | 0 (0-0)                         | 0 (0-0)                              |
| 2015 | Mauritania       | 3 (2-4)                      | 0 (0-0)                           | 1 (0-1)                              | 0 (0-0)                                   | 1 (0-2)                       | 0 (0-0)                            | 0 (0-0)                               | 0 (0-0)                                    | 0 (0-0)              | 0 (0-0)                      | 0 (0-0)                         | 0 (0-0)                              |
| 2000 | Mauritius        | 2 (1-2)                      |                                   | 2 (1-2)                              |                                           | 1 (1-2)                       |                                    | 1 (1-2)                               |                                            | 0 (0-0)              |                              | 0 (0-0)                         |                                      |
| 2001 | Mauritius        | 3 (2-4)                      |                                   | 3 (2-4)                              |                                           | 1 (1-2)                       |                                    | 1 (1-2)                               |                                            | 0 (0-0)              |                              | 0 (0-0)                         |                                      |
| 2002 | Mauritius        | 2 (2-3)                      |                                   | 2 (2-3)                              |                                           | 0 (0-1)                       |                                    | 1 (0-1)                               |                                            | 0 (0-0)              |                              | 0 (0-0)                         |                                      |
| 2003 | Mauritius        | 3 (2-5)                      |                                   | 4 (3-5)                              |                                           | 1 (0-1)                       |                                    | 1 (0-1)                               |                                            | 0 (0-0)              |                              | 0 (0-0)                         |                                      |
| 2004 | Mauritius        | 4 (3-5)                      |                                   | 4 (3-5)                              |                                           | 1 (0-1)                       |                                    | 1 (0-1)                               |                                            | 0 (0-0)              |                              | 0 (0-0)                         |                                      |
| 2005 | Mauritius        | 3 (2-3)                      |                                   | 3 (2-4)                              |                                           | 1 (0-1)                       |                                    | 1 (0-1)                               |                                            | 0 (0-0)              |                              | 0 (0-0)                         |                                      |
| 2006 | Mauritius        | 1 (0-1)                      |                                   | 1 (0-1)                              |                                           | 0 (0-1)                       |                                    | 0 (0-0)                               |                                            | 0 (0-0)              |                              | 0 (0-0)                         |                                      |
| 2007 | Mauritius        | 0 (0-0)                      |                                   | 0 (0-0)                              |                                           | 0 (0-0)                       |                                    | 0 (0-0)                               |                                            | 0 (0-0)              |                              | 0 (0-0)                         |                                      |
| 2008 | Mauritius        | 0 (0-0)                      |                                   | 0 (0-0)                              |                                           | 0 (0-0)                       |                                    | 0 (0-0)                               |                                            | 0 (0-0)              |                              | 0 (0-0)                         |                                      |
| 2009 | Mauritius        | 0 (0-0)                      |                                   | 0 (0-0)                              |                                           | 0 (0-0)                       |                                    | 0 (0-0)                               |                                            | 0 (0-0)              |                              | 0 (0-0)                         |                                      |
| 2010 | Mauritius        | 0 (0-0)                      |                                   | 0 (0-0)                              |                                           | 0 (0-0)                       |                                    | 0 (0-0)                               |                                            | 0 (0-0)              |                              | 0 (0-0)                         |                                      |
| 2011 | Mauritius        | 0 (0-0)                      |                                   | 0 (0-0)                              |                                           | 0 (0-0)                       |                                    | 0 (0-0)                               |                                            | 0 (0-0)              |                              | 0 (0-0)                         |                                      |
| 2012 | Mauritius        | 0 (0-0)                      |                                   | 0 (0-0)                              |                                           | 0 (0-0)                       |                                    | 0 (0-0)                               |                                            | 0 (0-0)              |                              | 0 (0-0)                         |                                      |
| 2013 | Mauritius        | 0 (0-0)                      |                                   | 0 (0-0)                              |                                           | 0 (0-0)                       |                                    | 0 (0-0)                               |                                            | 0 (0-0)              |                              | 0 (0-0)                         |                                      |
| 2014 | Mauritius        | 0 (0-0)                      |                                   | 0 (0-0)                              |                                           | 0 (0-0)                       |                                    | 0 (0-0)                               |                                            | 0 (0-0)              |                              | 0 (0-0)                         |                                      |
| 2015 | Mauritius        | 0 (0-0)                      | 0 (0-0)                           | 0 (0-0)                              | 0 (0-0)                                   | 0 (0-0)                       | 0 (0-0)                            | 0 (0-0)                               | 0 (0-0)                                    | 0 (0-0)              | 0 (0-0)                      | 0 (0-0)                         | 0 (0-0)                              |
| 2000 | Mexico           | 309 (217-406)                |                                   | 3 (2-3)                              |                                           | 54 (23-95)                    |                                    | 0 (0-1)                               |                                            | 0 (0-1)              |                              | 0 (0-0)                         |                                      |
| 2001 | Mexico           | 129 (91-169)                 |                                   | 1 (1-1)                              |                                           | 20 (9-35)                     |                                    | 0 (0-0)                               |                                            | 0 (0-0)              |                              | 0 (0-0)                         |                                      |
| 2002 | Mexico           | 132 (93-173)                 |                                   | 1 (1-1)                              |                                           | 18 (8-31)                     |                                    | 0 (0-0)                               |                                            | 0 (0-0)              |                              | 0 (0-0)                         |                                      |
| 2003 | Mexico           | 110 (78-145)                 |                                   | 1 (1-1)                              |                                           | 18 (8-31)                     |                                    | 0 (0-0)                               |                                            | 0 (0-0)              |                              | 0 (0-0)                         |                                      |
| 2004 | Mexico           | 111 (78-146)                 |                                   | 1 (1-1)                              |                                           | 16 (7-29)                     |                                    | 0 (0-0)                               |                                            | 0 (0-0)              |                              | 0 (0-0)                         |                                      |
| 2005 | Mexico           | 14 (10-18)                   |                                   | 0 (0-0)                              |                                           | 2 (1-4)                       |                                    | 0 (0-0)                               |                                            | 0 (0-0)              |                              | 0 (0-0)                         |                                      |
| 2006 | Mexico           | 13 (9-17)                    |                                   | 0 (0-0)                              |                                           | 2 (1-4)                       |                                    | 0 (0-0)                               |                                            | 0 (0-0)              |                              | 0 (0-0)                         |                                      |
| 2007 | Mexico           | 12 (9-16)                    |                                   | 0 (0-0)                              |                                           | 2 (1-4)                       |                                    | 0 (0-0)                               |                                            | 0 (0-0)              |                              | 0 (0-0)                         |                                      |
| 2008 | Mexico           | 12 (8-15)                    |                                   | 0 (0-0)                              |                                           | 2 (1-3)                       |                                    | 0 (0-0)                               |                                            | 0 (0-0)              |                              | 0 (0-0)                         |                                      |
| 2009 | Mexico           | 12 (8-15)                    |                                   | 0 (0-0)                              |                                           | 1 (1-3)                       |                                    | 0 (0-0)                               |                                            | 0 (0-0)              |                              | 0 (0-0)                         |                                      |
| 2010 | Mexico           | 11 (8-14)                    |                                   | 0 (0-0)                              |                                           | 2 (1-3)                       |                                    | 0 (0-0)                               |                                            | 0 (0-0)              |                              | 0 (0-0)                         |                                      |
| 2011 | Mexico           | 10 (7-13)                    |                                   | 0 (0-0)                              |                                           | 2 (1-3)                       |                                    | 0 (0-0)                               |                                            | 0 (0-0)              |                              | 0 (0-0)                         |                                      |
| 2012 | Mexico           | 9 (6-11)                     |                                   | 0 (0-0)                              |                                           | 1 (1-2)                       |                                    | 0 (0-0)                               |                                            | 0 (0-0)              |                              | 0 (0-0)                         |                                      |
| 2013 | Mexico           | 8 (6-10)                     |                                   | 0 (0-0)                              |                                           | 1 (1-2)                       |                                    | 0 (0-0)                               |                                            | 0 (0-0)              |                              | 0 (0-0)                         |                                      |
| 2014 | Mexico           | 8 (6-10)                     |                                   | 0 (0-0)                              |                                           | 1 (1-2)                       |                                    | 0 (0-0)                               |                                            | 0 (0-0)              |                              | 0 (0-0)                         |                                      |

Hib = *Haemophilus influenzae* type b; npnm = non-pneumonia, non-meningitis; HIV = deaths only in HIV-infected children; Uncertainty range provided in parentheses.

| Year | Country                          | Hib pneumonia deaths (UR) | Hib pneumonia deaths, HIV (UR) | Hib pneumonia mortality rate (UR) | Hib pneumonia mortality rate, HIV (UR) | Hib meningitis deaths (UR) | Hib meningitis deaths, HIV (UR) | Hib meningitis mortality rate (UR) | Hib meningitis mortality rate, HIV (UR) | Hib NPNM deaths (UR) | Hib NPNM deaths, HIV (UR) | Hib NPNM mortality rate (UR) | Hib NPNM mortality rate, HIV (UR) |
|------|----------------------------------|---------------------------|--------------------------------|-----------------------------------|----------------------------------------|----------------------------|---------------------------------|------------------------------------|-----------------------------------------|----------------------|---------------------------|------------------------------|-----------------------------------|
| 2015 | Mexico                           | 8 (5-10)                  | 0 (0-0)                        | 0 (0-0)                           | 0 (0-0)                                | 1 (1-2)                    | 0 (0-0)                         | 0 (0-0)                            | 0 (0-0)                                 | 0 (0-0)              | 0 (0-0)                   | 0 (0-0)                      | 0 (0-0)                           |
| 2000 | Micronesia (Federated States of) | 0 (0-1)                   |                                |                                   | 3 (2-4)                                | 0 (0-0)                    |                                 |                                    | 2 (1-2)                                 | 0 (0-0)              |                           | 0 (0-0)                      | 0 (0-0)                           |
| 2001 | Micronesia (Federated States of) | 0 (0-1)                   |                                |                                   | 3 (2-4)                                | 0 (0-0)                    |                                 |                                    | 2 (1-2)                                 | 0 (0-0)              |                           | 0 (0-0)                      | 0 (0-0)                           |
| 2002 | Micronesia (Federated States of) | 0 (0-1)                   |                                |                                   | 3 (2-4)                                | 0 (0-0)                    |                                 |                                    | 2 (1-2)                                 | 0 (0-0)              |                           | 0 (0-0)                      | 0 (0-0)                           |
| 2003 | Micronesia (Federated States of) | 0 (0-1)                   |                                |                                   | 3 (2-4)                                | 0 (0-0)                    |                                 |                                    | 2 (1-2)                                 | 0 (0-0)              |                           | 0 (0-0)                      | 0 (0-0)                           |
| 2004 | Micronesia (Federated States of) | 0 (0-1)                   |                                |                                   | 3 (2-4)                                | 0 (0-0)                    |                                 |                                    | 2 (1-2)                                 | 0 (0-0)              |                           | 0 (0-0)                      | 0 (0-0)                           |
| 2005 | Micronesia (Federated States of) | 0 (0-0)                   |                                |                                   | 0 (0-0)                                | 0 (0-0)                    |                                 |                                    | 0 (0-0)                                 | 0 (0-0)              |                           | 0 (0-0)                      | 0 (0-0)                           |
| 2006 | Micronesia (Federated States of) | 0 (0-1)                   |                                |                                   | 3 (2-4)                                | 0 (0-0)                    |                                 |                                    | 2 (1-2)                                 | 0 (0-0)              |                           | 0 (0-0)                      | 0 (0-0)                           |
| 2007 | Micronesia (Federated States of) | 0 (0-0)                   |                                |                                   | 0 (0-0)                                | 0 (0-0)                    |                                 |                                    | 0 (0-0)                                 | 0 (0-0)              |                           | 0 (0-0)                      | 0 (0-0)                           |
| 2008 | Micronesia (Federated States of) | 0 (0-0)                   |                                |                                   | 0 (0-0)                                | 0 (0-0)                    |                                 |                                    | 0 (0-0)                                 | 0 (0-0)              |                           | 0 (0-0)                      | 0 (0-0)                           |
| 2009 | Micronesia (Federated States of) | 0 (0-0)                   |                                |                                   | 0 (0-0)                                | 0 (0-0)                    |                                 |                                    | 0 (0-0)                                 | 0 (0-0)              |                           | 0 (0-0)                      | 0 (0-0)                           |
| 2010 | Micronesia (Federated States of) | 0 (0-0)                   |                                |                                   | 0 (0-0)                                | 0 (0-0)                    |                                 |                                    | 0 (0-0)                                 | 0 (0-0)              |                           | 0 (0-0)                      | 0 (0-0)                           |
| 2011 | Micronesia (Federated States of) | 0 (0-0)                   |                                |                                   | 0 (0-0)                                | 0 (0-0)                    |                                 |                                    | 0 (0-0)                                 | 0 (0-0)              |                           | 0 (0-0)                      | 0 (0-0)                           |
| 2012 | Micronesia (Federated States of) | 0 (0-0)                   |                                |                                   | 0 (0-0)                                | 0 (0-0)                    |                                 |                                    | 0 (0-0)                                 | 0 (0-0)              |                           | 0 (0-0)                      | 0 (0-0)                           |
| 2013 | Micronesia (Federated States of) | 0 (0-0)                   |                                |                                   | 0 (0-0)                                | 0 (0-0)                    |                                 |                                    | 0 (0-0)                                 | 0 (0-0)              |                           | 0 (0-0)                      | 0 (0-0)                           |
| 2014 | Micronesia (Federated States of) | 0 (0-0)                   |                                |                                   | 2 (2-3)                                | 0 (0-0)                    |                                 |                                    | 1 (1-1)                                 | 0 (0-0)              |                           | 0 (0-0)                      | 0 (0-0)                           |
| 2015 | Micronesia (Federated States of) | 0 (0-0)                   | 0 (0-0)                        |                                   | 3 (2-3)                                | 0 (0-0)                    | 0 (0-0)                         |                                    | 1 (1-2)                                 | 0 (0-0)              | 0 (0-0)                   | 0 (0-0)                      | 0 (0-0)                           |
| 2000 | Monaco                           | 0 (0-0)                   |                                |                                   | 0 (0-0)                                | 0 (0-0)                    |                                 |                                    | 0 (0-0)                                 | 0 (0-0)              |                           | 0 (0-0)                      | 0 (0-0)                           |
| 2001 | Monaco                           | 0 (0-0)                   |                                |                                   | 0 (0-0)                                | 0 (0-0)                    |                                 |                                    | 0 (0-0)                                 | 0 (0-0)              |                           | 0 (0-0)                      | 0 (0-0)                           |
| 2002 | Monaco                           | 0 (0-0)                   |                                |                                   | 0 (0-0)                                | 0 (0-0)                    |                                 |                                    | 0 (0-0)                                 | 0 (0-0)              |                           | 0 (0-0)                      | 0 (0-0)                           |
| 2003 | Monaco                           | 0 (0-0)                   |                                |                                   | 0 (0-0)                                | 0 (0-0)                    |                                 |                                    | 0 (0-0)                                 | 0 (0-0)              |                           | 0 (0-0)                      | 0 (0-0)                           |
| 2004 | Monaco                           | 0 (0-0)                   |                                |                                   | 0 (0-0)                                | 0 (0-0)                    |                                 |                                    | 0 (0-0)                                 | 0 (0-0)              |                           | 0 (0-0)                      | 0 (0-0)                           |
| 2005 | Monaco                           | 0 (0-0)                   |                                |                                   | 0 (0-0)                                | 0 (0-0)                    |                                 |                                    | 0 (0-0)                                 | 0 (0-0)              |                           | 0 (0-0)                      | 0 (0-0)                           |
| 2006 | Monaco                           | 0 (0-0)                   |                                |                                   | 0 (0-0)                                | 0 (0-0)                    |                                 |                                    | 0 (0-0)                                 | 0 (0-0)              |                           | 0 (0-0)                      | 0 (0-0)                           |
| 2007 | Monaco                           | 0 (0-0)                   |                                |                                   | 0 (0-0)                                | 0 (0-0)                    |                                 |                                    | 0 (0-0)                                 | 0 (0-0)              |                           | 0 (0-0)                      | 0 (0-0)                           |
| 2008 | Monaco                           | 0 (0-0)                   |                                |                                   | 0 (0-0)                                | 0 (0-0)                    |                                 |                                    | 0 (0-0)                                 | 0 (0-0)              |                           | 0 (0-0)                      | 0 (0-0)                           |
| 2009 | Monaco                           | 0 (0-0)                   |                                |                                   | 0 (0-0)                                | 0 (0-0)                    |                                 |                                    | 0 (0-0)                                 | 0 (0-0)              |                           | 0 (0-0)                      | 0 (0-0)                           |
| 2010 | Monaco                           | 0 (0-0)                   |                                |                                   | 0 (0-0)                                | 0 (0-0)                    |                                 |                                    | 0 (0-0)                                 | 0 (0-0)              |                           | 0 (0-0)                      | 0 (0-0)                           |
| 2011 | Monaco                           | 0 (0-0)                   |                                |                                   | 0 (0-0)                                | 0 (0-0)                    |                                 |                                    | 0 (0-0)                                 | 0 (0-0)              |                           | 0 (0-0)                      | 0 (0-0)                           |
| 2012 | Monaco                           | 0 (0-0)                   |                                |                                   | 0 (0-0)                                | 0 (0-0)                    |                                 |                                    | 0 (0-0)                                 | 0 (0-0)              |                           | 0 (0-0)                      | 0 (0-0)                           |
| 2013 | Monaco                           | 0 (0-0)                   |                                |                                   | 0 (0-0)                                | 0 (0-0)                    |                                 |                                    | 0 (0-0)                                 | 0 (0-0)              |                           | 0 (0-0)                      | 0 (0-0)                           |
| 2014 | Monaco                           | 0 (0-0)                   |                                |                                   | 0 (0-0)                                | 0 (0-0)                    |                                 |                                    | 0 (0-0)                                 | 0 (0-0)              |                           | 0 (0-0)                      | 0 (0-0)                           |
| 2015 | Monaco                           | 0 (0-0)                   |                                |                                   | 0 (0-0)                                | 0 (0-0)                    |                                 |                                    | 0 (0-0)                                 | 0 (0-0)              |                           | 0 (0-0)                      | 0 (0-0)                           |
| 2000 | Mongolia                         | 89 (62-116)               |                                |                                   | 39 (27-51)                             | 28 (12-43)                 |                                 |                                    | 12 (5-19)                               | 0 (0-0)              |                           | 0 (0-0)                      | 0 (0-0)                           |
| 2001 | Mongolia                         | 80 (56-105)               |                                |                                   | 35 (25-46)                             | 25 (10-39)                 |                                 |                                    | 11 (5-17)                               | 0 (0-0)              |                           | 0 (0-0)                      | 0 (0-0)                           |
| 2002 | Mongolia                         | 71 (50-93)                |                                |                                   | 32 (23-42)                             | 22 (9-35)                  |                                 |                                    | 10 (4-16)                               | 0 (0-0)              |                           | 0 (0-0)                      | 0 (0-0)                           |
| 2003 | Mongolia                         | 65 (46-86)                |                                |                                   | 30 (21-39)                             | 20 (8-32)                  |                                 |                                    | 9 (4-15)                                | 0 (0-0)              |                           | 0 (0-0)                      | 0 (0-0)                           |
| 2004 | Mongolia                         | 60 (42-79)                |                                |                                   | 28 (20-37)                             | 18 (7-29)                  |                                 |                                    | 8 (3-13)                                | 0 (0-0)              |                           | 0 (0-0)                      | 0 (0-0)                           |
| 2005 | Mongolia                         | 45 (32-59)                |                                |                                   | 21 (14-27)                             | 13 (5-21)                  |                                 |                                    | 6 (2-10)                                | 0 (0-0)              |                           | 0 (0-0)                      | 0 (0-0)                           |
| 2006 | Mongolia                         | 7 (5-10)                  |                                |                                   | 3 (2-4)                                | 2 (1-3)                    |                                 |                                    | 1 (0-2)                                 | 0 (0-0)              |                           | 0 (0-0)                      | 0 (0-0)                           |
| 2007 | Mongolia                         | 5 (4-7)                   |                                |                                   | 2 (2-3)                                | 2 (1-2)                    |                                 |                                    | 1 (0-1)                                 | 0 (0-0)              |                           | 0 (0-0)                      | 0 (0-0)                           |
| 2008 | Mongolia                         | 4 (3-5)                   |                                |                                   | 1 (1-2)                                | 1 (0-2)                    |                                 |                                    | 0 (0-1)                                 | 0 (0-0)              |                           | 0 (0-0)                      | 0 (0-0)                           |
| 2009 | Mongolia                         | 4 (3-5)                   |                                |                                   | 1 (1-2)                                | 1 (0-1)                    |                                 |                                    | 0 (0-1)                                 | 0 (0-0)              |                           | 0 (0-0)                      | 0 (0-0)                           |
| 2010 | Mongolia                         | 1 (0-1)                   |                                |                                   | 0 (0-0)                                | 0 (0-0)                    |                                 |                                    | 0 (0-0)                                 | 0 (0-0)              |                           | 0 (0-0)                      | 0 (0-0)                           |
| 2011 | Mongolia                         | 1 (0-1)                   |                                |                                   | 0 (0-0)                                | 0 (0-0)                    |                                 |                                    | 0 (0-0)                                 | 0 (0-0)              |                           | 0 (0-0)                      | 0 (0-0)                           |
| 2012 | Mongolia                         | 0 (0-1)                   |                                |                                   | 0 (0-0)                                | 0 (0-0)                    |                                 |                                    | 0 (0-0)                                 | 0 (0-0)              |                           | 0 (0-0)                      | 0 (0-0)                           |
| 2013 | Mongolia                         | 0 (0-1)                   |                                |                                   | 0 (0-0)                                | 0 (0-0)                    |                                 |                                    | 0 (0-0)                                 | 0 (0-0)              |                           | 0 (0-0)                      | 0 (0-0)                           |
| 2014 | Mongolia                         | 0 (0-1)                   |                                |                                   | 0 (0-0)                                | 0 (0-0)                    |                                 |                                    | 0 (0-0)                                 | 0 (0-0)              |                           | 0 (0-0)                      | 0 (0-0)                           |
| 2015 | Mongolia                         | 0 (0-1)                   | 0 (0-0)                        |                                   | 0 (0-0)                                | 0 (0-0)                    | 0 (0-0)                         |                                    | 0 (0-0)                                 | 0 (0-0)              | 0 (0-0)                   | 0 (0-0)                      | 0 (0-0)                           |
| 2000 | Montenegro                       | 0 (0-0)                   |                                |                                   | 0 (0-1)                                | 0 (0-0)                    |                                 |                                    | 0 (0-0)                                 | 0 (0-0)              |                           | 0 (0-0)                      | 0 (0-0)                           |
| 2001 | Montenegro                       | 0 (0-0)                   |                                |                                   | 0 (0-0)                                | 0 (0-0)                    |                                 |                                    | 0 (0-0)                                 | 0 (0-0)              |                           | 0 (0-0)                      | 0 (0-0)                           |
| 2002 | Montenegro                       | 0 (0-0)                   |                                |                                   | 0 (0-0)                                | 0 (0-1)                    |                                 |                                    | 0 (0-0)                                 | 0 (0-0)              |                           | 0 (0-0)                      | 0 (0-0)                           |
| 2003 | Montenegro                       | 0 (0-0)                   |                                |                                   | 0 (0-1)                                | 1 (0-1)                    |                                 |                                    | 1 (0-1)                                 | 0 (0-0)              |                           | 0 (0-0)                      | 0 (0-0)                           |
| 2004 | Montenegro                       | 0 (0-0)                   |                                |                                   | 0 (0-1)                                | 1 (0-1)                    |                                 |                                    | 1 (0-3)                                 | 0 (0-0)              |                           | 0 (0-0)                      | 0 (0-0)                           |
| 2005 | Montenegro                       | 0 (0-0)                   |                                |                                   | 1 (1-1)                                | 1 (0-1)                    |                                 |                                    | 1 (0-1)                                 | 0 (0-0)              |                           | 0 (0-0)                      | 0 (0-0)                           |
| 2006 | Montenegro                       | 0 (0-0)                   |                                |                                   | 0 (0-0)                                | 0 (0-0)                    |                                 |                                    | 0 (0-0)                                 | 0 (0-0)              |                           | 0 (0-0)                      | 0 (0-0)                           |
| 2007 | Montenegro                       | 0 (0-0)                   |                                |                                   | 0 (0-0)                                | 0 (0-0)                    |                                 |                                    | 0 (0-0)                                 | 0 (0-0)              |                           | 0 (0-0)                      | 0 (0-0)                           |
| 2008 | Montenegro                       | 0 (0-0)                   |                                |                                   | 0 (0-0)                                | 0 (0-0)                    |                                 |                                    | 0 (0-0)                                 | 0 (0-0)              |                           | 0 (0-0)                      | 0 (0-0)                           |
| 2009 | Montenegro                       | 0 (0-0)                   |                                |                                   | 0 (0-0)                                | 0 (0-0)                    |                                 |                                    | 0 (0-0)                                 | 0 (0-0)              |                           | 0 (0-0)                      | 0 (0-0)                           |
| 2010 | Montenegro                       | 0 (0-0)                   |                                |                                   | 0 (0-0)                                | 0 (0-0)                    |                                 |                                    | 0 (0-0)                                 | 0 (0-0)              |                           | 0 (0-0)                      | 0 (0-0)                           |
| 2011 | Montenegro                       | 0 (0-0)                   |                                |                                   | 0 (0-0)                                | 0 (0-0)                    |                                 |                                    | 0 (0-0)                                 | 0 (0-0)              |                           | 0 (0-0)                      | 0 (0-0)                           |
| 2012 | Montenegro                       | 0 (0-0)                   |                                |                                   | 0 (0-0)                                | 0 (0-0)                    |                                 |                                    | 0 (0-0)                                 | 0 (0-0)              |                           | 0 (0-0)                      | 0 (0-0)                           |
| 2013 | Montenegro                       | 0 (0-0)                   |                                |                                   | 0 (0-0)                                | 0 (0-0)                    |                                 |                                    | 0 (0-0)                                 | 0 (0-0)              |                           | 0 (0-0)                      | 0 (0-0)                           |
| 2014 | Montenegro                       | 0 (0-0)                   |                                |                                   | 0 (0-0)                                | 0 (0-0)                    |                                 |                                    | 0 (0-0)                                 | 0 (0-0)              |                           | 0 (0-0)                      | 0 (0-0)                           |
| 2015 | Montenegro                       | 0 (0-0)                   | 0 (0-0)                        |                                   | 0 (0-0)                                | 0 (0-0)                    | 0 (0-0)                         |                                    | 0 (0-0)                                 | 0 (0-0)              | 0 (0-0)                   | 0 (0-0)                      | 0 (0-0)                           |
| 2000 | Morocco                          | 748 (526-983)             |                                |                                   | 25 (17-32)                             | 226 (63-382)               |                                 |                                    | 7 (2-13)                                | 2 (0-3)              |                           | 0 (0-0)                      | 0 (0-0)                           |
| 2001 | Morocco                          | 685 (482-900)             |                                |                                   | 23 (16-30)                             | 205 (57-346)               |                                 |                                    | 7 (2-12)                                | 2 (0-3)              |                           | 0 (0-0)                      | 0 (0-0)                           |
| 2002 | Morocco                          | 632 (445-831)             |                                |                                   | 22 (15-28)                             | 188 (52-316)               |                                 |                                    | 6 (2-11)                                | 1 (0-3)              |                           | 0 (0-0)                      | 0 (0-0)                           |
| 2003 | Morocco                          | 590 (415-776)             |                                |                                   | 20 (14-27)                             | 173 (49-291)               |                                 |                                    | 6 (2-10)                                | 1 (0-2)              |                           | 0 (0-0)                      | 0 (0-0)                           |
| 2004 | Morocco                          | 554 (390-728)             |                                |                                   | 19 (14-25)                             | 160 (45-271)               |                                 |                                    | 6 (2-9)                                 | 1 (0-2)              |                           | 0 (0-0)                      | 0 (0-0)                           |
| 2005 | Morocco                          | 524 (368-688)             |                                |                                   | 18 (13-24)                             | 159 (44-250)               |                                 |                                    | 5 (2-9)                                 | 1 (0-2)              |                           | 0 (0-0)                      | 0 (0-0)                           |
| 2006 | Morocco                          | 496 (349-652)             |                                |                                   | 17 (12-23)                             | 140 (43-232)               |                                 |                                    | 5 (2-8)                                 | 1 (0-2)              |                           | 0 (0-0)                      | 0 (0-0)                           |
| 2007 | Morocco                          | 75 (52-98)                |                                |                                   | 3 (2-3)                                | 21 (7-34)                  |                                 |                                    | 1 (0-1)                                 | 0 (0-0)              |                           | 0 (0-0)                      | 0 (0-0)                           |
| 2008 | Morocco                          | 27 (19-36)                |                                |                                   | 1 (1-1)                                | 7 (3-12)                   |                                 |                                    | 0 (0-0)                                 | 0 (0-0)              |                           | 0 (0-0)                      | 0 (0-0)                           |
| 2009 | Morocco                          | 27 (19-35)                |                                |                                   | 1 (1-1)                                | 7 (3-12)                   |                                 |                                    | 0 (0-0)                                 | 0 (0-0)              |                           | 0 (0-0)                      | 0 (0-0)                           |
| 2010 | Morocco                          | 26 (18-34)                |                                |                                   | 1 (1-1)                                | 7 (3-11)                   |                                 |                                    | 0 (0-0)                                 | 0 (0-0)              |                           | 0 (0-0)                      | 0 (0-0)                           |
| 2011 | Morocco                          | 26 (19-35)                |                                |                                   | 1 (1-1)                                | 7 (3-11)                   |                                 |                                    | 0 (0-0)                                 | 0 (0-0)              |                           | 0 (0-0)                      | 0 (0-0)                           |
| 2012 | Morocco                          | 4 (3-6)                   |                                |                                   | 0 (0-0)                                | 1 (0-2)                    |                                 |                                    | 0 (0-0)                                 | 0 (0-0)              |                           | 0 (0-0)                      | 0 (0-0)                           |
| 2013 | Morocco                          | 4 (3-6)                   |                                |                                   | 0 (0-0)                                | 1 (0-2)                    |                                 |                                    | 0 (0-0)                                 | 0 (0-0)              |                           | 0 (0-0)                      | 0 (0-0)                           |
| 2014 | Morocco                          | 4 (3-5)                   |                                |                                   | 0 (0-0)                                | 1 (0-2)                    |                                 |                                    | 0 (0-0)                                 | 0 (0-0)              |                           | 0 (0-0)                      | 0 (0-0)                           |
| 2015 | Morocco                          | 4 (3-5)                   | 0 (0-0)                        |                                   | 0 (0-0)                                | 1 (0-2)                    | 0 (0-0)                         |                                    | 0 (0-0)                                 | 0 (0-0)              | 0 (0-0)                   | 0 (0-0)                      | 0 (0-0)                           |
| 2000 | Mozambique                       | 2454 (1726-3224)          |                                |                                   | 75 (53-98)                             | 1312 (653-1915)            |                                 |                                    | 40 (20-58)                              | 5 (3-8)              |                           | 0 (0-0)                      | 0 (0-0)                           |
| 2001 | Mozambique                       | 2422 (1704-3183)          |                                |                                   | 72 (50-94)                             | 1279 (643-1861)            |                                 |                                    | 38 (19-55)                              | 5 (3-8)              |                           | 0 (0-0)                      | 0 (0-0)                           |
| 2002 | Mozambique                       | 2427 (1707-3188)          |                                |                                   | 70 (49-91)                             | 1264 (642-1832)            |                                 |                                    | 36 (18-52)                              | 5 (3-7)              |                           | 0 (0-0)                      | 0 (0-0)                           |
| 2003 | Mozambique                       | 2448 (1722-3216)          |                                |                                   | 68 (48-90)                             | 1259 (456-1997)            |                                 |                                    | 35 (13-56)                              | 5 (2-8)              |                           | 0 (0-0)                      | 0 (0-0)                           |
| 2004 | Mozambique                       | 2496 (1756-3280)          |                                |                                   | 68 (48-89)                             | 1265 (467-1999)            |                                 |                                    | 34 (13-54)                              | 5 (2-8)              |                           | 0 (0-0)                      | 0 (0-0)                           |
| 2005 | Mozambique                       | 2548 (1792-3348)          |                                |                                   | 67 (47-88)                             | 1273 (478-2002)            |                                 |                                    | 34 (13-53)                              | 5 (2-8)              |                           | 0 (0-0)                      | 0 (0-0)                           |
| 2006 | Mozambique                       | 2573 (1810-3381)          |                                |                                   | 66 (46-87)                             | 1268 (485-1985)            |                                 |                                    | 32 (12-51)                              | 5 (2-8)              |                           | 0 (0-0)                      | 0 (0-0)                           |

Hib = *Haemophilus influenzae* type b; npnm = non-pneumonia, non-meningitis; HIV = deaths only in HIV-infected children; Uncertainty range provided in parentheses.

| Year | Country     | Hib pneumonia deaths (UR) | Hib pneumonia deaths, HIV (UR) | Hib pneumonia mortality rate (UR) | Hib pneumonia mortality rate, HIV (UR) | Hib meningitis deaths (UR) | Hib meningitis deaths, HIV (UR) | Hib meningitis mortality rate (UR) | Hib meningitis mortality rate, HIV (UR) | Hib NPMN deaths (UR) | Hib NPMN deaths, HIV (UR) | Hib NPMN mortality rate (UR) | Hib NPMN mortality rate, HIV (UR) |
|------|-------------|---------------------------|--------------------------------|-----------------------------------|----------------------------------------|----------------------------|---------------------------------|------------------------------------|-----------------------------------------|----------------------|---------------------------|------------------------------|-----------------------------------|
| 2007 | Mozambique  | 2561 (1801-3365)          |                                | 64 (45-84)                        |                                        | 1244 (485-1937)            |                                 | 31 (12-48)                         |                                         | 5 (2-8)              |                           | 0 (0-0)                      |                                   |
| 2008 | Mozambique  | 2537 (1784-3333)          |                                | 62 (44-81)                        |                                        | 1217 (482-1881)            |                                 | 30 (12-46)                         |                                         | 5 (2-8)              |                           | 0 (0-0)                      |                                   |
| 2009 | Mozambique  | 593 (417-780)             |                                | 14 (10-19)                        |                                        | 281 (107-441)              |                                 | 7 (3-11)                           |                                         | 1 (0-2)              |                           | 0 (0-0)                      |                                   |
| 2010 | Mozambique  | 264 (186-347)             |                                | 6 (4-8)                           |                                        | 124 (45-196)               |                                 | 3 (1-5)                            |                                         | 1 (0-1)              |                           | 0 (0-0)                      |                                   |
| 2011 | Mozambique  | 249 (175-327)             |                                | 6 (4-7)                           |                                        | 115 (40-185)               |                                 | 3 (1-4)                            |                                         | 0 (0-1)              |                           | 0 (0-0)                      |                                   |
| 2012 | Mozambique  | 241 (170-317)             |                                | 5 (4-7)                           |                                        | 111 (37-179)               |                                 | 2 (1-4)                            |                                         | 0 (0-1)              |                           | 0 (0-0)                      |                                   |
| 2013 | Mozambique  | 231 (163-304)             |                                | 5 (4-7)                           |                                        | 106 (34-172)               |                                 | 2 (1-4)                            |                                         | 0 (0-1)              |                           | 0 (0-0)                      |                                   |
| 2014 | Mozambique  | 22 (16-29)                |                                | 0 (0-1)                           |                                        | 10 (3-17)                  |                                 | 0 (0-0)                            |                                         | 0 (0-0)              |                           | 0 (0-0)                      |                                   |
| 2015 | Mozambique  | 22 (16-29)                | 1 (1-2)                        | 0 (0-1)                           | 0 (0-0)                                | 10 (3-17)                  | 1 (0-1)                         | 0 (0-0)                            | 0 (0-0)                                 | 0 (0-0)              | 0 (0-0)                   | 0 (0-0)                      | 0 (0-0)                           |
| 2000 | Myanmar     | 2236 (1573-2938)          |                                | 44 (31-57)                        |                                        | 1110 (379-1762)            |                                 | 22 (7-34)                          |                                         | 5 (2-7)              |                           | 0 (0-0)                      |                                   |
| 2001 | Myanmar     | 2204 (1550-2896)          |                                | 42 (30-56)                        |                                        | 1056 (378-1658)            |                                 | 20 (7-32)                          |                                         | 4 (2-7)              |                           | 0 (0-0)                      |                                   |
| 2002 | Myanmar     | 2169 (1525-2949)          |                                | 41 (29-54)                        |                                        | 1003 (379-1556)            |                                 | 19 (7-29)                          |                                         | 4 (2-6)              |                           | 0 (0-0)                      |                                   |
| 2003 | Myanmar     | 2108 (1483-2778)          |                                | 40 (28-52)                        |                                        | 943 (375-1440)             |                                 | 18 (7-27)                          |                                         | 4 (2-6)              |                           | 0 (0-0)                      |                                   |
| 2004 | Myanmar     | 2028 (1426-2665)          |                                | 38 (27-50)                        |                                        | 877 (323-1379)             |                                 | 16 (6-26)                          |                                         | 7 (3-11)             |                           | 0 (0-0)                      |                                   |
| 2005 | Myanmar     | 1935 (1361-2543)          |                                | 36 (26-48)                        |                                        | 809 (300-1272)             |                                 | 15 (6-24)                          |                                         | 6 (2-10)             |                           | 0 (0-0)                      |                                   |
| 2006 | Myanmar     | 1829 (1286-2403)          |                                | 34 (24-45)                        |                                        | 742 (277-1165)             |                                 | 14 (5-22)                          |                                         | 6 (2-9)              |                           | 0 (0-0)                      |                                   |
| 2007 | Myanmar     | 1708 (1201-2244)          |                                | 32 (23-43)                        |                                        | 677 (254-1062)             |                                 | 13 (5-20)                          |                                         | 5 (2-8)              |                           | 0 (0-0)                      |                                   |
| 2008 | Myanmar     | 2603 (1831-3420)          |                                | 50 (35-66)                        |                                        | 1014 (417-1545)            |                                 | 20 (8-30)                          |                                         | 4 (2-6)              |                           | 0 (0-0)                      |                                   |
| 2009 | Myanmar     | 1484 (1043-1949)          |                                | 29 (21-38)                        |                                        | 571 (217-893)              |                                 | 11 (4-18)                          |                                         | 5 (2-7)              |                           | 0 (0-0)                      |                                   |
| 2010 | Myanmar     | 1386 (975-1821)           |                                | 28 (20-37)                        |                                        | 527 (200-824)              |                                 | 11 (4-17)                          |                                         | 4 (2-7)              |                           | 0 (0-0)                      |                                   |
| 2011 | Myanmar     | 1289 (906-1693)           |                                | 27 (19-35)                        |                                        | 484 (185-755)              |                                 | 10 (4-16)                          |                                         | 4 (1-6)              |                           | 0 (0-0)                      |                                   |
| 2012 | Myanmar     | 1207 (849-1586)           |                                | 26 (18-34)                        |                                        | 447 (172-696)              |                                 | 9 (4-15)                           |                                         | 4 (1-6)              |                           | 0 (0-0)                      |                                   |
| 2013 | Myanmar     | 261 (183-343)             |                                | 6 (4-7)                           |                                        | 95 (37-149)                |                                 | 2 (1-3)                            |                                         | 1 (0-1)              |                           | 0 (0-0)                      |                                   |
| 2014 | Myanmar     | 117 (82-154)              |                                | 3 (2-3)                           |                                        | 43 (17-66)                 |                                 | 1 (0-1)                            |                                         | 0 (0-1)              |                           | 0 (0-0)                      |                                   |
| 2015 | Myanmar     | 112 (79-147)              | 1 (1-1)                        | 2 (2-3)                           | 0 (0-0)                                | 40 (16-63)                 | 0 (0-0)                         | 1 (0-1)                            | 0 (0-0)                                 | 0 (0-0)              | 0 (0-0)                   | 0 (0-0)                      | 0 (0-0)                           |
| 2000 | Namibia     | 90 (63-118)               |                                | 33 (23-44)                        |                                        | 24 (8-38)                  |                                 | 9 (3-14)                           |                                         | 0 (0-0)              |                           | 0 (0-0)                      |                                   |
| 2001 | Namibia     | 90 (64-119)               |                                | 33 (23-44)                        |                                        | 24 (9-38)                  |                                 | 9 (3-14)                           |                                         | 0 (0-0)              |                           | 0 (0-0)                      |                                   |
| 2002 | Namibia     | 90 (63-118)               |                                | 33 (23-43)                        |                                        | 23 (8-37)                  |                                 | 9 (3-14)                           |                                         | 0 (0-0)              |                           | 0 (0-0)                      |                                   |
| 2003 | Namibia     | 90 (63-118)               |                                | 33 (23-43)                        |                                        | 23 (8-36)                  |                                 | 8 (3-13)                           |                                         | 0 (0-0)              |                           | 0 (0-0)                      |                                   |
| 2004 | Namibia     | 90 (63-118)               |                                | 33 (23-43)                        |                                        | 23 (8-37)                  |                                 | 8 (3-14)                           |                                         | 0 (0-0)              |                           | 0 (0-0)                      |                                   |
| 2005 | Namibia     | 90 (63-118)               |                                | 33 (23-43)                        |                                        | 22 (8-36)                  |                                 | 8 (3-13)                           |                                         | 0 (0-0)              |                           | 0 (0-0)                      |                                   |
| 2006 | Namibia     | 90 (63-118)               |                                | 33 (23-43)                        |                                        | 22 (8-36)                  |                                 | 8 (3-13)                           |                                         | 0 (0-0)              |                           | 0 (0-0)                      |                                   |
| 2007 | Namibia     | 91 (64-119)               |                                | 33 (23-43)                        |                                        | 22 (8-36)                  |                                 | 8 (3-13)                           |                                         | 0 (0-0)              |                           | 0 (0-0)                      |                                   |
| 2008 | Namibia     | 92 (65-121)               |                                | 33 (23-43)                        |                                        | 23 (8-36)                  |                                 | 8 (3-13)                           |                                         | 0 (0-0)              |                           | 0 (0-0)                      |                                   |
| 2009 | Namibia     | 93 (65-122)               |                                | 33 (23-43)                        |                                        | 23 (8-36)                  |                                 | 8 (3-13)                           |                                         | 0 (0-0)              |                           | 0 (0-0)                      |                                   |
| 2010 | Namibia     | 15 (11-20)                |                                | 5 (4-7)                           |                                        | 4 (1-6)                    |                                 | 1 (0-2)                            |                                         | 0 (0-0)              |                           | 0 (0-0)                      |                                   |
| 2011 | Namibia     | 9 (6-12)                  |                                | 3 (2-4)                           |                                        | 2 (1-3)                    |                                 | 1 (0-1)                            |                                         | 0 (0-0)              |                           | 0 (0-0)                      |                                   |
| 2012 | Namibia     | 9 (6-12)                  |                                | 3 (2-4)                           |                                        | 2 (1-3)                    |                                 | 1 (0-1)                            |                                         | 0 (0-0)              |                           | 0 (0-0)                      |                                   |
| 2013 | Namibia     | 8 (6-11)                  |                                | 3 (2-3)                           |                                        | 2 (1-3)                    |                                 | 1 (0-1)                            |                                         | 0 (0-0)              |                           | 0 (0-0)                      |                                   |
| 2014 | Namibia     | 9 (6-11)                  |                                | 3 (2-3)                           |                                        | 2 (1-3)                    |                                 | 1 (0-1)                            |                                         | 0 (0-0)              |                           | 0 (0-0)                      |                                   |
| 2015 | Namibia     | 1 (1-1)                   | 0 (0-0)                        | 0 (0-0)                           | 0 (0-0)                                | 0 (0-0)                    | 0 (0-0)                         | 0 (0-0)                            | 0 (0-0)                                 | 0 (0-0)              | 0 (0-0)                   | 0 (0-0)                      | 0 (0-0)                           |
| 2000 | Nauru       | 0 (0-0)                   |                                | 19 (14-26)                        |                                        | 0 (0-0)                    |                                 | 7 (4-9)                            |                                         | 0 (0-0)              |                           | 0 (0-0)                      |                                   |
| 2001 | Nauru       | 0 (0-0)                   |                                | 20 (14-26)                        |                                        | 0 (0-0)                    |                                 | 7 (4-10)                           |                                         | 0 (0-0)              |                           | 0 (0-0)                      |                                   |
| 2002 | Nauru       | 0 (0-0)                   |                                | 16 (11-21)                        |                                        | 0 (0-0)                    |                                 | 6 (3-8)                            |                                         | 0 (0-0)              |                           | 0 (0-0)                      |                                   |
| 2003 | Nauru       | 0 (0-0)                   |                                | 19 (14-25)                        |                                        | 0 (0-0)                    |                                 | 8 (4-10)                           |                                         | 0 (0-0)              |                           | 0 (0-0)                      |                                   |
| 2004 | Nauru       | 0 (0-0)                   |                                | 19 (13-25)                        |                                        | 0 (0-0)                    |                                 | 8 (4-10)                           |                                         | 0 (0-0)              |                           | 0 (0-0)                      |                                   |
| 2005 | Nauru       | 0 (0-0)                   |                                | 19 (13-25)                        |                                        | 0 (0-0)                    |                                 | 8 (4-10)                           |                                         | 0 (0-0)              |                           | 0 (0-0)                      |                                   |
| 2006 | Nauru       | 0 (0-0)                   |                                | 19 (14-25)                        |                                        | 0 (0-0)                    |                                 | 8 (4-11)                           |                                         | 0 (0-0)              |                           | 0 (0-0)                      |                                   |
| 2007 | Nauru       | 0 (0-0)                   |                                | 16 (11-21)                        |                                        | 0 (0-0)                    |                                 | 7 (4-9)                            |                                         | 0 (0-0)              |                           | 0 (0-0)                      |                                   |
| 2008 | Nauru       | 0 (0-0)                   |                                | 16 (12-22)                        |                                        | 0 (0-0)                    |                                 | 7 (4-9)                            |                                         | 0 (0-0)              |                           | 0 (0-0)                      |                                   |
| 2009 | Nauru       | 0 (0-0)                   |                                | 0 (0-0)                           |                                        | 0 (0-0)                    |                                 | 10 (7-13)                          |                                         | 0 (0-0)              |                           | 0 (0-0)                      |                                   |
| 2010 | Nauru       | 0 (0-0)                   |                                | 2 (1-3)                           |                                        | 0 (0-0)                    |                                 | 1 (0-1)                            |                                         | 0 (0-0)              |                           | 0 (0-0)                      |                                   |
| 2011 | Nauru       | 0 (0-0)                   |                                | 1 (1-1)                           |                                        | 0 (0-0)                    |                                 | 0 (0-0)                            |                                         | 0 (0-0)              |                           | 0 (0-0)                      |                                   |
| 2012 | Nauru       | 0 (0-0)                   |                                | 1 (1-2)                           |                                        | 0 (0-0)                    |                                 | 1 (0-1)                            |                                         | 0 (0-0)              |                           | 0 (0-0)                      |                                   |
| 2013 | Nauru       | 0 (0-0)                   |                                | 1 (1-2)                           |                                        | 0 (0-0)                    |                                 | 0 (0-1)                            |                                         | 0 (0-0)              |                           | 0 (0-0)                      |                                   |
| 2014 | Nauru       | 0 (0-0)                   |                                | 0 (0-0)                           |                                        | 0 (0-0)                    |                                 | 0 (0-0)                            |                                         | 0 (0-0)              |                           | 0 (0-0)                      |                                   |
| 2015 | Nauru       | 0 (0-0)                   | 0 (0-0)                        | 0 (0-0)                           | 0 (0-0)                                | 0 (0-0)                    | 0 (0-0)                         | 0 (0-0)                            | 0 (0-0)                                 | 0 (0-0)              | 0 (0-0)                   | 0 (0-0)                      | 0 (0-0)                           |
| 2000 | Nepal       | 1398 (883-1837)           |                                | 40 (28-52)                        |                                        | 588 (166-858)              |                                 | 17 (9-27)                          |                                         | 2 (1-4)              |                           | 0 (0-0)                      |                                   |
| 2001 | Nepal       | 1308 (820-1718)           |                                | 37 (26-49)                        |                                        | 547 (158-888)              |                                 | 16 (4-25)                          |                                         | 2 (1-4)              |                           | 0 (0-0)                      |                                   |
| 2002 | Nepal       | 1197 (842-1573)           |                                | 34 (24-45)                        |                                        | 499 (131-830)              |                                 | 14 (4-24)                          |                                         | 4 (1-7)              |                           | 0 (0-0)                      |                                   |
| 2003 | Nepal       | 1097 (772-1442)           |                                | 32 (22-41)                        |                                        | 455 (122-755)              |                                 | 13 (4-22)                          |                                         | 4 (1-6)              |                           | 0 (0-0)                      |                                   |
| 2004 | Nepal       | 997 (701-1310)            |                                | 29 (20-38)                        |                                        | 411 (114-679)              |                                 | 12 (3-20)                          |                                         | 3 (1-5)              |                           | 0 (0-0)                      |                                   |
| 2005 | Nepal       | 910 (640-1195)            |                                | 27 (19-35)                        |                                        | 373 (106-613)              |                                 | 11 (3-18)                          |                                         | 3 (1-5)              |                           | 0 (0-0)                      |                                   |
| 2006 | Nepal       | 829 (583-1090)            |                                | 25 (18-33)                        |                                        | 337 (89-533)               |                                 | 10 (3-17)                          |                                         | 3 (1-4)              |                           | 0 (0-0)                      |                                   |
| 2007 | Nepal       | 782 (536-1001)            |                                | 23 (16-31)                        |                                        | 307 (81-502)               |                                 | 9 (3-15)                           |                                         | 2 (1-4)              |                           | 0 (0-0)                      |                                   |
| 2008 | Nepal       | 696 (490-915)             |                                | 22 (15-28)                        |                                        | 278 (83-454)               |                                 | 9 (3-14)                           |                                         | 2 (1-4)              |                           | 0 (0-0)                      |                                   |
| 2009 | Nepal       | 643 (452-845)             |                                | 20 (14-27)                        |                                        | 255 (77-415)               |                                 | 8 (2-13)                           |                                         | 2 (1-3)              |                           | 0 (0-0)                      |                                   |
| 2010 | Nepal       | 585 (411-769)             |                                | 19 (13-25)                        |                                        | 230 (71-374)               |                                 | 7 (2-12)                           |                                         | 2 (1-3)              |                           | 0 (0-0)                      |                                   |
| 2011 | Nepal       | 84 (58-110)               |                                | 3 (2-4)                           |                                        | 33 (10-53)                 |                                 | 1 (0-2)                            |                                         | 0 (0-0)              |                           | 0 (0-0)                      |                                   |
| 2012 | Nepal       | 39 (27-51)                |                                | 1 (1-2)                           |                                        | 15 (5-24)                  |                                 | 1 (0-1)                            |                                         | 0 (0-0)              |                           | 0 (0-0)                      |                                   |
| 2013 | Nepal       | 34 (24-45)                |                                | 1 (1-2)                           |                                        | 13 (4-21)                  |                                 | 0 (0-1)                            |                                         | 0 (0-0)              |                           | 0 (0-0)                      |                                   |
| 2014 | Nepal       | 31 (22-41)                |                                | 1 (1-1)                           |                                        | 12 (4-20)                  |                                 | 0 (0-1)                            |                                         | 0 (0-0)              |                           | 0 (0-0)                      |                                   |
| 2015 | Nepal       | 30 (21-40)                | 0 (0-0)                        | 1 (1-1)                           | 0 (0-0)                                | 11 (4-19)                  | 0 (0-0)                         | 0 (0-1)                            | 0 (0-0)                                 | 0 (0-0)              | 0 (0-0)                   | 0 (0-0)                      | 0 (0-0)                           |
| 2000 | Netherlands | 0 (0-0)                   |                                | 0 (0-0)                           |                                        | 0 (0-0)                    |                                 | 0 (0-0)                            |                                         | 0 (0-0)              |                           | 0 (0-0)                      |                                   |
| 2001 | Netherlands | 0 (0-0)                   |                                | 0 (0-0)                           |                                        | 1 (0-1)                    |                                 | 0 (0-0)                            |                                         | 0 (0-0)              |                           | 0 (0-0)                      |                                   |
| 2002 | Netherlands | 0 (0-0)                   |                                | 0 (0-0)                           |                                        | 0 (0-0)                    |                                 | 0 (0-0)                            |                                         | 0 (0-0)              |                           | 0 (0-0)                      |                                   |
| 2003 | Netherlands | 0 (0-0)                   |                                | 0 (0-0)                           |                                        | 0 (0-0)                    |                                 | 0 (0-0)                            |                                         | 0 (0-0)              |                           | 0 (0-0)                      |                                   |
| 2004 | Netherlands | 0 (0-0)                   |                                | 0 (0-0)                           |                                        | 0 (0-0)                    |                                 | 0 (0-0)                            |                                         | 0 (0-0)              |                           | 0 (0-0)                      |                                   |
| 2005 | Netherlands | 0 (0-0)                   |                                | 0 (0-0)                           |                                        | 0 (0-0)                    |                                 | 0 (0-0)                            |                                         | 0 (0-0)              |                           | 0 (0-0)                      |                                   |
| 2006 | Netherlands | 0 (0-0)                   |                                | 0 (0-0)                           |                                        | 0 (0-0)                    |                                 | 0 (0-0)                            |                                         | 0 (0-0)              |                           | 0 (0-0)                      |                                   |
| 2007 | Netherlands | 0 (0-0)                   |                                | 0 (0-0)                           |                                        | 0 (0-0)                    |                                 | 0 (0-0)                            |                                         | 0 (0-0)              |                           | 0 (0-0)                      |                                   |
| 2008 | Netherlands | 0 (0-0)                   |                                | 0 (0-0)                           |                                        | 0 (0-0)                    |                                 | 0 (0-0)                            |                                         | 0 (0-0)              |                           | 0 (0-0)                      |                                   |
| 2009 | Netherlands | 0 (0-0)                   |                                | 0 (0-0)                           |                                        | 0 (0-0)                    |                                 | 0 (0-0)                            |                                         | 0 (0-0)              |                           | 0 (0-0)                      |                                   |
| 2010 | Netherlands | 0 (0-0)                   |                                | 0 (0-0)                           |                                        | 0 (0-0)                    |                                 | 0 (0-0)                            |                                         | 0 (0-0)              |                           | 0 (0-0)                      |                                   |
| 2011 | Netherlands | 0 (0-0)                   |                                | 0 (0-0)                           |                                        | 0 (0-0)                    |                                 | 0 (0-0)                            |                                         | 0 (0-0)              |                           | 0 (0-0)                      |                                   |
| 2012 | Netherlands | 0 (0-0)                   |                                | 0 (0-0)                           |                                        | 0 (0-0)                    |                                 | 0 (0-0)                            |                                         | 0 (0-0)              |                           | 0 (0-0)                      |                                   |
| 2013 | Netherlands | 0 (0-0)                   |                                | 0 (0-0)                           |                                        | 0 (0-0)                    |                                 | 0 (0-0)                            |                                         | 0 (0-0)              |                           | 0 (0-0)                      |                                   |
| 2014 | Netherlands | 0 (0-0)                   |                                | 0 (0-0)                           |                                        | 0 (0-0)                    |                                 | 0 (0-0)                            |                                         | 0 (0-0)              |                           | 0 (0-0)                      |                                   |

Hib = *Haemophilus influenzae* type b; npmn = non-pneumonia, non-meningitis; HIV = deaths only in HIV-infected children; Uncertainty range provided in parentheses.

| Year | Country     | Hib pneumonia deaths (UR) | Hib pneumonia deaths, HIV (UR) | Hib pneumonia mortality rate (UR) | Hib pneumonia mortality rate, HIV (UR) | Hib meningitis deaths (UR) | Hib meningitis deaths, HIV (UR) | Hib meningitis mortality rate (UR) | Hib meningitis mortality rate, HIV (UR) | Hib NPNM deaths (UR) | Hib NPNM deaths, HIV (UR) | Hib NPNM mortality rate (UR) | Hib NPNM mortality rate, HIV (UR) |
|------|-------------|---------------------------|--------------------------------|-----------------------------------|----------------------------------------|----------------------------|---------------------------------|------------------------------------|-----------------------------------------|----------------------|---------------------------|------------------------------|-----------------------------------|
| 2015 | Netherlands | 0 (0-0)                   | 0 (0-0)                        | 0 (0-0)                           | 0 (0-0)                                | 0 (0-0)                    | 0 (0-0)                         | 0 (0-0)                            | 0 (0-0)                                 | 0 (0-0)              | 0 (0-0)                   | 0 (0-0)                      | 0 (0-0)                           |
| 2000 | New Zealand | 0 (0-0)                   | 0 (0-0)                        | 0 (0-0)                           | 0 (0-0)                                | 1 (1-1)                    | 0 (0-0)                         | 0 (0-0)                            | 0 (0-0)                                 | 0 (0-0)              | 0 (0-0)                   | 0 (0-0)                      | 0 (0-0)                           |
| 2001 | New Zealand | 0 (0-0)                   | 0 (0-0)                        | 0 (0-0)                           | 0 (0-0)                                | 1 (1-2)                    | 0 (0-1)                         | 0 (0-1)                            | 0 (0-1)                                 | 0 (0-0)              | 0 (0-0)                   | 0 (0-0)                      | 0 (0-0)                           |
| 2002 | New Zealand | 0 (0-0)                   | 0 (0-0)                        | 0 (0-0)                           | 0 (0-0)                                | 0 (0-0)                    | 0 (0-0)                         | 0 (0-0)                            | 0 (0-0)                                 | 0 (0-0)              | 0 (0-0)                   | 0 (0-0)                      | 0 (0-0)                           |
| 2003 | New Zealand | 0 (0-0)                   | 0 (0-0)                        | 0 (0-0)                           | 0 (0-0)                                | 0 (0-0)                    | 0 (0-0)                         | 0 (0-0)                            | 0 (0-0)                                 | 0 (0-0)              | 0 (0-0)                   | 0 (0-0)                      | 0 (0-0)                           |
| 2004 | New Zealand | 0 (0-0)                   | 0 (0-0)                        | 0 (0-0)                           | 0 (0-0)                                | 0 (0-0)                    | 0 (0-0)                         | 0 (0-0)                            | 0 (0-0)                                 | 0 (0-0)              | 0 (0-0)                   | 0 (0-0)                      | 0 (0-0)                           |
| 2005 | New Zealand | 0 (0-0)                   | 0 (0-0)                        | 0 (0-0)                           | 0 (0-0)                                | 0 (0-0)                    | 0 (0-0)                         | 0 (0-0)                            | 0 (0-0)                                 | 0 (0-0)              | 0 (0-0)                   | 0 (0-0)                      | 0 (0-0)                           |
| 2006 | New Zealand | 0 (0-0)                   | 0 (0-0)                        | 0 (0-0)                           | 0 (0-0)                                | 0 (0-0)                    | 0 (0-0)                         | 0 (0-0)                            | 0 (0-0)                                 | 0 (0-0)              | 0 (0-0)                   | 0 (0-0)                      | 0 (0-0)                           |
| 2007 | New Zealand | 0 (0-0)                   | 0 (0-0)                        | 0 (0-0)                           | 0 (0-0)                                | 0 (0-0)                    | 0 (0-0)                         | 0 (0-0)                            | 0 (0-0)                                 | 0 (0-0)              | 0 (0-0)                   | 0 (0-0)                      | 0 (0-0)                           |
| 2008 | New Zealand | 0 (0-0)                   | 0 (0-0)                        | 0 (0-0)                           | 0 (0-0)                                | 0 (0-0)                    | 0 (0-0)                         | 0 (0-0)                            | 0 (0-0)                                 | 0 (0-0)              | 0 (0-0)                   | 0 (0-0)                      | 0 (0-0)                           |
| 2009 | New Zealand | 0 (0-0)                   | 0 (0-0)                        | 0 (0-0)                           | 0 (0-0)                                | 0 (0-0)                    | 0 (0-0)                         | 0 (0-0)                            | 0 (0-0)                                 | 0 (0-0)              | 0 (0-0)                   | 0 (0-0)                      | 0 (0-0)                           |
| 2010 | New Zealand | 0 (0-0)                   | 0 (0-0)                        | 0 (0-0)                           | 0 (0-0)                                | 0 (0-0)                    | 0 (0-0)                         | 0 (0-0)                            | 0 (0-0)                                 | 0 (0-0)              | 0 (0-0)                   | 0 (0-0)                      | 0 (0-0)                           |
| 2011 | New Zealand | 0 (0-0)                   | 0 (0-0)                        | 0 (0-0)                           | 0 (0-0)                                | 0 (0-0)                    | 0 (0-0)                         | 0 (0-0)                            | 0 (0-0)                                 | 0 (0-0)              | 0 (0-0)                   | 0 (0-0)                      | 0 (0-0)                           |
| 2012 | New Zealand | 0 (0-0)                   | 0 (0-0)                        | 0 (0-0)                           | 0 (0-0)                                | 0 (0-0)                    | 0 (0-0)                         | 0 (0-0)                            | 0 (0-0)                                 | 0 (0-0)              | 0 (0-0)                   | 0 (0-0)                      | 0 (0-0)                           |
| 2013 | New Zealand | 0 (0-0)                   | 0 (0-0)                        | 0 (0-0)                           | 0 (0-0)                                | 0 (0-0)                    | 0 (0-0)                         | 0 (0-0)                            | 0 (0-0)                                 | 0 (0-0)              | 0 (0-0)                   | 0 (0-0)                      | 0 (0-0)                           |
| 2014 | New Zealand | 0 (0-0)                   | 0 (0-0)                        | 0 (0-0)                           | 0 (0-0)                                | 0 (0-0)                    | 0 (0-0)                         | 0 (0-0)                            | 0 (0-0)                                 | 0 (0-0)              | 0 (0-0)                   | 0 (0-0)                      | 0 (0-0)                           |
| 2015 | New Zealand | 0 (0-0)                   | 0 (0-0)                        | 0 (0-0)                           | 0 (0-0)                                | 0 (0-0)                    | 0 (0-0)                         | 0 (0-0)                            | 0 (0-0)                                 | 0 (0-0)              | 0 (0-0)                   | 0 (0-0)                      | 0 (0-0)                           |
| 2000 | Nicaragua   | 17 (12-22)                |                                | 3 (2-3)                           |                                        | 5 (2-9)                    |                                 | 1 (0-1)                            |                                         | 0 (0-0)              |                           | 0 (0-0)                      | 0 (0-0)                           |
| 2001 | Nicaragua   | 15 (10-19)                |                                | 2 (2-3)                           |                                        | 5 (1-8)                    |                                 | 1 (0-1)                            |                                         | 0 (0-0)              |                           | 0 (0-0)                      | 0 (0-0)                           |
| 2002 | Nicaragua   | 14 (10-18)                |                                | 2 (2-3)                           |                                        | 4 (1-7)                    |                                 | 1 (0-1)                            |                                         | 0 (0-0)              |                           | 0 (0-0)                      | 0 (0-0)                           |
| 2003 | Nicaragua   | 12 (9-16)                 |                                | 2 (1-3)                           |                                        | 4 (1-7)                    |                                 | 1 (0-1)                            |                                         | 0 (0-0)              |                           | 0 (0-0)                      | 0 (0-0)                           |
| 2004 | Nicaragua   | 1 (1-2)                   |                                | 0 (0-0)                           |                                        | 0 (0-1)                    |                                 | 0 (0-0)                            |                                         | 0 (0-0)              |                           | 0 (0-0)                      | 0 (0-0)                           |
| 2005 | Nicaragua   | 1 (1-2)                   |                                | 0 (0-0)                           |                                        | 0 (0-1)                    |                                 | 0 (0-0)                            |                                         | 0 (0-0)              |                           | 0 (0-0)                      | 0 (0-0)                           |
| 2006 | Nicaragua   | 1 (1-2)                   |                                | 0 (0-0)                           |                                        | 0 (0-1)                    |                                 | 0 (0-0)                            |                                         | 0 (0-0)              |                           | 0 (0-0)                      | 0 (0-0)                           |
| 2007 | Nicaragua   | 1 (1-2)                   |                                | 0 (0-0)                           |                                        | 0 (0-1)                    |                                 | 0 (0-0)                            |                                         | 0 (0-0)              |                           | 0 (0-0)                      | 0 (0-0)                           |
| 2008 | Nicaragua   | 1 (1-2)                   |                                | 0 (0-0)                           |                                        | 0 (0-1)                    |                                 | 0 (0-0)                            |                                         | 0 (0-0)              |                           | 0 (0-0)                      | 0 (0-0)                           |
| 2009 | Nicaragua   | 1 (1-2)                   |                                | 0 (0-0)                           |                                        | 0 (0-1)                    |                                 | 0 (0-0)                            |                                         | 0 (0-0)              |                           | 0 (0-0)                      | 0 (0-0)                           |
| 2010 | Nicaragua   | 1 (1-1)                   |                                | 0 (0-0)                           |                                        | 0 (0-1)                    |                                 | 0 (0-0)                            |                                         | 0 (0-0)              |                           | 0 (0-0)                      | 0 (0-0)                           |
| 2011 | Nicaragua   | 1 (1-2)                   |                                | 0 (0-0)                           |                                        | 0 (0-1)                    |                                 | 0 (0-0)                            |                                         | 0 (0-0)              |                           | 0 (0-0)                      | 0 (0-0)                           |
| 2012 | Nicaragua   | 1 (1-2)                   |                                | 0 (0-0)                           |                                        | 0 (0-1)                    |                                 | 0 (0-0)                            |                                         | 0 (0-0)              |                           | 0 (0-0)                      | 0 (0-0)                           |
| 2013 | Nicaragua   | 1 (1-2)                   |                                | 0 (0-0)                           |                                        | 0 (0-1)                    |                                 | 0 (0-0)                            |                                         | 0 (0-0)              |                           | 0 (0-0)                      | 0 (0-0)                           |
| 2014 | Nicaragua   | 1 (1-1)                   |                                | 0 (0-0)                           |                                        | 0 (0-1)                    |                                 | 0 (0-0)                            |                                         | 0 (0-0)              |                           | 0 (0-0)                      | 0 (0-0)                           |
| 2015 | Nicaragua   | 1 (1-1)                   |                                | 0 (0-0)                           |                                        | 0 (0-1)                    |                                 | 0 (0-0)                            |                                         | 0 (0-0)              |                           | 0 (0-0)                      | 0 (0-0)                           |
| 2000 | Niger       | 3355 (2360-4408)          |                                | 148 (104-194)                     |                                        | 1616 (724-2428)            |                                 | 71 (32-107)                        |                                         | 7 (3-10)             |                           | 0 (0-0)                      | 0 (0-0)                           |
| 2001 | Niger       | 3433 (2415-4511)          |                                | 144 (101-189)                     |                                        | 1655 (753-2475)            |                                 | 69 (32-104)                        |                                         | 7 (3-10)             |                           | 0 (0-0)                      | 0 (0-0)                           |
| 2002 | Niger       | 3448 (2425-4530)          |                                | 139 (98-183)                      |                                        | 1664 (768-2477)            |                                 | 67 (31-100)                        |                                         | 7 (3-10)             |                           | 0 (0-0)                      | 0 (0-0)                           |
| 2003 | Niger       | 3418 (2404-4491)          |                                | 133 (94-175)                      |                                        | 1648 (772-2443)            |                                 | 64 (30-95)                         |                                         | 7 (3-10)             |                           | 0 (0-0)                      | 0 (0-0)                           |
| 2004 | Niger       | 3364 (2366-4420)          |                                | 127 (89-169)                      |                                        | 1621 (772-2392)            |                                 | 61 (29-90)                         |                                         | 7 (3-10)             |                           | 0 (0-0)                      | 0 (0-0)                           |
| 2005 | Niger       | 3298 (2314-4333)          |                                | 120 (84-157)                      |                                        | 1587 (768-2330)            |                                 | 58 (28-85)                         |                                         | 6 (3-9)              |                           | 0 (0-0)                      | 0 (0-0)                           |
| 2006 | Niger       | 3231 (2272-4245)          |                                | 113 (79-148)                      |                                        | 1553 (764-2268)            |                                 | 54 (27-79)                         |                                         | 6 (3-9)              |                           | 0 (0-0)                      | 0 (0-0)                           |
| 2007 | Niger       | 3247 (2284-4266)          |                                | 109 (77-143)                      |                                        | 1561 (771-2276)            |                                 | 52 (26-76)                         |                                         | 6 (3-9)              |                           | 0 (0-0)                      | 0 (0-0)                           |
| 2008 | Niger       | 3019 (2123-3967)          |                                | 98 (69-128)                       |                                        | 1450 (498-2323)            |                                 | 47 (16-75)                         |                                         | 6 (2-9)              |                           | 0 (0-0)                      | 0 (0-0)                           |
| 2009 | Niger       | 804 (565-1056)            |                                | 25 (18-33)                        |                                        | 386 (134-617)              |                                 | 12 (4-19)                          |                                         | 2 (1-3)              |                           | 0 (0-0)                      | 0 (0-0)                           |
| 2010 | Niger       | 339 (239-446)             |                                | 10 (7-13)                         |                                        | 162 (57-259)               |                                 | 5 (2-8)                            |                                         | 1 (0-1)              |                           | 0 (0-0)                      | 0 (0-0)                           |
| 2011 | Niger       | 310 (218-408)             |                                | 9 (6-12)                          |                                        | 148 (52-235)               |                                 | 4 (1-7)                            |                                         | 1 (0-1)              |                           | 0 (0-0)                      | 0 (0-0)                           |
| 2012 | Niger       | 330 (232-433)             |                                | 9 (6-12)                          |                                        | 156 (55-248)               |                                 | 4 (2-7)                            |                                         | 1 (0-1)              |                           | 0 (0-0)                      | 0 (0-0)                           |
| 2013 | Niger       | 344 (242-452)             |                                | 9 (6-12)                          |                                        | 162 (58-257)               |                                 | 4 (2-7)                            |                                         | 1 (0-1)              |                           | 0 (0-0)                      | 0 (0-0)                           |
| 2014 | Niger       | 29 (20-38)                |                                | 1 (1-1)                           |                                        | 14 (5-22)                  |                                 | 0 (0-1)                            |                                         | 0 (0-0)              |                           | 0 (0-0)                      | 0 (0-0)                           |
| 2015 | Niger       | 361 (254-474)             | 1 (1-1)                        | 9 (6-12)                          | 0 (0-0)                                | 168 (62-266)               | 1 (0-1)                         | 4 (2-7)                            | 0 (0-0)                                 | 1 (0-1)              | 0 (0-0)                   | 0 (0-0)                      | 0 (0-0)                           |
| 2000 | Nigeria     | 19556 (13754-25696)       |                                | 94 (66-124)                       |                                        | 6702 (2982-10081)          |                                 | 32 (14-49)                         |                                         | 27 (12-41)           |                           | 0 (0-0)                      | 0 (0-0)                           |
| 2001 | Nigeria     | 19914 (14006-26165)       |                                | 93 (65-122)                       |                                        | 6747 (3034-10114)          |                                 | 32 (14-47)                         |                                         | 28 (12-41)           |                           | 0 (0-0)                      | 0 (0-0)                           |
| 2002 | Nigeria     | 20165 (14183-26496)       |                                | 91 (64-120)                       |                                        | 6710 (3051-10026)          |                                 | 30 (14-45)                         |                                         | 27 (12-41)           |                           | 0 (0-0)                      | 0 (0-0)                           |
| 2003 | Nigeria     | 19997 (14065-26275)       |                                | 88 (62-116)                       |                                        | 6479 (2979-9650)           |                                 | 29 (13-43)                         |                                         | 26 (12-39)           |                           | 0 (0-0)                      | 0 (0-0)                           |
| 2004 | Nigeria     | 20168 (14185-26500)       |                                | 87 (61-114)                       |                                        | 6338 (2948-9409)           |                                 | 27 (13-40)                         |                                         | 26 (12-38)           |                           | 0 (0-0)                      | 0 (0-0)                           |
| 2005 | Nigeria     | 20206 (14211-26549)       |                                | 84 (59-111)                       |                                        | 6193 (2914-9163)           |                                 | 26 (12-38)                         |                                         | 25 (12-37)           |                           | 0 (0-0)                      | 0 (0-0)                           |
| 2006 | Nigeria     | 20689 (14551-27184)       |                                | 84 (59-110)                       |                                        | 6203 (2953-9143)           |                                 | 25 (12-37)                         |                                         | 25 (12-37)           |                           | 0 (0-0)                      | 0 (0-0)                           |
| 2007 | Nigeria     | 20812 (14637-27345)       |                                | 82 (58-108)                       |                                        | 6145 (2907-9935)           |                                 | 24 (8-39)                          |                                         | 25 (8-40)            |                           | 0 (0-0)                      | 0 (0-0)                           |
| 2008 | Nigeria     | 20680 (14545-27172)       |                                | 80 (56-105)                       |                                        | 6042 (2811-9717)           |                                 | 23 (8-37)                          |                                         | 25 (8-40)            |                           | 0 (0-0)                      | 0 (0-0)                           |
| 2009 | Nigeria     | 20937 (14725-27509)       |                                | 79 (55-104)                       |                                        | 6057 (1987-9777)           |                                 | 23 (7-37)                          |                                         | 25 (8-40)            |                           | 0 (0-0)                      | 0 (0-0)                           |
| 2010 | Nigeria     | 21510 (15129-28263)       |                                | 79 (56-104)                       |                                        | 6155 (1989-9966)           |                                 | 23 (7-37)                          |                                         | 25 (8-41)            |                           | 0 (0-0)                      | 0 (0-0)                           |
| 2011 | Nigeria     | 21551 (15157-28316)       |                                | 77 (54-101)                       |                                        | 6110 (1945-9920)           |                                 | 22 (7-36)                          |                                         | 25 (8-40)            |                           | 0 (0-0)                      | 0 (0-0)                           |
| 2012 | Nigeria     | 20087 (14128-26393)       |                                | 70 (49-92)                        |                                        | 5659 (1766-9222)           |                                 | 20 (6-32)                          |                                         | 23 (7-38)            |                           | 0 (0-0)                      | 0 (0-0)                           |
| 2013 | Nigeria     | 3339 (2349-4388)          |                                | 11 (8-15)                         |                                        | 939 (287-1536)             |                                 | 3 (1-5)                            |                                         | 4 (1-6)              |                           | 0 (0-0)                      | 0 (0-0)                           |
| 2014 | Nigeria     | 3139 (2264-4125)          |                                | 10 (7-14)                         |                                        | 884 (265-1451)             |                                 | 3 (1-5)                            |                                         | 4 (1-6)              |                           | 0 (0-0)                      | 0 (0-0)                           |
| 2015 | Nigeria     | 2837 (1998-3728)          | 101 (71-132)                   | 9 (7-12)                          | 0 (0-0)                                | 800 (236-1317)             | 28 (8-47)                       | 3 (1-4)                            | 0 (0-0)                                 | 3 (1-5)              | 0 (0-0)                   | 0 (0-0)                      | 0 (0-0)                           |
| 2000 | Niue        | 0 (0-0)                   |                                | 5 (4-7)                           |                                        | 0 (0-0)                    |                                 | 3 (2-5)                            |                                         | 0 (0-0)              |                           | 0 (0-0)                      | 0 (0-0)                           |
| 2001 | Niue        | 0 (0-0)                   |                                | 2 (1-3)                           |                                        | 0 (0-0)                    |                                 | 1 (1-2)                            |                                         | 0 (0-0)              |                           | 0 (0-0)                      | 0 (0-0)                           |
| 2002 | Niue        | 0 (0-0)                   |                                | 2 (1-3)                           |                                        | 0 (0-0)                    |                                 | 1 (1-2)                            |                                         | 0 (0-0)              |                           | 0 (0-0)                      | 0 (0-0)                           |
| 2003 | Niue        | 0 (0-0)                   |                                | 2 (1-3)                           |                                        | 0 (0-0)                    |                                 | 1 (1-2)                            |                                         | 0 (0-0)              |                           | 0 (0-0)                      | 0 (0-0)                           |
| 2004 | Niue        | 0 (0-0)                   |                                | 0 (0-0)                           |                                        | 0 (0-0)                    |                                 | 0 (0-0)                            |                                         | 0 (0-0)              |                           | 0 (0-0)                      | 0 (0-0)                           |
| 2005 | Niue        | 0 (0-0)                   |                                | 0 (0-0)                           |                                        | 0 (0-0)                    |                                 | 0 (0-0)                            |                                         | 0 (0-0)              |                           | 0 (0-0)                      | 0 (0-0)                           |
| 2006 | Niue        | 0 (0-0)                   |                                | 0 (0-0)                           |                                        | 0 (0-0)                    |                                 | 0 (0-0)                            |                                         | 0 (0-0)              |                           | 0 (0-0)                      | 0 (0-0)                           |
| 2007 | Niue        | 0 (0-0)                   |                                | 0 (0-0)                           |                                        | 0 (0-0)                    |                                 | 0 (0-0)                            |                                         | 0 (0-0)              |                           | 0 (0-0)                      | 0 (0-0)                           |
| 2008 | Niue        | 0 (0-0)                   |                                | 0 (0-0)                           |                                        | 0 (0-0)                    |                                 | 0 (0-0)                            |                                         | 0 (0-0)              |                           | 0 (0-0)                      | 0 (0-0)                           |
| 2009 | Niue        | 0 (0-0)                   |                                | 0 (0-1)                           |                                        | 0 (0-0)                    |                                 | 0 (0-0)                            |                                         | 0 (0-0)              |                           | 0 (0-0)                      | 0 (0-0)                           |
| 2010 | Niue        | 0 (0-0)                   |                                | 0 (0-1)                           |                                        | 0 (0-0)                    |                                 | 0 (0-0)                            |                                         | 0 (0-0)              |                           | 0 (0-0)                      | 0 (0-0)                           |
| 2011 | Niue        | 0 (0-0)                   |                                | 0 (0-0)                           |                                        | 0 (0-0)                    |                                 | 0 (0-0)                            |                                         | 0 (0-0)              |                           | 0 (0-0)                      | 0 (0-0)                           |
| 2012 | Niue        | 0 (0-0)                   |                                | 0 (0-1)                           |                                        | 0 (0-0)                    |                                 | 0 (0-0)                            |                                         | 0 (0-0)              |                           | 0 (0-0)                      | 0 (0-0)                           |
| 2013 | Niue        | 0 (0-0)                   |                                | 0 (0-1)                           |                                        | 0 (0-0)                    |                                 | 0 (0-0)                            |                                         | 0 (0-0)              |                           | 0 (0-0)                      | 0 (0-0)                           |
| 2014 | Niue        | 0 (0-0)                   |                                | 0 (0-1)                           |                                        | 0 (0-0)                    |                                 | 0 (0-0)                            |                                         | 0 (0-0)              |                           | 0 (0-0)                      | 0 (0-0)                           |
| 2015 | Niue        | 0 (0-0)                   | 0 (0-0)                        | 0 (0-1)                           | 0 (0-0)                                | 0 (0-0)                    | 0 (0-0)                         | 0 (0-0)                            | 0 (0-0)                                 | 0 (0-0)              | 0 (0-0)                   | 0 (0-0)                      | 0 (0-0)                           |
| 2000 | Norway      | 0 (0-0)                   |                                | 0 (0-0)                           |                                        | 0 (0-1)                    |                                 | 0 (0-0)                            |                                         | 0 (0-0)              |                           | 0 (0-0)                      | 0 (0-0)                           |
| 2001 | Norway      | 0 (0-0)                   |                                | 0 (0-0)                           |                                        | 0 (0-0)                    |                                 | 0 (0-0)                            |                                         | 0 (0-0)              |                           | 0 (0-0)                      | 0 (0-0)                           |
| 2002 | Norway      | 0 (0-0)                   |                                | 0 (0-0)                           |                                        | 0 (0-0)                    |                                 | 0 (0-0)                            |                                         | 0 (0-0)              |                           | 0 (0-0)                      | 0 (0-0)                           |
| 2003 | Norway      | 0 (0-0)                   |                                | 0 (0-0)                           |                                        | 0 (0-0)                    |                                 | 0 (0-0)                            |                                         | 0 (0-0)              |                           | 0 (0-0)                      | 0 (0-0)                           |
| 2004 | Norway      | 0 (0-                     |                                |                                   |                                        |                            |                                 |                                    |                                         |                      |                           |                              |                                   |

| Year | Country          | Hib pneumonia deaths (UR) | Hib pneumonia deaths, HIV (UR) | Hib pneumonia mortality rate (UR) | Hib pneumonia mortality rate, HIV (UR) | Hib meningitis deaths (UR) | Hib meningitis deaths, HIV (UR) | Hib meningitis mortality rate (UR) | Hib meningitis mortality rate, HIV (UR) | Hib NPNM deaths (UR) | Hib NPNM deaths, HIV (UR) | Hib NPNM mortality rate (UR) | Hib NPNM mortality rate, HIV (UR) |
|------|------------------|---------------------------|--------------------------------|-----------------------------------|----------------------------------------|----------------------------|---------------------------------|------------------------------------|-----------------------------------------|----------------------|---------------------------|------------------------------|-----------------------------------|
| 2007 | Norway           | 0 (0-0)                   |                                | 0 (0-0)                           |                                        | 0 (0-0)                    |                                 | 0 (0-0)                            |                                         | 0 (0-0)              |                           | 0 (0-0)                      |                                   |
| 2008 | Norway           | 0 (0-0)                   |                                | 0 (0-0)                           |                                        | 0 (0-0)                    |                                 | 0 (0-0)                            |                                         | 0 (0-0)              |                           | 0 (0-0)                      |                                   |
| 2009 | Norway           | 0 (0-0)                   |                                | 0 (0-0)                           |                                        | 0 (0-0)                    |                                 | 0 (0-0)                            |                                         | 0 (0-0)              |                           | 0 (0-0)                      |                                   |
| 2010 | Norway           | 0 (0-0)                   |                                | 0 (0-0)                           |                                        | 0 (0-0)                    |                                 | 0 (0-0)                            |                                         | 0 (0-0)              |                           | 0 (0-0)                      |                                   |
| 2011 | Norway           | 0 (0-0)                   |                                | 0 (0-0)                           |                                        | 0 (0-0)                    |                                 | 0 (0-0)                            |                                         | 0 (0-0)              |                           | 0 (0-0)                      |                                   |
| 2012 | Norway           | 0 (0-0)                   |                                | 0 (0-0)                           |                                        | 0 (0-0)                    |                                 | 0 (0-0)                            |                                         | 0 (0-0)              |                           | 0 (0-0)                      |                                   |
| 2013 | Norway           | 0 (0-0)                   |                                | 0 (0-0)                           |                                        | 0 (0-0)                    |                                 | 0 (0-0)                            |                                         | 0 (0-0)              |                           | 0 (0-0)                      |                                   |
| 2014 | Norway           | 0 (0-0)                   |                                | 0 (0-0)                           |                                        | 0 (0-0)                    |                                 | 0 (0-0)                            |                                         | 0 (0-0)              |                           | 0 (0-0)                      |                                   |
| 2015 | Norway           | 0 (0-0)                   |                                | 0 (0-0)                           |                                        | 0 (0-0)                    |                                 | 0 (0-0)                            |                                         | 0 (0-0)              |                           | 0 (0-0)                      |                                   |
| 2000 | Oman             | 18 (13-24)                |                                | 7 (5-9)                           |                                        | 2 (1-3)                    |                                 | 1 (0-1)                            |                                         | 0 (0-0)              |                           | 0 (0-0)                      |                                   |
| 2001 | Oman             | 15 (11-20)                |                                | 6 (4-8)                           |                                        | 2 (1-3)                    |                                 | 1 (0-1)                            |                                         | 0 (0-0)              |                           | 0 (0-0)                      |                                   |
| 2002 | Oman             | 2 (2-3)                   |                                | 1 (1-1)                           |                                        | 0 (0-1)                    |                                 | 0 (0-0)                            |                                         | 0 (0-0)              |                           | 0 (0-0)                      |                                   |
| 2003 | Oman             | 1 (1-1)                   |                                | 0 (0-0)                           |                                        | 0 (0-0)                    |                                 | 0 (0-0)                            |                                         | 0 (0-0)              |                           | 0 (0-0)                      |                                   |
| 2004 | Oman             | 1 (1-1)                   |                                | 0 (0-0)                           |                                        | 0 (0-0)                    |                                 | 0 (0-0)                            |                                         | 0 (0-0)              |                           | 0 (0-0)                      |                                   |
| 2005 | Oman             | 1 (1-1)                   |                                | 0 (0-0)                           |                                        | 0 (0-0)                    |                                 | 0 (0-0)                            |                                         | 0 (0-0)              |                           | 0 (0-0)                      |                                   |
| 2006 | Oman             | 1 (1-1)                   |                                | 0 (0-0)                           |                                        | 0 (0-0)                    |                                 | 0 (0-0)                            |                                         | 0 (0-0)              |                           | 0 (0-0)                      |                                   |
| 2007 | Oman             | 0 (0-0)                   |                                | 0 (0-0)                           |                                        | 0 (0-0)                    |                                 | 0 (0-0)                            |                                         | 0 (0-0)              |                           | 0 (0-0)                      |                                   |
| 2008 | Oman             | 0 (0-0)                   |                                | 0 (0-0)                           |                                        | 0 (0-0)                    |                                 | 0 (0-0)                            |                                         | 0 (0-0)              |                           | 0 (0-0)                      |                                   |
| 2009 | Oman             | 0 (0-0)                   |                                | 0 (0-0)                           |                                        | 0 (0-0)                    |                                 | 0 (0-0)                            |                                         | 0 (0-0)              |                           | 0 (0-0)                      |                                   |
| 2010 | Oman             | 0 (0-0)                   |                                | 0 (0-0)                           |                                        | 0 (0-0)                    |                                 | 0 (0-0)                            |                                         | 0 (0-0)              |                           | 0 (0-0)                      |                                   |
| 2011 | Oman             | 0 (0-0)                   |                                | 0 (0-0)                           |                                        | 0 (0-0)                    |                                 | 0 (0-0)                            |                                         | 0 (0-0)              |                           | 0 (0-0)                      |                                   |
| 2012 | Oman             | 0 (0-0)                   |                                | 0 (0-0)                           |                                        | 0 (0-0)                    |                                 | 0 (0-0)                            |                                         | 0 (0-0)              |                           | 0 (0-0)                      |                                   |
| 2013 | Oman             | 0 (0-0)                   |                                | 0 (0-0)                           |                                        | 0 (0-0)                    |                                 | 0 (0-0)                            |                                         | 0 (0-0)              |                           | 0 (0-0)                      |                                   |
| 2014 | Oman             | 0 (0-0)                   |                                | 0 (0-0)                           |                                        | 0 (0-0)                    |                                 | 0 (0-0)                            |                                         | 0 (0-0)              |                           | 0 (0-0)                      |                                   |
| 2015 | Oman             | 0 (0-0)                   |                                | 0 (0-0)                           |                                        | 0 (0-0)                    |                                 | 0 (0-0)                            |                                         | 0 (0-0)              |                           | 0 (0-0)                      |                                   |
| 2000 | Pakistan         | 11166 (7653-14671)        |                                | 56 (40-74)                        |                                        | 3622 (1463-5551)           |                                 | 18 (7-28)                          |                                         | 16 (6-23)            |                           | 0 (0-0)                      |                                   |
| 2001 | Pakistan         | 11005 (7740-14460)        |                                | 55 (39-73)                        |                                        | 3552 (1440-5438)           |                                 | 18 (7-27)                          |                                         | 14 (6-22)            |                           | 0 (0-0)                      |                                   |
| 2002 | Pakistan         | 10741 (7554-14112)        |                                | 54 (38-71)                        |                                        | 3438 (1399-5258)           |                                 | 17 (7-27)                          |                                         | 14 (6-21)            |                           | 0 (0-0)                      |                                   |
| 2003 | Pakistan         | 10575 (7437-13894)        |                                | 54 (38-71)                        |                                        | 3349 (1368-5119)           |                                 | 17 (7-26)                          |                                         | 14 (6-21)            |                           | 0 (0-0)                      |                                   |
| 2004 | Pakistan         | 10490 (7378-13784)        |                                | 53 (38-70)                        |                                        | 3287 (1347-5020)           |                                 | 17 (7-26)                          |                                         | 13 (5-20)            |                           | 0 (0-0)                      |                                   |
| 2005 | Pakistan         | 10561 (7428-13876)        |                                | 54 (38-70)                        |                                        | 3274 (1346-4996)           |                                 | 17 (7-25)                          |                                         | 13 (5-20)            |                           | 0 (0-0)                      |                                   |
| 2006 | Pakistan         | 10635 (7480-13973)        |                                | 54 (38-70)                        |                                        | 3264 (1346-4977)           |                                 | 16 (7-25)                          |                                         | 13 (5-20)            |                           | 0 (0-0)                      |                                   |
| 2007 | Pakistan         | 10774 (7578-14157)        |                                | 53 (37-70)                        |                                        | 3278 (1351-4996)           |                                 | 16 (7-25)                          |                                         | 13 (6-20)            |                           | 0 (0-0)                      |                                   |
| 2008 | Pakistan         | 10924 (7683-14354)        |                                | 52 (37-69)                        |                                        | 3303 (1349-5046)           |                                 | 16 (6-24)                          |                                         | 13 (5-21)            |                           | 0 (0-0)                      |                                   |
| 2009 | Pakistan         | 2383 (1676-3131)          |                                | 11 (8-15)                         |                                        | 717 (290-1098)             |                                 | 3 (1-5)                            |                                         | 3 (1-4)              |                           | 0 (0-0)                      |                                   |
| 2010 | Pakistan         | 1053 (740-1383)           |                                | 5 (3-6)                           |                                        | 316 (127-484)              |                                 | 1 (1-2)                            |                                         | 1 (1-2)              |                           | 0 (0-0)                      |                                   |
| 2011 | Pakistan         | 1203 (846-1580)           |                                | 5 (4-7)                           |                                        | 359 (143-552)              |                                 | 2 (1-2)                            |                                         | 1 (1-2)              |                           | 0 (0-0)                      |                                   |
| 2012 | Pakistan         | 1220 (856-1603)           |                                | 5 (4-7)                           |                                        | 363 (143-559)              |                                 | 2 (1-2)                            |                                         | 1 (1-2)              |                           | 0 (0-0)                      |                                   |
| 2013 | Pakistan         | 1195 (840-1570)           |                                | 5 (4-7)                           |                                        | 354 (140-546)              |                                 | 1 (1-2)                            |                                         | 1 (1-2)              |                           | 0 (0-0)                      |                                   |
| 2014 | Pakistan         | 103 (72-135)              |                                | 0 (0-1)                           |                                        | 30 (12-47)                 |                                 | 0 (0-0)                            |                                         | 0 (0-0)              |                           | 0 (0-0)                      |                                   |
| 2015 | Pakistan         | 100 (71-132)              |                                | 0 (0-1)                           |                                        | 30 (12-46)                 |                                 | 0 (0-0)                            |                                         | 0 (0-0)              |                           | 0 (0-0)                      |                                   |
| 2000 | Palau            | 0 (0-0)                   |                                | 1 (0-1)                           |                                        | 0 (0-0)                    |                                 | 1 (0-1)                            |                                         | 0 (0-0)              |                           | 0 (0-0)                      |                                   |
| 2001 | Palau            | 0 (0-0)                   |                                | 1 (0-1)                           |                                        | 0 (0-0)                    |                                 | 1 (0-1)                            |                                         | 0 (0-0)              |                           | 0 (0-0)                      |                                   |
| 2002 | Palau            | 0 (0-0)                   |                                | 1 (1-1)                           |                                        | 0 (0-0)                    |                                 | 1 (0-1)                            |                                         | 0 (0-0)              |                           | 0 (0-0)                      |                                   |
| 2003 | Palau            | 0 (0-0)                   |                                | 0 (0-0)                           |                                        | 0 (0-0)                    |                                 | 0 (0-0)                            |                                         | 0 (0-0)              |                           | 0 (0-0)                      |                                   |
| 2004 | Palau            | 0 (0-0)                   |                                | 0 (0-0)                           |                                        | 0 (0-0)                    |                                 | 0 (0-0)                            |                                         | 0 (0-0)              |                           | 0 (0-0)                      |                                   |
| 2005 | Palau            | 0 (0-0)                   |                                | 0 (0-0)                           |                                        | 0 (0-0)                    |                                 | 0 (0-0)                            |                                         | 0 (0-0)              |                           | 0 (0-0)                      |                                   |
| 2006 | Palau            | 0 (0-0)                   |                                | 0 (0-0)                           |                                        | 0 (0-0)                    |                                 | 0 (0-0)                            |                                         | 0 (0-0)              |                           | 0 (0-0)                      |                                   |
| 2007 | Palau            | 0 (0-0)                   |                                | 0 (0-0)                           |                                        | 0 (0-0)                    |                                 | 0 (0-0)                            |                                         | 0 (0-0)              |                           | 0 (0-0)                      |                                   |
| 2008 | Palau            | 0 (0-0)                   |                                | 0 (0-0)                           |                                        | 0 (0-0)                    |                                 | 0 (0-0)                            |                                         | 0 (0-0)              |                           | 0 (0-0)                      |                                   |
| 2009 | Palau            | 0 (0-0)                   |                                | 0 (0-0)                           |                                        | 0 (0-0)                    |                                 | 0 (0-0)                            |                                         | 0 (0-0)              |                           | 0 (0-0)                      |                                   |
| 2010 | Palau            | 0 (0-0)                   |                                | 0 (0-0)                           |                                        | 0 (0-0)                    |                                 | 0 (0-0)                            |                                         | 0 (0-0)              |                           | 0 (0-0)                      |                                   |
| 2011 | Palau            | 0 (0-0)                   |                                | 0 (0-0)                           |                                        | 0 (0-0)                    |                                 | 0 (0-0)                            |                                         | 0 (0-0)              |                           | 0 (0-0)                      |                                   |
| 2012 | Palau            | 0 (0-0)                   |                                | 0 (0-0)                           |                                        | 0 (0-0)                    |                                 | 0 (0-0)                            |                                         | 0 (0-0)              |                           | 0 (0-0)                      |                                   |
| 2013 | Palau            | 0 (0-0)                   |                                | 0 (0-0)                           |                                        | 0 (0-0)                    |                                 | 0 (0-0)                            |                                         | 0 (0-0)              |                           | 0 (0-0)                      |                                   |
| 2014 | Palau            | 0 (0-0)                   |                                | 0 (0-0)                           |                                        | 0 (0-0)                    |                                 | 0 (0-0)                            |                                         | 0 (0-0)              |                           | 0 (0-0)                      |                                   |
| 2015 | Palau            | 0 (0-0)                   |                                | 0 (0-0)                           |                                        | 0 (0-0)                    |                                 | 0 (0-0)                            |                                         | 0 (0-0)              |                           | 0 (0-0)                      |                                   |
| 2000 | Panama           | 19 (14-26)                |                                | 6 (4-8)                           |                                        | 10 (2-17)                  |                                 | 3 (0-5)                            |                                         | 0 (0-0)              |                           | 0 (0-0)                      |                                   |
| 2001 | Panama           | 3 (2-4)                   |                                | 1 (1-1)                           |                                        | 2 (0-4)                    |                                 | 1 (0-1)                            |                                         | 0 (0-0)              |                           | 0 (0-0)                      |                                   |
| 2002 | Panama           | 1 (1-2)                   |                                | 0 (0-0)                           |                                        | 1 (0-1)                    |                                 | 0 (0-0)                            |                                         | 0 (0-0)              |                           | 0 (0-0)                      |                                   |
| 2003 | Panama           | 2 (1-2)                   |                                | 0 (0-1)                           |                                        | 0 (0-1)                    |                                 | 0 (0-0)                            |                                         | 0 (0-0)              |                           | 0 (0-0)                      |                                   |
| 2004 | Panama           | 2 (1-2)                   |                                | 0 (0-1)                           |                                        | 1 (0-2)                    |                                 | 0 (0-0)                            |                                         | 0 (0-0)              |                           | 0 (0-0)                      |                                   |
| 2005 | Panama           | 2 (2-3)                   |                                | 1 (0-1)                           |                                        | 1 (0-1)                    |                                 | 0 (0-0)                            |                                         | 0 (0-0)              |                           | 0 (0-0)                      |                                   |
| 2006 | Panama           | 0 (0-0)                   |                                | 0 (0-0)                           |                                        | 0 (0-0)                    |                                 | 0 (0-0)                            |                                         | 0 (0-0)              |                           | 0 (0-0)                      |                                   |
| 2007 | Panama           | 0 (0-0)                   |                                | 0 (0-0)                           |                                        | 0 (0-0)                    |                                 | 0 (0-0)                            |                                         | 0 (0-0)              |                           | 0 (0-0)                      |                                   |
| 2008 | Panama           | 0 (0-0)                   |                                | 0 (0-0)                           |                                        | 0 (0-0)                    |                                 | 0 (0-0)                            |                                         | 0 (0-0)              |                           | 0 (0-0)                      |                                   |
| 2009 | Panama           | 0 (0-0)                   |                                | 0 (0-0)                           |                                        | 0 (0-0)                    |                                 | 0 (0-0)                            |                                         | 0 (0-0)              |                           | 0 (0-0)                      |                                   |
| 2010 | Panama           | 0 (0-1)                   |                                | 0 (0-0)                           |                                        | 0 (0-0)                    |                                 | 0 (0-0)                            |                                         | 0 (0-0)              |                           | 0 (0-0)                      |                                   |
| 2011 | Panama           | 0 (0-1)                   |                                | 0 (0-0)                           |                                        | 0 (0-0)                    |                                 | 0 (0-0)                            |                                         | 0 (0-0)              |                           | 0 (0-0)                      |                                   |
| 2012 | Panama           | 0 (0-0)                   |                                | 0 (0-0)                           |                                        | 0 (0-0)                    |                                 | 0 (0-0)                            |                                         | 0 (0-0)              |                           | 0 (0-0)                      |                                   |
| 2013 | Panama           | 0 (0-0)                   |                                | 0 (0-0)                           |                                        | 0 (0-0)                    |                                 | 0 (0-0)                            |                                         | 0 (0-0)              |                           | 0 (0-0)                      |                                   |
| 2014 | Panama           | 0 (0-1)                   |                                | 0 (0-0)                           |                                        | 0 (0-0)                    |                                 | 0 (0-0)                            |                                         | 0 (0-0)              |                           | 0 (0-0)                      |                                   |
| 2015 | Panama           | 0 (0-1)                   |                                | 0 (0-0)                           |                                        | 0 (0-0)                    |                                 | 0 (0-0)                            |                                         | 0 (0-0)              |                           | 0 (0-0)                      |                                   |
| 2000 | Papua New Guinea | 425 (299-558)             |                                | 52 (36-68)                        |                                        | 232 (118-299)              |                                 | 28 (14-36)                         |                                         | 1 (0-1)              |                           | 0 (0-0)                      |                                   |
| 2001 | Papua New Guinea | 432 (304-568)             |                                | 51 (36-67)                        |                                        | 238 (121-307)              |                                 | 28 (14-36)                         |                                         | 1 (0-1)              |                           | 0 (0-0)                      |                                   |
| 2002 | Papua New Guinea | 435 (306-571)             |                                | 51 (36-67)                        |                                        | 241 (123-310)              |                                 | 28 (14-36)                         |                                         | 1 (1-1)              |                           | 0 (0-0)                      |                                   |
| 2003 | Papua New Guinea | 435 (306-571)             |                                | 50 (35-66)                        |                                        | 242 (124-311)              |                                 | 28 (14-36)                         |                                         | 1 (1-1)              |                           | 0 (0-0)                      |                                   |
| 2004 | Papua New Guinea | 436 (307-573)             |                                | 50 (35-65)                        |                                        | 243 (124-313)              |                                 | 28 (14-36)                         |                                         | 1 (1-1)              |                           | 0 (0-0)                      |                                   |
| 2005 | Papua New Guinea | 438 (308-575)             |                                | 49 (35-65)                        |                                        | 243 (116-316)              |                                 | 27 (13-36)                         |                                         | 2 (1-3)              |                           | 0 (0-0)                      |                                   |
| 2006 | Papua New Guinea | 438 (308-575)             |                                | 49 (34-64)                        |                                        | 241 (116-314)              |                                 | 27 (13-35)                         |                                         | 2 (1-3)              |                           | 0 (0-0)                      |                                   |
| 2007 | Papua New Guinea | 439 (309-577)             |                                | 48 (34-64)                        |                                        | 240 (115-312)              |                                 | 26 (13-34)                         |                                         | 2 (1-2)              |                           | 0 (0-0)                      |                                   |
| 2008 | Papua New Guinea | 437 (307-574)             |                                | 47 (33-62)                        |                                        | 235 (114-306)              |                                 | 26 (12-33)                         |                                         | 2 (1-2)              |                           | 0 (0-0)                      |                                   |
| 2009 | Papua New Guinea | 168 (118-220)             |                                | 18 (13-24)                        |                                        | 89 (43-116)                |                                 | 10 (5-12)                          |                                         | 1 (0-1)              |                           | 0 (0-0)                      |                                   |
| 2010 | Papua New Guinea | 50 (42-78)                |                                | 6 (4-8)                           |                                        | 31 (15-41)                 |                                 | 3 (2-4)                            |                                         | 0 (0-0)              |                           | 0 (0-0)                      |                                   |
| 2011 | Papua New Guinea | 55 (39-73)                |                                | 6 (4-8)                           |                                        | 29 (14-37)                 |                                 | 3 (1-4)                            |                                         | 0 (0-0)              |                           | 0 (0-0)                      |                                   |
| 2012 | Papua New Guinea | 53 (37-69)                |                                | 5 (4-7)                           |                                        | 27 (13-35)                 |                                 | 3 (1-4)                            |                                         | 0 (0-0)              |                           | 0 (0-0)                      |                                   |
| 2013 | Papua New Guinea | 48 (34-64)                |                                | 5 (4-7)                           |                                        | 25 (12-32)                 |                                 | 3 (1-3)                            |                                         | 0 (0-0)              |                           | 0 (0-0)                      |                                   |
| 2014 | Papua New Guinea | 51 (36-67)                |                                | 5 (4-7)                           |                                        | 26 (13-34)                 |                                 | 3 (1-3)                            |                                         | 0 (0-0)              |                           | 0 (0-0)                      |                                   |

Hib = *Haemophilus influenzae* type b; npnm = non-pneumonia, non-meningitis; HIV = deaths only in HIV-infected children; Uncertainty range provided in parentheses.



| Year | Country          | Hib pneumonia deaths (UR) | Hib pneumonia deaths, HIV (UR) | Hib pneumonia mortality rate (UR) | Hib pneumonia mortality rate, HIV (UR) | Hib meningitis deaths (UR) | Hib meningitis deaths, HIV (UR) | Hib meningitis mortality rate (UR) | Hib meningitis mortality rate, HIV (UR) | Hib NPNM deaths (UR) | Hib NPNM deaths, HIV (UR) | Hib NPNM mortality rate (UR) | Hib NPNM mortality rate, HIV (UR) |
|------|------------------|---------------------------|--------------------------------|-----------------------------------|----------------------------------------|----------------------------|---------------------------------|------------------------------------|-----------------------------------------|----------------------|---------------------------|------------------------------|-----------------------------------|
| 2015 | Papua New Guinea | 49 (35-65)                | 0 (0-1)                        | 5 (4-7)                           | 0 (0-0)                                | 25 (12-32)                 | 0 (0-0)                         | 3 (1-3)                            | 0 (0-0)                                 | 0 (0-0)              | 0 (0-0)                   | 0 (0-0)                      | 0 (0-0)                           |
| 2000 | Paraguay         | 104 (73-136)              |                                | 15 (11-20)                        |                                        | 23 (11-36)                 |                                 | 3 (2-5)                            |                                         | 0 (0-0)              |                           | 0 (0-0)                      | 0 (0-0)                           |
| 2001 | Paraguay         | 99 (69-129)               |                                | 14 (10-19)                        |                                        | 21 (11-34)                 |                                 | 3 (2-5)                            |                                         | 0 (0-0)              |                           | 0 (0-0)                      | 0 (0-0)                           |
| 2002 | Paraguay         | 92 (65-121)               |                                | 13 (9-18)                         |                                        | 20 (10-32)                 |                                 | 3 (1-5)                            |                                         | 0 (0-0)              |                           | 0 (0-0)                      | 0 (0-0)                           |
| 2003 | Paraguay         | 15 (11-20)                |                                | 2 (2-3)                           |                                        | 5 (3-9)                    |                                 | 1 (0-1)                            |                                         | 0 (0-0)              |                           | 0 (0-0)                      | 0 (0-0)                           |
| 2004 | Paraguay         | 7 (5-9)                   |                                | 1 (1-1)                           |                                        | 2 (1-3)                    |                                 | 0 (0-0)                            |                                         | 0 (0-0)              |                           | 0 (0-0)                      | 0 (0-0)                           |
| 2005 | Paraguay         | 7 (5-9)                   |                                | 1 (1-1)                           |                                        | 2 (1-3)                    |                                 | 0 (0-0)                            |                                         | 0 (0-0)              |                           | 0 (0-0)                      | 0 (0-0)                           |
| 2006 | Paraguay         | 7 (5-9)                   |                                | 1 (1-1)                           |                                        | 2 (1-3)                    |                                 | 0 (0-0)                            |                                         | 0 (0-0)              |                           | 0 (0-0)                      | 0 (0-0)                           |
| 2007 | Paraguay         | 7 (5-9)                   |                                | 1 (1-1)                           |                                        | 2 (1-3)                    |                                 | 0 (0-0)                            |                                         | 0 (0-0)              |                           | 0 (0-0)                      | 0 (0-0)                           |
| 2008 | Paraguay         | 1 (1-1)                   |                                | 0 (0-0)                           |                                        | 0 (0-0)                    |                                 | 0 (0-0)                            |                                         | 0 (0-0)              |                           | 0 (0-0)                      | 0 (0-0)                           |
| 2009 | Paraguay         | 1 (1-1)                   |                                | 0 (0-0)                           |                                        | 0 (0-0)                    |                                 | 0 (0-0)                            |                                         | 0 (0-0)              |                           | 0 (0-0)                      | 0 (0-0)                           |
| 2010 | Paraguay         | 1 (1-1)                   |                                | 0 (0-0)                           |                                        | 0 (0-0)                    |                                 | 0 (0-0)                            |                                         | 0 (0-0)              |                           | 0 (0-0)                      | 0 (0-0)                           |
| 2011 | Paraguay         | 1 (0-1)                   |                                | 0 (0-0)                           |                                        | 0 (0-0)                    |                                 | 0 (0-0)                            |                                         | 0 (0-0)              |                           | 0 (0-0)                      | 0 (0-0)                           |
| 2012 | Paraguay         | 1 (1-1)                   |                                | 0 (0-0)                           |                                        | 0 (0-0)                    |                                 | 0 (0-0)                            |                                         | 0 (0-0)              |                           | 0 (0-0)                      | 0 (0-0)                           |
| 2013 | Paraguay         | 1 (1-1)                   |                                | 0 (0-0)                           |                                        | 0 (0-0)                    |                                 | 0 (0-0)                            |                                         | 0 (0-0)              |                           | 0 (0-0)                      | 0 (0-0)                           |
| 2014 | Paraguay         | 1 (0-1)                   |                                | 0 (0-0)                           |                                        | 0 (0-0)                    |                                 | 0 (0-0)                            |                                         | 0 (0-0)              |                           | 0 (0-0)                      | 0 (0-0)                           |
| 2015 | Paraguay         | 1 (0-1)                   | 0 (0-0)                        | 0 (0-0)                           | 0 (0-0)                                | 0 (0-0)                    | 0 (0-0)                         | 0 (0-0)                            | 0 (0-0)                                 | 0 (0-0)              | 0 (0-0)                   | 0 (0-0)                      | 0 (0-0)                           |
| 2000 | Peru             | 114 (80-149)              |                                | 4 (3-5)                           |                                        | 56 (17-94)                 |                                 | 2 (1-3)                            |                                         | 0 (0-1)              |                           | 0 (0-0)                      | 0 (0-0)                           |
| 2001 | Peru             | 132 (93-173)              |                                | 4 (3-6)                           |                                        | 63 (19-104)                |                                 | 2 (1-4)                            |                                         | 1 (0-1)              |                           | 0 (0-0)                      | 0 (0-0)                           |
| 2002 | Peru             | 91 (64-119)               |                                | 3 (2-4)                           |                                        | 44 (14-72)                 |                                 | 2 (0-2)                            |                                         | 0 (0-1)              |                           | 0 (0-0)                      | 0 (0-0)                           |
| 2003 | Peru             | 80 (56-105)               |                                | 3 (2-4)                           |                                        | 38 (12-63)                 |                                 | 1 (0-2)                            |                                         | 0 (0-0)              |                           | 0 (0-0)                      | 0 (0-0)                           |
| 2004 | Peru             | 4 (3-6)                   |                                | 0 (0-0)                           |                                        | 2 (0-4)                    |                                 | 0 (0-0)                            |                                         | 0 (0-0)              |                           | 0 (0-0)                      | 0 (0-0)                           |
| 2005 | Peru             | 4 (3-5)                   |                                | 0 (0-0)                           |                                        | 2 (0-4)                    |                                 | 0 (0-0)                            |                                         | 0 (0-0)              |                           | 0 (0-0)                      | 0 (0-0)                           |
| 2006 | Peru             | 4 (3-5)                   |                                | 0 (0-0)                           |                                        | 2 (0-3)                    |                                 | 0 (0-0)                            |                                         | 0 (0-0)              |                           | 0 (0-0)                      | 0 (0-0)                           |
| 2007 | Peru             | 3 (2-4)                   |                                | 0 (0-0)                           |                                        | 2 (0-3)                    |                                 | 0 (0-0)                            |                                         | 0 (0-0)              |                           | 0 (0-0)                      | 0 (0-0)                           |
| 2008 | Peru             | 3 (2-4)                   |                                | 0 (0-0)                           |                                        | 2 (0-3)                    |                                 | 0 (0-0)                            |                                         | 0 (0-0)              |                           | 0 (0-0)                      | 0 (0-0)                           |
| 2009 | Peru             | 3 (2-4)                   |                                | 0 (0-0)                           |                                        | 1 (0-2)                    |                                 | 0 (0-0)                            |                                         | 0 (0-0)              |                           | 0 (0-0)                      | 0 (0-0)                           |
| 2010 | Peru             | 3 (2-4)                   |                                | 0 (0-0)                           |                                        | 1 (0-2)                    |                                 | 0 (0-0)                            |                                         | 0 (0-0)              |                           | 0 (0-0)                      | 0 (0-0)                           |
| 2011 | Peru             | 3 (2-3)                   |                                | 0 (0-0)                           |                                        | 1 (0-2)                    |                                 | 0 (0-0)                            |                                         | 0 (0-0)              |                           | 0 (0-0)                      | 0 (0-0)                           |
| 2012 | Peru             | 3 (2-3)                   |                                | 0 (0-0)                           |                                        | 1 (0-2)                    |                                 | 0 (0-0)                            |                                         | 0 (0-0)              |                           | 0 (0-0)                      | 0 (0-0)                           |
| 2013 | Peru             | 3 (2-3)                   |                                | 0 (0-0)                           |                                        | 1 (0-2)                    |                                 | 0 (0-0)                            |                                         | 0 (0-0)              |                           | 0 (0-0)                      | 0 (0-0)                           |
| 2014 | Peru             | 3 (2-3)                   |                                | 0 (0-0)                           |                                        | 1 (0-2)                    |                                 | 0 (0-0)                            |                                         | 0 (0-0)              |                           | 0 (0-0)                      | 0 (0-0)                           |
| 2015 | Peru             | 2 (2-3)                   | 0 (0-0)                        | 0 (0-0)                           | 0 (0-0)                                | 1 (0-2)                    | 0 (0-0)                         | 0 (0-0)                            | 0 (0-0)                                 | 0 (0-0)              | 0 (0-0)                   | 0 (0-0)                      | 0 (0-0)                           |
| 2000 | Philippines      | 2475 (1741-3252)          |                                | 23 (16-31)                        |                                        | 735 (247-1176)             |                                 | 7 (2-11)                           |                                         | 6 (2-9)              |                           | 0 (0-0)                      | 0 (0-0)                           |
| 2001 | Philippines      | 2444 (1719-3212)          |                                | 23 (16-30)                        |                                        | 721 (240-1156)             |                                 | 7 (2-11)                           |                                         | 6 (2-9)              |                           | 0 (0-0)                      | 0 (0-0)                           |
| 2002 | Philippines      | 2406 (1692-3161)          |                                | 22 (16-29)                        |                                        | 704 (232-1131)             |                                 | 6 (2-10)                           |                                         | 6 (2-9)              |                           | 0 (0-0)                      | 0 (0-0)                           |
| 2003 | Philippines      | 2378 (1672-3124)          |                                | 21 (15-28)                        |                                        | 690 (226-1112)             |                                 | 6 (2-10)                           |                                         | 6 (2-9)              |                           | 0 (0-0)                      | 0 (0-0)                           |
| 2004 | Philippines      | 2339 (1644-3071)          |                                | 21 (15-27)                        |                                        | 673 (216-1096)             |                                 | 6 (2-10)                           |                                         | 5 (2-9)              |                           | 0 (0-0)                      | 0 (0-0)                           |
| 2005 | Philippines      | 2229 (1587-2928)          |                                | 20 (14-26)                        |                                        | 636 (204-1027)             |                                 | 6 (2-9)                            |                                         | 5 (2-8)              |                           | 0 (0-0)                      | 0 (0-0)                           |
| 2006 | Philippines      | 2213 (1556-2907)          |                                | 20 (14-26)                        |                                        | 624 (198-1010)             |                                 | 6 (2-9)                            |                                         | 5 (2-8)              |                           | 0 (0-0)                      | 0 (0-0)                           |
| 2007 | Philippines      | 2145 (1508-2818)          |                                | 19 (14-26)                        |                                        | 598 (188-969)              |                                 | 5 (2-9)                            |                                         | 5 (2-8)              |                           | 0 (0-0)                      | 0 (0-0)                           |
| 2008 | Philippines      | 2081 (1464-2735)          |                                | 19 (14-25)                        |                                        | 573 (179-931)              |                                 | 5 (2-9)                            |                                         | 5 (1-7)              |                           | 0 (0-0)                      | 0 (0-0)                           |
| 2009 | Philippines      | 2018 (1419-2652)          |                                | 19 (13-25)                        |                                        | 548 (175-886)              |                                 | 5 (2-8)                            |                                         | 4 (1-7)              |                           | 0 (0-0)                      | 0 (0-0)                           |
| 2010 | Philippines      | 1950 (1371-2562)          |                                | 18 (13-24)                        |                                        | 523 (172-842)              |                                 | 5 (2-8)                            |                                         | 4 (1-7)              |                           | 0 (0-0)                      | 0 (0-0)                           |
| 2011 | Philippines      | 1535 (1090-2017)          |                                | 14 (10-19)                        |                                        | 408 (138-655)              |                                 | 4 (1-6)                            |                                         | 3 (1-5)              |                           | 0 (0-0)                      | 0 (0-0)                           |
| 2012 | Philippines      | 1096 (771-1441)           |                                | 10 (7-13)                         |                                        | 289 (101-463)              |                                 | 3 (1-4)                            |                                         | 2 (1-4)              |                           | 0 (0-0)                      | 0 (0-0)                           |
| 2013 | Philippines      | 140 (88-184)              |                                | 1 (1-2)                           |                                        | 37 (5-62)                  |                                 | 0 (0-1)                            |                                         | 0 (0-0)              |                           | 0 (0-0)                      | 0 (0-0)                           |
| 2014 | Philippines      | 186 (131-244)             |                                | 2 (1-2)                           |                                        | 48 (7-82)                  |                                 | 0 (0-1)                            |                                         | 0 (0-1)              |                           | 0 (0-0)                      | 0 (0-0)                           |
| 2015 | Philippines      | 241 (169-316)             | 0 (0-0)                        | 2 (2-3)                           | 0 (0-0)                                | 62 (10-104)                | 0 (0-0)                         | 1 (0-1)                            | 0 (0-0)                                 | 0 (0-1)              | 0 (0-0)                   | 0 (0-0)                      | 0 (0-0)                           |
| 2000 | Poland           | 24 (17-31)                |                                | 1 (1-2)                           |                                        | 8 (4-15)                   |                                 | 0 (0-1)                            |                                         | 0 (0-0)              |                           | 0 (0-0)                      | 0 (0-0)                           |
| 2001 | Poland           | 19 (14-26)                |                                | 1 (1-1)                           |                                        | 7 (3-13)                   |                                 | 0 (0-1)                            |                                         | 0 (0-0)              |                           | 0 (0-0)                      | 0 (0-0)                           |
| 2002 | Poland           | 15 (10-19)                |                                | 1 (1-1)                           |                                        | 5 (2-9)                    |                                 | 0 (0-1)                            |                                         | 0 (0-0)              |                           | 0 (0-0)                      | 0 (0-0)                           |
| 2003 | Poland           | 17 (12-22)                |                                | 1 (1-1)                           |                                        | 6 (2-10)                   |                                 | 0 (0-1)                            |                                         | 0 (0-0)              |                           | 0 (0-0)                      | 0 (0-0)                           |
| 2004 | Poland           | 18 (13-24)                |                                | 1 (1-1)                           |                                        | 5 (2-9)                    |                                 | 0 (0-1)                            |                                         | 0 (0-0)              |                           | 0 (0-0)                      | 0 (0-0)                           |
| 2005 | Poland           | 16 (11-21)                |                                | 1 (1-1)                           |                                        | 4 (2-8)                    |                                 | 0 (0-0)                            |                                         | 0 (0-0)              |                           | 0 (0-0)                      | 0 (0-0)                           |
| 2006 | Poland           | 8 (5-10)                  |                                | 0 (0-1)                           |                                        | 3 (1-6)                    |                                 | 0 (0-0)                            |                                         | 0 (0-0)              |                           | 0 (0-0)                      | 0 (0-0)                           |
| 2007 | Poland           | 2 (1-3)                   |                                | 0 (0-0)                           |                                        | 1 (0-1)                    |                                 | 0 (0-0)                            |                                         | 0 (0-0)              |                           | 0 (0-0)                      | 0 (0-0)                           |
| 2008 | Poland           | 1 (1-2)                   |                                | 0 (0-0)                           |                                        | 1 (0-1)                    |                                 | 0 (0-0)                            |                                         | 0 (0-0)              |                           | 0 (0-0)                      | 0 (0-0)                           |
| 2009 | Poland           | 1 (1-2)                   |                                | 0 (0-0)                           |                                        | 0 (0-1)                    |                                 | 0 (0-0)                            |                                         | 0 (0-0)              |                           | 0 (0-0)                      | 0 (0-0)                           |
| 2010 | Poland           | 0 (0-0)                   |                                | 0 (0-0)                           |                                        | 0 (0-0)                    |                                 | 0 (0-0)                            |                                         | 0 (0-0)              |                           | 0 (0-0)                      | 0 (0-0)                           |
| 2011 | Poland           | 0 (0-0)                   |                                | 0 (0-0)                           |                                        | 0 (0-0)                    |                                 | 0 (0-0)                            |                                         | 0 (0-0)              |                           | 0 (0-0)                      | 0 (0-0)                           |
| 2012 | Poland           | 0 (0-0)                   |                                | 0 (0-0)                           |                                        | 0 (0-0)                    |                                 | 0 (0-0)                            |                                         | 0 (0-0)              |                           | 0 (0-0)                      | 0 (0-0)                           |
| 2013 | Poland           | 0 (0-0)                   |                                | 0 (0-0)                           |                                        | 0 (0-0)                    |                                 | 0 (0-0)                            |                                         | 0 (0-0)              |                           | 0 (0-0)                      | 0 (0-0)                           |
| 2014 | Poland           | 0 (0-0)                   |                                | 0 (0-0)                           |                                        | 0 (0-0)                    |                                 | 0 (0-0)                            |                                         | 0 (0-0)              |                           | 0 (0-0)                      | 0 (0-0)                           |
| 2015 | Poland           | 0 (0-0)                   | 0 (0-0)                        | 0 (0-0)                           | 0 (0-0)                                | 0 (0-0)                    | 0 (0-0)                         | 0 (0-0)                            | 0 (0-0)                                 | 0 (0-0)              | 0 (0-0)                   | 0 (0-0)                      | 0 (0-0)                           |
| 2000 | Portugal         | 0 (0-1)                   |                                | 0 (0-0)                           |                                        | 1 (0-1)                    |                                 | 0 (0-0)                            |                                         | 0 (0-0)              |                           | 0 (0-0)                      | 0 (0-0)                           |
| 2001 | Portugal         | 0 (0-1)                   |                                | 0 (0-0)                           |                                        | 0 (0-0)                    |                                 | 0 (0-0)                            |                                         | 0 (0-0)              |                           | 0 (0-0)                      | 0 (0-0)                           |
| 2002 | Portugal         | 0 (0-1)                   |                                | 0 (0-0)                           |                                        | 1 (0-1)                    |                                 | 0 (0-0)                            |                                         | 0 (0-0)              |                           | 0 (0-0)                      | 0 (0-0)                           |
| 2003 | Portugal         | 0 (0-0)                   |                                | 0 (0-0)                           |                                        | 0 (0-0)                    |                                 | 0 (0-0)                            |                                         | 0 (0-0)              |                           | 0 (0-0)                      | 0 (0-0)                           |
| 2004 | Portugal         | 0 (0-0)                   |                                | 0 (0-0)                           |                                        | 0 (0-0)                    |                                 | 0 (0-0)                            |                                         | 0 (0-0)              |                           | 0 (0-0)                      | 0 (0-0)                           |
| 2005 | Portugal         | 0 (0-0)                   |                                | 0 (0-0)                           |                                        | 0 (0-0)                    |                                 | 0 (0-0)                            |                                         | 0 (0-0)              |                           | 0 (0-0)                      | 0 (0-0)                           |
| 2006 | Portugal         | 0 (0-0)                   |                                | 0 (0-0)                           |                                        | 0 (0-0)                    |                                 | 0 (0-0)                            |                                         | 0 (0-0)              |                           | 0 (0-0)                      | 0 (0-0)                           |
| 2007 | Portugal         | 0 (0-0)                   |                                | 0 (0-0)                           |                                        | 0 (0-0)                    |                                 | 0 (0-0)                            |                                         | 0 (0-0)              |                           | 0 (0-0)                      | 0 (0-0)                           |
| 2008 | Portugal         | 0 (0-0)                   |                                | 0 (0-0)                           |                                        | 0 (0-0)                    |                                 | 0 (0-0)                            |                                         | 0 (0-0)              |                           | 0 (0-0)                      | 0 (0-0)                           |
| 2009 | Portugal         | 0 (0-0)                   |                                | 0 (0-0)                           |                                        | 0 (0-0)                    |                                 | 0 (0-0)                            |                                         | 0 (0-0)              |                           | 0 (0-0)                      | 0 (0-0)                           |
| 2010 | Portugal         | 0 (0-0)                   |                                | 0 (0-0)                           |                                        | 0 (0-0)                    |                                 | 0 (0-0)                            |                                         | 0 (0-0)              |                           | 0 (0-0)                      | 0 (0-0)                           |
| 2011 | Portugal         | 0 (0-0)                   |                                | 0 (0-0)                           |                                        | 0 (0-0)                    |                                 | 0 (0-0)                            |                                         | 0 (0-0)              |                           | 0 (0-0)                      | 0 (0-0)                           |
| 2012 | Portugal         | 0 (0-0)                   |                                | 0 (0-0)                           |                                        | 0 (0-0)                    |                                 | 0 (0-0)                            |                                         | 0 (0-0)              |                           | 0 (0-0)                      | 0 (0-0)                           |
| 2013 | Portugal         | 0 (0-0)                   |                                | 0 (0-0)                           |                                        | 0 (0-0)                    |                                 | 0 (0-0)                            |                                         | 0 (0-0)              |                           | 0 (0-0)                      | 0 (0-0)                           |
| 2014 | Portugal         | 0 (0-0)                   |                                | 0 (0-0)                           |                                        | 0 (0-0)                    |                                 | 0 (0-0)                            |                                         | 0 (0-0)              |                           | 0 (0-0)                      | 0 (0-0)                           |
| 2015 | Portugal         | 0 (0-0)                   | 0 (0-0)                        | 0 (0-0)                           | 0 (0-0)                                | 0 (0-0)                    | 0 (0-0)                         | 0 (0-0)                            | 0 (0-0)                                 | 0 (0-0)              | 0 (0-0)                   | 0 (0-0)                      | 0 (0-0)                           |
| 2000 | Qatar            | 0 (0-0)                   |                                | 0 (0-0)                           |                                        | 0 (0-0)                    |                                 | 0 (0-0)                            |                                         | 0 (0-0)              |                           | 0 (0-0)                      | 0 (0-0)                           |
| 2001 | Qatar            | 0 (0-0)                   |                                | 0 (0-0)                           |                                        | 0 (0-0)                    |                                 | 0 (0-0)                            |                                         | 0 (0-0)              |                           | 0 (0-0)                      | 0 (0-0)                           |
| 2002 | Qatar            | 0 (0-0)                   |                                | 0 (0-0)                           |                                        | 0 (0-0)                    |                                 | 0 (0-0)                            |                                         | 0 (0-0)              |                           | 0 (0-0)                      | 0 (0-0)                           |
| 2003 | Qatar            | 0 (0-0)                   |                                | 0 (0-0)                           |                                        | 0 (0-0)                    |                                 | 0 (0-0)                            |                                         | 0 (0-0)              |                           | 0 (0-0)                      | 0 (0-0)                           |
| 2004 | Qatar            | 0 (0-0)                   |                                | 0 (0-0)                           |                                        | 0 (0-0)                    |                                 | 0 (0-0)                            |                                         | 0 (0-0)              |                           | 0 (0-0)                      | 0 (0-0)                           |
| 2005 | Qatar            | 0 (0-0)                   |                                | 0 (0-0)                           |                                        | 0 (0-0)                    |                                 | 0 (0-0)                            |                                         | 0 (0-0)              |                           | 0 (0-0)                      | 0 (0-0)                           |
| 2006 | Qatar            | 0 (0-0)                   |                                | 0 (0-0)                           |                                        | 0 (0-0)                    |                                 | 0 (0-0)                            |                                         | 0 (0-0)              |                           | 0 (0-0)                      | 0 (0-0)                           |

| Year | Country             | Hib pneumonia deaths (UR) | Hib pneumonia deaths, HIV (UR) | Hib pneumonia mortality rate (UR) | Hib pneumonia mortality rate, HIV (UR) | Hib meningitis deaths (UR) | Hib meningitis deaths, HIV (UR) | Hib meningitis mortality rate (UR) | Hib meningitis mortality rate, HIV (UR) | Hib NPNM deaths (UR) | Hib NPNM deaths, HIV (UR) | Hib NPNM mortality rate (UR) | Hib NPNM mortality rate, HIV (UR) |
|------|---------------------|---------------------------|--------------------------------|-----------------------------------|----------------------------------------|----------------------------|---------------------------------|------------------------------------|-----------------------------------------|----------------------|---------------------------|------------------------------|-----------------------------------|
| 2007 | Qatar               | 0 (0-0)                   |                                | 0 (0-0)                           | 0 (0-0)                                | 0 (0-0)                    |                                 | 0 (0-0)                            | 0 (0-0)                                 | 0 (0-0)              |                           | 0 (0-0)                      | 0 (0-0)                           |
| 2008 | Qatar               | 0 (0-0)                   |                                | 0 (0-0)                           | 0 (0-0)                                | 0 (0-0)                    |                                 | 0 (0-0)                            | 0 (0-0)                                 | 0 (0-0)              |                           | 0 (0-0)                      | 0 (0-0)                           |
| 2009 | Qatar               | 0 (0-0)                   |                                | 0 (0-0)                           | 0 (0-0)                                | 0 (0-0)                    |                                 | 0 (0-0)                            | 0 (0-0)                                 | 0 (0-0)              |                           | 0 (0-0)                      | 0 (0-0)                           |
| 2010 | Qatar               | 0 (0-0)                   |                                | 0 (0-0)                           | 0 (0-0)                                | 0 (0-0)                    |                                 | 0 (0-0)                            | 0 (0-0)                                 | 0 (0-0)              |                           | 0 (0-0)                      | 0 (0-0)                           |
| 2011 | Qatar               | 0 (0-0)                   |                                | 0 (0-0)                           | 0 (0-0)                                | 0 (0-0)                    |                                 | 0 (0-0)                            | 0 (0-0)                                 | 0 (0-0)              |                           | 0 (0-0)                      | 0 (0-0)                           |
| 2012 | Qatar               | 0 (0-0)                   |                                | 0 (0-0)                           | 0 (0-0)                                | 0 (0-0)                    |                                 | 0 (0-0)                            | 0 (0-0)                                 | 0 (0-0)              |                           | 0 (0-0)                      | 0 (0-0)                           |
| 2013 | Qatar               | 0 (0-0)                   |                                | 0 (0-0)                           | 0 (0-0)                                | 0 (0-0)                    |                                 | 0 (0-0)                            | 0 (0-0)                                 | 0 (0-0)              |                           | 0 (0-0)                      | 0 (0-0)                           |
| 2014 | Qatar               | 0 (0-0)                   |                                | 0 (0-0)                           | 0 (0-0)                                | 0 (0-0)                    |                                 | 0 (0-0)                            | 0 (0-0)                                 | 0 (0-0)              |                           | 0 (0-0)                      | 0 (0-0)                           |
| 2015 | Qatar               | 0 (0-0)                   | 0 (0-0)                        | 0 (0-0)                           | 0 (0-0)                                | 0 (0-0)                    | 0 (0-0)                         | 0 (0-0)                            | 0 (0-0)                                 | 0 (0-0)              | 0 (0-0)                   | 0 (0-0)                      | 0 (0-0)                           |
| 2000 | Republic of Korea   | 30 (21-39)                |                                | 1 (1-1)                           | 1 (1-1)                                | 12 (6-20)                  |                                 | 0 (0-1)                            | 0 (0-1)                                 | 0 (0-0)              |                           | 0 (0-0)                      | 0 (0-0)                           |
| 2001 | Republic of Korea   | 26 (18-34)                |                                | 1 (1-1)                           | 1 (1-1)                                | 10 (5-17)                  |                                 | 0 (0-1)                            | 0 (0-1)                                 | 0 (0-0)              |                           | 0 (0-0)                      | 0 (0-0)                           |
| 2002 | Republic of Korea   | 24 (17-31)                |                                | 1 (1-1)                           | 1 (1-1)                                | 10 (5-17)                  |                                 | 0 (0-1)                            | 0 (0-1)                                 | 0 (0-0)              |                           | 0 (0-0)                      | 0 (0-0)                           |
| 2003 | Republic of Korea   | 19 (13-25)                |                                | 1 (0-1)                           | 1 (0-1)                                | 8 (4-13)                   |                                 | 0 (0-0)                            | 0 (0-0)                                 | 0 (0-0)              |                           | 0 (0-0)                      | 0 (0-0)                           |
| 2004 | Republic of Korea   | 14 (10-18)                |                                | 1 (0-1)                           | 1 (0-1)                                | 9 (4-14)                   |                                 | 0 (0-1)                            | 0 (0-1)                                 | 0 (0-0)              |                           | 0 (0-0)                      | 0 (0-0)                           |
| 2005 | Republic of Korea   | 13 (9-16)                 |                                | 0 (0-1)                           | 0 (0-1)                                | 6 (3-11)                   |                                 | 0 (0-0)                            | 0 (0-0)                                 | 0 (0-0)              |                           | 0 (0-0)                      | 0 (0-0)                           |
| 2006 | Republic of Korea   | 15 (10-19)                |                                | 1 (0-1)                           | 1 (0-1)                                | 9 (4-14)                   |                                 | 0 (0-1)                            | 0 (0-1)                                 | 0 (0-0)              |                           | 0 (0-0)                      | 0 (0-0)                           |
| 2007 | Republic of Korea   | 11 (8-15)                 |                                | 0 (0-1)                           | 0 (0-1)                                | 10 (5-17)                  |                                 | 0 (0-1)                            | 0 (0-1)                                 | 0 (0-0)              |                           | 0 (0-0)                      | 0 (0-0)                           |
| 2008 | Republic of Korea   | 11 (8-15)                 |                                | 0 (0-1)                           | 0 (0-1)                                | 7 (3-11)                   |                                 | 0 (0-0)                            | 0 (0-0)                                 | 0 (0-0)              |                           | 0 (0-0)                      | 0 (0-0)                           |
| 2009 | Republic of Korea   | 11 (8-15)                 |                                | 0 (0-1)                           | 0 (0-1)                                | 7 (4-12)                   |                                 | 0 (0-1)                            | 0 (0-1)                                 | 0 (0-0)              |                           | 0 (0-0)                      | 0 (0-0)                           |
| 2010 | Republic of Korea   | 11 (7-14)                 |                                | 0 (0-1)                           | 0 (0-1)                                | 7 (4-12)                   |                                 | 0 (0-1)                            | 0 (0-1)                                 | 0 (0-0)              |                           | 0 (0-0)                      | 0 (0-0)                           |
| 2011 | Republic of Korea   | 10 (7-14)                 |                                | 0 (0-1)                           | 0 (0-1)                                | 9 (5-15)                   |                                 | 0 (0-1)                            | 0 (0-1)                                 | 0 (0-0)              |                           | 0 (0-0)                      | 0 (0-0)                           |
| 2012 | Republic of Korea   | 7 (5-9)                   |                                | 0 (0-0)                           | 0 (0-0)                                | 7 (3-11)                   |                                 | 0 (0-0)                            | 0 (0-0)                                 | 0 (0-0)              |                           | 0 (0-0)                      | 0 (0-0)                           |
| 2013 | Republic of Korea   | 8 (6-10)                  |                                | 0 (0-0)                           | 0 (0-0)                                | 6 (3-11)                   |                                 | 0 (0-0)                            | 0 (0-0)                                 | 0 (0-0)              |                           | 0 (0-0)                      | 0 (0-0)                           |
| 2014 | Republic of Korea   | 1 (1-2)                   |                                | 0 (0-0)                           | 0 (0-0)                                | 1 (1-2)                    |                                 | 0 (0-0)                            | 0 (0-0)                                 | 0 (0-0)              |                           | 0 (0-0)                      | 0 (0-0)                           |
| 2015 | Republic of Korea   | 1 (0-1)                   | 0 (0-0)                        | 0 (0-0)                           | 0 (0-0)                                | 0 (0-0)                    | 0 (0-0)                         | 0 (0-0)                            | 0 (0-0)                                 | 0 (0-0)              | 0 (0-0)                   | 0 (0-0)                      | 0 (0-0)                           |
| 2000 | Republic of Moldova | 28 (19-36)                |                                | 12 (8-15)                         | 12 (8-15)                              | 6 (2-12)                   |                                 | 3 (1-5)                            | 3 (1-5)                                 | 0 (0-0)              |                           | 0 (0-0)                      | 0 (0-0)                           |
| 2001 | Republic of Moldova | 23 (16-30)                |                                | 10 (7-13)                         | 10 (7-13)                              | 2 (0-5)                    |                                 | 1 (0-2)                            | 1 (0-2)                                 | 0 (0-0)              |                           | 0 (0-0)                      | 0 (0-0)                           |
| 2002 | Republic of Moldova | 17 (12-22)                |                                | 8 (5-10)                          | 8 (5-10)                               | 3 (0-7)                    |                                 | 2 (0-3)                            | 2 (0-3)                                 | 0 (0-0)              |                           | 0 (0-0)                      | 0 (0-0)                           |
| 2003 | Republic of Moldova | 15 (11-20)                |                                | 7 (5-10)                          | 7 (5-10)                               | 3 (0-6)                    |                                 | 1 (0-3)                            | 1 (0-3)                                 | 0 (0-0)              |                           | 0 (0-0)                      | 0 (0-0)                           |
| 2004 | Republic of Moldova | 11 (8-15)                 |                                | 6 (4-7)                           | 6 (4-7)                                | 3 (0-6)                    |                                 | 1 (0-3)                            | 1 (0-3)                                 | 0 (0-0)              |                           | 0 (0-0)                      | 0 (0-0)                           |
| 2005 | Republic of Moldova | 11 (7-14)                 |                                | 5 (4-7)                           | 5 (4-7)                                | 4 (0-9)                    |                                 | 2 (0-4)                            | 2 (0-4)                                 | 0 (0-0)              |                           | 0 (0-0)                      | 0 (0-0)                           |
| 2006 | Republic of Moldova | 11 (8-15)                 |                                | 6 (4-7)                           | 6 (4-7)                                | 1 (0-2)                    |                                 | 0 (0-1)                            | 0 (0-1)                                 | 0 (0-0)              |                           | 0 (0-0)                      | 0 (0-0)                           |
| 2007 | Republic of Moldova | 8 (6-11)                  |                                | 4 (3-5)                           | 4 (3-5)                                | 2 (0-4)                    |                                 | 1 (0-2)                            | 1 (0-2)                                 | 0 (0-0)              |                           | 0 (0-0)                      | 0 (0-0)                           |
| 2008 | Republic of Moldova | 9 (6-11)                  |                                | 4 (3-5)                           | 4 (3-5)                                | 2 (0-5)                    |                                 | 1 (0-2)                            | 1 (0-2)                                 | 0 (0-0)              |                           | 0 (0-0)                      | 0 (0-0)                           |
| 2009 | Republic of Moldova | 5 (4-7)                   |                                | 2 (2-3)                           | 2 (2-3)                                | 2 (0-4)                    |                                 | 1 (0-2)                            | 1 (0-2)                                 | 0 (0-0)              |                           | 0 (0-0)                      | 0 (0-0)                           |
| 2010 | Republic of Moldova | 1 (1-2)                   |                                | 1 (0-1)                           | 1 (0-1)                                | 0 (0-1)                    |                                 | 0 (0-0)                            | 0 (0-0)                                 | 0 (0-0)              |                           | 0 (0-0)                      | 0 (0-0)                           |
| 2011 | Republic of Moldova | 1 (1-1)                   |                                | 0 (0-1)                           | 0 (0-1)                                | 1 (0-1)                    |                                 | 0 (0-0)                            | 0 (0-0)                                 | 0 (0-0)              |                           | 0 (0-0)                      | 0 (0-0)                           |
| 2012 | Republic of Moldova | 1 (0-1)                   |                                | 0 (0-0)                           | 0 (0-0)                                | 0 (0-0)                    |                                 | 0 (0-0)                            | 0 (0-0)                                 | 0 (0-0)              |                           | 0 (0-0)                      | 0 (0-0)                           |
| 2013 | Republic of Moldova | 1 (0-1)                   |                                | 0 (0-0)                           | 0 (0-0)                                | 0 (0-0)                    |                                 | 0 (0-0)                            | 0 (0-0)                                 | 0 (0-0)              |                           | 0 (0-0)                      | 0 (0-0)                           |
| 2014 | Republic of Moldova | 0 (0-0)                   |                                | 0 (0-0)                           | 0 (0-0)                                | 0 (0-0)                    |                                 | 0 (0-0)                            | 0 (0-0)                                 | 0 (0-0)              |                           | 0 (0-0)                      | 0 (0-0)                           |
| 2015 | Republic of Moldova | 0 (0-0)                   | 0 (0-0)                        | 0 (0-0)                           | 0 (0-0)                                | 0 (0-0)                    | 0 (0-0)                         | 0 (0-0)                            | 0 (0-0)                                 | 0 (0-0)              | 0 (0-0)                   | 0 (0-0)                      | 0 (0-0)                           |
| 2000 | Romania             | 322 (226-423)             |                                | 29 (21-38)                        | 29 (21-38)                             | 35 (15-64)                 |                                 | 3 (1-6)                            | 3 (1-6)                                 | 0 (0-1)              |                           | 0 (0-0)                      | 0 (0-0)                           |
| 2001 | Romania             | 298 (210-391)             |                                | 26 (18-34)                        | 26 (18-34)                             | 34 (15-63)                 |                                 | 3 (1-6)                            | 3 (1-6)                                 | 0 (0-1)              |                           | 0 (0-0)                      | 0 (0-0)                           |
| 2002 | Romania             | 262 (185-345)             |                                | 23 (16-30)                        | 23 (16-30)                             | 35 (16-65)                 |                                 | 3 (1-6)                            | 3 (1-6)                                 | 0 (0-1)              |                           | 0 (0-0)                      | 0 (0-0)                           |
| 2003 | Romania             | 209 (147-275)             |                                | 19 (13-25)                        | 19 (13-25)                             | 22 (10-41)                 |                                 | 2 (1-4)                            | 2 (1-4)                                 | 0 (0-0)              |                           | 0 (0-0)                      | 0 (0-0)                           |
| 2004 | Romania             | 203 (143-267)             |                                | 19 (13-25)                        | 19 (13-25)                             | 16 (7-30)                  |                                 | 2 (1-3)                            | 2 (1-3)                                 | 0 (0-0)              |                           | 0 (0-0)                      | 0 (0-0)                           |
| 2005 | Romania             | 167 (118-220)             |                                | 16 (11-21)                        | 16 (11-21)                             | 14 (6-27)                  |                                 | 1 (1-3)                            | 1 (1-3)                                 | 0 (0-0)              |                           | 0 (0-0)                      | 0 (0-0)                           |
| 2006 | Romania             | 147 (103-193)             |                                | 14 (10-19)                        | 14 (10-19)                             | 13 (6-24)                  |                                 | 1 (1-2)                            | 1 (1-2)                                 | 0 (0-0)              |                           | 0 (0-0)                      | 0 (0-0)                           |
| 2007 | Romania             | 138 (97-181)              |                                | 13 (9-18)                         | 13 (9-18)                              | 12 (5-23)                  |                                 | 1 (1-2)                            | 1 (1-2)                                 | 0 (0-0)              |                           | 0 (0-0)                      | 0 (0-0)                           |
| 2008 | Romania             | 135 (95-177)              |                                | 13 (9-17)                         | 13 (9-17)                              | 8 (4-15)                   |                                 | 1 (0-1)                            | 1 (0-1)                                 | 0 (0-0)              |                           | 0 (0-0)                      | 0 (0-0)                           |
| 2009 | Romania             | 120 (84-157)              |                                | 11 (8-15)                         | 11 (8-15)                              | 7 (3-14)                   |                                 | 1 (0-1)                            | 1 (0-1)                                 | 0 (0-0)              |                           | 0 (0-0)                      | 0 (0-0)                           |
| 2010 | Romania             | 117 (83-154)              |                                | 11 (8-15)                         | 11 (8-15)                              | 9 (4-16)                   |                                 | 1 (0-2)                            | 1 (0-2)                                 | 0 (0-0)              |                           | 0 (0-0)                      | 0 (0-0)                           |
| 2011 | Romania             | 20 (14-26)                |                                | 2 (1-3)                           | 2 (1-3)                                | 2 (1-3)                    |                                 | 0 (0-0)                            | 0 (0-0)                                 | 0 (0-0)              |                           | 0 (0-0)                      | 0 (0-0)                           |
| 2012 | Romania             | 8 (6-11)                  |                                | 1 (1-1)                           | 1 (1-1)                                | 0 (0-1)                    |                                 | 0 (0-0)                            | 0 (0-0)                                 | 0 (0-0)              |                           | 0 (0-0)                      | 0 (0-0)                           |
| 2013 | Romania             | 8 (6-11)                  |                                | 1 (1-1)                           | 1 (1-1)                                | 1 (0-1)                    |                                 | 0 (0-0)                            | 0 (0-0)                                 | 0 (0-0)              |                           | 0 (0-0)                      | 0 (0-0)                           |
| 2014 | Romania             | 7 (5-10)                  |                                | 1 (1-1)                           | 1 (1-1)                                | 1 (0-1)                    |                                 | 0 (0-0)                            | 0 (0-0)                                 | 0 (0-0)              |                           | 0 (0-0)                      | 0 (0-0)                           |
| 2015 | Romania             | 7 (5-9)                   | 0 (0-0)                        | 1 (1-1)                           | 1 (1-1)                                | 0 (0-1)                    | 0 (0-0)                         | 0 (0-0)                            | 0 (0-0)                                 | 0 (0-0)              | 0 (0-0)                   | 0 (0-0)                      | 0 (0-0)                           |
| 2000 | Russian Federation  | 607 (427-797)             |                                | 10 (7-13)                         | 10 (7-13)                              | 154 (66-286)               |                                 | 2 (1-5)                            | 2 (1-5)                                 | 0 (0-0)              |                           | 0 (0-0)                      | 0 (0-0)                           |
| 2001 | Russian Federation  | 580 (408-763)             |                                | 9 (6-12)                          | 9 (6-12)                               | 147 (65-272)               |                                 | 2 (1-4)                            | 2 (1-4)                                 | 1 (1-2)              |                           | 0 (0-0)                      | 0 (0-0)                           |
| 2002 | Russian Federation  | 531 (374-698)             |                                | 8 (6-10)                          | 8 (6-10)                               | 135 (60-249)               |                                 | 2 (1-4)                            | 2 (1-4)                                 | 1 (0-2)              |                           | 0 (0-0)                      | 0 (0-0)                           |
| 2003 | Russian Federation  | 469 (330-616)             |                                | 7 (5-9)                           | 7 (5-9)                                | 120 (53-221)               |                                 | 2 (1-3)                            | 2 (1-3)                                 | 1 (0-2)              |                           | 0 (0-0)                      | 0 (0-0)                           |
| 2004 | Russian Federation  | 421 (296-553)             |                                | 6 (4-8)                           | 6 (4-8)                                | 108 (48-200)               |                                 | 2 (1-3)                            | 2 (1-3)                                 | 1 (0-2)              |                           | 0 (0-0)                      | 0 (0-0)                           |
| 2005 | Russian Federation  | 378 (266-497)             |                                | 6 (4-7)                           | 6 (4-7)                                | 98 (43-181)                |                                 | 1 (1-3)                            | 1 (1-3)                                 | 1 (0-1)              |                           | 0 (0-0)                      | 0 (0-0)                           |
| 2006 | Russian Federation  | 336 (236-441)             |                                | 5 (3-6)                           | 5 (3-6)                                | 87 (39-162)                |                                 | 1 (1-2)                            | 1 (1-2)                                 | 1 (0-1)              |                           | 0 (0-0)                      | 0 (0-0)                           |
| 2007 | Russian Federation  | 299 (210-393)             |                                | 4 (3-5)                           | 4 (3-5)                                | 78 (35-145)                |                                 | 1 (0-2)                            | 1 (0-2)                                 | 1 (0-1)              |                           | 0 (0-0)                      | 0 (0-0)                           |
| 2008 | Russian Federation  | 270 (190-354)             |                                | 4 (3-5)                           | 4 (3-5)                                | 70 (31-130)                |                                 | 1 (0-2)                            | 1 (0-2)                                 | 1 (0-1)              |                           | 0 (0-0)                      | 0 (0-0)                           |
| 2009 | Russian Federation  | 253 (178-332)             |                                | 3 (2-4)                           | 3 (2-4)                                | 66 (29-121)                |                                 | 1 (0-2)                            | 1 (0-2)                                 | 1 (0-1)              |                           | 0 (0-0)                      | 0 (0-0)                           |
| 2010 | Russian Federation  | 239 (168-314)             |                                | 3 (2-4)                           | 3 (2-4)                                | 62 (27-114)                |                                 | 1 (0-1)                            | 1 (0-1)                                 | 1 (0-1)              |                           | 0 (0-0)                      | 0 (0-0)                           |
| 2011 | Russian Federation  | 228 (159-297)             |                                | 3 (2-4)                           | 3 (2-4)                                | 57 (25-106)                |                                 | 1 (0-1)                            | 1 (0-1)                                 | 1 (0-1)              |                           | 0 (0-0)                      | 0 (0-0)                           |
| 2012 | Russian Federation  | 209 (147-275)             |                                | 3 (2-3)                           | 3 (2-3)                                | 64 (28-118)                |                                 | 1 (0-1)                            | 1 (0-1)                                 | 1 (0-1)              |                           | 0 (0-0)                      | 0 (0-0)                           |
| 2013 | Russian Federation  | 210 (148-276)             |                                | 2 (2-3)                           | 2 (2-3)                                | 63 (28-117)                |                                 | 1 (0-1)                            | 1 (0-1)                                 | 1 (0-1)              |                           | 0 (0-0)                      | 0 (0-0)                           |
| 2014 | Russian Federation  | 204 (143-268)             |                                | 2 (2-3)                           | 2 (2-3)                                | 61 (27-112)                |                                 | 1 (0-1)                            | 1 (0-1)                                 | 1 (0-1)              |                           | 0 (0-0)                      | 0 (0-0)                           |
| 2015 | Russian Federation  | 198 (139-260)             | 0 (0-0)                        | 2 (2-3)                           | 2 (2-3)                                | 58 (26-107)                | 0 (0-0)                         | 1 (0-1)                            | 1 (0-1)                                 | 0 (0-0)              | 0 (0-0)                   | 0 (0-0)                      | 0 (0-0)                           |
| 2000 | Rwanda              | 1851 (1302-2432)          |                                | 141 (99-185)                      | 141 (99-185)                           | 919 (395-1392)             |                                 | 70 (30-106)                        | 70 (30-106)                             | 4 (2-6)              |                           | 0 (0-0)                      | 0 (0-0)                           |
| 2001 | Rwanda              | 1894 (1332-2489)          |                                | 133 (94-175)                      | 133 (94-175)                           | 931 (404-1408)             |                                 | 65 (28-99)                         | 65 (28-99)                              | 4 (2-6)              |                           | 0 (0-0)                      | 0 (0-0)                           |
| 2002 | Rwanda              | 266 (187-350)             |                                | 18 (13-24)                        | 18 (13-24)                             | 129 (57-195)               |                                 | 9 (4-13)                           | 9 (4-13)                                | 1 (0-1)              |                           | 0 (0-0)                      | 0 (0-0)                           |
| 2003 | Rwanda              | 105 (75-139)              |                                | 7 (5-9)                           | 7 (5-9)                                | 51 (15-85)                 |                                 | 3 (1-6)                            | 3 (1-6)                                 | 0 (0-0)              |                           | 0 (0-0)                      | 0 (0-0)                           |
| 2004 | Rwanda              | 106 (74-139)              |                                | 7 (5-10)                          | 7 (5-10)                               | 51 (15-84)                 |                                 | 3 (1-6)                            | 3 (1-6)                                 | 0 (0-0)              |                           | 0 (0-0)                      | 0 (0-0)                           |
| 2005 | Rwanda              | 81 (57-106)               |                                | 6 (4-7)                           | 6 (4-7)                                | 38 (11-63)                 |                                 | 3 (1-4)                            | 3 (1-4)                                 | 0 (0-0)              |                           | 0 (0-0)                      | 0 (0-0)                           |
| 2006 | Rwanda              | 58 (41-76)                |                                | 4 (3-5)                           | 4 (3-5)                                | 27 (8-45)                  |                                 | 2 (1-3)                            | 2 (1-3)                                 | 0 (0-0)              |                           | 0 (0-0)                      | 0 (0-0)                           |
| 2007 | Rwanda              | 9 (6-11)                  |                                | 1 (0-1)                           | 1 (0-1)                                | 4 (1-7)                    |                                 | 0 (0-0)                            | 0 (0-0)                                 | 0 (0-0)              |                           | 0 (0-0)                      | 0 (0-0)                           |
| 2008 | Rwanda              | 8 (6-10)                  |                                | 1 (0-1)                           | 1 (0-1)                                | 4 (1-6)                    |                                 | 0 (0-0)                            | 0 (0-0)                                 | 0 (0-0)              |                           | 0 (0-0)                      | 0 (0-0)                           |
| 2009 | Rwanda              | 7 (5-9)                   |                                | 0 (0-1)                           | 0 (0-1)                                | 3 (1-5)                    |                                 | 0 (0-0)                            | 0 (0-0)                                 | 0 (0-0)              |                           | 0 (0-0)                      | 0 (0-0)                           |
| 2010 | Rwanda              | 6 (5-9)                   |                                | 0 (0-1)                           | 0 (0-1)                                | 3 (1-5)                    |                                 | 0 (0-0)                            | 0 (0-0)                                 | 0 (0-0)              |                           | 0 (0-0)                      | 0 (0-0)                           |
| 2011 | Rwanda              | 6 (4-8)                   |                                | 0 (0-0)                           | 0 (0-0)                                | 3 (1-4)                    |                                 | 0 (0-0)                            | 0 (0-0)                                 | 0 (0-0)              |                           | 0 (0-0)                      | 0 (0-0)                           |
| 2012 | Rwanda              | 5 (4-7)                   |                                | 0 (0-0)                           | 0 (0-0)                                | 2 (1-4)                    |                                 | 0 (0-0)                            | 0 (0-0)                                 | 0 (0-0)              |                           | 0 (0-0)                      | 0 (0-0)                           |
| 2013 | Rwanda              | 5 (3-6)                   |                                | 0 (0-0)                           | 0 (0-0)                                | 2 (1-3)                    |                                 | 0 (0-0)                            | 0 (0-0)                                 | 0 (0-0)              |                           | 0 (0-0)                      | 0 (0-0)                           |
| 2014 | Rwanda              | 4 (3-5)                   |                                | 0 (0-0)                           | 0 (0-0)                                | 2 (1-3)                    |                                 | 0 (0-0)                            | 0 (0-0)                                 | 0 (0-0)              |                           | 0 (0-0)                      | 0 (0-0)                           |

Hib = *Haemophilus influenzae* type b; npnm = non-pneumonia, non-meningitis; HIV = deaths only in HIV-infected children; Uncertainty range provided in parentheses.



| Year | Country               | Hib pneumonia deaths (UR) | Hib pneumonia deaths, HIV (UR) | Hib pneumonia mortality rate (UR) | Hib pneumonia mortality rate, HIV (UR) | Hib meningitis deaths (UR) | Hib meningitis deaths, HIV (UR) | Hib meningitis mortality rate (UR) | Hib meningitis mortality rate, HIV (UR) | Hib NPNM deaths (UR) | Hib NPNM deaths, HIV (UR) | Hib NPNM mortality rate (UR) | Hib NPNM mortality rate, HIV (UR) |
|------|-----------------------|---------------------------|--------------------------------|-----------------------------------|----------------------------------------|----------------------------|---------------------------------|------------------------------------|-----------------------------------------|----------------------|---------------------------|------------------------------|-----------------------------------|
| 2007 | Sao Tome and Principe | 11 (7-14)                 |                                | 40 (28-53)                        |                                        | 4 (1-6)                    |                                 | 14 (5-22)                          |                                         | 0 (0-0)              |                           | 0 (0-0)                      |                                   |
| 2008 | Sao Tome and Principe | 11 (7-14)                 |                                | 40 (28-52)                        |                                        | 4 (1-6)                    |                                 | 13 (5-21)                          |                                         | 0 (0-0)              |                           | 0 (0-0)                      |                                   |
| 2009 | Sao Tome and Principe | 10 (7-13)                 |                                | 37 (26-48)                        |                                        | 3 (1-5)                    |                                 | 12 (5-19)                          |                                         | 0 (0-0)              |                           | 0 (0-0)                      |                                   |
| 2010 | Sao Tome and Principe | 1 (1-2)                   |                                | 5 (4-7)                           |                                        | 0 (0-1)                    |                                 | 2 (1-3)                            |                                         | 0 (0-0)              |                           | 0 (0-0)                      |                                   |
| 2011 | Sao Tome and Principe | 1 (0-1)                   |                                | 2 (2-3)                           |                                        | 0 (0-0)                    |                                 | 1 (0-1)                            |                                         | 0 (0-0)              |                           | 0 (0-0)                      |                                   |
| 2012 | Sao Tome and Principe | 1 (0-1)                   |                                | 2 (2-3)                           |                                        | 0 (0-0)                    |                                 | 1 (0-1)                            |                                         | 0 (0-0)              |                           | 0 (0-0)                      |                                   |
| 2013 | Sao Tome and Principe | 1 (0-1)                   |                                | 2 (2-3)                           |                                        | 0 (0-0)                    |                                 | 1 (0-1)                            |                                         | 0 (0-0)              |                           | 0 (0-0)                      |                                   |
| 2014 | Sao Tome and Principe | 1 (0-1)                   |                                | 2 (2-3)                           |                                        | 0 (0-0)                    |                                 | 1 (0-1)                            |                                         | 0 (0-0)              |                           | 0 (0-0)                      |                                   |
| 2015 | Sao Tome and Principe | 0 (0-0)                   | 0 (0-0)                        | 0 (0-0)                           | 0 (0-0)                                | 0 (0-0)                    | 0 (0-0)                         | 0 (0-0)                            | 0 (0-0)                                 | 0 (0-0)              | 0 (0-0)                   | 0 (0-0)                      | 0 (0-0)                           |
| 2000 | Saudi Arabia          | 211 (148-277)             |                                | 8 (5-10)                          |                                        | 25 (13-42)                 |                                 | 1 (0-2)                            |                                         | 0 (0-0)              |                           | 0 (0-0)                      |                                   |
| 2001 | Saudi Arabia          | 194 (137-255)             |                                | 7 (5-9)                           |                                        | 23 (12-39)                 |                                 | 1 (0-1)                            |                                         | 0 (0-0)              |                           | 0 (0-0)                      |                                   |
| 2002 | Saudi Arabia          | 30 (21-40)                |                                | 1 (1-1)                           |                                        | 5 (3-9)                    |                                 | 0 (0-0)                            |                                         | 0 (0-0)              |                           | 0 (0-0)                      |                                   |
| 2003 | Saudi Arabia          | 14 (10-18)                |                                | 1 (0-1)                           |                                        | 2 (1-4)                    |                                 | 0 (0-0)                            |                                         | 0 (0-0)              |                           | 0 (0-0)                      |                                   |
| 2004 | Saudi Arabia          | 13 (9-17)                 |                                | 0 (0-1)                           |                                        | 2 (1-4)                    |                                 | 0 (0-0)                            |                                         | 0 (0-0)              |                           | 0 (0-0)                      |                                   |
| 2005 | Saudi Arabia          | 12 (8-16)                 |                                | 0 (0-1)                           |                                        | 2 (1-4)                    |                                 | 0 (0-0)                            |                                         | 0 (0-0)              |                           | 0 (0-0)                      |                                   |
| 2006 | Saudi Arabia          | 11 (8-15)                 |                                | 0 (0-1)                           |                                        | 2 (1-3)                    |                                 | 0 (0-0)                            |                                         | 0 (0-0)              |                           | 0 (0-0)                      |                                   |
| 2007 | Saudi Arabia          | 2 (1-2)                   |                                | 0 (0-0)                           |                                        | 0 (0-0)                    |                                 | 0 (0-0)                            |                                         | 0 (0-0)              |                           | 0 (0-0)                      |                                   |
| 2008 | Saudi Arabia          | 2 (1-2)                   |                                | 0 (0-0)                           |                                        | 0 (0-0)                    |                                 | 0 (0-0)                            |                                         | 0 (0-0)              |                           | 0 (0-0)                      |                                   |
| 2009 | Saudi Arabia          | 2 (1-2)                   |                                | 0 (0-0)                           |                                        | 0 (0-1)                    |                                 | 0 (0-0)                            |                                         | 0 (0-0)              |                           | 0 (0-0)                      |                                   |
| 2010 | Saudi Arabia          | 2 (1-2)                   |                                | 0 (0-0)                           |                                        | 0 (0-1)                    |                                 | 0 (0-0)                            |                                         | 0 (0-0)              |                           | 0 (0-0)                      |                                   |
| 2011 | Saudi Arabia          | 2 (1-2)                   |                                | 0 (0-0)                           |                                        | 0 (0-1)                    |                                 | 0 (0-0)                            |                                         | 0 (0-0)              |                           | 0 (0-0)                      |                                   |
| 2012 | Saudi Arabia          | 1 (1-2)                   |                                | 0 (0-0)                           |                                        | 0 (0-1)                    |                                 | 0 (0-0)                            |                                         | 0 (0-0)              |                           | 0 (0-0)                      |                                   |
| 2013 | Saudi Arabia          | 1 (1-2)                   |                                | 0 (0-0)                           |                                        | 0 (0-1)                    |                                 | 0 (0-0)                            |                                         | 0 (0-0)              |                           | 0 (0-0)                      |                                   |
| 2014 | Saudi Arabia          | 1 (1-2)                   |                                | 0 (0-0)                           |                                        | 0 (0-1)                    |                                 | 0 (0-0)                            |                                         | 0 (0-0)              |                           | 0 (0-0)                      |                                   |
| 2015 | Saudi Arabia          | 1 (1-2)                   | 0 (0-0)                        | 0 (0-0)                           | 0 (0-0)                                | 0 (0-0)                    | 0 (0-0)                         | 0 (0-0)                            | 0 (0-0)                                 | 0 (0-0)              | 0 (0-0)                   | 0 (0-0)                      | 0 (0-0)                           |
| 2000 | Senegal               | 1201 (845-1576)           |                                | 73 (51-95)                        |                                        | 453 (132-749)              |                                 | 27 (8-45)                          |                                         | 2 (1-3)              |                           | 0 (0-0)                      |                                   |
| 2001 | Senegal               | 1223 (860-1607)           |                                | 72 (51-95)                        |                                        | 459 (137-754)              |                                 | 27 (8-44)                          |                                         | 2 (1-3)              |                           | 0 (0-0)                      |                                   |
| 2002 | Senegal               | 1198 (843-1574)           |                                | 69 (48-91)                        |                                        | 447 (137-731)              |                                 | 26 (8-42)                          |                                         | 2 (1-3)              |                           | 0 (0-0)                      |                                   |
| 2003 | Senegal               | 1168 (821-1534)           |                                | 65 (46-86)                        |                                        | 434 (137-705)              |                                 | 24 (8-40)                          |                                         | 2 (1-3)              |                           | 0 (0-0)                      |                                   |
| 2004 | Senegal               | 1135 (798-1491)           |                                | 62 (44-82)                        |                                        | 420 (137-678)              |                                 | 23 (7-37)                          |                                         | 2 (1-3)              |                           | 0 (0-0)                      |                                   |
| 2005 | Senegal               | 1002 (705-1317)           |                                | 53 (38-70)                        |                                        | 370 (125-595)              |                                 | 20 (7-32)                          |                                         | 2 (1-2)              |                           | 0 (0-0)                      |                                   |
| 2006 | Senegal               | 88 (62-115)               |                                | 5 (3-6)                           |                                        | 32 (11-52)                 |                                 | 2 (1-3)                            |                                         | 0 (0-0)              |                           | 0 (0-0)                      |                                   |
| 2007 | Senegal               | 75 (53-99)                |                                | 4 (3-5)                           |                                        | 28 (9-44)                  |                                 | 1 (0-2)                            |                                         | 0 (0-0)              |                           | 0 (0-0)                      |                                   |
| 2008 | Senegal               | 83 (58-108)               |                                | 4 (3-5)                           |                                        | 30 (10-49)                 |                                 | 1 (1-2)                            |                                         | 0 (0-0)              |                           | 0 (0-0)                      |                                   |
| 2009 | Senegal               | 83 (58-109)               |                                | 4 (3-5)                           |                                        | 30 (9-50)                  |                                 | 1 (0-2)                            |                                         | 0 (0-0)              |                           | 0 (0-0)                      |                                   |
| 2010 | Senegal               | 9 (6-12)                  |                                | 0 (0-1)                           |                                        | 3 (1-6)                    |                                 | 0 (0-0)                            |                                         | 0 (0-0)              |                           | 0 (0-0)                      |                                   |
| 2011 | Senegal               | 9 (6-12)                  |                                | 0 (0-1)                           |                                        | 3 (1-5)                    |                                 | 0 (0-0)                            |                                         | 0 (0-0)              |                           | 0 (0-0)                      |                                   |
| 2012 | Senegal               | 9 (6-12)                  |                                | 0 (0-1)                           |                                        | 3 (1-5)                    |                                 | 0 (0-0)                            |                                         | 0 (0-0)              |                           | 0 (0-0)                      |                                   |
| 2013 | Senegal               | 9 (6-12)                  |                                | 0 (0-0)                           |                                        | 3 (1-5)                    |                                 | 0 (0-0)                            |                                         | 0 (0-0)              |                           | 0 (0-0)                      |                                   |
| 2014 | Senegal               | 9 (6-12)                  |                                | 0 (0-0)                           |                                        | 3 (1-5)                    |                                 | 0 (0-0)                            |                                         | 0 (0-0)              |                           | 0 (0-0)                      |                                   |
| 2015 | Senegal               | 9 (6-12)                  | 0 (0-0)                        | 0 (0-0)                           | 0 (0-0)                                | 3 (1-5)                    | 0 (0-0)                         | 0 (0-0)                            | 0 (0-0)                                 | 0 (0-0)              | 0 (0-0)                   | 0 (0-0)                      | 0 (0-0)                           |
| 2000 | Serbia                | 13 (9-17)                 |                                | 2 (1-3)                           |                                        | 6 (2-10)                   |                                 | 1 (0-2)                            |                                         | 0 (0-0)              |                           | 0 (0-0)                      |                                   |
| 2001 | Serbia                | 9 (6-12)                  |                                | 1 (1-2)                           |                                        | 5 (2-9)                    |                                 | 1 (0-1)                            |                                         | 0 (0-0)              |                           | 0 (0-0)                      |                                   |
| 2002 | Serbia                | 7 (5-9)                   |                                | 1 (1-2)                           |                                        | 3 (1-5)                    |                                 | 0 (0-1)                            |                                         | 0 (0-0)              |                           | 0 (0-0)                      |                                   |
| 2003 | Serbia                | 10 (7-14)                 |                                | 2 (1-2)                           |                                        | 4 (1-8)                    |                                 | 1 (0-1)                            |                                         | 0 (0-0)              |                           | 0 (0-0)                      |                                   |
| 2004 | Serbia                | 9 (7-12)                  |                                | 2 (1-2)                           |                                        | 3 (1-6)                    |                                 | 1 (0-1)                            |                                         | 0 (0-0)              |                           | 0 (0-0)                      |                                   |
| 2005 | Serbia                | 7 (5-10)                  |                                | 1 (1-2)                           |                                        | 5 (1-9)                    |                                 | 1 (0-2)                            |                                         | 0 (0-0)              |                           | 0 (0-0)                      |                                   |
| 2006 | Serbia                | 3 (2-4)                   |                                | 1 (0-1)                           |                                        | 2 (1-4)                    |                                 | 0 (0-1)                            |                                         | 0 (0-0)              |                           | 0 (0-0)                      |                                   |
| 2007 | Serbia                | 1 (0-1)                   |                                | 0 (0-0)                           |                                        | 0 (0-1)                    |                                 | 0 (0-0)                            |                                         | 0 (0-0)              |                           | 0 (0-0)                      |                                   |
| 2008 | Serbia                | 1 (0-1)                   |                                | 0 (0-0)                           |                                        | 0 (0-0)                    |                                 | 0 (0-0)                            |                                         | 0 (0-0)              |                           | 0 (0-0)                      |                                   |
| 2009 | Serbia                | 0 (0-0)                   |                                | 0 (0-0)                           |                                        | 0 (0-0)                    |                                 | 0 (0-0)                            |                                         | 0 (0-0)              |                           | 0 (0-0)                      |                                   |
| 2010 | Serbia                | 0 (0-0)                   |                                | 0 (0-0)                           |                                        | 0 (0-0)                    |                                 | 0 (0-0)                            |                                         | 0 (0-0)              |                           | 0 (0-0)                      |                                   |
| 2011 | Serbia                | 0 (0-0)                   |                                | 0 (0-0)                           |                                        | 0 (0-0)                    |                                 | 0 (0-0)                            |                                         | 0 (0-0)              |                           | 0 (0-0)                      |                                   |
| 2012 | Serbia                | 0 (0-0)                   |                                | 0 (0-0)                           |                                        | 0 (0-0)                    |                                 | 0 (0-0)                            |                                         | 0 (0-0)              |                           | 0 (0-0)                      |                                   |
| 2013 | Serbia                | 0 (0-0)                   |                                | 0 (0-0)                           |                                        | 0 (0-0)                    |                                 | 0 (0-0)                            |                                         | 0 (0-0)              |                           | 0 (0-0)                      |                                   |
| 2014 | Serbia                | 0 (0-0)                   |                                | 0 (0-0)                           |                                        | 0 (0-0)                    |                                 | 0 (0-0)                            |                                         | 0 (0-0)              |                           | 0 (0-0)                      |                                   |
| 2015 | Serbia                | 0 (0-0)                   | 0 (0-0)                        | 0 (0-0)                           | 0 (0-0)                                | 0 (0-0)                    | 0 (0-0)                         | 0 (0-0)                            | 0 (0-0)                                 | 0 (0-0)              | 0 (0-0)                   | 0 (0-0)                      | 0 (0-0)                           |
| 2000 | Seychelles            | 0 (0-0)                   |                                | 2 (2-3)                           |                                        | 0 (0-0)                    |                                 | 1 (0-1)                            |                                         | 0 (0-0)              |                           | 0 (0-0)                      |                                   |
| 2001 | Seychelles            | 0 (0-0)                   |                                | 3 (2-4)                           |                                        | 0 (0-0)                    |                                 | 1 (0-1)                            |                                         | 0 (0-0)              |                           | 0 (0-0)                      |                                   |
| 2002 | Seychelles            | 0 (0-0)                   |                                | 3 (2-4)                           |                                        | 0 (0-0)                    |                                 | 1 (0-1)                            |                                         | 0 (0-0)              |                           | 0 (0-0)                      |                                   |
| 2003 | Seychelles            | 0 (0-0)                   |                                | 3 (2-3)                           |                                        | 0 (0-0)                    |                                 | 1 (0-1)                            |                                         | 0 (0-0)              |                           | 0 (0-0)                      |                                   |
| 2004 | Seychelles            | 0 (0-0)                   |                                | 3 (2-3)                           |                                        | 0 (0-0)                    |                                 | 1 (0-1)                            |                                         | 0 (0-0)              |                           | 0 (0-0)                      |                                   |
| 2005 | Seychelles            | 0 (0-0)                   |                                | 3 (2-4)                           |                                        | 0 (0-0)                    |                                 | 1 (0-1)                            |                                         | 0 (0-0)              |                           | 0 (0-0)                      |                                   |
| 2006 | Seychelles            | 0 (0-0)                   |                                | 3 (2-4)                           |                                        | 0 (0-0)                    |                                 | 1 (0-1)                            |                                         | 0 (0-0)              |                           | 0 (0-0)                      |                                   |
| 2007 | Seychelles            | 0 (0-0)                   |                                | 3 (2-3)                           |                                        | 0 (0-0)                    |                                 | 1 (0-1)                            |                                         | 0 (0-0)              |                           | 0 (0-0)                      |                                   |
| 2008 | Seychelles            | 0 (0-0)                   |                                | 3 (2-3)                           |                                        | 0 (0-0)                    |                                 | 1 (0-1)                            |                                         | 0 (0-0)              |                           | 0 (0-0)                      |                                   |
| 2009 | Seychelles            | 0 (0-0)                   |                                | 3 (2-4)                           |                                        | 0 (0-0)                    |                                 | 1 (0-1)                            |                                         | 0 (0-0)              |                           | 0 (0-0)                      |                                   |
| 2010 | Seychelles            | 0 (0-0)                   |                                | 0 (0-1)                           |                                        | 0 (0-0)                    |                                 | 0 (0-0)                            |                                         | 0 (0-0)              |                           | 0 (0-0)                      |                                   |
| 2011 | Seychelles            | 0 (0-0)                   |                                | 0 (0-0)                           |                                        | 0 (0-0)                    |                                 | 0 (0-0)                            |                                         | 0 (0-0)              |                           | 0 (0-0)                      |                                   |
| 2012 | Seychelles            | 0 (0-0)                   |                                | 0 (0-0)                           |                                        | 0 (0-0)                    |                                 | 0 (0-0)                            |                                         | 0 (0-0)              |                           | 0 (0-0)                      |                                   |
| 2013 | Seychelles            | 0 (0-0)                   |                                | 0 (0-0)                           |                                        | 0 (0-0)                    |                                 | 0 (0-0)                            |                                         | 0 (0-0)              |                           | 0 (0-0)                      |                                   |
| 2014 | Seychelles            | 0 (0-0)                   |                                | 0 (0-0)                           |                                        | 0 (0-0)                    |                                 | 0 (0-0)                            |                                         | 0 (0-0)              |                           | 0 (0-0)                      |                                   |
| 2015 | Seychelles            | 0 (0-0)                   | 0 (0-0)                        | 0 (0-0)                           | 0 (0-0)                                | 0 (0-0)                    | 0 (0-0)                         | 0 (0-0)                            | 0 (0-0)                                 | 0 (0-0)              | 0 (0-0)                   | 0 (0-0)                      | 0 (0-0)                           |
| 2000 | Sierra Leone          | 844 (594-1109)            |                                | 121 (85-159)                      |                                        | 381 (191-555)              |                                 | 55 (27-80)                         |                                         | 2 (1-2)              |                           | 0 (0-0)                      |                                   |
| 2001 | Sierra Leone          | 860 (605-1129)            |                                | 118 (83-155)                      |                                        | 387 (193-564)              |                                 | 53 (27-78)                         |                                         | 2 (1-2)              |                           | 0 (0-0)                      |                                   |
| 2002 | Sierra Leone          | 886 (623-1165)            |                                | 116 (82-153)                      |                                        | 396 (197-577)              |                                 | 52 (26-76)                         |                                         | 2 (1-2)              |                           | 0 (0-0)                      |                                   |
| 2003 | Sierra Leone          | 920 (647-1209)            |                                | 115 (81-152)                      |                                        | 408 (203-595)              |                                 | 51 (25-75)                         |                                         | 2 (1-2)              |                           | 0 (0-0)                      |                                   |
| 2004 | Sierra Leone          | 957 (673-1257)            |                                | 115 (81-151)                      |                                        | 421 (209-614)              |                                 | 51 (25-74)                         |                                         | 2 (1-3)              |                           | 0 (0-0)                      |                                   |
| 2005 | Sierra Leone          | 980 (689-1288)            |                                | 114 (80-150)                      |                                        | 425 (210-620)              |                                 | 49 (24-72)                         |                                         | 2 (1-3)              |                           | 0 (0-0)                      |                                   |
| 2006 | Sierra Leone          | 997 (701-1310)            |                                | 112 (79-147)                      |                                        | 426 (210-623)              |                                 | 48 (24-70)                         |                                         | 2 (1-3)              |                           | 0 (0-0)                      |                                   |
| 2007 | Sierra Leone          | 365 (257-480)             |                                | 40 (28-53)                        |                                        | 154 (76-225)               |                                 | 17 (8-25)                          |                                         | 1 (0-1)              |                           | 0 (0-0)                      |                                   |
| 2008 | Sierra Leone          | 97 (68-127)               |                                | 10 (7-14)                         |                                        | 40 (20-59)                 |                                 | 4 (2-6)                            |                                         | 0 (0-0)              |                           | 0 (0-0)                      |                                   |
| 2009 | Sierra Leone          | 81 (57-108)               |                                | 9 (6-11)                          |                                        | 33 (18-48)                 |                                 | 4 (2-5)                            |                                         | 0 (0-0)              |                           | 0 (0-0)                      |                                   |
| 2010 | Sierra Leone          | 73 (52-96)                |                                | 8 (5-10)                          |                                        | 30 (17-41)                 |                                 | 3 (2-4)                            |                                         | 0 (0-0)              |                           | 0 (0-0)                      |                                   |
| 2011 | Sierra Leone          | 67 (47-88)                |                                | 7 (5-9)                           |                                        | 27 (15-38)                 |                                 | 3 (2-4)                            |                                         | 0 (0-0)              |                           | 0 (0-0)                      |                                   |
| 2012 | Sierra Leone          | 8 (6-11)                  |                                | 1 (1-1)                           |                                        | 3 (1-5)                    |                                 | 0 (0-0)                            |                                         | 0 (0-0)              |                           | 0 (0-0)                      |                                   |
| 2013 | Sierra Leone          | 8 (6-10)                  |                                | 1 (1-1)                           |                                        | 3 (1-5)                    |                                 | 0 (0-0)                            |                                         | 0 (0-0)              |                           | 0 (0-0)                      |                                   |
| 2014 | Sierra Leone          | 8 (6-10)                  |                                | 1 (1-1)                           |                                        | 3 (1-5)                    |                                 | 0 (0-0)                            |                                         | 0 (0-0)              |                           | 0 (0-0)                      |                                   |

Hib = *Haemophilus influenzae* type b; npnm = non-pneumonia, non-meningitis; HIV = deaths only in HIV-infected children; Uncertainty range provided in parentheses.

| Year | Country         | Hib pneumonia deaths (UR) | Hib pneumonia deaths, HIV (UR) | Hib pneumonia mortality rate (UR) | Hib pneumonia mortality rate, HIV (UR) | Hib meningitis deaths (UR) | Hib meningitis deaths, HIV (UR) | Hib meningitis mortality rate (UR) | Hib meningitis mortality rate, HIV (UR) | Hib NPNM deaths (UR) | Hib NPNM deaths, HIV (UR) | Hib NPNM mortality rate (UR) | Hib NPNM mortality rate, HIV (UR) |
|------|-----------------|---------------------------|--------------------------------|-----------------------------------|----------------------------------------|----------------------------|---------------------------------|------------------------------------|-----------------------------------------|----------------------|---------------------------|------------------------------|-----------------------------------|
| 2015 | Sierra Leone    | 8 (6-10)                  | 0 (0-0)                        | 1 (1-1)                           | 0 (0-0)                                | 3 (1-5)                    | 0 (0-0)                         | 0 (0-0)                            | 0 (0-0)                                 | 0 (0-0)              | 0 (0-0)                   | 0 (0-0)                      | 0 (0-0)                           |
| 2000 | Singapore       | 2 (2-3)                   |                                | 1 (1-1)                           |                                        | 1 (1-2)                    |                                 | 1 (0-1)                            |                                         | 0 (0-0)              |                           | 0 (0-0)                      | 0 (0-0)                           |
| 2001 | Singapore       | 3 (2-4)                   |                                | 1 (1-2)                           |                                        | 0 (0-1)                    |                                 | 0 (0-0)                            |                                         | 0 (0-0)              |                           | 0 (0-0)                      | 0 (0-0)                           |
| 2002 | Singapore       | 3 (2-4)                   |                                | 1 (1-2)                           |                                        | 1 (0-1)                    |                                 | 0 (0-1)                            |                                         | 0 (0-0)              |                           | 0 (0-0)                      | 0 (0-0)                           |
| 2003 | Singapore       | 5 (3-6)                   |                                | 2 (1-2)                           |                                        | 0 (0-0)                    |                                 | 0 (0-0)                            |                                         | 0 (0-0)              |                           | 0 (0-0)                      | 0 (0-0)                           |
| 2004 | Singapore       | 3 (2-5)                   |                                | 1 (1-2)                           |                                        | 0 (0-0)                    |                                 | 0 (0-0)                            |                                         | 0 (0-0)              |                           | 0 (0-0)                      | 0 (0-0)                           |
| 2005 | Singapore       | 4 (3-5)                   |                                | 2 (1-2)                           |                                        | 0 (0-1)                    |                                 | 0 (0-0)                            |                                         | 0 (0-0)              |                           | 0 (0-0)                      | 0 (0-0)                           |
| 2006 | Singapore       | 4 (3-5)                   |                                | 2 (1-2)                           |                                        | 0 (0-0)                    |                                 | 0 (0-0)                            |                                         | 0 (0-0)              |                           | 0 (0-0)                      | 0 (0-0)                           |
| 2007 | Singapore       | 5 (3-6)                   |                                | 2 (1-2)                           |                                        | 0 (0-1)                    |                                 | 0 (0-0)                            |                                         | 0 (0-0)              |                           | 0 (0-0)                      | 0 (0-0)                           |
| 2008 | Singapore       | 3 (2-3)                   |                                | 1 (1-1)                           |                                        | 0 (0-1)                    |                                 | 0 (0-0)                            |                                         | 0 (0-0)              |                           | 0 (0-0)                      | 0 (0-0)                           |
| 2009 | Singapore       | 3 (2-4)                   |                                | 1 (1-1)                           |                                        | 1 (0-1)                    |                                 | 0 (0-0)                            |                                         | 0 (0-0)              |                           | 0 (0-0)                      | 0 (0-0)                           |
| 2010 | Singapore       | 2 (1-2)                   |                                | 1 (1-1)                           |                                        | 0 (0-0)                    |                                 | 0 (0-0)                            |                                         | 0 (0-0)              |                           | 0 (0-0)                      | 0 (0-0)                           |
| 2011 | Singapore       | 2 (2-3)                   |                                | 1 (1-1)                           |                                        | 1 (0-1)                    |                                 | 0 (0-0)                            |                                         | 0 (0-0)              |                           | 0 (0-0)                      | 0 (0-0)                           |
| 2012 | Singapore       | 4 (3-5)                   |                                | 2 (1-2)                           |                                        | 0 (0-0)                    |                                 | 0 (0-0)                            |                                         | 0 (0-0)              |                           | 0 (0-0)                      | 0 (0-0)                           |
| 2013 | Singapore       | 1 (0-1)                   |                                | 0 (0-0)                           |                                        | 0 (0-0)                    |                                 | 0 (0-0)                            |                                         | 0 (0-0)              |                           | 0 (0-0)                      | 0 (0-0)                           |
| 2014 | Singapore       | 0 (0-1)                   |                                | 0 (0-0)                           |                                        | 0 (0-0)                    |                                 | 0 (0-0)                            |                                         | 0 (0-0)              |                           | 0 (0-0)                      | 0 (0-0)                           |
| 2015 | Singapore       | 0 (0-1)                   | 0 (0-0)                        | 0 (0-0)                           | 0 (0-0)                                | 0 (0-0)                    | 0 (0-0)                         | 0 (0-0)                            | 0 (0-0)                                 | 0 (0-0)              | 0 (0-0)                   | 0 (0-0)                      | 0 (0-0)                           |
| 2000 | Slovakia        | 2 (1-2)                   |                                | 1 (0-1)                           |                                        | 0 (0-1)                    |                                 | 0 (0-0)                            |                                         | 0 (0-0)              |                           | 0 (0-0)                      | 0 (0-0)                           |
| 2001 | Slovakia        | 0 (0-0)                   |                                | 0 (0-0)                           |                                        | 0 (0-0)                    |                                 | 0 (0-0)                            |                                         | 0 (0-0)              |                           | 0 (0-0)                      | 0 (0-0)                           |
| 2002 | Slovakia        | 0 (0-0)                   |                                | 0 (0-0)                           |                                        | 0 (0-0)                    |                                 | 0 (0-0)                            |                                         | 0 (0-0)              |                           | 0 (0-0)                      | 0 (0-0)                           |
| 2003 | Slovakia        | 0 (0-0)                   |                                | 0 (0-0)                           |                                        | 0 (0-0)                    |                                 | 0 (0-0)                            |                                         | 0 (0-0)              |                           | 0 (0-0)                      | 0 (0-0)                           |
| 2004 | Slovakia        | 0 (0-0)                   |                                | 0 (0-0)                           |                                        | 0 (0-0)                    |                                 | 0 (0-0)                            |                                         | 0 (0-0)              |                           | 0 (0-0)                      | 0 (0-0)                           |
| 2005 | Slovakia        | 0 (0-0)                   |                                | 0 (0-0)                           |                                        | 0 (0-0)                    |                                 | 0 (0-0)                            |                                         | 0 (0-0)              |                           | 0 (0-0)                      | 0 (0-0)                           |
| 2006 | Slovakia        | 0 (0-0)                   |                                | 0 (0-0)                           |                                        | 0 (0-0)                    |                                 | 0 (0-0)                            |                                         | 0 (0-0)              |                           | 0 (0-0)                      | 0 (0-0)                           |
| 2007 | Slovakia        | 0 (0-0)                   |                                | 0 (0-0)                           |                                        | 0 (0-0)                    |                                 | 0 (0-0)                            |                                         | 0 (0-0)              |                           | 0 (0-0)                      | 0 (0-0)                           |
| 2008 | Slovakia        | 0 (0-0)                   |                                | 0 (0-0)                           |                                        | 0 (0-0)                    |                                 | 0 (0-0)                            |                                         | 0 (0-0)              |                           | 0 (0-0)                      | 0 (0-0)                           |
| 2009 | Slovakia        | 0 (0-0)                   |                                | 0 (0-0)                           |                                        | 0 (0-0)                    |                                 | 0 (0-0)                            |                                         | 0 (0-0)              |                           | 0 (0-0)                      | 0 (0-0)                           |
| 2010 | Slovakia        | 0 (0-0)                   |                                | 0 (0-0)                           |                                        | 0 (0-0)                    |                                 | 0 (0-0)                            |                                         | 0 (0-0)              |                           | 0 (0-0)                      | 0 (0-0)                           |
| 2011 | Slovakia        | 0 (0-0)                   |                                | 0 (0-0)                           |                                        | 0 (0-0)                    |                                 | 0 (0-0)                            |                                         | 0 (0-0)              |                           | 0 (0-0)                      | 0 (0-0)                           |
| 2012 | Slovakia        | 0 (0-0)                   |                                | 0 (0-0)                           |                                        | 0 (0-0)                    |                                 | 0 (0-0)                            |                                         | 0 (0-0)              |                           | 0 (0-0)                      | 0 (0-0)                           |
| 2013 | Slovakia        | 0 (0-0)                   |                                | 0 (0-0)                           |                                        | 0 (0-0)                    |                                 | 0 (0-0)                            |                                         | 0 (0-0)              |                           | 0 (0-0)                      | 0 (0-0)                           |
| 2014 | Slovakia        | 0 (0-0)                   |                                | 0 (0-0)                           |                                        | 0 (0-0)                    |                                 | 0 (0-0)                            |                                         | 0 (0-0)              |                           | 0 (0-0)                      | 0 (0-0)                           |
| 2015 | Slovakia        | 0 (0-0)                   | 0 (0-0)                        | 0 (0-0)                           | 0 (0-0)                                | 0 (0-0)                    | 0 (0-0)                         | 0 (0-0)                            | 0 (0-0)                                 | 0 (0-0)              | 0 (0-0)                   | 0 (0-0)                      | 0 (0-0)                           |
| 2000 | Slovenia        | 0 (0-0)                   |                                | 0 (0-0)                           |                                        | 0 (0-0)                    |                                 | 0 (0-0)                            |                                         | 0 (0-0)              |                           | 0 (0-0)                      | 0 (0-0)                           |
| 2001 | Slovenia        | 0 (0-0)                   |                                | 0 (0-0)                           |                                        | 0 (0-0)                    |                                 | 0 (0-0)                            |                                         | 0 (0-0)              |                           | 0 (0-0)                      | 0 (0-0)                           |
| 2002 | Slovenia        | 0 (0-0)                   |                                | 0 (0-0)                           |                                        | 0 (0-0)                    |                                 | 0 (0-0)                            |                                         | 0 (0-0)              |                           | 0 (0-0)                      | 0 (0-0)                           |
| 2003 | Slovenia        | 0 (0-0)                   |                                | 0 (0-0)                           |                                        | 0 (0-0)                    |                                 | 0 (0-0)                            |                                         | 0 (0-0)              |                           | 0 (0-0)                      | 0 (0-0)                           |
| 2004 | Slovenia        | 0 (0-0)                   |                                | 0 (0-0)                           |                                        | 0 (0-0)                    |                                 | 0 (0-0)                            |                                         | 0 (0-0)              |                           | 0 (0-0)                      | 0 (0-0)                           |
| 2005 | Slovenia        | 0 (0-0)                   |                                | 0 (0-0)                           |                                        | 0 (0-0)                    |                                 | 0 (0-0)                            |                                         | 0 (0-0)              |                           | 0 (0-0)                      | 0 (0-0)                           |
| 2006 | Slovenia        | 0 (0-0)                   |                                | 0 (0-0)                           |                                        | 0 (0-0)                    |                                 | 0 (0-0)                            |                                         | 0 (0-0)              |                           | 0 (0-0)                      | 0 (0-0)                           |
| 2007 | Slovenia        | 0 (0-0)                   |                                | 0 (0-0)                           |                                        | 0 (0-0)                    |                                 | 0 (0-0)                            |                                         | 0 (0-0)              |                           | 0 (0-0)                      | 0 (0-0)                           |
| 2008 | Slovenia        | 0 (0-0)                   |                                | 0 (0-0)                           |                                        | 0 (0-0)                    |                                 | 0 (0-0)                            |                                         | 0 (0-0)              |                           | 0 (0-0)                      | 0 (0-0)                           |
| 2009 | Slovenia        | 0 (0-0)                   |                                | 0 (0-0)                           |                                        | 0 (0-0)                    |                                 | 0 (0-0)                            |                                         | 0 (0-0)              |                           | 0 (0-0)                      | 0 (0-0)                           |
| 2010 | Slovenia        | 0 (0-0)                   |                                | 0 (0-0)                           |                                        | 0 (0-0)                    |                                 | 0 (0-0)                            |                                         | 0 (0-0)              |                           | 0 (0-0)                      | 0 (0-0)                           |
| 2011 | Slovenia        | 0 (0-0)                   |                                | 0 (0-0)                           |                                        | 0 (0-0)                    |                                 | 0 (0-0)                            |                                         | 0 (0-0)              |                           | 0 (0-0)                      | 0 (0-0)                           |
| 2012 | Slovenia        | 0 (0-0)                   |                                | 0 (0-0)                           |                                        | 0 (0-0)                    |                                 | 0 (0-0)                            |                                         | 0 (0-0)              |                           | 0 (0-0)                      | 0 (0-0)                           |
| 2013 | Slovenia        | 0 (0-0)                   |                                | 0 (0-0)                           |                                        | 0 (0-0)                    |                                 | 0 (0-0)                            |                                         | 0 (0-0)              |                           | 0 (0-0)                      | 0 (0-0)                           |
| 2014 | Slovenia        | 0 (0-0)                   |                                | 0 (0-0)                           |                                        | 0 (0-0)                    |                                 | 0 (0-0)                            |                                         | 0 (0-0)              |                           | 0 (0-0)                      | 0 (0-0)                           |
| 2015 | Slovenia        | 0 (0-0)                   | 0 (0-0)                        | 0 (0-0)                           | 0 (0-0)                                | 0 (0-0)                    | 0 (0-0)                         | 0 (0-0)                            | 0 (0-0)                                 | 0 (0-0)              | 0 (0-0)                   | 0 (0-0)                      | 0 (0-0)                           |
| 2000 | Solomon Islands | 12 (8-16)                 |                                | 19 (13-25)                        |                                        | 7 (4-9)                    |                                 | 11 (6-14)                          |                                         | 0 (0-0)              |                           | 0 (0-0)                      | 0 (0-0)                           |
| 2001 | Solomon Islands | 12 (8-16)                 |                                | 19 (13-25)                        |                                        | 7 (4-10)                   |                                 | 11 (6-15)                          |                                         | 0 (0-0)              |                           | 0 (0-0)                      | 0 (0-0)                           |
| 2002 | Solomon Islands | 13 (8-16)                 |                                | 19 (13-25)                        |                                        | 8 (4-10)                   |                                 | 12 (6-15)                          |                                         | 0 (0-0)              |                           | 0 (0-0)                      | 0 (0-0)                           |
| 2003 | Solomon Islands | 13 (8-17)                 |                                | 19 (13-25)                        |                                        | 8 (4-10)                   |                                 | 12 (6-15)                          |                                         | 0 (0-0)              |                           | 0 (0-0)                      | 0 (0-0)                           |
| 2004 | Solomon Islands | 13 (8-18)                 |                                | 19 (14-25)                        |                                        | 8 (4-11)                   |                                 | 12 (6-15)                          |                                         | 0 (0-0)              |                           | 0 (0-0)                      | 0 (0-0)                           |
| 2005 | Solomon Islands | 14 (10-18)                |                                | 19 (14-25)                        |                                        | 8 (4-11)                   |                                 | 12 (6-15)                          |                                         | 0 (0-0)              |                           | 0 (0-0)                      | 0 (0-0)                           |
| 2006 | Solomon Islands | 14 (10-19)                |                                | 19 (14-26)                        |                                        | 9 (4-11)                   |                                 | 12 (6-15)                          |                                         | 0 (0-0)              |                           | 0 (0-0)                      | 0 (0-0)                           |
| 2007 | Solomon Islands | 14 (10-19)                |                                | 19 (13-25)                        |                                        | 9 (4-11)                   |                                 | 11 (6-15)                          |                                         | 0 (0-0)              |                           | 0 (0-0)                      | 0 (0-0)                           |
| 2008 | Solomon Islands | 2 (2-3)                   |                                | 3 (2-4)                           |                                        | 1 (1-2)                    |                                 | 2 (1-2)                            |                                         | 0 (0-0)              |                           | 0 (0-0)                      | 0 (0-0)                           |
| 2009 | Solomon Islands | 1 (1-1)                   |                                | 1 (1-2)                           |                                        | 1 (0-1)                    |                                 | 1 (0-1)                            |                                         | 0 (0-0)              |                           | 0 (0-0)                      | 0 (0-0)                           |
| 2010 | Solomon Islands | 1 (1-2)                   |                                | 1 (1-2)                           |                                        | 1 (0-1)                    |                                 | 1 (0-1)                            |                                         | 0 (0-0)              |                           | 0 (0-0)                      | 0 (0-0)                           |
| 2011 | Solomon Islands | 1 (1-1)                   |                                | 1 (1-1)                           |                                        | 0 (0-1)                    |                                 | 0 (0-0)                            |                                         | 0 (0-0)              |                           | 0 (0-0)                      | 0 (0-0)                           |
| 2012 | Solomon Islands | 1 (1-1)                   |                                | 1 (1-1)                           |                                        | 0 (0-1)                    |                                 | 0 (0-0)                            |                                         | 0 (0-0)              |                           | 0 (0-0)                      | 0 (0-0)                           |
| 2013 | Solomon Islands | 0 (0-0)                   |                                | 0 (0-0)                           |                                        | 0 (0-0)                    |                                 | 0 (0-0)                            |                                         | 0 (0-0)              |                           | 0 (0-0)                      | 0 (0-0)                           |
| 2014 | Solomon Islands | 0 (0-0)                   |                                | 0 (0-0)                           |                                        | 0 (0-0)                    |                                 | 0 (0-0)                            |                                         | 0 (0-0)              |                           | 0 (0-0)                      | 0 (0-0)                           |
| 2015 | Solomon Islands | 0 (0-0)                   | 0 (0-0)                        | 0 (0-0)                           | 0 (0-0)                                | 0 (0-0)                    | 0 (0-0)                         | 0 (0-0)                            | 0 (0-0)                                 | 0 (0-0)              | 0 (0-0)                   | 0 (0-0)                      | 0 (0-0)                           |
| 2000 | Somalia         | 1668 (1173-2192)          |                                | 115 (81-152)                      |                                        | 834 (351-1270)             |                                 | 58 (24-88)                         |                                         | 3 (1-5)              |                           | 0 (0-0)                      | 0 (0-0)                           |
| 2001 | Somalia         | 1689 (1188-2220)          |                                | 113 (79-148)                      |                                        | 846 (356-1288)             |                                 | 56 (24-86)                         |                                         | 3 (1-5)              |                           | 0 (0-0)                      | 0 (0-0)                           |
| 2002 | Somalia         | 1750 (1231-2300)          |                                | 114 (80-150)                      |                                        | 877 (369-1335)             |                                 | 57 (24-87)                         |                                         | 4 (2-5)              |                           | 0 (0-0)                      | 0 (0-0)                           |
| 2003 | Somalia         | 1868 (1314-2455)          |                                | 120 (85-158)                      |                                        | 936 (394-1425)             |                                 | 60 (25-92)                         |                                         | 4 (2-6)              |                           | 0 (0-0)                      | 0 (0-0)                           |
| 2004 | Somalia         | 1922 (1352-2525)          |                                | 122 (86-160)                      |                                        | 962 (405-1465)             |                                 | 61 (26-93)                         |                                         | 4 (2-6)              |                           | 0 (0-0)                      | 0 (0-0)                           |
| 2005 | Somalia         | 1994 (1402-2620)          |                                | 125 (88-164)                      |                                        | 996 (419-1516)             |                                 | 62 (26-95)                         |                                         | 4 (2-6)              |                           | 0 (0-0)                      | 0 (0-0)                           |
| 2006 | Somalia         | 2070 (1456-2720)          |                                | 127 (89-167)                      |                                        | 1032 (434-1572)            |                                 | 63 (27-97)                         |                                         | 4 (2-6)              |                           | 0 (0-0)                      | 0 (0-0)                           |
| 2007 | Somalia         | 2151 (1513-2826)          |                                | 129 (91-170)                      |                                        | 1071 (451-1631)            |                                 | 64 (27-98)                         |                                         | 4 (2-7)              |                           | 0 (0-0)                      | 0 (0-0)                           |
| 2008 | Somalia         | 2211 (1555-2906)          |                                | 130 (91-170)                      |                                        | 1100 (464-1675)            |                                 | 64 (27-98)                         |                                         | 4 (2-7)              |                           | 0 (0-0)                      | 0 (0-0)                           |
| 2009 | Somalia         | 2250 (1583-2956)          |                                | 129 (91-169)                      |                                        | 1120 (472-1704)            |                                 | 64 (27-97)                         |                                         | 5 (2-7)              |                           | 0 (0-0)                      | 0 (0-0)                           |
| 2010 | Somalia         | 2263 (1592-2974)          |                                | 127 (89-167)                      |                                        | 1126 (475-1713)            |                                 | 63 (27-96)                         |                                         | 5 (2-7)              |                           | 0 (0-0)                      | 0 (0-0)                           |
| 2011 | Somalia         | 2236 (1572-2937)          |                                | 122 (86-160)                      |                                        | 1111 (470-1689)            |                                 | 61 (26-92)                         |                                         | 5 (2-7)              |                           | 0 (0-0)                      | 0 (0-0)                           |
| 2012 | Somalia         | 2186 (1538-2873)          |                                | 118 (83-155)                      |                                        | 1084 (459-1648)            |                                 | 58 (25-89)                         |                                         | 4 (2-7)              |                           | 0 (0-0)                      | 0 (0-0)                           |
| 2013 | Somalia         | 1342 (944-1764)           |                                | 71 (50-94)                        |                                        | 664 (177-1109)             |                                 | 35 (9-59)                          |                                         | 3 (1-5)              |                           | 0 (0-0)                      | 0 (0-0)                           |
| 2014 | Somalia         | 339 (238-445)             |                                | 18 (13-23)                        |                                        | 167 (45-279)               |                                 | 9 (2-15)                           |                                         | 1 (0-1)              |                           | 0 (0-0)                      | 0 (0-0)                           |
| 2015 | Somalia         | 334 (235-439)             | 3 (2-3)                        | 17 (12-23)                        | 0 (0-0)                                | 165 (44-275)               | 1 (0-2)                         | 8 (2-14)                           | 0 (0-0)                                 | 1 (0-1)              | 0 (0-0)                   | 0 (0-0)                      | 0 (0-0)                           |
| 2000 | South Africa    | 544 (383-715)             |                                | 10 (7-13)                         |                                        | 126 (51-196)               |                                 | 2 (1-4)                            |                                         | 1 (0-1)              |                           | 0 (0-0)                      | 0 (0-0)                           |
| 2001 | South Africa    | 243 (171-319)             |                                | 5 (3-8)                           |                                        | 56 (22-87)                 |                                 | 1 (0-2)                            |                                         | 0 (0-0)              |                           | 0 (0-0)                      | 0 (0-0)                           |
| 2002 | South Africa    | 235 (165-308)             |                                | 4 (3-6)                           |                                        | 54 (21-83)                 |                                 | 1 (0-2)                            |                                         | 0 (0-0)              |                           | 0 (0-0)                      | 0 (0-0)                           |
| 2003 | South Africa    | 221 (156-291)             |                                | 4 (3-6)                           |                                        | 50 (20-78)                 |                                 | 1 (0-1)                            |                                         | 0 (0-0)              |                           | 0 (0-0)                      | 0 (0-0)                           |
| 2004 | South Africa    | 221 (156-291)             |                                | 4 (3-6)                           |                                        | 50 (20-77)                 |                                 | 1 (0-2)                            |                                         | 0 (0-0)              |                           | 0 (0-0)                      | 0 (0-0)                           |
| 2005 | South Africa    | 17 (12-22)                |                                | 0 (0-0)                           |                                        | 4 (2-6)                    |                                 | 0 (0-0)                            |                                         | 0 (0-0)              |                           | 0 (0-0)                      | 0 (0-0)                           |
| 2006 | South Africa    | 17 (12-22)                |                                | 0 (0-0)                           |                                        | 4 (1-6)                    |                                 | 0 (0-0)                            |                                         | 0 (0-0)              |                           | 0 (0-0)                      | 0 (0-0)                           |

Hib = *Haemophilus influenzae* type b; npnm = non-pneumonia, non-meningitis; HIV = deaths only in HIV-infected children; Uncertainty range provided in parentheses.

| Year | Country      | Hib pneumonia deaths (UR) | Hib pneumonia deaths, HIV (UR) | Hib pneumonia mortality rate (UR) | Hib pneumonia mortality rate, HIV (UR) | Hib meningitis deaths (UR) | Hib meningitis deaths, HIV (UR) | Hib meningitis mortality rate (UR) | Hib meningitis mortality rate, HIV (UR) | Hib NPNM deaths (UR) | Hib NPNM deaths, HIV (UR) | Hib NPNM mortality rate (UR) | Hib NPNM mortality rate, HIV (UR) |
|------|--------------|---------------------------|--------------------------------|-----------------------------------|----------------------------------------|----------------------------|---------------------------------|------------------------------------|-----------------------------------------|----------------------|---------------------------|------------------------------|-----------------------------------|
| 2007 | South Africa | 18 (12-23)                |                                | 0 (0-0)                           |                                        | 4 (1-6)                    |                                 | 0 (0-0)                            |                                         | 0 (0-0)              |                           | 0 (0-0)                      |                                   |
| 2008 | South Africa | 19 (13-24)                |                                | 0 (0-0)                           |                                        | 4 (2-6)                    |                                 | 0 (0-0)                            |                                         | 0 (0-0)              |                           | 0 (0-0)                      |                                   |
| 2009 | South Africa | 19 (13-25)                |                                | 0 (0-0)                           |                                        | 4 (2-6)                    |                                 | 0 (0-0)                            |                                         | 0 (0-0)              |                           | 0 (0-0)                      |                                   |
| 2010 | South Africa | 19 (14-25)                |                                | 0 (0-0)                           |                                        | 4 (2-7)                    |                                 | 0 (0-0)                            |                                         | 0 (0-0)              |                           | 0 (0-0)                      |                                   |
| 2011 | South Africa | 19 (13-25)                |                                | 0 (0-0)                           |                                        | 4 (2-6)                    |                                 | 0 (0-0)                            |                                         | 0 (0-0)              |                           | 0 (0-0)                      |                                   |
| 2012 | South Africa | 18 (13-24)                |                                | 0 (0-0)                           |                                        | 4 (2-6)                    |                                 | 0 (0-0)                            |                                         | 0 (0-0)              |                           | 0 (0-0)                      |                                   |
| 2013 | South Africa | 212 (149-278)             |                                | 4 (3-5)                           |                                        | 45 (18-71)                 |                                 | 1 (0-1)                            |                                         | 0 (0-1)              |                           | 0 (0-0)                      |                                   |
| 2014 | South Africa | 16 (11-21)                |                                | 0 (0-0)                           |                                        | 3 (1-5)                    |                                 | 0 (0-0)                            |                                         | 0 (0-0)              |                           | 0 (0-0)                      |                                   |
| 2015 | South Africa | 15 (11-20)                | 1 (1-2)                        | 0 (0-0)                           | 0 (0-0)                                | 3 (1-5)                    | 0 (0-0)                         | 0 (0-0)                            | 0 (0-0)                                 | 0 (0-0)              | 0 (0-0)                   | 0 (0-0)                      | 0 (0-0)                           |
| 2000 | South Sudan  | 1285 (904-1688)           |                                | 110 (77-144)                      |                                        | 453 (213-672)              |                                 | 39 (18-57)                         |                                         | 2 (1-3)              |                           | 0 (0-0)                      |                                   |
| 2001 | South Sudan  | 1285 (904-1688)           |                                | 106 (74-139)                      |                                        | 450 (212-666)              |                                 | 37 (17-55)                         |                                         | 2 (1-3)              |                           | 0 (0-0)                      |                                   |
| 2002 | South Sudan  | 1243 (874-1633)           |                                | 99 (70-130)                       |                                        | 431 (205-637)              |                                 | 34 (16-51)                         |                                         | 2 (1-3)              |                           | 0 (0-0)                      |                                   |
| 2003 | South Sudan  | 1197 (842-1573)           |                                | 93 (66-123)                       |                                        | 411 (196-606)              |                                 | 32 (15-47)                         |                                         | 2 (1-2)              |                           | 0 (0-0)                      |                                   |
| 2004 | South Sudan  | 1157 (814-1520)           |                                | 88 (62-116)                       |                                        | 393 (127-637)              |                                 | 30 (10-49)                         |                                         | 2 (1-3)              |                           | 0 (0-0)                      |                                   |
| 2005 | South Sudan  | 1098 (772-1443)           |                                | 81 (57-107)                       |                                        | 370 (121-598)              |                                 | 27 (9-44)                          |                                         | 2 (0-2)              |                           | 0 (0-0)                      |                                   |
| 2006 | South Sudan  | 1071 (753-1407)           |                                | 77 (54-101)                       |                                        | 356 (117-574)              |                                 | 25 (8-41)                          |                                         | 1 (0-2)              |                           | 0 (0-0)                      |                                   |
| 2007 | South Sudan  | 1050 (739-1380)           |                                | 72 (51-95)                        |                                        | 346 (115-557)              |                                 | 24 (8-38)                          |                                         | 1 (0-2)              |                           | 0 (0-0)                      |                                   |
| 2008 | South Sudan  | 1065 (749-1400)           |                                | 71 (50-93)                        |                                        | 350 (117-563)              |                                 | 23 (8-37)                          |                                         | 1 (0-2)              |                           | 0 (0-0)                      |                                   |
| 2009 | South Sudan  | 1063 (748-1397)           |                                | 68 (48-89)                        |                                        | 351 (118-564)              |                                 | 22 (8-36)                          |                                         | 1 (0-2)              |                           | 0 (0-0)                      |                                   |
| 2010 | South Sudan  | 1064 (748-1397)           |                                | 65 (46-86)                        |                                        | 357 (121-573)              |                                 | 22 (7-35)                          |                                         | 1 (0-2)              |                           | 0 (0-0)                      |                                   |
| 2011 | South Sudan  | 1061 (746-1394)           |                                | 63 (44-82)                        |                                        | 365 (125-585)              |                                 | 21 (7-34)                          |                                         | 1 (1-2)              |                           | 0 (0-0)                      |                                   |
| 2012 | South Sudan  | 1021 (718-1341)           |                                | 58 (41-76)                        |                                        | 359 (123-574)              |                                 | 20 (7-33)                          |                                         | 1 (1-2)              |                           | 0 (0-0)                      |                                   |
| 2013 | South Sudan  | 1027 (723-1350)           |                                | 56 (40-74)                        |                                        | 368 (127-588)              |                                 | 20 (7-32)                          |                                         | 1 (1-2)              |                           | 0 (0-0)                      |                                   |
| 2014 | South Sudan  | 1007 (708-1324)           |                                | 54 (38-70)                        |                                        | 366 (127-584)              |                                 | 19 (7-31)                          |                                         | 1 (1-2)              |                           | 0 (0-0)                      |                                   |
| 2015 | South Sudan  | 755 (531-992)             | 26 (18-34)                     | 39 (25-52)                        | 1 (1-2)                                | 278 (96-440)               | 9 (3-15)                        | 14 (5-23)                          | 0 (0-1)                                 | 1 (0-2)              | 0 (0-0)                   | 0 (0-0)                      | 0 (0-0)                           |
| 2000 | Spain        | 1 (0-1)                   |                                | 0 (0-0)                           |                                        | 1 (1-3)                    |                                 | 0 (0-0)                            |                                         | 0 (0-0)              |                           | 0 (0-0)                      |                                   |
| 2001 | Spain        | 0 (0-0)                   |                                | 0 (0-0)                           |                                        | 1 (0-1)                    |                                 | 0 (0-0)                            |                                         | 0 (0-0)              |                           | 0 (0-0)                      |                                   |
| 2002 | Spain        | 1 (0-1)                   |                                | 0 (0-0)                           |                                        | 1 (0-1)                    |                                 | 0 (0-0)                            |                                         | 0 (0-0)              |                           | 0 (0-0)                      |                                   |
| 2003 | Spain        | 0 (0-0)                   |                                | 0 (0-0)                           |                                        | 0 (0-0)                    |                                 | 0 (0-0)                            |                                         | 0 (0-0)              |                           | 0 (0-0)                      |                                   |
| 2004 | Spain        | 0 (0-0)                   |                                | 0 (0-0)                           |                                        | 0 (0-0)                    |                                 | 0 (0-0)                            |                                         | 0 (0-0)              |                           | 0 (0-0)                      |                                   |
| 2005 | Spain        | 0 (0-0)                   |                                | 0 (0-0)                           |                                        | 0 (0-0)                    |                                 | 0 (0-0)                            |                                         | 0 (0-0)              |                           | 0 (0-0)                      |                                   |
| 2006 | Spain        | 0 (0-0)                   |                                | 0 (0-0)                           |                                        | 0 (0-0)                    |                                 | 0 (0-0)                            |                                         | 0 (0-0)              |                           | 0 (0-0)                      |                                   |
| 2007 | Spain        | 0 (0-0)                   |                                | 0 (0-0)                           |                                        | 0 (0-0)                    |                                 | 0 (0-0)                            |                                         | 0 (0-0)              |                           | 0 (0-0)                      |                                   |
| 2008 | Spain        | 0 (0-0)                   |                                | 0 (0-0)                           |                                        | 0 (0-0)                    |                                 | 0 (0-0)                            |                                         | 0 (0-0)              |                           | 0 (0-0)                      |                                   |
| 2009 | Spain        | 0 (0-0)                   |                                | 0 (0-0)                           |                                        | 0 (0-0)                    |                                 | 0 (0-0)                            |                                         | 0 (0-0)              |                           | 0 (0-0)                      |                                   |
| 2010 | Spain        | 0 (0-0)                   |                                | 0 (0-0)                           |                                        | 0 (0-0)                    |                                 | 0 (0-0)                            |                                         | 0 (0-0)              |                           | 0 (0-0)                      |                                   |
| 2011 | Spain        | 0 (0-0)                   |                                | 0 (0-0)                           |                                        | 0 (0-0)                    |                                 | 0 (0-0)                            |                                         | 0 (0-0)              |                           | 0 (0-0)                      |                                   |
| 2012 | Spain        | 0 (0-0)                   |                                | 0 (0-0)                           |                                        | 0 (0-0)                    |                                 | 0 (0-0)                            |                                         | 0 (0-0)              |                           | 0 (0-0)                      |                                   |
| 2013 | Spain        | 0 (0-0)                   |                                | 0 (0-0)                           |                                        | 0 (0-0)                    |                                 | 0 (0-0)                            |                                         | 0 (0-0)              |                           | 0 (0-0)                      |                                   |
| 2014 | Spain        | 0 (0-0)                   |                                | 0 (0-0)                           |                                        | 0 (0-0)                    |                                 | 0 (0-0)                            |                                         | 0 (0-0)              |                           | 0 (0-0)                      |                                   |
| 2015 | Spain        | 0 (0-0)                   | 0 (0-0)                        | 0 (0-0)                           | 0 (0-0)                                | 0 (0-0)                    | 0 (0-0)                         | 0 (0-0)                            | 0 (0-0)                                 | 0 (0-0)              | 0 (0-0)                   | 0 (0-0)                      | 0 (0-0)                           |
| 2000 | Sri Lanka    | 64 (45-84)                |                                | 4 (3-5)                           |                                        | 18 (2-31)                  |                                 | 1 (0-2)                            |                                         | 0 (0-0)              |                           | 0 (0-0)                      |                                   |
| 2001 | Sri Lanka    | 60 (42-79)                |                                | 4 (3-5)                           |                                        | 17 (2-30)                  |                                 | 1 (0-2)                            |                                         | 0 (0-0)              |                           | 0 (0-0)                      |                                   |
| 2002 | Sri Lanka    | 57 (40-75)                |                                | 3 (2-5)                           |                                        | 16 (2-28)                  |                                 | 1 (0-2)                            |                                         | 0 (0-0)              |                           | 0 (0-0)                      |                                   |
| 2003 | Sri Lanka    | 56 (39-74)                |                                | 3 (2-4)                           |                                        | 16 (2-28)                  |                                 | 1 (0-2)                            |                                         | 0 (0-0)              |                           | 0 (0-0)                      |                                   |
| 2004 | Sri Lanka    | 41 (29-54)                |                                | 2 (2-3)                           |                                        | 12 (1-21)                  |                                 | 1 (0-1)                            |                                         | 0 (0-0)              |                           | 0 (0-0)                      |                                   |
| 2005 | Sri Lanka    | 51 (36-67)                |                                | 3 (2-4)                           |                                        | 15 (2-25)                  |                                 | 1 (0-1)                            |                                         | 0 (0-0)              |                           | 0 (0-0)                      |                                   |
| 2006 | Sri Lanka    | 46 (32-61)                |                                | 3 (2-3)                           |                                        | 14 (2-23)                  |                                 | 1 (0-1)                            |                                         | 0 (0-0)              |                           | 0 (0-0)                      |                                   |
| 2007 | Sri Lanka    | 42 (30-55)                |                                | 2 (2-3)                           |                                        | 12 (2-21)                  |                                 | 1 (0-1)                            |                                         | 0 (0-0)              |                           | 0 (0-0)                      |                                   |
| 2008 | Sri Lanka    | 39 (28-51)                |                                | 2 (2-3)                           |                                        | 11 (1-20)                  |                                 | 1 (0-1)                            |                                         | 0 (0-0)              |                           | 0 (0-0)                      |                                   |
| 2009 | Sri Lanka    | 36 (26-48)                |                                | 2 (1-3)                           |                                        | 11 (1-18)                  |                                 | 1 (0-1)                            |                                         | 0 (0-0)              |                           | 0 (0-0)                      |                                   |
| 2010 | Sri Lanka    | 6 (4-8)                   |                                | 0 (0-0)                           |                                        | 3 (0-5)                    |                                 | 0 (0-0)                            |                                         | 0 (0-0)              |                           | 0 (0-0)                      |                                   |
| 2011 | Sri Lanka    | 2 (2-3)                   |                                | 0 (0-0)                           |                                        | 1 (0-2)                    |                                 | 0 (0-0)                            |                                         | 0 (0-0)              |                           | 0 (0-0)                      |                                   |
| 2012 | Sri Lanka    | 2 (2-3)                   |                                | 0 (0-0)                           |                                        | 1 (0-2)                    |                                 | 0 (0-0)                            |                                         | 0 (0-0)              |                           | 0 (0-0)                      |                                   |
| 2013 | Sri Lanka    | 2 (1-3)                   |                                | 0 (0-0)                           |                                        | 1 (0-2)                    |                                 | 0 (0-0)                            |                                         | 0 (0-0)              |                           | 0 (0-0)                      |                                   |
| 2014 | Sri Lanka    | 2 (1-3)                   |                                | 0 (0-0)                           |                                        | 1 (0-2)                    |                                 | 0 (0-0)                            |                                         | 0 (0-0)              |                           | 0 (0-0)                      |                                   |
| 2015 | Sri Lanka    | 0 (0-0)                   | 0 (0-0)                        | 0 (0-0)                           | 0 (0-0)                                | 0 (0-0)                    | 0 (0-0)                         | 0 (0-0)                            | 0 (0-0)                                 | 0 (0-0)              | 0 (0-0)                   | 0 (0-0)                      | 0 (0-0)                           |
| 2000 | Sudan        | 3198 (2246-4202)          |                                | 88 (48-89)                        |                                        | 1091 (480-1651)            |                                 | 23 (10-35)                         |                                         | 4 (2-7)              |                           | 0 (0-0)                      |                                   |
| 2001 | Sudan        | 3285 (2311-4317)          |                                | 88 (48-89)                        |                                        | 1115 (481-1697)            |                                 | 23 (10-35)                         |                                         | 5 (2-7)              |                           | 0 (0-0)                      |                                   |
| 2002 | Sudan        | 3280 (2307-4310)          |                                | 67 (47-88)                        |                                        | 1107 (468-1694)            |                                 | 22 (10-34)                         |                                         | 5 (2-7)              |                           | 0 (0-0)                      |                                   |
| 2003 | Sudan        | 3284 (2310-4315)          |                                | 65 (46-86)                        |                                        | 1101 (456-1694)            |                                 | 22 (9-34)                          |                                         | 4 (2-7)              |                           | 0 (0-0)                      |                                   |
| 2004 | Sudan        | 3261 (2294-4285)          |                                | 63 (45-83)                        |                                        | 1086 (441-1678)            |                                 | 21 (9-33)                          |                                         | 4 (2-7)              |                           | 0 (0-0)                      |                                   |
| 2005 | Sudan        | 3141 (2209-4127)          |                                | 60 (42-79)                        |                                        | 1038 (414-1611)            |                                 | 20 (8-31)                          |                                         | 4 (2-7)              |                           | 0 (0-0)                      |                                   |
| 2006 | Sudan        | 3090 (2173-4059)          |                                | 58 (41-76)                        |                                        | 1013 (396-1579)            |                                 | 19 (7-30)                          |                                         | 4 (2-6)              |                           | 0 (0-0)                      |                                   |
| 2007 | Sudan        | 3014 (2120-3961)          |                                | 56 (39-73)                        |                                        | 982 (378-1537)             |                                 | 18 (7-28)                          |                                         | 4 (2-6)              |                           | 0 (0-0)                      |                                   |
| 2008 | Sudan        | 576 (405-757)             |                                | 11 (7-14)                         |                                        | 187 (71-294)               |                                 | 3 (1-5)                            |                                         | 1 (0-1)              |                           | 0 (0-0)                      |                                   |
| 2009 | Sudan        | 328 (231-431)             |                                | 6 (4-8)                           |                                        | 106 (39-167)               |                                 | 2 (1-3)                            |                                         | 0 (0-1)              |                           | 0 (0-0)                      |                                   |
| 2010 | Sudan        | 304 (214-400)             |                                | 5 (4-7)                           |                                        | 99 (36-156)                |                                 | 2 (1-3)                            |                                         | 0 (0-1)              |                           | 0 (0-0)                      |                                   |
| 2011 | Sudan        | 214 (151-282)             |                                | 4 (3-5)                           |                                        | 70 (25-110)                |                                 | 1 (0-2)                            |                                         | 0 (0-0)              |                           | 0 (0-0)                      |                                   |
| 2012 | Sudan        | 212 (149-279)             |                                | 4 (3-5)                           |                                        | 69 (24-110)                |                                 | 1 (0-2)                            |                                         | 0 (0-0)              |                           | 0 (0-0)                      |                                   |
| 2013 | Sudan        | 27 (19-36)                |                                | 0 (0-1)                           |                                        | 9 (3-15)                   |                                 | 0 (0-0)                            |                                         | 0 (0-0)              |                           | 0 (0-0)                      |                                   |
| 2014 | Sudan        | 27 (19-35)                |                                | 0 (0-1)                           |                                        | 9 (3-15)                   |                                 | 0 (0-0)                            |                                         | 0 (0-0)              |                           | 0 (0-0)                      |                                   |
| 2015 | Sudan        | 26 (19-35)                | 0 (0-0)                        | 0 (0-1)                           | 0 (0-0)                                | 9 (3-14)                   | 0 (0-0)                         | 0 (0-0)                            | 0 (0-0)                                 | 0 (0-0)              | 0 (0-0)                   | 0 (0-0)                      | 0 (0-0)                           |
| 2000 | Suriname     | 4 (2-5)                   |                                | 7 (5-9)                           |                                        | 3 (1-5)                    |                                 | 6 (2-10)                           |                                         | 0 (0-0)              |                           | 0 (0-0)                      |                                   |
| 2001 | Suriname     | 4 (3-5)                   |                                | 7 (5-9)                           |                                        | 2 (1-4)                    |                                 | 4 (1-7)                            |                                         | 0 (0-0)              |                           | 0 (0-0)                      |                                   |
| 2002 | Suriname     | 2 (1-3)                   |                                | 4 (3-5)                           |                                        | 5 (2-9)                    |                                 | 11 (3-17)                          |                                         | 0 (0-0)              |                           | 0 (0-0)                      |                                   |
| 2003 | Suriname     | 6 (4-7)                   |                                | 11 (8-14)                         |                                        | 1 (0-2)                    |                                 | 3 (1-4)                            |                                         | 0 (0-0)              |                           | 0 (0-0)                      |                                   |
| 2004 | Suriname     | 2 (2-3)                   |                                | 4 (3-6)                           |                                        | 2 (1-4)                    |                                 | 5 (2-8)                            |                                         | 0 (0-0)              |                           | 0 (0-0)                      |                                   |
| 2005 | Suriname     | 1 (1-1)                   |                                | 2 (1-2)                           |                                        | 0 (0-0)                    |                                 | 0 (0-1)                            |                                         | 0 (0-0)              |                           | 0 (0-0)                      |                                   |
| 2006 | Suriname     | 0 (0-0)                   |                                | 1 (0-1)                           |                                        | 0 (0-1)                    |                                 | 1 (0-1)                            |                                         | 0 (0-0)              |                           | 0 (0-0)                      |                                   |
| 2007 | Suriname     | 0 (0-1)                   |                                | 1 (1-1)                           |                                        | 0 (0-0)                    |                                 | 0 (0-0)                            |                                         | 0 (0-0)              |                           | 0 (0-0)                      |                                   |
| 2008 | Suriname     | 0 (0-0)                   |                                | 1 (0-1)                           |                                        | 0 (0-1)                    |                                 | 1 (0-1)                            |                                         | 0 (0-0)              |                           | 0 (0-0)                      |                                   |
| 2009 | Suriname     | 0 (0-1)                   |                                | 1 (1-1)                           |                                        | 1 (0-1)                    |                                 | 1 (0-1)                            |                                         | 0 (0-0)              |                           | 0 (0-0)                      |                                   |
| 2010 | Suriname     | 0 (0-0)                   |                                | 0 (0-0)                           |                                        | 0 (0-0)                    |                                 | 0 (0-0)                            |                                         | 0 (0-0)              |                           | 0 (0-0)                      |                                   |
| 2011 | Suriname     | 0 (0-0)                   |                                | 0 (0-0)                           |                                        | 0 (0-0)                    |                                 | 0 (0-0)                            |                                         | 0 (0-0)              |                           | 0 (0-0)                      |                                   |
| 2012 | Suriname     | 0 (0-0)                   |                                | 0 (0-0)                           |                                        | 0 (0-0)                    |                                 | 0 (0-0)                            |                                         | 0 (0-0)              |                           | 0 (0-0)                      |                                   |
| 2013 | Suriname     | 0 (0-0)                   |                                | 0 (0-0)                           |                                        | 0 (0-0)                    |                                 | 0 (0-0)                            |                                         | 0 (0-0)              |                           | 0 (0-0)                      |                                   |
| 2014 | Suriname     | 0 (0-0)                   |                                | 0 (0-0)                           |                                        | 0 (0-0)                    |                                 | 0 (0-0)                            |                                         | 0 (0-0)              |                           | 0 (0-0)                      |                                   |

Hib = *Haemophilus influenzae* type b; npnm = non-pneumonia, non-meningitis; HIV = deaths only in HIV-infected children; Uncertainty range provided in parentheses.

| Year | Country              | Hib pneumonia deaths (UR) | Hib pneumonia deaths, HIV (UR) | Hib pneumonia mortality rate (UR) | Hib pneumonia mortality rate, HIV (UR) | Hib meningitis deaths (UR) | Hib meningitis deaths, HIV (UR) | Hib meningitis mortality rate (UR) | Hib meningitis mortality rate, HIV (UR) | Hib NPM deaths (UR) | Hib NPM deaths, HIV (UR) | Hib NPM mortality rate (UR) | Hib NPM mortality rate, HIV (UR) |
|------|----------------------|---------------------------|--------------------------------|-----------------------------------|----------------------------------------|----------------------------|---------------------------------|------------------------------------|-----------------------------------------|---------------------|--------------------------|-----------------------------|----------------------------------|
| 2015 | Suriname             | 0 (0-0)                   | 0 (0-0)                        | 0 (0-0)                           | 0 (0-0)                                | 0 (0-0)                    | 0 (0-0)                         | 0 (0-0)                            | 0 (0-0)                                 | 0 (0-0)             | 0 (0-0)                  | 0 (0-0)                     | 0 (0-0)                          |
| 2000 | Swaziland            | 102 (72-134)              |                                | 66 (48-87)                        |                                        | 27 (10-43)                 |                                 | 18 (7-28)                          |                                         | 0 (0-0)             |                          | 0 (0-0)                     | 0 (0-0)                          |
| 2001 | Swaziland            | 105 (74-138)              |                                | 68 (48-90)                        |                                        | 28 (11-44)                 |                                 | 18 (7-29)                          |                                         | 0 (0-0)             |                          | 0 (0-0)                     | 0 (0-0)                          |
| 2002 | Swaziland            | 107 (75-140)              |                                | 70 (49-92)                        |                                        | 29 (11-45)                 |                                 | 19 (7-29)                          |                                         | 0 (0-0)             |                          | 0 (0-0)                     | 0 (0-0)                          |
| 2003 | Swaziland            | 108 (76-142)              |                                | 71 (50-93)                        |                                        | 29 (12-45)                 |                                 | 19 (8-29)                          |                                         | 0 (0-0)             |                          | 0 (0-0)                     | 0 (0-0)                          |
| 2004 | Swaziland            | 108 (76-142)              |                                | 71 (50-93)                        |                                        | 29 (12-44)                 |                                 | 19 (8-29)                          |                                         | 0 (0-0)             |                          | 0 (0-0)                     | 0 (0-0)                          |
| 2005 | Swaziland            | 108 (76-141)              |                                | 70 (50-93)                        |                                        | 28 (12-43)                 |                                 | 19 (8-28)                          |                                         | 0 (0-0)             |                          | 0 (0-0)                     | 0 (0-0)                          |
| 2006 | Swaziland            | 104 (73-137)              |                                | 68 (48-89)                        |                                        | 27 (12-41)                 |                                 | 18 (8-27)                          |                                         | 0 (0-0)             |                          | 0 (0-0)                     | 0 (0-0)                          |
| 2007 | Swaziland            | 102 (72-134)              |                                | 66 (46-87)                        |                                        | 27 (12-41)                 |                                 | 17 (7-26)                          |                                         | 0 (0-0)             |                          | 0 (0-0)                     | 0 (0-0)                          |
| 2008 | Swaziland            | 100 (70-131)              |                                | 63 (45-83)                        |                                        | 26 (11-41)                 |                                 | 17 (7-26)                          |                                         | 0 (0-0)             |                          | 0 (0-0)                     | 0 (0-0)                          |
| 2009 | Swaziland            | 15 (10-20)                |                                | 9 (7-12)                          |                                        | 4 (2-6)                    |                                 | 2 (1-4)                            |                                         | 0 (0-0)             |                          | 0 (0-0)                     | 0 (0-0)                          |
| 2010 | Swaziland            | 8 (5-10)                  |                                | 5 (3-8)                           |                                        | 2 (1-3)                    |                                 | 1 (0-2)                            |                                         | 0 (0-0)             |                          | 0 (0-0)                     | 0 (0-0)                          |
| 2011 | Swaziland            | 7 (5-9)                   |                                | 4 (3-5)                           |                                        | 2 (1-3)                    |                                 | 1 (0-2)                            |                                         | 0 (0-0)             |                          | 0 (0-0)                     | 0 (0-0)                          |
| 2012 | Swaziland            | 6 (4-8)                   |                                | 4 (3-5)                           |                                        | 2 (1-3)                    |                                 | 1 (0-2)                            |                                         | 0 (0-0)             |                          | 0 (0-0)                     | 0 (0-0)                          |
| 2013 | Swaziland            | 6 (4-7)                   |                                | 3 (2-4)                           |                                        | 1 (1-2)                    |                                 | 1 (0-1)                            |                                         | 0 (0-0)             |                          | 0 (0-0)                     | 0 (0-0)                          |
| 2014 | Swaziland            | 1 (1-1)                   |                                | 0 (0-1)                           |                                        | 0 (0-0)                    |                                 | 0 (0-0)                            |                                         | 0 (0-0)             |                          | 0 (0-0)                     | 0 (0-0)                          |
| 2015 | Swaziland            | 1 (1-1)                   | 0 (0-0)                        | 0 (0-1)                           | 0 (0-0)                                | 0 (0-0)                    | 0 (0-0)                         | 0 (0-0)                            | 0 (0-0)                                 | 0 (0-0)             | 0 (0-0)                  | 0 (0-0)                     | 0 (0-0)                          |
| 2000 | Sweden               | 0 (0-0)                   |                                | 0 (0-0)                           |                                        | 0 (0-0)                    |                                 | 0 (0-0)                            |                                         | 0 (0-0)             |                          | 0 (0-0)                     | 0 (0-0)                          |
| 2001 | Sweden               | 0 (0-0)                   |                                | 0 (0-0)                           |                                        | 0 (0-0)                    |                                 | 0 (0-0)                            |                                         | 0 (0-0)             |                          | 0 (0-0)                     | 0 (0-0)                          |
| 2002 | Sweden               | 0 (0-0)                   |                                | 0 (0-0)                           |                                        | 0 (0-0)                    |                                 | 0 (0-0)                            |                                         | 0 (0-0)             |                          | 0 (0-0)                     | 0 (0-0)                          |
| 2003 | Sweden               | 0 (0-0)                   |                                | 0 (0-0)                           |                                        | 0 (0-0)                    |                                 | 0 (0-0)                            |                                         | 0 (0-0)             |                          | 0 (0-0)                     | 0 (0-0)                          |
| 2004 | Sweden               | 0 (0-0)                   |                                | 0 (0-0)                           |                                        | 0 (0-0)                    |                                 | 0 (0-0)                            |                                         | 0 (0-0)             |                          | 0 (0-0)                     | 0 (0-0)                          |
| 2005 | Sweden               | 0 (0-0)                   |                                | 0 (0-0)                           |                                        | 0 (0-0)                    |                                 | 0 (0-0)                            |                                         | 0 (0-0)             |                          | 0 (0-0)                     | 0 (0-0)                          |
| 2006 | Sweden               | 0 (0-0)                   |                                | 0 (0-0)                           |                                        | 0 (0-0)                    |                                 | 0 (0-0)                            |                                         | 0 (0-0)             |                          | 0 (0-0)                     | 0 (0-0)                          |
| 2007 | Sweden               | 0 (0-0)                   |                                | 0 (0-0)                           |                                        | 0 (0-0)                    |                                 | 0 (0-0)                            |                                         | 0 (0-0)             |                          | 0 (0-0)                     | 0 (0-0)                          |
| 2008 | Sweden               | 0 (0-0)                   |                                | 0 (0-0)                           |                                        | 0 (0-0)                    |                                 | 0 (0-0)                            |                                         | 0 (0-0)             |                          | 0 (0-0)                     | 0 (0-0)                          |
| 2009 | Sweden               | 0 (0-0)                   |                                | 0 (0-0)                           |                                        | 0 (0-0)                    |                                 | 0 (0-0)                            |                                         | 0 (0-0)             |                          | 0 (0-0)                     | 0 (0-0)                          |
| 2010 | Sweden               | 0 (0-0)                   |                                | 0 (0-0)                           |                                        | 0 (0-0)                    |                                 | 0 (0-0)                            |                                         | 0 (0-0)             |                          | 0 (0-0)                     | 0 (0-0)                          |
| 2011 | Sweden               | 0 (0-0)                   |                                | 0 (0-0)                           |                                        | 0 (0-0)                    |                                 | 0 (0-0)                            |                                         | 0 (0-0)             |                          | 0 (0-0)                     | 0 (0-0)                          |
| 2012 | Sweden               | 0 (0-0)                   |                                | 0 (0-0)                           |                                        | 0 (0-0)                    |                                 | 0 (0-0)                            |                                         | 0 (0-0)             |                          | 0 (0-0)                     | 0 (0-0)                          |
| 2013 | Sweden               | 0 (0-0)                   |                                | 0 (0-0)                           |                                        | 0 (0-0)                    |                                 | 0 (0-0)                            |                                         | 0 (0-0)             |                          | 0 (0-0)                     | 0 (0-0)                          |
| 2014 | Sweden               | 0 (0-0)                   |                                | 0 (0-0)                           |                                        | 0 (0-0)                    |                                 | 0 (0-0)                            |                                         | 0 (0-0)             |                          | 0 (0-0)                     | 0 (0-0)                          |
| 2015 | Sweden               | 0 (0-0)                   | 0 (0-0)                        | 0 (0-0)                           | 0 (0-0)                                | 0 (0-0)                    | 0 (0-0)                         | 0 (0-0)                            | 0 (0-0)                                 | 0 (0-0)             | 0 (0-0)                  | 0 (0-0)                     | 0 (0-0)                          |
| 2000 | Switzerland          | 0 (0-0)                   |                                | 0 (0-0)                           |                                        | 0 (0-0)                    |                                 | 0 (0-0)                            |                                         | 0 (0-0)             |                          | 0 (0-0)                     | 0 (0-0)                          |
| 2001 | Switzerland          | 0 (0-0)                   |                                | 0 (0-0)                           |                                        | 0 (0-0)                    |                                 | 0 (0-0)                            |                                         | 0 (0-0)             |                          | 0 (0-0)                     | 0 (0-0)                          |
| 2002 | Switzerland          | 0 (0-0)                   |                                | 0 (0-0)                           |                                        | 0 (0-0)                    |                                 | 0 (0-0)                            |                                         | 0 (0-0)             |                          | 0 (0-0)                     | 0 (0-0)                          |
| 2003 | Switzerland          | 0 (0-0)                   |                                | 0 (0-0)                           |                                        | 0 (0-0)                    |                                 | 0 (0-0)                            |                                         | 0 (0-0)             |                          | 0 (0-0)                     | 0 (0-0)                          |
| 2004 | Switzerland          | 0 (0-0)                   |                                | 0 (0-0)                           |                                        | 0 (0-0)                    |                                 | 0 (0-0)                            |                                         | 0 (0-0)             |                          | 0 (0-0)                     | 0 (0-0)                          |
| 2005 | Switzerland          | 0 (0-0)                   |                                | 0 (0-0)                           |                                        | 0 (0-0)                    |                                 | 0 (0-0)                            |                                         | 0 (0-0)             |                          | 0 (0-0)                     | 0 (0-0)                          |
| 2006 | Switzerland          | 0 (0-0)                   |                                | 0 (0-0)                           |                                        | 0 (0-0)                    |                                 | 0 (0-0)                            |                                         | 0 (0-0)             |                          | 0 (0-0)                     | 0 (0-0)                          |
| 2007 | Switzerland          | 0 (0-0)                   |                                | 0 (0-0)                           |                                        | 0 (0-0)                    |                                 | 0 (0-0)                            |                                         | 0 (0-0)             |                          | 0 (0-0)                     | 0 (0-0)                          |
| 2008 | Switzerland          | 0 (0-0)                   |                                | 0 (0-0)                           |                                        | 0 (0-0)                    |                                 | 0 (0-0)                            |                                         | 0 (0-0)             |                          | 0 (0-0)                     | 0 (0-0)                          |
| 2009 | Switzerland          | 0 (0-0)                   |                                | 0 (0-0)                           |                                        | 0 (0-0)                    |                                 | 0 (0-0)                            |                                         | 0 (0-0)             |                          | 0 (0-0)                     | 0 (0-0)                          |
| 2010 | Switzerland          | 0 (0-0)                   |                                | 0 (0-0)                           |                                        | 0 (0-0)                    |                                 | 0 (0-0)                            |                                         | 0 (0-0)             |                          | 0 (0-0)                     | 0 (0-0)                          |
| 2011 | Switzerland          | 0 (0-0)                   |                                | 0 (0-0)                           |                                        | 0 (0-0)                    |                                 | 0 (0-0)                            |                                         | 0 (0-0)             |                          | 0 (0-0)                     | 0 (0-0)                          |
| 2012 | Switzerland          | 0 (0-0)                   |                                | 0 (0-0)                           |                                        | 0 (0-0)                    |                                 | 0 (0-0)                            |                                         | 0 (0-0)             |                          | 0 (0-0)                     | 0 (0-0)                          |
| 2013 | Switzerland          | 0 (0-0)                   |                                | 0 (0-0)                           |                                        | 0 (0-0)                    |                                 | 0 (0-0)                            |                                         | 0 (0-0)             |                          | 0 (0-0)                     | 0 (0-0)                          |
| 2014 | Switzerland          | 0 (0-0)                   |                                | 0 (0-0)                           |                                        | 0 (0-0)                    |                                 | 0 (0-0)                            |                                         | 0 (0-0)             |                          | 0 (0-0)                     | 0 (0-0)                          |
| 2015 | Switzerland          | 0 (0-0)                   | 0 (0-0)                        | 0 (0-0)                           | 0 (0-0)                                | 0 (0-0)                    | 0 (0-0)                         | 0 (0-0)                            | 0 (0-0)                                 | 0 (0-0)             | 0 (0-0)                  | 0 (0-0)                     | 0 (0-0)                          |
| 2000 | Syrian Arab Republic | 250 (176-329)             |                                | 11 (7-14)                         |                                        | 26 (4-46)                  |                                 | 1 (0-2)                            |                                         | 0 (0-0)             |                          | 0 (0-0)                     | 0 (0-0)                          |
| 2001 | Syrian Arab Republic | 41 (29-54)                |                                | 2 (1-2)                           |                                        | 8 (1-13)                   |                                 | 0 (0-1)                            |                                         | 0 (0-0)             |                          | 0 (0-0)                     | 0 (0-0)                          |
| 2002 | Syrian Arab Republic | 21 (15-28)                |                                | 1 (1-1)                           |                                        | 4 (1-7)                    |                                 | 0 (0-0)                            |                                         | 0 (0-0)             |                          | 0 (0-0)                     | 0 (0-0)                          |
| 2003 | Syrian Arab Republic | 19 (14-26)                |                                | 1 (1-1)                           |                                        | 4 (1-6)                    |                                 | 0 (0-0)                            |                                         | 0 (0-0)             |                          | 0 (0-0)                     | 0 (0-0)                          |
| 2004 | Syrian Arab Republic | 18 (13-24)                |                                | 1 (1-1)                           |                                        | 3 (1-6)                    |                                 | 0 (0-0)                            |                                         | 0 (0-0)             |                          | 0 (0-0)                     | 0 (0-0)                          |
| 2005 | Syrian Arab Republic | 17 (12-22)                |                                | 1 (0-1)                           |                                        | 3 (1-5)                    |                                 | 0 (0-0)                            |                                         | 0 (0-0)             |                          | 0 (0-0)                     | 0 (0-0)                          |
| 2006 | Syrian Arab Republic | 2 (1-2)                   |                                | 0 (0-0)                           |                                        | 0 (0-1)                    |                                 | 0 (0-0)                            |                                         | 0 (0-0)             |                          | 0 (0-0)                     | 0 (0-0)                          |
| 2007 | Syrian Arab Republic | 2 (1-2)                   |                                | 0 (0-0)                           |                                        | 0 (0-1)                    |                                 | 0 (0-0)                            |                                         | 0 (0-0)             |                          | 0 (0-0)                     | 0 (0-0)                          |
| 2008 | Syrian Arab Republic | 2 (1-2)                   |                                | 0 (0-0)                           |                                        | 0 (0-0)                    |                                 | 0 (0-0)                            |                                         | 0 (0-0)             |                          | 0 (0-0)                     | 0 (0-0)                          |
| 2009 | Syrian Arab Republic | 2 (1-2)                   |                                | 0 (0-0)                           |                                        | 0 (0-0)                    |                                 | 0 (0-0)                            |                                         | 0 (0-0)             |                          | 0 (0-0)                     | 0 (0-0)                          |
| 2010 | Syrian Arab Republic | 1 (1-2)                   |                                | 0 (0-0)                           |                                        | 0 (0-0)                    |                                 | 0 (0-0)                            |                                         | 0 (0-0)             |                          | 0 (0-0)                     | 0 (0-0)                          |
| 2011 | Syrian Arab Republic | 1 (1-2)                   |                                | 0 (0-0)                           |                                        | 0 (0-0)                    |                                 | 0 (0-0)                            |                                         | 0 (0-0)             |                          | 0 (0-0)                     | 0 (0-0)                          |
| 2012 | Syrian Arab Republic | 14 (10-19)                |                                | 1 (0-1)                           |                                        | 2 (1-3)                    |                                 | 0 (0-0)                            |                                         | 0 (0-0)             |                          | 0 (0-0)                     | 0 (0-0)                          |
| 2013 | Syrian Arab Republic | 12 (8-16)                 |                                | 1 (0-1)                           |                                        | 1 (1-2)                    |                                 | 0 (0-0)                            |                                         | 0 (0-0)             |                          | 0 (0-0)                     | 0 (0-0)                          |
| 2014 | Syrian Arab Republic | 10 (7-14)                 |                                | 0 (0-1)                           |                                        | 1 (1-2)                    |                                 | 0 (0-0)                            |                                         | 0 (0-0)             |                          | 0 (0-0)                     | 0 (0-0)                          |
| 2015 | Syrian Arab Republic | 11 (7-14)                 | 0 (0-0)                        | 0 (0-1)                           | 0 (0-0)                                | 1 (0-2)                    | 0 (0-0)                         | 0 (0-0)                            | 0 (0-0)                                 | 0 (0-0)             | 0 (0-0)                  | 0 (0-0)                     | 0 (0-0)                          |
| 2000 | Tajikistan           | 658 (463-864)             |                                | 75 (53-99)                        |                                        | 301 (105-475)              |                                 | 35 (12-54)                         |                                         | 1 (0-2)             |                          | 0 (0-0)                     | 0 (0-0)                          |
| 2001 | Tajikistan           | 595 (419-782)             |                                | 68 (48-90)                        |                                        | 268 (95-420)               |                                 | 31 (11-48)                         |                                         | 1 (0-2)             |                          | 0 (0-0)                     | 0 (0-0)                          |
| 2002 | Tajikistan           | 531 (374-698)             |                                | 62 (43-81)                        |                                        | 234 (85-365)               |                                 | 27 (10-42)                         |                                         | 1 (0-1)             |                          | 0 (0-0)                     | 0 (0-0)                          |
| 2003 | Tajikistan           | 473 (333-621)             |                                | 56 (39-73)                        |                                        | 204 (69-326)               |                                 | 24 (8-38)                          |                                         | 2 (1-3)             |                          | 0 (0-0)                     | 0 (0-0)                          |
| 2004 | Tajikistan           | 431 (303-566)             |                                | 51 (36-67)                        |                                        | 181 (63-289)               |                                 | 22 (7-34)                          |                                         | 1 (1-2)             |                          | 0 (0-0)                     | 0 (0-0)                          |
| 2005 | Tajikistan           | 402 (283-528)             |                                | 47 (33-62)                        |                                        | 165 (59-261)               |                                 | 20 (7-31)                          |                                         | 1 (0-2)             |                          | 0 (0-0)                     | 0 (0-0)                          |
| 2006 | Tajikistan           | 384 (270-504)             |                                | 45 (32-59)                        |                                        | 155 (55-245)               |                                 | 18 (7-29)                          |                                         | 1 (0-2)             |                          | 0 (0-0)                     | 0 (0-0)                          |
| 2007 | Tajikistan           | 377 (265-495)             |                                | 43 (31-57)                        |                                        | 149 (53-237)               |                                 | 17 (6-27)                          |                                         | 1 (0-2)             |                          | 0 (0-0)                     | 0 (0-0)                          |
| 2008 | Tajikistan           | 218 (154-287)             |                                | 24 (17-32)                        |                                        | 86 (31-136)                |                                 | 10 (3-15)                          |                                         | 1 (0-1)             |                          | 0 (0-0)                     | 0 (0-0)                          |
| 2009 | Tajikistan           | 29 (21-38)                |                                | 3 (2-4)                           |                                        | 11 (4-18)                  |                                 | 1 (0-2)                            |                                         | 0 (0-0)             |                          | 0 (0-0)                     | 0 (0-0)                          |
| 2010 | Tajikistan           | 30 (21-39)                |                                | 3 (2-4)                           |                                        | 11 (4-18)                  |                                 | 1 (0-2)                            |                                         | 0 (0-0)             |                          | 0 (0-0)                     | 0 (0-0)                          |
| 2011 | Tajikistan           | 28 (20-37)                |                                | 3 (2-4)                           |                                        | 11 (4-17)                  |                                 | 1 (0-2)                            |                                         | 0 (0-0)             |                          | 0 (0-0)                     | 0 (0-0)                          |
| 2012 | Tajikistan           | 30 (21-39)                |                                | 3 (2-4)                           |                                        | 11 (4-18)                  |                                 | 1 (0-2)                            |                                         | 0 (0-0)             |                          | 0 (0-0)                     | 0 (0-0)                          |
| 2013 | Tajikistan           | 4 (3-5)                   |                                | 0 (0-0)                           |                                        | 1 (1-2)                    |                                 | 0 (0-0)                            |                                         | 0 (0-0)             |                          | 0 (0-0)                     | 0 (0-0)                          |
| 2014 | Tajikistan           | 4 (3-5)                   |                                | 0 (0-0)                           |                                        | 1 (1-2)                    |                                 | 0 (0-0)                            |                                         | 0 (0-0)             |                          | 0 (0-0)                     | 0 (0-0)                          |
| 2015 | Tajikistan           | 4 (3-5)                   | 0 (0-0)                        | 0 (0-0)                           | 0 (0-0)                                | 1 (1-2)                    | 0 (0-0)                         | 0 (0-0)                            | 0 (0-0)                                 | 0 (0-0)             | 0 (0-0)                  | 0 (0-0)                     | 0 (0-0)                          |
| 2000 | Thailand             | 323 (227-424)             |                                | 7 (5-9)                           |                                        | 75 (17-123)                |                                 | 2 (0-3)                            |                                         | 1 (0-1)             |                          | 0 (0-0)                     | 0 (0-0)                          |
| 2001 | Thailand             | 297 (209-390)             |                                | 7 (5-9)                           |                                        | 70 (16-114)                |                                 | 2 (0-3)                            |                                         | 1 (0-1)             |                          | 0 (0-0)                     | 0 (0-0)                          |
| 2002 | Thailand             | 277 (195-363)             |                                | 6 (4-8)                           |                                        | 65 (15-107)                |                                 | 1 (0-2)                            |                                         | 1 (0-1)             |                          | 0 (0-0)                     | 0 (0-0)                          |
| 2003 | Thailand             | 258 (181-339)             |                                | 6 (4-8)                           |                                        | 61 (14-101)                |                                 | 1 (0-2)                            |                                         | 0 (0-1)             |                          | 0 (0-0)                     | 0 (0-0)                          |
| 2004 | Thailand             | 239 (168-314)             |                                | 5 (4-7)                           |                                        | 57 (13-94)                 |                                 | 1 (0-2)                            |                                         | 0 (0-1)             |                          | 0 (0-0)                     | 0 (0-0)                          |
| 2005 | Thailand             | 218 (154-287)             |                                | 5 (3-7)                           |                                        | 53 (12-86)                 |                                 | 1 (0-2)                            |                                         | 0 (0-1)             |                          | 0 (0-0)                     | 0 (0-0)                          |
| 2006 | Thailand             | 200 (141-263)             |                                | 5 (3-6)                           |                                        | 49 (11-80)                 |                                 | 1 (0-2)                            |                                         | 0 (0-1)             |                          | 0 (0-0)                     | 0 (0-0)                          |

Hib = *Haemophilus influenzae* type b; npnm = non-pneumonia, non-meningitis; HIV = deaths only in HIV-infected children; Uncertainty range provided in parentheses.

| Year | Country                                   | Hib pneumonia deaths (UR) | Hib pneumonia deaths, HIV (UR) | Hib pneumonia mortality rate (UR) | Hib pneumonia mortality rate, HIV (UR) | Hib meningitis deaths (UR) | Hib meningitis deaths, HIV (UR) | Hib meningitis mortality rate (UR) | Hib meningitis mortality rate, HIV (UR) | Hib NPNM deaths (UR) | Hib NPNM deaths, HIV (UR) | Hib NPNM mortality rate (UR) | Hib NPNM mortality rate, HIV (UR) |
|------|-------------------------------------------|---------------------------|--------------------------------|-----------------------------------|----------------------------------------|----------------------------|---------------------------------|------------------------------------|-----------------------------------------|----------------------|---------------------------|------------------------------|-----------------------------------|
| 2007 | Thailand                                  | 184 (129-242)             |                                | 4 (3-6)                           |                                        | 45 (11-74)                 |                                 | 1 (0-2)                            |                                         | 0 (0-1)              |                           | 0 (0-0)                      |                                   |
| 2008 | Thailand                                  | 166 (117-219)             |                                | 4 (3-5)                           |                                        | 41 (10-67)                 |                                 | 1 (0-2)                            |                                         | 0 (0-1)              |                           | 0 (0-0)                      |                                   |
| 2009 | Thailand                                  | 157 (110-206)             |                                | 4 (3-5)                           |                                        | 39 (9-63)                  |                                 | 1 (0-2)                            |                                         | 0 (0-1)              |                           | 0 (0-0)                      |                                   |
| 2010 | Thailand                                  | 149 (105-195)             |                                | 4 (3-5)                           |                                        | 37 (8-60)                  |                                 | 1 (0-2)                            |                                         | 0 (0-0)              |                           | 0 (0-0)                      |                                   |
| 2011 | Thailand                                  | 139 (98-183)              |                                | 4 (3-5)                           |                                        | 34 (8-58)                  |                                 | 1 (0-1)                            |                                         | 0 (0-0)              |                           | 0 (0-0)                      |                                   |
| 2012 | Thailand                                  | 131 (92-173)              |                                | 3 (2-4)                           |                                        | 32 (7-52)                  |                                 | 1 (0-1)                            |                                         | 0 (0-0)              |                           | 0 (0-0)                      |                                   |
| 2013 | Thailand                                  | 124 (87-162)              |                                | 3 (2-4)                           |                                        | 30 (7-45)                  |                                 | 1 (0-1)                            |                                         | 0 (0-0)              |                           | 0 (0-0)                      |                                   |
| 2014 | Thailand                                  | 118 (83-155)              | 0 (0-0)                        | 3 (2-4)                           |                                        | 28 (7-46)                  | 0 (0-0)                         | 1 (0-1)                            |                                         | 0 (0-0)              |                           | 0 (0-0)                      |                                   |
| 2015 | Thailand                                  | 113 (80-149)              | 0 (0-0)                        | 3 (2-4)                           | 0 (0-0)                                | 27 (6-43)                  | 0 (0-0)                         | 1 (0-1)                            | 0 (0-0)                                 | 0 (0-0)              |                           | 0 (0-0)                      | 0 (0-0)                           |
| 2000 | The former Yugoslav Republic of Macedonia | 6 (4-8)                   |                                | 4 (3-6)                           |                                        | 1 (0-2)                    |                                 | 1 (0-1)                            |                                         | 0 (0-0)              |                           | 0 (0-0)                      |                                   |
| 2001 | The former Yugoslav Republic of Macedonia | 7 (5-9)                   |                                | 5 (3-7)                           |                                        | 2 (1-4)                    |                                 | 2 (0-3)                            |                                         | 0 (0-0)              |                           | 0 (0-0)                      |                                   |
| 2002 | The former Yugoslav Republic of Macedonia | 5 (4-7)                   |                                | 4 (3-5)                           |                                        | 2 (1-4)                    |                                 | 1 (0-3)                            |                                         | 0 (0-0)              |                           | 0 (0-0)                      |                                   |
| 2003 | The former Yugoslav Republic of Macedonia | 5 (4-7)                   |                                | 4 (3-5)                           |                                        | 2 (1-3)                    |                                 | 1 (0-3)                            |                                         | 0 (0-0)              |                           | 0 (0-0)                      |                                   |
| 2004 | The former Yugoslav Republic of Macedonia | 4 (3-6)                   |                                | 4 (3-5)                           |                                        | 2 (1-3)                    |                                 | 1 (0-3)                            |                                         | 0 (0-0)              |                           | 0 (0-0)                      |                                   |
| 2005 | The former Yugoslav Republic of Macedonia | 4 (3-5)                   |                                | 3 (2-4)                           |                                        | 1 (0-1)                    |                                 | 0 (0-1)                            |                                         | 0 (0-0)              |                           | 0 (0-0)                      |                                   |
| 2006 | The former Yugoslav Republic of Macedonia | 4 (3-5)                   |                                | 3 (2-4)                           |                                        | 1 (0-2)                    |                                 | 1 (0-1)                            |                                         | 0 (0-0)              |                           | 0 (0-0)                      |                                   |
| 2007 | The former Yugoslav Republic of Macedonia | 3 (2-4)                   |                                | 2 (2-3)                           |                                        | 1 (1-6)                    |                                 | 3 (1-5)                            |                                         | 0 (0-0)              |                           | 0 (0-0)                      |                                   |
| 2008 | The former Yugoslav Republic of Macedonia | 1 (1-2)                   |                                | 1 (1-2)                           |                                        | 1 (0-2)                    |                                 | 1 (0-2)                            |                                         | 0 (0-0)              |                           | 0 (0-0)                      |                                   |
| 2009 | The former Yugoslav Republic of Macedonia | 0 (0-0)                   |                                | 0 (0-0)                           |                                        | 0 (0-0)                    |                                 | 0 (0-0)                            |                                         | 0 (0-0)              |                           | 0 (0-0)                      |                                   |
| 2010 | The former Yugoslav Republic of Macedonia | 0 (0-0)                   |                                | 0 (0-0)                           |                                        | 0 (0-0)                    |                                 | 0 (0-0)                            |                                         | 0 (0-0)              |                           | 0 (0-0)                      |                                   |
| 2011 | The former Yugoslav Republic of Macedonia | 0 (0-0)                   |                                | 0 (0-0)                           |                                        | 0 (0-0)                    |                                 | 0 (0-0)                            |                                         | 0 (0-0)              |                           | 0 (0-0)                      |                                   |
| 2012 | The former Yugoslav Republic of Macedonia | 0 (0-0)                   |                                | 0 (0-0)                           |                                        | 0 (0-0)                    |                                 | 0 (0-0)                            |                                         | 0 (0-0)              |                           | 0 (0-0)                      |                                   |
| 2013 | The former Yugoslav Republic of Macedonia | 0 (0-0)                   |                                | 0 (0-0)                           |                                        | 0 (0-0)                    |                                 | 0 (0-0)                            |                                         | 0 (0-0)              |                           | 0 (0-0)                      |                                   |
| 2014 | The former Yugoslav Republic of Macedonia | 0 (0-0)                   |                                | 0 (0-0)                           |                                        | 0 (0-0)                    |                                 | 0 (0-0)                            |                                         | 0 (0-0)              |                           | 0 (0-0)                      |                                   |
| 2015 | The former Yugoslav Republic of Macedonia | 0 (0-0)                   | 0 (0-0)                        | 0 (0-0)                           | 0 (0-0)                                | 0 (0-0)                    | 0 (0-0)                         | 0 (0-0)                            | 0 (0-0)                                 | 0 (0-0)              | 0 (0-0)                   | 0 (0-0)                      | 0 (0-0)                           |
| 2000 | Timor-Leste                               | 156 (110-205)             |                                | 91 (64-120)                       |                                        | 53 (19-83)                 |                                 | 31 (11-49)                         |                                         | 0 (0-0)              |                           | 0 (0-0)                      |                                   |
| 2001 | Timor-Leste                               | 144 (101-189)             |                                | 84 (59-110)                       |                                        | 51 (19-80)                 |                                 | 30 (11-47)                         |                                         | 0 (0-0)              |                           | 0 (0-0)                      |                                   |
| 2002 | Timor-Leste                               | 133 (93-174)              |                                | 77 (54-102)                       |                                        | 49 (18-76)                 |                                 | 28 (10-44)                         |                                         | 0 (0-0)              |                           | 0 (0-0)                      |                                   |
| 2003 | Timor-Leste                               | 122 (86-160)              |                                | 72 (50-94)                        |                                        | 45 (17-70)                 |                                 | 26 (10-41)                         |                                         | 0 (0-0)              |                           | 0 (0-0)                      |                                   |
| 2004 | Timor-Leste                               | 111 (78-146)              |                                | 66 (46-87)                        |                                        | 40 (15-61)                 |                                 | 24 (9-37)                          |                                         | 0 (0-0)              |                           | 0 (0-0)                      |                                   |
| 2005 | Timor-Leste                               | 100 (70-132)              |                                | 61 (43-80)                        |                                        | 34 (13-52)                 |                                 | 21 (8-32)                          |                                         | 0 (0-0)              |                           | 0 (0-0)                      |                                   |
| 2006 | Timor-Leste                               | 90 (63-118)               |                                | 57 (40-75)                        |                                        | 28 (11-44)                 |                                 | 18 (7-28)                          |                                         | 0 (0-0)              |                           | 0 (0-0)                      |                                   |
| 2007 | Timor-Leste                               | 80 (56-105)               |                                | 53 (37-70)                        |                                        | 24 (9-37)                  |                                 | 16 (6-25)                          |                                         | 0 (0-0)              |                           | 0 (0-0)                      |                                   |
| 2008 | Timor-Leste                               | 73 (51-96)                |                                | 49 (35-65)                        |                                        | 20 (8-32)                  |                                 | 14 (5-22)                          |                                         | 0 (0-0)              |                           | 0 (0-0)                      |                                   |
| 2009 | Timor-Leste                               | 68 (48-90)                |                                | 47 (33-61)                        |                                        | 19 (7-29)                  |                                 | 13 (5-20)                          |                                         | 0 (0-0)              |                           | 0 (0-0)                      |                                   |
| 2010 | Timor-Leste                               | 69 (49-91)                |                                | 46 (32-61)                        |                                        | 18 (7-29)                  |                                 | 12 (5-19)                          |                                         | 0 (0-0)              |                           | 0 (0-0)                      |                                   |
| 2011 | Timor-Leste                               | 72 (51-95)                |                                | 48 (34-63)                        |                                        | 19 (7-29)                  |                                 | 13 (5-20)                          |                                         | 0 (0-0)              |                           | 0 (0-0)                      |                                   |
| 2012 | Timor-Leste                               | 79 (56-104)               |                                | 49 (35-65)                        |                                        | 21 (8-32)                  |                                 | 13 (5-20)                          |                                         | 0 (0-0)              |                           | 0 (0-0)                      |                                   |
| 2013 | Timor-Leste                               | 14 (10-19)                |                                | 8 (6-11)                          |                                        | 4 (1-6)                    |                                 | 2 (1-3)                            |                                         | 0 (0-0)              |                           | 0 (0-0)                      |                                   |
| 2014 | Timor-Leste                               | 3 (7-12)                  |                                | 5 (3-6)                           |                                        | 2 (1-4)                    |                                 | 1 (1-2)                            |                                         | 0 (0-0)              |                           | 0 (0-0)                      |                                   |
| 2015 | Timor-Leste                               | 10 (7-13)                 | 0 (0-0)                        | 5 (3-8)                           | 0 (0-0)                                | 3 (1-4)                    | 0 (0-0)                         | 1 (1-2)                            | 0 (0-0)                                 | 0 (0-0)              | 0 (0-0)                   | 0 (0-0)                      | 0 (0-0)                           |
| 2000 | Togo                                      | 364 (256-478)             |                                | 45 (32-60)                        |                                        | 161 (48-265)               |                                 | 20 (6-33)                          |                                         | 1 (0-1)              |                           | 0 (0-0)                      |                                   |
| 2001 | Togo                                      | 370 (260-486)             |                                | 45 (32-59)                        |                                        | 165 (48-272)               |                                 | 20 (6-33)                          |                                         | 1 (0-1)              |                           | 0 (0-0)                      |                                   |
| 2002 | Togo                                      | 373 (263-491)             |                                | 44 (31-58)                        |                                        | 168 (49-277)               |                                 | 20 (6-33)                          |                                         | 1 (0-1)              |                           | 0 (0-0)                      |                                   |
| 2003 | Togo                                      | 374 (263-491)             |                                | 43 (30-56)                        |                                        | 169 (49-279)               |                                 | 19 (6-32)                          |                                         | 1 (0-1)              |                           | 0 (0-0)                      |                                   |
| 2004 | Togo                                      | 373 (262-490)             |                                | 42 (29-55)                        |                                        | 170 (49-280)               |                                 | 19 (5-31)                          |                                         | 1 (0-1)              |                           | 0 (0-0)                      |                                   |
| 2005 | Togo                                      | 370 (260-486)             |                                | 40 (28-53)                        |                                        | 169 (48-279)               |                                 | 18 (5-30)                          |                                         | 1 (0-1)              |                           | 0 (0-0)                      |                                   |
| 2006 | Togo                                      | 367 (258-482)             |                                | 39 (27-51)                        |                                        | 167 (47-277)               |                                 | 18 (5-29)                          |                                         | 1 (0-1)              |                           | 0 (0-0)                      |                                   |
| 2007 | Togo                                      | 367 (258-483)             |                                | 38 (26-49)                        |                                        | 167 (48-276)               |                                 | 17 (5-28)                          |                                         | 1 (0-1)              |                           | 0 (0-0)                      |                                   |
| 2008 | Togo                                      | 318 (224-418)             |                                | 32 (22-42)                        |                                        | 144 (42-238)               |                                 | 14 (4-24)                          |                                         | 1 (0-1)              |                           | 0 (0-0)                      |                                   |
| 2009 | Togo                                      | 40 (25-52)                |                                | 4 (3-5)                           |                                        | 18 (5-30)                  |                                 | 2 (1-3)                            |                                         | 0 (0-0)              |                           | 0 (0-0)                      |                                   |
| 2010 | Togo                                      | 39 (27-51)                |                                | 4 (3-5)                           |                                        | 17 (5-28)                  |                                 | 2 (0-3)                            |                                         | 0 (0-0)              |                           | 0 (0-0)                      |                                   |
| 2011 | Togo                                      | 40 (28-53)                |                                | 4 (3-5)                           |                                        | 18 (6-29)                  |                                 | 2 (1-3)                            |                                         | 0 (0-0)              |                           | 0 (0-0)                      |                                   |
| 2012 | Togo                                      | 44 (31-57)                |                                | 4 (3-5)                           |                                        | 19 (6-31)                  |                                 | 2 (1-3)                            |                                         | 0 (0-0)              |                           | 0 (0-0)                      |                                   |
| 2013 | Togo                                      | 5 (3-6)                   |                                | 0 (0-1)                           |                                        | 2 (1-3)                    |                                 | 0 (0-0)                            |                                         | 0 (0-0)              |                           | 0 (0-0)                      |                                   |
| 2014 | Togo                                      | 5 (4-7)                   |                                | 0 (0-1)                           |                                        | 2 (1-4)                    |                                 | 0 (0-0)                            |                                         | 0 (0-0)              |                           | 0 (0-0)                      |                                   |
| 2015 | Togo                                      | 5 (4-7)                   | 0 (0-0)                        | 0 (0-1)                           | 0 (0-0)                                | 2 (1-4)                    | 0 (0-0)                         | 0 (0-0)                            | 0 (0-0)                                 | 0 (0-0)              | 0 (0-0)                   | 0 (0-0)                      | 0 (0-0)                           |
| 2000 | Tonga                                     | 1 (1-1)                   |                                | 7 (5-9)                           |                                        | 0 (0-0)                    |                                 | 3 (1-4)                            |                                         | 0 (0-0)              |                           | 0 (0-0)                      |                                   |
| 2001 | Tonga                                     | 1 (1-1)                   |                                | 7 (5-9)                           |                                        | 0 (0-0)                    |                                 | 2 (1-4)                            |                                         | 0 (0-0)              |                           | 0 (0-0)                      |                                   |
| 2002 | Tonga                                     | 1 (1-1)                   |                                | 7 (5-9)                           |                                        | 0 (0-0)                    |                                 | 2 (1-3)                            |                                         | 0 (0-0)              |                           | 0 (0-0)                      |                                   |
| 2003 | Tonga                                     | 1 (1-1)                   |                                | 6 (5-8)                           |                                        | 0 (0-0)                    |                                 | 2 (1-3)                            |                                         | 0 (0-0)              |                           | 0 (0-0)                      |                                   |
| 2004 | Tonga                                     | 1 (1-1)                   |                                | 7 (5-9)                           |                                        | 0 (0-0)                    |                                 | 2 (1-3)                            |                                         | 0 (0-0)              |                           | 0 (0-0)                      |                                   |
| 2005 | Tonga                                     | 0 (0-0)                   |                                | 1 (1-2)                           |                                        | 0 (0-0)                    |                                 | 1 (0-1)                            |                                         | 0 (0-0)              |                           | 0 (0-0)                      |                                   |
| 2006 | Tonga                                     | 0 (0-0)                   |                                | 1 (0-1)                           |                                        | 0 (0-0)                    |                                 | 1 (0-1)                            |                                         | 0 (0-0)              |                           | 0 (0-0)                      |                                   |
| 2007 | Tonga                                     | 0 (0-0)                   |                                | 1 (0-1)                           |                                        | 0 (0-0)                    |                                 | 0 (0-1)                            |                                         | 0 (0-0)              |                           | 0 (0-0)                      |                                   |
| 2008 | Tonga                                     | 0 (0-0)                   |                                | 1 (0-1)                           |                                        | 0 (0-0)                    |                                 | 0 (0-1)                            |                                         | 0 (0-0)              |                           | 0 (0-0)                      |                                   |
| 2009 | Tonga                                     | 0 (0-0)                   |                                | 1 (1-1)                           |                                        | 0 (0-0)                    |                                 | 1 (0-1)                            |                                         | 0 (0-0)              |                           | 0 (0-0)                      |                                   |
| 2010 | Tonga                                     | 0 (0-0)                   |                                | 0 (0-0)                           |                                        | 0 (0-0)                    |                                 | 0 (0-0)                            |                                         | 0 (0-0)              |                           | 0 (0-0)                      |                                   |
| 2011 | Tonga                                     | 0 (0-0)                   |                                | 0 (0-0)                           |                                        | 0 (0-0)                    |                                 | 0 (0-0)                            |                                         | 0 (0-0)              |                           | 0 (0-0)                      |                                   |
| 2012 | Tonga                                     | 0 (0-0)                   |                                | 0 (0-0)                           |                                        | 0 (0-0)                    |                                 | 0 (0-0)                            |                                         | 0 (0-0)              |                           | 0 (0-0)                      |                                   |
| 2013 | Tonga                                     | 0 (0-0)                   |                                | 0 (0-0)                           |                                        | 0 (0-0)                    |                                 | 0 (0-0)                            |                                         | 0 (0-0)              |                           | 0 (0-0)                      |                                   |
| 2014 | Tonga                                     | 0 (0-0)                   |                                | 0 (0-0)                           |                                        | 0 (0-0)                    |                                 | 0 (0-0)                            |                                         | 0 (0-0)              |                           | 0 (0-0)                      |                                   |
| 2015 | Tonga                                     | 0 (0-0)                   | 0 (0-0)                        | 0 (0-0)                           | 0 (0-0)                                | 0 (0-0)                    | 0 (0-0)                         | 0 (0-0)                            | 0 (0-0)                                 | 0 (0-0)              | 0 (0-0)                   | 0 (0-0)                      | 0 (0-0)                           |
| 2000 | Trinidad and Tobago                       | 0 (0-0)                   |                                | 0 (0-0)                           |                                        | 0 (0-1)                    |                                 | 0 (0-1)                            |                                         | 0 (0-0)              |                           | 0 (0-0)                      |                                   |
| 2001 | Trinidad and Tobago                       | 0 (0-0)                   |                                | 0 (0-0)                           |                                        | 0 (0-0)                    |                                 | 0 (0-0)                            |                                         | 0 (0-0)              |                           | 0 (0-0)                      |                                   |
| 2002 | Trinidad and Tobago                       | 0 (0-1)                   |                                | 1 (0-1)                           |                                        | 0 (0-1)                    |                                 | 0 (0-1)                            |                                         | 0 (0-0)              |                           | 0 (0-0)                      |                                   |
| 2003 | Trinidad and Tobago                       | 0 (0-0)                   |                                | 0 (0-0)                           |                                        | 0 (0-0)                    |                                 | 0 (0-0)                            |                                         | 0 (0-0)              |                           | 0 (0-0)                      |                                   |
| 2004 | Trinidad and Tobago                       | 0 (0-0)                   |                                | 0 (0-0)                           |                                        | 0 (0-0)                    |                                 | 0 (0-0)                            |                                         | 0 (0-0)              |                           | 0 (0-0)                      |                                   |
| 2005 | Trinidad and Tobago                       | 0 (0-0)                   |                                | 0 (0-0)                           |                                        | 0 (0-0)                    |                                 | 0 (0-0)                            |                                         | 0 (0-0)              |                           | 0 (0-0)                      |                                   |
| 2006 | Trinidad and Tobago                       | 0 (0-0)                   |                                | 0 (0-0)                           |                                        | 0 (0-0)                    |                                 | 0 (0-0)                            |                                         | 0 (0-0)              |                           | 0 (0-0)                      |                                   |
| 2007 | Trinidad and Tobago                       | 0 (0-0)                   |                                | 0 (0-0)                           |                                        | 0 (0-0)                    |                                 | 0 (0-0)                            |                                         | 0 (0-0)              |                           | 0 (0-0)                      |                                   |
| 2008 | Trinidad and Tobago                       | 0 (0-0)                   |                                | 0 (0-0)                           |                                        | 0 (0-0)                    |                                 | 0 (0-0)                            |                                         | 0 (0-0)              |                           | 0 (0-0)                      |                                   |
| 2009 | Trinidad and Tobago                       | 0 (0-0)                   |                                | 0 (0-0)                           |                                        | 0 (0-0)                    |                                 | 0 (0-0)                            |                                         | 0 (0-0)              |                           | 0 (0-0)                      |                                   |
| 2010 | Trinidad and Tobago                       | 0 (0-0)                   |                                | 0 (0-0)                           |                                        | 0 (0-0)                    |                                 | 0 (0-0)                            |                                         | 0 (0-0)              |                           | 0 (0-0)                      |                                   |
| 2011 | Trinidad and Tobago                       | 0 (0-0)                   |                                | 0 (0-0)                           |                                        | 0 (0-0)                    |                                 | 0 (0-0)                            |                                         | 0 (0-0)              |                           | 0 (0-0)                      |                                   |
| 2012 | Trinidad and Tobago                       | 0 (0-0)                   |                                | 0 (0-0)                           |                                        | 0 (0-0)                    |                                 | 0 (0-0)                            |                                         | 0 (0-0)              |                           | 0 (0-0)                      |                                   |
| 2013 | Trinidad and Tobago                       | 0 (0-0)                   |                                | 0 (0-0)                           |                                        | 0 (0-0)                    |                                 | 0 (0-0)                            |                                         | 0 (0-0)              |                           | 0 (0-0)                      |                                   |
| 2014 | Trinidad and Tobago                       | 0 (0-0)                   |                                | 0 (0-0)                           |                                        | 0 (0-0)                    |                                 | 0 (0-0)                            |                                         | 0 (0-0)              |                           | 0 (0-0)                      |                                   |
| 2015 | Trinidad and Tobago                       | 0 (0-0)                   | 0 (0-0)                        | 0 (0-0)                           | 0 (0-0)                                | 0 (0-0)                    | 0 (0-0)                         | 0 (0-0)                            | 0 (0-0)                                 | 0 (0-0)              | 0 (0-0)                   | 0 (0-0)                      | 0 (0-0)                           |

Hib = *Haemophilus influenzae* type b; npnm = non-pneumonia, non-meningitis; HIV = deaths only in HIV-infected children; Uncertainty range provided in parentheses.



| Year | Country             | Hib pneumonia deaths (UR) | Hib pneumonia deaths, HIV (UR) | Hib pneumonia mortality rate (UR) | Hib pneumonia mortality rate, HIV (UR) | Hib meningitis deaths (UR) | Hib meningitis deaths, HIV (UR) | Hib meningitis mortality rate (UR) | Hib meningitis mortality rate, HIV (UR) | Hib NPMN deaths (UR) | Hib NPMN deaths, HIV (UR) | Hib NPMN mortality rate (UR) | Hib NPMN mortality rate, HIV (UR) |
|------|---------------------|---------------------------|--------------------------------|-----------------------------------|----------------------------------------|----------------------------|---------------------------------|------------------------------------|-----------------------------------------|----------------------|---------------------------|------------------------------|-----------------------------------|
| 2015 | Trinidad and Tobago | 0 (0-0)                   | 0 (0-0)                        | 0 (0-0)                           | 0 (0-0)                                | 0 (0-0)                    | 0 (0-0)                         | 0 (0-0)                            | 0 (0-0)                                 | 0 (0-0)              | 0 (0-0)                   | 0 (0-0)                      | 0 (0-0)                           |
| 2000 | Tunisia             | 101 (71-133)              |                                | 12 (9-16)                         |                                        | 13 (4-21)                  |                                 | 2 (0-3)                            |                                         | 0 (0-0)              |                           | 0 (0-0)                      | 0 (0-0)                           |
| 2001 | Tunisia             | 90 (64-119)               |                                | 11 (8-15)                         |                                        | 11 (1-20)                  |                                 | 1 (0-2)                            |                                         | 0 (0-0)              |                           | 0 (0-0)                      | 0 (0-0)                           |
| 2002 | Tunisia             | 82 (57-107)               |                                | 10 (7-13)                         |                                        | 10 (1-18)                  |                                 | 1 (0-2)                            |                                         | 0 (0-0)              |                           | 0 (0-0)                      | 0 (0-0)                           |
| 2003 | Tunisia             | 12 (9-16)                 |                                | 2 (1-2)                           |                                        | 3 (0-5)                    |                                 | 0 (0-1)                            |                                         | 0 (0-0)              |                           | 0 (0-0)                      | 0 (0-0)                           |
| 2004 | Tunisia             | 5 (4-7)                   |                                | 1 (0-1)                           |                                        | 1 (0-2)                    |                                 | 0 (0-0)                            |                                         | 0 (0-0)              |                           | 0 (0-0)                      | 0 (0-0)                           |
| 2005 | Tunisia             | 7 (5-9)                   |                                | 1 (1-1)                           |                                        | 2 (0-3)                    |                                 | 0 (0-0)                            |                                         | 0 (0-0)              |                           | 0 (0-0)                      | 0 (0-0)                           |
| 2006 | Tunisia             | 57 (40-74)                |                                | 7 (5-9)                           |                                        | 7 (1-13)                   |                                 | 1 (0-2)                            |                                         | 0 (0-0)              |                           | 0 (0-0)                      | 0 (0-0)                           |
| 2007 | Tunisia             | 52 (37-69)                |                                | 7 (5-9)                           |                                        | 7 (1-12)                   |                                 | 1 (0-1)                            |                                         | 0 (0-0)              |                           | 0 (0-0)                      | 0 (0-0)                           |
| 2008 | Tunisia             | 49 (34-64)                |                                | 6 (4-8)                           |                                        | 6 (1-11)                   |                                 | 0 (0-0)                            |                                         | 0 (0-0)              |                           | 0 (0-0)                      | 0 (0-0)                           |
| 2009 | Tunisia             | 46 (32-61)                |                                | 6 (4-7)                           |                                        | 6 (1-11)                   |                                 | 1 (0-1)                            |                                         | 0 (0-0)              |                           | 0 (0-0)                      | 0 (0-0)                           |
| 2010 | Tunisia             | 43 (30-57)                |                                | 5 (4-7)                           |                                        | 6 (1-10)                   |                                 | 1 (0-1)                            |                                         | 0 (0-0)              |                           | 0 (0-0)                      | 0 (0-0)                           |
| 2011 | Tunisia             | 26 (15-34)                |                                | 3 (2-4)                           |                                        | 5 (1-8)                    |                                 | 1 (0-1)                            |                                         | 0 (0-0)              |                           | 0 (0-0)                      | 0 (0-0)                           |
| 2012 | Tunisia             | 3 (2-4)                   |                                | 0 (0-0)                           |                                        | 1 (0-1)                    |                                 | 0 (0-0)                            |                                         | 0 (0-0)              |                           | 0 (0-0)                      | 0 (0-0)                           |
| 2013 | Tunisia             | 3 (2-4)                   |                                | 0 (0-0)                           |                                        | 1 (0-1)                    |                                 | 0 (0-0)                            |                                         | 0 (0-0)              |                           | 0 (0-0)                      | 0 (0-0)                           |
| 2014 | Tunisia             | 3 (2-4)                   |                                | 0 (0-0)                           |                                        | 1 (0-1)                    |                                 | 0 (0-0)                            |                                         | 0 (0-0)              |                           | 0 (0-0)                      | 0 (0-0)                           |
| 2015 | Tunisia             | 3 (2-3)                   | 0 (0-0)                        | 0 (0-0)                           | 0 (0-0)                                | 1 (0-1)                    | 0 (0-0)                         | 0 (0-0)                            | 0 (0-0)                                 | 0 (0-0)              | 0 (0-0)                   | 0 (0-0)                      | 0 (0-0)                           |
| 2000 | Turkey              | 678 (477-891)             |                                | 10 (7-14)                         |                                        | 126 (70-198)               |                                 | 2 (1-3)                            |                                         | 1 (1-2)              |                           | 0 (0-0)                      | 0 (0-0)                           |
| 2001 | Turkey              | 601 (423-790)             |                                | 9 (6-12)                          |                                        | 114 (64-179)               |                                 | 2 (1-3)                            |                                         | 1 (1-1)              |                           | 0 (0-0)                      | 0 (0-0)                           |
| 2002 | Turkey              | 525 (369-689)             |                                | 8 (6-10)                          |                                        | 101 (58-161)               |                                 | 2 (1-2)                            |                                         | 1 (0-1)              |                           | 0 (0-0)                      | 0 (0-0)                           |
| 2003 | Turkey              | 463 (326-608)             |                                | 7 (5-9)                           |                                        | 89 (53-146)                |                                 | 1 (1-2)                            |                                         | 1 (0-1)              |                           | 0 (0-0)                      | 0 (0-0)                           |
| 2004 | Turkey              | 410 (288-538)             |                                | 6 (4-8)                           |                                        | 75 (30-100)                |                                 | 1 (0-2)                            |                                         | 1 (0-1)              |                           | 0 (0-0)                      | 0 (0-0)                           |
| 2005 | Turkey              | 366 (257-480)             |                                | 6 (4-7)                           |                                        | 63 (28-92)                 |                                 | 1 (0-1)                            |                                         | 1 (0-1)              |                           | 0 (0-0)                      | 0 (0-0)                           |
| 2006 | Turkey              | 325 (228-428)             |                                | 5 (4-7)                           |                                        | 53 (25-84)                 |                                 | 1 (0-1)                            |                                         | 0 (0-1)              |                           | 0 (0-0)                      | 0 (0-0)                           |
| 2007 | Turkey              | 74 (52-98)                |                                | 1 (1-2)                           |                                        | 13 (6-21)                  |                                 | 0 (0-0)                            |                                         | 0 (0-0)              |                           | 0 (0-0)                      | 0 (0-0)                           |
| 2008 | Turkey              | 23 (15-30)                |                                | 0 (0-0)                           |                                        | 4 (2-7)                    |                                 | 0 (0-0)                            |                                         | 0 (0-0)              |                           | 0 (0-0)                      | 0 (0-0)                           |
| 2009 | Turkey              | 22 (16-29)                |                                | 0 (0-0)                           |                                        | 4 (2-7)                    |                                 | 0 (0-0)                            |                                         | 0 (0-0)              |                           | 0 (0-0)                      | 0 (0-0)                           |
| 2010 | Turkey              | 15 (10-19)                |                                | 0 (0-0)                           |                                        | 4 (2-6)                    |                                 | 0 (0-0)                            |                                         | 0 (0-0)              |                           | 0 (0-0)                      | 0 (0-0)                           |
| 2011 | Turkey              | 14 (10-18)                |                                | 0 (0-0)                           |                                        | 4 (2-6)                    |                                 | 0 (0-0)                            |                                         | 0 (0-0)              |                           | 0 (0-0)                      | 0 (0-0)                           |
| 2012 | Turkey              | 2 (1-2)                   |                                | 0 (0-0)                           |                                        | 1 (0-1)                    |                                 | 0 (0-0)                            |                                         | 0 (0-0)              |                           | 0 (0-0)                      | 0 (0-0)                           |
| 2013 | Turkey              | 2 (2-3)                   |                                | 0 (0-0)                           |                                        | 1 (0-1)                    |                                 | 0 (0-0)                            |                                         | 0 (0-0)              |                           | 0 (0-0)                      | 0 (0-0)                           |
| 2014 | Turkey              | 2 (1-2)                   |                                | 0 (0-0)                           |                                        | 1 (0-1)                    |                                 | 0 (0-0)                            |                                         | 0 (0-0)              |                           | 0 (0-0)                      | 0 (0-0)                           |
| 2015 | Turkey              | 2 (1-2)                   | 0 (0-0)                        | 0 (0-0)                           | 0 (0-0)                                | 0 (0-1)                    | 0 (0-0)                         | 0 (0-0)                            | 0 (0-0)                                 | 0 (0-0)              | 0 (0-0)                   | 0 (0-0)                      | 0 (0-0)                           |
| 2000 | Turkmenistan        | 256 (180-336)             |                                | 53 (37-70)                        |                                        | 79 (27-124)                |                                 | 16 (6-26)                          |                                         | 0 (0-1)              |                           | 0 (0-0)                      | 0 (0-0)                           |
| 2001 | Turkmenistan        | 252 (177-331)             |                                | 54 (38-72)                        |                                        | 77 (27-120)                |                                 | 17 (6-26)                          |                                         | 0 (0-0)              |                           | 0 (0-0)                      | 0 (0-0)                           |
| 2002 | Turkmenistan        | 258 (181-339)             |                                | 56 (39-73)                        |                                        | 78 (27-122)                |                                 | 17 (6-26)                          |                                         | 0 (0-0)              |                           | 0 (0-0)                      | 0 (0-0)                           |
| 2003 | Turkmenistan        | 269 (189-354)             |                                | 57 (40-75)                        |                                        | 80 (26-130)                |                                 | 17 (5-27)                          |                                         | 1 (0-1)              |                           | 0 (0-0)                      | 0 (0-0)                           |
| 2004 | Turkmenistan        | 276 (194-363)             |                                | 57 (40-74)                        |                                        | 81 (26-131)                |                                 | 17 (5-27)                          |                                         | 1 (0-1)              |                           | 0 (0-0)                      | 0 (0-0)                           |
| 2005 | Turkmenistan        | 275 (193-361)             |                                | 55 (39-73)                        |                                        | 79 (26-128)                |                                 | 16 (5-26)                          |                                         | 1 (0-1)              |                           | 0 (0-0)                      | 0 (0-0)                           |
| 2006 | Turkmenistan        | 265 (186-348)             |                                | 51 (36-67)                        |                                        | 74 (24-120)                |                                 | 14 (5-23)                          |                                         | 1 (0-1)              |                           | 0 (0-0)                      | 0 (0-0)                           |
| 2007 | Turkmenistan        | 249 (175-328)             |                                | 48 (34-63)                        |                                        | 68 (22-110)                |                                 | 13 (4-21)                          |                                         | 1 (0-1)              |                           | 0 (0-0)                      | 0 (0-0)                           |
| 2008 | Turkmenistan        | 230 (161-302)             |                                | 45 (32-59)                        |                                        | 61 (20-99)                 |                                 | 12 (4-19)                          |                                         | 0 (0-1)              |                           | 0 (0-0)                      | 0 (0-0)                           |
| 2009 | Turkmenistan        | 211 (148-277)             |                                | 42 (30-55)                        |                                        | 55 (18-88)                 |                                 | 11 (4-18)                          |                                         | 0 (0-1)              |                           | 0 (0-0)                      | 0 (0-0)                           |
| 2010 | Turkmenistan        | 87 (61-114)               |                                | 17 (12-23)                        |                                        | 22 (7-35)                  |                                 | 4 (1-7)                            |                                         | 0 (0-0)              |                           | 0 (0-0)                      | 0 (0-0)                           |
| 2011 | Turkmenistan        | 22 (15-29)                |                                | 4 (3-6)                           |                                        | 5 (2-9)                    |                                 | 1 (0-2)                            |                                         | 0 (0-0)              |                           | 0 (0-0)                      | 0 (0-0)                           |
| 2012 | Turkmenistan        | 13 (9-17)                 |                                | 3 (2-4)                           |                                        | 3 (1-5)                    |                                 | 0 (0-0)                            |                                         | 0 (0-0)              |                           | 0 (0-0)                      | 0 (0-0)                           |
| 2013 | Turkmenistan        | 13 (9-17)                 |                                | 3 (2-3)                           |                                        | 3 (1-5)                    |                                 | 1 (0-1)                            |                                         | 0 (0-0)              |                           | 0 (0-0)                      | 0 (0-0)                           |
| 2014 | Turkmenistan        | 13 (9-17)                 |                                | 3 (2-3)                           |                                        | 3 (1-5)                    |                                 | 1 (0-1)                            |                                         | 0 (0-0)              |                           | 0 (0-0)                      | 0 (0-0)                           |
| 2015 | Turkmenistan        | 2 (1-2)                   | 0 (0-0)                        | 0 (0-0)                           | 0 (0-0)                                | 0 (0-1)                    | 0 (0-0)                         | 0 (0-0)                            | 0 (0-0)                                 | 0 (0-0)              | 0 (0-0)                   | 0 (0-0)                      | 0 (0-0)                           |
| 2000 | Tuvalu              | 0 (0-0)                   |                                | 19 (14-26)                        |                                        | 0 (0-0)                    |                                 | 6 (4-8)                            |                                         | 0 (0-0)              |                           | 0 (0-0)                      | 0 (0-0)                           |
| 2001 | Tuvalu              | 0 (0-0)                   |                                | 15 (11-20)                        |                                        | 0 (0-0)                    |                                 | 5 (3-6)                            |                                         | 0 (0-0)              |                           | 0 (0-0)                      | 0 (0-0)                           |
| 2002 | Tuvalu              | 0 (0-0)                   |                                | 15 (11-20)                        |                                        | 0 (0-0)                    |                                 | 5 (3-6)                            |                                         | 0 (0-0)              |                           | 0 (0-0)                      | 0 (0-0)                           |
| 2003 | Tuvalu              | 0 (0-0)                   |                                | 17 (12-22)                        |                                        | 0 (0-0)                    |                                 | 5 (3-7)                            |                                         | 0 (0-0)              |                           | 0 (0-0)                      | 0 (0-0)                           |
| 2004 | Tuvalu              | 0 (0-0)                   |                                | 12 (8-15)                         |                                        | 0 (0-0)                    |                                 | 4 (2-5)                            |                                         | 0 (0-0)              |                           | 0 (0-0)                      | 0 (0-0)                           |
| 2005 | Tuvalu              | 0 (0-0)                   |                                | 15 (11-20)                        |                                        | 0 (0-0)                    |                                 | 5 (3-6)                            |                                         | 0 (0-0)              |                           | 0 (0-0)                      | 0 (0-0)                           |
| 2006 | Tuvalu              | 0 (0-0)                   |                                | 13 (9-17)                         |                                        | 0 (0-0)                    |                                 | 4 (2-5)                            |                                         | 0 (0-0)              |                           | 0 (0-0)                      | 0 (0-0)                           |
| 2007 | Tuvalu              | 0 (0-0)                   |                                | 10 (7-13)                         |                                        | 0 (0-0)                    |                                 | 3 (2-4)                            |                                         | 0 (0-0)              |                           | 0 (0-0)                      | 0 (0-0)                           |
| 2008 | Tuvalu              | 0 (0-0)                   |                                | 9 (7-12)                          |                                        | 0 (0-0)                    |                                 | 3 (2-4)                            |                                         | 0 (0-0)              |                           | 0 (0-0)                      | 0 (0-0)                           |
| 2009 | Tuvalu              | 0 (0-0)                   |                                | 2 (2-3)                           |                                        | 0 (0-0)                    |                                 | 1 (1-2)                            |                                         | 0 (0-0)              |                           | 0 (0-0)                      | 0 (0-0)                           |
| 2010 | Tuvalu              | 0 (0-0)                   |                                | 1 (1-1)                           |                                        | 0 (0-0)                    |                                 | 1 (0-1)                            |                                         | 0 (0-0)              |                           | 0 (0-0)                      | 0 (0-0)                           |
| 2011 | Tuvalu              | 0 (0-0)                   |                                | 1 (1-1)                           |                                        | 0 (0-0)                    |                                 | 0 (0-1)                            |                                         | 0 (0-0)              |                           | 0 (0-0)                      | 0 (0-0)                           |
| 2012 | Tuvalu              | 0 (0-0)                   |                                | 1 (1-1)                           |                                        | 0 (0-0)                    |                                 | 0 (0-1)                            |                                         | 0 (0-0)              |                           | 0 (0-0)                      | 0 (0-0)                           |
| 2013 | Tuvalu              | 0 (0-0)                   |                                | 1 (1-1)                           |                                        | 0 (0-0)                    |                                 | 0 (0-1)                            |                                         | 0 (0-0)              |                           | 0 (0-0)                      | 0 (0-0)                           |
| 2014 | Tuvalu              | 0 (0-0)                   |                                | 0 (0-0)                           |                                        | 0 (0-0)                    |                                 | 0 (0-0)                            |                                         | 0 (0-0)              |                           | 0 (0-0)                      | 0 (0-0)                           |
| 2015 | Tuvalu              | 0 (0-0)                   | 0 (0-0)                        | 0 (0-0)                           | 0 (0-0)                                | 0 (0-0)                    | 0 (0-0)                         | 0 (0-0)                            | 0 (0-0)                                 | 0 (0-0)              | 0 (0-0)                   | 0 (0-0)                      | 0 (0-0)                           |
| 2000 | Uganda              | 3106 (2184-4081)          |                                | 67 (47-88)                        |                                        | 1428 (581-2210)            |                                 | 31 (12-48)                         |                                         | 6 (2-9)              |                           | 0 (0-0)                      | 0 (0-0)                           |
| 2001 | Uganda              | 3052 (2147-4010)          |                                | 64 (45-84)                        |                                        | 1396 (568-2161)            |                                 | 29 (12-45)                         |                                         | 6 (2-9)              |                           | 0 (0-0)                      | 0 (0-0)                           |
| 2002 | Uganda              | 2373 (1669-3118)          |                                | 48 (34-63)                        |                                        | 1077 (443-1661)            |                                 | 22 (9-34)                          |                                         | 4 (2-7)              |                           | 0 (0-0)                      | 0 (0-0)                           |
| 2003 | Uganda              | 470 (330-617)             |                                | 9 (6-12)                          |                                        | 211 (88-325)               |                                 | 4 (2-6)                            |                                         | 1 (0-1)              |                           | 0 (0-0)                      | 0 (0-0)                           |
| 2004 | Uganda              | 390 (274-512)             |                                | 7 (5-10)                          |                                        | 174 (73-266)               |                                 | 3 (1-5)                            |                                         | 1 (0-1)              |                           | 0 (0-0)                      | 0 (0-0)                           |
| 2005 | Uganda              | 375 (266-498)             |                                | 7 (5-9)                           |                                        | 167 (71-254)               |                                 | 7 (5-9)                            |                                         | 1 (0-1)              |                           | 0 (0-0)                      | 0 (0-0)                           |
| 2006 | Uganda              | 361 (254-474)             |                                | 6 (4-8)                           |                                        | 157 (68-238)               |                                 | 3 (1-4)                            |                                         | 1 (0-1)              |                           | 0 (0-0)                      | 0 (0-0)                           |
| 2007 | Uganda              | 28 (19-36)                |                                | 0 (0-1)                           |                                        | 12 (5-18)                  |                                 | 0 (0-0)                            |                                         | 0 (0-0)              |                           | 0 (0-0)                      | 0 (0-0)                           |
| 2008 | Uganda              | 27 (19-36)                |                                | 0 (0-1)                           |                                        | 11 (5-17)                  |                                 | 0 (0-0)                            |                                         | 0 (0-0)              |                           | 0 (0-0)                      | 0 (0-0)                           |
| 2009 | Uganda              | 26 (18-34)                |                                | 0 (0-1)                           |                                        | 11 (5-16)                  |                                 | 0 (0-0)                            |                                         | 0 (0-0)              |                           | 0 (0-0)                      | 0 (0-0)                           |
| 2010 | Uganda              | 26 (18-34)                |                                | 0 (0-1)                           |                                        | 11 (5-16)                  |                                 | 0 (0-0)                            |                                         | 0 (0-0)              |                           | 0 (0-0)                      | 0 (0-0)                           |
| 2011 | Uganda              | 26 (18-34)                |                                | 0 (0-1)                           |                                        | 10 (5-16)                  |                                 | 0 (0-0)                            |                                         | 0 (0-0)              |                           | 0 (0-0)                      | 0 (0-0)                           |
| 2012 | Uganda              | 25 (18-33)                |                                | 0 (0-0)                           |                                        | 10 (4-16)                  |                                 | 0 (0-0)                            |                                         | 0 (0-0)              |                           | 0 (0-0)                      | 0 (0-0)                           |
| 2013 | Uganda              | 25 (18-33)                |                                | 0 (0-0)                           |                                        | 10 (5-16)                  |                                 | 0 (0-0)                            |                                         | 0 (0-0)              |                           | 0 (0-0)                      | 0 (0-0)                           |
| 2014 | Uganda              | 25 (17-32)                |                                | 0 (0-0)                           |                                        | 10 (4-15)                  |                                 | 0 (0-0)                            |                                         | 0 (0-0)              |                           | 0 (0-0)                      | 0 (0-0)                           |
| 2015 | Uganda              | 24 (17-32)                | 1 (1-1)                        | 0 (0-0)                           | 0 (0-0)                                | 10 (4-15)                  | 0 (0-1)                         | 0 (0-0)                            | 0 (0-0)                                 | 0 (0-0)              | 0 (0-0)                   | 0 (0-0)                      | 0 (0-0)                           |
| 2000 | Ukraine             | 117 (82-154)              |                                | 6 (4-7)                           |                                        | 30 (8-58)                  |                                 | 1 (0-3)                            |                                         | 0 (0-0)              |                           | 0 (0-0)                      | 0 (0-0)                           |
| 2001 | Ukraine             | 104 (73-137)              |                                | 5 (4-7)                           |                                        | 26 (7-51)                  |                                 | 1 (0-3)                            |                                         | 0 (0-0)              |                           | 0 (0-0)                      | 0 (0-0)                           |
| 2002 | Ukraine             | 93 (64-119)               |                                | 5 (3-6)                           |                                        | 23 (6-44)                  |                                 | 1 (0-2)                            |                                         | 0 (0-0)              |                           | 0 (0-0)                      | 0 (0-0)                           |
| 2003 | Ukraine             | 81 (57-106)               |                                | 4 (3-5)                           |                                        | 21 (5-40)                  |                                 | 1 (0-2)                            |                                         | 0 (0-0)              |                           | 0 (0-0)                      | 0 (0-0)                           |
| 2004 | Ukraine             | 74 (52-97)                |                                | 4 (3-5)                           |                                        | 19 (5-37)                  |                                 | 1 (0-2)                            |                                         | 0 (0-0)              |                           | 0 (0-0)                      | 0 (0-0)                           |
| 2005 | Ukraine             | 70 (49-92)                |                                | 4 (3-5)                           |                                        | 18 (5-35)                  |                                 | 1 (0-2)                            |                                         | 0 (0-0)              |                           | 0 (0-0)                      | 0 (0-0)                           |
| 2006 | Ukraine             | 64 (45-85)                |                                | 3 (2-4)                           |                                        | 20 (5-39)                  |                                 | 1 (0-2)                            |                                         | 0 (0-0)              |                           | 0 (0-0)                      | 0 (0-0)                           |

Hib = *Haemophilus influenzae* type b; npmn = non-pneumonia, non-meningitis; HIV = deaths only in HIV-infected children; Uncertainty range provided in parentheses.

| Year | Country                     | Hib pneumonia deaths (UR) | Hib pneumonia deaths, HIV (UR) | Hib pneumonia mortality rate (UR) | Hib pneumonia mortality rate, HIV (UR) | Hib meningitis deaths (UR) | Hib meningitis deaths, HIV (UR) | Hib meningitis mortality rate (UR) | Hib meningitis mortality rate, HIV (UR) | Hib NPMN deaths (UR) | Hib NPMN deaths, HIV (UR) | Hib NPMN mortality rate (UR) | Hib NPMN mortality rate, HIV (UR) |
|------|-----------------------------|---------------------------|--------------------------------|-----------------------------------|----------------------------------------|----------------------------|---------------------------------|------------------------------------|-----------------------------------------|----------------------|---------------------------|------------------------------|-----------------------------------|
| 2007 | Ukraine                     | 13 (9-17)                 |                                | 1 (0-1)                           |                                        | 5 (1-9)                    |                                 | 0 (0-0)                            |                                         | 0 (0-0)              |                           | 0 (0-0)                      |                                   |
| 2008 | Ukraine                     | 8 (6-11)                  |                                | 0 (0-0)                           |                                        | 3 (1-6)                    |                                 | 0 (0-0)                            |                                         | 0 (0-0)              |                           | 0 (0-0)                      |                                   |
| 2009 | Ukraine                     | 10 (7-13)                 |                                | 0 (0-1)                           |                                        | 4 (1-7)                    |                                 | 0 (0-0)                            |                                         | 0 (0-0)              |                           | 0 (0-0)                      |                                   |
| 2010 | Ukraine                     | 11 (8-15)                 |                                | 0 (0-1)                           |                                        | 4 (1-8)                    |                                 | 0 (0-0)                            |                                         | 0 (0-0)              |                           | 0 (0-0)                      |                                   |
| 2011 | Ukraine                     | 34 (24-44)                |                                | 1 (1-2)                           |                                        | 11 (3-21)                  |                                 | 0 (0-1)                            |                                         | 0 (0-0)              |                           | 0 (0-0)                      |                                   |
| 2012 | Ukraine                     | 1 (0-1)                   |                                | 0 (0-0)                           |                                        | 0 (0-0)                    |                                 | 0 (0-0)                            |                                         | 0 (0-0)              |                           | 0 (0-0)                      |                                   |
| 2013 | Ukraine                     | 1 (0-1)                   |                                | 0 (0-0)                           |                                        | 0 (0-0)                    |                                 | 0 (0-0)                            |                                         | 0 (0-0)              |                           | 0 (0-0)                      |                                   |
| 2014 | Ukraine                     | 10 (7-14)                 |                                | 0 (0-1)                           |                                        | 4 (1-7)                    |                                 | 0 (0-0)                            |                                         | 0 (0-0)              |                           | 0 (0-0)                      |                                   |
| 2015 | Ukraine                     | 9 (6-12)                  | 0 (0-0)                        | 0 (0-0)                           | 0 (0-0)                                | 3 (1-6)                    | 0 (0-0)                         | 0 (0-0)                            | 0 (0-0)                                 | 0 (0-0)              | 0 (0-0)                   | 0 (0-0)                      | 0 (0-0)                           |
| 2000 | United Arab Emirates        | 1 (0-1)                   |                                | 0 (0-0)                           |                                        | 0 (0-0)                    |                                 | 0 (0-0)                            |                                         | 0 (0-0)              |                           | 0 (0-0)                      |                                   |
| 2001 | United Arab Emirates        | 0 (0-1)                   |                                | 0 (0-0)                           |                                        | 0 (0-0)                    |                                 | 0 (0-0)                            |                                         | 0 (0-0)              |                           | 0 (0-0)                      |                                   |
| 2002 | United Arab Emirates        | 0 (0-1)                   |                                | 0 (0-0)                           |                                        | 0 (0-0)                    |                                 | 0 (0-0)                            |                                         | 0 (0-0)              |                           | 0 (0-0)                      |                                   |
| 2003 | United Arab Emirates        | 0 (0-1)                   |                                | 0 (0-0)                           |                                        | 0 (0-0)                    |                                 | 0 (0-0)                            |                                         | 0 (0-0)              |                           | 0 (0-0)                      |                                   |
| 2004 | United Arab Emirates        | 0 (0-0)                   |                                | 0 (0-0)                           |                                        | 0 (0-0)                    |                                 | 0 (0-0)                            |                                         | 0 (0-0)              |                           | 0 (0-0)                      |                                   |
| 2005 | United Arab Emirates        | 0 (0-0)                   |                                | 0 (0-0)                           |                                        | 0 (0-0)                    |                                 | 0 (0-0)                            |                                         | 0 (0-0)              |                           | 0 (0-0)                      |                                   |
| 2006 | United Arab Emirates        | 0 (0-0)                   |                                | 0 (0-0)                           |                                        | 0 (0-0)                    |                                 | 0 (0-0)                            |                                         | 0 (0-0)              |                           | 0 (0-0)                      |                                   |
| 2007 | United Arab Emirates        | 0 (0-0)                   |                                | 0 (0-0)                           |                                        | 0 (0-0)                    |                                 | 0 (0-0)                            |                                         | 0 (0-0)              |                           | 0 (0-0)                      |                                   |
| 2008 | United Arab Emirates        | 0 (0-0)                   |                                | 0 (0-0)                           |                                        | 0 (0-0)                    |                                 | 0 (0-0)                            |                                         | 0 (0-0)              |                           | 0 (0-0)                      |                                   |
| 2009 | United Arab Emirates        | 0 (0-0)                   |                                | 0 (0-0)                           |                                        | 0 (0-0)                    |                                 | 0 (0-0)                            |                                         | 0 (0-0)              |                           | 0 (0-0)                      |                                   |
| 2010 | United Arab Emirates        | 0 (0-0)                   |                                | 0 (0-0)                           |                                        | 0 (0-0)                    |                                 | 0 (0-0)                            |                                         | 0 (0-0)              |                           | 0 (0-0)                      |                                   |
| 2011 | United Arab Emirates        | 0 (0-0)                   |                                | 0 (0-0)                           |                                        | 0 (0-0)                    |                                 | 0 (0-0)                            |                                         | 0 (0-0)              |                           | 0 (0-0)                      |                                   |
| 2012 | United Arab Emirates        | 0 (0-0)                   |                                | 0 (0-0)                           |                                        | 0 (0-0)                    |                                 | 0 (0-0)                            |                                         | 0 (0-0)              |                           | 0 (0-0)                      |                                   |
| 2013 | United Arab Emirates        | 0 (0-0)                   |                                | 0 (0-0)                           |                                        | 0 (0-0)                    |                                 | 0 (0-0)                            |                                         | 0 (0-0)              |                           | 0 (0-0)                      |                                   |
| 2014 | United Arab Emirates        | 0 (0-0)                   |                                | 0 (0-0)                           |                                        | 0 (0-0)                    |                                 | 0 (0-0)                            |                                         | 0 (0-0)              |                           | 0 (0-0)                      |                                   |
| 2015 | United Arab Emirates        | 0 (0-0)                   | 0 (0-0)                        | 0 (0-0)                           | 0 (0-0)                                | 0 (0-0)                    | 0 (0-0)                         | 0 (0-0)                            | 0 (0-0)                                 | 0 (0-0)              | 0 (0-0)                   | 0 (0-0)                      | 0 (0-0)                           |
| 2000 | United Kingdom              | 0 (0-0)                   |                                | 0 (0-0)                           |                                        | 0 (0-1)                    |                                 | 0 (0-0)                            |                                         | 0 (0-0)              |                           | 0 (0-0)                      |                                   |
| 2001 | United Kingdom              | 0 (0-0)                   |                                | 0 (0-0)                           |                                        | 0 (0-1)                    |                                 | 0 (0-0)                            |                                         | 0 (0-0)              |                           | 0 (0-0)                      |                                   |
| 2002 | United Kingdom              | 0 (0-0)                   |                                | 0 (0-0)                           |                                        | 0 (0-1)                    |                                 | 0 (0-0)                            |                                         | 0 (0-0)              |                           | 0 (0-0)                      |                                   |
| 2003 | United Kingdom              | 0 (0-0)                   |                                | 0 (0-0)                           |                                        | 0 (0-1)                    |                                 | 0 (0-0)                            |                                         | 0 (0-0)              |                           | 0 (0-0)                      |                                   |
| 2004 | United Kingdom              | 0 (0-0)                   |                                | 0 (0-0)                           |                                        | 0 (0-1)                    |                                 | 0 (0-0)                            |                                         | 0 (0-0)              |                           | 0 (0-0)                      |                                   |
| 2005 | United Kingdom              | 0 (0-0)                   |                                | 0 (0-0)                           |                                        | 0 (0-1)                    |                                 | 0 (0-0)                            |                                         | 0 (0-0)              |                           | 0 (0-0)                      |                                   |
| 2006 | United Kingdom              | 0 (0-0)                   |                                | 0 (0-0)                           |                                        | 0 (0-0)                    |                                 | 0 (0-0)                            |                                         | 0 (0-0)              |                           | 0 (0-0)                      |                                   |
| 2007 | United Kingdom              | 0 (0-0)                   |                                | 0 (0-0)                           |                                        | 0 (0-0)                    |                                 | 0 (0-0)                            |                                         | 0 (0-0)              |                           | 0 (0-0)                      |                                   |
| 2008 | United Kingdom              | 0 (0-0)                   |                                | 0 (0-0)                           |                                        | 12 (0-0)                   |                                 | 0 (0-0)                            |                                         | 0 (0-0)              |                           | 0 (0-0)                      |                                   |
| 2009 | United Kingdom              | 0 (0-0)                   |                                | 0 (0-0)                           |                                        | 0 (0-1)                    |                                 | 0 (0-0)                            |                                         | 0 (0-0)              |                           | 0 (0-0)                      |                                   |
| 2010 | United Kingdom              | 0 (0-0)                   |                                | 0 (0-0)                           |                                        | 0 (0-1)                    |                                 | 0 (0-0)                            |                                         | 0 (0-0)              |                           | 0 (0-0)                      |                                   |
| 2011 | United Kingdom              | 0 (0-1)                   |                                | 0 (0-0)                           |                                        | 0 (0-0)                    |                                 | 0 (0-0)                            |                                         | 0 (0-0)              |                           | 0 (0-0)                      |                                   |
| 2012 | United Kingdom              | 0 (0-0)                   |                                | 0 (0-0)                           |                                        | 0 (0-0)                    |                                 | 0 (0-0)                            |                                         | 0 (0-0)              |                           | 0 (0-0)                      |                                   |
| 2013 | United Kingdom              | 0 (0-0)                   |                                | 0 (0-0)                           |                                        | 0 (0-0)                    |                                 | 0 (0-0)                            |                                         | 0 (0-0)              |                           | 0 (0-0)                      |                                   |
| 2014 | United Kingdom              | 0 (0-0)                   |                                | 0 (0-0)                           |                                        | 0 (0-0)                    |                                 | 0 (0-0)                            |                                         | 0 (0-0)              |                           | 0 (0-0)                      |                                   |
| 2015 | United Kingdom              | 0 (0-0)                   | 0 (0-0)                        | 0 (0-0)                           | 0 (0-0)                                | 0 (0-0)                    | 0 (0-0)                         | 0 (0-0)                            | 0 (0-0)                                 | 0 (0-0)              | 0 (0-0)                   | 0 (0-0)                      | 0 (0-0)                           |
| 2000 | United Republic of Tanzania | 4382 (3082-5758)          |                                | 75 (53-99)                        |                                        | 1972 (706-3137)            |                                 | 34 (12-54)                         |                                         | 8 (3-13)             |                           | 0 (0-0)                      |                                   |
| 2001 | United Republic of Tanzania | 4244 (2985-5577)          |                                | 71 (50-93)                        |                                        | 1902 (695-3017)            |                                 | 32 (12-50)                         |                                         | 8 (3-12)             |                           | 0 (0-0)                      |                                   |
| 2002 | United Republic of Tanzania | 4063 (2856-5339)          |                                | 66 (46-86)                        |                                        | 1811 (663-2863)            |                                 | 29 (11-46)                         |                                         | 7 (3-12)             |                           | 0 (0-0)                      |                                   |
| 2003 | United Republic of Tanzania | 4108 (2869-5398)          |                                | 64 (45-84)                        |                                        | 1815 (673-2862)            |                                 | 28 (11-45)                         |                                         | 7 (3-12)             |                           | 0 (0-0)                      |                                   |
| 2004 | United Republic of Tanzania | 4005 (2817-5263)          |                                | 60 (42-79)                        |                                        | 1748 (656-2748)            |                                 | 26 (10-41)                         |                                         | 7 (3-11)             |                           | 0 (0-0)                      |                                   |
| 2005 | United Republic of Tanzania | 3885 (2733-5105)          |                                | 56 (40-74)                        |                                        | 1671 (628-2631)            |                                 | 24 (9-38)                          |                                         | 7 (3-11)             |                           | 0 (0-0)                      |                                   |
| 2006 | United Republic of Tanzania | 3748 (2636-4924)          |                                | 52 (37-69)                        |                                        | 1588 (610-2486)            |                                 | 22 (9-35)                          |                                         | 6 (2-10)             |                           | 0 (0-0)                      |                                   |
| 2007 | United Republic of Tanzania | 3521 (2477-4627)          |                                | 48 (34-63)                        |                                        | 1471 (577-2289)            |                                 | 20 (8-31)                          |                                         | 6 (2-9)              |                           | 0 (0-0)                      |                                   |
| 2008 | United Republic of Tanzania | 3339 (2348-4387)          |                                | 44 (31-58)                        |                                        | 1376 (506-2198)            |                                 | 18 (7-29)                          |                                         | 11 (4-18)            |                           | 0 (0-0)                      |                                   |
| 2009 | United Republic of Tanzania | 521 (366-684)             |                                | 7 (5-9)                           |                                        | 212 (80-336)               |                                 | 3 (1-4)                            |                                         | 2 (1-3)              |                           | 0 (0-0)                      |                                   |
| 2010 | United Republic of Tanzania | 245 (173-322)             |                                | 3 (2-4)                           |                                        | 99 (38-156)                |                                 | 1 (0-2)                            |                                         | 1 (0-1)              |                           | 0 (0-0)                      |                                   |
| 2011 | United Republic of Tanzania | 245 (172-322)             |                                | 3 (2-4)                           |                                        | 98 (38-153)                |                                 | 1 (0-2)                            |                                         | 1 (0-1)              |                           | 0 (0-0)                      |                                   |
| 2012 | United Republic of Tanzania | 233 (164-307)             |                                | 3 (2-4)                           |                                        | 93 (37-145)                |                                 | 1 (0-2)                            |                                         | 1 (0-1)              |                           | 0 (0-0)                      |                                   |
| 2013 | United Republic of Tanzania | 239 (168-314)             |                                | 3 (2-4)                           |                                        | 94 (38-147)                |                                 | 1 (0-2)                            |                                         | 1 (0-1)              |                           | 0 (0-0)                      |                                   |
| 2014 | United Republic of Tanzania | 30 (21-39)                |                                | 0 (0-0)                           |                                        | 12 (5-18)                  |                                 | 0 (0-0)                            |                                         | 0 (0-0)              |                           | 0 (0-0)                      |                                   |
| 2015 | United Republic of Tanzania | 29 (21-39)                | 1 (0-1)                        | 0 (0-0)                           | 0 (0-0)                                | 11 (5-18)                  | 0 (0-0)                         | 0 (0-0)                            | 0 (0-0)                                 | 0 (0-0)              | 0 (0-0)                   | 0 (0-0)                      | 0 (0-0)                           |
| 2000 | United States of America    | 2 (1-3)                   |                                | 0 (0-0)                           |                                        | 2 (1-3)                    |                                 | 0 (0-0)                            |                                         | 0 (0-0)              |                           | 0 (0-0)                      |                                   |
| 2001 | United States of America    | 2 (1-3)                   |                                | 0 (0-0)                           |                                        | 1 (1-2)                    |                                 | 0 (0-0)                            |                                         | 0 (0-0)              |                           | 0 (0-0)                      |                                   |
| 2002 | United States of America    | 2 (1-3)                   |                                | 0 (0-0)                           |                                        | 1 (1-2)                    |                                 | 0 (0-0)                            |                                         | 0 (0-0)              |                           | 0 (0-0)                      |                                   |
| 2003 | United States of America    | 3 (2-3)                   |                                | 0 (0-0)                           |                                        | 1 (1-2)                    |                                 | 0 (0-0)                            |                                         | 0 (0-0)              |                           | 0 (0-0)                      |                                   |
| 2004 | United States of America    | 3 (2-3)                   |                                | 0 (0-0)                           |                                        | 1 (1-2)                    |                                 | 0 (0-0)                            |                                         | 0 (0-0)              |                           | 0 (0-0)                      |                                   |
| 2005 | United States of America    | 2 (2-3)                   |                                | 0 (0-0)                           |                                        | 2 (1-3)                    |                                 | 0 (0-0)                            |                                         | 0 (0-0)              |                           | 0 (0-0)                      |                                   |
| 2006 | United States of America    | 2 (2-3)                   |                                | 0 (0-0)                           |                                        | 1 (1-2)                    |                                 | 0 (0-0)                            |                                         | 0 (0-0)              |                           | 0 (0-0)                      |                                   |
| 2007 | United States of America    | 2 (2-3)                   |                                | 0 (0-0)                           |                                        | 1 (1-2)                    |                                 | 0 (0-0)                            |                                         | 0 (0-0)              |                           | 0 (0-0)                      |                                   |
| 2008 | United States of America    | 2 (2-3)                   |                                | 0 (0-0)                           |                                        | 1 (0-2)                    |                                 | 0 (0-0)                            |                                         | 0 (0-0)              |                           | 0 (0-0)                      |                                   |
| 2009 | United States of America    | 2 (2-3)                   |                                | 0 (0-0)                           |                                        | 1 (0-2)                    |                                 | 0 (0-0)                            |                                         | 0 (0-0)              |                           | 0 (0-0)                      |                                   |
| 2010 | United States of America    | 2 (1-3)                   |                                | 0 (0-0)                           |                                        | 1 (1-3)                    |                                 | 0 (0-0)                            |                                         | 0 (0-0)              |                           | 0 (0-0)                      |                                   |
| 2011 | United States of America    | 2 (2-3)                   |                                | 0 (0-0)                           |                                        | 1 (0-2)                    |                                 | 0 (0-0)                            |                                         | 0 (0-0)              |                           | 0 (0-0)                      |                                   |
| 2012 | United States of America    | 2 (1-3)                   |                                | 0 (0-0)                           |                                        | 1 (0-1)                    |                                 | 0 (0-0)                            |                                         | 0 (0-0)              |                           | 0 (0-0)                      |                                   |
| 2013 | United States of America    | 2 (1-2)                   |                                | 0 (0-0)                           |                                        | 1 (0-2)                    |                                 | 0 (0-0)                            |                                         | 0 (0-0)              |                           | 0 (0-0)                      |                                   |
| 2014 | United States of America    | 2 (1-3)                   |                                | 0 (0-0)                           |                                        | 1 (0-2)                    |                                 | 0 (0-0)                            |                                         | 0 (0-0)              |                           | 0 (0-0)                      |                                   |
| 2015 | United States of America    | 2 (1-3)                   | 0 (0-0)                        | 0 (0-0)                           | 0 (0-0)                                | 1 (0-1)                    | 0 (0-0)                         | 0 (0-0)                            | 0 (0-0)                                 | 0 (0-0)              | 0 (0-0)                   | 0 (0-0)                      | 0 (0-0)                           |
| 2000 | Uruguay                     | 1 (1-2)                   |                                | 0 (0-1)                           |                                        | 0 (0-1)                    |                                 | 0 (0-0)                            |                                         | 0 (0-0)              |                           | 0 (0-0)                      |                                   |
| 2001 | Uruguay                     | 2 (1-2)                   |                                | 1 (0-1)                           |                                        | 1 (0-1)                    |                                 | 0 (0-0)                            |                                         | 0 (0-0)              |                           | 0 (0-0)                      |                                   |
| 2002 | Uruguay                     | 0 (0-0)                   |                                | 0 (0-0)                           |                                        | 0 (0-0)                    |                                 | 0 (0-0)                            |                                         | 0 (0-0)              |                           | 0 (0-0)                      |                                   |
| 2003 | Uruguay                     | 0 (0-0)                   |                                | 0 (0-0)                           |                                        | 0 (0-0)                    |                                 | 0 (0-0)                            |                                         | 0 (0-0)              |                           | 0 (0-0)                      |                                   |
| 2004 | Uruguay                     | 0 (0-0)                   |                                | 0 (0-0)                           |                                        | 0 (0-0)                    |                                 | 0 (0-0)                            |                                         | 0 (0-0)              |                           | 0 (0-0)                      |                                   |
| 2005 | Uruguay                     | 0 (0-0)                   |                                | 0 (0-0)                           |                                        | 0 (0-0)                    |                                 | 0 (0-0)                            |                                         | 0 (0-0)              |                           | 0 (0-0)                      |                                   |
| 2006 | Uruguay                     | 0 (0-0)                   |                                | 0 (0-0)                           |                                        | 0 (0-0)                    |                                 | 0 (0-0)                            |                                         | 0 (0-0)              |                           | 0 (0-0)                      |                                   |
| 2007 | Uruguay                     | 0 (0-0)                   |                                | 0 (0-0)                           |                                        | 0 (0-0)                    |                                 | 0 (0-0)                            |                                         | 0 (0-0)              |                           | 0 (0-0)                      |                                   |
| 2008 | Uruguay                     | 0 (0-0)                   |                                | 0 (0-0)                           |                                        | 0 (0-0)                    |                                 | 0 (0-0)                            |                                         | 0 (0-0)              |                           | 0 (0-0)                      |                                   |
| 2009 | Uruguay                     | 0 (0-0)                   |                                | 0 (0-0)                           |                                        | 0 (0-0)                    |                                 | 0 (0-0)                            |                                         | 0 (0-0)              |                           | 0 (0-0)                      |                                   |
| 2010 | Uruguay                     | 0 (0-0)                   |                                | 0 (0-0)                           |                                        | 0 (0-0)                    |                                 | 0 (0-0)                            |                                         | 0 (0-0)              |                           | 0 (0-0)                      |                                   |
| 2011 | Uruguay                     | 0 (0-0)                   |                                | 0 (0-0)                           |                                        | 0 (0-0)                    |                                 | 0 (0-0)                            |                                         | 0 (0-0)              |                           | 0 (0-0)                      |                                   |
| 2012 | Uruguay                     | 0 (0-0)                   |                                | 0 (0-0)                           |                                        | 0 (0-0)                    |                                 | 0 (0-0)                            |                                         | 0 (0-0)              |                           | 0 (0-0)                      |                                   |
| 2013 | Uruguay                     | 0 (0-0)                   |                                | 0 (0-0)                           |                                        | 0 (0-0)                    |                                 | 0 (0-0)                            |                                         | 0 (0-0)              |                           | 0 (0-0)                      |                                   |
| 2014 | Uruguay                     | 0 (0-0)                   |                                | 0 (0-0)                           |                                        | 0 (0-0)                    |                                 | 0 (0-0)                            |                                         | 0 (0-0)              |                           | 0 (0-0)                      |                                   |

Hib = *Haemophilus influenzae* type b; npmn = non-pneumonia, non-meningitis; HIV = deaths only in HIV-infected children; Uncertainty range provided in parentheses.

| Year | Country                            | Hib pneumonia deaths (UR) | Hib pneumonia deaths, HIV (UR) | Hib pneumonia mortality rate (UR) | Hib pneumonia mortality rate, HIV (UR) | Hib meningitis deaths (UR) | Hib meningitis deaths, HIV (UR) | Hib meningitis mortality rate (UR) | Hib meningitis mortality rate, HIV (UR) | Hib NPMN deaths (UR) | Hib NPMN deaths, HIV (UR) | Hib NPMN mortality rate (UR) | Hib NPMN mortality rate, HIV (UR) |
|------|------------------------------------|---------------------------|--------------------------------|-----------------------------------|----------------------------------------|----------------------------|---------------------------------|------------------------------------|-----------------------------------------|----------------------|---------------------------|------------------------------|-----------------------------------|
| 2015 | Uruguay                            | 0 (0-0)                   | 0 (0-0)                        | 0 (0-0)                           | 0 (0-0)                                | 0 (0-0)                    | 0 (0-0)                         | 0 (0-0)                            | 0 (0-0)                                 | 0 (0-0)              | 0 (0-0)                   | 0 (0-0)                      | 0 (0-0)                           |
| 2000 | Uzbekistan                         | 995 (700-1308)            |                                | 37 (26-49)                        |                                        | 369 (134-682)              |                                 | 14 (5-22)                          |                                         | 3 (1-5)              |                           | 0 (0-0)                      | 0 (0-0)                           |
| 2001 | Uzbekistan                         | 945 (664-1241)            |                                | 36 (25-47)                        |                                        | 347 (127-548)              |                                 | 13 (5-21)                          |                                         | 3 (1-4)              |                           | 0 (0-0)                      | 0 (0-0)                           |
| 2002 | Uzbekistan                         | 898 (631-1180)            |                                | 35 (25-46)                        |                                        | 326 (120-514)              |                                 | 13 (5-20)                          |                                         | 3 (1-4)              |                           | 0 (0-0)                      | 0 (0-0)                           |
| 2003 | Uzbekistan                         | 855 (601-1123)            |                                | 34 (24-45)                        |                                        | 307 (113-483)              |                                 | 12 (4-19)                          |                                         | 2 (1-4)              |                           | 0 (0-0)                      | 0 (0-0)                           |
| 2004 | Uzbekistan                         | 832 (585-1093)            |                                | 33 (23-44)                        |                                        | 294 (109-461)              |                                 | 12 (4-19)                          |                                         | 2 (1-4)              |                           | 0 (0-0)                      | 0 (0-0)                           |
| 2005 | Uzbekistan                         | 811 (571-1066)            |                                | 33 (23-43)                        |                                        | 281 (105-440)              |                                 | 11 (4-18)                          |                                         | 2 (1-4)              |                           | 0 (0-0)                      | 0 (0-0)                           |
| 2006 | Uzbekistan                         | 806 (567-1058)            |                                | 32 (22-42)                        |                                        | 272 (102-427)              |                                 | 11 (4-17)                          |                                         | 2 (1-3)              |                           | 0 (0-0)                      | 0 (0-0)                           |
| 2007 | Uzbekistan                         | 805 (566-1058)            |                                | 31 (22-41)                        |                                        | 266 (100-416)              |                                 | 10 (4-16)                          |                                         | 2 (1-3)              |                           | 0 (0-0)                      | 0 (0-0)                           |
| 2008 | Uzbekistan                         | 813 (572-1068)            |                                | 31 (22-40)                        |                                        | 263 (99-411)               |                                 | 10 (4-15)                          |                                         | 2 (1-3)              |                           | 0 (0-0)                      | 0 (0-0)                           |
| 2009 | Uzbekistan                         | 124 (87-163)              |                                | 5 (3-6)                           |                                        | 39 (15-61)                 |                                 | 1 (1-2)                            |                                         | 0 (0-0)              |                           | 0 (0-0)                      | 0 (0-0)                           |
| 2010 | Uzbekistan                         | 49 (34-64)                |                                | 2 (1-2)                           |                                        | 15 (6-24)                  |                                 | 0 (0-1)                            |                                         | 0 (0-0)              |                           | 0 (0-0)                      | 0 (0-0)                           |
| 2011 | Uzbekistan                         | 48 (34-63)                |                                | 2 (1-2)                           |                                        | 15 (6-23)                  |                                 | 0 (0-1)                            |                                         | 0 (0-0)              |                           | 0 (0-0)                      | 0 (0-0)                           |
| 2012 | Uzbekistan                         | 47 (33-61)                |                                | 2 (1-2)                           |                                        | 14 (5-22)                  |                                 | 0 (0-1)                            |                                         | 0 (0-0)              |                           | 0 (0-0)                      | 0 (0-0)                           |
| 2013 | Uzbekistan                         | 45 (32-59)                |                                | 1 (1-2)                           |                                        | 14 (5-21)                  |                                 | 0 (0-1)                            |                                         | 0 (0-0)              |                           | 0 (0-0)                      | 0 (0-0)                           |
| 2014 | Uzbekistan                         | 7 (5-10)                  |                                | 0 (0-0)                           |                                        | 2 (1-3)                    |                                 | 0 (0-0)                            |                                         | 0 (0-0)              |                           | 0 (0-0)                      | 0 (0-0)                           |
| 2015 | Uzbekistan                         | 7 (5-9)                   | 0 (0-0)                        | 0 (0-0)                           | 0 (0-0)                                | 2 (1-3)                    | 0 (0-0)                         | 0 (0-0)                            | 0 (0-0)                                 | 0 (0-0)              | 0 (0-0)                   | 0 (0-0)                      | 0 (0-0)                           |
| 2000 | Vanuatu                            | 4 (3-5)                   |                                | 14 (10-19)                        |                                        | 1 (0-2)                    |                                 | 4 (1-6)                            |                                         | 0 (0-0)              |                           | 0 (0-0)                      | 0 (0-0)                           |
| 2001 | Vanuatu                            | 4 (3-5)                   |                                | 14 (10-18)                        |                                        | 1 (0-2)                    |                                 | 4 (1-6)                            |                                         | 0 (0-0)              |                           | 0 (0-0)                      | 0 (0-0)                           |
| 2002 | Vanuatu                            | 3 (2-4)                   |                                | 11 (8-14)                         |                                        | 1 (0-1)                    |                                 | 3 (1-4)                            |                                         | 0 (0-0)              |                           | 0 (0-0)                      | 0 (0-0)                           |
| 2003 | Vanuatu                            | 3 (2-3)                   |                                | 9 (6-12)                          |                                        | 1 (0-1)                    |                                 | 3 (1-4)                            |                                         | 0 (0-0)              |                           | 0 (0-0)                      | 0 (0-0)                           |
| 2004 | Vanuatu                            | 3 (2-4)                   |                                | 10 (7-13)                         |                                        | 1 (0-1)                    |                                 | 3 (1-4)                            |                                         | 0 (0-0)              |                           | 0 (0-0)                      | 0 (0-0)                           |
| 2005 | Vanuatu                            | 4 (3-5)                   |                                | 12 (9-16)                         |                                        | 1 (0-1)                    |                                 | 4 (1-5)                            |                                         | 0 (0-0)              |                           | 0 (0-0)                      | 0 (0-0)                           |
| 2006 | Vanuatu                            | 4 (3-5)                   |                                | 13 (9-17)                         |                                        | 1 (0-2)                    |                                 | 4 (1-5)                            |                                         | 0 (0-0)              |                           | 0 (0-0)                      | 0 (0-0)                           |
| 2007 | Vanuatu                            | 4 (3-5)                   |                                | 14 (10-18)                        |                                        | 1 (0-2)                    |                                 | 4 (1-6)                            |                                         | 0 (0-0)              |                           | 0 (0-0)                      | 0 (0-0)                           |
| 2008 | Vanuatu                            | 4 (3-4)                   |                                | 14 (10-18)                        |                                        | 1 (0-2)                    |                                 | 4 (1-6)                            |                                         | 0 (0-0)              |                           | 0 (0-0)                      | 0 (0-0)                           |
| 2009 | Vanuatu                            | 5 (3-6)                   |                                | 14 (10-19)                        |                                        | 1 (0-2)                    |                                 | 4 (1-6)                            |                                         | 0 (0-0)              |                           | 0 (0-0)                      | 0 (0-0)                           |
| 2010 | Vanuatu                            | 5 (3-6)                   |                                | 14 (10-19)                        |                                        | 1 (0-2)                    |                                 | 4 (1-6)                            |                                         | 0 (0-0)              |                           | 0 (0-0)                      | 0 (0-0)                           |
| 2011 | Vanuatu                            | 2 (1-2)                   |                                | 5 (4-7)                           |                                        | 1 (0-1)                    |                                 | 3 (1-4)                            |                                         | 0 (0-0)              |                           | 0 (0-0)                      | 0 (0-0)                           |
| 2012 | Vanuatu                            | 1 (0-1)                   |                                | 2 (1-2)                           |                                        | 0 (0-1)                    |                                 | 1 (0-2)                            |                                         | 0 (0-0)              |                           | 0 (0-0)                      | 0 (0-0)                           |
| 2013 | Vanuatu                            | 1 (0-1)                   |                                | 2 (1-2)                           |                                        | 0 (0-1)                    |                                 | 1 (0-2)                            |                                         | 0 (0-0)              |                           | 0 (0-0)                      | 0 (0-0)                           |
| 2014 | Vanuatu                            | 1 (0-1)                   |                                | 2 (1-2)                           |                                        | 0 (0-1)                    |                                 | 1 (0-2)                            |                                         | 0 (0-0)              |                           | 0 (0-0)                      | 0 (0-0)                           |
| 2015 | Vanuatu                            | 1 (0-1)                   | 0 (0-0)                        | 2 (1-2)                           | 0 (0-0)                                | 0 (0-0)                    | 0 (0-0)                         | 1 (0-1)                            | 0 (0-0)                                 | 0 (0-0)              | 0 (0-0)                   | 0 (0-0)                      | 0 (0-0)                           |
| 2000 | Venezuela (Bolivarian Republic of) | 143 (100-187)             |                                | 5 (4-7)                           |                                        | 84 (12-146)                |                                 | 3 (0-5)                            |                                         | 1 (0-1)              |                           | 0 (0-0)                      | 0 (0-0)                           |
| 2001 | Venezuela (Bolivarian Republic of) | 59 (41-77)                |                                | 2 (1-3)                           |                                        | 30 (4-52)                  |                                 | 1 (0-2)                            |                                         | 0 (0-0)              |                           | 0 (0-0)                      | 0 (0-0)                           |
| 2002 | Venezuela (Bolivarian Republic of) | 22 (15-29)                |                                | 1 (1-1)                           |                                        | 13 (2-23)                  |                                 | 0 (0-1)                            |                                         | 0 (0-0)              |                           | 0 (0-0)                      | 0 (0-0)                           |
| 2003 | Venezuela (Bolivarian Republic of) | 27 (19-36)                |                                | 1 (1-1)                           |                                        | 10 (1-17)                  |                                 | 0 (0-1)                            |                                         | 0 (0-0)              |                           | 0 (0-0)                      | 0 (0-0)                           |
| 2004 | Venezuela (Bolivarian Republic of) | 27 (19-35)                |                                | 1 (1-1)                           |                                        | 13 (2-23)                  |                                 | 0 (0-1)                            |                                         | 0 (0-0)              |                           | 0 (0-0)                      | 0 (0-0)                           |
| 2005 | Venezuela (Bolivarian Republic of) | 2 (1-2)                   |                                | 0 (0-0)                           |                                        | 1 (0-2)                    |                                 | 0 (0-0)                            |                                         | 0 (0-0)              |                           | 0 (0-0)                      | 0 (0-0)                           |
| 2006 | Venezuela (Bolivarian Republic of) | 2 (1-2)                   |                                | 0 (0-0)                           |                                        | 1 (0-1)                    |                                 | 0 (0-0)                            |                                         | 0 (0-0)              |                           | 0 (0-0)                      | 0 (0-0)                           |
| 2007 | Venezuela (Bolivarian Republic of) | 21 (15-28)                |                                | 1 (1-1)                           |                                        | 9 (1-16)                   |                                 | 0 (0-1)                            |                                         | 0 (0-0)              |                           | 0 (0-0)                      | 0 (0-0)                           |
| 2008 | Venezuela (Bolivarian Republic of) | 23 (16-30)                |                                | 1 (1-1)                           |                                        | 11 (2-19)                  |                                 | 0 (0-1)                            |                                         | 0 (0-0)              |                           | 0 (0-0)                      | 0 (0-0)                           |
| 2009 | Venezuela (Bolivarian Republic of) | 1 (1-2)                   |                                | 0 (0-0)                           |                                        | 1 (0-1)                    |                                 | 0 (0-0)                            |                                         | 0 (0-0)              |                           | 0 (0-0)                      | 0 (0-0)                           |
| 2010 | Venezuela (Bolivarian Republic of) | 1 (1-2)                   |                                | 0 (0-0)                           |                                        | 1 (0-1)                    |                                 | 0 (0-0)                            |                                         | 0 (0-0)              |                           | 0 (0-0)                      | 0 (0-0)                           |
| 2011 | Venezuela (Bolivarian Republic of) | 1 (1-2)                   |                                | 0 (0-0)                           |                                        | 1 (0-1)                    |                                 | 0 (0-0)                            |                                         | 0 (0-0)              |                           | 0 (0-0)                      | 0 (0-0)                           |
| 2012 | Venezuela (Bolivarian Republic of) | 1 (1-2)                   |                                | 0 (0-0)                           |                                        | 1 (0-1)                    |                                 | 0 (0-0)                            |                                         | 0 (0-0)              |                           | 0 (0-0)                      | 0 (0-0)                           |
| 2013 | Venezuela (Bolivarian Republic of) | 1 (1-2)                   |                                | 0 (0-0)                           |                                        | 1 (0-1)                    |                                 | 0 (0-0)                            |                                         | 0 (0-0)              |                           | 0 (0-0)                      | 0 (0-0)                           |
| 2014 | Venezuela (Bolivarian Republic of) | 1 (1-2)                   |                                | 0 (0-0)                           |                                        | 1 (0-1)                    |                                 | 0 (0-0)                            |                                         | 0 (0-0)              |                           | 0 (0-0)                      | 0 (0-0)                           |
| 2015 | Venezuela (Bolivarian Republic of) | 1 (1-2)                   | 0 (0-0)                        | 0 (0-0)                           | 0 (0-0)                                | 1 (0-1)                    | 0 (0-0)                         | 0 (0-0)                            | 0 (0-0)                                 | 0 (0-0)              | 0 (0-0)                   | 0 (0-0)                      | 0 (0-0)                           |
| 2000 | Viet Nam                           | 1053 (741-1384)           |                                | 15 (10-19)                        |                                        | 225 (78-361)               |                                 | 3 (1-5)                            |                                         | 2 (1-3)              |                           | 0 (0-0)                      | 0 (0-0)                           |
| 2001 | Viet Nam                           | 1004 (706-1319)           |                                | 15 (11-20)                        |                                        | 216 (78-343)               |                                 | 3 (1-5)                            |                                         | 2 (1-3)              |                           | 0 (0-0)                      | 0 (0-0)                           |
| 2002 | Viet Nam                           | 1017 (716-1337)           |                                | 16 (11-21)                        |                                        | 220 (86-343)               |                                 | 3 (1-5)                            |                                         | 2 (1-3)              |                           | 0 (0-0)                      | 0 (0-0)                           |
| 2003 | Viet Nam                           | 1038 (730-1364)           |                                | 16 (11-21)                        |                                        | 224 (91-349)               |                                 | 3 (1-5)                            |                                         | 2 (1-3)              |                           | 0 (0-0)                      | 0 (0-0)                           |
| 2004 | Viet Nam                           | 1037 (729-1362)           |                                | 16 (11-21)                        |                                        | 222 (82-364)               |                                 | 3 (1-6)                            |                                         | 2 (0-3)              |                           | 0 (0-0)                      | 0 (0-0)                           |
| 2005 | Viet Nam                           | 1014 (713-1333)           |                                | 15 (11-20)                        |                                        | 216 (84-352)               |                                 | 3 (1-5)                            |                                         | 2 (0-3)              |                           | 0 (0-0)                      | 0 (0-0)                           |
| 2006 | Viet Nam                           | 967 (680-1271)            |                                | 14 (10-19)                        |                                        | 205 (66-329)               |                                 | 3 (1-5)                            |                                         | 2 (0-3)              |                           | 0 (0-0)                      | 0 (0-0)                           |
| 2007 | Viet Nam                           | 902 (634-1185)            |                                | 13 (9-17)                         |                                        | 192 (41-315)               |                                 | 3 (1-5)                            |                                         | 2 (0-3)              |                           | 0 (0-0)                      | 0 (0-0)                           |
| 2008 | Viet Nam                           | 822 (578-1079)            |                                | 12 (8-15)                         |                                        | 177 (66-293)               |                                 | 3 (1-4)                            |                                         | 1 (0-2)              |                           | 0 (0-0)                      | 0 (0-0)                           |
| 2009 | Viet Nam                           | 757 (533-995)             |                                | 11 (8-14)                         |                                        | 164 (31-274)               |                                 | 2 (0-4)                            |                                         | 1 (0-2)              |                           | 0 (0-0)                      | 0 (0-0)                           |
| 2010 | Viet Nam                           | 283 (199-372)             |                                | 4 (3-5)                           |                                        | 96 (18-162)                |                                 | 1 (0-2)                            |                                         | 1 (0-1)              |                           | 0 (0-0)                      | 0 (0-0)                           |
| 2011 | Viet Nam                           | 55 (39-73)                |                                | 1 (1-1)                           |                                        | 22 (4-37)                  |                                 | 0 (0-1)                            |                                         | 0 (0-0)              |                           | 0 (0-0)                      | 0 (0-0)                           |
| 2012 | Viet Nam                           | 51 (36-67)                |                                | 1 (0-1)                           |                                        | 20 (4-33)                  |                                 | 0 (0-0)                            |                                         | 0 (0-0)              |                           | 0 (0-0)                      | 0 (0-0)                           |
| 2013 | Viet Nam                           | 97 (68-127)               |                                | 1 (1-2)                           |                                        | 35 (7-57)                  |                                 | 0 (0-1)                            |                                         | 0 (0-0)              |                           | 0 (0-0)                      | 0 (0-0)                           |
| 2014 | Viet Nam                           | 52 (37-68)                |                                | 1 (0-1)                           |                                        | 19 (4-30)                  |                                 | 0 (0-0)                            |                                         | 0 (0-0)              |                           | 0 (0-0)                      | 0 (0-0)                           |
| 2015 | Viet Nam                           | 7 (5-9)                   | 0 (0-0)                        | 0 (0-0)                           | 0 (0-0)                                | 3 (1-4)                    | 0 (0-0)                         | 0 (0-0)                            | 0 (0-0)                                 | 0 (0-0)              | 0 (0-0)                   | 0 (0-0)                      | 0 (0-0)                           |
| 2000 | Yemen                              | 1858 (1306-2441)          |                                | 60 (42-79)                        |                                        | 599 (207-943)              |                                 | 19 (7-31)                          |                                         | 2 (1-4)              |                           | 0 (0-0)                      | 0 (0-0)                           |
| 2001 | Yemen                              | 1773 (1247-2329)          |                                | 58 (41-76)                        |                                        | 569 (195-898)              |                                 | 19 (6-29)                          |                                         | 2 (1-4)              |                           | 0 (0-0)                      | 0 (0-0)                           |
| 2002 | Yemen                              | 1700 (1196-2234)          |                                | 55 (39-72)                        |                                        | 544 (185-859)              |                                 | 18 (6-28)                          |                                         | 2 (1-4)              |                           | 0 (0-0)                      | 0 (0-0)                           |
| 2003 | Yemen                              | 1646 (1157-2162)          |                                | 52 (37-69)                        |                                        | 525 (177-831)              |                                 | 17 (6-26)                          |                                         | 2 (1-3)              |                           | 0 (0-0)                      | 0 (0-0)                           |
| 2004 | Yemen                              | 1588 (1117-2087)          |                                | 49 (35-65)                        |                                        | 506 (169-802)              |                                 | 16 (5-25)                          |                                         | 2 (1-3)              |                           | 0 (0-0)                      | 0 (0-0)                           |
| 2005 | Yemen                              | 998 (700-1309)            |                                | 30 (21-40)                        |                                        | 317 (94-518)               |                                 | 10 (3-16)                          |                                         | 3 (1-4)              |                           | 0 (0-0)                      | 0 (0-0)                           |
| 2006 | Yemen                              | 168 (118-221)             |                                | 5 (3-7)                           |                                        | 53 (16-87)                 |                                 | 2 (0-3)                            |                                         | 0 (0-1)              |                           | 0 (0-0)                      | 0 (0-0)                           |
| 2007 | Yemen                              | 155 (109-204)             |                                | 4 (3-6)                           |                                        | 49 (14-80)                 |                                 | 1 (0-2)                            |                                         | 0 (0-1)              |                           | 0 (0-0)                      | 0 (0-0)                           |
| 2008 | Yemen                              | 146 (103-192)             |                                | 4 (3-5)                           |                                        | 46 (13-76)                 |                                 | 1 (0-2)                            |                                         | 0 (0-1)              |                           | 0 (0-0)                      | 0 (0-0)                           |
| 2009 | Yemen                              | 140 (99-184)              |                                | 4 (3-5)                           |                                        | 45 (13-73)                 |                                 | 1 (0-2)                            |                                         | 0 (0-1)              |                           | 0 (0-0)                      | 0 (0-0)                           |
| 2010 | Yemen                              | 12 (8-15)                 |                                | 0 (0-0)                           |                                        | 4 (1-6)                    |                                 | 0 (0-0)                            |                                         | 0 (0-0)              |                           | 0 (0-0)                      | 0 (0-0)                           |
| 2011 | Yemen                              | 11 (8-14)                 |                                | 0 (0-0)                           |                                        | 3 (1-6)                    |                                 | 0 (0-0)                            |                                         | 0 (0-0)              |                           | 0 (0-0)                      | 0 (0-0)                           |
| 2012 | Yemen                              | 10 (7-14)                 |                                | 0 (0-0)                           |                                        | 3 (1-6)                    |                                 | 0 (0-0)                            |                                         | 0 (0-0)              |                           | 0 (0-0)                      | 0 (0-0)                           |
| 2013 | Yemen                              | 10 (7-13)                 |                                | 0 (0-0)                           |                                        | 3 (1-5)                    |                                 | 0 (0-0)                            |                                         | 0 (0-0)              |                           | 0 (0-0)                      | 0 (0-0)                           |
| 2014 | Yemen                              | 9 (7-12)                  |                                | 0 (0-0)                           |                                        | 3 (1-5)                    |                                 | 0 (0-0)                            |                                         | 0 (0-0)              |                           | 0 (0-0)                      | 0 (0-0)                           |
| 2015 | Yemen                              | 9 (6-12)                  | 0 (0-0)                        | 0 (0-0)                           | 0 (0-0)                                | 3 (1-5)                    | 0 (0-0)                         | 0 (0-0)                            | 0 (0-0)                                 | 0 (0-0)              | 0 (0-0)                   | 0 (0-0)                      | 0 (0-0)                           |
| 2000 | Zambia                             | 1781 (1253-2340)          |                                | 94 (66-124)                       |                                        | 644 (355-911)              |                                 | 34 (19-48)                         |                                         | 3 (1-4)              |                           | 0 (0-0)                      | 0 (0-0)                           |
| 2001 | Zambia                             | 1731 (1217-2274)          |                                | 89 (62-117)                       |                                        | 621 (345-876)              |                                 | 32 (18-45)                         |                                         | 3 (1-4)              |                           | 0 (0-0)                      | 0 (0-0)                           |
| 2002 | Zambia                             | 1649 (1160-2167)          |                                | 82 (58-108)                       |                                        | 587 (243-903)              |                                 | 29 (12-45)                         |                                         | 2 (1-4)              |                           | 0 (0-0)                      | 0 (0-0)                           |
| 2003 | Zambia                             | 1565 (1101-2056)          |                                | 76 (53-100)                       |                                        | 552 (229-850)              |                                 | 27 (11-41)                         |                                         | 2 (1-3)              |                           | 0 (0-0)                      | 0 (0-0)                           |
| 2004 | Zambia                             | 245 (173-322)             |                                | 12 (8-15)                         |                                        | 86 (36-132)                |                                 | 4 (2-6)                            |                                         | 0 (0-1)              |                           | 0 (0-0)                      | 0 (0-0)                           |
| 2005 | Zambia                             | 137 (96-180)              |                                | 6 (4-8)                           |                                        | 48 (20-73)                 |                                 | 2 (1-3)                            |                                         | 0 (0-0)              |                           | 0 (0-0)                      | 0 (0-0)                           |
| 2006 | Zambia                             | 136 (96-179)              |                                | 6 (4-8)                           |                                        | 47 (19-72)                 |                                 | 2 (1-3)                            |                                         | 0                    |                           |                              |                                   |

| Year | Country  | Hib pneumonia deaths (UR) | Hib pneumonia deaths, HIV (UR) | Hib pneumonia mortality rate (UR) | Hib pneumonia mortality rate, HIV (UR) | Hib meningitis deaths (UR) | Hib meningitis deaths, HIV (UR) | Hib meningitis mortality rate (UR) | Hib meningitis mortality rate, HIV (UR) | Hib NPNM deaths (UR) | Hib NPNM deaths, HIV (UR) | Hib NPNM mortality rate (UR) | Hib NPNM mortality rate, HIV (UR) |
|------|----------|---------------------------|--------------------------------|-----------------------------------|----------------------------------------|----------------------------|---------------------------------|------------------------------------|-----------------------------------------|----------------------|---------------------------|------------------------------|-----------------------------------|
| 2007 | Zambia   | 137 (96-180)              |                                | 6 (4-8)                           |                                        | 46 (19-72)                 |                                 | 2 (1-3)                            |                                         | 0 (0-0)              |                           | 0 (0-0)                      |                                   |
| 2008 | Zambia   | 119 (84-157)              |                                | 5 (4-7)                           |                                        | 40 (16-61)                 |                                 | 2 (1-3)                            |                                         | 0 (0-0)              |                           | 0 (0-0)                      |                                   |
| 2009 | Zambia   | 14 (10-18)                |                                | 1 (0-1)                           |                                        | 4 (2-7)                    |                                 | 0 (0-0)                            |                                         | 0 (0-0)              |                           | 0 (0-0)                      |                                   |
| 2010 | Zambia   | 13 (9-18)                 |                                | 1 (0-1)                           |                                        | 4 (2-7)                    |                                 | 0 (0-0)                            |                                         | 0 (0-0)              |                           | 0 (0-0)                      |                                   |
| 2011 | Zambia   | 13 (9-17)                 |                                | 1 (0-1)                           |                                        | 4 (2-6)                    |                                 | 0 (0-0)                            |                                         | 0 (0-0)              |                           | 0 (0-0)                      |                                   |
| 2012 | Zambia   | 13 (9-16)                 |                                | 0 (0-1)                           |                                        | 4 (2-6)                    |                                 | 0 (0-0)                            |                                         | 0 (0-0)              |                           | 0 (0-0)                      |                                   |
| 2013 | Zambia   | 12 (8-16)                 |                                | 0 (0-1)                           |                                        | 4 (1-6)                    |                                 | 0 (0-0)                            |                                         | 0 (0-0)              |                           | 0 (0-0)                      |                                   |
| 2014 | Zambia   | 12 (8-15)                 |                                | 0 (0-1)                           |                                        | 4 (1-6)                    |                                 | 0 (0-0)                            |                                         | 0 (0-0)              |                           | 0 (0-0)                      |                                   |
| 2015 | Zambia   | 12 (8-15)                 | 0 (0-1)                        | 0 (0-1)                           | 0 (0-0)                                | 4 (1-6)                    | 0 (0-0)                         | 0 (0-0)                            | 0 (0-0)                                 | 0 (0-0)              | 0 (0-0)                   | 0 (0-0)                      | 0 (0-0)                           |
| 2000 | Zimbabwe | 745 (524-979)             |                                | 41 (29-54)                        |                                        | 267 (76-442)               |                                 | 15 (4-24)                          |                                         | 1 (0-2)              |                           | 0 (0-0)                      |                                   |
| 2001 | Zimbabwe | 767 (540-1008)            |                                | 42 (30-55)                        |                                        | 278 (79-460)               |                                 | 15 (4-25)                          |                                         | 1 (0-2)              |                           | 0 (0-0)                      |                                   |
| 2002 | Zimbabwe | 801 (563-1052)            |                                | 44 (31-57)                        |                                        | 296 (84-489)               |                                 | 16 (5-27)                          |                                         | 1 (0-2)              |                           | 0 (0-0)                      |                                   |
| 2003 | Zimbabwe | 841 (592-1105)            |                                | 45 (32-60)                        |                                        | 318 (91-526)               |                                 | 17 (5-28)                          |                                         | 1 (0-2)              |                           | 0 (0-0)                      |                                   |
| 2004 | Zimbabwe | 891 (627-1171)            |                                | 48 (33-62)                        |                                        | 345 (98-571)               |                                 | 18 (5-30)                          |                                         | 1 (0-2)              |                           | 0 (0-0)                      |                                   |
| 2005 | Zimbabwe | 946 (665-1243)            |                                | 50 (35-65)                        |                                        | 376 (107-622)              |                                 | 20 (6-33)                          |                                         | 2 (0-3)              |                           | 0 (0-0)                      |                                   |
| 2006 | Zimbabwe | 991 (697-1302)            |                                | 51 (36-67)                        |                                        | 402 (115-665)              |                                 | 21 (6-34)                          |                                         | 2 (0-3)              |                           | 0 (0-0)                      |                                   |
| 2007 | Zimbabwe | 1037 (729-1362)           |                                | 52 (37-68)                        |                                        | 426 (127-700)              |                                 | 21 (6-35)                          |                                         | 2 (1-3)              |                           | 0 (0-0)                      |                                   |
| 2008 | Zimbabwe | 244 (171-320)             |                                | 12 (8-16)                         |                                        | 101 (32-165)               |                                 | 5 (2-8)                            |                                         | 0 (0-1)              |                           | 0 (0-0)                      |                                   |
| 2009 | Zimbabwe | 121 (85-159)              |                                | 6 (4-8)                           |                                        | 50 (16-81)                 |                                 | 2 (1-4)                            |                                         | 0 (0-0)              |                           | 0 (0-0)                      |                                   |
| 2010 | Zimbabwe | 90 (63-118)               |                                | 4 (3-5)                           |                                        | 37 (13-60)                 |                                 | 2 (1-3)                            |                                         | 0 (0-0)              |                           | 0 (0-0)                      |                                   |
| 2011 | Zimbabwe | 83 (58-109)               |                                | 4 (3-5)                           |                                        | 34 (12-55)                 |                                 | 2 (1-2)                            |                                         | 0 (0-0)              |                           | 0 (0-0)                      |                                   |
| 2012 | Zimbabwe | 75 (53-98)                |                                | 3 (2-4)                           |                                        | 30 (11-49)                 |                                 | 1 (0-2)                            |                                         | 0 (0-0)              |                           | 0 (0-0)                      |                                   |
| 2013 | Zimbabwe | 11 (8-14)                 |                                | 0 (0-1)                           |                                        | 4 (1-7)                    |                                 | 0 (0-0)                            |                                         | 0 (0-0)              |                           | 0 (0-0)                      |                                   |
| 2014 | Zimbabwe | 11 (8-14)                 |                                | 0 (0-1)                           |                                        | 4 (1-7)                    |                                 | 0 (0-0)                            |                                         | 0 (0-0)              |                           | 0 (0-0)                      |                                   |
| 2015 | Zimbabwe | 11 (8-14)                 | 1 (0-1)                        | 0 (0-1)                           | 0 (0-0)                                | 4 (1-7)                    | 0 (0-0)                         | 0 (0-0)                            | 0 (0-0)                                 | 0 (0-0)              | 0 (0-0)                   | 0 (0-0)                      | 0 (0-0)                           |















| Year | Country   | San. pneumonia cases (100k pop) | San. pneumonia cases, HIV (100k pop) | San. pneumonia incidence (100k pop) | San. pneumonia incidence rate, HIV (100k pop) | San. pneumonia cases (100k pop) | San. pneumonia cases, HIV (100k pop) | San. pneumonia incidence (100k pop) | San. pneumonia incidence rate, HIV (100k pop) | San. pneumonia cases (100k pop) | San. pneumonia cases, HIV (100k pop) | San. pneumonia incidence (100k pop) | San. pneumonia incidence rate, HIV (100k pop) | San. pneumonia cases (100k pop) | San. pneumonia cases, HIV (100k pop) | San. pneumonia incidence (100k pop) | San. pneumonia incidence rate, HIV (100k pop) | San. pneumonia cases (100k pop) | San. pneumonia cases, HIV (100k pop) | San. pneumonia incidence (100k pop) | San. pneumonia incidence rate, HIV (100k pop) | San. pneumonia cases (100k pop) | San. pneumonia cases, HIV (100k pop) | San. pneumonia incidence (100k pop) | San. pneumonia incidence rate, HIV (100k pop) |
|------|-----------|---------------------------------|--------------------------------------|-------------------------------------|-----------------------------------------------|---------------------------------|--------------------------------------|-------------------------------------|-----------------------------------------------|---------------------------------|--------------------------------------|-------------------------------------|-----------------------------------------------|---------------------------------|--------------------------------------|-------------------------------------|-----------------------------------------------|---------------------------------|--------------------------------------|-------------------------------------|-----------------------------------------------|---------------------------------|--------------------------------------|-------------------------------------|-----------------------------------------------|
| 2000 | Guatemala | 200                             | 200                                  | 200                                 | 200                                           | 200                             | 200                                  | 200                                 | 200                                           | 200                             | 200                                  | 200                                 | 200                                           | 200                             | 200                                  | 200                                 | 200                                           | 200                             | 200                                  | 200                                 | 200                                           | 200                             | 200                                  | 200                                 | 200                                           |
| 2001 | Guatemala | 200                             | 200                                  | 200                                 | 200                                           | 200                             | 200                                  | 200                                 | 200                                           | 200                             | 200                                  | 200                                 | 200                                           | 200                             | 200                                  | 200                                 | 200                                           | 200                             | 200                                  | 200                                 | 200                                           | 200                             | 200                                  | 200                                 | 200                                           |
| 2002 | Guatemala | 200                             | 200                                  | 200                                 | 200                                           | 200                             | 200                                  | 200                                 | 200                                           | 200                             | 200                                  | 200                                 | 200                                           | 200                             | 200                                  | 200                                 | 200                                           | 200                             | 200                                  | 200                                 | 200                                           | 200                             | 200                                  | 200                                 | 200                                           |
| 2003 | Guatemala | 200                             | 200                                  | 200                                 | 200                                           | 200                             | 200                                  | 200                                 | 200                                           | 200                             | 200                                  | 200                                 | 200                                           | 200                             | 200                                  | 200                                 | 200                                           | 200                             | 200                                  | 200                                 | 200                                           | 200                             | 200                                  | 200                                 | 200                                           |
| 2004 | Guatemala | 200                             | 200                                  | 200                                 | 200                                           | 200                             | 200                                  | 200                                 | 200                                           | 200                             | 200                                  | 200                                 | 200                                           | 200                             | 200                                  | 200                                 | 200                                           | 200                             | 200                                  | 200                                 | 200                                           | 200                             | 200                                  | 200                                 | 200                                           |
| 2005 | Guatemala | 200                             | 200                                  | 200                                 | 200                                           | 200                             | 200                                  | 200                                 | 200                                           | 200                             | 200                                  | 200                                 | 200                                           | 200                             | 200                                  | 200                                 | 200                                           | 200                             | 200                                  | 200                                 | 200                                           | 200                             | 200                                  | 200                                 | 200                                           |
| 2006 | Guatemala | 200                             | 200                                  | 200                                 | 200                                           | 200                             | 200                                  | 200                                 | 200                                           | 200                             | 200                                  | 200                                 | 200                                           | 200                             | 200                                  | 200                                 | 200                                           | 200                             | 200                                  | 200                                 | 200                                           | 200                             | 200                                  | 200                                 | 200                                           |
| 2007 | Guatemala | 200                             | 200                                  | 200                                 | 200                                           | 200                             | 200                                  | 200                                 | 200                                           | 200                             | 200                                  | 200                                 | 200                                           | 200                             | 200                                  | 200                                 | 200                                           | 200                             | 200                                  | 200                                 | 200                                           | 200                             | 200                                  | 200                                 | 200                                           |
| 2008 | Guatemala | 200                             | 200                                  | 200                                 | 200                                           | 200                             | 200                                  | 200                                 | 200                                           | 200                             | 200                                  | 200                                 | 200                                           | 200                             | 200                                  | 200                                 | 200                                           | 200                             | 200                                  | 200                                 | 200                                           | 200                             | 200                                  | 200                                 | 200                                           |
| 2009 | Guatemala | 200                             | 200                                  | 200                                 | 200                                           | 200                             | 200                                  | 200                                 | 200                                           | 200                             | 200                                  | 200                                 | 200                                           | 200                             | 200                                  | 200                                 | 200                                           | 200                             | 200                                  | 200                                 | 200                                           | 200                             | 200                                  | 200                                 | 200                                           |
| 2010 | Guatemala | 200                             | 200                                  | 200                                 | 200                                           | 200                             | 200                                  | 200                                 | 200                                           | 200                             | 200                                  | 200                                 | 200                                           | 200                             | 200                                  | 200                                 | 200                                           | 200                             | 200                                  | 200                                 | 200                                           | 200                             | 200                                  | 200                                 | 200                                           |
| 2011 | Guatemala | 200                             | 200                                  | 200                                 | 200                                           | 200                             | 200                                  | 200                                 | 200                                           | 200                             | 200                                  | 200                                 | 200                                           | 200                             | 200                                  | 200                                 | 200                                           | 200                             | 200                                  | 200                                 | 200                                           | 200                             | 200                                  | 200                                 | 200                                           |
| 2012 | Guatemala | 200                             | 200                                  | 200                                 | 200                                           | 200                             | 200                                  | 200                                 | 200                                           | 200                             | 200                                  | 200                                 | 200                                           | 200                             | 200                                  | 200                                 | 200                                           | 200                             | 200                                  | 200                                 | 200                                           | 200                             | 200                                  | 200                                 | 200                                           |
| 2013 | Guatemala | 200                             | 200                                  | 200                                 | 200                                           | 200                             | 200                                  | 200                                 | 200                                           | 200                             | 200                                  | 200                                 | 200                                           | 200                             | 200                                  | 200                                 | 200                                           | 200                             | 200                                  | 200                                 | 200                                           | 200                             | 200                                  | 200                                 | 200                                           |
| 2014 | Guatemala | 200                             | 200                                  | 200                                 | 200                                           | 200                             | 200                                  | 200                                 | 200                                           | 200                             | 200                                  | 200                                 | 200                                           | 200                             | 200                                  | 200                                 | 200                                           | 200                             | 200                                  | 200                                 | 200                                           | 200                             | 200                                  | 200                                 | 200                                           |
| 2015 | Guatemala | 200                             | 200                                  | 200                                 | 200                                           | 200                             | 200                                  | 200                                 | 200                                           | 200                             | 200                                  | 200                                 | 200                                           | 200                             | 200                                  | 200                                 | 200                                           | 200                             | 200                                  | 200                                 | 200                                           | 200                             | 200                                  | 200                                 | 200                                           |

San = Streptococcus pneumoniae, npsm = non-pneumonia, non-meningitis, HIV = cases only in HIV-affected children. Uncertainty range provided in parentheses.

























| Year | Country  | Spn pneumonia cases (95% CrI) | Spn pneumonia cases, HIV (95% CrI) | Spn pneumonia incidence rate, HIV (95% CrI) | Spn pneumonia incidence rate, non-HIV (95% CrI) | Spn severe pneumonia cases (95% CrI) | Spn severe pneumonia cases, HIV (95% CrI) | Spn severe pneumonia incidence rate, HIV (95% CrI) | Spn severe pneumonia incidence rate, non-HIV (95% CrI) | Spn meningitis cases, HIV (95% CrI) | Spn meningitis incidence rate, HIV (95% CrI) | Spn meningitis incidence rate, non-HIV (95% CrI) | Spn NPMW cases, HIV (95% CrI) | Spn NPMW incidence rate, HIV (95% CrI) | Spn NPMW incidence rate, non-HIV (95% CrI) | Spn NPMW non-severe cases, HIV (95% CrI) | Spn NPMW non-severe incidence rate, HIV (95% CrI) | Spn NPMW non-severe cases, non-HIV (95% CrI) | Spn NPMW non-severe incidence rate, non-HIV (95% CrI) |
|------|----------|-------------------------------|------------------------------------|---------------------------------------------|-------------------------------------------------|--------------------------------------|-------------------------------------------|----------------------------------------------------|--------------------------------------------------------|-------------------------------------|----------------------------------------------|--------------------------------------------------|-------------------------------|----------------------------------------|--------------------------------------------|------------------------------------------|---------------------------------------------------|----------------------------------------------|-------------------------------------------------------|
| 2001 | Viet Nam | 451 (107-605)                 |                                    |                                             |                                                 | 451 (107-605)                        |                                           |                                                    |                                                        | 451 (107-605)                       |                                              |                                                  |                               |                                        |                                            |                                          |                                                   |                                              |                                                       |
| 2002 | Viet Nam | 446 (104-647)                 |                                    |                                             |                                                 | 446 (104-647)                        |                                           |                                                    |                                                        | 446 (104-647)                       |                                              |                                                  |                               |                                        |                                            |                                          |                                                   |                                              |                                                       |
| 2003 | Viet Nam | 520 (225-799)                 |                                    |                                             |                                                 | 520 (225-799)                        |                                           |                                                    |                                                        | 520 (225-799)                       |                                              |                                                  |                               |                                        |                                            |                                          |                                                   |                                              |                                                       |
| 2004 | Viet Nam | 591 (214-1300)                |                                    |                                             |                                                 | 591 (214-1300)                       |                                           |                                                    |                                                        | 591 (214-1300)                      |                                              |                                                  |                               |                                        |                                            |                                          |                                                   |                                              |                                                       |
| 2005 | Viet Nam | 645 (251-1460)                |                                    |                                             |                                                 | 645 (251-1460)                       |                                           |                                                    |                                                        | 645 (251-1460)                      |                                              |                                                  |                               |                                        |                                            |                                          |                                                   |                                              |                                                       |
| 2006 | Viet Nam | 660 (284-1487)                |                                    |                                             |                                                 | 660 (284-1487)                       |                                           |                                                    |                                                        | 660 (284-1487)                      |                                              |                                                  |                               |                                        |                                            |                                          |                                                   |                                              |                                                       |
| 2007 | Viet Nam | 641 (254-1436)                |                                    |                                             |                                                 | 641 (254-1436)                       |                                           |                                                    |                                                        | 641 (254-1436)                      |                                              |                                                  |                               |                                        |                                            |                                          |                                                   |                                              |                                                       |
| 2008 | Viet Nam | 574 (215-1300)                |                                    |                                             |                                                 | 574 (215-1300)                       |                                           |                                                    |                                                        | 574 (215-1300)                      |                                              |                                                  |                               |                                        |                                            |                                          |                                                   |                                              |                                                       |
| 2009 | Viet Nam | 511 (183-1181)                |                                    |                                             |                                                 | 511 (183-1181)                       |                                           |                                                    |                                                        | 511 (183-1181)                      |                                              |                                                  |                               |                                        |                                            |                                          |                                                   |                                              |                                                       |
| 2010 | Viet Nam | 776 (285-1810)                |                                    |                                             |                                                 | 776 (285-1810)                       |                                           |                                                    |                                                        | 776 (285-1810)                      |                                              |                                                  |                               |                                        |                                            |                                          |                                                   |                                              |                                                       |
| 2011 | Viet Nam | 803 (281-1824)                |                                    |                                             |                                                 | 803 (281-1824)                       |                                           |                                                    |                                                        | 803 (281-1824)                      |                                              |                                                  |                               |                                        |                                            |                                          |                                                   |                                              |                                                       |
| 2012 | Viet Nam | 881 (297-2064)                |                                    |                                             |                                                 | 881 (297-2064)                       |                                           |                                                    |                                                        | 881 (297-2064)                      |                                              |                                                  |                               |                                        |                                            |                                          |                                                   |                                              |                                                       |
| 2013 | Viet Nam | 843 (312-1930)                |                                    |                                             |                                                 | 843 (312-1930)                       |                                           |                                                    |                                                        | 843 (312-1930)                      |                                              |                                                  |                               |                                        |                                            |                                          |                                                   |                                              |                                                       |
| 2014 | Viet Nam | 886 (304-1991)                |                                    |                                             |                                                 | 886 (304-1991)                       |                                           |                                                    |                                                        | 886 (304-1991)                      |                                              |                                                  |                               |                                        |                                            |                                          |                                                   |                                              |                                                       |
| 2015 | Viet Nam | 922 (337-2020)                |                                    |                                             |                                                 | 922 (337-2020)                       |                                           |                                                    |                                                        | 922 (337-2020)                      |                                              |                                                  |                               |                                        |                                            |                                          |                                                   |                                              |                                                       |
| 2001 | Yemen    | 134841 (11344-160288)         | 1663 (436-1977)                    | 1771 (1528-2100)                            | 22 (10-28)                                      | 92478 (82014-10882)                  | 847 4895 7386                             | 699 (616-788)                                      | 9 (0-10)                                               | 922 (337-2020)                      | 13 (0-20)                                    | 10 (0-20)                                        | 13 (0-20)                     | 13 (0-20)                              | 13 (0-20)                                  | 13 (0-20)                                | 34 (15-78)                                        | 107 (40-200)                                 | 0 (0-1)                                               |
| 2002 | Yemen    | 44143 (38414-51190)           |                                    | 1461 (1324-1614)                            |                                                 | 17428 (13855-19164)                  |                                           | 560 (318-944)                                      |                                                        |                                     |                                              |                                                  |                               |                                        |                                            |                                          |                                                   |                                              |                                                       |
| 2003 | Yemen    |                               |                                    |                                             |                                                 |                                      |                                           |                                                    |                                                        |                                     |                                              |                                                  |                               |                                        |                                            |                                          |                                                   |                                              |                                                       |
| 2004 | Yemen    |                               |                                    |                                             |                                                 |                                      |                                           |                                                    |                                                        |                                     |                                              |                                                  |                               |                                        |                                            |                                          |                                                   |                                              |                                                       |
| 2005 | Yemen    |                               |                                    |                                             |                                                 |                                      |                                           |                                                    |                                                        |                                     |                                              |                                                  |                               |                                        |                                            |                                          |                                                   |                                              |                                                       |
| 2006 | Yemen    |                               |                                    |                                             |                                                 |                                      |                                           |                                                    |                                                        |                                     |                                              |                                                  |                               |                                        |                                            |                                          |                                                   |                                              |                                                       |
| 2007 | Yemen    |                               |                                    |                                             |                                                 |                                      |                                           |                                                    |                                                        |                                     |                                              |                                                  |                               |                                        |                                            |                                          |                                                   |                                              |                                                       |
| 2008 | Yemen    |                               |                                    |                                             |                                                 |                                      |                                           |                                                    |                                                        |                                     |                                              |                                                  |                               |                                        |                                            |                                          |                                                   |                                              |                                                       |
| 2009 | Yemen    |                               |                                    |                                             |                                                 |                                      |                                           |                                                    |                                                        |                                     |                                              |                                                  |                               |                                        |                                            |                                          |                                                   |                                              |                                                       |
| 2010 | Yemen    |                               |                                    |                                             |                                                 |                                      |                                           |                                                    |                                                        |                                     |                                              |                                                  |                               |                                        |                                            |                                          |                                                   |                                              |                                                       |
| 2011 | Yemen    |                               |                                    |                                             |                                                 |                                      |                                           |                                                    |                                                        |                                     |                                              |                                                  |                               |                                        |                                            |                                          |                                                   |                                              |                                                       |
| 2012 | Yemen    |                               |                                    |                                             |                                                 |                                      |                                           |                                                    |                                                        |                                     |                                              |                                                  |                               |                                        |                                            |                                          |                                                   |                                              |                                                       |
| 2013 | Yemen    |                               |                                    |                                             |                                                 |                                      |                                           |                                                    |                                                        |                                     |                                              |                                                  |                               |                                        |                                            |                                          |                                                   |                                              |                                                       |
| 2014 | Yemen    |                               |                                    |                                             |                                                 |                                      |                                           |                                                    |                                                        |                                     |                                              |                                                  |                               |                                        |                                            |                                          |                                                   |                                              |                                                       |
| 2015 | Yemen    | 23430 (20223-27882)           | 52 (40-62)                         | 607 (624-722)                               | 1 (0-2)                                         | 9197 (8881-10490)                    | 20 (10-23)                                | 238 (179-272)                                      | 1 (0-1)                                                |                                     |                                              |                                                  |                               |                                        |                                            |                                          |                                                   |                                              |                                                       |
| 2001 | Zambia   | 61470 (50307-73070)           |                                    | 3300 (2813-3876)                            |                                                 | 34037 (30620-37417)                  |                                           | 1275 (925-1654)                                    |                                                        |                                     |                                              |                                                  |                               |                                        |                                            |                                          |                                                   |                                              |                                                       |
| 2002 | Zambia   |                               |                                    |                                             |                                                 |                                      |                                           |                                                    |                                                        |                                     |                                              |                                                  |                               |                                        |                                            |                                          |                                                   |                                              |                                                       |
| 2003 | Zambia   |                               |                                    |                                             |                                                 |                                      |                                           |                                                    |                                                        |                                     |                                              |                                                  |                               |                                        |                                            |                                          |                                                   |                                              |                                                       |
| 2004 | Zambia   |                               |                                    |                                             |                                                 |                                      |                                           |                                                    |                                                        |                                     |                                              |                                                  |                               |                                        |                                            |                                          |                                                   |                                              |                                                       |
| 2005 | Zambia   |                               |                                    |                                             |                                                 |                                      |                                           |                                                    |                                                        |                                     |                                              |                                                  |                               |                                        |                                            |                                          |                                                   |                                              |                                                       |
| 2006 | Zambia   |                               |                                    |                                             |                                                 |                                      |                                           |                                                    |                                                        |                                     |                                              |                                                  |                               |                                        |                                            |                                          |                                                   |                                              |                                                       |
| 2007 | Zambia   |                               |                                    |                                             |                                                 |                                      |                                           |                                                    |                                                        |                                     |                                              |                                                  |                               |                                        |                                            |                                          |                                                   |                                              |                                                       |
| 2008 | Zambia   |                               |                                    |                                             |                                                 |                                      |                                           |                                                    |                                                        |                                     |                                              |                                                  |                               |                                        |                                            |                                          |                                                   |                                              |                                                       |
| 2009 | Zambia   |                               |                                    |                                             |                                                 |                                      |                                           |                                                    |                                                        |                                     |                                              |                                                  |                               |                                        |                                            |                                          |                                                   |                                              |                                                       |
| 2010 | Zambia   |                               |                                    |                                             |                                                 |                                      |                                           |                                                    |                                                        |                                     |                                              |                                                  |                               |                                        |                                            |                                          |                                                   |                                              |                                                       |
| 2011 | Zambia   |                               |                                    |                                             |                                                 |                                      |                                           |                                                    |                                                        |                                     |                                              |                                                  |                               |                                        |                                            |                                          |                                                   |                                              |                                                       |
| 2012 | Zambia   |                               |                                    |                                             |                                                 |                                      |                                           |                                                    |                                                        |                                     |                                              |                                                  |                               |                                        |                                            |                                          |                                                   |                                              |                                                       |
| 2013 | Zambia   |                               |                                    |                                             |                                                 |                                      |                                           |                                                    |                                                        |                                     |                                              |                                                  |                               |                                        |                                            |                                          |                                                   |                                              |                                                       |
| 2014 | Zambia   |                               |                                    |                                             |                                                 |                                      |                                           |                                                    |                                                        |                                     |                                              |                                                  |                               |                                        |                                            |                                          |                                                   |                                              |                                                       |
| 2015 | Zambia   | 39873 (34034-47388)           | 6463 (6185-1248)                   | 1422 (1227-1601)                            | 337 (291-401)                                   | 10500 (11001-11700)                  | 3701 (3772-4321)                          | 100 867 6236                                       | 122 (86-151)                                           |                                     |                                              |                                                  |                               |                                        |                                            |                                          |                                                   |                                              |                                                       |
| 2001 | Zimbabwe | 26170 (20841-34480)           |                                    | 2550 (2205-3037)                            |                                                 | 18008 (15300-20600)                  |                                           | 1000 (749-1340)                                    |                                                        |                                     |                                              |                                                  |                               |                                        |                                            |                                          |                                                   |                                              |                                                       |
| 2002 | Zimbabwe |                               |                                    |                                             |                                                 |                                      |                                           |                                                    |                                                        |                                     |                                              |                                                  |                               |                                        |                                            |                                          |                                                   |                                              |                                                       |
| 2003 | Zimbabwe |                               |                                    |                                             |                                                 |                                      |                                           |                                                    |                                                        |                                     |                                              |                                                  |                               |                                        |                                            |                                          |                                                   |                                              |                                                       |
| 2004 | Zimbabwe |                               |                                    |                                             |                                                 |                                      |                                           |                                                    |                                                        |                                     |                                              |                                                  |                               |                                        |                                            |                                          |                                                   |                                              |                                                       |
| 2005 | Zimbabwe |                               |                                    |                                             |                                                 |                                      |                                           |                                                    |                                                        |                                     |                                              |                                                  |                               |                                        |                                            |                                          |                                                   |                                              |                                                       |
| 2006 | Zimbabwe |                               |                                    |                                             |                                                 |                                      |                                           |                                                    |                                                        |                                     |                                              |                                                  |                               |                                        |                                            |                                          |                                                   |                                              |                                                       |
| 2007 | Zimbabwe |                               |                                    |                                             |                                                 |                                      |                                           |                                                    |                                                        |                                     |                                              |                                                  |                               |                                        |                                            |                                          |                                                   |                                              |                                                       |
| 2008 | Zimbabwe |                               |                                    |                                             |                                                 |                                      |                                           |                                                    |                                                        |                                     |                                              |                                                  |                               |                                        |                                            |                                          |                                                   |                                              |                                                       |
| 2009 | Zimbabwe |                               |                                    |                                             |                                                 |                                      |                                           |                                                    |                                                        |                                     |                                              |                                                  |                               |                                        |                                            |                                          |                                                   |                                              |                                                       |
| 2010 | Zimbabwe |                               |                                    |                                             |                                                 |                                      |                                           |                                                    |                                                        |                                     |                                              |                                                  |                               |                                        |                                            |                                          |                                                   |                                              |                                                       |
| 2011 | Zimbabwe |                               |                                    |                                             |                                                 |                                      |                                           |                                                    |                                                        |                                     |                                              |                                                  |                               |                                        |                                            |                                          |                                                   |                                              |                                                       |
| 2012 | Zimbabwe |                               |                                    |                                             |                                                 |                                      |                                           |                                                    |                                                        |                                     |                                              |                                                  |                               |                                        |                                            |                                          |                                                   |                                              |                                                       |
| 2013 | Zimbabwe |                               |                                    |                                             |                                                 |                                      |                                           |                                                    |                                                        |                                     |                                              |                                                  |                               |                                        |                                            |                                          |                                                   |                                              |                                                       |
| 2014 | Zimbabwe |                               |                                    |                                             |                                                 |                                      |                                           |                                                    |                                                        |                                     |                                              |                                                  |                               |                                        |                                            |                                          |                                                   |                                              |                                                       |
| 2015 | Zimbabwe | 23302 (20010-27080)           | 6702 (6783-7967)                   | 642 (615-1100)                              | 272 (230-313)                                   | 9090 (8810-10071)                    | 2627 (1988-2699)                          | 369 (277-421)                                      | 107 (80-122)                                           |                                     |                                              |                                                  |                               |                                        |                                            |                                          |                                                   |                                              |                                                       |

Spn = Streptococcus pneumoniae, npmw = non-pneumonia, non-meningitis, HIV = cases only in HIV-infected children. Uncertainty range provided in parentheses.

Table 10: Haemophilus influenzae type b morbidity by syndrome, country, and year

| Country | Year | Prevalence (1000)  |               |                | Incidence (1000) |               |                | Prevalence (1000) |               |                | Incidence (1000) |               |                | Prevalence (1000) |               |                | Incidence (1000) |  |  |
|---------|------|--------------------|---------------|----------------|------------------|---------------|----------------|-------------------|---------------|----------------|------------------|---------------|----------------|-------------------|---------------|----------------|------------------|--|--|
|         |      | All                | Non-pneumonia | Non-meningitis | All              | Non-pneumonia | Non-meningitis | All               | Non-pneumonia | Non-meningitis | All              | Non-pneumonia | Non-meningitis | All               | Non-pneumonia | Non-meningitis |                  |  |  |
| Albania | 2000 | 12308 (1158-20250) | 0 (0-0)       | 0 (0-0)        | 2327 (1957-4682) | 0 (0-0)       | 0 (0-0)        | 600 (269-1211)    | 0 (0-0)       | 0 (0-0)        | 3702 (334-5799)  | 0 (0-0)       | 0 (0-0)        | 658 (231-999)     | 0 (0-0)       | 0 (0-0)        |                  |  |  |
| Albania | 2001 |                    |               |                |                  |               |                |                   |               |                | 2712 (171-3719)  | 0 (0-0)       | 0 (0-0)        | 652 (224-999)     | 0 (0-0)       | 0 (0-0)        |                  |  |  |
| Albania | 2002 |                    |               |                |                  |               |                |                   |               |                | 2798 (1807-5932) | 0 (0-0)       | 0 (0-0)        | 654 (234-1021)    | 0 (0-0)       | 0 (0-0)        |                  |  |  |
| Albania | 2003 |                    |               |                |                  |               |                |                   |               |                | 3815 (1788-6091) | 0 (0-0)       | 0 (0-0)        | 655 (241-1026)    | 0 (0-0)       | 0 (0-0)        |                  |  |  |
| Albania | 2004 |                    |               |                |                  |               |                |                   |               |                | 3689 (1401-5922) | 0 (0-0)       | 0 (0-0)        | 654 (241-1026)    | 0 (0-0)       | 0 (0-0)        |                  |  |  |
| Albania | 2005 |                    |               |                |                  |               |                |                   |               |                | 3748 (1368-6027) | 0 (0-0)       | 0 (0-0)        | 652 (238-1025)    | 0 (0-0)       | 0 (0-0)        |                  |  |  |
| Albania | 2006 |                    |               |                |                  |               |                |                   |               |                | 3707 (1338-5786) | 0 (0-0)       | 0 (0-0)        | 658 (239-1026)    | 0 (0-0)       | 0 (0-0)        |                  |  |  |
| Albania | 2007 |                    |               |                |                  |               |                |                   |               |                | 3628 (1358-6026) | 0 (0-0)       | 0 (0-0)        | 79 (28-116)       | 0 (0-0)       | 0 (0-0)        |                  |  |  |
| Albania | 2008 |                    |               |                |                  |               |                |                   |               |                | 3227 (1265-6470) | 0 (0-0)       | 0 (0-0)        | 73 (27-110)       | 0 (0-0)       | 0 (0-0)        |                  |  |  |
| Albania | 2009 |                    |               |                |                  |               |                |                   |               |                | 1271 (465-1972)  | 0 (0-0)       | 0 (0-0)        | 21 (8-34)         | 0 (0-0)       | 0 (0-0)        |                  |  |  |
| Albania | 2010 |                    |               |                |                  |               |                |                   |               |                | 1401 (503-2301)  | 0 (0-0)       | 0 (0-0)        | 15 (5-17)         | 0 (0-0)       | 0 (0-0)        |                  |  |  |
| Albania | 2011 |                    |               |                |                  |               |                |                   |               |                | 172 (41-576)     | 0 (0-0)       | 0 (0-0)        | 64 (4-69)         | 0 (0-0)       | 0 (0-0)        |                  |  |  |
| Albania | 2012 |                    |               |                |                  |               |                |                   |               |                | 161 (45-278)     | 0 (0-0)       | 0 (0-0)        | 42 (2-49)         | 0 (0-0)       | 0 (0-0)        |                  |  |  |
| Albania | 2013 |                    |               |                |                  |               |                |                   |               |                | 329 (124-698)    | 0 (0-0)       | 0 (0-0)        | 7 (2-8)           | 0 (0-0)       | 0 (0-0)        |                  |  |  |
| Albania | 2014 |                    |               |                |                  |               |                |                   |               |                | 7 (10-4)         | 0 (0-0)       | 0 (0-0)        | 1 (0-1)           | 0 (0-0)       | 0 (0-0)        |                  |  |  |
| Albania | 2015 | 1130 (422-2830)    | 0 (0-0)       | 0 (0-0)        | 712 (377-927)    | 0 (0-0)       | 0 (0-0)        | 26 (10-26)        | 0 (0-0)       | 0 (0-0)        | 26 (10-26)       | 0 (0-0)       | 0 (0-0)        | 13 (2-18)         | 0 (0-0)       | 0 (0-0)        |                  |  |  |
| Albania | 2000 | 448 (97-2697)      | 0 (0-0)       | 0 (0-0)        | 142 (76-268)     | 0 (0-0)       | 0 (0-0)        | 30 (4-26)         | 0 (0-0)       | 0 (0-0)        | 11 (2-8)         | 0 (0-0)       | 13 (2-18)      | 0 (0-0)           | 0 (0-0)       |                |                  |  |  |
| Albania | 2001 |                    |               |                |                  |               |                |                   |               |                | 22 (2-26)        | 0 (0-0)       | 7 (1-6)        | 1 (0-1)           | 0 (0-0)       | 0 (0-0)        |                  |  |  |
| Albania | 2002 |                    |               |                |                  |               |                |                   |               |                | 14 (1-17)        | 0 (0-0)       | 2 (1-6)        | 1 (0-1)           | 0 (0-0)       | 0 (0-0)        |                  |  |  |
| Albania | 2003 |                    |               |                |                  |               |                |                   |               |                | 15 (1-21)        | 0 (0-0)       | 4 (0-4)        | 1 (0-1)           | 0 (0-0)       | 0 (0-0)        |                  |  |  |
| Albania | 2004 |                    |               |                |                  |               |                |                   |               |                | 10 (1-24)        | 0 (0-0)       | 5 (0-12)       | 2 (0-4)           | 0 (0-0)       | 0 (0-0)        |                  |  |  |
| Albania | 2005 |                    |               |                |                  |               |                |                   |               |                | 10 (1-21)        | 0 (0-0)       | 6 (1-12)       | 2 (0-7)           | 0 (0-0)       | 0 (0-0)        |                  |  |  |
| Albania | 2006 |                    |               |                |                  |               |                |                   |               |                | 3 (0-6)          | 0 (0-0)       | 1 (0-1)        | 0 (0-0)           | 0 (0-0)       | 0 (0-0)        |                  |  |  |
| Albania | 2007 |                    |               |                |                  |               |                |                   |               |                | 1 (0-2)          | 0 (0-0)       | 0 (0-0)        | 0 (0-0)           | 0 (0-0)       | 0 (0-0)        |                  |  |  |
| Albania | 2008 |                    |               |                |                  |               |                |                   |               |                | 1 (0-2)          | 0 (0-0)       | 0 (0-0)        | 0 (0-0)           | 0 (0-0)       | 0 (0-0)        |                  |  |  |
| Albania | 2009 |                    |               |                |                  |               |                |                   |               |                | 1 (0-2)          | 0 (0-0)       | 0 (0-0)        | 0 (0-0)           | 0 (0-0)       | 0 (0-0)        |                  |  |  |
| Albania | 2010 |                    |               |                |                  |               |                |                   |               |                | 1 (0-2)          | 0 (0-0)       | 0 (0-0)        | 0 (0-0)           | 0 (0-0)       | 0 (0-0)        |                  |  |  |
| Albania | 2011 |                    |               |                |                  |               |                |                   |               |                | 1 (0-2)          | 0 (0-0)       | 0 (0-0)        | 0 (0-0)           | 0 (0-0)       | 0 (0-0)        |                  |  |  |
| Albania | 2012 |                    |               |                |                  |               |                |                   |               |                | 1 (0-2)          | 0 (0-0)       | 0 (0-0)        | 0 (0-0)           | 0 (0-0)       | 0 (0-0)        |                  |  |  |
| Albania | 2013 |                    |               |                |                  |               |                |                   |               |                | 1 (0-2)          | 0 (0-0)       | 0 (0-0)        | 0 (0-0)           | 0 (0-0)       | 0 (0-0)        |                  |  |  |
| Albania | 2014 |                    |               |                |                  |               |                |                   |               |                | 1 (0-2)          | 0 (0-0)       | 0 (0-0)        | 0 (0-0)           | 0 (0-0)       | 0 (0-0)        |                  |  |  |
| Albania | 2015 | 3 (0-4)            | 0 (0-0)       | 0 (0-0)        | 1 (1-2)          | 0 (0-0)       | 0 (0-0)        | 0 (0-0)           | 0 (0-0)       | 0 (0-0)        | 0 (0-0)          | 0 (0-0)       | 0 (0-0)        | 0 (0-0)           | 0 (0-0)       | 0 (0-0)        |                  |  |  |
| Algeria | 2000 | 4272 (3908-6884)   | 0 (0-0)       | 0 (0-0)        | 1407 (1383-2299) | 0 (0-0)       | 0 (0-0)        | 265 (153-433)     | 0 (0-0)       | 0 (0-0)        | 245 (21-252)     | 0 (0-0)       | 0 (0-0)        | 73 (25-111)       | 0 (0-0)       | 0 (0-0)        |                  |  |  |
| Algeria | 2001 |                    |               |                |                  |               |                |                   |               |                | 235 (7-387)      | 0 (0-0)       | 4 (1-13)       | 7 (0-13)          | 0 (0-0)       | 0 (0-0)        |                  |  |  |
| Algeria | 2002 |                    |               |                |                  |               |                |                   |               |                | 246 (2-289)      | 0 (0-0)       | 4 (1-13)       | 7 (0-13)          | 0 (0-0)       | 0 (0-0)        |                  |  |  |
| Algeria | 2003 |                    |               |                |                  |               |                |                   |               |                | 216 (8-335)      | 0 (0-0)       | 7 (0-13)       | 7 (0-13)          | 0 (0-0)       | 0 (0-0)        |                  |  |  |
| Algeria | 2004 |                    |               |                |                  |               |                |                   |               |                | 217 (3-346)      | 0 (0-0)       | 7 (0-13)       | 7 (0-13)          | 0 (0-0)       | 0 (0-0)        |                  |  |  |
| Algeria | 2005 |                    |               |                |                  |               |                |                   |               |                | 209 (87-344)     | 0 (0-0)       | 7 (0-13)       | 7 (0-13)          | 0 (0-0)       | 0 (0-0)        |                  |  |  |
| Algeria | 2006 |                    |               |                |                  |               |                |                   |               |                | 216 (20-281)     | 0 (0-0)       | 7 (0-13)       | 7 (0-13)          | 0 (0-0)       | 0 (0-0)        |                  |  |  |
| Algeria | 2007 |                    |               |                |                  |               |                |                   |               |                | 230 (70-376)     | 0 (0-0)       | 7 (0-13)       | 7 (0-13)          | 0 (0-0)       | 0 (0-0)        |                  |  |  |
| Algeria | 2008 |                    |               |                |                  |               |                |                   |               |                | 28 (0-26)        | 0 (0-0)       | 10 (2-25)      | 7 (0-13)          | 0 (0-0)       | 0 (0-0)        |                  |  |  |
| Algeria | 2009 |                    |               |                |                  |               |                |                   |               |                | 20 (3-24)        | 0 (0-0)       | 1 (0-1)        | 7 (1-12)          | 0 (0-0)       | 0 (0-0)        |                  |  |  |
| Algeria | 2010 |                    |               |                |                  |               |                |                   |               |                | 21 (3-27)        | 0 (0-0)       | 1 (0-1)        | 7 (1-13)          | 0 (0-0)       | 0 (0-0)        |                  |  |  |
| Algeria | 2011 |                    |               |                |                  |               |                |                   |               |                | 22 (3-28)        | 0 (0-0)       | 1 (0-1)        | 7 (1-13)          | 0 (0-0)       | 0 (0-0)        |                  |  |  |
| Algeria | 2012 |                    |               |                |                  |               |                |                   |               |                | 21 (3-28)        | 0 (0-0)       | 1 (0-1)        | 7 (1-13)          | 0 (0-0)       | 0 (0-0)        |                  |  |  |
| Algeria | 2013 |                    |               |                |                  |               |                |                   |               |                | 21 (3-28)        | 0 (0-0)       | 1 (0-1)        | 7 (1-13)          | 0 (0-0)       | 0 (0-0)        |                  |  |  |
| Algeria | 2014 |                    |               |                |                  |               |                |                   |               |                | 1 (0-6)          | 0 (0-0)       | 0 (0-0)        | 1 (0-2)           | 0 (0-0)       | 0 (0-0)        |                  |  |  |
| Algeria | 2015 | 446 (443-720)      | 0 (0-0)       | 0 (0-0)        | 11 (70-58)       | 0 (0-0)       | 0 (0-0)        | 2 (1-4)           | 0 (0-0)       | 0 (0-0)        | 0 (0-0)          | 0 (0-0)       | 0 (0-0)        | 0 (0-0)           | 0 (0-0)       | 0 (0-0)        |                  |  |  |
| Andorra | 2000 | 0 (0-0)            | 0 (0-0)       | 0 (0-0)        | 0 (0-0)          | 0 (0-0)       | 0 (0-0)        | 0 (0-0)           | 0 (0-0)       | 0 (0-0)        | 0 (0-0)          | 0 (0-0)       | 0 (0-0)        | 0 (0-0)           | 0 (0-0)       | 0 (0-0)        |                  |  |  |
| Andorra | 2001 |                    |               |                |                  |               |                |                   |               |                | 0 (0-0)          | 0 (0-0)       | 0 (0-0)        | 0 (0-0)           | 0 (0-0)       | 0 (0-0)        |                  |  |  |
| Andorra | 2002 |                    |               |                |                  |               |                |                   |               |                | 0 (0-0)          | 0 (0-0)       | 0 (0-0)        | 0 (0-0)           | 0 (0-0)       | 0 (0-0)        |                  |  |  |
| Andorra | 2003 |                    |               |                |                  |               |                |                   |               |                | 0 (0-0)          | 0 (0-0)       | 0 (0-0)        | 0 (0-0)           | 0 (0-0)       | 0 (0-0)        |                  |  |  |
| Andorra | 2004 |                    |               |                |                  |               |                |                   |               |                | 0 (0-0)          | 0 (0-0)       | 0 (0-0)        | 0 (0-0)           | 0 (0-0)       | 0 (0-0)        |                  |  |  |
| Andorra | 2005 |                    |               |                |                  |               |                |                   |               |                | 0 (0-0)          | 0 (0-0)       | 0 (0-0)        | 0 (0-0)           | 0 (0-0)       | 0 (0-0)        |                  |  |  |
| Andorra | 2006 |                    |               |                |                  |               |                |                   |               |                | 0 (0-0)          | 0 (0-0)       | 0 (0-0)        | 0 (0-0)           | 0 (0-0)       | 0 (0-0)        |                  |  |  |
| Andorra | 2007 |                    |               |                |                  |               |                |                   |               |                | 0 (0-0)          | 0 (0-0)       | 0 (0-0)        | 0 (0-0)           | 0 (0-0)       | 0 (0-0)        |                  |  |  |
| Andorra | 2008 |                    |               |                |                  |               |                |                   |               |                | 0 (0-0)          | 0 (0-0)       | 0 (0-0)        | 0 (0-0)           | 0 (0-0)       | 0 (0-0)        |                  |  |  |
| Andorra | 2009 |                    |               |                |                  |               |                |                   |               |                | 0 (0-0)          | 0 (0-0)       | 0 (0-0)        | 0 (0-0)           | 0 (0-0)       | 0 (0-0)        |                  |  |  |
| Andorra | 2010 |                    |               |                |                  |               |                |                   |               |                | 0 (0-0)          | 0 (0-0)       | 0 (0-0)        | 0 (0-0)           | 0 (0-0)       | 0 (0-0)        |                  |  |  |
| Andorra | 2011 |                    |               |                |                  |               |                |                   |               |                | 0 (0-0)          | 0 (0-0)       | 0 (0-0)        | 0 (0-0)           | 0 (0-0)       | 0 (0-0)        |                  |  |  |
| Andorra | 2012 |                    |               |                |                  |               |                |                   |               |                | 0 (0-0)          | 0 (0-0)       | 0 (0-0)        | 0 (0-0)           | 0 (0-0)       | 0 (0-0)        |                  |  |  |
| Andorra | 2013 |                    |               |                |                  |               |                |                   |               |                | 0 (0-0)          | 0 (0-0)       | 0 (0-0)        | 0 (0-0)           | 0 (0-0)       | 0 (0-0)        |                  |  |  |
| Andorra | 2014 |                    |               |                |                  |               |                |                   |               |                | 0 (0-0)          | 0 (0-0)       | 0 (0-0)        | 0 (0-0)           | 0 (0-0)       | 0 (0-0)        |                  |  |  |
| Andorra | 2015 | 0 (0-0)            | 0 (0-0)       | 0 (0-0)        | 0 (0-0)          | 0 (0-0)       | 0 (0-0)        | 0 (0-0)           | 0 (0-0)       | 0 (0-0)        | 0 (0-0)          | 0 (0-0)       | 0 (0-0)        | 0 (0-0)           | 0 (0-0)       | 0 (0-0)        |                  |  |  |
| Angola  | 2000 | 4341 (3829-5142)   | 0 (0-0)       | 0 (0-0)        | 1481 (1324-2126) | 0 (0-0)       | 0 (0-0)        | 207 (127-324)     | 0 (0-0)       | 0 (0-0)        | 189 (80-281)     | 0 (0-0)       | 0 (0-0)        | 37 (15-61)        | 0 (0-0)       | 0 (0-0)        |                  |  |  |
| Angola  | 2001 |                    |               |                |                  |               |                |                   |               |                | 160 (88-260)     | 0 (0-0)       | 63 (29-84)     | 33 (15-61)        | 0 (0-0)       | 0 (0-0)        |                  |  |  |
| Angola  | 2002 |                    |               |                |                  |               |                |                   |               |                | 199 (93-299)     | 0 (0-0)       | 61 (29-84)     | 33 (15-61)        | 0 (0-0)       | 0 (0-0)        |                  |  |  |
| Angola  | 2003 |                    |               |                |                  |               |                |                   |               |                | 203 (95-303)     | 0 (0-0)       | 60 (28-84)     | 33 (15-61)        | 0 (0-0)       | 0 (0-0)        |                  |  |  |
| Angola  | 2004 |                    |               |                |                  |               |                |                   |               |                | 201 (94-303)     | 0 (0-0)       | 60 (28-84)     | 33 (15-61)        | 0 (0-0)       | 0 (0-0)        |                  |  |  |
| Angola  | 2005 |                    |               |                |                  |               |                |                   |               |                | 203 (95-303)     | 0 (0-0)       | 60 (28-84)     | 33 (15-61)        | 0 (0-0)       | 0 (0-0)        |                  |  |  |
| Angola  | 2006 |                    |               |                |                  |               |                |                   |               |                | 212 (97-313)     | 0 (0-0)       | 58 (27-81)     | 34 (16-54)        | 0 (0-0)       | 0 (0-0)        |                  |  |  |
| Angola  | 2007 |                    |               |                |                  |               |                |                   |               |                | 158 (68-258)     | 0 (0-0)       | 50 (21-71)     | 36 (18-54)        | 0 (0-0)       | 0 (0-0)        |                  |  |  |
| Angola  | 2008 |                    |               |                |                  |               |                |                   |               |                | 251 (13-379)     | 0 (0-0)       | 7 (3-15)       | 44 (20-65)        | 0 (0-0)       | 0 (0-0)        |                  |  |  |
| Angola  | 2009 |                    |               |                |                  |               |                |                   |               |                | 153 (13-225)     | 0 (0-0)       | 7 (3-15)       | 42 (22-71)        | 0 (0-0)       | 0 (0-0)        |                  |  |  |
| Angola  | 2010 |                    |               |                |                  |               |                |                   |               |                | 227 (18-336)     | 0 (0-0)       | 6 (2-6)        | 39 (20-65)        | 0 (0-0)       | 0 (0-0)        |                  |  |  |
| Angola  | 2011 |                    |               |                |                  |               |                |                   |               |                | 441 (15-564)     | 0 (0-0)       | 42 (20-65)     | 14 (8-11)         | 0 (0-0)       | 0 (0-0)        |                  |  |  |
| Angola  | 2012 |                    |               |                |                  |               |                |                   |               |                | 22 (10-22)       | 0 (0-0)       | 1 (0-1)        | 4 (2-4)           | 0 (0-0)       | 0 (0-0)        |                  |  |  |
| Angola  | 2013 |                    |               |                |                  |               |                |                   |               |                | 11 (10-22)       | 0 (0-0)       | 1 (0-1)        | 4 (2-4)           | 0 (0-0)       | 0 (0-0)        |                  |  |  |
| Angola  | 2014 |                    |               |                |                  |               |                |                   |               |                | 216 (98-335)     | 0 (0-0)       | 1 (0-1)        | 42 (20-65)        | 0 (0-0)       | 0 (0-0)        |                  |  |  |
| Angola  | 2015 | 4356 (3917-2117)   | 105 (85-171)  | 94 (86-153)    | 813 (687-1042)   | 20 (12-39)    | 18 (10-25)     | 252 (124-381)     | 6 (0-9)       | 6 (0-9)        | 23 (10-34)       | 0 (0-0)       | 45 (21-71)     | 11 (7-11)         | 0 (0-0)       | 0 (0-0)        |                  |  |  |







| Year | Country                  | 10 pneumonia cases (CI) | 10 pneumonia cases, HV (CI) | 10 pneumonia incidence rate (CI) | 10 pneumonia incidence rate, HV (CI) | 10 severe pneumonia cases (CI) | 10 severe pneumonia cases, HV (CI) | 10 severe pneumonia incidence rate (CI) | 10 severe pneumonia incidence rate, HV (CI) | 10 meningitis cases (CI) | 10 meningitis cases, HV (CI) | 10 meningitis incidence rate (CI) | 10 meningitis incidence rate, HV (CI) | 10 NPMR cases (CI) | 10 NPMR cases, HV (CI) | 10 NPMR incidence rate (CI) | 10 NPMR incidence rate, HV (CI) |
|------|--------------------------|-------------------------|-----------------------------|----------------------------------|--------------------------------------|--------------------------------|------------------------------------|-----------------------------------------|---------------------------------------------|--------------------------|------------------------------|-----------------------------------|---------------------------------------|--------------------|------------------------|-----------------------------|---------------------------------|
| 2010 | Chile                    | 10                      | 10                          | 10                               | 10                                   | 10                             | 10                                 | 10                                      | 10                                          | 10                       | 10                           | 10                                | 10                                    | 10                 | 10                     | 10                          | 10                              |
| 2011 | Chile                    | 10                      | 10                          | 10                               | 10                                   | 10                             | 10                                 | 10                                      | 10                                          | 10                       | 10                           | 10                                | 10                                    | 10                 | 10                     | 10                          | 10                              |
| 2012 | Chile                    | 10                      | 10                          | 10                               | 10                                   | 10                             | 10                                 | 10                                      | 10                                          | 10                       | 10                           | 10                                | 10                                    | 10                 | 10                     | 10                          | 10                              |
| 2013 | Chile                    | 10                      | 10                          | 10                               | 10                                   | 10                             | 10                                 | 10                                      | 10                                          | 10                       | 10                           | 10                                | 10                                    | 10                 | 10                     | 10                          | 10                              |
| 2014 | Chile                    | 10                      | 10                          | 10                               | 10                                   | 10                             | 10                                 | 10                                      | 10                                          | 10                       | 10                           | 10                                | 10                                    | 10                 | 10                     | 10                          | 10                              |
| 2015 | Chile                    | 10                      | 10                          | 10                               | 10                                   | 10                             | 10                                 | 10                                      | 10                                          | 10                       | 10                           | 10                                | 10                                    | 10                 | 10                     | 10                          | 10                              |
| 2000 | Central African Republic | 1338 (1400-1400)        | 0 (0-0)                     | 239 (0-231)                      | 1 (1-0)                              | 288 (114-581)                  | 0 (0-0)                            | 64 (0-20)                               | 0 (0-0)                                     | 29 (14-34)               | 49 (27-72)                   | 0 (0-0)                           | 0 (0-0)                               | 0 (0-0)            | 0 (0-0)                | 0 (0-0)                     | 0 (0-0)                         |
| 2001 | Central African Republic |                         |                             |                                  |                                      |                                |                                    |                                         |                                             | 29 (14-34)               | 49 (27-72)                   |                                   |                                       |                    |                        |                             |                                 |
| 2002 | Central African Republic |                         |                             |                                  |                                      |                                |                                    |                                         |                                             | 29 (14-34)               | 49 (27-72)                   |                                   |                                       |                    |                        |                             |                                 |
| 2003 | Central African Republic |                         |                             |                                  |                                      |                                |                                    |                                         |                                             | 29 (14-34)               | 49 (27-72)                   |                                   |                                       |                    |                        |                             |                                 |
| 2004 | Central African Republic |                         |                             |                                  |                                      |                                |                                    |                                         |                                             | 29 (14-34)               | 49 (27-72)                   |                                   |                                       |                    |                        |                             |                                 |
| 2005 | Central African Republic |                         |                             |                                  |                                      |                                |                                    |                                         |                                             | 29 (14-34)               | 49 (27-72)                   |                                   |                                       |                    |                        |                             |                                 |
| 2006 | Central African Republic |                         |                             |                                  |                                      |                                |                                    |                                         |                                             | 29 (14-34)               | 49 (27-72)                   |                                   |                                       |                    |                        |                             |                                 |
| 2007 | Central African Republic |                         |                             |                                  |                                      |                                |                                    |                                         |                                             | 29 (14-34)               | 49 (27-72)                   |                                   |                                       |                    |                        |                             |                                 |
| 2008 | Central African Republic |                         |                             |                                  |                                      |                                |                                    |                                         |                                             | 29 (14-34)               | 49 (27-72)                   |                                   |                                       |                    |                        |                             |                                 |
| 2009 | Central African Republic |                         |                             |                                  |                                      |                                |                                    |                                         |                                             | 29 (14-34)               | 49 (27-72)                   |                                   |                                       |                    |                        |                             |                                 |
| 2010 | Central African Republic |                         |                             |                                  |                                      |                                |                                    |                                         |                                             | 29 (14-34)               | 49 (27-72)                   |                                   |                                       |                    |                        |                             |                                 |
| 2011 | Central African Republic |                         |                             |                                  |                                      |                                |                                    |                                         |                                             | 29 (14-34)               | 49 (27-72)                   |                                   |                                       |                    |                        |                             |                                 |
| 2012 | Central African Republic |                         |                             |                                  |                                      |                                |                                    |                                         |                                             | 29 (14-34)               | 49 (27-72)                   |                                   |                                       |                    |                        |                             |                                 |
| 2013 | Central African Republic |                         |                             |                                  |                                      |                                |                                    |                                         |                                             | 29 (14-34)               | 49 (27-72)                   |                                   |                                       |                    |                        |                             |                                 |
| 2014 | Central African Republic |                         |                             |                                  |                                      |                                |                                    |                                         |                                             | 29 (14-34)               | 49 (27-72)                   |                                   |                                       |                    |                        |                             |                                 |
| 2015 | Central African Republic |                         |                             |                                  |                                      |                                |                                    |                                         |                                             | 29 (14-34)               | 49 (27-72)                   |                                   |                                       |                    |                        |                             |                                 |
| 2000 | Chad                     | 435 (11400-1899)        | 92 (47-65)                  | 187 (152-273)                    | 7 (7-1)                              | 118 (131-440)                  | 10 (0-20)                          | 31 (10-63)                              | 1 (0-1)                                     | 64 (10-106)              | 9 (10-16)                    | 0 (0-0)                           | 0 (0-0)                               | 11 (1-18)          | 0 (0-0)                | 0 (0-0)                     | 0 (0-0)                         |
| 2001 | Chad                     |                         |                             |                                  |                                      |                                |                                    |                                         |                                             | 64 (10-106)              | 9 (10-16)                    |                                   |                                       |                    |                        |                             |                                 |
| 2002 | Chad                     |                         |                             |                                  |                                      |                                |                                    |                                         |                                             | 64 (10-106)              | 9 (10-16)                    |                                   |                                       |                    |                        |                             |                                 |
| 2003 | Chad                     |                         |                             |                                  |                                      |                                |                                    |                                         |                                             | 64 (10-106)              | 9 (10-16)                    |                                   |                                       |                    |                        |                             |                                 |
| 2004 | Chad                     |                         |                             |                                  |                                      |                                |                                    |                                         |                                             | 64 (10-106)              | 9 (10-16)                    |                                   |                                       |                    |                        |                             |                                 |
| 2005 | Chad                     |                         |                             |                                  |                                      |                                |                                    |                                         |                                             | 64 (10-106)              | 9 (10-16)                    |                                   |                                       |                    |                        |                             |                                 |
| 2006 | Chad                     |                         |                             |                                  |                                      |                                |                                    |                                         |                                             | 64 (10-106)              | 9 (10-16)                    |                                   |                                       |                    |                        |                             |                                 |
| 2007 | Chad                     |                         |                             |                                  |                                      |                                |                                    |                                         |                                             | 64 (10-106)              | 9 (10-16)                    |                                   |                                       |                    |                        |                             |                                 |
| 2008 | Chad                     |                         |                             |                                  |                                      |                                |                                    |                                         |                                             | 64 (10-106)              | 9 (10-16)                    |                                   |                                       |                    |                        |                             |                                 |
| 2009 | Chad                     |                         |                             |                                  |                                      |                                |                                    |                                         |                                             | 64 (10-106)              | 9 (10-16)                    |                                   |                                       |                    |                        |                             |                                 |
| 2010 | Chad                     |                         |                             |                                  |                                      |                                |                                    |                                         |                                             | 64 (10-106)              | 9 (10-16)                    |                                   |                                       |                    |                        |                             |                                 |
| 2011 | Chad                     |                         |                             |                                  |                                      |                                |                                    |                                         |                                             | 64 (10-106)              | 9 (10-16)                    |                                   |                                       |                    |                        |                             |                                 |
| 2012 | Chad                     |                         |                             |                                  |                                      |                                |                                    |                                         |                                             | 64 (10-106)              | 9 (10-16)                    |                                   |                                       |                    |                        |                             |                                 |
| 2013 | Chad                     |                         |                             |                                  |                                      |                                |                                    |                                         |                                             | 64 (10-106)              | 9 (10-16)                    |                                   |                                       |                    |                        |                             |                                 |
| 2014 | Chad                     |                         |                             |                                  |                                      |                                |                                    |                                         |                                             | 64 (10-106)              | 9 (10-16)                    |                                   |                                       |                    |                        |                             |                                 |
| 2015 | Chad                     |                         |                             |                                  |                                      |                                |                                    |                                         |                                             | 64 (10-106)              | 9 (10-16)                    |                                   |                                       |                    |                        |                             |                                 |
| 2000 | China                    | 984 (808-1607)          | 320 (110-798)               | 199 (168-262)                    | 3 (3-1)                              | 772 (685-1388)                 | 72 (10-26)                         | 70 (18-60)                              | 1 (1-0)                                     | 20 (10-26)               | 7 (8-11)                     | 0 (0-0)                           | 0 (0-0)                               | 11 (1-16)          | 0 (0-0)                | 0 (0-0)                     | 0 (0-0)                         |
| 2001 | China                    |                         |                             |                                  |                                      |                                |                                    |                                         |                                             | 20 (10-26)               | 7 (8-11)                     |                                   |                                       |                    |                        |                             |                                 |
| 2002 | China                    |                         |                             |                                  |                                      |                                |                                    |                                         |                                             | 20 (10-26)               | 7 (8-11)                     |                                   |                                       |                    |                        |                             |                                 |
| 2003 | China                    |                         |                             |                                  |                                      |                                |                                    |                                         |                                             | 20 (10-26)               | 7 (8-11)                     |                                   |                                       |                    |                        |                             |                                 |
| 2004 | China                    |                         |                             |                                  |                                      |                                |                                    |                                         |                                             | 20 (10-26)               | 7 (8-11)                     |                                   |                                       |                    |                        |                             |                                 |
| 2005 | China                    |                         |                             |                                  |                                      |                                |                                    |                                         |                                             | 20 (10-26)               | 7 (8-11)                     |                                   |                                       |                    |                        |                             |                                 |
| 2006 | China                    |                         |                             |                                  |                                      |                                |                                    |                                         |                                             | 20 (10-26)               | 7 (8-11)                     |                                   |                                       |                    |                        |                             |                                 |
| 2007 | China                    |                         |                             |                                  |                                      |                                |                                    |                                         |                                             | 20 (10-26)               | 7 (8-11)                     |                                   |                                       |                    |                        |                             |                                 |
| 2008 | China                    |                         |                             |                                  |                                      |                                |                                    |                                         |                                             | 20 (10-26)               | 7 (8-11)                     |                                   |                                       |                    |                        |                             |                                 |
| 2009 | China                    |                         |                             |                                  |                                      |                                |                                    |                                         |                                             | 20 (10-26)               | 7 (8-11)                     |                                   |                                       |                    |                        |                             |                                 |
| 2010 | China                    |                         |                             |                                  |                                      |                                |                                    |                                         |                                             | 20 (10-26)               | 7 (8-11)                     |                                   |                                       |                    |                        |                             |                                 |
| 2011 | China                    |                         |                             |                                  |                                      |                                |                                    |                                         |                                             | 20 (10-26)               | 7 (8-11)                     |                                   |                                       |                    |                        |                             |                                 |
| 2012 | China                    |                         |                             |                                  |                                      |                                |                                    |                                         |                                             | 20 (10-26)               | 7 (8-11)                     |                                   |                                       |                    |                        |                             |                                 |
| 2013 | China                    |                         |                             |                                  |                                      |                                |                                    |                                         |                                             | 20 (10-26)               | 7 (8-11)                     |                                   |                                       |                    |                        |                             |                                 |
| 2014 | China                    |                         |                             |                                  |                                      |                                |                                    |                                         |                                             | 20 (10-26)               | 7 (8-11)                     |                                   |                                       |                    |                        |                             |                                 |
| 2015 | China                    |                         |                             |                                  |                                      |                                |                                    |                                         |                                             | 20 (10-26)               | 7 (8-11)                     |                                   |                                       |                    |                        |                             |                                 |
| 2000 | China                    | 107539 (9201-717299)    | 0 (0-0)                     | 0 (0-0)                          | 0 (0-0)                              | 107591 (11022-39599)           | 0 (0-0)                            | 1 (0-2)                                 | 0 (0-0)                                     | 1075 (940-6046)          | 21 (12-30)                   | 0 (0-0)                           | 0 (0-0)                               | 6029 (1199-10671)  | 0 (0-0)                | 0 (0-0)                     | 0 (0-0)                         |
| 2001 | China                    |                         |                             |                                  |                                      |                                |                                    |                                         |                                             | 1075 (940-6046)          | 21 (12-30)                   |                                   |                                       |                    |                        |                             |                                 |
| 2002 | China                    |                         |                             |                                  |                                      |                                |                                    |                                         |                                             | 1075 (940-6046)          | 21 (12-30)                   |                                   |                                       |                    |                        |                             |                                 |
| 2003 | China                    |                         |                             |                                  |                                      |                                |                                    |                                         |                                             | 1075 (940-6046)          | 21 (12-30)                   |                                   |                                       |                    |                        |                             |                                 |
| 2004 | China                    |                         |                             |                                  |                                      |                                |                                    |                                         |                                             | 1075 (940-6046)          | 21 (12-30)                   |                                   |                                       |                    |                        |                             |                                 |
| 2005 | China                    |                         |                             |                                  |                                      |                                |                                    |                                         |                                             | 1075 (940-6046)          | 21 (12-30)                   |                                   |                                       |                    |                        |                             |                                 |
| 2006 | China                    |                         |                             |                                  |                                      |                                |                                    |                                         |                                             | 1075 (940-6046)          | 21 (12-30)                   |                                   |                                       |                    |                        |                             |                                 |
| 2007 | China                    |                         |                             |                                  |                                      |                                |                                    |                                         |                                             | 1075 (940-6046)          | 21 (12-30)                   |                                   |                                       |                    |                        |                             |                                 |
| 2008 | China                    |                         |                             |                                  |                                      |                                |                                    |                                         |                                             | 1075 (940-6046)          | 21 (12-30)                   |                                   |                                       |                    |                        |                             |                                 |
| 2009 | China                    |                         |                             |                                  |                                      |                                |                                    |                                         |                                             | 1075 (940-6046)          | 21 (12-30)                   |                                   |                                       |                    |                        |                             |                                 |
| 2010 | China                    |                         |                             |                                  |                                      |                                |                                    |                                         |                                             | 1075 (940-6046)          | 21 (12-30)                   |                                   |                                       |                    |                        |                             |                                 |
| 2011 | China                    |                         |                             |                                  |                                      |                                |                                    |                                         |                                             | 1075 (940-6046)          | 21 (12-30)                   |                                   |                                       |                    |                        |                             |                                 |
| 2012 | China                    |                         |                             |                                  |                                      |                                |                                    |                                         |                                             | 1075 (940-6046)          | 21 (12-30)                   |                                   |                                       |                    |                        |                             |                                 |
| 2013 | China                    |                         |                             |                                  |                                      |                                |                                    |                                         |                                             | 1075 (940-6046)          | 21 (12-30)                   |                                   |                                       |                    |                        |                             |                                 |
| 2014 | China                    |                         |                             |                                  |                                      |                                |                                    |                                         |                                             | 1075 (940-6046)          | 21 (12-30)                   |                                   |                                       |                    |                        |                             |                                 |
| 2015 | China                    |                         |                             |                                  |                                      |                                |                                    |                                         |                                             | 1075 (940-6046)          | 21 (12-30)                   |                                   |                                       |                    |                        |                             |                                 |
| 2000 | Colombia                 | 3777 (1099-6133)        | 69 (83-110)                 | 61 (106-491)                     | 0 (0-0)                              | 6667 (10431-12213)             | 13 (0-24)                          | 74 (85-100)                             | 0 (0-0)                                     | 1762 (801-3962)          | 23 (11-36)                   | 0 (0-0)                           | 0 (0-0)                               | 6309 (1197-10303)  | 0 (0-0)                | 0 (0-0)                     | 0 (0-0)                         |
| 2001 | Colombia                 |                         |                             |                                  |                                      |                                |                                    |                                         |                                             | 1762 (801-3962)          | 23 (11-36)                   |                                   |                                       |                    |                        |                             |                                 |
| 2002 | Colombia                 |                         |                             |                                  |                                      |                                |                                    |                                         |                                             | 1762 (801-3962)          | 23 (11-36)                   |                                   |                                       |                    |                        |                             |                                 |
| 2003 | Colombia                 |                         |                             |                                  |                                      |                                |                                    |                                         |                                             | 1762 (801-3962)          | 23 (11-36)                   |                                   |                                       |                    |                        |                             |                                 |
| 2004 | Colombia                 |                         |                             |                                  |                                      |                                |                                    |                                         |                                             | 1762 (801-3962)          | 23 (11-36)                   |                                   |                                       |                    |                        |                             |                                 |
| 2005 | Colombia                 |                         |                             |                                  |                                      |                                |                                    |                                         |                                             | 1762 (801-3962)          | 23 (11-36)                   |                                   |                                       |                    |                        |                             |                                 |
| 2006 | Colombia                 |                         |                             |                                  |                                      |                                |                                    |                                         |                                             | 1762 (801-3962)          | 23 (11-36)                   |                                   |                                       |                    |                        |                             |                                 |
| 2007 | Colombia                 |                         |                             |                                  |                                      |                                |                                    |                                         |                                             | 1762 (801-3962)          | 23 (11-36)                   |                                   |                                       |                    |                        |                             |                                 |
| 2008 | Colombia                 |                         |                             |                                  |                                      |                                |                                    |                                         |                                             | 1762 (801-3962)          | 23 (11-36)                   |                                   |                                       |                    |                        |                             |                                 |
| 2009 | Colombia                 |                         |                             |                                  |                                      |                                |                                    |                                         |                                             | 1762 (801-3962)          | 23 (11-36)                   |                                   |                                       |                    |                        |                             |                                 |
| 2010 | Colombia                 |                         |                             |                                  |                                      |                                |                                    |                                         |                                             | 1762 (801-3962)          | 23 (11-36)                   |                                   |                                       |                    |                        |                             |                                 |
| 2011 | Colombia                 |                         |                             |                                  |                                      |                                |                                    |                                         |                                             | 1762 (801-3962)          | 23 (11-36)                   |                                   |                                       |                    |                        |                             |                                 |
| 2012 | Colombia                 |                         |                             |                                  |                                      |                                |                                    |                                         |                                             | 1762 (801-3962)          | 23 (11-36)                   |                                   |                                       |                    |                        |                             |                                 |
| 2013 | Colombia                 |                         |                             |                                  |                                      |                                |                                    |                                         |                                             | 1762 (801-3962)          | 23 (11-36)                   |                                   |                                       |                    |                        |                             |                                 |
| 2014 | Colombia                 |                         |                             |                                  |                                      |                                |                                    |                                         |                                             | 1762 (801-3962)          | 23 (11-36)                   |                                   |                                       |                    |                        |                             |                                 |
| 2015 | Colombia                 |                         |                             |                                  |                                      |                                |                                    |                                         |                                             | 1762 (801-3962)          | 23 (11-36)                   |                                   |                                       |                    |                        |                             |                                 |
| 2000 | Colombia                 | 1534 (981-4731)         | 0 (0-0)                     | 131 (100-14)                     | 0 (0-0)                              | 1678 (1043-2017)               | 0 (0-0)                            | 0 (0-0)                                 | 0 (0-0)                                     | 99 (28-101)              | 6 (0-10)                     | 0 (0-0)                           | 0 (0-0)                               | 23 (41-21)         | 0 (0-0)                | 0 (0-0)                     | 0 (0-0)                         |
| 2001 | Colombia                 |                         |                             |                                  |                                      |                                |                                    |                                         |                                             | 99 (28-101)              | 6 (0-10)                     |                                   |                                       |                    |                        |                             |                                 |
| 2002 | Colombia                 |                         |                             |                                  |                                      |                                |                                    |                                         |                                             | 99 (28-101)              | 6 (0-10)                     |                                   |                                       |                    |                        |                             |                                 |
| 2003 | Colombia                 |                         |                             |                                  |                                      |                                |                                    |                                         |                                             | 99 (28-101)              | 6 (0-10)                     |                                   |                                       |                    |                        |                             |                                 |
| 2004 |                          |                         |                             |                                  |                                      |                                |                                    |                                         |                                             |                          |                              |                                   |                                       |                    |                        |                             |                                 |

| Year | Country                               | HB pneumonia cases (CI) | HB pneumonia cases, MV (CI) | HB pneumonia incidence rate (CI) | HB pneumonia incidence rate, MV (CI) | HB severe pneumonia cases (CI) | HB severe pneumonia cases, MV (CI) | HB severe pneumonia incidence rate (CI) | HB severe pneumonia incidence rate, MV (CI) | HB meningitis cases (CI) | HB meningitis cases, MV (CI) | HB meningitis incidence rate (CI) | HB meningitis incidence rate, MV (CI) | HB NPMW cases (CI) | HB NPMW cases, MV (CI) | HB NPMW incidence rate (CI) | HB NPMW incidence rate, MV (CI) |
|------|---------------------------------------|-------------------------|-----------------------------|----------------------------------|--------------------------------------|--------------------------------|------------------------------------|-----------------------------------------|---------------------------------------------|--------------------------|------------------------------|-----------------------------------|---------------------------------------|--------------------|------------------------|-----------------------------|---------------------------------|
| 2000 | Croatia                               | 0                       | 0                           | 0                                | 0                                    | 0                              | 0                                  | 0                                       | 0                                           | 0                        | 0                            | 0                                 | 0                                     | 0                  | 0                      | 0                           | 0                               |
| 2001 | Croatia                               | 0                       | 0                           | 0                                | 0                                    | 0                              | 0                                  | 0                                       | 0                                           | 0                        | 0                            | 0                                 | 0                                     | 0                  | 0                      | 0                           | 0                               |
| 2002 | Croatia                               | 0                       | 0                           | 0                                | 0                                    | 0                              | 0                                  | 0                                       | 0                                           | 0                        | 0                            | 0                                 | 0                                     | 0                  | 0                      | 0                           | 0                               |
| 2003 | Croatia                               | 0                       | 0                           | 0                                | 0                                    | 0                              | 0                                  | 0                                       | 0                                           | 0                        | 0                            | 0                                 | 0                                     | 0                  | 0                      | 0                           | 0                               |
| 2004 | Croatia                               | 0                       | 0                           | 0                                | 0                                    | 0                              | 0                                  | 0                                       | 0                                           | 0                        | 0                            | 0                                 | 0                                     | 0                  | 0                      | 0                           | 0                               |
| 2005 | Croatia                               | 0                       | 0                           | 0                                | 0                                    | 0                              | 0                                  | 0                                       | 0                                           | 0                        | 0                            | 0                                 | 0                                     | 0                  | 0                      | 0                           | 0                               |
| 2006 | Croatia                               | 0                       | 0                           | 0                                | 0                                    | 0                              | 0                                  | 0                                       | 0                                           | 0                        | 0                            | 0                                 | 0                                     | 0                  | 0                      | 0                           | 0                               |
| 2007 | Croatia                               | 0                       | 0                           | 0                                | 0                                    | 0                              | 0                                  | 0                                       | 0                                           | 0                        | 0                            | 0                                 | 0                                     | 0                  | 0                      | 0                           | 0                               |
| 2008 | Croatia                               | 0                       | 0                           | 0                                | 0                                    | 0                              | 0                                  | 0                                       | 0                                           | 0                        | 0                            | 0                                 | 0                                     | 0                  | 0                      | 0                           | 0                               |
| 2009 | Croatia                               | 0                       | 0                           | 0                                | 0                                    | 0                              | 0                                  | 0                                       | 0                                           | 0                        | 0                            | 0                                 | 0                                     | 0                  | 0                      | 0                           | 0                               |
| 2010 | Croatia                               | 0                       | 0                           | 0                                | 0                                    | 0                              | 0                                  | 0                                       | 0                                           | 0                        | 0                            | 0                                 | 0                                     | 0                  | 0                      | 0                           | 0                               |
| 2011 | Croatia                               | 0                       | 0                           | 0                                | 0                                    | 0                              | 0                                  | 0                                       | 0                                           | 0                        | 0                            | 0                                 | 0                                     | 0                  | 0                      | 0                           | 0                               |
| 2012 | Croatia                               | 0                       | 0                           | 0                                | 0                                    | 0                              | 0                                  | 0                                       | 0                                           | 0                        | 0                            | 0                                 | 0                                     | 0                  | 0                      | 0                           | 0                               |
| 2013 | Croatia                               | 0                       | 0                           | 0                                | 0                                    | 0                              | 0                                  | 0                                       | 0                                           | 0                        | 0                            | 0                                 | 0                                     | 0                  | 0                      | 0                           | 0                               |
| 2014 | Croatia                               | 0                       | 0                           | 0                                | 0                                    | 0                              | 0                                  | 0                                       | 0                                           | 0                        | 0                            | 0                                 | 0                                     | 0                  | 0                      | 0                           | 0                               |
| 2015 | Croatia                               | 0                       | 0                           | 0                                | 0                                    | 0                              | 0                                  | 0                                       | 0                                           | 0                        | 0                            | 0                                 | 0                                     | 0                  | 0                      | 0                           | 0                               |
| 2000 | Cuba                                  | 65 (60-107)             | 0                           | 0                                | 0                                    | 20 (24-31)                     | 0                                  | 0                                       | 0                                           | 11 (4-18)                | 0                            | 0                                 | 0                                     | 4 (0-4)            | 0                      | 0                           | 0                               |
| 2001 | Cuba                                  |                         |                             |                                  |                                      |                                |                                    |                                         |                                             | 9 (0-9)                  |                              |                                   |                                       |                    |                        |                             |                                 |
| 2002 | Cuba                                  |                         |                             |                                  |                                      |                                |                                    |                                         |                                             | 11 (4-18)                |                              |                                   |                                       |                    |                        |                             |                                 |
| 2003 | Cuba                                  |                         |                             |                                  |                                      |                                |                                    |                                         |                                             | 8 (3-13)                 |                              |                                   |                                       |                    |                        |                             |                                 |
| 2004 | Cuba                                  |                         |                             |                                  |                                      |                                |                                    |                                         |                                             | 1 (0-2)                  |                              |                                   |                                       |                    |                        |                             |                                 |
| 2005 | Cuba                                  |                         |                             |                                  |                                      |                                |                                    |                                         |                                             | 1 (0-2)                  |                              |                                   |                                       |                    |                        |                             |                                 |
| 2006 | Cuba                                  |                         |                             |                                  |                                      |                                |                                    |                                         |                                             | 1 (0-2)                  |                              |                                   |                                       |                    |                        |                             |                                 |
| 2007 | Cuba                                  |                         |                             |                                  |                                      |                                |                                    |                                         |                                             | 1 (0-1)                  |                              |                                   |                                       |                    |                        |                             |                                 |
| 2008 | Cuba                                  |                         |                             |                                  |                                      |                                |                                    |                                         |                                             | 1 (0-2)                  |                              |                                   |                                       |                    |                        |                             |                                 |
| 2009 | Cuba                                  |                         |                             |                                  |                                      |                                |                                    |                                         |                                             | 1 (0-2)                  |                              |                                   |                                       |                    |                        |                             |                                 |
| 2010 | Cuba                                  |                         |                             |                                  |                                      |                                |                                    |                                         |                                             | 1 (0-2)                  |                              |                                   |                                       |                    |                        |                             |                                 |
| 2011 | Cuba                                  |                         |                             |                                  |                                      |                                |                                    |                                         |                                             | 1 (0-2)                  |                              |                                   |                                       |                    |                        |                             |                                 |
| 2012 | Cuba                                  |                         |                             |                                  |                                      |                                |                                    |                                         |                                             | 1 (0-2)                  |                              |                                   |                                       |                    |                        |                             |                                 |
| 2013 | Cuba                                  |                         |                             |                                  |                                      |                                |                                    |                                         |                                             | 1 (0-2)                  |                              |                                   |                                       |                    |                        |                             |                                 |
| 2014 | Cuba                                  |                         |                             |                                  |                                      |                                |                                    |                                         |                                             | 1 (0-2)                  |                              |                                   |                                       |                    |                        |                             |                                 |
| 2015 | Cuba                                  |                         |                             |                                  |                                      |                                |                                    |                                         |                                             | 1 (0-2)                  |                              |                                   |                                       |                    |                        |                             |                                 |
| 2000 | Cyprus                                | 9 (0-14)                | 0                           | 0                                | 0                                    | 3 (0-5)                        | 0                                  | 0                                       | 0                                           | 1 (0-1)                  | 0                            | 0                                 | 0                                     | 0                  | 0                      | 0                           | 0                               |
| 2001 | Cyprus                                | 15 (6-122)              |                             |                                  |                                      | 23 (4-47)                      |                                    |                                         |                                             | 3 (1-5)                  |                              |                                   |                                       | 2 (1-5)            |                        |                             |                                 |
| 2002 | Cyprus                                |                         |                             |                                  |                                      |                                |                                    |                                         |                                             | 2 (1-2)                  |                              |                                   |                                       | 1 (0-1)            |                        |                             |                                 |
| 2003 | Cyprus                                |                         |                             |                                  |                                      |                                |                                    |                                         |                                             | 1 (0-1)                  |                              |                                   |                                       | 1 (1-2)            |                        |                             |                                 |
| 2004 | Cyprus                                |                         |                             |                                  |                                      |                                |                                    |                                         |                                             | 1 (0-1)                  |                              |                                   |                                       | 0                  |                        |                             |                                 |
| 2005 | Cyprus                                |                         |                             |                                  |                                      |                                |                                    |                                         |                                             | 1 (1-2)                  |                              |                                   |                                       | 0                  |                        |                             |                                 |
| 2006 | Cyprus                                |                         |                             |                                  |                                      |                                |                                    |                                         |                                             | 0                        |                              |                                   |                                       | 0                  |                        |                             |                                 |
| 2007 | Cyprus                                |                         |                             |                                  |                                      |                                |                                    |                                         |                                             | 0                        |                              |                                   |                                       | 0                  |                        |                             |                                 |
| 2008 | Cyprus                                |                         |                             |                                  |                                      |                                |                                    |                                         |                                             | 0                        |                              |                                   |                                       | 0                  |                        |                             |                                 |
| 2009 | Cyprus                                |                         |                             |                                  |                                      |                                |                                    |                                         |                                             | 0                        |                              |                                   |                                       | 0                  |                        |                             |                                 |
| 2010 | Cyprus                                |                         |                             |                                  |                                      |                                |                                    |                                         |                                             | 0                        |                              |                                   |                                       | 0                  |                        |                             |                                 |
| 2011 | Cyprus                                |                         |                             |                                  |                                      |                                |                                    |                                         |                                             | 0                        |                              |                                   |                                       | 0                  |                        |                             |                                 |
| 2012 | Cyprus                                |                         |                             |                                  |                                      |                                |                                    |                                         |                                             | 0                        |                              |                                   |                                       | 0                  |                        |                             |                                 |
| 2013 | Cyprus                                |                         |                             |                                  |                                      |                                |                                    |                                         |                                             | 0                        |                              |                                   |                                       | 0                  |                        |                             |                                 |
| 2014 | Cyprus                                |                         |                             |                                  |                                      |                                |                                    |                                         |                                             | 0                        |                              |                                   |                                       | 0                  |                        |                             |                                 |
| 2015 | Cyprus                                |                         |                             |                                  |                                      |                                |                                    |                                         |                                             | 0                        |                              |                                   |                                       | 0                  |                        |                             |                                 |
| 2000 | Czech Republic                        | 327 (98-534)            | 0                           | 0                                | 0                                    | 101 (61-206)                   | 0                                  | 0                                       | 0                                           | 37 (16-58)               | 0                            | 0                                 | 0                                     | 12 (7-19)          | 0                      | 0                           | 0                               |
| 2001 | Czech Republic                        |                         |                             |                                  |                                      |                                |                                    |                                         |                                             | 41 (28-54)               |                              |                                   |                                       | 14 (10-19)         |                        |                             |                                 |
| 2002 | Czech Republic                        |                         |                             |                                  |                                      |                                |                                    |                                         |                                             | 4 (0-8)                  |                              |                                   |                                       | 1 (1-3)            |                        |                             |                                 |
| 2003 | Czech Republic                        |                         |                             |                                  |                                      |                                |                                    |                                         |                                             | 2 (1-4)                  |                              |                                   |                                       | 0                  |                        |                             |                                 |
| 2004 | Czech Republic                        |                         |                             |                                  |                                      |                                |                                    |                                         |                                             | 5 (3-10)                 |                              |                                   |                                       | 1 (1-2)            |                        |                             |                                 |
| 2005 | Czech Republic                        |                         |                             |                                  |                                      |                                |                                    |                                         |                                             | 3 (1-6)                  |                              |                                   |                                       | 1 (0-2)            |                        |                             |                                 |
| 2006 | Czech Republic                        |                         |                             |                                  |                                      |                                |                                    |                                         |                                             | 1 (1-2)                  |                              |                                   |                                       | 0                  |                        |                             |                                 |
| 2007 | Czech Republic                        |                         |                             |                                  |                                      |                                |                                    |                                         |                                             | 1 (0-2)                  |                              |                                   |                                       | 0                  |                        |                             |                                 |
| 2008 | Czech Republic                        |                         |                             |                                  |                                      |                                |                                    |                                         |                                             | 0                        |                              |                                   |                                       | 0                  |                        |                             |                                 |
| 2009 | Czech Republic                        |                         |                             |                                  |                                      |                                |                                    |                                         |                                             | 0                        |                              |                                   |                                       | 0                  |                        |                             |                                 |
| 2010 | Czech Republic                        |                         |                             |                                  |                                      |                                |                                    |                                         |                                             | 0                        |                              |                                   |                                       | 0                  |                        |                             |                                 |
| 2011 | Czech Republic                        |                         |                             |                                  |                                      |                                |                                    |                                         |                                             | 0                        |                              |                                   |                                       | 0                  |                        |                             |                                 |
| 2012 | Czech Republic                        |                         |                             |                                  |                                      |                                |                                    |                                         |                                             | 0                        |                              |                                   |                                       | 0                  |                        |                             |                                 |
| 2013 | Czech Republic                        |                         |                             |                                  |                                      |                                |                                    |                                         |                                             | 0                        |                              |                                   |                                       | 0                  |                        |                             |                                 |
| 2014 | Czech Republic                        |                         |                             |                                  |                                      |                                |                                    |                                         |                                             | 0                        |                              |                                   |                                       | 0                  |                        |                             |                                 |
| 2015 | Czech Republic                        |                         |                             |                                  |                                      |                                |                                    |                                         |                                             | 0                        |                              |                                   |                                       | 0                  |                        |                             |                                 |
| 2000 | Democratic People's Republic of Korea | 32918 (20110-53683)     | 0                           | 0                                | 0                                    | 1681 (1044-2612)               | 0                                  | 0                                       | 0                                           | 1681 (902-3114)          | 0                            | 0                                 | 0                                     | 549 (202-1414)     | 0                      | 0                           | 0                               |
| 2001 | Democratic People's Republic of Korea |                         |                             |                                  |                                      |                                |                                    |                                         |                                             | 130 (71-197)             |                              |                                   |                                       | 48 (24-75)         |                        |                             |                                 |
| 2002 | Democratic People's Republic of Korea |                         |                             |                                  |                                      |                                |                                    |                                         |                                             | 1019 (594-1544)          |                              |                                   |                                       | 34 (21-53)         |                        |                             |                                 |
| 2003 | Democratic People's Republic of Korea |                         |                             |                                  |                                      |                                |                                    |                                         |                                             | 820 (447-1180)           |                              |                                   |                                       | 270 (151-400)      |                        |                             |                                 |
| 2004 | Democratic People's Republic of Korea |                         |                             |                                  |                                      |                                |                                    |                                         |                                             | 645 (344-945)            |                              |                                   |                                       | 34 (21-53)         |                        |                             |                                 |
| 2005 | Democratic People's Republic of Korea |                         |                             |                                  |                                      |                                |                                    |                                         |                                             | 560 (264-911)            |                              |                                   |                                       | 189 (90-272)       |                        |                             |                                 |
| 2006 | Democratic People's Republic of Korea |                         |                             |                                  |                                      |                                |                                    |                                         |                                             | 645 (344-945)            |                              |                                   |                                       | 119 (63-200)       |                        |                             |                                 |
| 2007 | Democratic People's Republic of Korea |                         |                             |                                  |                                      |                                |                                    |                                         |                                             | 645 (344-945)            |                              |                                   |                                       | 101 (51-158)       |                        |                             |                                 |
| 2008 | Democratic People's Republic of Korea |                         |                             |                                  |                                      |                                |                                    |                                         |                                             | 418 (184-627)            |                              |                                   |                                       | 141 (83-211)       |                        |                             |                                 |
| 2009 | Democratic People's Republic of Korea |                         |                             |                                  |                                      |                                |                                    |                                         |                                             | 421 (201-641)            |                              |                                   |                                       | 21 (10-38)         |                        |                             |                                 |
| 2010 | Democratic People's Republic of Korea |                         |                             |                                  |                                      |                                |                                    |                                         |                                             | 357 (154-549)            |                              |                                   |                                       | 120 (57-185)       |                        |                             |                                 |
| 2011 | Democratic People's Republic of Korea |                         |                             |                                  |                                      |                                |                                    |                                         |                                             | 258 (124-428)            |                              |                                   |                                       | 71 (41-112)        |                        |                             |                                 |
| 2012 | Democratic People's Republic of Korea |                         |                             |                                  |                                      |                                |                                    |                                         |                                             | 243 (104-425)            |                              |                                   |                                       | 82 (41-136)        |                        |                             |                                 |
| 2013 | Democratic People's Republic of Korea |                         |                             |                                  |                                      |                                |                                    |                                         |                                             | 28 (4-42)                |                              |                                   |                                       | 0                  |                        |                             |                                 |
| 2014 | Democratic People's Republic of Korea |                         |                             |                                  |                                      |                                |                                    |                                         |                                             | 23 (1-36)                |                              |                                   |                                       | 8 (1-13)           |                        |                             |                                 |
| 2015 | Democratic People's Republic of Korea |                         |                             |                                  |                                      |                                |                                    |                                         |                                             | 0                        |                              |                                   |                                       | 0                  |                        |                             |                                 |
| 2000 | Democratic Republic of Congo          | 17855 (16220-19276)     | 0                           | 0                                | 0                                    | 3340 (2022-4749)               | 0                                  | 0                                       | 0                                           | 52 (24-77)               | 0                            | 0                                 | 0                                     | 730 (388-1177)     | 0                      | 0                           | 0                               |
| 2001 | Democratic Republic of Congo          |                         |                             |                                  |                                      |                                |                                    |                                         |                                             | 455 (214-696)            |                              |                                   |                                       | 792 (392-1192)     |                        |                             |                                 |
| 2002 | Democratic Republic of Congo          |                         |                             |                                  |                                      |                                |                                    |                                         |                                             | 470 (214-727)            |                              |                                   |                                       | 811 (352-1271)     |                        |                             |                                 |
| 2003 | Democratic Republic of Congo          |                         |                             |                                  |                                      |                                |                                    |                                         |                                             | 455 (214-696)            |                              |                                   |                                       | 834 (374-1294)     |                        |                             |                                 |
| 2004 | Democratic Republic of Congo          |                         |                             |                                  |                                      |                                |                                    |                                         |                                             | 470 (214-727)            |                              |                                   |                                       | 819 (351-1290)     |                        |                             |                                 |
| 2005 | Democratic Republic of Congo          |                         |                             |                                  |                                      |                                |                                    |                                         |                                             | 452 (208-700)            |                              |                                   |                                       | 847 (372-1322)     |                        |                             |                                 |
| 2006 | Democratic Republic of Congo          |                         |                             |                                  |                                      |                                |                                    |                                         |                                             | 452 (208-700)            |                              |                                   |                                       | 850 (377-1323)     |                        |                             |                                 |
| 2007 | Democratic Republic of Congo          |                         |                             |                                  |                                      |                                |                                    |                                         |                                             | 547 (252-842)            |                              |                                   |                                       | 46 (15-73)         |                        |                             |                                 |
| 2008 | Democratic Republic of Congo          |                         |                             |                                  |                                      |                                |                                    |                                         |                                             | 150 (60-240)             |                              |                                   |                                       | 264 (99-429)       |                        |                             |                                 |
| 2009 | Democratic Republic of Congo          |                         |                             |                                  |                                      |                                |                                    |                                         |                                             | 484 (212-757)            |                              |                                   |                                       | 145 (67-226)       |                        |                             |                                 |
| 2010 | Democratic Republic of Congo          |                         |                             |                                  |                                      |                                |                                    |                                         |                                             | 730 (241-1220)           |                              |                                   |                                       | 129 (40-209)       |                        |                             |                                 |
| 2011 | Democratic Republic of Congo          |                         |                             |                                  |                                      |                                |                                    |                                         |                                             | 730 (241-1220)           |                              |                                   |                                       | 135 (42-208)       |                        |                             |                                 |
| 2012 | Democratic Republic of Congo          |                         |                             |                                  |                                      |                                |                                    |                                         |                                             | 730 (241-1220)           |                              |                                   |                                       | 135 (42-208)       |                        |                             |                                 |
| 2013 | Democratic Republic of Congo          |                         |                             |                                  |                                      |                                |                                    |                                         |                                             | 811 (352-1271)           |                              |                                   |                                       | 141 (52-230)       |                        |                             |                                 |
| 2014 | Democratic Republic of Congo          |                         |                             |                                  |                                      |                                |                                    |                                         |                                             | 77 (25-124)              |                              |                                   |                                       | 13 (4-21)          |                        |                             |                                 |
| 2015 | Democratic Republic of Congo          |                         |                             |                                  |                                      |                                |                                    |                                         |                                             | 77 (25-124)              |                              |                                   |                                       | 13 (4-21)          |                        |                             |                                 |
| 2000 | Denmark                               | 100 (143-240)           | 21 (0-31)                   | 13 (1-23)                        | 0                                    | 339 (202-481)                  | 0                                  | 0                                       | 0                                           | 17 (10-24)               | 1 (0-1)                      | 0                                 | 0                                     | 19 (10-28)         | 0                      | 0                           | 0                               |
| 2001 | Denmark                               | 2 (2-4)                 |                             | 1 (1-1)                          |                                      | 1 (0-2)                        |                                    |                                         |                                             | 0                        | 0                            | 0                                 | 0                                     | 0                  | 0                      | 0                           | 0                               |
| 2002 | Denmark                               |                         |                             |                                  |                                      |                                |                                    |                                         |                                             | 0                        | 0                            | 0                                 | 0                                     | 0                  | 0                      | 0                           | 0                               |
| 2003 | Denmark                               |                         |                             |                                  |                                      |                                |                                    |                                         |                                             | 0                        | 0                            | 0                                 | 0                                     | 0                  | 0                      | 0                           | 0                               |
| 2004 | Denmark                               |                         |                             |                                  |                                      |                                |                                    |                                         |                                             | 0                        | 0                            | 0                                 | 0                                     | 0                  | 0                      | 0                           | 0                               |
| 2005 | Denmark                               |                         |                             |                                  |                                      |                                |                                    |                                         |                                             | 0                        | 0                            | 0                                 | 0                                     | 0                  | 0                      | 0                           | 0                               |
| 2006 | Denmark                               |                         |                             |                                  |                                      |                                |                                    |                                         |                                             | 0                        | 0                            | 0                                 | 0                                     | 0                  | 0                      | 0                           | 0                               |
| 2007 | Denmark                               |                         |                             |                                  |                                      |                                |                                    |                                         |                                             | 0                        | 0                            | 0                                 | 0                                     | 0                  | 0                      | 0                           | 0                               |
| 2008 | Denmark                               |                         |                             |                                  |                                      |                                |                                    |                                         |                                             | 0                        | 0                            | 0                                 | 0                                     | 0                  | 0                      | 0                           | 0                               |
| 2009 | Denmark                               |                         |                             |                                  |                                      |                                |                                    |                                         |                                             | 0                        | 0                            | 0                                 | 0                                     | 0                  | 0                      | 0                           | 0                               |
| 2010 | Denmark                               |                         |                             |                                  |                                      |                                |                                    |                                         |                                             | 0                        | 0                            | 0                                 | 0                                     | 0                  | 0                      | 0                           | 0                               |
| 2011 | Denmark                               |                         |                             |                                  |                                      |                                |                                    |                                         |                                             | 0                        | 0                            | 0                                 | 0                                     | 0                  | 0                      | 0                           | 0                               |
| 2012 | Denmark                               |                         |                             |                                  |                                      |                                |                                    |                                         |                                             | 0                        | 0                            | 0                                 | 0                                     | 0                  | 0                      | 0                           | 0                               |
| 2013 | Denmark                               |                         |                             |                                  |                                      |                                |                                    |                                         |                                             | 0                        | 0                            | 0                                 | 0                                     | 0                  | 0                      | 0                           | 0                               |
| 2014 | Denmark                               |                         |                             |                                  |                                      |                                |                                    |                                         |                                             | 0                        | 0                            | 0                                 | 0                                     | 0                  | 0                      | 0                           | 0                               |
| 2015 | Denmark                               |                         |                             |                                  |                                      |                                |                                    |                                         |                                             | 0                        | 0                            | 0                                 | 0                                     | 0                  | 0                      | 0                           | 0                               |
| 2000 | Egypt                                 | 929 (646-1317)          | 0                           | 0                                | 0                                    | 173 (103-248)                  | 0                                  | 0                                       | 0                                           | 39 (14-61)               | 0                            | 0                                 | 0                                     | 7 (1-10)           | 0                      | 0                           | 0                               |
| 2001 | Egypt                                 |                         |                             |                                  |                                      |                                |                                    |                                         |                                             | 39 (15-60)               |                              |                                   |                                       | 7 (1-10)           |                        |                             |                                 |
| 2002 | Egypt                                 |                         |                             |                                  |                                      |                                |                                    |                                         |                                             | 37 (14-59)               |                              |                                   |                                       | 6 (1-10)           |                        |                             |                                 |
| 2003 | E                                     |                         |                             |                                  |                                      |                                |                                    |                                         |                                             |                          |                              |                                   |                                       |                    |                        |                             |                                 |







| Year | Country    | HB prevalence cases (CI) | HB prevalence cases, HIV (CI) | HB prevalence incidence rate (CI) | HB prevalence incidence rate, HIV (CI) | HB severe prevalence cases (CI) | HB severe prevalence cases, HIV (CI) | HB severe prevalence incidence rate (CI) | HB severe prevalence incidence rate, HIV (CI) | HB meningitis cases (CI) | HB meningitis cases, HIV (CI) | HB meningitis incidence rate (CI) | HB meningitis incidence rate, HIV (CI) | HB NPMR cases (CI) | HB NPMR cases, HIV (CI) | HB NPMR incidence rate (CI) | HB NPMR incidence rate, HIV (CI) |
|------|------------|--------------------------|-------------------------------|-----------------------------------|----------------------------------------|---------------------------------|--------------------------------------|------------------------------------------|-----------------------------------------------|--------------------------|-------------------------------|-----------------------------------|----------------------------------------|--------------------|-------------------------|-----------------------------|----------------------------------|
| 2007 | Japan      |                          |                               |                                   |                                        |                                 |                                      |                                          |                                               |                          |                               |                                   |                                        |                    |                         |                             |                                  |
| 2008 | Japan      |                          |                               |                                   |                                        |                                 |                                      |                                          |                                               |                          |                               |                                   |                                        |                    |                         |                             |                                  |
| 2009 | Japan      |                          |                               |                                   |                                        |                                 |                                      |                                          |                                               |                          |                               |                                   |                                        |                    |                         |                             |                                  |
| 2010 | Japan      |                          |                               |                                   |                                        |                                 |                                      |                                          |                                               |                          |                               |                                   |                                        |                    |                         |                             |                                  |
| 2011 | Japan      |                          |                               |                                   |                                        |                                 |                                      |                                          |                                               |                          |                               |                                   |                                        |                    |                         |                             |                                  |
| 2012 | Japan      |                          |                               |                                   |                                        |                                 |                                      |                                          |                                               |                          |                               |                                   |                                        |                    |                         |                             |                                  |
| 2013 | Japan      |                          |                               |                                   |                                        |                                 |                                      |                                          |                                               |                          |                               |                                   |                                        |                    |                         |                             |                                  |
| 2014 | Japan      |                          |                               |                                   |                                        |                                 |                                      |                                          |                                               |                          |                               |                                   |                                        |                    |                         |                             |                                  |
| 2015 | Japan      |                          |                               |                                   |                                        |                                 |                                      |                                          |                                               |                          |                               |                                   |                                        |                    |                         |                             |                                  |
| 2000 | Japan      | 7144 (6523-1072)         | 0 (0-0)                       | 6 (0-10)                          | 0 (0-0)                                | 2219 (1329-4479)                | 38 (23-76)                           | 0 (0-0)                                  | 0 (0-0)                                       | 289 (147-450)            | 0 (0-0)                       | 0 (0-0)                           | 0 (0-0)                                | 87 (60-123)        | 0 (0-0)                 | 2 (0-3)                     | 0 (0-0)                          |
| 2001 | Japan      |                          |                               |                                   |                                        |                                 |                                      |                                          |                                               | 207 (104-350)            | 0 (0-0)                       | 0 (0-0)                           | 0 (0-0)                                | 87 (60-123)        | 0 (0-0)                 | 2 (0-3)                     | 0 (0-0)                          |
| 2002 | Japan      |                          |                               |                                   |                                        |                                 |                                      |                                          |                                               | 186 (88-271)             | 0 (0-0)                       | 0 (0-0)                           | 0 (0-0)                                | 79 (60-123)        | 0 (0-0)                 | 1 (0-2)                     | 0 (0-0)                          |
| 2003 | Japan      |                          |                               |                                   |                                        |                                 |                                      |                                          |                                               | 234 (119-391)            | 0 (0-0)                       | 0 (0-0)                           | 0 (0-0)                                | 79 (60-123)        | 0 (0-0)                 | 1 (0-2)                     | 0 (0-0)                          |
| 2004 | Japan      |                          |                               |                                   |                                        |                                 |                                      |                                          |                                               | 187 (93-297)             | 0 (0-0)                       | 0 (0-0)                           | 0 (0-0)                                | 87 (60-123)        | 0 (0-0)                 | 1 (0-2)                     | 0 (0-0)                          |
| 2005 | Japan      |                          |                               |                                   |                                        |                                 |                                      |                                          |                                               | 199 (103-332)            | 0 (0-0)                       | 0 (0-0)                           | 0 (0-0)                                | 87 (60-123)        | 0 (0-0)                 | 1 (0-2)                     | 0 (0-0)                          |
| 2006 | Japan      |                          |                               |                                   |                                        |                                 |                                      |                                          |                                               | 194 (100-327)            | 0 (0-0)                       | 0 (0-0)                           | 0 (0-0)                                | 70 (58-87)         | 0 (0-0)                 | 1 (0-2)                     | 0 (0-0)                          |
| 2007 | Japan      |                          |                               |                                   |                                        |                                 |                                      |                                          |                                               | 189 (103-322)            | 0 (0-0)                       | 0 (0-0)                           | 0 (0-0)                                | 67 (64-12)         | 0 (0-0)                 | 1 (0-2)                     | 0 (0-0)                          |
| 2008 | Japan      |                          |                               |                                   |                                        |                                 |                                      |                                          |                                               | 174 (98-251)             | 0 (0-0)                       | 0 (0-0)                           | 0 (0-0)                                | 39 (30-49)         | 0 (0-0)                 | 1 (0-2)                     | 0 (0-0)                          |
| 2009 | Japan      |                          |                               |                                   |                                        |                                 |                                      |                                          |                                               | 183 (107-295)            | 0 (0-0)                       | 0 (0-0)                           | 0 (0-0)                                | 51 (28-86)         | 0 (0-0)                 | 1 (0-2)                     | 0 (0-0)                          |
| 2010 | Japan      |                          |                               |                                   |                                        |                                 |                                      |                                          |                                               | 202 (108-351)            | 0 (0-0)                       | 0 (0-0)                           | 0 (0-0)                                | 71 (66-106)        | 0 (0-0)                 | 1 (0-2)                     | 0 (0-0)                          |
| 2011 | Japan      |                          |                               |                                   |                                        |                                 |                                      |                                          |                                               | 89 (45-149)              | 0 (0-0)                       | 0 (0-0)                           | 0 (0-0)                                | 30 (15-50)         | 0 (0-0)                 | 1 (0-1)                     | 0 (0-0)                          |
| 2012 | Japan      |                          |                               |                                   |                                        |                                 |                                      |                                          |                                               | 79 (51-118)              | 0 (0-0)                       | 0 (0-0)                           | 0 (0-0)                                | 11 (0-2)           | 0 (0-0)                 | 0 (0-0)                     | 0 (0-0)                          |
| 2013 | Japan      |                          |                               |                                   |                                        |                                 |                                      |                                          |                                               | 77 (50-110)              | 0 (0-0)                       | 0 (0-0)                           | 0 (0-0)                                | 26 (14-41)         | 0 (0-0)                 | 0 (0-0)                     | 0 (0-0)                          |
| 2014 | Japan      |                          |                               |                                   |                                        |                                 |                                      |                                          |                                               | 72 (46-119)              | 0 (0-0)                       | 0 (0-0)                           | 0 (0-0)                                | 24 (12-40)         | 0 (0-0)                 | 0 (0-0)                     | 0 (0-0)                          |
| 2015 | Japan      |                          |                               |                                   |                                        |                                 |                                      |                                          |                                               | 73 (52)                  | 0 (0-0)                       | 0 (0-0)                           | 0 (0-0)                                | 23 (12)            | 0 (0-0)                 | 0 (0-0)                     | 0 (0-0)                          |
| 2000 | Jordan     | 5646 (5115-10597)        | 0 (0-0)                       | 19 (10-31)                        | 0 (0-0)                                | 199 (100-359)                   | 0 (0-0)                              | 0 (0-0)                                  | 0 (0-0)                                       | 42 (24-69)               | 0 (0-0)                       | 0 (0-0)                           | 0 (0-0)                                | 14 (7-23)          | 0 (0-0)                 | 0 (0-0)                     | 0 (0-0)                          |
| 2001 | Jordan     |                          |                               |                                   |                                        |                                 |                                      |                                          |                                               | 21 (9-49)                | 0 (0-0)                       | 0 (0-0)                           | 0 (0-0)                                | 7 (0-1)            | 0 (0-0)                 | 0 (0-0)                     | 0 (0-0)                          |
| 2002 | Jordan     |                          |                               |                                   |                                        |                                 |                                      |                                          |                                               | 2 (1-9)                  | 0 (0-0)                       | 0 (0-0)                           | 0 (0-0)                                | 2 (0-1)            | 0 (0-0)                 | 0 (0-0)                     | 0 (0-0)                          |
| 2003 | Jordan     |                          |                               |                                   |                                        |                                 |                                      |                                          |                                               | 1 (0-8)                  | 0 (0-0)                       | 0 (0-0)                           | 0 (0-0)                                | 0 (0-0)            | 0 (0-0)                 | 0 (0-0)                     | 0 (0-0)                          |
| 2004 | Jordan     |                          |                               |                                   |                                        |                                 |                                      |                                          |                                               | 0 (0-1)                  | 0 (0-0)                       | 0 (0-0)                           | 0 (0-0)                                | 0 (0-0)            | 0 (0-0)                 | 0 (0-0)                     | 0 (0-0)                          |
| 2005 | Jordan     |                          |                               |                                   |                                        |                                 |                                      |                                          |                                               | 0 (0-1)                  | 0 (0-0)                       | 0 (0-0)                           | 0 (0-0)                                | 0 (0-0)            | 0 (0-0)                 | 0 (0-0)                     | 0 (0-0)                          |
| 2006 | Jordan     |                          |                               |                                   |                                        |                                 |                                      |                                          |                                               | 0 (0-1)                  | 0 (0-0)                       | 0 (0-0)                           | 0 (0-0)                                | 0 (0-0)            | 0 (0-0)                 | 0 (0-0)                     | 0 (0-0)                          |
| 2007 | Jordan     |                          |                               |                                   |                                        |                                 |                                      |                                          |                                               | 0 (0-1)                  | 0 (0-0)                       | 0 (0-0)                           | 0 (0-0)                                | 0 (0-0)            | 0 (0-0)                 | 0 (0-0)                     | 0 (0-0)                          |
| 2008 | Jordan     |                          |                               |                                   |                                        |                                 |                                      |                                          |                                               | 0 (0-1)                  | 0 (0-0)                       | 0 (0-0)                           | 0 (0-0)                                | 0 (0-0)            | 0 (0-0)                 | 0 (0-0)                     | 0 (0-0)                          |
| 2009 | Jordan     |                          |                               |                                   |                                        |                                 |                                      |                                          |                                               | 0 (0-1)                  | 0 (0-0)                       | 0 (0-0)                           | 0 (0-0)                                | 0 (0-0)            | 0 (0-0)                 | 0 (0-0)                     | 0 (0-0)                          |
| 2010 | Jordan     |                          |                               |                                   |                                        |                                 |                                      |                                          |                                               | 0 (0-1)                  | 0 (0-0)                       | 0 (0-0)                           | 0 (0-0)                                | 0 (0-0)            | 0 (0-0)                 | 0 (0-0)                     | 0 (0-0)                          |
| 2011 | Jordan     |                          |                               |                                   |                                        |                                 |                                      |                                          |                                               | 0 (0-1)                  | 0 (0-0)                       | 0 (0-0)                           | 0 (0-0)                                | 0 (0-0)            | 0 (0-0)                 | 0 (0-0)                     | 0 (0-0)                          |
| 2012 | Jordan     |                          |                               |                                   |                                        |                                 |                                      |                                          |                                               | 0 (0-1)                  | 0 (0-0)                       | 0 (0-0)                           | 0 (0-0)                                | 0 (0-0)            | 0 (0-0)                 | 0 (0-0)                     | 0 (0-0)                          |
| 2013 | Jordan     |                          |                               |                                   |                                        |                                 |                                      |                                          |                                               | 0 (0-1)                  | 0 (0-0)                       | 0 (0-0)                           | 0 (0-0)                                | 0 (0-0)            | 0 (0-0)                 | 0 (0-0)                     | 0 (0-0)                          |
| 2014 | Jordan     |                          |                               |                                   |                                        |                                 |                                      |                                          |                                               | 0 (0-1)                  | 0 (0-0)                       | 0 (0-0)                           | 0 (0-0)                                | 0 (0-0)            | 0 (0-0)                 | 0 (0-0)                     | 0 (0-0)                          |
| 2015 | Jordan     |                          |                               |                                   |                                        |                                 |                                      |                                          |                                               | 0 (0-1)                  | 0 (0-0)                       | 0 (0-0)                           | 0 (0-0)                                | 0 (0-0)            | 0 (0-0)                 | 0 (0-0)                     | 0 (0-0)                          |
| 2000 | Kazakhstan | 3270 (2986-3543)         | 0 (0-0)                       | 298 (272-326)                     | 0 (0-0)                                | 18 (16-20)                      | 0 (0-0)                              | 0 (0-0)                                  | 0 (0-0)                                       | 164 (89-249)             | 0 (0-0)                       | 0 (0-0)                           | 0 (0-0)                                | 93 (67-120)        | 0 (0-0)                 | 0 (0-0)                     | 0 (0-0)                          |
| 2001 | Kazakhstan |                          |                               |                                   |                                        |                                 |                                      |                                          |                                               | 156 (102-220)            | 0 (0-0)                       | 0 (0-0)                           | 0 (0-0)                                | 92 (68-117)        | 0 (0-0)                 | 0 (0-0)                     | 0 (0-0)                          |
| 2002 | Kazakhstan |                          |                               |                                   |                                        |                                 |                                      |                                          |                                               | 180 (104-279)            | 0 (0-0)                       | 0 (0-0)                           | 0 (0-0)                                | 10 (0-2)           | 0 (0-0)                 | 0 (0-0)                     | 0 (0-0)                          |
| 2003 | Kazakhstan |                          |                               |                                   |                                        |                                 |                                      |                                          |                                               | 147 (85-220)             | 0 (0-0)                       | 0 (0-0)                           | 0 (0-0)                                | 10 (0-2)           | 0 (0-0)                 | 0 (0-0)                     | 0 (0-0)                          |
| 2004 | Kazakhstan |                          |                               |                                   |                                        |                                 |                                      |                                          |                                               | 142 (80-220)             | 0 (0-0)                       | 0 (0-0)                           | 0 (0-0)                                | 10 (0-2)           | 0 (0-0)                 | 0 (0-0)                     | 0 (0-0)                          |
| 2005 | Kazakhstan |                          |                               |                                   |                                        |                                 |                                      |                                          |                                               | 120 (69-190)             | 0 (0-0)                       | 0 (0-0)                           | 0 (0-0)                                | 10 (0-2)           | 0 (0-0)                 | 0 (0-0)                     | 0 (0-0)                          |
| 2006 | Kazakhstan |                          |                               |                                   |                                        |                                 |                                      |                                          |                                               | 100 (58-159)             | 0 (0-0)                       | 0 (0-0)                           | 0 (0-0)                                | 54 (27-85)         | 0 (0-0)                 | 0 (0-0)                     | 0 (0-0)                          |
| 2007 | Kazakhstan |                          |                               |                                   |                                        |                                 |                                      |                                          |                                               | 171 (103-246)            | 0 (0-0)                       | 0 (0-0)                           | 0 (0-0)                                | 58 (32-100)        | 0 (0-0)                 | 0 (0-0)                     | 0 (0-0)                          |
| 2008 | Kazakhstan |                          |                               |                                   |                                        |                                 |                                      |                                          |                                               | 100 (59-165)             | 0 (0-0)                       | 0 (0-0)                           | 0 (0-0)                                | 34 (20-54)         | 0 (0-0)                 | 0 (0-0)                     | 0 (0-0)                          |
| 2009 | Kazakhstan |                          |                               |                                   |                                        |                                 |                                      |                                          |                                               | 10 (5-24)                | 0 (0-0)                       | 0 (0-0)                           | 0 (0-0)                                | 1 (0-1)            | 0 (0-0)                 | 0 (0-0)                     | 0 (0-0)                          |
| 2010 | Kazakhstan |                          |                               |                                   |                                        |                                 |                                      |                                          |                                               | 14 (2-23)                | 0 (0-0)                       | 0 (0-0)                           | 0 (0-0)                                | 0 (0-0)            | 0 (0-0)                 | 0 (0-0)                     | 0 (0-0)                          |
| 2011 | Kazakhstan |                          |                               |                                   |                                        |                                 |                                      |                                          |                                               | 14 (2-23)                | 0 (0-0)                       | 0 (0-0)                           | 0 (0-0)                                | 0 (0-0)            | 0 (0-0)                 | 0 (0-0)                     | 0 (0-0)                          |
| 2012 | Kazakhstan |                          |                               |                                   |                                        |                                 |                                      |                                          |                                               | 12 (2-1)                 | 0 (0-0)                       | 0 (0-0)                           | 0 (0-0)                                | 4 (0-7)            | 0 (0-0)                 | 0 (0-0)                     | 0 (0-0)                          |
| 2013 | Kazakhstan |                          |                               |                                   |                                        |                                 |                                      |                                          |                                               | 2 (0-2)                  | 0 (0-0)                       | 0 (0-0)                           | 0 (0-0)                                | 0 (0-0)            | 0 (0-0)                 | 0 (0-0)                     | 0 (0-0)                          |
| 2014 | Kazakhstan |                          |                               |                                   |                                        |                                 |                                      |                                          |                                               | 0 (0-0)                  | 0 (0-0)                       | 0 (0-0)                           | 0 (0-0)                                | 0 (0-0)            | 0 (0-0)                 | 0 (0-0)                     | 0 (0-0)                          |
| 2015 | Kazakhstan |                          |                               |                                   |                                        |                                 |                                      |                                          |                                               | 0 (0-0)                  | 0 (0-0)                       | 0 (0-0)                           | 0 (0-0)                                | 0 (0-0)            | 0 (0-0)                 | 0 (0-0)                     | 0 (0-0)                          |
| 2000 | Kenya      | 69 (0-109)               | 0 (0-0)                       | 3 (0-5)                           | 0 (0-0)                                | 18 (11-26)                      | 0 (0-0)                              | 0 (0-0)                                  | 0 (0-0)                                       | 180 (93-301)             | 0 (0-0)                       | 0 (0-0)                           | 0 (0-0)                                | 57 (11-102)        | 0 (0-0)                 | 0 (0-0)                     | 0 (0-0)                          |
| 2001 | Kenya      | 6901 (6127-10310)        | 0 (0-0)                       | 207 (182-232)                     | 0 (0-0)                                | 1687 (1117-2197)                | 375 (244-706)                        | 0 (0-0)                                  | 0 (0-0)                                       | 169 (85-281)             | 0 (0-0)                       | 0 (0-0)                           | 0 (0-0)                                | 33 (19-52)         | 0 (0-0)                 | 0 (0-0)                     | 0 (0-0)                          |
| 2002 | Kenya      |                          |                               |                                   |                                        |                                 |                                      |                                          |                                               | 167 (93-251)             | 0 (0-0)                       | 0 (0-0)                           | 0 (0-0)                                | 31 (18-48)         | 0 (0-0)                 | 0 (0-0)                     | 0 (0-0)                          |
| 2003 | Kenya      |                          |                               |                                   |                                        |                                 |                                      |                                          |                                               | 203 (123-286)            | 0 (0-0)                       | 0 (0-0)                           | 0 (0-0)                                | 34 (20-50)         | 0 (0-0)                 | 0 (0-0)                     | 0 (0-0)                          |
| 2004 | Kenya      |                          |                               |                                   |                                        |                                 |                                      |                                          |                                               | 200 (120-280)            | 0 (0-0)                       | 0 (0-0)                           | 0 (0-0)                                | 31 (18-48)         | 0 (0-0)                 | 0 (0-0)                     | 0 (0-0)                          |
| 2005 | Kenya      |                          |                               |                                   |                                        |                                 |                                      |                                          |                                               | 181 (86-286)             | 0 (0-0)                       | 0 (0-0)                           | 0 (0-0)                                | 29 (16-46)         | 0 (0-0)                 | 0 (0-0)                     | 0 (0-0)                          |
| 2006 | Kenya      |                          |                               |                                   |                                        |                                 |                                      |                                          |                                               | 187 (102-286)            | 0 (0-0)                       | 0 (0-0)                           | 0 (0-0)                                | 29 (16-46)         | 0 (0-0)                 | 0 (0-0)                     | 0 (0-0)                          |
| 2007 | Kenya      |                          |                               |                                   |                                        |                                 |                                      |                                          |                                               | 17 (8-27)                | 0 (0-0)                       | 0 (0-0)                           | 0 (0-0)                                | 3 (0-6)            | 0 (0-0)                 | 0 (0-0)                     | 0 (0-0)                          |
| 2008 | Kenya      |                          |                               |                                   |                                        |                                 |                                      |                                          |                                               | 17 (8-27)                | 0 (0-0)                       | 0 (0-0)                           | 0 (0-0)                                | 3 (0-6)            | 0 (0-0)                 | 0 (0-0)                     | 0 (0-0)                          |
| 2009 | Kenya      |                          |                               |                                   |                                        |                                 |                                      |                                          |                                               | 18 (8-27)                | 0 (0-0)                       | 0 (0-0)                           | 0 (0-0)                                | 3 (0-6)            | 0 (0-0)                 | 0 (0-0)                     | 0 (0-0)                          |
| 2010 | Kenya      |                          |                               |                                   |                                        |                                 |                                      |                                          |                                               | 18 (8-28)                | 0 (0-0)                       | 0 (0-0)                           | 0 (0-0)                                | 3 (0-6)            | 0 (0-0)                 | 0 (0-0)                     | 0 (0-0)                          |
| 2011 | Kenya      |                          |                               |                                   |                                        |                                 |                                      |                                          |                                               | 18 (8-28)                | 0 (0-0)                       | 0 (0-0)                           | 0 (0-0)                                | 3 (0-6)            | 0 (0-0)                 | 0 (0-0)                     | 0 (0-0)                          |
| 2012 | Kenya      |                          |                               |                                   |                                        |                                 |                                      |                                          |                                               | 18 (8-28)                | 0 (0-0)                       | 0 (0-0)                           | 0 (0-0)                                | 3 (0-6)            | 0 (0-0)                 | 0 (0-0)                     | 0 (0-0)                          |
| 2013 | Kenya      |                          |                               |                                   |                                        |                                 |                                      |                                          |                                               | 18 (8-28)                | 0 (0-0)                       | 0 (0-0)                           | 0 (0-0)                                | 3 (0-6)            | 0 (0-0)                 | 0 (0-0)                     | 0 (0-0)                          |
| 2014 | Kenya      |                          |                               |                                   |                                        |                                 |                                      |                                          |                                               | 18 (8-24)                | 0 (0-0)                       | 0 (0-0)                           | 0 (0-0)                                | 3 (0-6)            | 0 (0-0)                 | 0 (0-0)                     | 0 (0-0)                          |
| 2015 | Kenya      |                          |                               |                                   |                                        |                                 |                                      |                                          |                                               | 15 (5-24)                | 0 (0-0)                       | 0 (0-0)                           | 0 (0-0)                                | 3 (0-6)            | 0 (0-0)                 | 0 (0-0)                     | 0 (0-0)                          |
| 2000 | Kiribati   | 120 (114-125)            | 0 (0-0)                       | 20 (18-23)                        | 0 (0-0)                                | 1605 (973-2141)                 | 23 (14-47)                           | 0 (0-0)                                  | 0 (0-0)                                       | 78 (44-106)              | 0 (0-0)                       | 0 (0-0)                           | 0 (0-0)                                | 26 (13-34)         | 0 (0-0)                 | 0 (0-0)                     | 0 (0-0)                          |
| 2001 | Kiribati   |                          |                               |                                   |                                        |                                 |                                      |                                          |                                               | 8 (4-10)                 | 0 (0-0)                       | 0 (0-0)                           | 0 (0-0)                                | 1 (0-3)            | 0 (0-0)                 | 0 (0-0)                     | 0 (0-0)                          |
| 2002 | Kiribati   |                          |                               |                                   |                                        |                                 |                                      |                                          |                                               | 7 (4-9)                  | 0 (0-0)                       | 0 (0-0)                           | 0 (0-0)                                | 21 (13-29)         | 0 (0-0)                 | 0 (0-0)                     | 0 (0-0)                          |
| 2003 | Kiribati   |                          |                               |                                   |                                        |                                 |                                      |                                          |                                               | 6 (4-8)                  | 0 (0-0)                       | 0 (0-0)                           | 0 (0-0)                                | 20 (13-29)         | 0 (0-0)                 | 0 (0-0)                     | 0 (0-0)                          |
| 2004 | Kiribati   |                          |                               |                                   |                                        |                                 |                                      |                                          |                                               | 7 (4-9)                  | 0 (0-0)                       | 0 (0-0)                           | 0 (0-0)                                | 21 (13-29)         | 0 (0-0)                 | 0 (0-0)                     | 0 (0-0)                          |
| 2005 | Kiribati   |                          |                               |                                   |                                        |                                 |                                      |                                          |                                               | 6 (4-8)                  | 0 (0-0)                       | 0 (0-0)                           | 0 (0-0)                                | 21 (13-29)         | 0 (0-0)                 | 0 (0-0)                     | 0 (0-0)                          |
| 2006 | Kiribati   |                          |                               |                                   |                                        |                                 |                                      |                                          |                                               | 6 (4-8)                  | 0 (0-0)                       | 0 (0-0)                           | 0 (0-0)                                | 21 (13-29)         | 0 (0-0)                 | 0 (0-0)                     | 0 (0-0)                          |
| 2007 | Kiribati   |                          |                               |                                   |                                        |                                 |                                      |                                          |                                               | 6 (4-8)                  | 0 (0-0)                       | 0 (0-0)                           | 0 (0-0)                                | 21 (13-29)         | 0 (0-0)                 | 0 (0-0)                     | 0 (0-0)                          |
| 2008 | Kiribati   |                          |                               |                                   |                                        |                                 |                                      |                                          |                                               | 6 (4-8)                  | 0 (0-0)                       | 0 (0-0)                           | 0 (0-0)                                | 21 (13-29)         | 0 (0-0)                 | 0 (0-0)                     | 0 (0-0)                          |
| 2009 | Kiribati   |                          |                               |                                   |                                        |                                 |                                      |                                          |                                               | 6 (4-8)                  | 0 (0-0)                       | 0 (0-0)                           | 0 (0-0)                                | 21 (13-29)         | 0 (0-0)                 | 0 (0-0)                     | 0 (0-0)                          |
| 2010 | Kiribati   |                          |                               |                                   |                                        |                                 |                                      |                                          |                                               | 6 (4-8)                  | 0 (0-0)                       | 0 (0-0)                           | 0 (0-0)                                | 21 (13-29)         | 0 (0-0)                 | 0 (0-0)                     | 0 (0-0)                          |
| 2011 | Kiribati   |                          |                               |                                   |                                        |                                 |                                      |                                          |                                               | 6 (4-8)                  | 0 (0-0)                       | 0 (0-0)                           | 0 (0-0)                                | 21 (13-29)         | 0 (0-0)                 | 0 (0-0)                     | 0 (0-0)                          |
| 2012 | Kiribati   |                          |                               |                                   |                                        |                                 |                                      |                                          |                                               | 6 (4-8)                  | 0 (0-0)                       | 0 (0-0)                           | 0 (0-0)                                | 21 (13-29)         | 0 (0-0)                 | 0 (0-0)                     | 0 (0-0)                          |
| 2013 | Kiribati   |                          |                               |                                   |                                        |                                 |                                      |                                          |                                               | 6 (4-8)                  | 0 (0-0)                       | 0 (0-0)                           | 0 (0-0)                                | 21 (13-29)         | 0 (0-0)                 | 0 (0-0)                     | 0 (0-0)                          |
| 2014 | Kiribati   |                          |                               |                                   |                                        |                                 |                                      |                                          |                                               | 6 (4-8)                  | 0 (0-0)                       | 0 (0-0)                           | 0 (0-0)                                | 21 (13-29)         | 0 (0-0)                 | 0 (0-0)                     | 0 (0-0)                          |
| 2015 | Kiribati   |                          |                               |                                   |                                        |                                 |                                      |                                          |                                               | 6 (4-8)                  | 0 (0-0)                       | 0 (0-0)                           | 0 (0-0)                                | 21 (13-29)         | 0 (0-0)                 |                             |                                  |

















| Year | Country                                   | HB positive cases (CI) | HB prevalence cases, HV (CI) | HB prevalence incidence rate (CI) | HB prevalence incidence rate, HV (CI) | HB severe prevalence cases (CI) | HB severe prevalence cases, HV (CI) | HB severe prevalence incidence rate (CI) | HB severe prevalence incidence rate, HV (CI) | HB meningitis cases (CI) | HB meningitis cases, HV (CI) | HB meningitis incidence rate (CI) | HB meningitis incidence rate, HV (CI) | HB NPM cases (CI) | HB NPM cases, HV (CI) | HB NPM incidence rate (CI) | HB NPM incidence rate, HV (CI) |
|------|-------------------------------------------|------------------------|------------------------------|-----------------------------------|---------------------------------------|---------------------------------|-------------------------------------|------------------------------------------|----------------------------------------------|--------------------------|------------------------------|-----------------------------------|---------------------------------------|-------------------|-----------------------|----------------------------|--------------------------------|
| 2000 | Tajikistan                                | 2465 (2465-2465)       | 0 (0-0)                      | 148 (148-148)                     | 0 (0-0)                               | 481 (478-484)                   | 0 (0-0)                             | 21 (13-33)                               | 0 (0-0)                                      | 105 (102-107)            | 0 (0-0)                      | 67 (62-72)                        | 0 (0-0)                               | 101 (95-107)      | 0 (0-0)               | 12 (12-12)                 | 0 (0-0)                        |
| 2001 | Tajikistan                                | 1599 (1599-1599)       |                              | 149 (149-149)                     |                                       | 401 (397-405)                   |                                     | 46 (39-53)                               |                                              | 101 (97-105)             |                              | 71 (66-76)                        |                                       | 107 (101-113)     |                       | 17 (17-17)                 |                                |
| 2002 | Tajikistan                                |                        |                              |                                   |                                       | 481 (476-486)                   |                                     | 41 (34-47)                               |                                              | 96 (92-100)              |                              | 67 (62-72)                        |                                       | 83 (76-90)        |                       | 16 (16-16)                 |                                |
| 2003 | Tajikistan                                |                        |                              |                                   |                                       | 430 (425-435)                   |                                     | 42 (35-48)                               |                                              | 102 (97-107)             |                              | 72 (67-77)                        |                                       | 107 (101-113)     |                       | 16 (16-16)                 |                                |
| 2004 | Tajikistan                                |                        |                              |                                   |                                       | 405 (400-410)                   |                                     | 48 (41-54)                               |                                              | 101 (96-106)             |                              | 72 (67-77)                        |                                       | 137 (129-145)     |                       | 16 (16-16)                 |                                |
| 2005 | Tajikistan                                |                        |                              |                                   |                                       | 381 (376-386)                   |                                     | 50 (43-57)                               |                                              | 101 (96-106)             |                              | 72 (67-77)                        |                                       | 128 (120-136)     |                       | 16 (16-16)                 |                                |
| 2006 | Tajikistan                                |                        |                              |                                   |                                       | 354 (349-359)                   |                                     | 54 (47-61)                               |                                              | 101 (96-106)             |                              | 72 (67-77)                        |                                       | 123 (115-131)     |                       | 14 (14-14)                 |                                |
| 2007 | Tajikistan                                |                        |                              |                                   |                                       | 304 (300-308)                   |                                     | 57 (50-64)                               |                                              | 101 (96-106)             |                              | 72 (67-77)                        |                                       | 119 (111-127)     |                       | 8 (8-8)                    |                                |
| 2008 | Tajikistan                                |                        |                              |                                   |                                       | 207 (203-211)                   |                                     | 71 (64-78)                               |                                              | 23 (20-26)               |                              | 10 (9-11)                         |                                       | 6 (6-6)           |                       | 8 (8-8)                    |                                |
| 2009 | Tajikistan                                |                        |                              |                                   |                                       | 27 (24-30)                      |                                     | 11 (9-13)                                |                                              | 21 (19-23)               |                              | 11 (10-12)                        |                                       | 3 (3-3)           |                       | 1 (1-1)                    |                                |
| 2010 | Tajikistan                                |                        |                              |                                   |                                       | 26 (24-28)                      |                                     | 11 (9-13)                                |                                              | 11 (10-12)               |                              | 11 (10-12)                        |                                       | 8 (8-8)           |                       | 1 (1-1)                    |                                |
| 2011 | Tajikistan                                |                        |                              |                                   |                                       | 26 (24-28)                      |                                     | 11 (9-13)                                |                                              | 11 (10-12)               |                              | 11 (10-12)                        |                                       | 8 (8-8)           |                       | 1 (1-1)                    |                                |
| 2012 | Tajikistan                                |                        |                              |                                   |                                       | 3 (3-3)                         |                                     | 1 (1-1)                                  |                                              | 1 (1-1)                  |                              | 1 (1-1)                           |                                       | 0 (0-0)           |                       | 0 (0-0)                    |                                |
| 2013 | Tajikistan                                |                        |                              |                                   |                                       | 1 (1-1)                         |                                     | 1 (1-1)                                  |                                              | 1 (1-1)                  |                              | 1 (1-1)                           |                                       | 0 (0-0)           |                       | 0 (0-0)                    |                                |
| 2014 | Tajikistan                                |                        |                              |                                   |                                       | 1 (1-1)                         |                                     | 1 (1-1)                                  |                                              | 1 (1-1)                  |                              | 1 (1-1)                           |                                       | 0 (0-0)           |                       | 0 (0-0)                    |                                |
| 2015 | Tajikistan                                | 4913 (4913-4913)       | 0 (0-0)                      | 132 (132-132)                     | 0 (0-0)                               | 691 (687-695)                   | 0 (0-0)                             | 19 (14-24)                               | 0 (0-0)                                      | 39 (37-41)               | 0 (0-0)                      | 13 (12-14)                        | 0 (0-0)                               | 131 (127-135)     | 0 (0-0)               | 0 (0-0)                    | 0 (0-0)                        |
| 2000 | Thailand                                  |                        |                              |                                   |                                       | 384 (381-387)                   |                                     | 8 (8-8)                                  |                                              | 8 (8-8)                  |                              | 8 (8-8)                           |                                       | 123 (120-126)     |                       | 3 (3-3)                    |                                |
| 2001 | Thailand                                  |                        |                              |                                   |                                       | 346 (343-349)                   |                                     | 8 (8-8)                                  |                                              | 8 (8-8)                  |                              | 8 (8-8)                           |                                       | 116 (113-119)     |                       | 3 (3-3)                    |                                |
| 2002 | Thailand                                  |                        |                              |                                   |                                       | 345 (342-348)                   |                                     | 8 (8-8)                                  |                                              | 8 (8-8)                  |                              | 8 (8-8)                           |                                       | 116 (113-119)     |                       | 3 (3-3)                    |                                |
| 2003 | Thailand                                  |                        |                              |                                   |                                       | 339 (336-342)                   |                                     | 7 (7-7)                                  |                                              | 7 (7-7)                  |                              | 7 (7-7)                           |                                       | 111 (108-114)     |                       | 2 (2-2)                    |                                |
| 2004 | Thailand                                  |                        |                              |                                   |                                       | 330 (327-333)                   |                                     | 7 (7-7)                                  |                                              | 7 (7-7)                  |                              | 7 (7-7)                           |                                       | 109 (106-112)     |                       | 2 (2-2)                    |                                |
| 2005 | Thailand                                  |                        |                              |                                   |                                       | 288 (285-291)                   |                                     | 7 (7-7)                                  |                                              | 7 (7-7)                  |                              | 7 (7-7)                           |                                       | 97 (94-100)       |                       | 2 (2-2)                    |                                |
| 2006 | Thailand                                  |                        |                              |                                   |                                       | 287 (284-290)                   |                                     | 6 (6-6)                                  |                                              | 6 (6-6)                  |                              | 6 (6-6)                           |                                       | 90 (87-93)        |                       | 2 (2-2)                    |                                |
| 2007 | Thailand                                  |                        |                              |                                   |                                       | 247 (244-250)                   |                                     | 6 (6-6)                                  |                                              | 6 (6-6)                  |                              | 6 (6-6)                           |                                       | 71 (68-74)        |                       | 2 (2-2)                    |                                |
| 2008 | Thailand                                  |                        |                              |                                   |                                       | 221 (218-224)                   |                                     | 5 (5-5)                                  |                                              | 5 (5-5)                  |                              | 5 (5-5)                           |                                       | 71 (68-74)        |                       | 2 (2-2)                    |                                |
| 2009 | Thailand                                  |                        |                              |                                   |                                       | 202 (199-205)                   |                                     | 5 (5-5)                                  |                                              | 5 (5-5)                  |                              | 5 (5-5)                           |                                       | 71 (68-74)        |                       | 2 (2-2)                    |                                |
| 2010 | Thailand                                  |                        |                              |                                   |                                       | 196 (193-201)                   |                                     | 5 (5-5)                                  |                                              | 5 (5-5)                  |                              | 5 (5-5)                           |                                       | 67 (64-70)        |                       | 2 (2-2)                    |                                |
| 2011 | Thailand                                  |                        |                              |                                   |                                       | 186 (183-191)                   |                                     | 5 (5-5)                                  |                                              | 5 (5-5)                  |                              | 5 (5-5)                           |                                       | 62 (59-65)        |                       | 2 (2-2)                    |                                |
| 2012 | Thailand                                  |                        |                              |                                   |                                       | 172 (169-175)                   |                                     | 4 (4-4)                                  |                                              | 4 (4-4)                  |                              | 4 (4-4)                           |                                       | 58 (55-61)        |                       | 2 (2-2)                    |                                |
| 2013 | Thailand                                  |                        |                              |                                   |                                       | 161 (158-164)                   |                                     | 4 (4-4)                                  |                                              | 4 (4-4)                  |                              | 4 (4-4)                           |                                       | 54 (51-57)        |                       | 1 (1-1)                    |                                |
| 2014 | Thailand                                  |                        |                              |                                   |                                       | 150 (147-153)                   |                                     | 4 (4-4)                                  |                                              | 4 (4-4)                  |                              | 4 (4-4)                           |                                       | 51 (48-54)        |                       | 1 (1-1)                    |                                |
| 2015 | Thailand                                  | 2950 (2950-2950)       | 0 (0-0)                      | 795 (795-795)                     | 0 (0-0)                               | 934 (934-934)                   | 0 (0-0)                             | 148 (148-148)                            | 0 (0-0)                                      | 171 (171-171)            | 0 (0-0)                      | 11 (11-11)                        | 0 (0-0)                               | 11 (11-11)        | 0 (0-0)               | 1 (1-1)                    | 0 (0-0)                        |
| 2000 | The former Yugoslav Republic of Macedonia |                        |                              |                                   |                                       | 202 (199-205)                   |                                     | 43 (38-47)                               |                                              | 1 (1-1)                  |                              | 1 (1-1)                           |                                       | 6 (6-6)           |                       | 0 (0-0)                    |                                |
| 2001 | The former Yugoslav Republic of Macedonia |                        |                              |                                   |                                       | 19 (19-19)                      |                                     | 14 (12-17)                               |                                              | 6 (6-6)                  |                              | 6 (6-6)                           |                                       | 6 (6-6)           |                       | 1 (1-1)                    |                                |
| 2002 | The former Yugoslav Republic of Macedonia |                        |                              |                                   |                                       | 18 (18-18)                      |                                     | 14 (12-17)                               |                                              | 6 (6-6)                  |                              | 6 (6-6)                           |                                       | 6 (6-6)           |                       | 1 (1-1)                    |                                |
| 2003 | The former Yugoslav Republic of Macedonia |                        |                              |                                   |                                       | 18 (18-18)                      |                                     | 13 (12-14)                               |                                              | 6 (6-6)                  |                              | 6 (6-6)                           |                                       | 6 (6-6)           |                       | 1 (1-1)                    |                                |
| 2004 | The former Yugoslav Republic of Macedonia |                        |                              |                                   |                                       | 17 (17-17)                      |                                     | 12 (12-12)                               |                                              | 6 (6-6)                  |                              | 6 (6-6)                           |                                       | 6 (6-6)           |                       | 1 (1-1)                    |                                |
| 2005 | The former Yugoslav Republic of Macedonia |                        |                              |                                   |                                       | 16 (16-16)                      |                                     | 11 (11-11)                               |                                              | 6 (6-6)                  |                              | 6 (6-6)                           |                                       | 6 (6-6)           |                       | 1 (1-1)                    |                                |
| 2006 | The former Yugoslav Republic of Macedonia |                        |                              |                                   |                                       | 15 (15-15)                      |                                     | 10 (10-10)                               |                                              | 6 (6-6)                  |                              | 6 (6-6)                           |                                       | 6 (6-6)           |                       | 1 (1-1)                    |                                |
| 2007 | The former Yugoslav Republic of Macedonia |                        |                              |                                   |                                       | 14 (14-14)                      |                                     | 9 (9-9)                                  |                                              | 6 (6-6)                  |                              | 6 (6-6)                           |                                       | 6 (6-6)           |                       | 1 (1-1)                    |                                |
| 2008 | The former Yugoslav Republic of Macedonia |                        |                              |                                   |                                       | 13 (13-13)                      |                                     | 8 (8-8)                                  |                                              | 6 (6-6)                  |                              | 6 (6-6)                           |                                       | 6 (6-6)           |                       | 1 (1-1)                    |                                |
| 2009 | The former Yugoslav Republic of Macedonia |                        |                              |                                   |                                       | 12 (12-12)                      |                                     | 7 (7-7)                                  |                                              | 6 (6-6)                  |                              | 6 (6-6)                           |                                       | 6 (6-6)           |                       | 1 (1-1)                    |                                |
| 2010 | The former Yugoslav Republic of Macedonia |                        |                              |                                   |                                       | 11 (11-11)                      |                                     | 6 (6-6)                                  |                                              | 6 (6-6)                  |                              | 6 (6-6)                           |                                       | 6 (6-6)           |                       | 1 (1-1)                    |                                |
| 2011 | The former Yugoslav Republic of Macedonia |                        |                              |                                   |                                       | 10 (10-10)                      |                                     | 5 (5-5)                                  |                                              | 6 (6-6)                  |                              | 6 (6-6)                           |                                       | 6 (6-6)           |                       | 1 (1-1)                    |                                |
| 2012 | The former Yugoslav Republic of Macedonia |                        |                              |                                   |                                       | 9 (9-9)                         |                                     | 4 (4-4)                                  |                                              | 6 (6-6)                  |                              | 6 (6-6)                           |                                       | 6 (6-6)           |                       | 1 (1-1)                    |                                |
| 2013 | The former Yugoslav Republic of Macedonia |                        |                              |                                   |                                       | 8 (8-8)                         |                                     | 3 (3-3)                                  |                                              | 6 (6-6)                  |                              | 6 (6-6)                           |                                       | 6 (6-6)           |                       | 1 (1-1)                    |                                |
| 2014 | The former Yugoslav Republic of Macedonia |                        |                              |                                   |                                       | 7 (7-7)                         |                                     | 2 (2-2)                                  |                                              | 6 (6-6)                  |                              | 6 (6-6)                           |                                       | 6 (6-6)           |                       | 1 (1-1)                    |                                |
| 2015 | The former Yugoslav Republic of Macedonia | 2 (2-2)                | 0 (0-0)                      | 1 (1-1)                           | 0 (0-0)                               | 1 (1-1)                         | 0 (0-0)                             | 0 (0-0)                                  | 0 (0-0)                                      | 0 (0-0)                  | 0 (0-0)                      | 0 (0-0)                           | 0 (0-0)                               | 0 (0-0)           | 0 (0-0)               | 0 (0-0)                    | 0 (0-0)                        |
| 2000 | Timor-Leste                               |                        |                              |                                   |                                       | 2803 (2803-2803)                |                                     | 1637 (1637-1637)                         |                                              | 1 (1-1)                  |                              | 1 (1-1)                           |                                       | 0 (0-0)           |                       | 0 (0-0)                    |                                |
| 2001 | Timor-Leste                               |                        |                              |                                   |                                       | 186 (186-186)                   |                                     | 119 (119-119)                            |                                              | 0 (0-0)                  |                              | 0 (0-0)                           |                                       | 16 (16-16)        |                       | 11 (11-11)                 |                                |
| 2002 | Timor-Leste                               |                        |                              |                                   |                                       | 100 (100-100)                   |                                     | 58 (58-58)                               |                                              | 0 (0-0)                  |                              | 0 (0-0)                           |                                       | 17 (17-17)        |                       | 9 (9-9)                    |                                |
| 2003 | Timor-Leste                               |                        |                              |                                   |                                       | 84 (84-84)                      |                                     | 55 (55-55)                               |                                              | 0 (0-0)                  |                              | 0 (0-0)                           |                                       | 16 (16-16)        |                       | 8 (8-8)                    |                                |
| 2004 | Timor-Leste                               |                        |                              |                                   |                                       | 80 (80-80)                      |                                     | 51 (51-51)                               |                                              | 0 (0-0)                  |                              | 0 (0-0)                           |                                       | 15 (15-15)        |                       | 8 (8-8)                    |                                |
| 2005 | Timor-Leste                               |                        |                              |                                   |                                       | 76 (76-76)                      |                                     | 49 (49-49)                               |                                              | 0 (0-0)                  |                              | 0 (0-0)                           |                                       | 14 (14-14)        |                       | 8 (8-8)                    |                                |
| 2006 | Timor-Leste                               |                        |                              |                                   |                                       | 67 (67-67)                      |                                     | 47 (47-47)                               |                                              | 0 (0-0)                  |                              | 0 (0-0)                           |                                       | 13 (13-13)        |                       | 8 (8-8)                    |                                |
| 2007 | Timor-Leste                               |                        |                              |                                   |                                       | 58 (58-58)                      |                                     | 45 (45-45)                               |                                              | 0 (0-0)                  |                              | 0 (0-0)                           |                                       | 12 (12-12)        |                       | 8 (8-8)                    |                                |
| 2008 | Timor-Leste                               |                        |                              |                                   |                                       | 49 (49-49)                      |                                     | 43 (43-43)                               |                                              | 0 (0-0)                  |                              | 0 (0-0)                           |                                       | 11 (11-11)        |                       | 8 (8-8)                    |                                |
| 2009 | Timor-Leste                               |                        |                              |                                   |                                       | 40 (40-40)                      |                                     | 41 (41-41)                               |                                              | 0 (0-0)                  |                              | 0 (0-0)                           |                                       | 10 (10-10)        |                       | 8 (8-8)                    |                                |
| 2010 | Timor-Leste                               |                        |                              |                                   |                                       | 32 (32-32)                      |                                     | 39 (39-39)                               |                                              | 0 (0-0)                  |                              | 0 (0-0)                           |                                       | 9 (9-9)           |                       | 8 (8-8)                    |                                |
| 2011 | Timor-Leste                               |                        |                              |                                   |                                       | 24 (24-24)                      |                                     | 37 (37-37)                               |                                              | 0 (0-0)                  |                              | 0 (0-0)                           |                                       | 8 (8-8)           |                       | 8 (8-8)                    |                                |
| 2012 | Timor-Leste                               |                        |                              |                                   |                                       | 16 (16-16)                      |                                     | 35 (35-35)                               |                                              | 0 (0-0)                  |                              | 0 (0-0)                           |                                       | 7 (7-7)           |                       | 8 (8-8)                    |                                |
| 2013 | Timor-Leste                               |                        |                              |                                   |                                       | 8 (8-8)                         |                                     | 33 (33-33)                               |                                              | 0 (0-0)                  |                              | 0 (0-0)                           |                                       | 6 (6-6)           |                       | 8 (8-8)                    |                                |
| 2014 | Timor-Leste                               |                        |                              |                                   |                                       | 1 (1-1)                         |                                     | 31 (31-31)                               |                                              | 0 (0-0)                  |                              | 0 (0-0)                           |                                       | 5 (5-5)           |                       | 8 (8-8)                    |                                |
| 2015 | Timor-Leste                               | 288 (288-288)          | 0 (0-0)                      | 176 (176-176)                     | 0 (0-0)                               | 58 (58-58)                      | 0 (0-0)                             | 28 (28-28)                               | 0 (0-0)                                      | 1 (1-1)                  | 0 (0-0)                      | 1 (1-1)                           | 0 (0-0)                               | 4 (4-4)           | 0 (0-0)               | 2 (2-2)                    | 0 (0-0)                        |
| 2000 | Togo                                      |                        |                              |                                   |                                       | 2044 (2044-2044)                |                                     | 1388 (1388-1388)                         |                                              | 232 (232-232)            |                              | 232 (232-232)                     |                                       | 49 (49-49)        |                       | 1 (1-1)                    |                                |
| 2001 | Togo                                      |                        |                              |                                   |                                       | 236 (236-236)                   |                                     | 149 (149-149)                            |                                              | 236 (236-236)            |                              | 236 (236-236)                     |                                       | 41 (41-41)        |                       | 1 (1-1)                    |                                |
| 2002 | Togo                                      |                        |                              |                                   |                                       | 236 (236-236)                   |                                     | 149 (149-149)                            |                                              | 236 (236-236)            |                              | 236 (236-236)                     |                                       | 41 (41-41)        |                       | 1 (1-1)                    |                                |
| 2003 | Togo                                      |                        |                              |                                   |                                       | 236 (236-236)                   |                                     | 149 (149-149)                            |                                              | 236 (236-236)            |                              | 236 (236-236)                     |                                       | 41 (41-41)        |                       | 1 (1-1)                    |                                |
| 2004 | Togo                                      |                        |                              |                                   |                                       | 236 (236-236)                   |                                     | 149 (149-149)                            |                                              | 236 (236-236)            |                              | 236 (236-236)                     |                                       | 41 (41-41)        |                       | 1 (1-1)                    |                                |
| 2005 | Togo                                      |                        |                              |                                   |                                       | 236 (236-236)                   |                                     | 149 (149-149)                            |                                              | 236 (236-236)            |                              | 236 (236-236)                     |                                       | 41 (41-41)        |                       | 1 (1-1)                    |                                |
| 2006 | Togo                                      |                        |                              |                                   |                                       | 236 (236-236)                   |                                     | 149 (149-149)                            |                                              | 236 (236-236)            |                              | 236 (236-236)                     |                                       | 41 (41-41)        |                       | 1 (1-1)                    |                                |
| 2007 | Togo                                      |                        |                              |                                   |                                       | 236 (236-236)                   |                                     | 149 (149-149)                            |                                              | 236 (236-236)            |                              | 236 (236-236)                     |                                       | 41 (41-41)        |                       | 1 (1-1)                    |                                |
| 2008 | Togo                                      |                        |                              |                                   |                                       | 206 (206-206)                   |                                     | 131 (131-131)                            |                                              | 21 (21-21)               |                              | 21 (21-21)                        |                                       | 35 (35-35)        |                       | 4 (4-4)                    |                                |
| 2009 | Togo                                      |                        |                              |                                   |                                       | 168 (168-168)                   |                                     | 104 (104-104)                            |                                              | 21 (21-21)               |                              | 21 (21-21)                        |                                       | 31 (31-31)        |                       | 4 (4-4)                    |                                |
| 2010 | Togo                                      |                        |                              |                                   |                                       | 168 (168-168)                   |                                     | 104 (104-104)                            |                                              | 21 (21-21)               |                              | 21 (21-21)                        |                                       | 31 (31-31)        |                       | 4 (4-4)                    |                                |
| 2011 | Togo                                      |                        |                              |                                   |                                       | 168 (168-168)                   |                                     | 104 (104-104)                            |                                              | 21 (21-21)               |                              | 21 (21-21)                        |                                       |                   |                       |                            |                                |



| Year | Country                  | HB pneumonia cases (CI) | HB pneumonia cases, MV (CI) | HB pneumonia incidence rate (CI) | HB pneumonia incidence rate, MV (CI) | HB severe pneumonia cases (CI) | HB severe pneumonia cases, MV (CI) | HB severe pneumonia incidence rate (CI) | HB severe pneumonia incidence rate, MV (CI) | HB meningitis cases (CI) | HB meningitis cases, MV (CI) | HB meningitis incidence rate (CI) | HB meningitis incidence rate, MV (CI) | HB NPMR cases (CI) | HB NPMR cases, MV (CI) | HB NPMR incidence rate (CI) | HB NPMR incidence rate, MV (CI) |
|------|--------------------------|-------------------------|-----------------------------|----------------------------------|--------------------------------------|--------------------------------|------------------------------------|-----------------------------------------|---------------------------------------------|--------------------------|------------------------------|-----------------------------------|---------------------------------------|--------------------|------------------------|-----------------------------|---------------------------------|
| 2000 | Tuvalu                   | 0 (0)                   | 0 (0)                       | 0 (0)                            | 0 (0)                                | 0 (0)                          | 0 (0)                              | 0 (0)                                   | 0 (0)                                       | 0 (0)                    | 0 (0)                        | 0 (0)                             | 0 (0)                                 | 0 (0)              | 0 (0)                  | 0 (0)                       | 0 (0)                           |
| 2001 | Tuvalu                   | 0 (0)                   | 0 (0)                       | 0 (0)                            | 0 (0)                                | 0 (0)                          | 0 (0)                              | 0 (0)                                   | 0 (0)                                       | 0 (0)                    | 0 (0)                        | 0 (0)                             | 0 (0)                                 | 0 (0)              | 0 (0)                  | 0 (0)                       | 0 (0)                           |
| 2002 | Tuvalu                   | 0 (0)                   | 0 (0)                       | 0 (0)                            | 0 (0)                                | 0 (0)                          | 0 (0)                              | 0 (0)                                   | 0 (0)                                       | 0 (0)                    | 0 (0)                        | 0 (0)                             | 0 (0)                                 | 0 (0)              | 0 (0)                  | 0 (0)                       | 0 (0)                           |
| 2003 | Tuvalu                   | 0 (0)                   | 0 (0)                       | 0 (0)                            | 0 (0)                                | 0 (0)                          | 0 (0)                              | 0 (0)                                   | 0 (0)                                       | 0 (0)                    | 0 (0)                        | 0 (0)                             | 0 (0)                                 | 0 (0)              | 0 (0)                  | 0 (0)                       | 0 (0)                           |
| 2004 | Tuvalu                   | 0 (0)                   | 0 (0)                       | 0 (0)                            | 0 (0)                                | 0 (0)                          | 0 (0)                              | 0 (0)                                   | 0 (0)                                       | 0 (0)                    | 0 (0)                        | 0 (0)                             | 0 (0)                                 | 0 (0)              | 0 (0)                  | 0 (0)                       | 0 (0)                           |
| 2005 | Tuvalu                   | 0 (0)                   | 0 (0)                       | 0 (0)                            | 0 (0)                                | 0 (0)                          | 0 (0)                              | 0 (0)                                   | 0 (0)                                       | 0 (0)                    | 0 (0)                        | 0 (0)                             | 0 (0)                                 | 0 (0)              | 0 (0)                  | 0 (0)                       | 0 (0)                           |
| 2006 | Tuvalu                   | 0 (0)                   | 0 (0)                       | 0 (0)                            | 0 (0)                                | 0 (0)                          | 0 (0)                              | 0 (0)                                   | 0 (0)                                       | 0 (0)                    | 0 (0)                        | 0 (0)                             | 0 (0)                                 | 0 (0)              | 0 (0)                  | 0 (0)                       | 0 (0)                           |
| 2007 | Tuvalu                   | 0 (0)                   | 0 (0)                       | 0 (0)                            | 0 (0)                                | 0 (0)                          | 0 (0)                              | 0 (0)                                   | 0 (0)                                       | 0 (0)                    | 0 (0)                        | 0 (0)                             | 0 (0)                                 | 0 (0)              | 0 (0)                  | 0 (0)                       | 0 (0)                           |
| 2008 | Tuvalu                   | 0 (0)                   | 0 (0)                       | 0 (0)                            | 0 (0)                                | 0 (0)                          | 0 (0)                              | 0 (0)                                   | 0 (0)                                       | 0 (0)                    | 0 (0)                        | 0 (0)                             | 0 (0)                                 | 0 (0)              | 0 (0)                  | 0 (0)                       | 0 (0)                           |
| 2009 | Tuvalu                   | 0 (0)                   | 0 (0)                       | 0 (0)                            | 0 (0)                                | 0 (0)                          | 0 (0)                              | 0 (0)                                   | 0 (0)                                       | 0 (0)                    | 0 (0)                        | 0 (0)                             | 0 (0)                                 | 0 (0)              | 0 (0)                  | 0 (0)                       | 0 (0)                           |
| 2010 | Tuvalu                   | 0 (0)                   | 0 (0)                       | 0 (0)                            | 0 (0)                                | 0 (0)                          | 0 (0)                              | 0 (0)                                   | 0 (0)                                       | 0 (0)                    | 0 (0)                        | 0 (0)                             | 0 (0)                                 | 0 (0)              | 0 (0)                  | 0 (0)                       | 0 (0)                           |
| 2011 | Tuvalu                   | 0 (0)                   | 0 (0)                       | 0 (0)                            | 0 (0)                                | 0 (0)                          | 0 (0)                              | 0 (0)                                   | 0 (0)                                       | 0 (0)                    | 0 (0)                        | 0 (0)                             | 0 (0)                                 | 0 (0)              | 0 (0)                  | 0 (0)                       | 0 (0)                           |
| 2012 | Tuvalu                   | 0 (0)                   | 0 (0)                       | 0 (0)                            | 0 (0)                                | 0 (0)                          | 0 (0)                              | 0 (0)                                   | 0 (0)                                       | 0 (0)                    | 0 (0)                        | 0 (0)                             | 0 (0)                                 | 0 (0)              | 0 (0)                  | 0 (0)                       | 0 (0)                           |
| 2013 | Tuvalu                   | 0 (0)                   | 0 (0)                       | 0 (0)                            | 0 (0)                                | 0 (0)                          | 0 (0)                              | 0 (0)                                   | 0 (0)                                       | 0 (0)                    | 0 (0)                        | 0 (0)                             | 0 (0)                                 | 0 (0)              | 0 (0)                  | 0 (0)                       | 0 (0)                           |
| 2014 | Tuvalu                   | 0 (0)                   | 0 (0)                       | 0 (0)                            | 0 (0)                                | 0 (0)                          | 0 (0)                              | 0 (0)                                   | 0 (0)                                       | 0 (0)                    | 0 (0)                        | 0 (0)                             | 0 (0)                                 | 0 (0)              | 0 (0)                  | 0 (0)                       | 0 (0)                           |
| 2015 | Tuvalu                   | 0 (0)                   | 0 (0)                       | 0 (0)                            | 0 (0)                                | 0 (0)                          | 0 (0)                              | 0 (0)                                   | 0 (0)                                       | 0 (0)                    | 0 (0)                        | 0 (0)                             | 0 (0)                                 | 0 (0)              | 0 (0)                  | 0 (0)                       | 0 (0)                           |
| 2000 | Uganda                   | 67563 (61703-74022)     | 0 (0)                       | 1554 (1524-1584)                 | 0 (0)                                | 1274 (1214-1334)               | 0 (0)                              | 274 (264-284)                           | 0 (0)                                       | 2414 (2364-2464)         | 0 (0)                        | 73 (69-77)                        | 0 (0)                                 | 58 (52-64)         | 0 (0)                  | 0 (0)                       | 0 (0)                           |
| 2001 | Uganda                   |                         |                             |                                  |                                      |                                |                                    |                                         |                                             | 3862 (3802-3922)         |                              | 19 (17-21)                        |                                       | 879 (859-899)      |                        | 12 (9-16)                   |                                 |
| 2002 | Uganda                   |                         |                             |                                  |                                      |                                |                                    |                                         |                                             | 2922 (2862-2982)         |                              | 15 (13-17)                        |                                       | 93 (89-97)         |                        | 13 (9-17)                   |                                 |
| 2003 | Uganda                   |                         |                             |                                  |                                      |                                |                                    |                                         |                                             | 3212 (3152-3272)         |                              | 16 (14-18)                        |                                       | 102 (98-106)       |                        | 14 (10-18)                  |                                 |
| 2004 | Uganda                   |                         |                             |                                  |                                      |                                |                                    |                                         |                                             | 438 (432-444)            |                              | 6 (5-7)                           |                                       | 70 (66-74)         |                        | 1 (1)                       |                                 |
| 2005 | Uganda                   |                         |                             |                                  |                                      |                                |                                    |                                         |                                             | 148 (142-154)            |                              | 2 (2)                             |                                       | 74 (70-78)         |                        | 1 (1)                       |                                 |
| 2006 | Uganda                   |                         |                             |                                  |                                      |                                |                                    |                                         |                                             | 411 (405-417)            |                              | 7 (6-8)                           |                                       | 71 (67-75)         |                        | 1 (1)                       |                                 |
| 2007 | Uganda                   |                         |                             |                                  |                                      |                                |                                    |                                         |                                             | 33 (33)                  |                              | 0 (0)                             |                                       | 0 (0)              |                        | 0 (0)                       |                                 |
| 2008 | Uganda                   |                         |                             |                                  |                                      |                                |                                    |                                         |                                             | 33 (33)                  |                              | 0 (0)                             |                                       | 0 (0)              |                        | 0 (0)                       |                                 |
| 2009 | Uganda                   |                         |                             |                                  |                                      |                                |                                    |                                         |                                             | 25 (25)                  |                              | 0 (0)                             |                                       | 0 (0)              |                        | 0 (0)                       |                                 |
| 2010 | Uganda                   |                         |                             |                                  |                                      |                                |                                    |                                         |                                             | 32 (32)                  |                              | 0 (0)                             |                                       | 0 (0)              |                        | 0 (0)                       |                                 |
| 2011 | Uganda                   |                         |                             |                                  |                                      |                                |                                    |                                         |                                             | 33 (33)                  |                              | 0 (0)                             |                                       | 0 (0)              |                        | 0 (0)                       |                                 |
| 2012 | Uganda                   |                         |                             |                                  |                                      |                                |                                    |                                         |                                             | 33 (33)                  |                              | 0 (0)                             |                                       | 0 (0)              |                        | 0 (0)                       |                                 |
| 2013 | Uganda                   |                         |                             |                                  |                                      |                                |                                    |                                         |                                             | 34 (34)                  |                              | 0 (0)                             |                                       | 0 (0)              |                        | 0 (0)                       |                                 |
| 2014 | Uganda                   |                         |                             |                                  |                                      |                                |                                    |                                         |                                             | 36 (36)                  |                              | 0 (0)                             |                                       | 0 (0)              |                        | 0 (0)                       |                                 |
| 2015 | Uganda                   | 789 (779-799)           | 30 (27-33)                  | 11 (10)-18                       | 0 (0)                                | 148 (143-153)                  | 6 (5)-11                           | 2 (1)-4                                 | 0 (0)                                       | 33 (33)                  | 1 (1)-2                      | 1 (1)-2                           | 0 (0)                                 | 11 (11)            | 0 (0)                  | 0 (0)                       | 0 (0)                           |
| 2000 | Ukraine                  | 6124 (5775-6532)        |                             | 296 (272-320)                    |                                      | 1964 (1783-2164)               |                                    | 92 (85-107)                             |                                             | 28 (28)                  |                              | 1 (1)                             |                                       | 58 (52-64)         |                        | 0 (0)                       | 0 (0)                           |
| 2001 | Ukraine                  |                         |                             |                                  |                                      |                                |                                    |                                         |                                             | 209 (204-214)            |                              | 10 (9-12)                         |                                       | 71 (67-75)         |                        | 3 (1-7)                     |                                 |
| 2002 | Ukraine                  |                         |                             |                                  |                                      |                                |                                    |                                         |                                             | 164 (162-166)            |                              | 8 (7-9)                           |                                       | 52 (48-56)         |                        | 2 (1-6)                     |                                 |
| 2003 | Ukraine                  |                         |                             |                                  |                                      |                                |                                    |                                         |                                             | 189 (185-193)            |                              | 9 (7-12)                          |                                       | 57 (53-61)         |                        | 3 (1-6)                     |                                 |
| 2004 | Ukraine                  |                         |                             |                                  |                                      |                                |                                    |                                         |                                             | 106 (102-110)            |                              | 5 (5-6)                           |                                       | 32 (28-36)         |                        | 2 (1-6)                     |                                 |
| 2005 | Ukraine                  |                         |                             |                                  |                                      |                                |                                    |                                         |                                             | 194 (189-199)            |                              | 8 (7-10)                          |                                       | 52 (48-56)         |                        | 3 (1-6)                     |                                 |
| 2006 | Ukraine                  |                         |                             |                                  |                                      |                                |                                    |                                         |                                             | 179 (174-184)            |                              | 8 (7-10)                          |                                       | 37 (33-41)         |                        | 2 (1-6)                     |                                 |
| 2007 | Ukraine                  |                         |                             |                                  |                                      |                                |                                    |                                         |                                             | 41 (37-45)               |                              | 2 (1)-4                           |                                       | 14 (10-18)         |                        | 1 (1)-3                     |                                 |
| 2008 | Ukraine                  |                         |                             |                                  |                                      |                                |                                    |                                         |                                             | 28 (28)                  |                              | 0 (0)                             |                                       | 0 (0)              |                        | 0 (0)                       |                                 |
| 2009 | Ukraine                  |                         |                             |                                  |                                      |                                |                                    |                                         |                                             | 31 (31)                  |                              | 0 (0)                             |                                       | 0 (0)              |                        | 0 (0)                       |                                 |
| 2010 | Ukraine                  |                         |                             |                                  |                                      |                                |                                    |                                         |                                             | 37 (37)                  |                              | 0 (0)                             |                                       | 13 (13)            |                        | 0 (0)                       |                                 |
| 2011 | Ukraine                  |                         |                             |                                  |                                      |                                |                                    |                                         |                                             | 39 (39)                  |                              | 0 (0)                             |                                       | 33 (33)            |                        | 0 (0)                       |                                 |
| 2012 | Ukraine                  |                         |                             |                                  |                                      |                                |                                    |                                         |                                             | 2 (1)                    |                              | 0 (0)                             |                                       | 0 (0)              |                        | 0 (0)                       |                                 |
| 2013 | Ukraine                  |                         |                             |                                  |                                      |                                |                                    |                                         |                                             | 2 (1)                    |                              | 0 (0)                             |                                       | 0 (0)              |                        | 0 (0)                       |                                 |
| 2014 | Ukraine                  |                         |                             |                                  |                                      |                                |                                    |                                         |                                             | 34 (34)                  |                              | 0 (0)                             |                                       | 12 (12)            |                        | 0 (0)                       | 0 (0)                           |
| 2015 | Ukraine                  | 1500 (1416-1533)        | 8 (8)-14                    | 64 (64)-106                      | 0 (0)                                | 482 (482-472)                  | 3 (3)-5                            | 20 (12)-44                              | 0 (0)                                       | 28 (28)                  | 0 (0)-2                      | 0 (0)                             | 0 (0)                                 | 12 (12)            | 0 (0)                  | 0 (0)                       | 0 (0)                           |
| 2000 | United Arab Emirates     | 350 (369-432)           |                             | 175 (165-185)                    |                                      | 58 (53-62)                     |                                    | 22 (12)-44                              |                                             | 3 (1)                    |                              | 1 (1)                             |                                       | 0 (0)              |                        | 0 (0)                       | 0 (0)                           |
| 2001 | United Arab Emirates     |                         |                             |                                  |                                      |                                |                                    |                                         |                                             | 3 (1)                    |                              | 1 (1)                             |                                       | 0 (0)              |                        | 0 (0)                       | 0 (0)                           |
| 2002 | United Arab Emirates     |                         |                             |                                  |                                      |                                |                                    |                                         |                                             | 2 (1)                    |                              | 0 (0)                             |                                       | 0 (0)              |                        | 0 (0)                       | 0 (0)                           |
| 2003 | United Arab Emirates     |                         |                             |                                  |                                      |                                |                                    |                                         |                                             | 2 (1)                    |                              | 0 (0)                             |                                       | 0 (0)              |                        | 0 (0)                       | 0 (0)                           |
| 2004 | United Arab Emirates     |                         |                             |                                  |                                      |                                |                                    |                                         |                                             | 0 (0)                    |                              | 0 (0)                             |                                       | 0 (0)              |                        | 0 (0)                       | 0 (0)                           |
| 2005 | United Arab Emirates     |                         |                             |                                  |                                      |                                |                                    |                                         |                                             | 0 (0)                    |                              | 0 (0)                             |                                       | 0 (0)              |                        | 0 (0)                       | 0 (0)                           |
| 2006 | United Arab Emirates     |                         |                             |                                  |                                      |                                |                                    |                                         |                                             | 0 (0)                    |                              | 0 (0)                             |                                       | 0 (0)              |                        | 0 (0)                       | 0 (0)                           |
| 2007 | United Arab Emirates     |                         |                             |                                  |                                      |                                |                                    |                                         |                                             | 0 (0)                    |                              | 0 (0)                             |                                       | 0 (0)              |                        | 0 (0)                       | 0 (0)                           |
| 2008 | United Arab Emirates     |                         |                             |                                  |                                      |                                |                                    |                                         |                                             | 0 (0)                    |                              | 0 (0)                             |                                       | 0 (0)              |                        | 0 (0)                       | 0 (0)                           |
| 2009 | United Arab Emirates     |                         |                             |                                  |                                      |                                |                                    |                                         |                                             | 0 (0)                    |                              | 0 (0)                             |                                       | 0 (0)              |                        | 0 (0)                       | 0 (0)                           |
| 2010 | United Arab Emirates     |                         |                             |                                  |                                      |                                |                                    |                                         |                                             | 0 (0)                    |                              | 0 (0)                             |                                       | 0 (0)              |                        | 0 (0)                       | 0 (0)                           |
| 2011 | United Arab Emirates     |                         |                             |                                  |                                      |                                |                                    |                                         |                                             | 0 (0)                    |                              | 0 (0)                             |                                       | 0 (0)              |                        | 0 (0)                       | 0 (0)                           |
| 2012 | United Arab Emirates     |                         |                             |                                  |                                      |                                |                                    |                                         |                                             | 0 (0)                    |                              | 0 (0)                             |                                       | 0 (0)              |                        | 0 (0)                       | 0 (0)                           |
| 2013 | United Arab Emirates     |                         |                             |                                  |                                      |                                |                                    |                                         |                                             | 0 (0)                    |                              | 0 (0)                             |                                       | 0 (0)              |                        | 0 (0)                       | 0 (0)                           |
| 2014 | United Arab Emirates     |                         |                             |                                  |                                      |                                |                                    |                                         |                                             | 0 (0)                    |                              | 0 (0)                             |                                       | 0 (0)              |                        | 0 (0)                       | 0 (0)                           |
| 2015 | United Arab Emirates     | 34 (34)-50              | 0 (0)                       | 7 (6)-11                         | 0 (0)                                | 6 (6)-13                       | 0 (0)                              | 1 (1)-3                                 | 0 (0)                                       | 0 (0)                    | 0 (0)                        | 0 (0)                             | 0 (0)                                 | 0 (0)              | 0 (0)                  | 0 (0)                       | 0 (0)                           |
| 2000 | United Kingdom           | 74 (74)-92              |                             | 1 (1)-5                          |                                      | 0 (0)                          |                                    | 0 (0)                                   |                                             | 0 (0)                    |                              | 0 (0)                             |                                       | 0 (0)              |                        | 0 (0)                       | 0 (0)                           |
| 2001 | United Kingdom           |                         |                             |                                  |                                      |                                |                                    |                                         |                                             | 1 (1)                    |                              | 0 (0)                             |                                       | 0 (0)              |                        | 0 (0)                       | 0 (0)                           |
| 2002 | United Kingdom           |                         |                             |                                  |                                      |                                |                                    |                                         |                                             | 7 (7)-14                 |                              | 2 (1)-5                           |                                       | 0 (0)              |                        | 0 (0)                       | 0 (0)                           |
| 2003 | United Kingdom           |                         |                             |                                  |                                      |                                |                                    |                                         |                                             | 6 (6)-12                 |                              | 2 (1)-5                           |                                       | 0 (0)              |                        | 0 (0)                       | 0 (0)                           |
| 2004 | United Kingdom           |                         |                             |                                  |                                      |                                |                                    |                                         |                                             | 7 (7)-13                 |                              | 2 (1)-5                           |                                       | 0 (0)              |                        | 0 (0)                       | 0 (0)                           |
| 2005 | United Kingdom           |                         |                             |                                  |                                      |                                |                                    |                                         |                                             | 0 (0)                    |                              | 0 (0)                             |                                       | 0 (0)              |                        | 0 (0)                       | 0 (0)                           |
| 2006 | United Kingdom           |                         |                             |                                  |                                      |                                |                                    |                                         |                                             | 0 (0)                    |                              | 0 (0)                             |                                       | 0 (0)              |                        | 0 (0)                       | 0 (0)                           |
| 2007 | United Kingdom           |                         |                             |                                  |                                      |                                |                                    |                                         |                                             | 0 (0)                    |                              | 0 (0)                             |                                       | 0 (0)              |                        | 0 (0)                       | 0 (0)                           |
| 2008 | United Kingdom           |                         |                             |                                  |                                      |                                |                                    |                                         |                                             | 0 (0)                    |                              | 0 (0)                             |                                       | 0 (0)              |                        | 0 (0)                       | 0 (0)                           |
| 2009 | United Kingdom           |                         |                             |                                  |                                      |                                |                                    |                                         |                                             | 0 (0)                    |                              | 0 (0)                             |                                       | 0 (0)              |                        | 0 (0)                       | 0 (0)                           |
| 2010 | United Kingdom           |                         |                             |                                  |                                      |                                |                                    |                                         |                                             | 0 (0)                    |                              | 0 (0)                             |                                       | 0 (0)              |                        | 0 (0)                       | 0 (0)                           |
| 2011 | United Kingdom           |                         |                             |                                  |                                      |                                |                                    |                                         |                                             | 0 (0)                    |                              | 0 (0)                             |                                       | 0 (0)              |                        | 0 (0)                       | 0 (0)                           |
| 2012 | United Kingdom           |                         |                             |                                  |                                      |                                |                                    |                                         |                                             | 0 (0)                    |                              | 0 (0)                             |                                       | 0 (0)              |                        | 0 (0)                       | 0 (0)                           |
| 2013 | United Kingdom           |                         |                             |                                  |                                      |                                |                                    |                                         |                                             | 0 (0)                    |                              | 0 (0)                             |                                       | 0 (0)              |                        | 0 (0)                       | 0 (0)                           |
| 2014 | United Kingdom           |                         |                             |                                  |                                      |                                |                                    |                                         |                                             | 0 (0)                    |                              | 0 (0)                             |                                       | 0 (0)              |                        | 0 (0)                       | 0 (0)                           |
| 2015 | United Kingdom           | 30 (27-33)              | 0 (0)                       | 1 (1)-3                          | 0 (0)                                | 0 (0)                          | 0 (0)                              | 0 (0)                                   | 0 (0)                                       | 0 (0)                    | 0 (0)                        | 0 (0)                             | 0 (0)                                 | 0 (0)              | 0 (0)                  | 0 (0)                       | 0 (0)                           |
| 2000 | United States of America | 6374 (5710-7037)        |                             | 1381 (1294-1472)                 |                                      | 16328 (15140-17506)            |                                    | 262 (237-287)                           |                                             | 3683 (3567-3799)         |                              | 87 (82-92)                        |                                       | 669 (639-699)      |                        | 11 (11)-17                  |                                 |
| 2001 | United States of America |                         |                             |                                  |                                      |                                |                                    |                                         |                                             | 3761 (3680-3842)         |                              | 8 (7)-10                          |                                       | 681 (656-706)      |                        | 11 (11)-17                  |                                 |
| 2002 | United States of America |                         |                             |                                  |                                      |                                |                                    |                                         |                                             | 3643 (3562-3724)         |                              | 9 (7)-11                          |                                       | 59 (57-61)         |                        | 10 (10)-16                  |                                 |
| 2003 | United States of America |                         |                             |                                  |                                      |                                |                                    |                                         |                                             | 3754 (3704-3804)         |                              | 9 (8)-11                          |                                       | 638 (628-648)      |                        | 9 (10)-16                   |                                 |
| 2004 |                          |                         |                             |                                  |                                      |                                |                                    |                                         |                                             |                          |                              |                                   |                                       |                    |                        |                             |                                 |

| Year | Country  | HB pneumonia cases (CI) | HB pneumonia cases, MV (CI) | HB pneumonia incidence rate (CI) | HB pneumonia incidence rate, MV (CI) | HB severe pneumonia cases (CI) | HB severe pneumonia cases, MV (CI) | HB severe pneumonia incidence rate (CI) | HB severe pneumonia incidence rate, MV (CI) | HB meningitis cases (CI) | HB meningitis cases, MV (CI) | HB meningitis incidence rate (CI) | HB meningitis incidence rate, MV (CI) | HB NPM cases (CI) | HB NPM cases, MV (CI) | HB NPM incidence rate (CI) | HB NPM incidence rate, MV (CI) |
|------|----------|-------------------------|-----------------------------|----------------------------------|--------------------------------------|--------------------------------|------------------------------------|-----------------------------------------|---------------------------------------------|--------------------------|------------------------------|-----------------------------------|---------------------------------------|-------------------|-----------------------|----------------------------|--------------------------------|
| 2001 | Viet Nam | 762 (20-250)            |                             |                                  |                                      | 100 (20-149)                   |                                    |                                         |                                             | 102 (20-250)             |                              | 9 (2-15)                          |                                       | 189 (20-300)      |                       | 1 (0-1)                    |                                |
| 2002 | Viet Nam | 100 (24-269)            |                             |                                  |                                      | 100 (24-269)                   |                                    | 19 (4-15)                               |                                             | 100 (24-269)             |                              | 19 (4-15)                         |                                       | 209 (21-327)      |                       | 2 (1-5)                    |                                |
| 2003 | Viet Nam | 206 (26-109)            |                             |                                  |                                      | 206 (26-109)                   |                                    | 11 (4-7)                                |                                             | 206 (26-109)             |                              | 11 (4-7)                          |                                       | 246 (21-315)      |                       | 4 (1-6)                    |                                |
| 2004 | Viet Nam | 813 (103-1334)          |                             |                                  |                                      | 813 (103-1334)                 |                                    | 12 (2-23)                               |                                             | 813 (103-1334)           |                              | 12 (2-23)                         |                                       | 274 (22-450)      |                       | 4 (1-7)                    |                                |
| 2005 | Viet Nam | 807 (103-1443)          |                             |                                  |                                      | 807 (103-1443)                 |                                    | 14 (2-23)                               |                                             | 807 (103-1443)           |                              | 14 (2-23)                         |                                       | 302 (24-493)      |                       | 5 (1-7)                    |                                |
| 2006 | Viet Nam | 906 (206-1447)          |                             |                                  |                                      | 906 (206-1447)                 |                                    | 13 (2-23)                               |                                             | 906 (206-1447)           |                              | 13 (2-23)                         |                                       | 312 (25-511)      |                       | 5 (1-7)                    |                                |
| 2007 | Viet Nam | 805 (103-1443)          |                             |                                  |                                      | 805 (103-1443)                 |                                    | 13 (2-23)                               |                                             | 805 (103-1443)           |                              | 13 (2-23)                         |                                       | 322 (24-547)      |                       | 4 (1-7)                    |                                |
| 2008 | Viet Nam | 779 (103-1291)          |                             |                                  |                                      | 779 (103-1291)                 |                                    | 11 (2-18)                               |                                             | 779 (103-1291)           |                              | 11 (2-18)                         |                                       | 263 (20-435)      |                       | 4 (1-6)                    |                                |
| 2009 | Viet Nam | 698 (103-1163)          |                             |                                  |                                      | 698 (103-1163)                 |                                    | 10 (2-18)                               |                                             | 698 (103-1163)           |                              | 10 (2-18)                         |                                       | 232 (18-386)      |                       | 3 (1-5)                    |                                |
| 2010 | Viet Nam | 387 (71-652)            |                             |                                  |                                      | 387 (71-652)                   |                                    | 5 (1-9)                                 |                                             | 387 (71-652)             |                              | 5 (1-9)                           |                                       | 131 (24-220)      |                       | 2 (0-3)                    |                                |
| 2011 | Viet Nam | 86 (15-147)             |                             |                                  |                                      | 86 (15-147)                    |                                    | 1 (0-2)                                 |                                             | 86 (15-147)              |                              | 1 (0-2)                           |                                       | 1 (0-2)           |                       | 0 (0-1)                    |                                |
| 2012 | Viet Nam | 81 (13-137)             |                             |                                  |                                      | 81 (13-137)                    |                                    | 0 (0-1)                                 |                                             | 81 (13-137)              |                              | 0 (0-1)                           |                                       | 27 (4-45)         |                       | 0 (0-1)                    |                                |
| 2013 | Viet Nam | 140 (20-242)            |                             |                                  |                                      | 140 (20-242)                   |                                    | 2 (0-3)                                 |                                             | 140 (20-242)             |                              | 2 (0-3)                           |                                       | 50 (10-84)        |                       | 1 (0-1)                    |                                |
| 2014 | Viet Nam | 16 (3-34)               |                             |                                  |                                      | 16 (3-34)                      |                                    | 0 (0-1)                                 |                                             | 16 (3-34)                |                              | 0 (0-1)                           |                                       | 29 (4-47)         |                       | 0 (0-1)                    |                                |
| 2015 | Viet Nam | 872 (197-1429)          | 2 (2-3)                     | 11 (2-19)                        | 0 (0-1)                              | 183 (87-238)                   | 0 (0-1)                            | 2 (1-4)                                 | 0 (0-1)                                     | 102 (23-220)             | 0 (0-1)                      | 0 (0-1)                           | 0 (0-1)                               | 147 (17-241)      | 0 (0-1)               | 0 (0-1)                    | 0 (0-1)                        |
| 2001 | Yemen    | 2000 (2403-4151)        |                             |                                  |                                      | 442 (233-1003)                 |                                    | 174 (105-315)                           |                                             | 100 (20-149)             |                              | 34 (10-40)                        |                                       | 177 (81-280)      |                       | 6 (2-9)                    |                                |
| 2002 | Yemen    |                         |                             |                                  |                                      | 100 (20-149)                   |                                    | 34 (10-40)                              |                                             | 100 (20-149)             |                              | 34 (10-40)                        |                                       | 180 (81-280)      |                       | 6 (2-9)                    |                                |
| 2003 | Yemen    |                         |                             |                                  |                                      | 939 (310-1480)                 |                                    | 30 (10-47)                              |                                             | 939 (310-1480)           |                              | 30 (10-47)                        |                                       | 161 (94-255)      |                       | 5 (2-8)                    |                                |
| 2004 | Yemen    |                         |                             |                                  |                                      | 806 (298-1414)                 |                                    | 28 (8-44)                               |                                             | 806 (298-1414)           |                              | 28 (8-44)                         |                                       | 134 (81-244)      |                       | 5 (2-8)                    |                                |
| 2005 | Yemen    |                         |                             |                                  |                                      | 568 (105-909)                  |                                    | 17 (8-26)                               |                                             | 568 (105-909)            |                              | 17 (8-26)                         |                                       | 147 (90-300)      |                       | 6 (2-9)                    |                                |
| 2006 | Yemen    |                         |                             |                                  |                                      | 91 (21-138)                    |                                    | 2 (1-4)                                 |                                             | 91 (21-138)              |                              | 2 (1-4)                           |                                       | 21 (8-41)         |                       | 1 (0-1)                    |                                |
| 2007 | Yemen    |                         |                             |                                  |                                      | 84 (21-138)                    |                                    | 2 (1-4)                                 |                                             | 84 (21-138)              |                              | 2 (1-4)                           |                                       | 28 (8-46)         |                       | 1 (0-1)                    |                                |
| 2008 | Yemen    |                         |                             |                                  |                                      | 75 (21-138)                    |                                    | 2 (1-4)                                 |                                             | 75 (21-138)              |                              | 2 (1-4)                           |                                       | 28 (8-42)         |                       | 1 (0-1)                    |                                |
| 2009 | Yemen    |                         |                             |                                  |                                      | 74 (21-138)                    |                                    | 2 (1-4)                                 |                                             | 74 (21-138)              |                              | 2 (1-4)                           |                                       | 25 (7-41)         |                       | 0 (0-1)                    |                                |
| 2010 | Yemen    |                         |                             |                                  |                                      | 6 (2-10)                       |                                    | 0 (0-1)                                 |                                             | 6 (2-10)                 |                              | 0 (0-1)                           |                                       | 2 (1-3)           |                       | 0 (0-1)                    |                                |
| 2011 | Yemen    |                         |                             |                                  |                                      | 5 (2-9)                        |                                    | 0 (0-1)                                 |                                             | 5 (2-9)                  |                              | 0 (0-1)                           |                                       | 2 (1-3)           |                       | 0 (0-1)                    |                                |
| 2012 | Yemen    |                         |                             |                                  |                                      | 5 (2-9)                        |                                    | 0 (0-1)                                 |                                             | 5 (2-9)                  |                              | 0 (0-1)                           |                                       | 2 (0-3)           |                       | 0 (0-1)                    |                                |
| 2013 | Yemen    |                         |                             |                                  |                                      | 5 (2-9)                        |                                    | 0 (0-1)                                 |                                             | 5 (2-9)                  |                              | 0 (0-1)                           |                                       | 2 (0-3)           |                       | 0 (0-1)                    |                                |
| 2014 | Yemen    |                         |                             |                                  |                                      | 5 (2-9)                        |                                    | 0 (0-1)                                 |                                             | 5 (2-9)                  |                              | 0 (0-1)                           |                                       | 2 (0-3)           |                       | 0 (0-1)                    |                                |
| 2015 | Yemen    | 353 (223-577)           | 0 (0-1)                     | 9 (8-15)                         | 0 (0-1)                              | 66 (40-134)                    | 0 (0-1)                            | 2 (1-3)                                 | 0 (0-1)                                     | 62 (27-117)              | 0 (0-1)                      | 0 (0-1)                           | 0 (0-1)                               | 109 (50-196)      | 0 (0-1)               | 0 (0-1)                    | 0 (0-1)                        |
| 2001 | Zambia   | 3071 (3512-5493)        |                             |                                  |                                      | 743 (441-1535)                 |                                    | 305 (237-794)                           |                                             | 130 (746-1011)           |                              | 72 (120-329)                      |                                       | 233 (120-329)     |                       | 12 (7-17)                  |                                |
| 2002 | Zambia   |                         |                             | 210 (1928-3446)                  | 0 (0-1)                              |                                |                                    |                                         |                                             | 124 (746-1011)           |                              | 65 (104-306)                      |                                       | 124 (120-329)     |                       | 12 (7-17)                  |                                |
| 2003 | Zambia   |                         |                             |                                  |                                      |                                |                                    |                                         |                                             | 131 (205-267)            |                              | 40 (20-100)                       |                                       | 220 (20-303)      |                       | 11 (4-16)                  |                                |
| 2004 | Zambia   |                         |                             |                                  |                                      |                                |                                    |                                         |                                             | 120 (238-198)            |                              | 61 (26-80)                        |                                       | 222 (20-342)      |                       | 11 (4-17)                  |                                |
| 2005 | Zambia   |                         |                             |                                  |                                      |                                |                                    |                                         |                                             | 208 (193)                |                              | 19 (8-18)                         |                                       | 26 (1-18)         |                       | 2 (1-3)                    |                                |
| 2006 | Zambia   |                         |                             |                                  |                                      |                                |                                    |                                         |                                             | 116 (40-178)             |                              | 5 (2-8)                           |                                       | 20 (3-11)         |                       | 1 (0-1)                    |                                |
| 2007 | Zambia   |                         |                             |                                  |                                      |                                |                                    |                                         |                                             | 114 (40-178)             |                              | 5 (2-8)                           |                                       | 20 (3-10)         |                       | 1 (0-1)                    |                                |
| 2008 | Zambia   |                         |                             |                                  |                                      |                                |                                    |                                         |                                             | 132 (40-174)             |                              | 5 (2-7)                           |                                       | 19 (3-30)         |                       | 1 (0-1)                    |                                |
| 2009 | Zambia   |                         |                             |                                  |                                      |                                |                                    |                                         |                                             | 87 (40-140)              |                              | 4 (2-6)                           |                                       | 17 (2-28)         |                       | 0 (0-1)                    |                                |
| 2010 | Zambia   |                         |                             |                                  |                                      |                                |                                    |                                         |                                             | 11 (4-17)                |                              | 0 (0-1)                           |                                       | 2 (1-3)           |                       | 0 (0-1)                    |                                |
| 2011 | Zambia   |                         |                             |                                  |                                      |                                |                                    |                                         |                                             | 10 (4-16)                |                              | 0 (0-1)                           |                                       | 2 (1-3)           |                       | 0 (0-1)                    |                                |
| 2012 | Zambia   |                         |                             |                                  |                                      |                                |                                    |                                         |                                             | 10 (4-16)                |                              | 0 (0-1)                           |                                       | 1 (1-4)           |                       | 0 (0-1)                    |                                |
| 2013 | Zambia   |                         |                             |                                  |                                      |                                |                                    |                                         |                                             | 10 (4-16)                |                              | 0 (0-1)                           |                                       | 1 (1-4)           |                       | 0 (0-1)                    |                                |
| 2014 | Zambia   |                         |                             |                                  |                                      |                                |                                    |                                         |                                             | 10 (4-16)                |                              | 0 (0-1)                           |                                       | 1 (1-4)           |                       | 0 (0-1)                    |                                |
| 2015 | Zambia   | 88 (23-153)             | 17 (12-27)                  | 14 (13-21)                       | 1 (1-1)                              | 72 (41-148)                    | 2 (0-1)                            | 3 (2-5)                                 | 0 (0-1)                                     | 82 (31-153)              | 0 (0-1)                      | 0 (0-1)                           | 0 (0-1)                               | 110 (50-180)      | 0 (0-1)               | 0 (0-1)                    | 0 (0-1)                        |
| 2001 | Zimbabwe | 20675 (17777-48114)     |                             |                                  |                                      | 5601 (1552-11504)              |                                    | 310 (184-626)                           |                                             | 368 (105-926)            |                              | 28 (8-33)                         |                                       | 63 (18-102)       |                       | 2 (1-4)                    |                                |
| 2002 | Zimbabwe |                         |                             |                                  |                                      |                                |                                    |                                         |                                             | 361 (105-926)            |                              | 21 (8-26)                         |                                       | 60 (18-100)       |                       | 4 (1-6)                    |                                |
| 2003 | Zimbabwe |                         |                             |                                  |                                      |                                |                                    |                                         |                                             | 408 (105-926)            |                              | 22 (8-27)                         |                                       | 70 (20-116)       |                       | 4 (1-6)                    |                                |
| 2004 | Zimbabwe |                         |                             |                                  |                                      |                                |                                    |                                         |                                             | 440 (105-926)            |                              | 24 (7-28)                         |                                       | 80 (20-125)       |                       | 4 (1-7)                    |                                |
| 2005 | Zimbabwe |                         |                             |                                  |                                      |                                |                                    |                                         |                                             | 478 (107-926)            |                              | 26 (14-27)                        |                                       | 83 (24-127)       |                       | 4 (1-7)                    |                                |
| 2006 | Zimbabwe |                         |                             |                                  |                                      |                                |                                    |                                         |                                             | 528 (105-926)            |                              | 28 (8-40)                         |                                       | 90 (20-150)       |                       | 5 (1-8)                    |                                |
| 2007 | Zimbabwe |                         |                             |                                  |                                      |                                |                                    |                                         |                                             | 577 (105-926)            |                              | 30 (8-40)                         |                                       | 99 (20-160)       |                       | 5 (1-8)                    |                                |
| 2008 | Zimbabwe |                         |                             |                                  |                                      |                                |                                    |                                         |                                             | 626 (105-1046)           |                              | 32 (8-50)                         |                                       | 110 (20-180)      |                       | 5 (1-8)                    |                                |
| 2009 | Zimbabwe |                         |                             |                                  |                                      |                                |                                    |                                         |                                             | 109 (40-229)             |                              | 6 (2-12)                          |                                       | 27 (8-42)         |                       | 1 (0-2)                    |                                |
| 2010 | Zimbabwe |                         |                             |                                  |                                      |                                |                                    |                                         |                                             | 82 (27-154)              |                              | 4 (1-9)                           |                                       | 14 (5-24)         |                       | 1 (0-1)                    |                                |
| 2011 | Zimbabwe |                         |                             |                                  |                                      |                                |                                    |                                         |                                             | 62 (27-150)              |                              | 3 (1-4)                           |                                       | 11 (4-17)         |                       | 0 (0-1)                    |                                |
| 2012 | Zimbabwe |                         |                             |                                  |                                      |                                |                                    |                                         |                                             | 50 (20-93)               |                              | 2 (1-4)                           |                                       | 10 (4-16)         |                       | 0 (0-1)                    |                                |
| 2013 | Zimbabwe |                         |                             |                                  |                                      |                                |                                    |                                         |                                             | 5 (2-14)                 |                              | 0 (0-1)                           |                                       | 1 (1-4)           |                       | 0 (0-1)                    |                                |
| 2014 | Zimbabwe |                         |                             |                                  |                                      |                                |                                    |                                         |                                             | 5 (2-14)                 |                              | 0 (0-1)                           |                                       | 1 (1-4)           |                       | 0 (0-1)                    |                                |
| 2015 | Zimbabwe | 283 (254-483)           | 15 (13-24)                  | 12 (11-19)                       | 1 (1-1)                              | 53 (32-107)                    | 2 (0-1)                            | 2 (1-4)                                 | 0 (0-1)                                     | 5 (2-15)                 | 0 (0-1)                      | 0 (0-1)                           | 0 (0-1)                               | 31 (15-51)        | 0 (0-1)               | 0 (0-1)                    | 0 (0-1)                        |

HB = pneumococcal meningitis type 2; MV = non-pneumococcal, non-meningitis; MV = cases only in HIV-infected children. Uncertainty range provided in parentheses.

Table 11: Comparison of pneumococcal pneumonia mortality estimates from sensitivity analyses on vaccine-type pneumococcal pneumonia efficacy

|      |                     | Base Case            | Vaccine-type AOM efficacy adjustment | VT pneumococcal pneumonia efficacy adjustment (from Dutch elderly trial) |
|------|---------------------|----------------------|--------------------------------------|--------------------------------------------------------------------------|
| Year | Country             | Spn pneumonia deaths | Spn pneumonia deaths                 | Spn pneumonia deaths                                                     |
| 2000 | Alghanistan         | 8257 (5855-8605)     | 12316 (8306-12971)                   | 15851 (9643-16977)                                                       |
| 2001 | Alghanistan         | 8415 (5967-8769)     | 12551 (8464-13219)                   | 16154 (9827-17302)                                                       |
| 2002 | Alghanistan         | 8520 (6041-8879)     | 12708 (8570-13384)                   | 16356 (9950-17517)                                                       |
| 2003 | Alghanistan         | 8598 (6097-8960)     | 12825 (8649-13507)                   | 16506 (10042-17678)                                                      |
| 2004 | Alghanistan         | 8603 (6101-8966)     | 12833 (8654-13515)                   | 16516 (10048-17689)                                                      |
| 2005 | Alghanistan         | 8534 (6051-8894)     | 12729 (8584-13406)                   | 16383 (9967-17547)                                                       |
| 2006 | Alghanistan         | 8493 (6022-8851)     | 12668 (8543-13342)                   | 16304 (9919-17462)                                                       |
| 2007 | Alghanistan         | 8394 (5952-8747)     | 12520 (8443-13185)                   | 16113 (9803-17258)                                                       |
| 2008 | Alghanistan         | 8267 (5862-8616)     | 12331 (8316-12987)                   | 15871 (9655-16998)                                                       |
| 2009 | Alghanistan         | 8113 (5753-8455)     | 12102 (8161-12745)                   | 15575 (9475-16682)                                                       |
| 2010 | Alghanistan         | 7920 (5616-8254)     | 11814 (7967-12442)                   | 15205 (9250-16284)                                                       |
| 2011 | Alghanistan         | 7663 (5434-7986)     | 11429 (7708-12037)                   | 14710 (8949-15755)                                                       |
| 2012 | Alghanistan         | 7369 (5225-7679)     | 10991 (7412-11576)                   | 14146 (8606-15151)                                                       |
| 2013 | Alghanistan         | 7046 (4996-7343)     | 10510 (7088-11069)                   | 13526 (8229-14487)                                                       |
| 2014 | Alghanistan         | 5496 (3897-5728)     | 8198 (5528-8634)                     | 10551 (6419-11300)                                                       |
| 2015 | Alghanistan         | 4199 (2978-4376)     | 6263 (4224-6596)                     | 8061 (4904-8634)                                                         |
| 2000 | Albania             | 72 (51-75)           | 107 (72-113)                         | 138 (84-148)                                                             |
| 2001 | Albania             | 62 (44-65)           | 93 (62-98)                           | 119 (73-128)                                                             |
| 2002 | Albania             | 53 (38-55)           | 79 (53-83)                           | 102 (62-109)                                                             |
| 2003 | Albania             | 46 (33-48)           | 69 (46-72)                           | 88 (54-95)                                                               |
| 2004 | Albania             | 40 (28-42)           | 60 (40-63)                           | 77 (47-82)                                                               |
| 2005 | Albania             | 35 (25-36)           | 52 (35-54)                           | 66 (40-71)                                                               |
| 2006 | Albania             | 30 (21-31)           | 45 (30-47)                           | 58 (35-62)                                                               |
| 2007 | Albania             | 26 (19-28)           | 39 (27-42)                           | 51 (31-54)                                                               |
| 2008 | Albania             | 23 (16-24)           | 34 (23-36)                           | 44 (27-48)                                                               |
| 2009 | Albania             | 23 (17-24)           | 35 (23-37)                           | 45 (27-48)                                                               |
| 2010 | Albania             | 23 (16-24)           | 34 (23-36)                           | 44 (27-47)                                                               |
| 2011 | Albania             | 14 (10-15)           | 23 (16-25)                           | 33 (20-35)                                                               |
| 2012 | Albania             | 12 (8-12)            | 20 (13-21)                           | 29 (18-31)                                                               |
| 2013 | Albania             | 11 (8-11)            | 19 (13-20)                           | 28 (17-30)                                                               |
| 2014 | Albania             | 11 (8-12)            | 19 (13-20)                           | 29 (17-31)                                                               |
| 2015 | Albania             | 9 (6-9)              | 15 (10-16)                           | 24 (15-26)                                                               |
| 2000 | Algeria             | 1054 (747-1098)      | 1572 (1060-1656)                     | 2023 (1231-2167)                                                         |
| 2001 | Algeria             | 1007 (714-1049)      | 1501 (1012-1581)                     | 1932 (1176-2070)                                                         |
| 2002 | Algeria             | 964 (684-1005)       | 1438 (970-1515)                      | 1851 (1126-1983)                                                         |
| 2003 | Algeria             | 932 (661-972)        | 1391 (938-1465)                      | 1790 (1089-1917)                                                         |
| 2004 | Algeria             | 911 (646-949)        | 1358 (916-1430)                      | 1748 (1063-1872)                                                         |
| 2005 | Algeria             | 894 (634-932)        | 1334 (900-1405)                      | 1717 (1044-1839)                                                         |
| 2006 | Algeria             | 901 (639-939)        | 1343 (906-1415)                      | 1729 (1052-1852)                                                         |
| 2007 | Algeria             | 908 (644-947)        | 1355 (914-1427)                      | 1744 (1061-1868)                                                         |
| 2008 | Algeria             | 930 (659-969)        | 1387 (935-1461)                      | 1785 (1086-1912)                                                         |
| 2009 | Algeria             | 941 (667-980)        | 1403 (946-1478)                      | 1806 (1098-1934)                                                         |
| 2010 | Algeria             | 950 (674-990)        | 1417 (956-1493)                      | 1824 (1110-1954)                                                         |
| 2011 | Algeria             | 956 (678-997)        | 1427 (962-1502)                      | 1836 (1117-1966)                                                         |
| 2012 | Algeria             | 969 (687-1010)       | 1446 (975-1523)                      | 1861 (1132-1993)                                                         |
| 2013 | Algeria             | 978 (694-1019)       | 1459 (984-1537)                      | 1878 (1142-2011)                                                         |
| 2014 | Algeria             | 974 (691-1015)       | 1453 (980-1530)                      | 1870 (1138-2003)                                                         |
| 2015 | Algeria             | 972 (689-1013)       | 1449 (977-1526)                      | 1865 (1135-1998)                                                         |
| 2000 | Andorra             | 0 (0-0)              | 0 (0-0)                              | 0 (0-0)                                                                  |
| 2001 | Andorra             | 0 (0-0)              | 0 (0-0)                              | 0 (0-0)                                                                  |
| 2002 | Andorra             | 0 (0-0)              | 0 (0-0)                              | 0 (0-0)                                                                  |
| 2003 | Andorra             | 0 (0-0)              | 0 (0-0)                              | 0 (0-0)                                                                  |
| 2004 | Andorra             | 0 (0-0)              | 0 (0-0)                              | 0 (0-0)                                                                  |
| 2005 | Andorra             | 0 (0-0)              | 0 (0-0)                              | 0 (0-0)                                                                  |
| 2006 | Andorra             | 0 (0-0)              | 0 (0-0)                              | 0 (0-0)                                                                  |
| 2007 | Andorra             | 0 (0-0)              | 0 (0-0)                              | 0 (0-0)                                                                  |
| 2008 | Andorra             | 0 (0-0)              | 0 (0-0)                              | 0 (0-0)                                                                  |
| 2009 | Andorra             | 0 (0-0)              | 0 (0-0)                              | 0 (0-0)                                                                  |
| 2010 | Andorra             | 0 (0-0)              | 0 (0-0)                              | 0 (0-0)                                                                  |
| 2011 | Andorra             | 0 (0-0)              | 0 (0-0)                              | 0 (0-0)                                                                  |
| 2012 | Andorra             | 0 (0-0)              | 0 (0-0)                              | 0 (0-0)                                                                  |
| 2013 | Andorra             | 0 (0-0)              | 0 (0-0)                              | 0 (0-0)                                                                  |
| 2014 | Andorra             | 0 (0-0)              | 0 (0-0)                              | 0 (0-0)                                                                  |
| 2015 | Andorra             | 0 (0-0)              | 0 (0-0)                              | 0 (0-0)                                                                  |
| 2000 | Angola              | 9355 (6633-9749)     | 13953 (9410-14695)                   | 17958 (10925-19234)                                                      |
| 2001 | Angola              | 9584 (6796-9988)     | 14295 (9640-15055)                   | 18398 (11193-19705)                                                      |
| 2002 | Angola              | 10074 (7143-10499)   | 15026 (10133-15825)                  | 19339 (11765-20713)                                                      |
| 2003 | Angola              | 10368 (7352-10806)   | 15466 (10430-16288)                  | 19905 (12109-21319)                                                      |
| 2004 | Angola              | 10743 (7618-11196)   | 16024 (10806-16876)                  | 20624 (12547-22089)                                                      |
| 2005 | Angola              | 11195 (7938-11667)   | 16698 (11261-17586)                  | 21491 (13074-23017)                                                      |
| 2006 | Angola              | 11687 (8287-12179)   | 17432 (11756-18359)                  | 22435 (13649-24029)                                                      |
| 2007 | Angola              | 12096 (8577-12606)   | 18042 (12167-19002)                  | 23221 (14127-24871)                                                      |
| 2008 | Angola              | 12432 (8815-12956)   | 18543 (12505-19529)                  | 23866 (14519-25561)                                                      |
| 2009 | Angola              | 12606 (8939-13137)   | 18802 (12680-19802)                  | 24199 (14722-25918)                                                      |
| 2010 | Angola              | 12681 (8992-13216)   | 18915 (12756-19921)                  | 24345 (14810-26074)                                                      |
| 2011 | Angola              | 12611 (8943-13143)   | 18811 (12686-19811)                  | 24210 (14728-25930)                                                      |
| 2012 | Angola              | 12462 (8837-12988)   | 18589 (12536-19577)                  | 23924 (14554-25624)                                                      |
| 2013 | Angola              | 11867 (8415-12368)   | 17701 (11937-18642)                  | 22782 (13860-24400)                                                      |
| 2014 | Angola              | 10033 (7115-10456)   | 14966 (10093-15762)                  | 19262 (11718-20630)                                                      |
| 2015 | Angola              | 8704 (6172-9071)     | 12984 (8756-13674)                   | 16710 (10166-17897)                                                      |
| 2000 | Antigua and Barbuda | 0 (0-0)              | 0 (0-0)                              | 0 (0-0)                                                                  |
| 2001 | Antigua and Barbuda | 0 (0-0)              | 0 (0-0)                              | 0 (0-0)                                                                  |
| 2002 | Antigua and Barbuda | 0 (0-0)              | 0 (0-0)                              | 1 (0-1)                                                                  |
| 2003 | Antigua and Barbuda | 0 (0-0)              | 1 (0-1)                              | 1 (0-1)                                                                  |
| 2004 | Antigua and Barbuda | 0 (0-0)              | 1 (0-1)                              | 1 (0-1)                                                                  |
| 2005 | Antigua and Barbuda | 0 (0-0)              | 1 (0-1)                              | 1 (0-1)                                                                  |
| 2006 | Antigua and Barbuda | 0 (0-0)              | 0 (0-0)                              | 1 (0-1)                                                                  |
| 2007 | Antigua and Barbuda | 0 (0-0)              | 0 (0-0)                              | 1 (0-1)                                                                  |
| 2008 | Antigua and Barbuda | 0 (0-0)              | 0 (0-0)                              | 0 (0-1)                                                                  |
| 2009 | Antigua and Barbuda | 0 (0-0)              | 0 (0-0)                              | 1 (0-1)                                                                  |
| 2010 | Antigua and Barbuda | 0 (0-0)              | 0 (0-0)                              | 0 (0-0)                                                                  |
| 2011 | Antigua and Barbuda | 0 (0-0)              | 0 (0-0)                              | 0 (0-0)                                                                  |
| 2012 | Antigua and Barbuda | 0 (0-0)              | 0 (0-0)                              | 0 (0-0)                                                                  |
| 2013 | Antigua and Barbuda | 0 (0-0)              | 0 (0-0)                              | 0 (0-0)                                                                  |
| 2014 | Antigua and Barbuda | 0 (0-0)              | 0 (0-0)                              | 0 (0-0)                                                                  |
| 2015 | Antigua and Barbuda | 0 (0-0)              | 0 (0-0)                              | 0 (0-0)                                                                  |
| 2000 | Argentina           | 350 (248-365)        | 522 (352-550)                        | 672 (409-719)                                                            |
| 2001 | Argentina           | 363 (258-378)        | 542 (365-570)                        | 697 (424-747)                                                            |
| 2002 | Argentina           | 349 (248-364)        | 521 (351-548)                        | 670 (408-718)                                                            |
| 2003 | Argentina           | 549 (390-572)        | 819 (553-863)                        | 1055 (642-1129)                                                          |
| 2004 | Argentina           | 398 (282-414)        | 593 (400-625)                        | 763 (464-818)                                                            |
| 2005 | Argentina           | 320 (227-334)        | 478 (322-503)                        | 615 (374-659)                                                            |
| 2006 | Argentina           | 340 (241-355)        | 508 (343-535)                        | 654 (398-700)                                                            |
| 2007 | Argentina           | 398 (283-415)        | 594 (401-626)                        | 765 (465-819)                                                            |
| 2008 | Argentina           | 342 (243-356)        | 510 (344-537)                        | 657 (399-703)                                                            |
| 2009 | Argentina           | 418 (296-435)        | 623 (420-656)                        | 802 (488-859)                                                            |
| 2010 | Argentina           | 309 (219-322)        | 461 (311-485)                        | 593 (361-635)                                                            |

Spn = *Streptococcus pneumoniae*; Uncertainty range provided in parentheses.

| Year | Country    | Spn pneumonia deaths (UR) | Spn pneumonia deaths (UR) | Spn pneumonia deaths (UR) |
|------|------------|---------------------------|---------------------------|---------------------------|
| 2011 | Argentina  | 314 (223-328)             | 469 (316-494)             | 604 (367-646)             |
| 2012 | Argentina  | 238 (168-248)             | 366 (247-385)             | 484 (294-518)             |
| 2013 | Argentina  | 190 (135-198)             | 309 (208-325)             | 432 (263-462)             |
| 2014 | Argentina  | 163 (115-169)             | 271 (183-286)             | 390 (237-418)             |
| 2015 | Argentina  | 154 (109-161)             | 259 (174-272)             | 373 (227-400)             |
| 2000 | Armenia    | 52 (37-54)                | 78 (52-82)                | 100 (61-107)              |
| 2001 | Armenia    | 49 (35-51)                | 73 (49-77)                | 94 (57-100)               |
| 2002 | Armenia    | 46 (33-48)                | 69 (47-73)                | 89 (54-95)                |
| 2003 | Armenia    | 45 (32-46)                | 66 (45-70)                | 85 (52-92)                |
| 2004 | Armenia    | 43 (30-44)                | 64 (43-67)                | 82 (50-88)                |
| 2005 | Armenia    | 40 (28-42)                | 60 (40-63)                | 77 (47-82)                |
| 2006 | Armenia    | 37 (26-39)                | 56 (37-58)                | 71 (43-77)                |
| 2007 | Armenia    | 35 (25-36)                | 52 (35-55)                | 67 (41-72)                |
| 2008 | Armenia    | 32 (22-33)                | 47 (32-49)                | 60 (37-65)                |
| 2009 | Armenia    | 29 (21-30)                | 43 (29-46)                | 56 (34-60)                |
| 2010 | Armenia    | 28 (20-29)                | 41 (28-43)                | 53 (32-57)                |
| 2011 | Armenia    | 27 (19-29)                | 41 (28-43)                | 53 (32-56)                |
| 2012 | Armenia    | 25 (18-26)                | 37 (25-39)                | 48 (29-51)                |
| 2013 | Armenia    | 22 (16-23)                | 33 (23-35)                | 43 (26-46)                |
| 2014 | Armenia    | 20 (14-21)                | 30 (21-32)                | 39 (24-42)                |
| 2015 | Armenia    | 16 (12-17)                | 25 (17-26)                | 33 (20-36)                |
| 2000 | Australia  | 15 (10-15)                | 22 (15-23)                | 28 (17-30)                |
| 2001 | Australia  | 21 (15-21)                | 31 (21-32)                | 39 (24-42)                |
| 2002 | Australia  | 16 (11-16)                | 23 (16-24)                | 30 (18-32)                |
| 2003 | Australia  | 22 (16-23)                | 33 (22-35)                | 43 (26-46)                |
| 2004 | Australia  | 28 (20-29)                | 42 (28-44)                | 54 (33-57)                |
| 2005 | Australia  | 18 (12-18)                | 26 (18-28)                | 34 (20-36)                |
| 2006 | Australia  | 14 (10-14)                | 22 (15-23)                | 30 (18-32)                |
| 2007 | Australia  | 13 (9-14)                 | 22 (15-23)                | 30 (18-32)                |
| 2008 | Australia  | 10 (7-10)                 | 16 (11-17)                | 22 (13-23)                |
| 2009 | Australia  | 11 (8-11)                 | 18 (12-19)                | 26 (16-27)                |
| 2010 | Australia  | 17 (12-18)                | 26 (18-28)                | 34 (21-36)                |
| 2011 | Australia  | 9 (6-9)                   | 15 (10-15)                | 20 (12-22)                |
| 2012 | Australia  | 5 (4-5)                   | 9 (6-9)                   | 14 (9-15)                 |
| 2013 | Australia  | 5 (3-5)                   | 8 (6-9)                   | 13 (8-14)                 |
| 2014 | Australia  | 4 (3-5)                   | 8 (5-8)                   | 12 (8-13)                 |
| 2015 | Australia  | 4 (3-5)                   | 8 (5-8)                   | 12 (8-13)                 |
| 2000 | Austria    | 2 (2-2)                   | 3 (2-3)                   | 4 (2-4)                   |
| 2001 | Austria    | 4 (3-4)                   | 6 (4-6)                   | 7 (5-8)                   |
| 2002 | Austria    | 5 (3-5)                   | 7 (5-7)                   | 9 (6-10)                  |
| 2003 | Austria    | 2 (1-2)                   | 3 (2-3)                   | 3 (2-4)                   |
| 2004 | Austria    | 5 (3-5)                   | 7 (5-7)                   | 9 (6-10)                  |
| 2005 | Austria    | 1 (0-1)                   | 1 (1-1)                   | 1 (1-1)                   |
| 2006 | Austria    | 2 (1-2)                   | 3 (2-3)                   | 3 (2-4)                   |
| 2007 | Austria    | 2 (1-2)                   | 3 (2-3)                   | 4 (2-4)                   |
| 2008 | Austria    | 2 (1-2)                   | 3 (2-3)                   | 4 (2-4)                   |
| 2009 | Austria    | 2 (2-3)                   | 4 (2-4)                   | 5 (3-5)                   |
| 2010 | Austria    | 2 (1-2)                   | 3 (2-3)                   | 4 (2-4)                   |
| 2011 | Austria    | 4 (3-4)                   | 6 (4-6)                   | 8 (5-8)                   |
| 2012 | Austria    | 3 (2-3)                   | 5 (3-5)                   | 6 (4-6)                   |
| 2013 | Austria    | 1 (1-1)                   | 2 (1-2)                   | 2 (1-2)                   |
| 2014 | Austria    | 2 (1-2)                   | 3 (2-3)                   | 4 (2-4)                   |
| 2015 | Austria    | 2 (1-2)                   | 3 (2-3)                   | 4 (2-4)                   |
| 2000 | Azerbaijan | 559 (397-583)             | 835 (563-879)             | 1074 (653-1150)           |
| 2001 | Azerbaijan | 485 (344-506)             | 724 (488-762)             | 931 (567-998)             |
| 2002 | Azerbaijan | 429 (305-448)             | 641 (432-675)             | 824 (502-883)             |
| 2003 | Azerbaijan | 388 (275-405)             | 579 (391-610)             | 745 (454-798)             |
| 2004 | Azerbaijan | 361 (256-376)             | 538 (363-567)             | 692 (421-742)             |
| 2005 | Azerbaijan | 337 (239-351)             | 502 (339-529)             | 646 (393-692)             |
| 2006 | Azerbaijan | 321 (228-335)             | 479 (323-504)             | 616 (375-660)             |
| 2007 | Azerbaijan | 305 (217-318)             | 455 (307-480)             | 586 (357-628)             |
| 2008 | Azerbaijan | 295 (209-307)             | 439 (296-463)             | 565 (344-606)             |
| 2009 | Azerbaijan | 288 (204-300)             | 430 (290-452)             | 553 (336-592)             |
| 2010 | Azerbaijan | 288 (204-300)             | 430 (290-453)             | 553 (337-592)             |
| 2011 | Azerbaijan | 294 (209-307)             | 439 (296-463)             | 565 (344-605)             |
| 2012 | Azerbaijan | 303 (215-316)             | 452 (305-476)             | 582 (354-623)             |
| 2013 | Azerbaijan | 313 (222-326)             | 467 (315-491)             | 601 (365-643)             |
| 2014 | Azerbaijan | 230 (163-240)             | 343 (231-361)             | 442 (269-473)             |
| 2015 | Azerbaijan | 163 (116-170)             | 243 (164-256)             | 313 (191-336)             |
| 2000 | Bahamas    | 4 (3-4)                   | 6 (4-7)                   | 8 (5-9)                   |
| 2001 | Bahamas    | 3 (2-4)                   | 5 (4-5)                   | 7 (4-7)                   |
| 2002 | Bahamas    | 3 (2-3)                   | 4 (3-4)                   | 5 (3-6)                   |
| 2003 | Bahamas    | 2 (1-2)                   | 2 (2-2)                   | 3 (2-3)                   |
| 2004 | Bahamas    | 1 (1-1)                   | 2 (1-2)                   | 3 (2-3)                   |
| 2005 | Bahamas    | 2 (1-2)                   | 3 (2-3)                   | 3 (2-3)                   |
| 2006 | Bahamas    | 2 (1-2)                   | 3 (2-3)                   | 4 (2-4)                   |
| 2007 | Bahamas    | 3 (2-3)                   | 4 (3-5)                   | 6 (3-6)                   |
| 2008 | Bahamas    | 4 (3-4)                   | 6 (4-6)                   | 7 (4-8)                   |
| 2009 | Bahamas    | 4 (3-4)                   | 6 (4-6)                   | 8 (5-8)                   |
| 2010 | Bahamas    | 3 (2-3)                   | 5 (3-5)                   | 6 (4-7)                   |
| 2011 | Bahamas    | 3 (2-3)                   | 5 (3-5)                   | 6 (4-7)                   |
| 2012 | Bahamas    | 3 (2-3)                   | 4 (3-5)                   | 6 (4-6)                   |
| 2013 | Bahamas    | 2 (1-2)                   | 3 (2-3)                   | 5 (3-5)                   |
| 2014 | Bahamas    | 1 (1-1)                   | 2 (1-2)                   | 3 (2-3)                   |
| 2015 | Bahamas    | 1 (0-1)                   | 2 (1-2)                   | 3 (2-3)                   |
| 2000 | Bahrain    | 1 (1-1)                   | 2 (1-2)                   | 2 (1-3)                   |
| 2001 | Bahrain    | 3 (2-3)                   | 4 (3-4)                   | 5 (3-5)                   |
| 2002 | Bahrain    | 3 (2-3)                   | 4 (3-5)                   | 6 (3-6)                   |
| 2003 | Bahrain    | 3 (2-3)                   | 5 (3-5)                   | 6 (4-7)                   |
| 2004 | Bahrain    | 2 (2-3)                   | 4 (2-4)                   | 5 (3-5)                   |
| 2005 | Bahrain    | 2 (2-3)                   | 4 (3-4)                   | 5 (3-5)                   |
| 2006 | Bahrain    | 3 (2-3)                   | 4 (3-4)                   | 5 (3-5)                   |
| 2007 | Bahrain    | 3 (2-3)                   | 5 (3-5)                   | 6 (4-7)                   |
| 2008 | Bahrain    | 3 (2-3)                   | 5 (3-5)                   | 6 (4-7)                   |
| 2009 | Bahrain    | 3 (2-3)                   | 4 (3-5)                   | 6 (4-7)                   |
| 2010 | Bahrain    | 2 (1-2)                   | 3 (2-3)                   | 4 (3-5)                   |
| 2011 | Bahrain    | 1 (1-1)                   | 2 (2-2)                   | 3 (2-4)                   |
| 2012 | Bahrain    | 1 (0-1)                   | 1 (1-1)                   | 2 (1-2)                   |
| 2013 | Bahrain    | 0 (0-1)                   | 1 (1-1)                   | 1 (1-1)                   |
| 2014 | Bahrain    | 1 (0-1)                   | 1 (1-1)                   | 2 (1-2)                   |
| 2015 | Bahrain    | 1 (0-1)                   | 1 (1-1)                   | 1 (1-1)                   |
| 2000 | Bangladesh | 16671 (11822-17374)       | 24867 (16770-26189)       | 32005 (19470-34278)       |
| 2001 | Bangladesh | 15795 (11200-16461)       | 23560 (15888-24813)       | 30323 (18447-32476)       |
| 2002 | Bangladesh | 14261 (10113-14863)       | 21272 (14346-22403)       | 27378 (16656-29323)       |
| 2003 | Bangladesh | 13286 (9421-13846)        | 19818 (13365-20872)       | 25506 (15517-27318)       |
| 2004 | Bangladesh | 12289 (8714-12807)        | 18330 (12361-19305)       | 23591 (14352-25267)       |
| 2005 | Bangladesh | 11650 (8261-12141)        | 17377 (11719-18301)       | 22365 (13606-23953)       |
| 2006 | Bangladesh | 10654 (7555-11103)        | 15891 (10717-16736)       | 20452 (12442-21905)       |
| 2007 | Bangladesh | 9724 (6895-10134)         | 14504 (9782-15276)        | 18668 (11357-19994)       |

| Year | Country                          | Spn pneumonia deaths (UR) | Spn pneumonia deaths (UR) | Spn pneumonia deaths (UR) |
|------|----------------------------------|---------------------------|---------------------------|---------------------------|
| 2008 | Bangladesh                       | 8777 (6224-9147)          | 13091 (8829-13788)        | 16849 (10250-18046)       |
| 2009 | Bangladesh                       | 7935 (5627-8270)          | 11836 (7982-12466)        | 15234 (9267-16316)        |
| 2010 | Bangladesh                       | 7258 (5147-7564)          | 10826 (7301-11401)        | 13933 (8476-14923)        |
| 2011 | Bangladesh                       | 6629 (4700-6908)          | 9887 (6668-10413)         | 12726 (7742-13629)        |
| 2012 | Bangladesh                       | 6123 (4342-6381)          | 9132 (6159-9618)          | 11754 (7151-12589)        |
| 2013 | Bangladesh                       | 5655 (4010-5893)          | 8435 (5688-8883)          | 10856 (6604-11627)        |
| 2014 | Bangladesh                       | 5273 (3739-5495)          | 7865 (5304-8283)          | 10123 (6158-10842)        |
| 2015 | Bangladesh                       | 3886 (2755-4049)          | 5796 (3908-6104)          | 7459 (4538-7989)          |
| 2000 | Barbados                         | 0 (0-0)                   | 0 (0-0)                   | 0 (0-0)                   |
| 2001 | Barbados                         | 0 (0-0)                   | 1 (0-1)                   | 1 (0-1)                   |
| 2002 | Barbados                         | 1 (0-1)                   | 1 (1-1)                   | 1 (1-1)                   |
| 2003 | Barbados                         | 1 (0-1)                   | 1 (1-1)                   | 1 (1-1)                   |
| 2004 | Barbados                         | 1 (1-1)                   | 1 (1-1)                   | 2 (1-2)                   |
| 2005 | Barbados                         | 1 (1-1)                   | 2 (1-2)                   | 2 (1-2)                   |
| 2006 | Barbados                         | 2 (1-2)                   | 2 (2-3)                   | 3 (2-3)                   |
| 2007 | Barbados                         | 1 (1-1)                   | 2 (1-2)                   | 3 (2-3)                   |
| 2008 | Barbados                         | 1 (1-1)                   | 1 (1-1)                   | 2 (1-2)                   |
| 2009 | Barbados                         | 0 (0-0)                   | 0 (0-1)                   | 1 (0-1)                   |
| 2010 | Barbados                         | 0 (0-0)                   | 1 (0-1)                   | 1 (1-1)                   |
| 2011 | Barbados                         | 0 (0-0)                   | 1 (0-1)                   | 1 (1-1)                   |
| 2012 | Barbados                         | 0 (0-0)                   | 1 (1-1)                   | 1 (1-1)                   |
| 2013 | Barbados                         | 0 (0-0)                   | 0 (0-0)                   | 0 (0-0)                   |
| 2014 | Barbados                         | 0 (0-0)                   | 0 (0-0)                   | 1 (0-1)                   |
| 2015 | Barbados                         | 0 (0-0)                   | 0 (0-0)                   | 1 (0-1)                   |
| 2000 | Belarus                          | 45 (32-47)                | 67 (45-70)                | 86 (52-92)                |
| 2001 | Belarus                          | 39 (28-41)                | 59 (40-62)                | 76 (46-81)                |
| 2002 | Belarus                          | 35 (25-36)                | 52 (35-55)                | 67 (41-72)                |
| 2003 | Belarus                          | 31 (22-32)                | 46 (31-48)                | 59 (36-63)                |
| 2004 | Belarus                          | 29 (21-30)                | 43 (29-46)                | 56 (34-60)                |
| 2005 | Belarus                          | 26 (18-27)                | 39 (26-41)                | 50 (30-54)                |
| 2006 | Belarus                          | 24 (17-25)                | 36 (24-38)                | 46 (28-49)                |
| 2007 | Belarus                          | 21 (15-22)                | 31 (21-33)                | 40 (25-43)                |
| 2008 | Belarus                          | 18 (13-19)                | 28 (19-29)                | 35 (22-38)                |
| 2009 | Belarus                          | 17 (12-18)                | 26 (17-27)                | 33 (20-35)                |
| 2010 | Belarus                          | 15 (11-16)                | 22 (15-23)                | 29 (17-31)                |
| 2011 | Belarus                          | 13 (9-13)                 | 19 (13-20)                | 25 (15-27)                |
| 2012 | Belarus                          | 13 (9-13)                 | 19 (13-20)                | 25 (15-26)                |
| 2013 | Belarus                          | 12 (9-13)                 | 18 (12-19)                | 23 (14-25)                |
| 2014 | Belarus                          | 11 (8-11)                 | 16 (11-17)                | 21 (13-23)                |
| 2015 | Belarus                          | 10 (7-11)                 | 16 (11-16)                | 20 (12-21)                |
| 2000 | Belgium                          | 3 (2-3)                   | 4 (3-4)                   | 5 (3-5)                   |
| 2001 | Belgium                          | 2 (2-2)                   | 4 (2-4)                   | 5 (3-5)                   |
| 2002 | Belgium                          | 8 (5-8)                   | 12 (8-12)                 | 15 (9-16)                 |
| 2003 | Belgium                          | 4 (3-4)                   | 6 (4-7)                   | 8 (5-9)                   |
| 2004 | Belgium                          | 2 (2-3)                   | 4 (2-4)                   | 5 (3-5)                   |
| 2005 | Belgium                          | 8 (5-8)                   | 11 (8-12)                 | 15 (9-16)                 |
| 2006 | Belgium                          | 3 (2-3)                   | 4 (3-5)                   | 6 (3-6)                   |
| 2007 | Belgium                          | 7 (5-8)                   | 11 (7-12)                 | 14 (9-15)                 |
| 2008 | Belgium                          | 4 (3-4)                   | 6 (4-6)                   | 7 (4-8)                   |
| 2009 | Belgium                          | 6 (4-6)                   | 9 (6-9)                   | 12 (7-12)                 |
| 2010 | Belgium                          | 6 (4-6)                   | 9 (6-10)                  | 12 (7-13)                 |
| 2011 | Belgium                          | 4 (3-4)                   | 6 (4-7)                   | 8 (5-9)                   |
| 2012 | Belgium                          | 0 (0-0)                   | 1 (0-1)                   | 1 (1-1)                   |
| 2013 | Belgium                          | 2 (1-2)                   | 3 (2-3)                   | 4 (3-5)                   |
| 2014 | Belgium                          | 2 (1-2)                   | 3 (2-3)                   | 4 (2-4)                   |
| 2015 | Belgium                          | 1 (1-1)                   | 2 (2-3)                   | 4 (2-4)                   |
| 2000 | Belize                           | 8 (6-8)                   | 12 (8-12)                 | 15 (9-16)                 |
| 2001 | Belize                           | 7 (5-7)                   | 11 (7-11)                 | 14 (8-14)                 |
| 2002 | Belize                           | 11 (8-12)                 | 17 (11-18)                | 22 (13-23)                |
| 2003 | Belize                           | 9 (6-9)                   | 13 (9-14)                 | 17 (11-19)                |
| 2004 | Belize                           | 9 (6-9)                   | 14 (9-14)                 | 17 (11-19)                |
| 2005 | Belize                           | 5 (3-5)                   | 7 (5-8)                   | 9 (6-10)                  |
| 2006 | Belize                           | 9 (7-10)                  | 14 (9-15)                 | 18 (11-19)                |
| 2007 | Belize                           | 2 (1-2)                   | 3 (2-3)                   | 3 (2-4)                   |
| 2008 | Belize                           | 3 (2-3)                   | 4 (3-4)                   | 5 (3-5)                   |
| 2009 | Belize                           | 3 (2-3)                   | 4 (3-5)                   | 6 (3-6)                   |
| 2010 | Belize                           | 4 (3-4)                   | 6 (4-6)                   | 8 (5-8)                   |
| 2011 | Belize                           | 1 (1-1)                   | 1 (1-1)                   | 1 (1-2)                   |
| 2012 | Belize                           | 8 (6-9)                   | 12 (8-13)                 | 16 (10-17)                |
| 2013 | Belize                           | 3 (2-3)                   | 4 (3-4)                   | 5 (3-6)                   |
| 2014 | Belize                           | 4 (3-4)                   | 6 (4-6)                   | 8 (5-8)                   |
| 2015 | Belize                           | 4 (3-4)                   | 6 (4-6)                   | 8 (5-8)                   |
| 2000 | Benin                            | 2211 (1568-2304)          | 3297 (2224-3473)          | 4244 (2582-4545)          |
| 2001 | Benin                            | 2164 (1535-2256)          | 3229 (2177-3400)          | 4155 (2528-4450)          |
| 2002 | Benin                            | 2148 (1523-2239)          | 3204 (2161-3375)          | 4124 (2509-4417)          |
| 2003 | Benin                            | 2122 (1505-2211)          | 3165 (2134-3333)          | 4073 (2478-4363)          |
| 2004 | Benin                            | 2086 (1479-2174)          | 3111 (2098-3276)          | 4004 (2436-4288)          |
| 2005 | Benin                            | 2057 (1459-2144)          | 3068 (2069-3232)          | 3949 (2403-4230)          |
| 2006 | Benin                            | 2107 (1494-2196)          | 3143 (2120-3310)          | 4045 (2461-4333)          |
| 2007 | Benin                            | 2136 (1515-2226)          | 3186 (2149-3356)          | 4101 (2495-4392)          |
| 2008 | Benin                            | 2188 (1552-2280)          | 3264 (2201-3437)          | 4201 (2555-4499)          |
| 2009 | Benin                            | 2245 (1592-2340)          | 3349 (2259-3527)          | 4311 (2622-4617)          |
| 2010 | Benin                            | 2294 (1627-2390)          | 3421 (2307-3603)          | 4404 (2679-4716)          |
| 2011 | Benin                            | 2014 (1428-2099)          | 3004 (2026-3163)          | 3866 (2352-4140)          |
| 2012 | Benin                            | 1539 (1091-1604)          | 2296 (1548-2418)          | 2955 (1798-3165)          |
| 2013 | Benin                            | 1464 (1038-1525)          | 2183 (1472-2299)          | 2810 (1709-3010)          |
| 2014 | Benin                            | 1369 (971-1427)           | 2042 (1377-2151)          | 2629 (1509-2815)          |
| 2015 | Benin                            | 898 (637-936)             | 1339 (903-1410)           | 1724 (1049-1846)          |
| 2000 | Bhutan                           | 78 (55-81)                | 116 (78-122)              | 149 (91-160)              |
| 2001 | Bhutan                           | 71 (50-74)                | 106 (71-111)              | 136 (83-145)              |
| 2002 | Bhutan                           | 64 (46-67)                | 96 (58-101)               | 124 (75-133)              |
| 2003 | Bhutan                           | 58 (41-60)                | 86 (58-91)                | 111 (68-119)              |
| 2004 | Bhutan                           | 52 (37-54)                | 78 (52-82)                | 100 (61-107)              |
| 2005 | Bhutan                           | 47 (34-49)                | 70 (48-74)                | 91 (55-97)                |
| 2006 | Bhutan                           | 43 (31-45)                | 65 (44-68)                | 83 (51-89)                |
| 2007 | Bhutan                           | 40 (28-42)                | 60 (40-63)                | 77 (47-82)                |
| 2008 | Bhutan                           | 37 (26-38)                | 55 (37-58)                | 71 (43-76)                |
| 2009 | Bhutan                           | 34 (24-35)                | 50 (34-53)                | 65 (39-69)                |
| 2010 | Bhutan                           | 31 (22-32)                | 46 (31-48)                | 59 (36-63)                |
| 2011 | Bhutan                           | 28 (20-29)                | 42 (28-44)                | 53 (32-57)                |
| 2012 | Bhutan                           | 25 (18-26)                | 37 (25-39)                | 48 (29-51)                |
| 2013 | Bhutan                           | 22 (16-23)                | 33 (22-35)                | 43 (26-46)                |
| 2014 | Bhutan                           | 20 (14-21)                | 30 (20-32)                | 39 (24-42)                |
| 2015 | Bhutan                           | 19 (13-20)                | 28 (19-30)                | 36 (22-39)                |
| 2000 | Bolivia (Plurinational State of) | 1187 (841-1237)           | 1770 (1194-1864)          | 2278 (1386-2440)          |
| 2001 | Bolivia (Plurinational State of) | 1116 (791-1163)           | 1665 (1123-1753)          | 2143 (1304-2295)          |
| 2002 | Bolivia (Plurinational State of) | 1036 (734-1079)           | 1545 (1042-1627)          | 1988 (1210-2129)          |
| 2003 | Bolivia (Plurinational State of) | 955 (677-995)             | 1424 (960-1500)           | 1833 (1115-1963)          |
| 2004 | Bolivia (Plurinational State of) | 872 (618-908)             | 1300 (877-1369)           | 1673 (1018-1792)          |

| Year | Country                          | Spn pneumonia deaths (UR) | Spn pneumonia deaths (UR) | Spn pneumonia deaths (UR) |
|------|----------------------------------|---------------------------|---------------------------|---------------------------|
| 2005 | Bolivia (Plurinational State of) | 801 (568-835)             | 1195 (806-1259)           | 1539 (936-1648)           |
| 2006 | Bolivia (Plurinational State of) | 741 (525-772)             | 1105 (745-1164)           | 1422 (865-1523)           |
| 2007 | Bolivia (Plurinational State of) | 688 (488-717)             | 1027 (692-1081)           | 1321 (804-1415)           |
| 2008 | Bolivia (Plurinational State of) | 650 (461-677)             | 969 (654-1021)            | 1247 (759-1336)           |
| 2009 | Bolivia (Plurinational State of) | 613 (434-638)             | 914 (616-962)             | 1176 (715-1259)           |
| 2010 | Bolivia (Plurinational State of) | 577 (410-602)             | 861 (581-907)             | 1109 (674-1187)           |
| 2011 | Bolivia (Plurinational State of) | 542 (384-565)             | 809 (545-852)             | 1041 (633-1115)           |
| 2012 | Bolivia (Plurinational State of) | 513 (364-534)             | 765 (516-806)             | 984 (599-1054)            |
| 2013 | Bolivia (Plurinational State of) | 481 (341-501)             | 717 (484-755)             | 923 (562-989)             |
| 2014 | Bolivia (Plurinational State of) | 351 (249-366)             | 524 (353-552)             | 675 (410-723)             |
| 2015 | Bolivia (Plurinational State of) | 245 (174-255)             | 365 (246-385)             | 470 (286-504)             |
| 2000 | Bosnia and Herzegovina           | 6 (4-6)                   | 9 (6-9)                   | 11 (7-12)                 |
| 2001 | Bosnia and Herzegovina           | 5 (4-5)                   | 8 (5-8)                   | 10 (6-11)                 |
| 2002 | Bosnia and Herzegovina           | 5 (3-5)                   | 7 (5-7)                   | 9 (6-10)                  |
| 2003 | Bosnia and Herzegovina           | 4 (3-5)                   | 7 (4-7)                   | 8 (5-9)                   |
| 2004 | Bosnia and Herzegovina           | 4 (3-4)                   | 6 (4-7)                   | 8 (5-9)                   |
| 2005 | Bosnia and Herzegovina           | 5 (3-5)                   | 7 (5-7)                   | 9 (5-9)                   |
| 2006 | Bosnia and Herzegovina           | 4 (3-4)                   | 6 (4-7)                   | 8 (5-9)                   |
| 2007 | Bosnia and Herzegovina           | 5 (3-5)                   | 7 (5-7)                   | 9 (5-9)                   |
| 2008 | Bosnia and Herzegovina           | 5 (3-5)                   | 7 (5-8)                   | 9 (6-10)                  |
| 2009 | Bosnia and Herzegovina           | 5 (3-5)                   | 7 (5-7)                   | 9 (5-9)                   |
| 2010 | Bosnia and Herzegovina           | 4 (3-4)                   | 6 (4-6)                   | 8 (5-8)                   |
| 2011 | Bosnia and Herzegovina           | 3 (2-3)                   | 5 (3-5)                   | 6 (4-7)                   |
| 2012 | Bosnia and Herzegovina           | 3 (2-3)                   | 4 (3-5)                   | 6 (3-6)                   |
| 2013 | Bosnia and Herzegovina           | 2 (2-2)                   | 4 (2-4)                   | 5 (3-5)                   |
| 2014 | Bosnia and Herzegovina           | 2 (1-2)                   | 3 (2-3)                   | 4 (2-4)                   |
| 2015 | Bosnia and Herzegovina           | 2 (1-2)                   | 2 (2-3)                   | 3 (2-3)                   |
| 2000 | Botswana                         | 86 (61-89)                | 128 (86-135)              | 164 (100-176)             |
| 2001 | Botswana                         | 88 (62-92)                | 131 (89-138)              | 169 (103-181)             |
| 2002 | Botswana                         | 91 (64-95)                | 136 (91-143)              | 175 (106-187)             |
| 2003 | Botswana                         | 94 (67-98)                | 140 (95-148)              | 181 (110-194)             |
| 2004 | Botswana                         | 99 (70-103)               | 147 (99-155)              | 190 (115-203)             |
| 2005 | Botswana                         | 103 (73-108)              | 154 (104-162)             | 198 (121-212)             |
| 2006 | Botswana                         | 106 (76-111)              | 159 (107-167)             | 204 (124-219)             |
| 2007 | Botswana                         | 110 (78-115)              | 165 (111-174)             | 212 (129-227)             |
| 2008 | Botswana                         | 114 (81-118)              | 169 (114-178)             | 218 (133-233)             |
| 2009 | Botswana                         | 115 (82-120)              | 171 (116-181)             | 221 (134-236)             |
| 2010 | Botswana                         | 115 (82-120)              | 172 (116-181)             | 221 (134-237)             |
| 2011 | Botswana                         | 117 (83-122)              | 174 (118-184)             | 224 (136-240)             |
| 2012 | Botswana                         | 95 (68-99)                | 142 (96-150)              | 183 (111-196)             |
| 2013 | Botswana                         | 82 (58-85)                | 122 (82-128)              | 157 (95-168)              |
| 2014 | Botswana                         | 68 (48-71)                | 102 (69-107)              | 131 (80-140)              |
| 2015 | Botswana                         | 61 (44-64)                | 92 (62-97)                | 118 (72-126)              |
| 2000 | Brazil                           | 5337 (3784-5562)          | 7960 (5368-8383)          | 10245 (6233-10972)        |
| 2001 | Brazil                           | 4715 (3344-4914)          | 7033 (4743-7407)          | 9052 (5507-9695)          |
| 2002 | Brazil                           | 4095 (2904-4268)          | 6108 (4119-6433)          | 7862 (4783-8420)          |
| 2003 | Brazil                           | 3735 (2648-3892)          | 5571 (3757-5867)          | 7170 (4362-7679)          |
| 2004 | Brazil                           | 3412 (2419-3555)          | 5089 (3432-5359)          | 6549 (3984-7014)          |
| 2005 | Brazil                           | 2877 (2040-2999)          | 4292 (2894-4520)          | 5524 (3361-5916)          |
| 2006 | Brazil                           | 2612 (1852-2722)          | 3896 (2627-4103)          | 5014 (3050-5370)          |
| 2007 | Brazil                           | 2193 (1555-2286)          | 3271 (2206-3445)          | 4210 (2561-4509)          |
| 2008 | Brazil                           | 1791 (1270-1866)          | 2671 (1801-2813)          | 3437 (2091-3682)          |
| 2009 | Brazil                           | 1587 (1125-1654)          | 2367 (1596-2493)          | 3046 (1853-3263)          |
| 2010 | Brazil                           | 1146 (813-1195)           | 1739 (1172-1831)          | 2271 (1381-2432)          |
| 2011 | Brazil                           | 900 (638-938)             | 1441 (972-1518)           | 1981 (1205-2122)          |
| 2012 | Brazil                           | 752 (533-784)             | 1239 (835-1305)           | 1754 (1067-1878)          |
| 2013 | Brazil                           | 753 (534-784)             | 1263 (852-1330)           | 1825 (1110-1955)          |
| 2014 | Brazil                           | 678 (481-706)             | 1184 (799-1247)           | 1792 (1090-1919)          |
| 2015 | Brazil                           | 701 (497-730)             | 1241 (837-1307)           | 1907 (1160-2043)          |
| 2000 | Brunei Darussalam                | 1 (1-1)                   | 2 (1-2)                   | 2 (1-2)                   |
| 2001 | Brunei Darussalam                | 1 (1-1)                   | 2 (1-2)                   | 2 (1-2)                   |
| 2002 | Brunei Darussalam                | 1 (1-1)                   | 2 (1-2)                   | 2 (1-2)                   |
| 2003 | Brunei Darussalam                | 1 (1-1)                   | 2 (1-2)                   | 2 (1-2)                   |
| 2004 | Brunei Darussalam                | 1 (1-1)                   | 2 (1-2)                   | 2 (1-2)                   |
| 2005 | Brunei Darussalam                | 1 (1-1)                   | 2 (1-2)                   | 2 (1-2)                   |
| 2006 | Brunei Darussalam                | 1 (1-1)                   | 2 (1-2)                   | 2 (1-2)                   |
| 2007 | Brunei Darussalam                | 1 (1-1)                   | 2 (1-2)                   | 2 (1-2)                   |
| 2008 | Brunei Darussalam                | 1 (1-1)                   | 2 (1-2)                   | 2 (1-2)                   |
| 2009 | Brunei Darussalam                | 1 (1-1)                   | 1 (1-2)                   | 2 (1-2)                   |
| 2010 | Brunei Darussalam                | 1 (1-1)                   | 2 (1-2)                   | 2 (1-2)                   |
| 2011 | Brunei Darussalam                | 1 (1-1)                   | 1 (1-2)                   | 2 (1-2)                   |
| 2012 | Brunei Darussalam                | 1 (1-1)                   | 2 (1-2)                   | 2 (1-2)                   |
| 2013 | Brunei Darussalam                | 1 (1-1)                   | 1 (1-1)                   | 2 (1-2)                   |
| 2014 | Brunei Darussalam                | 1 (1-1)                   | 1 (1-1)                   | 2 (1-2)                   |
| 2015 | Brunei Darussalam                | 1 (1-1)                   | 1 (1-1)                   | 1 (1-2)                   |
| 2000 | Bulgaria                         | 84 (60-88)                | 125 (85-132)              | 161 (98-173)              |
| 2001 | Bulgaria                         | 78 (56-82)                | 117 (79-123)              | 150 (91-161)              |
| 2002 | Bulgaria                         | 63 (45-65)                | 94 (63-99)                | 121 (73-129)              |
| 2003 | Bulgaria                         | 73 (52-77)                | 110 (74-115)              | 141 (86-151)              |
| 2004 | Bulgaria                         | 52 (37-54)                | 77 (52-81)                | 99 (60-106)               |
| 2005 | Bulgaria                         | 58 (41-61)                | 87 (58-91)                | 112 (68-119)              |
| 2006 | Bulgaria                         | 56 (40-58)                | 83 (56-88)                | 107 (65-115)              |
| 2007 | Bulgaria                         | 51 (36-53)                | 76 (51-80)                | 98 (59-105)               |
| 2008 | Bulgaria                         | 45 (32-47)                | 67 (45-71)                | 87 (53-93)                |
| 2009 | Bulgaria                         | 67 (47-69)                | 99 (67-105)               | 128 (78-137)              |
| 2010 | Bulgaria                         | 48 (34-50)                | 76 (52-81)                | 104 (63-112)              |
| 2011 | Bulgaria                         | 29 (21-31)                | 49 (33-52)                | 71 (43-76)                |
| 2012 | Bulgaria                         | 25 (17-26)                | 42 (28-44)                | 62 (38-66)                |
| 2013 | Bulgaria                         | 23 (16-24)                | 39 (26-41)                | 58 (35-62)                |
| 2014 | Bulgaria                         | 15 (11-16)                | 27 (18-28)                | 41 (25-44)                |
| 2015 | Bulgaria                         | 13 (9-13)                 | 23 (15-24)                | 36 (22-39)                |
| 2000 | Burkina Faso                     | 2822 (2001-2941)          | 4210 (2839-4434)          | 5418 (3296-5803)          |
| 2001 | Burkina Faso                     | 2991 (2121-3117)          | 4461 (3008-4698)          | 5741 (3493-6149)          |
| 2002 | Burkina Faso                     | 3173 (2250-3307)          | 4733 (3192-4985)          | 6092 (3706-6525)          |
| 2003 | Burkina Faso                     | 3363 (2385-3505)          | 5017 (3383-5283)          | 6457 (3928-6915)          |
| 2004 | Burkina Faso                     | 3525 (2499-3673)          | 5257 (3545-5537)          | 6766 (4116-7247)          |
| 2005 | Burkina Faso                     | 3569 (2531-3719)          | 5323 (3590-5606)          | 6851 (4168-7338)          |
| 2006 | Burkina Faso                     | 3454 (2449-3600)          | 5152 (3474-5426)          | 6631 (4034-7102)          |
| 2007 | Burkina Faso                     | 3186 (2259-3320)          | 4752 (3204-5004)          | 6115 (3720-6550)          |
| 2008 | Burkina Faso                     | 2878 (2041-2999)          | 4293 (2895-4521)          | 5525 (3361-5917)          |
| 2009 | Burkina Faso                     | 2719 (1928-2834)          | 4056 (2735-4271)          | 5220 (3175-5590)          |
| 2010 | Burkina Faso                     | 2707 (1919-2821)          | 4037 (2722-4252)          | 5196 (3161-5565)          |
| 2011 | Burkina Faso                     | 2877 (2040-2998)          | 4291 (2894-4519)          | 5523 (3360-5915)          |
| 2012 | Burkina Faso                     | 3054 (2165-3182)          | 4555 (3072-4797)          | 5862 (3566-6278)          |
| 2013 | Burkina Faso                     | 3253 (2307-3390)          | 4852 (3272-5110)          | 6244 (3799-6688)          |
| 2014 | Burkina Faso                     | 2241 (1589-2335)          | 3342 (2254-3520)          | 4302 (2617-4607)          |
| 2015 | Burkina Faso                     | 1882 (1335-1961)          | 2807 (1893-2956)          | 3613 (2198-3870)          |
| 2000 | Burundi                          | 2274 (1613-2370)          | 3392 (2287-3572)          | 4366 (2656-4676)          |
| 2001 | Burundi                          | 2264 (1605-2359)          | 3376 (2277-3556)          | 4345 (2644-4654)          |

| Year | Country                  | Spn pneumonia deaths (UR) | Spn pneumonia deaths (UR) | Spn pneumonia deaths (UR) |
|------|--------------------------|---------------------------|---------------------------|---------------------------|
| 2002 | Burundi                  | 2224 (1577-2318)          | 3317 (2237-3494)          | 4269 (2597-4573)          |
| 2003 | Burundi                  | 2358 (1672-2457)          | 3517 (2372-3704)          | 4527 (2754-4848)          |
| 2004 | Burundi                  | 2445 (1734-2548)          | 3647 (2460-3841)          | 4694 (2856-5028)          |
| 2005 | Burundi                  | 2433 (1725-2535)          | 3629 (2447-3822)          | 4670 (2841-5002)          |
| 2006 | Burundi                  | 2565 (1819-2673)          | 3826 (2580-4029)          | 4924 (2996-5274)          |
| 2007 | Burundi                  | 2578 (1828-2686)          | 3845 (2593-4049)          | 4948 (3010-5300)          |
| 2008 | Burundi                  | 2574 (1826-2683)          | 3840 (2590-4044)          | 4942 (3007-5293)          |
| 2009 | Burundi                  | 2582 (1831-2691)          | 3851 (2597-4056)          | 4956 (3015-5309)          |
| 2010 | Burundi                  | 2574 (1826-2683)          | 3840 (2590-4044)          | 4942 (3007-5293)          |
| 2011 | Burundi                  | 2459 (1744-2563)          | 3668 (2474-3863)          | 4721 (2872-5057)          |
| 2012 | Burundi                  | 1623 (1151-1691)          | 2421 (1632-2549)          | 3115 (1895-3337)          |
| 2013 | Burundi                  | 1338 (949-1394)           | 1996 (1346-2102)          | 2568 (1562-2751)          |
| 2014 | Burundi                  | 1199 (850-1249)           | 1788 (1206-1883)          | 2301 (1400-2465)          |
| 2015 | Burundi                  | 879 (623-916)             | 1311 (884-1380)           | 1687 (1026-1807)          |
| 2000 | Cambodia                 | 2341 (1660-2440)          | 3492 (2355-3678)          | 4494 (2734-4814)          |
| 2001 | Cambodia                 | 2053 (1456-2139)          | 3062 (2065-3225)          | 3941 (2397-4221)          |
| 2002 | Cambodia                 | 1783 (1264-1858)          | 2660 (1794-2801)          | 3423 (2083-3666)          |
| 2003 | Cambodia                 | 1557 (1104-1622)          | 2322 (1566-2445)          | 2988 (1818-3200)          |
| 2004 | Cambodia                 | 1400 (993-1459)           | 2088 (1408-2199)          | 2687 (1635-2878)          |
| 2005 | Cambodia                 | 1286 (912-1340)           | 1918 (1293-2020)          | 2468 (1502-2644)          |
| 2006 | Cambodia                 | 1199 (851-1250)           | 1789 (1207-1884)          | 2303 (1401-2466)          |
| 2007 | Cambodia                 | 1117 (792-1164)           | 1665 (1123-1754)          | 2143 (1304-2296)          |
| 2008 | Cambodia                 | 1037 (735-1080)           | 1546 (1043-1628)          | 1990 (1211-2131)          |
| 2009 | Cambodia                 | 946 (671-986)             | 1411 (952-1486)           | 1816 (1105-1945)          |
| 2010 | Cambodia                 | 841 (596-876)             | 1254 (846-1321)           | 1614 (982-1728)           |
| 2011 | Cambodia                 | 752 (533-784)             | 1122 (757-1182)           | 1444 (878-1546)           |
| 2012 | Cambodia                 | 657 (466-688)             | 980 (661-1032)            | 1261 (767-1351)           |
| 2013 | Cambodia                 | 594 (422-620)             | 887 (598-934)             | 1141 (694-1222)           |
| 2014 | Cambodia                 | 548 (388-571)             | 817 (551-860)             | 1052 (640-1126)           |
| 2015 | Cambodia                 | 349 (247-364)             | 520 (351-548)             | 670 (407-717)             |
| 2000 | Cameroon                 | 4934 (3499-5142)          | 7360 (4963-7751)          | 9472 (5762-10145)         |
| 2001 | Cameroon                 | 4771 (3383-4973)          | 7117 (4800-7495)          | 9160 (5572-9810)          |
| 2002 | Cameroon                 | 4738 (3360-4938)          | 7067 (4766-7443)          | 9096 (5534-9742)          |
| 2003 | Cameroon                 | 4600 (3262-4794)          | 6862 (4628-7277)          | 8852 (5373-9459)          |
| 2004 | Cameroon                 | 4488 (3182-4677)          | 6694 (4514-7050)          | 8615 (5241-9227)          |
| 2005 | Cameroon                 | 4464 (3165-4652)          | 6658 (4490-7012)          | 8569 (5213-9178)          |
| 2006 | Cameroon                 | 4553 (3228-4745)          | 6791 (4580-7152)          | 8740 (5317-9361)          |
| 2007 | Cameroon                 | 4603 (3264-4797)          | 6866 (4630-7231)          | 8837 (5376-9465)          |
| 2008 | Cameroon                 | 4770 (3383-4971)          | 7115 (4799-7494)          | 9158 (5571-9808)          |
| 2009 | Cameroon                 | 5010 (3553-5221)          | 7473 (5040-7870)          | 9618 (5851-10301)         |
| 2010 | Cameroon                 | 5066 (3593-5280)          | 7557 (5096-7959)          | 9726 (5917-10417)         |
| 2011 | Cameroon                 | 4654 (3300-4850)          | 6941 (4681-7310)          | 8934 (5435-9568)          |
| 2012 | Cameroon                 | 3341 (2369-3482)          | 4983 (3360-5248)          | 6413 (3902-6869)          |
| 2013 | Cameroon                 | 2771 (1965-2888)          | 4133 (2787-4353)          | 5319 (3236-5697)          |
| 2014 | Cameroon                 | 2492 (1767-2597)          | 3716 (2506-3914)          | 4783 (2910-5123)          |
| 2015 | Cameroon                 | 1739 (1233-1812)          | 2594 (1749-2732)          | 3338 (2031-3575)          |
| 2000 | Canada                   | 18 (13-18)                | 26 (18-28)                | 34 (21-36)                |
| 2001 | Canada                   | 18 (12-18)                | 26 (18-28)                | 34 (21-36)                |
| 2002 | Canada                   | 14 (10-14)                | 21 (14-22)                | 27 (16-29)                |
| 2003 | Canada                   | 15 (10-15)                | 22 (15-23)                | 29 (17-31)                |
| 2004 | Canada                   | 12 (8-12)                 | 17 (12-18)                | 23 (14-24)                |
| 2005 | Canada                   | 12 (8-12)                 | 18 (12-19)                | 23 (14-25)                |
| 2006 | Canada                   | 14 (10-14)                | 21 (14-22)                | 28 (17-30)                |
| 2007 | Canada                   | 18 (13-19)                | 27 (18-29)                | 36 (22-39)                |
| 2008 | Canada                   | 9 (6-9)                   | 14 (9-14)                 | 18 (11-19)                |
| 2009 | Canada                   | 14 (10-15)                | 23 (15-24)                | 31 (19-33)                |
| 2010 | Canada                   | 10 (7-11)                 | 16 (11-17)                | 23 (14-24)                |
| 2011 | Canada                   | 6 (4-6)                   | 10 (7-11)                 | 15 (9-16)                 |
| 2012 | Canada                   | 5 (3-5)                   | 8 (6-9)                   | 13 (8-14)                 |
| 2013 | Canada                   | 4 (3-4)                   | 7 (5-7)                   | 11 (7-12)                 |
| 2014 | Canada                   | 3 (2-3)                   | 6 (4-6)                   | 9 (6-10)                  |
| 2015 | Canada                   | 3 (2-3)                   | 6 (4-6)                   | 9 (6-10)                  |
| 2000 | Cape Verde               | 22 (16-23)                | 33 (22-35)                | 43 (26-46)                |
| 2001 | Cape Verde               | 19 (14-20)                | 29 (19-30)                | 37 (22-39)                |
| 2002 | Cape Verde               | 17 (12-18)                | 25 (17-26)                | 32 (20-35)                |
| 2003 | Cape Verde               | 15 (11-16)                | 23 (15-24)                | 29 (18-31)                |
| 2004 | Cape Verde               | 14 (10-15)                | 21 (14-23)                | 28 (17-30)                |
| 2005 | Cape Verde               | 14 (10-15)                | 21 (14-22)                | 27 (16-29)                |
| 2006 | Cape Verde               | 14 (10-15)                | 21 (14-22)                | 27 (17-29)                |
| 2007 | Cape Verde               | 14 (10-15)                | 21 (14-23)                | 28 (17-30)                |
| 2008 | Cape Verde               | 14 (10-15)                | 21 (14-23)                | 28 (17-29)                |
| 2009 | Cape Verde               | 14 (10-15)                | 21 (14-22)                | 27 (16-29)                |
| 2010 | Cape Verde               | 14 (10-14)                | 20 (14-22)                | 26 (16-28)                |
| 2011 | Cape Verde               | 15 (10-15)                | 22 (15-23)                | 28 (17-30)                |
| 2012 | Cape Verde               | 14 (10-15)                | 21 (14-22)                | 27 (17-29)                |
| 2013 | Cape Verde               | 14 (10-14)                | 21 (14-22)                | 27 (16-29)                |
| 2014 | Cape Verde               | 13 (9-14)                 | 20 (13-21)                | 25 (15-27)                |
| 2015 | Cape Verde               | 13 (9-13)                 | 19 (13-20)                | 24 (15-26)                |
| 2000 | Central African Republic | 891 (632-929)             | 1330 (897-1400)           | 1711 (1041-1833)          |
| 2001 | Central African Republic | 899 (638-937)             | 1342 (905-1413)           | 1727 (1050-1849)          |
| 2002 | Central African Republic | 911 (646-950)             | 1360 (917-1432)           | 1750 (1064-1874)          |
| 2003 | Central African Republic | 891 (632-929)             | 1330 (897-1400)           | 1711 (1041-1833)          |
| 2004 | Central African Republic | 868 (616-905)             | 1295 (873-1364)           | 1666 (1014-1785)          |
| 2005 | Central African Republic | 843 (598-879)             | 1258 (848-1324)           | 1619 (985-1734)           |
| 2006 | Central African Republic | 879 (623-916)             | 1311 (884-1381)           | 1688 (1027-1807)          |
| 2007 | Central African Republic | 919 (652-958)             | 1370 (924-1443)           | 1764 (1073-1889)          |
| 2008 | Central African Republic | 950 (674-990)             | 1418 (956-1493)           | 1825 (1110-1954)          |
| 2009 | Central African Republic | 1029 (730-1073)           | 1535 (1025-1616)          | 1975 (1202-2116)          |
| 2010 | Central African Republic | 1081 (767-1127)           | 1613 (1088-1699)          | 2076 (1263-2223)          |
| 2011 | Central African Republic | 1091 (773-1137)           | 1627 (1097-1713)          | 2094 (1274-2242)          |
| 2012 | Central African Republic | 916 (650-955)             | 1367 (922-1439)           | 1759 (1070-1884)          |
| 2013 | Central African Republic | 995 (708-1037)            | 1485 (1001-1564)          | 1911 (1162-2046)          |
| 2014 | Central African Republic | 893 (633-930)             | 1332 (896-1402)           | 1714 (1043-1836)          |
| 2015 | Central African Republic | 856 (607-892)             | 1276 (861-1344)           | 1643 (999-1750)           |
| 2000 | Chad                     | 4851 (3440-5055)          | 7235 (4879-7620)          | 9312 (5665-9974)          |
| 2001 | Chad                     | 4956 (3515-5165)          | 7393 (4986-7786)          | 9515 (5789-10191)         |
| 2002 | Chad                     | 5366 (3805-5592)          | 8004 (5398-8429)          | 10301 (6267-11033)        |
| 2003 | Chad                     | 5402 (3831-5630)          | 8058 (5434-8486)          | 10371 (6309-11107)        |
| 2004 | Chad                     | 5598 (3970-5834)          | 8350 (5631-8795)          | 10747 (6538-11511)        |
| 2005 | Chad                     | 5788 (4104-6032)          | 8634 (5822-9093)          | 11112 (6760-11901)        |
| 2006 | Chad                     | 6167 (4373-6427)          | 9199 (6204-9688)          | 11840 (7203-12681)        |
| 2007 | Chad                     | 6115 (4336-6373)          | 9121 (6151-9606)          | 11739 (7142-12573)        |
| 2008 | Chad                     | 6402 (4539-6671)          | 9549 (6439-10056)         | 12289 (7476-13162)        |
| 2009 | Chad                     | 6268 (4444-6532)          | 9349 (6305-9846)          | 12033 (7320-12887)        |
| 2010 | Chad                     | 6331 (4490-6598)          | 9444 (6369-9946)          | 12155 (7394-13018)        |
| 2011 | Chad                     | 6376 (4521-6644)          | 9510 (6413-10016)         | 12240 (7446-13109)        |
| 2012 | Chad                     | 6389 (4530-6658)          | 9530 (6427-10037)         | 12265 (7462-13136)        |
| 2013 | Chad                     | 6426 (4557-6697)          | 9585 (6464-10094)         | 12336 (7505-13212)        |
| 2014 | Chad                     | 6391 (4532-6661)          | 9533 (6429-10040)         | 12270 (7464-13141)        |

| Year | Country      | Spn pneumonia deaths (UR) | Spn pneumonia deaths (UR) | Spn pneumonia deaths (UR) |
|------|--------------|---------------------------|---------------------------|---------------------------|
| 2015 | Chad         | 6347 (4500-6614)          | 9467 (6384-9970)          | 12184 (7412-13049)        |
| 2000 | Chile        | 102 (72-106)              | 152 (103-160)             | 196 (119-210)             |
| 2001 | Chile        | 113 (80-118)              | 169 (114-178)             | 217 (132-233)             |
| 2002 | Chile        | 55 (39-57)                | 81 (55-86)                | 105 (64-112)              |
| 2003 | Chile        | 54 (38-56)                | 81 (54-85)                | 104 (63-111)              |
| 2004 | Chile        | 52 (37-54)                | 78 (52-82)                | 100 (61-107)              |
| 2005 | Chile        | 45 (32-47)                | 67 (46-71)                | 87 (53-93)                |
| 2006 | Chile        | 34 (24-35)                | 50 (34-53)                | 64 (39-69)                |
| 2007 | Chile        | 41 (29-42)                | 61 (41-64)                | 78 (47-84)                |
| 2008 | Chile        | 46 (32-47)                | 68 (46-72)                | 87 (53-94)                |
| 2009 | Chile        | 44 (31-46)                | 65 (44-69)                | 84 (51-90)                |
| 2010 | Chile        | 33 (24-35)                | 50 (33-52)                | 64 (39-68)                |
| 2011 | Chile        | 18 (13-18)                | 27 (19-29)                | 37 (22-39)                |
| 2012 | Chile        | 15 (10-15)                | 24 (16-25)                | 33 (20-36)                |
| 2013 | Chile        | 16 (11-17)                | 26 (18-28)                | 37 (23-40)                |
| 2014 | Chile        | 12 (9-13)                 | 21 (14-22)                | 30 (18-32)                |
| 2015 | Chile        | 9 (7-10)                  | 16 (11-17)                | 25 (15-27)                |
| 2000 | China        | 22713 (16106-23670)       | 33878 (22847-35679)       | 43602 (26526-46699)       |
| 2001 | China        | 19466 (13803-20286)       | 29035 (19580-30578)       | 37369 (22733-40023)       |
| 2002 | China        | 16759 (11884-17465)       | 24997 (16858-26327)       | 32173 (19572-34458)       |
| 2003 | China        | 14281 (10126-14883)       | 21301 (14365-22434)       | 27415 (16678-29363)       |
| 2004 | China        | 12283 (8710-12801)        | 18321 (12355-19295)       | 23580 (14345-25255)       |
| 2005 | China        | 10736 (7613-11189)        | 16014 (10799-16865)       | 20610 (12538-22074)       |
| 2006 | China        | 9824 (6966-10238)         | 14653 (9882-15433)        | 18859 (11473-20199)       |
| 2007 | China        | 9131 (6475-9516)          | 13620 (9185-14344)        | 17529 (10664-18774)       |
| 2008 | China        | 8604 (6101-8966)          | 12833 (8655-13516)        | 16517 (10048-17690)       |
| 2009 | China        | 8067 (5720-8407)          | 12033 (8115-12673)        | 15487 (9422-16587)        |
| 2010 | China        | 7614 (5399-7934)          | 11356 (7658-11960)        | 14616 (8892-15654)        |
| 2011 | China        | 7019 (4977-7315)          | 10469 (7060-11026)        | 13474 (8197-14431)        |
| 2012 | China        | 6490 (4602-6763)          | 9680 (6528-10194)         | 12458 (7579-13343)        |
| 2013 | China        | 6012 (4263-6265)          | 8967 (6047-9443)          | 11540 (7021-12360)        |
| 2014 | China        | 5545 (3932-5779)          | 8272 (5578-8711)          | 10646 (6476-11402)        |
| 2015 | China        | 5257 (3728-5479)          | 7842 (5288-8259)          | 10093 (6140-10810)        |
| 2000 | Colombia     | 906 (643-945)             | 1352 (912-1424)           | 1740 (1058-1863)          |
| 2001 | Colombia     | 785 (556-818)             | 1170 (789-1233)           | 1506 (916-1613)           |
| 2002 | Colombia     | 623 (442-649)             | 929 (627-979)             | 1196 (727-1281)           |
| 2003 | Colombia     | 691 (490-720)             | 1030 (695-1085)           | 1326 (807-1420)           |
| 2004 | Colombia     | 700 (496-729)             | 1044 (704-1099)           | 1343 (817-1439)           |
| 2005 | Colombia     | 681 (483-709)             | 1015 (685-1069)           | 1307 (795-1400)           |
| 2006 | Colombia     | 711 (504-741)             | 1061 (715-1117)           | 1365 (830-1462)           |
| 2007 | Colombia     | 659 (468-687)             | 984 (663-1036)            | 1266 (770-1356)           |
| 2008 | Colombia     | 568 (403-592)             | 848 (572-893)             | 1091 (664-1169)           |
| 2009 | Colombia     | 534 (379-557)             | 797 (537-839)             | 1026 (624-1099)           |
| 2010 | Colombia     | 456 (323-475)             | 691 (466-727)             | 901 (548-965)             |
| 2011 | Colombia     | 424 (301-442)             | 658 (444-693)             | 877 (534-939)             |
| 2012 | Colombia     | 325 (231-339)             | 527 (355-555)             | 733 (446-785)             |
| 2013 | Colombia     | 278 (197-289)             | 459 (310-484)             | 653 (397-700)             |
| 2014 | Colombia     | 200 (142-208)             | 346 (234-365)             | 519 (316-556)             |
| 2015 | Colombia     | 166 (118-173)             | 293 (198-309)             | 450 (274-482)             |
| 2000 | Comoros      | 89 (63-93)                | 133 (89-140)              | 171 (104-183)             |
| 2001 | Comoros      | 90 (64-94)                | 135 (91-142)              | 174 (106-186)             |
| 2002 | Comoros      | 93 (66-97)                | 138 (93-146)              | 178 (108-191)             |
| 2003 | Comoros      | 94 (67-98)                | 140 (95-148)              | 181 (110-194)             |
| 2004 | Comoros      | 95 (67-99)                | 141 (95-149)              | 182 (111-195)             |
| 2005 | Comoros      | 94 (67-98)                | 140 (95-148)              | 181 (110-194)             |
| 2006 | Comoros      | 93 (66-97)                | 139 (94-147)              | 179 (109-192)             |
| 2007 | Comoros      | 92 (66-96)                | 138 (93-145)              | 177 (108-190)             |
| 2008 | Comoros      | 92 (65-96)                | 137 (92-144)              | 176 (107-189)             |
| 2009 | Comoros      | 90 (64-94)                | 134 (90-141)              | 173 (105-185)             |
| 2010 | Comoros      | 88 (62-92)                | 131 (89-138)              | 169 (103-181)             |
| 2011 | Comoros      | 86 (61-89)                | 128 (86-135)              | 165 (100-176)             |
| 2012 | Comoros      | 83 (59-87)                | 124 (84-131)              | 160 (97-171)              |
| 2013 | Comoros      | 81 (57-84)                | 121 (81-127)              | 155 (95-167)              |
| 2014 | Comoros      | 79 (56-83)                | 118 (80-124)              | 152 (93-163)              |
| 2015 | Comoros      | 77 (55-80)                | 115 (77-121)              | 148 (90-158)              |
| 2000 | Congo        | 650 (461-677)             | 969 (654-1021)            | 1247 (759-1336)           |
| 2001 | Congo        | 673 (477-702)             | 1004 (677-1058)           | 1293 (786-1385)           |
| 2002 | Congo        | 676 (479-704)             | 1008 (680-1061)           | 1297 (789-1389)           |
| 2003 | Congo        | 663 (470-691)             | 989 (667-1041)            | 1272 (774-1363)           |
| 2004 | Congo        | 646 (458-673)             | 963 (650-1015)            | 1240 (754-1328)           |
| 2005 | Congo        | 623 (442-649)             | 929 (627-979)             | 1196 (728-1281)           |
| 2006 | Congo        | 595 (422-620)             | 887 (598-934)             | 1142 (695-1223)           |
| 2007 | Congo        | 567 (402-591)             | 845 (570-890)             | 1088 (662-1165)           |
| 2008 | Congo        | 535 (379-557)             | 797 (538-840)             | 1026 (624-1099)           |
| 2009 | Congo        | 498 (353-519)             | 743 (501-783)             | 956 (582-1024)            |
| 2010 | Congo        | 462 (328-482)             | 690 (465-726)             | 888 (540-951)             |
| 2011 | Congo        | 437 (310-455)             | 651 (439-686)             | 838 (510-898)             |
| 2012 | Congo        | 403 (285-420)             | 600 (405-632)             | 773 (470-828)             |
| 2013 | Congo        | 270 (192-282)             | 403 (272-424)             | 519 (316-556)             |
| 2014 | Congo        | 224 (159-234)             | 335 (226-352)             | 431 (262-461)             |
| 2015 | Congo        | 203 (144-212)             | 303 (204-319)             | 390 (237-418)             |
| 2000 | Cook Islands | 0 (0-0)                   | 0 (0-0)                   | 0 (0-0)                   |
| 2001 | Cook Islands | 0 (0-0)                   | 0 (0-0)                   | 0 (0-0)                   |
| 2002 | Cook Islands | 0 (0-0)                   | 0 (0-0)                   | 0 (0-0)                   |
| 2003 | Cook Islands | 0 (0-0)                   | 0 (0-0)                   | 0 (0-0)                   |
| 2004 | Cook Islands | 0 (0-0)                   | 0 (0-0)                   | 0 (0-0)                   |
| 2005 | Cook Islands | 0 (0-0)                   | 0 (0-0)                   | 0 (0-0)                   |
| 2006 | Cook Islands | 0 (0-0)                   | 0 (0-0)                   | 0 (0-0)                   |
| 2007 | Cook Islands | 0 (0-0)                   | 0 (0-0)                   | 0 (0-0)                   |
| 2008 | Cook Islands | 0 (0-0)                   | 0 (0-0)                   | 0 (0-0)                   |
| 2009 | Cook Islands | 0 (0-0)                   | 0 (0-0)                   | 0 (0-0)                   |
| 2010 | Cook Islands | 0 (0-0)                   | 0 (0-0)                   | 0 (0-0)                   |
| 2011 | Cook Islands | 0 (0-0)                   | 0 (0-0)                   | 0 (0-0)                   |
| 2012 | Cook Islands | 0 (0-0)                   | 0 (0-0)                   | 0 (0-0)                   |
| 2013 | Cook Islands | 0 (0-0)                   | 0 (0-0)                   | 0 (0-0)                   |
| 2014 | Cook Islands | 0 (0-0)                   | 0 (0-0)                   | 0 (0-0)                   |
| 2015 | Cook Islands | 0 (0-0)                   | 0 (0-0)                   | 0 (0-0)                   |
| 2000 | Costa Rica   | 24 (17-25)                | 35 (24-37)                | 45 (28-49)                |
| 2001 | Costa Rica   | 19 (14-20)                | 29 (19-30)                | 37 (22-40)                |
| 2002 | Costa Rica   | 17 (12-18)                | 25 (17-26)                | 32 (20-35)                |
| 2003 | Costa Rica   | 15 (10-15)                | 22 (15-23)                | 28 (17-30)                |
| 2004 | Costa Rica   | 14 (10-14)                | 21 (14-22)                | 26 (16-28)                |
| 2005 | Costa Rica   | 17 (12-18)                | 26 (17-27)                | 33 (20-35)                |
| 2006 | Costa Rica   | 10 (7-10)                 | 14 (10-15)                | 18 (11-20)                |
| 2007 | Costa Rica   | 13 (9-14)                 | 20 (13-21)                | 25 (15-27)                |
| 2008 | Costa Rica   | 8 (6-9)                   | 12 (8-13)                 | 16 (10-17)                |
| 2009 | Costa Rica   | 8 (6-8)                   | 11 (8-12)                 | 15 (9-16)                 |
| 2010 | Costa Rica   | 8 (6-9)                   | 13 (9-14)                 | 18 (11-19)                |
| 2011 | Costa Rica   | 8 (6-8)                   | 13 (8-13)                 | 17 (10-18)                |

Spn = Streptococcus pneumoniae; Uncertainty range provided in parentheses.



| Year | Country                               | Spn pneumonia deaths (UR) | Spn pneumonia deaths (UR) | Spn pneumonia deaths (UR) |
|------|---------------------------------------|---------------------------|---------------------------|---------------------------|
| 2012 | Costa Rica                            | 5 (3-5)                   | 7 (5-8)                   | 10 (6-11)                 |
| 2013 | Costa Rica                            | 6 (4-6)                   | 10 (7-10)                 | 15 (9-16)                 |
| 2014 | Costa Rica                            | 3 (2-4)                   | 6 (4-6)                   | 9 (6-10)                  |
| 2015 | Costa Rica                            | 3 (2-3)                   | 5 (3-5)                   | 8 (5-8)                   |
| 2000 | Cote d'Ivoire                         | 2369 (1680-2468)          | 3533 (2383-3721)          | 4547 (2766-4870)          |
| 2001 | Cote d'Ivoire                         | 2338 (1658-2436)          | 3487 (2352-3673)          | 4488 (2730-4807)          |
| 2002 | Cote d'Ivoire                         | 2286 (1621-2383)          | 3410 (2300-3592)          | 4389 (2670-4701)          |
| 2003 | Cote d'Ivoire                         | 2237 (1586-2331)          | 3336 (2250-3514)          | 4294 (2612-4599)          |
| 2004 | Cote d'Ivoire                         | 2179 (1545-2271)          | 3250 (2192-3423)          | 4183 (2545-4480)          |
| 2005 | Cote d'Ivoire                         | 2200 (1560-2293)          | 3281 (2213-3456)          | 4223 (2569-4523)          |
| 2006 | Cote d'Ivoire                         | 2260 (1602-2355)          | 3371 (2273-3550)          | 4338 (2639-4646)          |
| 2007 | Cote d'Ivoire                         | 2392 (1696-2493)          | 3568 (2406-3757)          | 4592 (2793-4918)          |
| 2008 | Cote d'Ivoire                         | 2506 (1777-2611)          | 3738 (2521-3936)          | 4811 (2927-5152)          |
| 2009 | Cote d'Ivoire                         | 2734 (1938-2849)          | 4077 (2750-4294)          | 5248 (3193-5620)          |
| 2010 | Cote d'Ivoire                         | 2940 (2085-3064)          | 4386 (2958-4619)          | 5645 (3434-6046)          |
| 2011 | Cote d'Ivoire                         | 3131 (2220-3263)          | 4670 (3149-4919)          | 6011 (3657-6438)          |
| 2012 | Cote d'Ivoire                         | 3241 (2298-3378)          | 4834 (3260-5091)          | 6222 (3785-6664)          |
| 2013 | Cote d'Ivoire                         | 3375 (2393-3517)          | 5033 (3394-5301)          | 6478 (3941-6938)          |
| 2014 | Cote d'Ivoire                         | 3426 (2429-3571)          | 5110 (3446-5382)          | 6577 (4001-7044)          |
| 2015 | Cote d'Ivoire                         | 2525 (1791-2632)          | 3767 (2540-3967)          | 4848 (2949-5192)          |
| 2000 | Croatia                               | 4 (3-4)                   | 5 (4-6)                   | 7 (4-7)                   |
| 2001 | Croatia                               | 2 (2-3)                   | 4 (2-4)                   | 5 (3-5)                   |
| 2002 | Croatia                               | 1 (1-2)                   | 2 (1-2)                   | 3 (2-3)                   |
| 2003 | Croatia                               | 3 (2-3)                   | 4 (3-4)                   | 5 (3-5)                   |
| 2004 | Croatia                               | 1 (0-1)                   | 1 (1-1)                   | 1 (1-1)                   |
| 2005 | Croatia                               | 3 (2-4)                   | 5 (3-5)                   | 7 (4-7)                   |
| 2006 | Croatia                               | 2 (2-2)                   | 3 (2-3)                   | 4 (3-4)                   |
| 2007 | Croatia                               | 3 (2-3)                   | 5 (3-5)                   | 6 (4-6)                   |
| 2008 | Croatia                               | 2 (2-2)                   | 3 (2-3)                   | 4 (2-4)                   |
| 2009 | Croatia                               | 2 (1-2)                   | 3 (2-3)                   | 4 (2-4)                   |
| 2010 | Croatia                               | 2 (1-2)                   | 3 (2-3)                   | 3 (2-4)                   |
| 2011 | Croatia                               | 0 (0-0)                   | 0 (0-0)                   | 0 (0-0)                   |
| 2012 | Croatia                               | 1 (0-1)                   | 1 (1-1)                   | 1 (1-1)                   |
| 2013 | Croatia                               | 3 (2-3)                   | 4 (3-4)                   | 5 (3-6)                   |
| 2014 | Croatia                               | 1 (1-1)                   | 2 (1-2)                   | 2 (1-2)                   |
| 2015 | Croatia                               | 1 (1-1)                   | 1 (1-2)                   | 2 (1-2)                   |
| 2000 | Cuba                                  | 26 (19-27)                | 39 (26-41)                | 50 (31-54)                |
| 2001 | Cuba                                  | 26 (19-27)                | 39 (26-41)                | 50 (31-54)                |
| 2002 | Cuba                                  | 22 (16-23)                | 33 (22-35)                | 43 (26-46)                |
| 2003 | Cuba                                  | 20 (14-21)                | 30 (21-32)                | 39 (24-42)                |
| 2004 | Cuba                                  | 18 (13-19)                | 27 (18-28)                | 35 (21-37)                |
| 2005 | Cuba                                  | 23 (17-24)                | 35 (23-37)                | 45 (27-48)                |
| 2006 | Cuba                                  | 25 (17-26)                | 37 (25-39)                | 47 (29-51)                |
| 2007 | Cuba                                  | 21 (15-21)                | 31 (21-32)                | 40 (24-42)                |
| 2008 | Cuba                                  | 17 (12-18)                | 25 (17-27)                | 33 (20-35)                |
| 2009 | Cuba                                  | 29 (20-30)                | 43 (29-45)                | 55 (33-59)                |
| 2010 | Cuba                                  | 20 (14-21)                | 30 (20-32)                | 39 (24-42)                |
| 2011 | Cuba                                  | 22 (15-23)                | 32 (22-34)                | 42 (25-45)                |
| 2012 | Cuba                                  | 24 (17-25)                | 36 (25-38)                | 47 (29-50)                |
| 2013 | Cuba                                  | 24 (17-25)                | 36 (24-38)                | 46 (28-50)                |
| 2014 | Cuba                                  | 22 (16-23)                | 33 (22-35)                | 43 (26-46)                |
| 2015 | Cuba                                  | 22 (16-23)                | 33 (22-35)                | 42 (26-45)                |
| 2000 | Cyprus                                | 1 (1-1)                   | 2 (1-2)                   | 3 (2-3)                   |
| 2001 | Cyprus                                | 1 (1-1)                   | 2 (1-2)                   | 2 (1-3)                   |
| 2002 | Cyprus                                | 1 (1-1)                   | 2 (1-2)                   | 2 (1-2)                   |
| 2003 | Cyprus                                | 1 (1-1)                   | 2 (1-2)                   | 2 (1-2)                   |
| 2004 | Cyprus                                | 1 (1-1)                   | 1 (1-1)                   | 2 (1-2)                   |
| 2005 | Cyprus                                | 1 (1-1)                   | 1 (1-1)                   | 2 (1-2)                   |
| 2006 | Cyprus                                | 1 (1-1)                   | 1 (1-1)                   | 1 (1-2)                   |
| 2007 | Cyprus                                | 1 (0-1)                   | 1 (1-1)                   | 1 (1-1)                   |
| 2008 | Cyprus                                | 1 (0-1)                   | 1 (1-1)                   | 1 (1-1)                   |
| 2009 | Cyprus                                | 1 (0-1)                   | 1 (1-1)                   | 1 (1-1)                   |
| 2010 | Cyprus                                | 0 (0-0)                   | 1 (0-1)                   | 1 (1-1)                   |
| 2011 | Cyprus                                | 0 (0-0)                   | 1 (0-1)                   | 1 (1-1)                   |
| 2012 | Cyprus                                | 0 (0-0)                   | 1 (0-1)                   | 1 (0-1)                   |
| 2013 | Cyprus                                | 0 (0-0)                   | 1 (0-1)                   | 1 (0-1)                   |
| 2014 | Cyprus                                | 0 (0-0)                   | 1 (0-1)                   | 1 (0-1)                   |
| 2015 | Cyprus                                | 0 (0-0)                   | 0 (0-0)                   | 0 (0-1)                   |
| 2000 | Czech Republic                        | 6 (4-6)                   | 9 (6-9)                   | 11 (7-12)                 |
| 2001 | Czech Republic                        | 7 (5-7)                   | 10 (7-11)                 | 13 (8-14)                 |
| 2002 | Czech Republic                        | 8 (6-9)                   | 12 (8-13)                 | 16 (10-17)                |
| 2003 | Czech Republic                        | 8 (6-8)                   | 12 (8-13)                 | 15 (9-17)                 |
| 2004 | Czech Republic                        | 5 (4-6)                   | 8 (5-8)                   | 10 (6-11)                 |
| 2005 | Czech Republic                        | 7 (5-8)                   | 11 (8-12)                 | 14 (9-15)                 |
| 2006 | Czech Republic                        | 10 (7-11)                 | 15 (10-16)                | 20 (12-21)                |
| 2007 | Czech Republic                        | 9 (7-10)                  | 14 (9-15)                 | 18 (11-19)                |
| 2008 | Czech Republic                        | 8 (6-8)                   | 12 (8-12)                 | 15 (9-16)                 |
| 2009 | Czech Republic                        | 6 (4-6)                   | 9 (6-10)                  | 12 (7-12)                 |
| 2010 | Czech Republic                        | 11 (8-12)                 | 17 (11-17)                | 21 (13-23)                |
| 2011 | Czech Republic                        | 7 (5-8)                   | 11 (7-12)                 | 14 (9-15)                 |
| 2012 | Czech Republic                        | 8 (6-8)                   | 12 (8-13)                 | 15 (9-17)                 |
| 2013 | Czech Republic                        | 10 (7-11)                 | 16 (11-16)                | 20 (12-22)                |
| 2014 | Czech Republic                        | 8 (5-8)                   | 11 (8-12)                 | 15 (9-16)                 |
| 2015 | Czech Republic                        | 7 (5-8)                   | 11 (8-12)                 | 14 (9-15)                 |
| 2000 | Democratic People's Republic of Korea | 1380 (978-1438)           | 2058 (1388-2167)          | 2649 (1611-2837)          |
| 2001 | Democratic People's Republic of Korea | 1126 (799-1174)           | 1680 (1133-1770)          | 2162 (1316-2316)          |
| 2002 | Democratic People's Republic of Korea | 917 (650-956)             | 1368 (922-1441)           | 1760 (1071-1886)          |
| 2003 | Democratic People's Republic of Korea | 762 (540-794)             | 1136 (766-1197)           | 1463 (890-1566)           |
| 2004 | Democratic People's Republic of Korea | 659 (467-687)             | 983 (663-1035)            | 1265 (770-1355)           |
| 2005 | Democratic People's Republic of Korea | 915 (435-639)             | 615 (617-963)             | 1177 (716-1261)           |
| 2006 | Democratic People's Republic of Korea | 598 (424-623)             | 892 (601-939)             | 1148 (698-1229)           |
| 2007 | Democratic People's Republic of Korea | 593 (420-618)             | 884 (596-931)             | 1138 (692-1219)           |
| 2008 | Democratic People's Republic of Korea | 574 (407-598)             | 856 (577-901)             | 1101 (670-1180)           |
| 2009 | Democratic People's Republic of Korea | 557 (395-581)             | 831 (560-875)             | 1069 (651-1145)           |
| 2010 | Democratic People's Republic of Korea | 536 (380-559)             | 800 (539-842)             | 1029 (626-1102)           |
| 2011 | Democratic People's Republic of Korea | 517 (366-538)             | 771 (520-812)             | 992 (603-1062)            |
| 2012 | Democratic People's Republic of Korea | 498 (353-519)             | 742 (501-782)             | 955 (581-1023)            |
| 2013 | Democratic People's Republic of Korea | 487 (345-508)             | 727 (490-765)             | 935 (569-1001)            |
| 2014 | Democratic People's Republic of Korea | 475 (337-495)             | 708 (478-746)             | 912 (555-976)             |
| 2015 | Democratic People's Republic of Korea | 458 (325-477)             | 683 (460-719)             | 879 (535-941)             |
| 2000 | Democratic Republic of the Congo      | 12202 (8652-12716)        | 18200 (12274-19167)       | 23424 (14250-25087)       |
| 2001 | Democratic Republic of the Congo      | 11857 (8408-12357)        | 17686 (11927-18626)       | 22762 (13848-24379)       |
| 2002 | Democratic Republic of the Congo      | 11727 (8316-12222)        | 17492 (11796-18422)       | 22513 (13696-24112)       |
| 2003 | Democratic Republic of the Congo      | 11524 (8107-12010)        | 17189 (11592-18103)       | 22123 (13459-23694)       |
| 2004 | Democratic Republic of the Congo      | 11538 (8181-12024)        | 17209 (11606-18125)       | 22149 (13475-23722)       |
| 2005 | Democratic Republic of the Congo      | 11112 (7879-11580)        | 16574 (11177-17456)       | 21332 (12977-22847)       |
| 2006 | Democratic Republic of the Congo      | 11369 (8062-11848)        | 16958 (11436-17859)       | 21825 (13278-23375)       |
| 2007 | Democratic Republic of the Congo      | 11434 (8107-11915)        | 17054 (11501-17961)       | 21949 (13353-23508)       |
| 2008 | Democratic Republic of the Congo      | 12091 (8574-12601)        | 18035 (12163-18994)       | 23212 (14121-24861)       |

| Year | Country                          | Spn pneumonia deaths (UR) | Spn pneumonia deaths (UR) | Spn pneumonia deaths (UR) |
|------|----------------------------------|---------------------------|---------------------------|---------------------------|
| 2009 | Democratic Republic of the Congo | 13436 (9527-14002)        | 20041 (13515-21106)       | 25793 (15691-27625)       |
| 2010 | Democratic Republic of the Congo | 14760 (10466-15382)       | 22015 (14847-23186)       | 28335 (17238-30347)       |
| 2011 | Democratic Republic of the Congo | 16072 (11396-16749)       | 23972 (16167-25247)       | 30854 (18770-33045)       |
| 2012 | Democratic Republic of the Congo | 16377 (11613-17068)       | 24428 (16474-25727)       | 31440 (19127-33673)       |
| 2013 | Democratic Republic of the Congo | 15357 (10890-16005)       | 22907 (15448-24125)       | 29482 (17936-31576)       |
| 2014 | Democratic Republic of the Congo | 13144 (9320-13698)        | 19605 (13221-20648)       | 25233 (15350-27025)       |
| 2015 | Democratic Republic of the Congo | 11423 (8100-11904)        | 17038 (11490-17944)       | 21929 (13340-23486)       |
| 2000 | Denmark                          | 3 (2-3)                   | 5 (3-5)                   | 6 (4-7)                   |
| 2001 | Denmark                          | 3 (2-3)                   | 5 (3-5)                   | 6 (4-7)                   |
| 2002 | Denmark                          | 4 (3-4)                   | 6 (4-6)                   | 7 (4-8)                   |
| 2003 | Denmark                          | 4 (3-4)                   | 6 (4-6)                   | 8 (5-9)                   |
| 2004 | Denmark                          | 2 (1-2)                   | 3 (2-3)                   | 4 (2-4)                   |
| 2005 | Denmark                          | 3 (2-3)                   | 4 (3-5)                   | 6 (4-6)                   |
| 2006 | Denmark                          | 1 (1-1)                   | 2 (1-2)                   | 2 (2-3)                   |
| 2007 | Denmark                          | 0 (0-1)                   | 1 (0-1)                   | 1 (1-1)                   |
| 2008 | Denmark                          | 1 (1-1)                   | 1 (1-1)                   | 2 (1-2)                   |
| 2009 | Denmark                          | 2 (2-2)                   | 4 (2-4)                   | 5 (3-5)                   |
| 2010 | Denmark                          | 1 (1-1)                   | 1 (1-1)                   | 2 (1-2)                   |
| 2011 | Denmark                          | 1 (0-1)                   | 1 (1-1)                   | 2 (1-2)                   |
| 2012 | Denmark                          | 0 (0-1)                   | 1 (1-1)                   | 1 (1-1)                   |
| 2013 | Denmark                          | 0 (0-0)                   | 1 (0-1)                   | 1 (1-1)                   |
| 2014 | Denmark                          | 0 (0-0)                   | 0 (0-0)                   | 1 (0-1)                   |
| 2015 | Denmark                          | 0 (0-0)                   | 0 (0-0)                   | 1 (0-1)                   |
| 2000 | Djibouti                         | 100 (71-104)              | 149 (100-157)             | 192 (117-205)             |
| 2001 | Djibouti                         | 97 (69-101)               | 145 (98-153)              | 186 (113-200)             |
| 2002 | Djibouti                         | 95 (67-99)                | 141 (95-149)              | 182 (111-195)             |
| 2003 | Djibouti                         | 93 (66-97)                | 138 (93-146)              | 178 (108-191)             |
| 2004 | Djibouti                         | 90 (64-94)                | 135 (91-142)              | 173 (105-185)             |
| 2005 | Djibouti                         | 87 (62-91)                | 130 (88-137)              | 168 (102-179)             |
| 2006 | Djibouti                         | 85 (60-88)                | 126 (85-133)              | 162 (99-174)              |
| 2007 | Djibouti                         | 81 (58-85)                | 121 (82-128)              | 156 (95-167)              |
| 2008 | Djibouti                         | 78 (55-81)                | 116 (78-122)              | 149 (91-160)              |
| 2009 | Djibouti                         | 74 (53-77)                | 110 (74-116)              | 142 (86-152)              |
| 2010 | Djibouti                         | 71 (51-74)                | 106 (72-112)              | 137 (83-147)              |
| 2011 | Djibouti                         | 70 (49-73)                | 104 (70-109)              | 134 (81-143)              |
| 2012 | Djibouti                         | 70 (49-73)                | 104 (70-110)              | 134 (81-143)              |
| 2013 | Djibouti                         | 47 (33-49)                | 70 (47-74)                | 90 (55-97)                |
| 2014 | Djibouti                         | 40 (29-42)                | 60 (41-63)                | 78 (47-83)                |
| 2015 | Djibouti                         | 35 (25-36)                | 52 (35-55)                | 67 (41-72)                |
| 2000 | Dominica                         | 0 (0-0)                   | 0 (0-0)                   | 0 (0-0)                   |
| 2001 | Dominica                         | 0 (0-0)                   | 0 (0-0)                   | 0 (0-0)                   |
| 2002 | Dominica                         | 0 (0-0)                   | 0 (0-0)                   | 0 (0-0)                   |
| 2003 | Dominica                         | 0 (0-0)                   | 0 (0-0)                   | 0 (0-0)                   |
| 2004 | Dominica                         | 0 (0-0)                   | 0 (0-0)                   | 0 (0-0)                   |
| 2005 | Dominica                         | 0 (0-0)                   | 0 (0-0)                   | 0 (0-1)                   |
| 2006 | Dominica                         | 0 (0-0)                   | 0 (0-0)                   | 1 (0-1)                   |
| 2007 | Dominica                         | 1 (0-1)                   | 1 (1-1)                   | 1 (1-1)                   |
| 2008 | Dominica                         | 0 (0-0)                   | 1 (0-1)                   | 1 (0-1)                   |
| 2009 | Dominica                         | 0 (0-0)                   | 0 (0-1)                   | 1 (0-1)                   |
| 2010 | Dominica                         | 0 (0-0)                   | 0 (0-0)                   | 0 (0-0)                   |
| 2011 | Dominica                         | 0 (0-0)                   | 0 (0-0)                   | 0 (0-0)                   |
| 2012 | Dominica                         | 0 (0-0)                   | 0 (0-1)                   | 1 (0-1)                   |
| 2013 | Dominica                         | 0 (0-0)                   | 1 (0-1)                   | 1 (0-1)                   |
| 2014 | Dominica                         | 0 (0-0)                   | 1 (0-1)                   | 1 (0-1)                   |
| 2015 | Dominica                         | 0 (0-0)                   | 0 (0-0)                   | 1 (0-1)                   |
| 2000 | Dominican Republic               | 286 (203-298)             | 427 (288-450)             | 550 (334-589)             |
| 2001 | Dominican Republic               | 265 (188-277)             | 396 (267-417)             | 510 (310-546)             |
| 2002 | Dominican Republic               | 252 (178-262)             | 375 (253-395)             | 483 (294-517)             |
| 2003 | Dominican Republic               | 243 (173-254)             | 363 (245-382)             | 467 (284-500)             |
| 2004 | Dominican Republic               | 236 (167-246)             | 352 (237-371)             | 453 (276-485)             |
| 2005 | Dominican Republic               | 225 (159-234)             | 335 (226-353)             | 432 (263-462)             |
| 2006 | Dominican Republic               | 216 (153-225)             | 322 (217-339)             | 414 (252-444)             |
| 2007 | Dominican Republic               | 205 (146-214)             | 306 (206-322)             | 394 (240-422)             |
| 2008 | Dominican Republic               | 199 (141-208)             | 297 (200-313)             | 383 (233-410)             |
| 2009 | Dominican Republic               | 192 (136-201)             | 287 (194-302)             | 369 (225-396)             |
| 2010 | Dominican Republic               | 191 (136-199)             | 285 (192-300)             | 367 (223-393)             |
| 2011 | Dominican Republic               | 190 (135-198)             | 283 (191-298)             | 364 (222-390)             |
| 2012 | Dominican Republic               | 189 (134-197)             | 282 (190-297)             | 363 (221-388)             |
| 2013 | Dominican Republic               | 191 (135-199)             | 285 (192-300)             | 367 (223-393)             |
| 2014 | Dominican Republic               | 167 (119-174)             | 250 (168-263)             | 321 (195-344)             |
| 2015 | Dominican Republic               | 176 (125-184)             | 263 (177-277)             | 338 (206-362)             |
| 2000 | Ecuador                          | 447 (317-465)             | 666 (449-701)             | 857 (522-918)             |
| 2001 | Ecuador                          | 425 (301-443)             | 633 (427-667)             | 815 (496-873)             |
| 2002 | Ecuador                          | 402 (285-419)             | 599 (404-631)             | 771 (469-826)             |
| 2003 | Ecuador                          | 399 (283-416)             | 595 (401-626)             | 765 (466-820)             |
| 2004 | Ecuador                          | 417 (296-435)             | 622 (419-655)             | 800 (487-857)             |
| 2005 | Ecuador                          | 405 (287-422)             | 605 (408-637)             | 778 (473-833)             |
| 2006 | Ecuador                          | 396 (281-412)             | 590 (398-622)             | 760 (462-813)             |
| 2007 | Ecuador                          | 387 (275-404)             | 578 (390-609)             | 744 (452-797)             |
| 2008 | Ecuador                          | 391 (277-407)             | 583 (393-614)             | 750 (456-804)             |
| 2009 | Ecuador                          | 382 (271-398)             | 570 (384-600)             | 734 (446-786)             |
| 2010 | Ecuador                          | 361 (256-377)             | 542 (366-571)             | 701 (427-751)             |
| 2011 | Ecuador                          | 299 (212-312)             | 466 (314-490)             | 624 (379-668)             |
| 2012 | Ecuador                          | 222 (157-231)             | 364 (245-383)             | 512 (311-548)             |
| 2013 | Ecuador                          | 193 (137-201)             | 322 (217-339)             | 462 (281-495)             |
| 2014 | Ecuador                          | 137 (97-143)              | 239 (161-252)             | 360 (219-385)             |
| 2015 | Ecuador                          | 113 (80-118)              | 201 (136-212)             | 309 (188-331)             |
| 2000 | Egypt                            | 4163 (2952-4238)          | 6209 (4187-6539)          | 7992 (4862-8559)          |
| 2001 | Egypt                            | 3844 (2726-4007)          | 5734 (3867-6039)          | 7380 (4490-7905)          |
| 2002 | Egypt                            | 3547 (2515-3696)          | 5290 (3568-5572)          | 6809 (4142-7292)          |
| 2003 | Egypt                            | 3269 (2318-3407)          | 4877 (3289-5136)          | 6276 (3818-6722)          |
| 2004 | Egypt                            | 3053 (2165-3182)          | 4554 (3071-4796)          | 5861 (3566-6277)          |
| 2005 | Egypt                            | 2828 (2005-2947)          | 4218 (2845-4442)          | 5429 (3303-5814)          |
| 2006 | Egypt                            | 2646 (1877-2758)          | 3947 (2662-4157)          | 5081 (3091-5441)          |
| 2007 | Egypt                            | 2488 (1764-2593)          | 3711 (2503-3908)          | 4776 (2906-5115)          |
| 2008 | Egypt                            | 2329 (1651-2427)          | 3473 (2342-3658)          | 4470 (2719-4788)          |
| 2009 | Egypt                            | 2221 (1575-2315)          | 3313 (2235-3490)          | 4265 (2594-4567)          |
| 2010 | Egypt                            | 2161 (1533-2253)          | 3224 (2174-3395)          | 4149 (2524-4444)          |
| 2011 | Egypt                            | 2145 (1521-2235)          | 3199 (2158-3370)          | 4118 (2505-4410)          |
| 2012 | Egypt                            | 2174 (1542-2266)          | 3243 (2187-3416)          | 4174 (2539-4471)          |
| 2013 | Egypt                            | 2216 (1571-2310)          | 3306 (2229-3481)          | 4254 (2588-4557)          |
| 2014 | Egypt                            | 2696 (1912-2810)          | 4021 (2712-4235)          | 5175 (3148-5543)          |
| 2015 | Egypt                            | 2715 (1925-2829)          | 4049 (2731-4264)          | 5211 (3170-5581)          |
| 2000 | El Salvador                      | 253 (179-264)             | 378 (255-398)             | 486 (296-520)             |
| 2001 | El Salvador                      | 221 (156-230)             | 329 (222-347)             | 424 (258-454)             |
| 2002 | El Salvador                      | 219 (155-228)             | 326 (220-343)             | 420 (255-449)             |
| 2003 | El Salvador                      | 198 (141-207)             | 296 (200-312)             | 381 (232-408)             |
| 2004 | El Salvador                      | 178 (126-186)             | 266 (179-280)             | 342 (208-366)             |
| 2005 | El Salvador                      | 163 (115-170)             | 243 (164-256)             | 312 (190-335)             |

| Year | Country           | Spn pneumonia deaths (UR) | Spn pneumonia deaths (UR) | Spn pneumonia deaths (UR) |
|------|-------------------|---------------------------|---------------------------|---------------------------|
| 2006 | El Salvador       | 148 (105-154)             | 220 (149-232)             | 284 (173-304)             |
| 2007 | El Salvador       | 138 (88-144)              | 206 (139-216)             | 265 (161-283)             |
| 2008 | El Salvador       | 126 (89-131)              | 187 (126-197)             | 241 (147-258)             |
| 2009 | El Salvador       | 116 (82-121)              | 173 (117-182)             | 222 (135-238)             |
| 2010 | El Salvador       | 95 (67-99)                | 145 (98-153)              | 191 (116-205)             |
| 2011 | El Salvador       | 71 (50-74)                | 114 (77-120)              | 156 (95-168)              |
| 2012 | El Salvador       | 53 (38-55)                | 89 (60-93)                | 127 (77-136)              |
| 2013 | El Salvador       | 45 (32-47)                | 77 (52-81)                | 112 (68-120)              |
| 2014 | El Salvador       | 31 (22-32)                | 54 (37-57)                | 83 (51-89)                |
| 2015 | El Salvador       | 25 (18-26)                | 45 (30-47)                | 70 (43-75)                |
| 2000 | Equatorial Guinea | 143 (101-149)             | 213 (144-224)             | 274 (167-293)             |
| 2001 | Equatorial Guinea | 137 (87-143)              | 204 (138-215)             | 263 (160-281)             |
| 2002 | Equatorial Guinea | 128 (81-133)              | 191 (129-201)             | 245 (149-263)             |
| 2003 | Equatorial Guinea | 117 (83-122)              | 175 (118-184)             | 225 (137-241)             |
| 2004 | Equatorial Guinea | 109 (77-114)              | 163 (110-171)             | 209 (127-224)             |
| 2005 | Equatorial Guinea | 107 (76-111)              | 159 (108-168)             | 205 (125-220)             |
| 2006 | Equatorial Guinea | 113 (80-118)              | 168 (114-177)             | 217 (132-232)             |
| 2007 | Equatorial Guinea | 122 (87-127)              | 182 (123-192)             | 234 (143-251)             |
| 2008 | Equatorial Guinea | 130 (92-135)              | 193 (130-203)             | 249 (151-266)             |
| 2009 | Equatorial Guinea | 133 (94-139)              | 198 (134-209)             | 255 (155-273)             |
| 2010 | Equatorial Guinea | 134 (95-139)              | 199 (134-210)             | 256 (156-275)             |
| 2011 | Equatorial Guinea | 130 (92-136)              | 194 (131-205)             | 250 (152-268)             |
| 2012 | Equatorial Guinea | 125 (88-130)              | 186 (125-196)             | 239 (146-256)             |
| 2013 | Equatorial Guinea | 126 (90-132)              | 188 (127-198)             | 242 (147-260)             |
| 2014 | Equatorial Guinea | 128 (90-133)              | 190 (128-200)             | 245 (149-262)             |
| 2015 | Equatorial Guinea | 125 (88-130)              | 186 (125-196)             | 239 (146-256)             |
| 2000 | Eritrea           | 682 (484-711)             | 1017 (686-1071)           | 1309 (796-1402)           |
| 2001 | Eritrea           | 675 (479-704)             | 1007 (679-1061)           | 1297 (789-1389)           |
| 2002 | Eritrea           | 673 (477-702)             | 1004 (677-1058)           | 1292 (786-1384)           |
| 2003 | Eritrea           | 673 (477-701)             | 1004 (677-1057)           | 1292 (786-1383)           |
| 2004 | Eritrea           | 672 (476-700)             | 1002 (676-1056)           | 1290 (785-1382)           |
| 2005 | Eritrea           | 666 (472-694)             | 994 (670-1047)            | 1279 (778-1370)           |
| 2006 | Eritrea           | 662 (470-690)             | 988 (666-1041)            | 1272 (774-1362)           |
| 2007 | Eritrea           | 651 (462-679)             | 972 (655-1023)            | 1251 (761-1339)           |
| 2008 | Eritrea           | 634 (450-661)             | 946 (638-997)             | 1218 (741-1304)           |
| 2009 | Eritrea           | 614 (436-640)             | 916 (618-965)             | 1179 (718-1263)           |
| 2010 | Eritrea           | 596 (423-621)             | 889 (600-937)             | 1145 (696-1226)           |
| 2011 | Eritrea           | 577 (409-602)             | 861 (581-907)             | 1108 (674-1187)           |
| 2012 | Eritrea           | 556 (394-580)             | 830 (560-874)             | 1068 (650-1144)           |
| 2013 | Eritrea           | 535 (379-557)             | 797 (538-840)             | 1026 (624-1099)           |
| 2014 | Eritrea           | 519 (368-541)             | 774 (522-815)             | 996 (606-1066)            |
| 2015 | Eritrea           | 500 (355-521)             | 746 (503-786)             | 961 (584-1029)            |
| 2000 | Estonia           | 2 (1-2)                   | 2 (2-3)                   | 3 (2-3)                   |
| 2001 | Estonia           | 1 (0-1)                   | 1 (1-1)                   | 1 (1-1)                   |
| 2002 | Estonia           | 2 (1-2)                   | 3 (2-3)                   | 4 (2-4)                   |
| 2003 | Estonia           | 1 (1-1)                   | 2 (1-2)                   | 2 (1-2)                   |
| 2004 | Estonia           | 2 (1-2)                   | 2 (2-3)                   | 3 (2-3)                   |
| 2005 | Estonia           | 2 (1-2)                   | 2 (2-3)                   | 3 (2-3)                   |
| 2006 | Estonia           | 0 (0-0)                   | 0 (0-0)                   | 0 (0-0)                   |
| 2007 | Estonia           | 1 (1-1)                   | 1 (1-1)                   | 2 (1-2)                   |
| 2008 | Estonia           | 0 (0-0)                   | 1 (0-1)                   | 1 (1-1)                   |
| 2009 | Estonia           | 1 (1-1)                   | 1 (1-2)                   | 2 (1-2)                   |
| 2010 | Estonia           | 2 (1-2)                   | 3 (2-3)                   | 3 (2-4)                   |
| 2011 | Estonia           | 1 (1-1)                   | 1 (1-1)                   | 1 (1-2)                   |
| 2012 | Estonia           | 1 (1-1)                   | 1 (1-1)                   | 2 (1-2)                   |
| 2013 | Estonia           | 1 (1-1)                   | 1 (1-1)                   | 2 (1-2)                   |
| 2014 | Estonia           | 1 (1-1)                   | 1 (1-1)                   | 2 (1-2)                   |
| 2015 | Estonia           | 1 (1-1)                   | 1 (1-1)                   | 1 (1-1)                   |
| 2000 | Ethiopia          | 24802 (17587-25847)       | 36994 (24948-38961)       | 47613 (28966-50995)       |
| 2001 | Ethiopia          | 24253 (17198-25275)       | 36175 (24396-38099)       | 46559 (28325-49866)       |
| 2002 | Ethiopia          | 23217 (16463-24196)       | 34631 (23354-36472)       | 44571 (27115-47737)       |
| 2003 | Ethiopia          | 21886 (15519-22808)       | 32645 (22015-34381)       | 42015 (25560-44999)       |
| 2004 | Ethiopia          | 20400 (14465-21260)       | 30428 (20520-32046)       | 39162 (23825-41944)       |
| 2005 | Ethiopia          | 18908 (13407-19705)       | 28203 (19019-29702)       | 36298 (22082-38876)       |
| 2006 | Ethiopia          | 18146 (12868-18911)       | 27067 (18253-28506)       | 34836 (21193-37311)       |
| 2007 | Ethiopia          | 16567 (11748-17266)       | 24712 (16665-26026)       | 31805 (19349-34064)       |
| 2008 | Ethiopia          | 14618 (10366-15235)       | 21805 (14705-22964)       | 28064 (17073-30057)       |
| 2009 | Ethiopia          | 14003 (9929-14593)        | 20887 (14086-21997)       | 26882 (16354-28791)       |
| 2010 | Ethiopia          | 13052 (9255-13602)        | 19468 (13129-20503)       | 25056 (15243-26836)       |
| 2011 | Ethiopia          | 11671 (8276-12163)        | 17408 (11740-18333)       | 22405 (13630-23996)       |
| 2012 | Ethiopia          | 9846 (6982-10261)         | 14687 (9905-15468)        | 18903 (11500-20245)       |
| 2013 | Ethiopia          | 8042 (5702-8381)          | 11995 (8089-12633)        | 15438 (9392-16534)        |
| 2014 | Ethiopia          | 6856 (4862-7145)          | 10226 (6896-10770)        | 13162 (8007-14096)        |
| 2015 | Ethiopia          | 4622 (3277-4817)          | 6894 (4649-7261)          | 8873 (5398-9503)          |
| 2000 | Fiji              | 18 (13-19)                | 27 (18-28)                | 35 (21-37)                |
| 2001 | Fiji              | 17 (12-18)                | 26 (17-27)                | 33 (20-36)                |
| 2002 | Fiji              | 17 (12-18)                | 25 (17-27)                | 33 (20-35)                |
| 2003 | Fiji              | 17 (12-18)                | 25 (17-27)                | 32 (20-35)                |
| 2004 | Fiji              | 17 (12-18)                | 26 (17-27)                | 33 (20-35)                |
| 2005 | Fiji              | 18 (13-18)                | 26 (18-28)                | 34 (21-36)                |
| 2006 | Fiji              | 19 (13-20)                | 28 (19-30)                | 36 (22-39)                |
| 2007 | Fiji              | 20 (14-21)                | 30 (20-31)                | 38 (23-41)                |
| 2008 | Fiji              | 21 (15-21)                | 31 (21-32)                | 40 (24-42)                |
| 2009 | Fiji              | 21 (15-22)                | 31 (21-33)                | 40 (24-43)                |
| 2010 | Fiji              | 20 (14-21)                | 30 (21-32)                | 39 (24-42)                |
| 2011 | Fiji              | 20 (14-21)                | 30 (20-31)                | 38 (23-41)                |
| 2012 | Fiji              | 19 (14-20)                | 29 (19-30)                | 37 (22-40)                |
| 2013 | Fiji              | 10 (7-11)                 | 17 (12-18)                | 25 (15-27)                |
| 2014 | Fiji              | 9 (6-9)                   | 15 (10-16)                | 22 (13-23)                |
| 2015 | Fiji              | 8 (6-8)                   | 14 (9-15)                 | 21 (13-22)                |
| 2000 | Finland           | 2 (1-2)                   | 2 (2-3)                   | 3 (2-3)                   |
| 2001 | Finland           | 3 (2-3)                   | 5 (3-5)                   | 6 (4-7)                   |
| 2002 | Finland           | 0 (0-0)                   | 0 (0-0)                   | 0 (0-0)                   |
| 2003 | Finland           | 5 (3-5)                   | 7 (5-7)                   | 9 (5-9)                   |
| 2004 | Finland           | 1 (1-1)                   | 2 (1-2)                   | 3 (2-3)                   |
| 2005 | Finland           | 2 (1-2)                   | 3 (2-3)                   | 3 (2-4)                   |
| 2006 | Finland           | 0 (0-0)                   | 0 (0-0)                   | 0 (0-0)                   |
| 2007 | Finland           | 2 (1-2)                   | 3 (2-3)                   | 4 (2-4)                   |
| 2008 | Finland           | 2 (1-2)                   | 3 (2-3)                   | 3 (2-4)                   |
| 2009 | Finland           | 2 (1-2)                   | 2 (2-2)                   | 3 (2-3)                   |
| 2010 | Finland           | 1 (1-1)                   | 2 (1-2)                   | 2 (1-2)                   |
| 2011 | Finland           | 3 (2-3)                   | 4 (3-4)                   | 5 (3-5)                   |
| 2012 | Finland           | 1 (0-1)                   | 1 (1-1)                   | 1 (1-1)                   |
| 2013 | Finland           | 1 (1-1)                   | 1 (1-1)                   | 2 (1-2)                   |
| 2014 | Finland           | 1 (1-1)                   | 1 (1-1)                   | 2 (1-2)                   |
| 2015 | Finland           | 1 (0-1)                   | 1 (1-1)                   | 2 (1-2)                   |
| 2000 | France            | 23 (16-24)                | 34 (23-35)                | 43 (26-46)                |
| 2001 | France            | 20 (14-21)                | 30 (21-32)                | 39 (24-42)                |
| 2002 | France            | 20 (14-21)                | 30 (20-32)                | 39 (23-41)                |

Spn = Streptococcus pneumoniae; Uncertainty range provided in parentheses.

| Year | Country | Spn pneumonia deaths (UR) | Spn pneumonia deaths (UR) | Spn pneumonia deaths (UR) |
|------|---------|---------------------------|---------------------------|---------------------------|
| 2003 | France  | 24 (17-25)                | 35 (24-37)                | 45 (28-49)                |
| 2004 | France  | 14 (10-14)                | 21 (14-22)                | 27 (16-28)                |
| 2005 | France  | 25 (18-26)                | 38 (25-40)                | 48 (29-52)                |
| 2006 | France  | 13 (9-13)                 | 20 (14-21)                | 27 (16-29)                |
| 2007 | France  | 20 (14-21)                | 32 (22-34)                | 44 (27-48)                |
| 2008 | France  | 12 (8-12)                 | 19 (13-20)                | 27 (16-29)                |
| 2009 | France  | 14 (10-15)                | 23 (16-24)                | 33 (20-35)                |
| 2010 | France  | 16 (11-17)                | 26 (18-28)                | 37 (22-39)                |
| 2011 | France  | 9 (6-9)                   | 16 (11-17)                | 25 (15-26)                |
| 2012 | France  | 7 (5-7)                   | 12 (8-13)                 | 20 (12-21)                |
| 2013 | France  | 6 (4-6)                   | 11 (7-11)                 | 18 (11-19)                |
| 2014 | France  | 6 (4-6)                   | 10 (7-11)                 | 17 (10-18)                |
| 2015 | France  | 6 (4-6)                   | 10 (7-11)                 | 17 (10-18)                |
| 2000 | Gabon   | 106 (75-111)              | 158 (107-167)             | 204 (124-218)             |
| 2001 | Gabon   | 110 (78-115)              | 164 (111-173)             | 212 (129-227)             |
| 2002 | Gabon   | 114 (81-119)              | 170 (115-179)             | 219 (133-234)             |
| 2003 | Gabon   | 118 (83-123)              | 176 (118-185)             | 226 (137-242)             |
| 2004 | Gabon   | 120 (85-125)              | 179 (121-189)             | 231 (140-247)             |
| 2005 | Gabon   | 122 (86-127)              | 182 (122-191)             | 234 (142-250)             |
| 2006 | Gabon   | 122 (87-128)              | 183 (123-192)             | 235 (143-252)             |
| 2007 | Gabon   | 123 (87-128)              | 184 (124-193)             | 236 (144-253)             |
| 2008 | Gabon   | 122 (86-127)              | 182 (123-192)             | 234 (142-251)             |
| 2009 | Gabon   | 121 (86-126)              | 181 (122-191)             | 233 (142-249)             |
| 2010 | Gabon   | 119 (85-124)              | 178 (120-187)             | 229 (139-245)             |
| 2011 | Gabon   | 119 (84-124)              | 177 (119-186)             | 228 (139-244)             |
| 2012 | Gabon   | 116 (83-121)              | 174 (117-183)             | 223 (136-239)             |
| 2013 | Gabon   | 114 (81-119)              | 170 (115-179)             | 219 (133-234)             |
| 2014 | Gabon   | 110 (78-115)              | 164 (111-173)             | 211 (129-226)             |
| 2015 | Gabon   | 107 (76-112)              | 160 (108-169)             | 206 (125-221)             |
| 2000 | Gambia  | 343 (243-357)             | 511 (345-538)             | 658 (400-705)             |
| 2001 | Gambia  | 335 (238-349)             | 500 (337-527)             | 643 (391-689)             |
| 2002 | Gambia  | 343 (243-358)             | 512 (345-539)             | 659 (401-706)             |
| 2003 | Gambia  | 341 (242-355)             | 508 (343-535)             | 654 (398-701)             |
| 2004 | Gambia  | 337 (239-352)             | 503 (339-530)             | 648 (394-694)             |
| 2005 | Gambia  | 336 (238-350)             | 501 (338-528)             | 645 (392-691)             |
| 2006 | Gambia  | 334 (237-348)             | 499 (336-525)             | 642 (390-687)             |
| 2007 | Gambia  | 330 (234-344)             | 492 (332-519)             | 634 (386-679)             |
| 2008 | Gambia  | 327 (232-340)             | 487 (329-513)             | 627 (381-672)             |
| 2009 | Gambia  | 324 (229-337)             | 483 (325-508)             | 621 (378-665)             |
| 2010 | Gambia  | 280 (198-292)             | 417 (281-440)             | 537 (327-575)             |
| 2011 | Gambia  | 228 (162-238)             | 340 (230-359)             | 438 (267-469)             |
| 2012 | Gambia  | 166 (118-173)             | 248 (167-261)             | 319 (194-342)             |
| 2013 | Gambia  | 150 (106-156)             | 224 (151-236)             | 288 (175-309)             |
| 2014 | Gambia  | 111 (79-116)              | 166 (112-175)             | 213 (130-228)             |
| 2015 | Gambia  | 96 (68-100)               | 144 (97-151)              | 185 (113-198)             |
| 2000 | Georgia | 69 (49-72)                | 104 (70-109)              | 133 (81-143)              |
| 2001 | Georgia | 59 (42-62)                | 89 (60-93)                | 114 (69-122)              |
| 2002 | Georgia | 52 (37-55)                | 78 (53-82)                | 101 (61-108)              |
| 2003 | Georgia | 47 (33-49)                | 70 (47-74)                | 90 (55-97)                |
| 2004 | Georgia | 43 (30-44)                | 64 (43-67)                | 82 (50-88)                |
| 2005 | Georgia | 39 (28-41)                | 59 (39-62)                | 75 (46-81)                |
| 2006 | Georgia | 36 (26-38)                | 54 (36-57)                | 70 (42-74)                |
| 2007 | Georgia | 33 (23-34)                | 49 (33-52)                | 63 (39-68)                |
| 2008 | Georgia | 30 (21-31)                | 44 (30-47)                | 57 (35-61)                |
| 2009 | Georgia | 27 (19-28)                | 40 (27-42)                | 51 (31-55)                |
| 2010 | Georgia | 26 (18-27)                | 39 (26-41)                | 50 (30-54)                |
| 2011 | Georgia | 25 (18-26)                | 37 (25-39)                | 48 (29-51)                |
| 2012 | Georgia | 22 (15-23)                | 32 (22-34)                | 42 (25-45)                |
| 2013 | Georgia | 19 (13-20)                | 28 (19-30)                | 36 (22-39)                |
| 2014 | Georgia | 17 (12-18)                | 26 (17-27)                | 33 (20-35)                |
| 2015 | Georgia | 15 (11-15)                | 22 (15-24)                | 29 (18-31)                |
| 2000 | Germany | 29 (21-30)                | 43 (29-46)                | 56 (34-60)                |
| 2001 | Germany | 43 (31-45)                | 64 (43-68)                | 83 (50-89)                |
| 2002 | Germany | 37 (26-38)                | 55 (37-57)                | 70 (43-75)                |
| 2003 | Germany | 36 (26-38)                | 54 (37-57)                | 70 (43-75)                |
| 2004 | Germany | 34 (24-35)                | 51 (34-54)                | 65 (40-70)                |
| 2005 | Germany | 25 (18-26)                | 37 (25-39)                | 48 (29-52)                |
| 2006 | Germany | 19 (14-20)                | 29 (20-31)                | 38 (23-41)                |
| 2007 | Germany | 19 (13-20)                | 30 (20-31)                | 40 (24-43)                |
| 2008 | Germany | 20 (14-21)                | 32 (22-34)                | 44 (27-47)                |
| 2009 | Germany | 17 (12-18)                | 28 (19-30)                | 40 (24-43)                |
| 2010 | Germany | 5 (4-6)                   | 10 (6-10)                 | 15 (9-16)                 |
| 2011 | Germany | 6 (4-6)                   | 11 (7-12)                 | 18 (11-19)                |
| 2012 | Germany | 4 (3-4)                   | 7 (5-8)                   | 12 (7-13)                 |
| 2013 | Germany | 4 (3-4)                   | 7 (5-8)                   | 12 (7-13)                 |
| 2014 | Germany | 4 (3-4)                   | 8 (5-8)                   | 12 (7-13)                 |
| 2015 | Germany | 4 (3-4)                   | 8 (5-8)                   | 12 (8-13)                 |
| 2000 | Ghana   | 2135 (1514-2225)          | 3185 (2148-3355)          | 4100 (2494-4391)          |
| 2001 | Ghana   | 2195 (1557-2288)          | 3274 (2208-3448)          | 4214 (2564-4513)          |
| 2002 | Ghana   | 2283 (1619-2380)          | 3406 (2297-3587)          | 4384 (2667-4695)          |
| 2003 | Ghana   | 2328 (1651-2426)          | 3473 (2342-3657)          | 4469 (2719-4787)          |
| 2004 | Ghana   | 2430 (1723-2533)          | 3625 (2444-3817)          | 4665 (2838-4997)          |
| 2005 | Ghana   | 2512 (1781-2618)          | 3747 (2527-3946)          | 4823 (2934-5165)          |
| 2006 | Ghana   | 2619 (1857-2729)          | 3906 (2634-4113)          | 5027 (3058-5384)          |
| 2007 | Ghana   | 2633 (1867-2744)          | 3927 (2648-4135)          | 5054 (3074-5413)          |
| 2008 | Ghana   | 2542 (1802-2649)          | 3791 (2557-3993)          | 4879 (2968-5226)          |
| 2009 | Ghana   | 2522 (1789-2629)          | 3762 (2537-3962)          | 4842 (2946-5186)          |
| 2010 | Ghana   | 2470 (1752-2575)          | 3685 (2485-3881)          | 4743 (2885-5079)          |
| 2011 | Ghana   | 2490 (1766-2595)          | 3714 (2505-3911)          | 4780 (2908-5119)          |
| 2012 | Ghana   | 2113 (1498-2202)          | 3151 (2125-3319)          | 4056 (2467-4344)          |
| 2013 | Ghana   | 1605 (1138-1678)          | 2394 (1615-2522)          | 3082 (1875-3301)          |
| 2014 | Ghana   | 1360 (964-1447)           | 2028 (1368-2136)          | 2611 (1588-2796)          |
| 2015 | Ghana   | 1257 (891-1310)           | 1875 (1264-1974)          | 2413 (1468-2584)          |
| 2000 | Greece  | 8 (6-9)                   | 12 (8-13)                 | 16 (10-17)                |
| 2001 | Greece  | 7 (5-8)                   | 11 (7-11)                 | 14 (8-15)                 |
| 2002 | Greece  | 6 (4-6)                   | 9 (6-9)                   | 11 (7-12)                 |
| 2003 | Greece  | 8 (6-9)                   | 13 (8-13)                 | 16 (10-17)                |
| 2004 | Greece  | 9 (7-10)                  | 14 (9-15)                 | 18 (11-19)                |
| 2005 | Greece  | 11 (8-12)                 | 17 (11-18)                | 21 (13-23)                |
| 2006 | Greece  | 13 (9-14)                 | 20 (13-21)                | 25 (15-27)                |
| 2007 | Greece  | 12 (8-12)                 | 18 (12-19)                | 23 (14-25)                |
| 2008 | Greece  | 12 (8-12)                 | 18 (12-19)                | 24 (14-25)                |
| 2009 | Greece  | 7 (5-7)                   | 10 (7-11)                 | 14 (8-15)                 |
| 2010 | Greece  | 5 (4-6)                   | 8 (6-9)                   | 11 (7-12)                 |
| 2011 | Greece  | 5 (4-5)                   | 8 (5-8)                   | 11 (6-11)                 |
| 2012 | Greece  | 8 (6-8)                   | 12 (8-13)                 | 16 (10-17)                |
| 2013 | Greece  | 6 (4-6)                   | 9 (6-10)                  | 12 (7-13)                 |
| 2014 | Greece  | 3 (2-3)                   | 5 (3-5)                   | 7 (5-8)                   |
| 2015 | Greece  | 2 (1-2)                   | 4 (2-4)                   | 6 (3-6)                   |

| Year | Country       | Spn pneumonia deaths (UR) | Spn pneumonia deaths (UR) | Spn pneumonia deaths (UR) |
|------|---------------|---------------------------|---------------------------|---------------------------|
| 2000 | Grenada       | 1 (1-1)                   | 2 (1-2)                   | 2 (1-2)                   |
| 2001 | Grenada       | 1 (1-1)                   | 1 (1-2)                   | 2 (1-2)                   |
| 2002 | Grenada       | 1 (1-1)                   | 1 (1-1)                   | 1 (1-1)                   |
| 2003 | Grenada       | 0 (0-0)                   | 0 (0-0)                   | 1 (0-1)                   |
| 2004 | Grenada       | 1 (0-1)                   | 1 (1-1)                   | 1 (1-1)                   |
| 2005 | Grenada       | 1 (1-1)                   | 1 (1-2)                   | 2 (1-2)                   |
| 2006 | Grenada       | 1 (1-2)                   | 2 (1-2)                   | 3 (2-3)                   |
| 2007 | Grenada       | 1 (1-1)                   | 2 (1-2)                   | 2 (1-2)                   |
| 2008 | Grenada       | 1 (0-1)                   | 1 (1-1)                   | 1 (1-1)                   |
| 2009 | Grenada       | 0 (0-0)                   | 0 (0-0)                   | 0 (0-0)                   |
| 2010 | Grenada       | 0 (0-0)                   | 0 (0-0)                   | 0 (0-0)                   |
| 2011 | Grenada       | 0 (0-0)                   | 0 (0-0)                   | 0 (0-0)                   |
| 2012 | Grenada       | 0 (0-0)                   | 1 (0-1)                   | 1 (0-1)                   |
| 2013 | Grenada       | 0 (0-0)                   | 0 (0-1)                   | 1 (0-1)                   |
| 2014 | Grenada       | 0 (0-0)                   | 1 (0-1)                   | 1 (0-1)                   |
| 2015 | Grenada       | 0 (0-0)                   | 0 (0-1)                   | 1 (0-1)                   |
| 2000 | Guatemala     | 1242 (881-1295)           | 1853 (1250-1952)          | 2385 (1451-2555)          |
| 2001 | Guatemala     | 1197 (849-1247)           | 1785 (1204-1880)          | 2298 (1398-2461)          |
| 2002 | Guatemala     | 1151 (816-1199)           | 1717 (1158-1808)          | 2210 (1344-2366)          |
| 2003 | Guatemala     | 1102 (782-1149)           | 1644 (1109-1732)          | 2116 (1288-2267)          |
| 2004 | Guatemala     | 1062 (753-1107)           | 1585 (1069-1669)          | 2039 (1241-2184)          |
| 2005 | Guatemala     | 1021 (724-1064)           | 1523 (1027-1604)          | 1960 (1192-2099)          |
| 2006 | Guatemala     | 977 (693-1018)            | 1457 (983-1535)           | 1876 (1141-2009)          |
| 2007 | Guatemala     | 933 (662-972)             | 1392 (939-1466)           | 1791 (1090-1918)          |
| 2008 | Guatemala     | 882 (625-919)             | 1315 (887-1385)           | 1693 (1030-1813)          |
| 2009 | Guatemala     | 849 (602-888)             | 1266 (854-1334)           | 1630 (992-1746)           |
| 2010 | Guatemala     | 824 (584-859)             | 1229 (829-1294)           | 1582 (962-1694)           |
| 2011 | Guatemala     | 806 (572-840)             | 1202 (811-1266)           | 1547 (941-1657)           |
| 2012 | Guatemala     | 785 (557-818)             | 1171 (790-1234)           | 1507 (917-1615)           |
| 2013 | Guatemala     | 698 (495-727)             | 1041 (702-1097)           | 1340 (815-1435)           |
| 2014 | Guatemala     | 570 (404-594)             | 850 (573-895)             | 1095 (666-1172)           |
| 2015 | Guatemala     | 421 (298-439)             | 628 (423-661)             | 808 (492-865)             |
| 2000 | Guinea        | 2545 (1805-2552)          | 3796 (2560-3998)          | 4885 (2973-5232)          |
| 2001 | Guinea        | 2538 (1800-2645)          | 3786 (2553-3988)          | 4873 (2965-5219)          |
| 2002 | Guinea        | 2515 (1783-2621)          | 3751 (2530-3950)          | 4828 (2937-5171)          |
| 2003 | Guinea        | 2487 (1764-2592)          | 3710 (2502-3907)          | 4775 (2905-5114)          |
| 2004 | Guinea        | 2480 (1759-2585)          | 3700 (2495-3896)          | 4762 (2897-5100)          |
| 2005 | Guinea        | 2476 (1756-2580)          | 3693 (2491-3890)          | 4753 (2892-5091)          |
| 2006 | Guinea        | 2473 (1754-2577)          | 3689 (2488-3885)          | 4748 (2888-5085)          |
| 2007 | Guinea        | 2465 (1748-2569)          | 3677 (2480-3873)          | 4733 (2879-5069)          |
| 2008 | Guinea        | 2368 (1679-2468)          | 3532 (2382-3720)          | 4546 (2765-4869)          |
| 2009 | Guinea        | 2382 (1689-2483)          | 3554 (2396-3743)          | 4574 (2782-4898)          |
| 2010 | Guinea        | 2328 (1651-2426)          | 3473 (2342-3657)          | 4469 (2719-4787)          |
| 2011 | Guinea        | 2280 (1617-2376)          | 3401 (2294-3582)          | 4378 (2663-4689)          |
| 2012 | Guinea        | 2256 (1600-2351)          | 3366 (2270-3545)          | 4332 (2635-4639)          |
| 2013 | Guinea        | 2264 (1605-2359)          | 3377 (2277-3556)          | 4346 (2644-4655)          |
| 2014 | Guinea        | 2268 (1608-2364)          | 3383 (2282-3563)          | 4354 (2649-4664)          |
| 2015 | Guinea        | 2246 (1593-2341)          | 3351 (2260-3529)          | 4313 (2624-4619)          |
| 2000 | Guinea-Bissau | 446 (317-465)             | 666 (449-701)             | 857 (521-918)             |
| 2001 | Guinea-Bissau | 461 (327-480)             | 687 (464-724)             | 885 (538-948)             |
| 2002 | Guinea-Bissau | 471 (334-491)             | 703 (474-741)             | 905 (551-969)             |
| 2003 | Guinea-Bissau | 478 (339-498)             | 713 (481-751)             | 918 (558-983)             |
| 2004 | Guinea-Bissau | 477 (338-497)             | 711 (480-749)             | 916 (557-981)             |
| 2005 | Guinea-Bissau | 469 (332-488)             | 699 (471-736)             | 899 (547-963)             |
| 2006 | Guinea-Bissau | 456 (323-475)             | 680 (458-716)             | 875 (532-937)             |
| 2007 | Guinea-Bissau | 439 (311-458)             | 655 (442-690)             | 843 (513-903)             |
| 2008 | Guinea-Bissau | 420 (298-438)             | 627 (423-660)             | 807 (491-864)             |
| 2009 | Guinea-Bissau | 402 (285-419)             | 600 (404-632)             | 772 (470-827)             |
| 2010 | Guinea-Bissau | 386 (274-403)             | 576 (389-607)             | 741 (451-794)             |
| 2011 | Guinea-Bissau | 371 (263-387)             | 554 (373-583)             | 713 (434-763)             |
| 2012 | Guinea-Bissau | 359 (255-374)             | 535 (361-564)             | 689 (419-738)             |
| 2013 | Guinea-Bissau | 350 (248-365)             | 523 (352-550)             | 673 (409-720)             |
| 2014 | Guinea-Bissau | 343 (243-358)             | 512 (345-539)             | 659 (401-706)             |
| 2015 | Guinea-Bissau | 320 (227-333)             | 477 (322-503)             | 614 (374-658)             |
| 2000 | Guyana        | 21 (15-22)                | 32 (21-33)                | 41 (25-44)                |
| 2001 | Guyana        | 19 (13-19)                | 28 (19-29)                | 36 (22-38)                |
| 2002 | Guyana        | 26 (18-27)                | 38 (26-40)                | 49 (30-53)                |
| 2003 | Guyana        | 18 (13-19)                | 27 (18-29)                | 35 (21-38)                |
| 2004 | Guyana        | 21 (15-22)                | 31 (21-33)                | 40 (24-43)                |
| 2005 | Guyana        | 17 (12-18)                | 25 (17-27)                | 33 (20-35)                |
| 2006 | Guyana        | 17 (12-18)                | 25 (17-27)                | 33 (20-35)                |
| 2007 | Guyana        | 15 (10-15)                | 22 (15-23)                | 28 (17-30)                |
| 2008 | Guyana        | 12 (9-13)                 | 18 (12-19)                | 24 (14-25)                |
| 2009 | Guyana        | 13 (9-14)                 | 19 (13-20)                | 25 (15-27)                |
| 2010 | Guyana        | 12 (8-12)                 | 17 (12-18)                | 22 (14-24)                |
| 2011 | Guyana        | 10 (7-11)                 | 16 (11-17)                | 21 (13-23)                |
| 2012 | Guyana        | 8 (5-8)                   | 12 (8-13)                 | 17 (11-19)                |
| 2013 | Guyana        | 7 (5-7)                   | 12 (8-13)                 | 17 (11-19)                |
| 2014 | Guyana        | 7 (5-7)                   | 11 (8-12)                 | 17 (10-18)                |
| 2015 | Guyana        | 5 (4-5)                   | 9 (6-10)                  | 14 (9-15)                 |
| 2000 | Haiti         | 1883 (1335-1962)          | 2809 (1894-2958)          | 3615 (2199-3872)          |
| 2001 | Haiti         | 1806 (1280-1882)          | 2693 (1816-2836)          | 3466 (2109-3713)          |
| 2002 | Haiti         | 1726 (1224-1799)          | 2575 (1737-2712)          | 3314 (2016-3550)          |
| 2003 | Haiti         | 1648 (1169-1718)          | 2458 (1658-2589)          | 3164 (1925-3389)          |
| 2004 | Haiti         | 1583 (1122-1650)          | 2361 (1592-2487)          | 3039 (1849-3255)          |
| 2005 | Haiti         | 1542 (1093-1607)          | 2300 (1551-2422)          | 2960 (1801-3170)          |
| 2006 | Haiti         | 1514 (1074-1578)          | 2259 (1523-2379)          | 2907 (1768-3113)          |
| 2007 | Haiti         | 1492 (1058-1555)          | 2226 (1501-2344)          | 2865 (1743-3068)          |
| 2008 | Haiti         | 1469 (1042-1531)          | 2191 (1478-2308)          | 2820 (1716-3021)          |
| 2009 | Haiti         | 1442 (1023-1503)          | 2151 (1451-2266)          | 2769 (1684-2965)          |
| 2010 | Haiti         | 5516 (3911-5748)          | 8227 (5548-8665)          | 10589 (6442-11341)        |
| 2011 | Haiti         | 1376 (976-1434)           | 2052 (1384-2161)          | 2641 (1607-2829)          |
| 2012 | Haiti         | 1344 (953-1401)           | 2005 (1352-2111)          | 2580 (1570-2763)          |
| 2013 | Haiti         | 1297 (920-1351)           | 1934 (1304-2037)          | 2490 (1515-2666)          |
| 2014 | Haiti         | 1260 (894-1313)           | 1880 (1268-1980)          | 2420 (1472-2591)          |
| 2015 | Haiti         | 1217 (863-1269)           | 1816 (1224-1912)          | 2337 (1422-2503)          |
| 2000 | Honduras      | 417 (296-435)             | 623 (420-656)             | 801 (487-858)             |
| 2001 | Honduras      | 388 (275-404)             | 579 (390-609)             | 745 (453-798)             |
| 2002 | Honduras      | 350 (248-365)             | 522 (352-550)             | 672 (409-720)             |
| 2003 | Honduras      | 320 (227-334)             | 478 (322-503)             | 615 (374-659)             |
| 2004 | Honduras      | 296 (210-308)             | 441 (297-464)             | 568 (345-608)             |
| 2005 | Honduras      | 280 (198-291)             | 417 (281-439)             | 537 (327-575)             |
| 2006 | Honduras      | 258 (183-268)             | 384 (259-405)             | 494 (301-530)             |
| 2007 | Honduras      | 239 (169-249)             | 356 (240-375)             | 458 (279-491)             |
| 2008 | Honduras      | 223 (158-232)             | 332 (224-350)             | 428 (260-458)             |
| 2009 | Honduras      | 209 (148-218)             | 312 (210-328)             | 401 (244-430)             |
| 2010 | Honduras      | 196 (139-204)             | 292 (197-307)             | 376 (229-402)             |
| 2011 | Honduras      | 137 (97-143)              | 218 (147-230)             | 298 (181-319)             |
| 2012 | Honduras      | 102 (72-106)              | 168 (113-177)             | 239 (145-256)             |

| Year | Country                    | Spn pneumonia deaths (UR) | Spn pneumonia deaths (UR) | Spn pneumonia deaths (UR) |
|------|----------------------------|---------------------------|---------------------------|---------------------------|
| 2013 | Honduras                   | 86 (61-90)                | 145 (98-152)              | 209 (127-224)             |
| 2014 | Honduras                   | 78 (55-81)                | 131 (88-138)              | 191 (116-204)             |
| 2015 | Honduras                   | 53 (38-55)                | 94 (63-99)                | 144 (88-154)              |
| 2000 | Hungary                    | 23 (16-24)                | 35 (23-36)                | 44 (27-48)                |
| 2001 | Hungary                    | 16 (11-16)                | 23 (16-25)                | 30 (18-32)                |
| 2002 | Hungary                    | 10 (7-10)                 | 15 (10-15)                | 19 (11-20)                |
| 2003 | Hungary                    | 16 (12-17)                | 24 (16-25)                | 31 (19-33)                |
| 2004 | Hungary                    | 13 (9-14)                 | 20 (13-21)                | 25 (16-27)                |
| 2005 | Hungary                    | 16 (12-17)                | 24 (16-26)                | 31 (19-33)                |
| 2006 | Hungary                    | 10 (7-11)                 | 16 (11-16)                | 20 (12-22)                |
| 2007 | Hungary                    | 15 (11-16)                | 22 (15-24)                | 29 (18-31)                |
| 2008 | Hungary                    | 8 (6-8)                   | 12 (8-13)                 | 16 (9-17)                 |
| 2009 | Hungary                    | 8 (6-9)                   | 12 (8-13)                 | 16 (10-17)                |
| 2010 | Hungary                    | 9 (6-9)                   | 13 (9-14)                 | 17 (10-18)                |
| 2011 | Hungary                    | 7 (5-8)                   | 12 (8-13)                 | 17 (10-18)                |
| 2012 | Hungary                    | 6 (4-6)                   | 9 (6-10)                  | 14 (8-15)                 |
| 2013 | Hungary                    | 4 (3-4)                   | 7 (5-7)                   | 10 (6-11)                 |
| 2014 | Hungary                    | 4 (3-4)                   | 7 (5-8)                   | 11 (7-12)                 |
| 2015 | Hungary                    | 3 (2-3)                   | 5 (3-5)                   | 8 (5-8)                   |
| 2000 | Iceland                    | 0 (0-0)                   | 0 (0-0)                   | 0 (0-0)                   |
| 2001 | Iceland                    | 0 (0-0)                   | 0 (0-0)                   | 0 (0-0)                   |
| 2002 | Iceland                    | 0 (0-0)                   | 0 (0-0)                   | 0 (0-0)                   |
| 2003 | Iceland                    | 0 (0-0)                   | 0 (0-0)                   | 0 (0-0)                   |
| 2004 | Iceland                    | 0 (0-0)                   | 0 (0-0)                   | 0 (0-0)                   |
| 2005 | Iceland                    | 0 (0-0)                   | 0 (0-0)                   | 0 (0-0)                   |
| 2006 | Iceland                    | 0 (0-0)                   | 0 (0-0)                   | 0 (0-0)                   |
| 2007 | Iceland                    | 0 (0-0)                   | 0 (0-0)                   | 0 (0-0)                   |
| 2008 | Iceland                    | 0 (0-0)                   | 0 (0-0)                   | 0 (0-0)                   |
| 2009 | Iceland                    | 0 (0-0)                   | 0 (0-0)                   | 0 (0-0)                   |
| 2010 | Iceland                    | 0 (0-0)                   | 0 (0-0)                   | 0 (0-0)                   |
| 2011 | Iceland                    | 0 (0-0)                   | 0 (0-0)                   | 0 (0-0)                   |
| 2012 | Iceland                    | 0 (0-0)                   | 0 (0-0)                   | 0 (0-0)                   |
| 2013 | Iceland                    | 0 (0-0)                   | 0 (0-0)                   | 0 (0-0)                   |
| 2014 | Iceland                    | 0 (0-0)                   | 0 (0-0)                   | 0 (0-0)                   |
| 2015 | Iceland                    | 0 (0-0)                   | 0 (0-0)                   | 0 (0-0)                   |
| 2000 | India                      | 135807 (96300-141532)     | 202569 (136608-213340)    | 260714 (158607-279231)    |
| 2001 | India                      | 130030 (92204-135511)     | 193951 (130797-204266)    | 249623 (151860-267353)    |
| 2002 | India                      | 124116 (88010-129348)     | 185131 (124848-194974)    | 238270 (144053-255194)    |
| 2003 | India                      | 118216 (83827-123199)     | 176330 (118914-185706)    | 226944 (138063-243063)    |
| 2004 | India                      | 112017 (79431-116739)     | 167083 (112678-175968)    | 215043 (130823-230317)    |
| 2005 | India                      | 105898 (75092-110362)     | 157956 (106523-166355)    | 203296 (123676-217735)    |
| 2006 | India                      | 100185 (71041-104408)     | 149434 (100776-157380)    | 192328 (117004-205989)    |
| 2007 | India                      | 94169 (66775-98139)       | 140462 (94725-147931)     | 180780 (109979-193621)    |
| 2008 | India                      | 88270 (62592-91991)       | 131663 (88791-138664)     | 169455 (103089-181491)    |
| 2009 | India                      | 82173 (58269-85637)       | 122568 (82658-129086)     | 157750 (95969-168955)     |
| 2010 | India                      | 76701 (54388-79934)       | 114406 (77153-120489)     | 147245 (89577-157703)     |
| 2011 | India                      | 71503 (50702-74517)       | 106653 (71924-112324)     | 137266 (83507-147016)     |
| 2012 | India                      | 65782 (46646-68555)       | 98120 (66170-103337)      | 126284 (76826-135254)     |
| 2013 | India                      | 61383 (43527-63971)       | 91559 (61745-96427)       | 117839 (71688-126209)     |
| 2014 | India                      | 56921 (40362-59320)       | 84902 (57257-89417)       | 109273 (66477-117034)     |
| 2015 | India                      | 53296 (37792-55542)       | 79495 (53610-83722)       | 102314 (62243-109581)     |
| 2000 | Indonesia                  | 12608 (8941-13140)        | 18806 (12683-19806)       | 24205 (14725-25924)       |
| 2001 | Indonesia                  | 11924 (8455-12426)        | 17785 (11994-18731)       | 22890 (13925-24516)       |
| 2002 | Indonesia                  | 11400 (8084-11881)        | 17005 (11468-17909)       | 21886 (13314-23440)       |
| 2003 | Indonesia                  | 10833 (7682-11289)        | 16158 (10897-17017)       | 20796 (12652-22273)       |
| 2004 | Indonesia                  | 10326 (6936-10794)        | 15434 (10314-16337)       | 20116 (12548-21715)       |
| 2005 | Indonesia                  | 9752 (6915-10163)         | 14546 (9809-15319)        | 18721 (11389-20051)       |
| 2006 | Indonesia                  | 9263 (6568-9653)          | 13816 (9317-14551)        | 17782 (10818-19045)       |
| 2007 | Indonesia                  | 8736 (6195-9104)          | 13031 (8788-13724)        | 16771 (10203-17962)       |
| 2008 | Indonesia                  | 8213 (5823-8559)          | 12250 (8261-12901)        | 15766 (9591-16886)        |
| 2009 | Indonesia                  | 7836 (5556-8166)          | 11687 (7882-12309)        | 15042 (9151-16111)        |
| 2010 | Indonesia                  | 7564 (5363-7883)          | 11282 (7608-11882)        | 14521 (8834-15552)        |
| 2011 | Indonesia                  | 7434 (5272-7748)          | 11089 (7478-11679)        | 14272 (8682-15286)        |
| 2012 | Indonesia                  | 7402 (5249-7714)          | 11041 (7446-11628)        | 14210 (8645-15220)        |
| 2013 | Indonesia                  | 7472 (5299-7787)          | 11146 (7516-11738)        | 14345 (8727-15364)        |
| 2014 | Indonesia                  | 7392 (5242-7704)          | 11026 (7436-11612)        | 14191 (8633-15199)        |
| 2015 | Indonesia                  | 7221 (5120-7525)          | 10771 (7264-11343)        | 13862 (8433-14847)        |
| 2000 | Iran (Islamic Republic of) | 1943 (1378-2025)          | 2898 (1955-3052)          | 3730 (2269-3995)          |
| 2001 | Iran (Islamic Republic of) | 1750 (1241-1824)          | 2610 (1760-2749)          | 3360 (2044-3598)          |
| 2002 | Iran (Islamic Republic of) | 1584 (1123-1651)          | 2363 (1594-2489)          | 3041 (1850-3257)          |
| 2003 | Iran (Islamic Republic of) | 1414 (1003-1474)          | 2109 (1423-2222)          | 2715 (1652-2908)          |
| 2004 | Iran (Islamic Republic of) | 1294 (918-1348)           | 1930 (1302-2033)          | 2484 (1511-2660)          |
| 2005 | Iran (Islamic Republic of) | 1186 (841-1236)           | 1769 (1193-1863)          | 2277 (1385-2438)          |
| 2006 | Iran (Islamic Republic of) | 1122 (795-1169)           | 1673 (1128-1762)          | 2154 (1310-2307)          |
| 2007 | Iran (Islamic Republic of) | 1070 (759-1115)           | 1596 (1077-1681)          | 2055 (1250-2200)          |
| 2008 | Iran (Islamic Republic of) | 1029 (730-1073)           | 1535 (1035-1617)          | 1976 (1202-2116)          |
| 2009 | Iran (Islamic Republic of) | 995 (705-1037)            | 1484 (1001-1563)          | 1910 (1162-2045)          |
| 2010 | Iran (Islamic Republic of) | 978 (694-1020)            | 1459 (984-1537)           | 1878 (1143-2012)          |
| 2011 | Iran (Islamic Republic of) | 944 (669-984)             | 1408 (949-1483)           | 1812 (1102-1941)          |
| 2012 | Iran (Islamic Republic of) | 912 (646-950)             | 1360 (917-1432)           | 1750 (1065-1875)          |
| 2013 | Iran (Islamic Republic of) | 885 (628-922)             | 1320 (890-1390)           | 1699 (1034-1820)          |
| 2014 | Iran (Islamic Republic of) | 839 (595-875)             | 1252 (844-1319)           | 1612 (980-1726)           |
| 2015 | Iran (Islamic Republic of) | 790 (560-824)             | 1179 (795-1242)           | 1517 (923-1625)           |
| 2000 | Iraq                       | 1648 (1169-1717)          | 2458 (1658-2589)          | 3164 (1925-3388)          |
| 2001 | Iraq                       | 1638 (1161-1707)          | 2443 (1648-2573)          | 3144 (1913-3368)          |
| 2002 | Iraq                       | 1622 (1150-1691)          | 2420 (1632-2548)          | 3114 (1895-3335)          |
| 2003 | Iraq                       | 1610 (1142-1678)          | 2401 (1619-2529)          | 3091 (1880-3310)          |
| 2004 | Iraq                       | 1601 (1136-1669)          | 2389 (1611-2516)          | 3074 (1870-3293)          |
| 2005 | Iraq                       | 1604 (1137-1673)          | 2392 (1613-2520)          | 3079 (1873-3298)          |
| 2006 | Iraq                       | 1605 (1138-1672)          | 2393 (1614-2521)          | 3080 (1874-3299)          |
| 2007 | Iraq                       | 1628 (1155-1697)          | 2429 (1638-2558)          | 3126 (1902-3348)          |
| 2008 | Iraq                       | 1662 (1178-1732)          | 2478 (1671-2610)          | 3190 (1940-3416)          |
| 2009 | Iraq                       | 1692 (1200-1763)          | 2524 (1702-2658)          | 3248 (1976-3479)          |
| 2010 | Iraq                       | 1707 (1211-1779)          | 2546 (1717-2682)          | 3277 (1994-3510)          |
| 2011 | Iraq                       | 1697 (1203-1769)          | 2531 (1707-2666)          | 3258 (1982-3489)          |
| 2012 | Iraq                       | 1705 (1209-1776)          | 2543 (1715-2678)          | 3272 (1991-3505)          |
| 2013 | Iraq                       | 1708 (1211-1781)          | 2548 (1719-2684)          | 3280 (1995-3513)          |
| 2014 | Iraq                       | 1672 (1186-1743)          | 2494 (1682-2627)          | 3210 (1953-3438)          |
| 2015 | Iraq                       | 1669 (1183-1739)          | 2489 (1678-2621)          | 3203 (1949-3421)          |
| 2000 | Ireland                    | 5 (3-5)                   | 7 (5-8)                   | 9 (6-10)                  |
| 2001 | Ireland                    | 6 (4-7)                   | 9 (6-10)                  | 12 (7-13)                 |
| 2002 | Ireland                    | 1 (1-1)                   | 2 (1-2)                   | 3 (2-3)                   |
| 2003 | Ireland                    | 5 (4-6)                   | 8 (5-8)                   | 10 (6-11)                 |
| 2004 | Ireland                    | 2 (2-2)                   | 3 (2-4)                   | 4 (3-5)                   |
| 2005 | Ireland                    | 5 (3-5)                   | 7 (5-7)                   | 9 (5-10)                  |
| 2006 | Ireland                    | 4 (3-4)                   | 6 (4-6)                   | 7 (4-8)                   |
| 2007 | Ireland                    | 0 (0-0)                   | 0 (0-0)                   | 0 (0-0)                   |
| 2008 | Ireland                    | 1 (1-1)                   | 2 (1-2)                   | 3 (2-3)                   |
| 2009 | Ireland                    | 1 (1-1)                   | 2 (1-2)                   | 2 (1-2)                   |

Spn = Streptococcus pneumoniae; Uncertainty range provided in parentheses.

| Year | Country    | Spn pneumonia deaths (UR) | Spn pneumonia deaths (UR) | Spn pneumonia deaths (UR) |
|------|------------|---------------------------|---------------------------|---------------------------|
| 2010 | Ireland    | 4 (3-4)                   | 6 (4-6)                   | 7 (4-8)                   |
| 2011 | Ireland    | 1 (1-1)                   | 2 (1-2)                   | 3 (2-3)                   |
| 2012 | Ireland    | 1 (1-1)                   | 2 (1-2)                   | 2 (1-2)                   |
| 2013 | Ireland    | 1 (1-1)                   | 1 (1-1)                   | 2 (1-2)                   |
| 2014 | Ireland    | 0 (0-1)                   | 1 (1-1)                   | 1 (1-2)                   |
| 2015 | Ireland    | 0 (0-0)                   | 1 (0-1)                   | 1 (1-1)                   |
| 2000 | Israel     | 4 (3-4)                   | 6 (4-7)                   | 8 (5-9)                   |
| 2001 | Israel     | 5 (4-6)                   | 8 (5-9)                   | 10 (6-11)                 |
| 2002 | Israel     | 7 (5-8)                   | 11 (7-11)                 | 14 (8-15)                 |
| 2003 | Israel     | 2 (2-2)                   | 3 (2-4)                   | 4 (3-5)                   |
| 2004 | Israel     | 10 (7-11)                 | 15 (10-16)                | 20 (12-21)                |
| 2005 | Israel     | 9 (6-9)                   | 13 (9-14)                 | 17 (11-19)                |
| 2006 | Israel     | 3 (2-3)                   | 4 (3-5)                   | 6 (4-6)                   |
| 2007 | Israel     | 5 (3-5)                   | 7 (5-7)                   | 9 (5-9)                   |
| 2008 | Israel     | 8 (6-9)                   | 13 (8-13)                 | 16 (10-17)                |
| 2009 | Israel     | 5 (4-6)                   | 8 (5-8)                   | 10 (6-11)                 |
| 2010 | Israel     | 4 (3-4)                   | 6 (4-6)                   | 7 (4-8)                   |
| 2011 | Israel     | 3 (2-3)                   | 5 (3-5)                   | 7 (4-7)                   |
| 2012 | Israel     | 4 (3-4)                   | 7 (5-7)                   | 10 (6-11)                 |
| 2013 | Israel     | 3 (2-3)                   | 5 (3-5)                   | 7 (4-7)                   |
| 2014 | Israel     | 3 (2-3)                   | 5 (3-5)                   | 7 (4-8)                   |
| 2015 | Israel     | 2 (2-2)                   | 4 (3-4)                   | 6 (4-6)                   |
| 2000 | Italy      | 17 (12-17)                | 25 (17-26)                | 32 (20-34)                |
| 2001 | Italy      | 18 (13-19)                | 27 (18-29)                | 35 (21-38)                |
| 2002 | Italy      | 24 (17-25)                | 36 (24-38)                | 46 (28-49)                |
| 2003 | Italy      | 11 (8-11)                 | 16 (11-17)                | 21 (13-22)                |
| 2004 | Italy      | 13 (10-14)                | 20 (14-21)                | 26 (16-28)                |
| 2005 | Italy      | 14 (10-14)                | 21 (14-22)                | 27 (16-28)                |
| 2006 | Italy      | 12 (8-12)                 | 18 (12-19)                | 23 (14-25)                |
| 2007 | Italy      | 10 (7-10)                 | 14 (10-15)                | 19 (11-20)                |
| 2008 | Italy      | 11 (8-11)                 | 17 (11-18)                | 22 (14-24)                |
| 2009 | Italy      | 6 (4-6)                   | 9 (6-10)                  | 13 (8-14)                 |
| 2010 | Italy      | 7 (5-7)                   | 11 (8-12)                 | 16 (10-17)                |
| 2011 | Italy      | 8 (6-9)                   | 14 (9-14)                 | 20 (12-21)                |
| 2012 | Italy      | 4 (3-4)                   | 7 (5-7)                   | 11 (7-12)                 |
| 2013 | Italy      | 3 (2-3)                   | 5 (4-5)                   | 8 (5-9)                   |
| 2014 | Italy      | 2 (2-3)                   | 5 (3-5)                   | 8 (5-8)                   |
| 2015 | Italy      | 2 (2-2)                   | 4 (3-4)                   | 7 (4-7)                   |
| 2000 | Jamaica    | 13 (9-13)                 | 19 (13-20)                | 25 (15-26)                |
| 2001 | Jamaica    | 12 (8-12)                 | 18 (12-19)                | 23 (14-24)                |
| 2002 | Jamaica    | 11 (8-12)                 | 17 (11-18)                | 22 (13-23)                |
| 2003 | Jamaica    | 11 (8-11)                 | 16 (11-17)                | 21 (13-22)                |
| 2004 | Jamaica    | 12 (8-12)                 | 18 (12-19)                | 23 (14-24)                |
| 2005 | Jamaica    | 13 (9-14)                 | 19 (13-20)                | 25 (15-27)                |
| 2006 | Jamaica    | 14 (10-14)                | 21 (14-22)                | 26 (16-28)                |
| 2007 | Jamaica    | 15 (10-15)                | 22 (15-23)                | 28 (17-30)                |
| 2008 | Jamaica    | 16 (12-17)                | 24 (16-26)                | 31 (19-34)                |
| 2009 | Jamaica    | 15 (11-16)                | 22 (15-24)                | 29 (18-31)                |
| 2010 | Jamaica    | 14 (10-15)                | 21 (14-22)                | 27 (17-29)                |
| 2011 | Jamaica    | 13 (9-14)                 | 20 (13-21)                | 26 (16-28)                |
| 2012 | Jamaica    | 13 (9-14)                 | 19 (13-21)                | 25 (15-27)                |
| 2013 | Jamaica    | 12 (8-12)                 | 17 (12-18)                | 22 (13-24)                |
| 2014 | Jamaica    | 11 (8-11)                 | 16 (11-17)                | 21 (13-23)                |
| 2015 | Jamaica    | 11 (7-11)                 | 16 (11-17)                | 20 (12-22)                |
| 2000 | Japan      | 113 (80-118)              | 169 (114-178)             | 218 (132-233)             |
| 2001 | Japan      | 89 (63-93)                | 133 (90-140)              | 172 (104-184)             |
| 2002 | Japan      | 98 (69-102)               | 146 (98-153)              | 187 (114-201)             |
| 2003 | Japan      | 99 (70-103)               | 147 (99-155)              | 190 (115-203)             |
| 2004 | Japan      | 80 (57-84)                | 120 (81-126)              | 154 (94-165)              |
| 2005 | Japan      | 88 (63-92)                | 132 (89-139)              | 170 (103-182)             |
| 2006 | Japan      | 76 (54-79)                | 113 (76-119)              | 145 (88-155)              |
| 2007 | Japan      | 80 (57-83)                | 119 (80-125)              | 153 (93-164)              |
| 2008 | Japan      | 83 (59-87)                | 124 (84-131)              | 160 (97-171)              |
| 2009 | Japan      | 63 (44-65)                | 94 (63-99)                | 120 (73-129)              |
| 2010 | Japan      | 71 (50-74)                | 106 (71-111)              | 136 (83-146)              |
| 2011 | Japan      | 69 (49-72)                | 102 (69-108)              | 132 (80-141)              |
| 2012 | Japan      | 65 (46-68)                | 97 (66-102)               | 125 (76-134)              |
| 2013 | Japan      | 60 (42-62)                | 89 (60-94)                | 115 (70-123)              |
| 2014 | Japan      | 57 (41-60)                | 86 (58-90)                | 110 (67-118)              |
| 2015 | Japan      | 46 (32-47)                | 75 (50-78)                | 105 (64-112)              |
| 2000 | Jordan     | 126 (89-131)              | 188 (127-198)             | 242 (147-259)             |
| 2001 | Jordan     | 125 (89-131)              | 187 (126-197)             | 241 (146-258)             |
| 2002 | Jordan     | 127 (90-132)              | 189 (127-199)             | 243 (148-260)             |
| 2003 | Jordan     | 121 (86-127)              | 181 (122-191)             | 233 (142-250)             |
| 2004 | Jordan     | 116 (82-121)              | 173 (117-183)             | 223 (136-239)             |
| 2005 | Jordan     | 114 (81-119)              | 171 (115-180)             | 220 (134-235)             |
| 2006 | Jordan     | 113 (80-118)              | 169 (114-178)             | 217 (132-233)             |
| 2007 | Jordan     | 113 (80-118)              | 168 (113-177)             | 217 (132-232)             |
| 2008 | Jordan     | 112 (80-117)              | 167 (113-176)             | 215 (131-231)             |
| 2009 | Jordan     | 113 (80-118)              | 168 (114-177)             | 217 (132-232)             |
| 2010 | Jordan     | 112 (79-116)              | 166 (112-175)             | 214 (130-229)             |
| 2011 | Jordan     | 112 (79-117)              | 167 (113-176)             | 215 (131-230)             |
| 2012 | Jordan     | 112 (79-116)              | 166 (112-175)             | 214 (130-229)             |
| 2013 | Jordan     | 110 (78-115)              | 164 (111-173)             | 212 (129-227)             |
| 2014 | Jordan     | 108 (76-112)              | 161 (108-169)             | 207 (126-222)             |
| 2015 | Jordan     | 104 (74-108)              | 155 (104-163)             | 199 (121-214)             |
| 2000 | Kazakhstan | 499 (354-520)             | 744 (502-784)             | 958 (583-1026)            |
| 2001 | Kazakhstan | 470 (333-490)             | 701 (473-739)             | 903 (549-967)             |
| 2002 | Kazakhstan | 461 (327-480)             | 688 (464-724)             | 885 (538-948)             |
| 2003 | Kazakhstan | 455 (323-474)             | 679 (458-715)             | 873 (531-936)             |
| 2004 | Kazakhstan | 450 (319-469)             | 671 (452-707)             | 864 (525-925)             |
| 2005 | Kazakhstan | 449 (318-468)             | 669 (451-705)             | 862 (524-923)             |
| 2006 | Kazakhstan | 444 (315-463)             | 663 (447-698)             | 853 (519-914)             |
| 2007 | Kazakhstan | 435 (308-453)             | 649 (437-683)             | 835 (508-894)             |
| 2008 | Kazakhstan | 424 (300-442)             | 632 (426-666)             | 813 (495-871)             |
| 2009 | Kazakhstan | 405 (287-422)             | 604 (408-637)             | 778 (473-833)             |
| 2010 | Kazakhstan | 388 (275-404)             | 578 (390-609)             | 744 (453-797)             |
| 2011 | Kazakhstan | 363 (257-378)             | 541 (365-570)             | 696 (424-746)             |
| 2012 | Kazakhstan | 285 (202-297)             | 425 (287-448)             | 547 (333-586)             |
| 2013 | Kazakhstan | 233 (165-243)             | 347 (234-366)             | 447 (272-479)             |
| 2014 | Kazakhstan | 200 (142-209)             | 299 (201-315)             | 384 (234-412)             |
| 2015 | Kazakhstan | 163 (115-170)             | 243 (164-256)             | 312 (190-335)             |
| 2000 | Kenya      | 6300 (4467-6566)          | 9397 (6337-9897)          | 12095 (7358-12954)        |
| 2001 | Kenya      | 6245 (4428-6508)          | 9315 (6282-9810)          | 11989 (7294-12840)        |
| 2002 | Kenya      | 6180 (4382-6440)          | 9218 (6216-9708)          | 11864 (7217-12706)        |
| 2003 | Kenya      | 6061 (4298-6316)          | 9040 (6096-9521)          | 11635 (7078-12461)        |
| 2004 | Kenya      | 5919 (4197-6169)          | 8829 (5954-9299)          | 11363 (6913-12170)        |
| 2005 | Kenya      | 5595 (3967-5831)          | 8345 (5628-8789)          | 10740 (6534-11503)        |
| 2006 | Kenya      | 5451 (3866-5681)          | 8131 (5483-8563)          | 10465 (6367-11208)        |

| Year | Country                          | Spn pneumonia deaths (UR) | Spn pneumonia deaths (UR) | Spn pneumonia deaths (UR) |
|------|----------------------------------|---------------------------|---------------------------|---------------------------|
| 2007 | Kenya                            | 5393 (3824-5621)          | 8045 (5425-8472)          | 10354 (6299-11089)        |
| 2008 | Kenya                            | 5176 (3670-5394)          | 7720 (5206-8131)          | 9936 (6045-10642)         |
| 2009 | Kenya                            | 4954 (3513-5163)          | 7390 (4984-7783)          | 9511 (5786-10186)         |
| 2010 | Kenya                            | 4713 (3342-4911)          | 7029 (4741-7403)          | 9047 (5504-9690)          |
| 2011 | Kenya                            | 3168 (2246-3302)          | 4725 (3187-4977)          | 6082 (3700-6514)          |
| 2012 | Kenya                            | 2665 (1890-2777)          | 3975 (2681-4187)          | 5116 (3112-5480)          |
| 2013 | Kenya                            | 2430 (1723-2532)          | 3624 (2444-3817)          | 4664 (2837-4995)          |
| 2014 | Kenya                            | 2192 (1554-2284)          | 3269 (2205-3443)          | 4208 (2560-4507)          |
| 2015 | Kenya                            | 1548 (1098-1613)          | 2309 (1557-2432)          | 2972 (1808-3183)          |
| 2000 | Kiribati                         | 11 (8-11)                 | 16 (11-17)                | 21 (13-23)                |
| 2001 | Kiribati                         | 10 (7-11)                 | 15 (10-16)                | 20 (12-21)                |
| 2002 | Kiribati                         | 9 (7-10)                  | 14 (10-15)                | 18 (11-19)                |
| 2003 | Kiribati                         | 8 (6-9)                   | 13 (9-13)                 | 16 (10-17)                |
| 2004 | Kiribati                         | 8 (6-8)                   | 12 (8-13)                 | 15 (9-16)                 |
| 2005 | Kiribati                         | 8 (6-9)                   | 12 (8-13)                 | 16 (10-17)                |
| 2006 | Kiribati                         | 9 (6-9)                   | 13 (9-13)                 | 16 (10-18)                |
| 2007 | Kiribati                         | 10 (7-10)                 | 15 (10-15)                | 19 (11-20)                |
| 2008 | Kiribati                         | 11 (8-12)                 | 17 (11-18)                | 22 (13-23)                |
| 2009 | Kiribati                         | 12 (9-13)                 | 19 (13-20)                | 24 (15-26)                |
| 2010 | Kiribati                         | 13 (9-14)                 | 19 (13-20)                | 25 (15-27)                |
| 2011 | Kiribati                         | 13 (9-14)                 | 20 (13-21)                | 26 (16-27)                |
| 2012 | Kiribati                         | 13 (9-13)                 | 19 (13-20)                | 25 (15-26)                |
| 2013 | Kiribati                         | 9 (6-9)                   | 13 (9-14)                 | 17 (10-18)                |
| 2014 | Kiribati                         | 7 (5-7)                   | 11 (7-11)                 | 14 (8-15)                 |
| 2015 | Kiribati                         | 4 (3-4)                   | 6 (4-7)                   | 8 (5-9)                   |
| 2000 | Kuwait                           | 13 (9-14)                 | 19 (13-20)                | 25 (15-27)                |
| 2001 | Kuwait                           | 12 (9-13)                 | 18 (12-19)                | 23 (14-25)                |
| 2002 | Kuwait                           | 12 (9-13)                 | 18 (12-19)                | 23 (14-25)                |
| 2003 | Kuwait                           | 10 (7-11)                 | 16 (10-16)                | 20 (12-21)                |
| 2004 | Kuwait                           | 9 (7-10)                  | 14 (9-15)                 | 18 (11-19)                |
| 2005 | Kuwait                           | 9 (7-10)                  | 14 (9-15)                 | 18 (11-19)                |
| 2006 | Kuwait                           | 8 (6-8)                   | 12 (8-13)                 | 15 (9-16)                 |
| 2007 | Kuwait                           | 14 (10-15)                | 21 (14-22)                | 27 (16-29)                |
| 2008 | Kuwait                           | 9 (6-9)                   | 14 (9-14)                 | 18 (11-19)                |
| 2009 | Kuwait                           | 12 (9-13)                 | 19 (13-20)                | 26 (16-28)                |
| 2010 | Kuwait                           | 13 (9-13)                 | 20 (14-21)                | 28 (17-30)                |
| 2011 | Kuwait                           | 16 (11-17)                | 27 (18-29)                | 39 (24-42)                |
| 2012 | Kuwait                           | 11 (8-12)                 | 20 (13-21)                | 30 (18-32)                |
| 2013 | Kuwait                           | 10 (7-11)                 | 18 (12-19)                | 28 (17-30)                |
| 2014 | Kuwait                           | 10 (7-10)                 | 17 (11-18)                | 26 (16-28)                |
| 2015 | Kuwait                           | 9 (6-10)                  | 16 (11-17)                | 25 (15-26)                |
| 2000 | Kyrgyzstan                       | 158 (112-165)             | 236 (159-248)             | 304 (185-325)             |
| 2001 | Kyrgyzstan                       | 117 (83-122)              | 174 (117-183)             | 224 (136-240)             |
| 2002 | Kyrgyzstan                       | 102 (72-106)              | 152 (103-160)             | 196 (119-210)             |
| 2003 | Kyrgyzstan                       | 93 (66-97)                | 139 (94-146)              | 179 (109-192)             |
| 2004 | Kyrgyzstan                       | 86 (61-90)                | 129 (87-136)              | 166 (101-178)             |
| 2005 | Kyrgyzstan                       | 87 (62-91)                | 130 (87-137)              | 167 (102-179)             |
| 2006 | Kyrgyzstan                       | 82 (58-85)                | 122 (82-128)              | 157 (96-168)              |
| 2007 | Kyrgyzstan                       | 169 (119-176)             | 251 (170-265)             | 323 (197-346)             |
| 2008 | Kyrgyzstan                       | 186 (132-194)             | 278 (188-293)             | 358 (218-383)             |
| 2009 | Kyrgyzstan                       | 191 (135-199)             | 285 (192-300)             | 366 (223-392)             |
| 2010 | Kyrgyzstan                       | 189 (134-197)             | 282 (190-297)             | 363 (221-388)             |
| 2011 | Kyrgyzstan                       | 188 (134-196)             | 281 (190-296)             | 362 (220-387)             |
| 2012 | Kyrgyzstan                       | 185 (131-193)             | 276 (186-291)             | 355 (216-381)             |
| 2013 | Kyrgyzstan                       | 181 (129-189)             | 271 (182-285)             | 348 (212-373)             |
| 2014 | Kyrgyzstan                       | 175 (124-182)             | 261 (176-275)             | 336 (204-359)             |
| 2015 | Kyrgyzstan                       | 164 (116-171)             | 245 (165-258)             | 315 (191-337)             |
| 2000 | Lao People's Democratic Republic | 1206 (855-1257)           | 1799 (1213-1895)          | 2316 (1409-2480)          |
| 2001 | Lao People's Democratic Republic | 1160 (822-1209)           | 1730 (1167-1822)          | 2227 (1355-2385)          |
| 2002 | Lao People's Democratic Republic | 1118 (792-1165)           | 1667 (1124-1756)          | 2145 (1305-2298)          |
| 2003 | Lao People's Democratic Republic | 1083 (768-1129)           | 1616 (1090-1702)          | 2080 (1265-2227)          |
| 2004 | Lao People's Democratic Republic | 1051 (746-1096)           | 1568 (1058-1652)          | 2019 (1228-2162)          |
| 2005 | Lao People's Democratic Republic | 1023 (725-1066)           | 1525 (1029-1606)          | 1963 (1194-2103)          |
| 2006 | Lao People's Democratic Republic | 1000 (709-1043)           | 1492 (1006-1572)          | 1921 (1168-2057)          |
| 2007 | Lao People's Democratic Republic | 976 (692-1017)            | 1455 (961-1533)           | 1873 (1139-2006)          |
| 2008 | Lao People's Democratic Republic | 955 (677-996)             | 1425 (961-1501)           | 1834 (1116-1964)          |
| 2009 | Lao People's Democratic Republic | 928 (658-967)             | 1384 (934-1458)           | 1782 (1084-1908)          |
| 2010 | Lao People's Democratic Republic | 901 (639-939)             | 1344 (907-1416)           | 1730 (1052-1853)          |
| 2011 | Lao People's Democratic Republic | 874 (619-910)             | 1303 (879-1372)           | 1677 (1020-1796)          |
| 2012 | Lao People's Democratic Republic | 835 (592-871)             | 1246 (840-1312)           | 1604 (976-1718)           |
| 2013 | Lao People's Democratic Republic | 790 (560-823)             | 1178 (795-1241)           | 1517 (923-1624)           |
| 2014 | Lao People's Democratic Republic | 502 (356-523)             | 749 (505-789)             | 964 (587-1033)            |
| 2015 | Lao People's Democratic Republic | 403 (286-420)             | 601 (406-633)             | 774 (471-829)             |
| 2000 | Latvia                           | 3 (2-3)                   | 4 (3-4)                   | 5 (3-5)                   |
| 2001 | Latvia                           | 4 (3-4)                   | 6 (4-6)                   | 8 (5-8)                   |
| 2002 | Latvia                           | 2 (1-2)                   | 3 (2-3)                   | 4 (2-4)                   |
| 2003 | Latvia                           | 2 (2-2)                   | 3 (2-3)                   | 4 (3-4)                   |
| 2004 | Latvia                           | 2 (1-2)                   | 3 (2-3)                   | 3 (2-4)                   |
| 2005 | Latvia                           | 4 (3-4)                   | 6 (4-6)                   | 8 (5-8)                   |
| 2006 | Latvia                           | 2 (1-2)                   | 3 (2-3)                   | 3 (2-4)                   |
| 2007 | Latvia                           | 3 (2-3)                   | 4 (3-5)                   | 6 (3-6)                   |
| 2008 | Latvia                           | 0 (0-0)                   | 0 (0-0)                   | 0 (0-0)                   |
| 2009 | Latvia                           | 1 (1-1)                   | 2 (1-2)                   | 3 (2-3)                   |
| 2010 | Latvia                           | 2 (2-2)                   | 3 (2-3)                   | 4 (3-4)                   |
| 2011 | Latvia                           | 1 (1-1)                   | 1 (1-2)                   | 2 (1-2)                   |
| 2012 | Latvia                           | 1 (1-1)                   | 2 (1-2)                   | 2 (1-3)                   |
| 2013 | Latvia                           | 1 (1-1)                   | 1 (1-1)                   | 2 (1-2)                   |
| 2014 | Latvia                           | 1 (0-1)                   | 1 (1-1)                   | 2 (1-2)                   |
| 2015 | Latvia                           | 0 (0-0)                   | 1 (1-1)                   | 1 (1-1)                   |
| 2000 | Lebanon                          | 32 (23-34)                | 48 (33-51)                | 62 (38-67)                |
| 2001 | Lebanon                          | 29 (20-30)                | 43 (29-45)                | 55 (34-59)                |
| 2002 | Lebanon                          | 27 (19-28)                | 40 (27-42)                | 52 (31-55)                |
| 2003 | Lebanon                          | 27 (19-28)                | 40 (27-42)                | 52 (32-55)                |
| 2004 | Lebanon                          | 25 (18-26)                | 37 (25-39)                | 48 (29-52)                |
| 2005 | Lebanon                          | 22 (16-23)                | 33 (22-35)                | 42 (26-45)                |
| 2006 | Lebanon                          | 19 (13-20)                | 28 (19-30)                | 36 (22-39)                |
| 2007 | Lebanon                          | 16 (11-16)                | 23 (16-24)                | 30 (18-32)                |
| 2008 | Lebanon                          | 13 (9-14)                 | 19 (13-20)                | 25 (15-27)                |
| 2009 | Lebanon                          | 11 (8-12)                 | 17 (11-18)                | 22 (13-23)                |
| 2010 | Lebanon                          | 11 (8-11)                 | 16 (11-17)                | 21 (13-22)                |
| 2011 | Lebanon                          | 11 (8-12)                 | 17 (11-18)                | 22 (13-23)                |
| 2012 | Lebanon                          | 12 (9-13)                 | 19 (12-20)                | 24 (15-26)                |
| 2013 | Lebanon                          | 14 (10-14)                | 20 (14-21)                | 26 (16-28)                |
| 2014 | Lebanon                          | 15 (11-15)                | 22 (15-23)                | 28 (17-30)                |
| 2015 | Lebanon                          | 15 (11-16)                | 22 (15-23)                | 29 (17-31)                |
| 2000 | Lesotho                          | 309 (219-322)             | 461 (311-486)             | 594 (361-636)             |
| 2001 | Lesotho                          | 317 (225-331)             | 473 (319-498)             | 609 (371-652)             |
| 2002 | Lesotho                          | 321 (228-335)             | 479 (323-505)             | 617 (375-661)             |
| 2003 | Lesotho                          | 322 (228-335)             | 480 (323-505)             | 617 (376-661)             |



| Year | Country    | Spn pneumonia deaths (UR) | Spn pneumonia deaths (UR) | Spn pneumonia deaths (UR) |
|------|------------|---------------------------|---------------------------|---------------------------|
| 2004 | Lesotho    | 320 (227-334)             | 478 (322-503)             | 615 (374-659)             |
| 2005 | Lesotho    | 320 (227-334)             | 478 (322-503)             | 615 (374-659)             |
| 2006 | Lesotho    | 322 (228-336)             | 481 (324-506)             | 619 (376-662)             |
| 2007 | Lesotho    | 323 (229-337)             | 482 (325-508)             | 620 (377-664)             |
| 2008 | Lesotho    | 326 (231-340)             | 487 (328-513)             | 627 (381-671)             |
| 2009 | Lesotho    | 325 (231-339)             | 485 (327-511)             | 625 (380-669)             |
| 2010 | Lesotho    | 325 (230-338)             | 484 (327-510)             | 624 (379-668)             |
| 2011 | Lesotho    | 326 (231-340)             | 487 (328-513)             | 627 (381-671)             |
| 2012 | Lesotho    | 331 (235-345)             | 493 (333-520)             | 635 (386-680)             |
| 2013 | Lesotho    | 334 (237-348)             | 498 (336-525)             | 641 (390-687)             |
| 2014 | Lesotho    | 334 (237-348)             | 498 (336-524)             | 640 (390-686)             |
| 2015 | Lesotho    | 296 (210-309)             | 442 (298-465)             | 568 (346-609)             |
| 2000 | Uberia     | 842 (597-878)             | 1256 (847-1323)           | 1616 (983-1731)           |
| 2001 | Uberia     | 838 (594-873)             | 1250 (843-1316)           | 1609 (979-1723)           |
| 2002 | Uberia     | 812 (576-846)             | 1211 (817-1275)           | 1558 (948-1669)           |
| 2003 | Uberia     | 776 (550-809)             | 1158 (781-1219)           | 1490 (906-1596)           |
| 2004 | Uberia     | 749 (531-781)             | 1117 (753-1177)           | 1438 (875-1540)           |
| 2005 | Uberia     | 740 (525-772)             | 1104 (745-1163)           | 1421 (865-1522)           |
| 2006 | Uberia     | 736 (522-767)             | 1098 (741-1157)           | 1413 (860-1514)           |
| 2007 | Uberia     | 740 (525-771)             | 1104 (745-1163)           | 1421 (864-1522)           |
| 2008 | Uberia     | 746 (529-778)             | 1113 (751-1172)           | 1432 (871-1534)           |
| 2009 | Uberia     | 743 (527-775)             | 1109 (748-1168)           | 1427 (868-1529)           |
| 2010 | Uberia     | 726 (515-757)             | 1083 (730-1140)           | 1394 (848-1493)           |
| 2011 | Uberia     | 701 (497-731)             | 1046 (706-1102)           | 1347 (819-1442)           |
| 2012 | Uberia     | 677 (480-706)             | 1010 (681-1064)           | 1300 (791-1392)           |
| 2013 | Uberia     | 646 (458-674)             | 964 (650-1015)            | 1241 (755-1329)           |
| 2014 | Uberia     | 520 (369-542)             | 776 (523-817)             | 998 (607-1069)            |
| 2015 | Uberia     | 452 (320-471)             | 674 (454-709)             | 867 (527-928)             |
| 2000 | Ulyba      | 104 (74-108)              | 155 (104-163)             | 199 (121-213)             |
| 2001 | Ulyba      | 99 (70-103)               | 148 (100-156)             | 191 (116-204)             |
| 2002 | Ulyba      | 95 (67-99)                | 142 (96-149)              | 182 (111-195)             |
| 2003 | Ulyba      | 89 (63-93)                | 133 (89-140)              | 171 (104-183)             |
| 2004 | Ulyba      | 83 (59-87)                | 124 (84-131)              | 160 (97-171)              |
| 2005 | Ulyba      | 77 (55-81)                | 115 (78-122)              | 149 (90-159)              |
| 2006 | Ulyba      | 72 (51-75)                | 107 (72-112)              | 137 (84-147)              |
| 2007 | Ulyba      | 72 (51-75)                | 107 (72-113)              | 138 (84-148)              |
| 2008 | Ulyba      | 73 (51-76)                | 108 (73-114)              | 139 (85-149)              |
| 2009 | Ulyba      | 68 (48-70)                | 101 (68-106)              | 130 (79-139)              |
| 2010 | Ulyba      | 64 (45-67)                | 95 (64-100)               | 123 (75-131)              |
| 2011 | Ulyba      | 62 (44-64)                | 92 (62-97)                | 118 (72-127)              |
| 2012 | Ulyba      | 57 (40-59)                | 85 (57-89)                | 109 (66-117)              |
| 2013 | Ulyba      | 52 (37-54)                | 78 (52-82)                | 100 (61-107)              |
| 2014 | Ulyba      | 43 (30-44)                | 65 (44-69)                | 86 (52-92)                |
| 2015 | Ulyba      | 38 (27-40)                | 59 (39-62)                | 78 (47-83)                |
| 2000 | Lithuania  | 10 (7-11)                 | 16 (11-16)                | 20 (12-22)                |
| 2001 | Lithuania  | 7 (5-7)                   | 10 (7-11)                 | 13 (8-14)                 |
| 2002 | Lithuania  | 10 (7-10)                 | 14 (10-15)                | 19 (11-20)                |
| 2003 | Lithuania  | 7 (5-7)                   | 10 (7-11)                 | 13 (8-14)                 |
| 2004 | Lithuania  | 8 (6-9)                   | 12 (8-13)                 | 16 (10-17)                |
| 2005 | Lithuania  | 9 (7-10)                  | 14 (9-15)                 | 18 (11-19)                |
| 2006 | Lithuania  | 7 (5-7)                   | 11 (7-11)                 | 14 (8-15)                 |
| 2007 | Lithuania  | 4 (3-5)                   | 7 (4-7)                   | 9 (5-9)                   |
| 2008 | Lithuania  | 4 (3-4)                   | 5 (4-6)                   | 7 (4-7)                   |
| 2009 | Lithuania  | 8 (6-9)                   | 12 (8-13)                 | 16 (10-17)                |
| 2010 | Lithuania  | 2 (1-2)                   | 3 (2-3)                   | 4 (2-4)                   |
| 2011 | Lithuania  | 1 (1-1)                   | 2 (1-2)                   | 2 (1-2)                   |
| 2012 | Lithuania  | 5 (4-5)                   | 8 (5-8)                   | 10 (6-11)                 |
| 2013 | Lithuania  | 3 (2-3)                   | 4 (3-4)                   | 5 (3-5)                   |
| 2014 | Lithuania  | 3 (2-3)                   | 4 (3-4)                   | 5 (3-5)                   |
| 2015 | Lithuania  | 3 (2-3)                   | 4 (3-4)                   | 5 (3-5)                   |
| 2000 | Luxembourg | 0 (0-0)                   | 0 (0-0)                   | 0 (0-0)                   |
| 2001 | Luxembourg | 0 (0-0)                   | 0 (0-0)                   | 0 (0-0)                   |
| 2002 | Luxembourg | 0 (0-0)                   | 0 (0-0)                   | 0 (0-0)                   |
| 2003 | Luxembourg | 0 (0-0)                   | 0 (0-0)                   | 0 (0-0)                   |
| 2004 | Luxembourg | 0 (0-0)                   | 0 (0-0)                   | 0 (0-0)                   |
| 2005 | Luxembourg | 0 (0-0)                   | 0 (0-0)                   | 0 (0-0)                   |
| 2006 | Luxembourg | 0 (0-0)                   | 0 (0-0)                   | 0 (0-0)                   |
| 2007 | Luxembourg | 0 (0-0)                   | 0 (0-0)                   | 0 (0-0)                   |
| 2008 | Luxembourg | 0 (0-0)                   | 0 (0-0)                   | 0 (0-0)                   |
| 2009 | Luxembourg | 0 (0-0)                   | 0 (0-0)                   | 0 (0-0)                   |
| 2010 | Luxembourg | 0 (0-0)                   | 0 (0-0)                   | 0 (0-0)                   |
| 2011 | Luxembourg | 0 (0-0)                   | 0 (0-0)                   | 0 (0-0)                   |
| 2012 | Luxembourg | 0 (0-0)                   | 0 (0-0)                   | 0 (0-0)                   |
| 2013 | Luxembourg | 0 (0-0)                   | 0 (0-0)                   | 0 (0-0)                   |
| 2014 | Luxembourg | 0 (0-0)                   | 0 (0-0)                   | 0 (0-0)                   |
| 2015 | Luxembourg | 0 (0-0)                   | 0 (0-0)                   | 0 (0-0)                   |
| 2000 | Madagascar | 4461 (3163-4649)          | 6654 (4487-7008)          | 8564 (5210-9172)          |
| 2001 | Madagascar | 4297 (3047-4479)          | 6410 (4323-6751)          | 8250 (5019-8836)          |
| 2002 | Madagascar | 4100 (2907-4273)          | 6116 (4124-6441)          | 7871 (4789-8431)          |
| 2003 | Madagascar | 3892 (2760-4056)          | 5805 (3915-6114)          | 7472 (4545-8002)          |
| 2004 | Madagascar | 3675 (2606-3830)          | 5482 (3697-5774)          | 7056 (4292-7557)          |
| 2005 | Madagascar | 3494 (2477-3641)          | 5211 (3514-5488)          | 6707 (4080-7184)          |
| 2006 | Madagascar | 3312 (2348-3451)          | 4940 (3331-5202)          | 6358 (3868-6809)          |
| 2007 | Madagascar | 3167 (2246-3301)          | 4725 (3186-4976)          | 6081 (3699-6513)          |
| 2008 | Madagascar | 3049 (2162-3178)          | 4548 (3067-4790)          | 5853 (3561-6269)          |
| 2009 | Madagascar | 2964 (2102-3089)          | 4421 (2982-4656)          | 5690 (3462-6094)          |
| 2010 | Madagascar | 2875 (2039-2996)          | 4288 (2892-4516)          | 5519 (3358-5911)          |
| 2011 | Madagascar | 2813 (1995-2923)          | 4196 (2830-4419)          | 5401 (3286-5784)          |
| 2012 | Madagascar | 2754 (1953-2870)          | 4108 (2770-4326)          | 5287 (3216-5663)          |
| 2013 | Madagascar | 1945 (1379-2027)          | 2901 (1956-3055)          | 3734 (2271-3999)          |
| 2014 | Madagascar | 1725 (1223-1797)          | 2573 (1735-2709)          | 3311 (2014-3546)          |
| 2015 | Madagascar | 1590 (1128-1657)          | 2372 (1600-2498)          | 3053 (1857-3270)          |
| 2000 | Malawi     | 4149 (2942-4324)          | 6188 (4173-6517)          | 7964 (4845-8530)          |
| 2001 | Malawi     | 3921 (2780-4086)          | 5848 (3944-6159)          | 7527 (4579-8062)          |
| 2002 | Malawi     | 3606 (2557-3758)          | 5378 (3627-5664)          | 6922 (4211-7414)          |
| 2003 | Malawi     | 3291 (2334-3430)          | 4909 (3310-5170)          | 6318 (3843-6766)          |
| 2004 | Malawi     | 3036 (2153-3164)          | 4529 (3054-4770)          | 5829 (3546-6243)          |
| 2005 | Malawi     | 2835 (2010-2954)          | 4229 (2852-4453)          | 5442 (3311-5829)          |
| 2006 | Malawi     | 2759 (1956-2875)          | 4115 (2775-4334)          | 5296 (3222-5672)          |
| 2007 | Malawi     | 2651 (1880-2763)          | 3955 (2667-4165)          | 5090 (3097-5452)          |
| 2008 | Malawi     | 2569 (1822-2678)          | 3833 (2585-4036)          | 4933 (3001-5283)          |
| 2009 | Malawi     | 2552 (1810-2660)          | 3807 (2567-4009)          | 4899 (2980-5247)          |
| 2010 | Malawi     | 2430 (1723-2532)          | 3624 (2444-3817)          | 4664 (2838-4996)          |
| 2011 | Malawi     | 2508 (1778-2613)          | 3740 (2522-3939)          | 4814 (2929-5156)          |
| 2012 | Malawi     | 1556 (1103-1622)          | 2321 (1565-2444)          | 2987 (1817-3199)          |
| 2013 | Malawi     | 1327 (941-1383)           | 1980 (1335-2085)          | 2548 (1550-2729)          |
| 2014 | Malawi     | 1177 (835-1227)           | 1756 (1184-1849)          | 2260 (1375-2420)          |
| 2015 | Malawi     | 1076 (763-1121)           | 1604 (1082-1690)          | 2065 (1256-2212)          |
| 2000 | Malaysia   | 141 (100-147)             | 210 (142-221)             | 270 (165-290)             |

Spn = Streptococcus pneumoniae; Uncertainty range provided in parentheses.

| Year | Country          | Spn pneumonia deaths (UR) | Spn pneumonia deaths (UR) | Spn pneumonia deaths (UR) |
|------|------------------|---------------------------|---------------------------|---------------------------|
| 2001 | Malaysia         | 122 (86-127)              | 181 (122-191)             | 233 (142-250)             |
| 2002 | Malaysia         | 110 (78-114)              | 164 (110-172)             | 211 (128-226)             |
| 2003 | Malaysia         | 99 (70-103)               | 147 (99-155)              | 189 (115-203)             |
| 2004 | Malaysia         | 99 (70-103)               | 147 (99-155)              | 189 (115-203)             |
| 2005 | Malaysia         | 97 (69-101)               | 145 (97-152)              | 186 (113-199)             |
| 2006 | Malaysia         | 89 (63-93)                | 133 (90-140)              | 172 (104-184)             |
| 2007 | Malaysia         | 80 (57-83)                | 119 (80-126)              | 154 (93-164)              |
| 2008 | Malaysia         | 74 (53-78)                | 111 (75-117)              | 143 (87-153)              |
| 2009 | Malaysia         | 76 (54-79)                | 113 (76-119)              | 145 (88-155)              |
| 2010 | Malaysia         | 75 (53-78)                | 112 (76-118)              | 144 (88-155)              |
| 2011 | Malaysia         | 76 (54-79)                | 113 (76-119)              | 145 (88-156)              |
| 2012 | Malaysia         | 75 (53-78)                | 112 (75-118)              | 144 (88-154)              |
| 2013 | Malaysia         | 73 (52-76)                | 109 (74-115)              | 141 (86-151)              |
| 2014 | Malaysia         | 70 (50-73)                | 105 (71-111)              | 135 (82-145)              |
| 2015 | Malaysia         | 69 (49-72)                | 103 (69-108)              | 132 (81-142)              |
| 2000 | Maldives         | 12 (8-12)                 | 18 (12-19)                | 23 (14-24)                |
| 2001 | Maldives         | 9 (7-10)                  | 14 (10-15)                | 18 (11-19)                |
| 2002 | Maldives         | 7 (5-8)                   | 11 (7-12)                 | 14 (9-15)                 |
| 2003 | Maldives         | 6 (4-6)                   | 9 (6-10)                  | 12 (7-13)                 |
| 2004 | Maldives         | 5 (4-5)                   | 8 (5-8)                   | 10 (6-10)                 |
| 2005 | Maldives         | 4 (3-4)                   | 6 (4-7)                   | 8 (5-9)                   |
| 2006 | Maldives         | 4 (3-4)                   | 6 (4-6)                   | 7 (4-8)                   |
| 2007 | Maldives         | 3 (2-3)                   | 5 (3-5)                   | 6 (4-7)                   |
| 2008 | Maldives         | 3 (2-3)                   | 4 (3-4)                   | 5 (3-6)                   |
| 2009 | Maldives         | 3 (2-3)                   | 4 (3-4)                   | 5 (3-5)                   |
| 2010 | Maldives         | 2 (2-2)                   | 3 (2-3)                   | 4 (3-5)                   |
| 2011 | Maldives         | 2 (1-2)                   | 3 (2-3)                   | 4 (2-4)                   |
| 2012 | Maldives         | 2 (1-2)                   | 3 (2-3)                   | 3 (2-4)                   |
| 2013 | Maldives         | 2 (1-2)                   | 2 (2-3)                   | 3 (2-3)                   |
| 2014 | Maldives         | 2 (1-2)                   | 2 (2-3)                   | 3 (2-3)                   |
| 2015 | Maldives         | 2 (2-2)                   | 2 (2-2)                   | 3 (2-3)                   |
| 2000 | Mali             | 5390 (3822-5617)          | 8040 (5422-8467)          | 10347 (6295-11082)        |
| 2001 | Mali             | 5389 (3822-5616)          | 8039 (5411-8466)          | 10346 (6294-11081)        |
| 2002 | Mali             | 5294 (3754-5517)          | 7896 (5325-8316)          | 10163 (6183-10885)        |
| 2003 | Mali             | 5040 (3574-5253)          | 7518 (5070-7918)          | 9676 (5887-10363)         |
| 2004 | Mali             | 4922 (3490-5130)          | 7342 (4951-7732)          | 9449 (5748-10120)         |
| 2005 | Mali             | 4900 (3474-5106)          | 7309 (4929-7697)          | 9406 (5722-10075)         |
| 2006 | Mali             | 5019 (3559-5231)          | 7487 (5049-7885)          | 9636 (5862-10320)         |
| 2007 | Mali             | 5314 (3768-5538)          | 7927 (5346-8348)          | 10202 (6207-10927)        |
| 2008 | Mali             | 5316 (3770-5540)          | 7929 (5347-8351)          | 10206 (6209-10930)        |
| 2009 | Mali             | 5468 (3877-5698)          | 8156 (5500-8589)          | 10497 (6386-11242)        |
| 2010 | Mali             | 5360 (3801-5586)          | 7995 (5392-8420)          | 10290 (6260-11021)        |
| 2011 | Mali             | 4115 (2918-4289)          | 6138 (4140-6465)          | 7900 (4806-8462)          |
| 2012 | Mali             | 3274 (2322-3412)          | 4884 (3294-5144)          | 6286 (3824-6732)          |
| 2013 | Mali             | 2819 (1999-2938)          | 4205 (2836-4428)          | 5412 (3292-5796)          |
| 2014 | Mali             | 2463 (1746-2566)          | 3673 (2477-3868)          | 4727 (2876-5063)          |
| 2015 | Mali             | 2597 (1841-2706)          | 3873 (2612-4079)          | 4985 (3033-5339)          |
| 2000 | Malta            | 0 (0-0)                   | 0 (0-0)                   | 0 (0-0)                   |
| 2001 | Malta            | 0 (0-0)                   | 0 (0-0)                   | 0 (0-0)                   |
| 2002 | Malta            | 0 (0-0)                   | 0 (0-0)                   | 0 (0-0)                   |
| 2003 | Malta            | 0 (0-0)                   | 0 (0-0)                   | 0 (0-0)                   |
| 2004 | Malta            | 0 (0-0)                   | 1 (0-1)                   | 1 (0-1)                   |
| 2005 | Malta            | 0 (0-0)                   | 1 (0-1)                   | 1 (0-1)                   |
| 2006 | Malta            | 0 (0-0)                   | 1 (0-1)                   | 1 (0-1)                   |
| 2007 | Malta            | 0 (0-0)                   | 0 (0-0)                   | 0 (0-0)                   |
| 2008 | Malta            | 0 (0-0)                   | 0 (0-0)                   | 0 (0-0)                   |
| 2009 | Malta            | 0 (0-0)                   | 0 (0-0)                   | 0 (0-0)                   |
| 2010 | Malta            | 0 (0-0)                   | 0 (0-0)                   | 0 (0-0)                   |
| 2011 | Malta            | 0 (0-0)                   | 0 (0-0)                   | 0 (0-0)                   |
| 2012 | Malta            | 0 (0-0)                   | 0 (0-0)                   | 1 (0-1)                   |
| 2013 | Malta            | 0 (0-0)                   | 1 (0-1)                   | 1 (0-1)                   |
| 2014 | Malta            | 0 (0-0)                   | 0 (0-0)                   | 0 (0-0)                   |
| 2015 | Malta            | 0 (0-0)                   | 0 (0-0)                   | 0 (0-0)                   |
| 2000 | Marshall Islands | 5 (3-5)                   | 7 (5-8)                   | 9 (6-10)                  |
| 2001 | Marshall Islands | 5 (3-5)                   | 7 (5-7)                   | 9 (6-10)                  |
| 2002 | Marshall Islands | 5 (3-5)                   | 7 (5-7)                   | 9 (6-10)                  |
| 2003 | Marshall Islands | 4 (3-5)                   | 7 (5-7)                   | 9 (5-9)                   |
| 2004 | Marshall Islands | 4 (3-5)                   | 7 (4-7)                   | 9 (5-9)                   |
| 2005 | Marshall Islands | 4 (3-4)                   | 6 (4-7)                   | 8 (5-9)                   |
| 2006 | Marshall Islands | 4 (3-4)                   | 6 (4-7)                   | 8 (5-9)                   |
| 2007 | Marshall Islands | 4 (3-4)                   | 6 (4-6)                   | 8 (5-8)                   |
| 2008 | Marshall Islands | 4 (3-4)                   | 6 (4-6)                   | 7 (5-8)                   |
| 2009 | Marshall Islands | 3 (2-3)                   | 5 (3-5)                   | 6 (4-6)                   |
| 2010 | Marshall Islands | 3 (2-3)                   | 5 (3-5)                   | 6 (4-7)                   |
| 2011 | Marshall Islands | 3 (2-3)                   | 4 (3-4)                   | 5 (3-6)                   |
| 2012 | Marshall Islands | 2 (2-3)                   | 4 (2-4)                   | 5 (3-5)                   |
| 2013 | Marshall Islands | 3 (2-3)                   | 4 (3-4)                   | 5 (3-5)                   |
| 2014 | Marshall Islands | 3 (2-3)                   | 4 (3-4)                   | 5 (3-5)                   |
| 2015 | Marshall Islands | 1 (1-1)                   | 1 (1-1)                   | 1 (1-1)                   |
| 2000 | Mauritania       | 631 (447-657)             | 941 (634-991)             | 1211 (737-1297)           |
| 2001 | Mauritania       | 655 (464-682)             | 976 (658-1028)            | 1257 (764-1346)           |
| 2002 | Mauritania       | 679 (481-707)             | 1012 (683-1066)           | 1303 (793-1396)           |
| 2003 | Mauritania       | 698 (495-728)             | 1041 (702-1097)           | 1340 (815-1436)           |
| 2004 | Mauritania       | 711 (504-741)             | 1061 (715-1117)           | 1365 (830-1462)           |
| 2005 | Mauritania       | 719 (510-749)             | 1072 (723-1129)           | 1380 (839-1478)           |
| 2006 | Mauritania       | 723 (513-754)             | 1079 (727-1136)           | 1388 (845-1487)           |
| 2007 | Mauritania       | 724 (513-755)             | 1080 (728-1138)           | 1390 (846-1489)           |
| 2008 | Mauritania       | 720 (510-750)             | 1074 (724-1131)           | 1382 (841-1480)           |
| 2009 | Mauritania       | 712 (505-742)             | 1063 (717-1119)           | 1368 (832-1465)           |
| 2010 | Mauritania       | 707 (502-737)             | 1055 (711-1111)           | 1358 (826-1454)           |
| 2011 | Mauritania       | 704 (500-734)             | 1051 (709-1107)           | 1352 (823-1448)           |
| 2012 | Mauritania       | 693 (491-722)             | 1033 (697-1088)           | 1330 (809-1424)           |
| 2013 | Mauritania       | 682 (483-710)             | 1017 (686-1071)           | 1309 (796-1402)           |
| 2014 | Mauritania       | 494 (351-515)             | 737 (497-777)             | 949 (577-1016)            |
| 2015 | Mauritania       | 427 (303-445)             | 637 (429-670)             | 819 (498-877)             |
| 2000 | Mauritius        | 4 (3-4)                   | 6 (4-6)                   | 8 (5-8)                   |
| 2001 | Mauritius        | 6 (4-6)                   | 8 (6-9)                   | 11 (7-12)                 |
| 2002 | Mauritius        | 4 (3-4)                   | 6 (4-7)                   | 8 (5-9)                   |
| 2003 | Mauritius        | 7 (5-7)                   | 10 (7-10)                 | 13 (8-14)                 |
| 2004 | Mauritius        | 7 (5-7)                   | 11 (7-11)                 | 14 (8-15)                 |
| 2005 | Mauritius        | 5 (3-5)                   | 7 (5-8)                   | 9 (6-10)                  |
| 2006 | Mauritius        | 6 (5-7)                   | 10 (6-10)                 | 12 (7-13)                 |
| 2007 | Mauritius        | 8 (6-9)                   | 12 (8-13)                 | 16 (10-17)                |
| 2008 | Mauritius        | 8 (6-8)                   | 11 (8-12)                 | 14 (9-15)                 |
| 2009 | Mauritius        | 6 (4-6)                   | 9 (6-9)                   | 11 (7-12)                 |
| 2010 | Mauritius        | 6 (4-6)                   | 8 (6-9)                   | 11 (6-11)                 |
| 2011 | Mauritius        | 6 (5-7)                   | 10 (7-10)                 | 12 (8-13)                 |
| 2012 | Mauritius        | 7 (5-7)                   | 10 (7-10)                 | 13 (8-14)                 |
| 2013 | Mauritius        | 8 (6-8)                   | 12 (8-12)                 | 15 (9-16)                 |

| Year | Country                          | Spn pneumonia deaths (UR) | Spn pneumonia deaths (UR) | Spn pneumonia deaths (UR) |
|------|----------------------------------|---------------------------|---------------------------|---------------------------|
| 2014 | Mauritius                        | 6 (5-7)                   | 10 (6-10)                 | 12 (7-13)                 |
| 2015 | Mauritius                        | 6 (5-7)                   | 10 (6-10)                 | 12 (7-13)                 |
| 2000 | Mexico                           | 3758 (2664-3916)          | 5605 (3780-5903)          | 7213 (4388-7726)          |
| 2001 | Mexico                           | 3428 (2431-3572)          | 5113 (3448-5385)          | 6581 (4003-7048)          |
| 2002 | Mexico                           | 3486 (2472-3633)          | 5200 (3507-5476)          | 6692 (4071-7168)          |
| 2003 | Mexico                           | 2933 (2080-3057)          | 4375 (2951-4608)          | 5631 (3426-6031)          |
| 2004 | Mexico                           | 2953 (2094-3077)          | 4404 (2970-4638)          | 5668 (3448-6071)          |
| 2005 | Mexico                           | 2557 (1813-2665)          | 3814 (2572-4016)          | 4908 (2986-5257)          |
| 2006 | Mexico                           | 2428 (1722-2531)          | 3622 (2443-3815)          | 4662 (2836-4993)          |
| 2007 | Mexico                           | 2217 (1572-2310)          | 3307 (2230-3482)          | 4256 (2589-4558)          |
| 2008 | Mexico                           | 2065 (1464-2152)          | 3094 (2087-3259)          | 3999 (2433-4283)          |
| 2009 | Mexico                           | 1859 (1318-1937)          | 2829 (1908-2980)          | 3707 (2255-3971)          |
| 2010 | Mexico                           | 1180 (837-1230)           | 1916 (1292-2018)          | 2672 (1626-2862)          |
| 2011 | Mexico                           | 867 (615-904)             | 1457 (983-1535)           | 2108 (1283-2258)          |
| 2012 | Mexico                           | 652 (462-680)             | 1114 (751-1173)           | 1640 (998-1756)           |
| 2013 | Mexico                           | 651 (461-678)             | 1101 (742-1159)           | 1604 (976-1718)           |
| 2014 | Mexico                           | 611 (433-637)             | 1041 (702-1096)           | 1528 (930-1637)           |
| 2015 | Mexico                           | 583 (413-607)             | 994 (670-1047)            | 1463 (890-1567)           |
| 2000 | Micronesia (Federated States of) | 9 (7-10)                  | 14 (9-15)                 | 18 (11-19)                |
| 2001 | Micronesia (Federated States of) | 9 (6-9)                   | 13 (9-14)                 | 17 (10-18)                |
| 2002 | Micronesia (Federated States of) | 8 (6-9)                   | 12 (8-13)                 | 16 (10-17)                |
| 2003 | Micronesia (Federated States of) | 8 (6-8)                   | 12 (8-13)                 | 15 (9-16)                 |
| 2004 | Micronesia (Federated States of) | 7 (5-8)                   | 11 (7-12)                 | 14 (9-15)                 |
| 2005 | Micronesia (Federated States of) | 7 (5-7)                   | 10 (7-11)                 | 13 (8-14)                 |
| 2006 | Micronesia (Federated States of) | 7 (5-7)                   | 10 (7-10)                 | 12 (8-13)                 |
| 2007 | Micronesia (Federated States of) | 6 (4-6)                   | 9 (6-10)                  | 12 (7-13)                 |
| 2008 | Micronesia (Federated States of) | 6 (4-6)                   | 9 (6-9)                   | 11 (7-12)                 |
| 2009 | Micronesia (Federated States of) | 6 (4-6)                   | 8 (6-9)                   | 11 (6-11)                 |
| 2010 | Micronesia (Federated States of) | 3 (2-3)                   | 4 (3-5)                   | 6 (4-6)                   |
| 2011 | Micronesia (Federated States of) | 3 (2-3)                   | 4 (3-5)                   | 6 (4-6)                   |
| 2012 | Micronesia (Federated States of) | 3 (2-3)                   | 5 (3-5)                   | 6 (4-6)                   |
| 2013 | Micronesia (Federated States of) | 3 (2-3)                   | 4 (3-5)                   | 6 (3-6)                   |
| 2014 | Micronesia (Federated States of) | 3 (2-3)                   | 4 (3-4)                   | 5 (3-5)                   |
| 2015 | Micronesia (Federated States of) | 1 (1-1)                   | 2 (1-2)                   | 2 (1-2)                   |
| 2000 | Monaco                           | 0 (0-0)                   | 0 (0-0)                   | 0 (0-0)                   |
| 2001 | Monaco                           | 0 (0-0)                   | 0 (0-0)                   | 0 (0-0)                   |
| 2002 | Monaco                           | 0 (0-0)                   | 0 (0-0)                   | 0 (0-0)                   |
| 2003 | Monaco                           | 0 (0-0)                   | 0 (0-0)                   | 0 (0-0)                   |
| 2004 | Monaco                           | 0 (0-0)                   | 0 (0-0)                   | 0 (0-0)                   |
| 2005 | Monaco                           | 0 (0-0)                   | 0 (0-0)                   | 0 (0-0)                   |
| 2006 | Monaco                           | 0 (0-0)                   | 0 (0-0)                   | 0 (0-0)                   |
| 2007 | Monaco                           | 0 (0-0)                   | 0 (0-0)                   | 0 (0-0)                   |
| 2008 | Monaco                           | 0 (0-0)                   | 0 (0-0)                   | 0 (0-0)                   |
| 2009 | Monaco                           | 0 (0-0)                   | 0 (0-0)                   | 0 (0-0)                   |
| 2010 | Monaco                           | 0 (0-0)                   | 0 (0-0)                   | 0 (0-0)                   |
| 2011 | Monaco                           | 0 (0-0)                   | 0 (0-0)                   | 0 (0-0)                   |
| 2012 | Monaco                           | 0 (0-0)                   | 0 (0-0)                   | 0 (0-0)                   |
| 2013 | Monaco                           | 0 (0-0)                   | 0 (0-0)                   | 0 (0-0)                   |
| 2014 | Monaco                           | 0 (0-0)                   | 0 (0-0)                   | 0 (0-0)                   |
| 2015 | Monaco                           | 0 (0-0)                   | 0 (0-0)                   | 0 (0-0)                   |
| 2000 | Mongolia                         | 179 (127-186)             | 267 (180-281)             | 343 (209-367)             |
| 2001 | Mongolia                         | 160 (113-166)             | 238 (161-251)             | 307 (187-328)             |
| 2002 | Mongolia                         | 142 (101-148)             | 212 (143-223)             | 273 (166-292)             |
| 2003 | Mongolia                         | 129 (92-135)              | 193 (130-203)             | 249 (151-266)             |
| 2004 | Mongolia                         | 118 (84-123)              | 176 (119-186)             | 227 (138-243)             |
| 2005 | Mongolia                         | 110 (78-115)              | 164 (111-173)             | 212 (129-227)             |
| 2006 | Mongolia                         | 104 (74-109)              | 156 (105-164)             | 200 (122-214)             |
| 2007 | Mongolia                         | 101 (72-105)              | 151 (102-159)             | 194 (118-208)             |
| 2008 | Mongolia                         | 99 (70-103)               | 148 (100-156)             | 190 (116-204)             |
| 2009 | Mongolia                         | 98 (70-103)               | 147 (99-155)              | 189 (115-202)             |
| 2010 | Mongolia                         | 96 (68-100)               | 144 (97-151)              | 185 (113-198)             |
| 2011 | Mongolia                         | 94 (67-98)                | 141 (95-148)              | 181 (110-194)             |
| 2012 | Mongolia                         | 92 (65-96)                | 137 (92-144)              | 176 (107-189)             |
| 2013 | Mongolia                         | 88 (63-92)                | 132 (89-139)              | 169 (103-181)             |
| 2014 | Mongolia                         | 85 (60-88)                | 126 (85-133)              | 163 (99-174)              |
| 2015 | Mongolia                         | 81 (57-84)                | 121 (81-127)              | 155 (95-166)              |
| 2000 | Montenegro                       | 0 (0-0)                   | 0 (0-1)                   | 1 (0-1)                   |
| 2001 | Montenegro                       | 0 (0-0)                   | 0 (0-0)                   | 0 (0-0)                   |
| 2002 | Montenegro                       | 0 (0-0)                   | 0 (0-0)                   | 0 (0-0)                   |
| 2003 | Montenegro                       | 0 (0-0)                   | 0 (0-0)                   | 0 (0-0)                   |
| 2004 | Montenegro                       | 0 (0-0)                   | 0 (0-0)                   | 1 (0-1)                   |
| 2005 | Montenegro                       | 1 (0-1)                   | 1 (1-1)                   | 1 (1-1)                   |
| 2006 | Montenegro                       | 1 (1-1)                   | 2 (1-2)                   | 3 (2-3)                   |
| 2007 | Montenegro                       | 1 (1-1)                   | 2 (1-2)                   | 2 (1-2)                   |
| 2008 | Montenegro                       | 1 (0-1)                   | 1 (1-1)                   | 1 (1-1)                   |
| 2009 | Montenegro                       | 0 (0-0)                   | 0 (0-0)                   | 0 (0-0)                   |
| 2010 | Montenegro                       | 0 (0-0)                   | 0 (0-0)                   | 1 (0-1)                   |
| 2011 | Montenegro                       | 0 (0-0)                   | 1 (0-1)                   | 1 (1-1)                   |
| 2012 | Montenegro                       | 0 (0-0)                   | 1 (0-1)                   | 1 (0-1)                   |
| 2013 | Montenegro                       | 0 (0-0)                   | 0 (0-1)                   | 1 (0-1)                   |
| 2014 | Montenegro                       | 0 (0-0)                   | 0 (0-1)                   | 1 (0-1)                   |
| 2015 | Montenegro                       | 0 (0-0)                   | 0 (0-0)                   | 1 (0-1)                   |
| 2000 | Morocco                          | 1477 (1047-1539)          | 2202 (1485-2320)          | 2835 (1724-3036)          |
| 2001 | Morocco                          | 1356 (961-1413)           | 2022 (1364-2129)          | 2602 (1583-2787)          |
| 2002 | Morocco                          | 1249 (886-1302)           | 1863 (1257-1962)          | 2398 (1459-2569)          |
| 2003 | Morocco                          | 1164 (826-1213)           | 1737 (1171-1829)          | 2235 (1360-2394)          |
| 2004 | Morocco                          | 1095 (776-1141)           | 1633 (1101-1720)          | 2101 (1278-2251)          |
| 2005 | Morocco                          | 1035 (734-1078)           | 1544 (1041-1626)          | 1987 (1209-2128)          |
| 2006 | Morocco                          | 981 (696-1022)            | 1463 (987-1541)           | 1883 (1146-2017)          |
| 2007 | Morocco                          | 940 (667-990)             | 1403 (946-1477)           | 1805 (1098-1934)          |
| 2008 | Morocco                          | 902 (649-940)             | 1345 (907-1417)           | 1732 (1053-1855)          |
| 2009 | Morocco                          | 885 (628-922)             | 1320 (890-1391)           | 1699 (1034-1820)          |
| 2010 | Morocco                          | 862 (611-898)             | 1286 (867-1354)           | 1655 (1007-1773)          |
| 2011 | Morocco                          | 805 (571-839)             | 1200 (810-1264)           | 1545 (940-1655)           |
| 2012 | Morocco                          | 609 (432-635)             | 908 (612-957)             | 1169 (711-1252)           |
| 2013 | Morocco                          | 515 (365-537)             | 769 (518-810)             | 989 (602-1060)            |
| 2014 | Morocco                          | 340 (241-354)             | 507 (342-534)             | 652 (397-699)             |
| 2015 | Morocco                          | 268 (190-279)             | 399 (269-421)             | 514 (313-550)             |
| 2000 | Mozambique                       | 5040 (3574-5252)          | 7517 (5070-7917)          | 9675 (5886-10362)         |
| 2001 | Mozambique                       | 4979 (3531-5189)          | 7427 (5009-7822)          | 9559 (5815-10238)         |
| 2002 | Mozambique                       | 4986 (3535-5196)          | 7436 (5015-7832)          | 9571 (5823-10251)         |
| 2003 | Mozambique                       | 5027 (3565-5239)          | 7498 (5057-7897)          | 9651 (5871-10336)         |
| 2004 | Mozambique                       | 5124 (3633-5340)          | 7643 (5154-8049)          | 9837 (5984-10536)         |
| 2005 | Mozambique                       | 5231 (3709-5451)          | 7802 (5262-8217)          | 10042 (6109-10755)        |
| 2006 | Mozambique                       | 5287 (3749-5509)          | 7885 (5318-8305)          | 10149 (6174-10870)        |
| 2007 | Mozambique                       | 5277 (3742-5499)          | 7871 (5308-8289)          | 10130 (6163-10849)        |
| 2008 | Mozambique                       | 5207 (3693-5427)          | 7767 (5238-8180)          | 9997 (6082-10707)         |
| 2009 | Mozambique                       | 5082 (3604-5297)          | 7581 (5112-7984)          | 9757 (5936-10450)         |
| 2010 | Mozambique                       | 4967 (3522-5176)          | 7408 (4996-7802)          | 9535 (5800-10212)         |

| Year | Country     | Spn pneumonia deaths (UR) | Spn pneumonia deaths (UR) | Spn pneumonia deaths (UR) |
|------|-------------|---------------------------|---------------------------|---------------------------|
| 2011 | Mozambique  | 4844 (3435-5048)          | 7225 (4872-7609)          | 9298 (5657-9959)          |
| 2012 | Mozambique  | 4722 (3348-4921)          | 7043 (4750-7418)          | 9065 (5515-9709)          |
| 2013 | Mozambique  | 3927 (2784-4092)          | 5857 (3950-6168)          | 7538 (4586-8074)          |
| 2014 | Mozambique  | 3190 (2262-3325)          | 4759 (3209-5012)          | 6125 (3726-6560)          |
| 2015 | Mozambique  | 2793 (1980-2910)          | 4165 (2809-4387)          | 5361 (3261-5742)          |
| 2000 | Myanmar     | 4718 (3346-4917)          | 7038 (4746-7412)          | 9058 (5510-9701)          |
| 2001 | Myanmar     | 4648 (3296-4844)          | 6933 (4676-7302)          | 8923 (5429-9557)          |
| 2002 | Myanmar     | 4563 (3236-4756)          | 6807 (4590-7169)          | 8761 (5330-9383)          |
| 2003 | Myanmar     | 4436 (3146-4623)          | 6617 (4462-6969)          | 8516 (5181-9121)          |
| 2004 | Myanmar     | 4265 (3024-4445)          | 6362 (4290-6700)          | 8188 (4981-8769)          |
| 2005 | Myanmar     | 4075 (2890-4247)          | 6078 (4099-6401)          | 7823 (4759-8379)          |
| 2006 | Myanmar     | 3862 (2738-4025)          | 5760 (3885-6066)          | 7414 (4510-7940)          |
| 2007 | Myanmar     | 3619 (2566-3771)          | 5398 (3640-5685)          | 6947 (4226-7440)          |
| 2008 | Myanmar     | 6132 (4348-6390)          | 9146 (6168-9632)          | 11771 (7161-12607)        |
| 2009 | Myanmar     | 3151 (2234-3284)          | 4700 (3170-4950)          | 6049 (3680-6479)          |
| 2010 | Myanmar     | 2949 (2091-3073)          | 4399 (2966-4633)          | 5661 (3444-6064)          |
| 2011 | Myanmar     | 2729 (1935-2844)          | 4070 (2745-4287)          | 5239 (3187-5611)          |
| 2012 | Myanmar     | 2553 (1810-2660)          | 3808 (2568-4010)          | 4901 (2981-5249)          |
| 2013 | Myanmar     | 2419 (1716-2521)          | 3609 (2434-3801)          | 4645 (2826-4974)          |
| 2014 | Myanmar     | 2304 (1634-2401)          | 3437 (2318-3619)          | 4423 (2691-4737)          |
| 2015 | Myanmar     | 2189 (1552-2282)          | 3265 (2202-3439)          | 4203 (2557-4501)          |
| 2000 | Namibia     | 191 (135-199)             | 284 (192-299)             | 366 (223-392)             |
| 2001 | Namibia     | 191 (136-199)             | 285 (192-300)             | 367 (223-393)             |
| 2002 | Namibia     | 191 (135-199)             | 285 (192-300)             | 366 (223-392)             |
| 2003 | Namibia     | 190 (135-198)             | 284 (191-299)             | 365 (222-391)             |
| 2004 | Namibia     | 190 (135-198)             | 283 (191-299)             | 365 (222-391)             |
| 2005 | Namibia     | 191 (135-199)             | 284 (192-299)             | 366 (223-392)             |
| 2006 | Namibia     | 190 (135-198)             | 284 (191-299)             | 365 (222-391)             |
| 2007 | Namibia     | 189 (134-197)             | 282 (190-297)             | 363 (221-389)             |
| 2008 | Namibia     | 190 (134-197)             | 283 (191-298)             | 364 (221-390)             |
| 2009 | Namibia     | 191 (136-199)             | 285 (192-300)             | 367 (223-393)             |
| 2010 | Namibia     | 194 (138-202)             | 289 (195-305)             | 372 (227-399)             |
| 2011 | Namibia     | 197 (140-205)             | 294 (198-309)             | 378 (230-405)             |
| 2012 | Namibia     | 201 (143-210)             | 300 (203-316)             | 387 (235-414)             |
| 2013 | Namibia     | 204 (145-213)             | 304 (205-320)             | 392 (238-419)             |
| 2014 | Namibia     | 206 (146-214)             | 307 (207-323)             | 395 (240-423)             |
| 2015 | Namibia     | 143 (102-149)             | 214 (144-225)             | 275 (167-294)             |
| 2000 | Nauru       | 0 (0-0)                   | 0 (0-0)                   | 1 (0-1)                   |
| 2001 | Nauru       | 0 (0-0)                   | 0 (0-0)                   | 1 (0-1)                   |
| 2002 | Nauru       | 0 (0-0)                   | 0 (0-0)                   | 1 (0-1)                   |
| 2003 | Nauru       | 0 (0-0)                   | 0 (0-1)                   | 1 (0-1)                   |
| 2004 | Nauru       | 0 (0-0)                   | 0 (0-1)                   | 1 (0-1)                   |
| 2005 | Nauru       | 0 (0-0)                   | 0 (0-1)                   | 1 (0-1)                   |
| 2006 | Nauru       | 0 (0-0)                   | 0 (0-1)                   | 1 (0-1)                   |
| 2007 | Nauru       | 0 (0-0)                   | 0 (0-1)                   | 1 (0-1)                   |
| 2008 | Nauru       | 0 (0-0)                   | 0 (0-1)                   | 1 (0-1)                   |
| 2009 | Nauru       | 0 (0-0)                   | 0 (0-0)                   | 0 (0-0)                   |
| 2010 | Nauru       | 0 (0-0)                   | 0 (0-0)                   | 0 (0-0)                   |
| 2011 | Nauru       | 0 (0-0)                   | 0 (0-0)                   | 0 (0-0)                   |
| 2012 | Nauru       | 0 (0-0)                   | 0 (0-0)                   | 0 (0-0)                   |
| 2013 | Nauru       | 0 (0-0)                   | 0 (0-0)                   | 0 (0-0)                   |
| 2014 | Nauru       | 0 (0-0)                   | 0 (0-0)                   | 0 (0-0)                   |
| 2015 | Nauru       | 0 (0-0)                   | 0 (0-0)                   | 0 (0-0)                   |
| 2000 | Nepal       | 3031 (2149-3159)          | 4521 (3049-4761)          | 5819 (3540-6232)          |
| 2001 | Nepal       | 2835 (2011-2955)          | 4229 (2852-4454)          | 5443 (3312-5830)          |
| 2002 | Nepal       | 2607 (1849-2717)          | 3888 (2622-4095)          | 5004 (3044-5360)          |
| 2003 | Nepal       | 2390 (1694-2490)          | 3564 (2404-3754)          | 4587 (2791-4913)          |
| 2004 | Nepal       | 2171 (1540-2263)          | 3239 (2184-3411)          | 4168 (2536-4465)          |
| 2005 | Nepal       | 1984 (1407-2068)          | 2959 (1996-3117)          | 3809 (2317-4079)          |
| 2006 | Nepal       | 1802 (1278-1878)          | 2688 (1813-2831)          | 3460 (2105-3706)          |
| 2007 | Nepal       | 1653 (1172-1723)          | 2466 (1663-2597)          | 3173 (1930-3399)          |
| 2008 | Nepal       | 1509 (1070-1572)          | 2250 (1518-2370)          | 2896 (1762-3102)          |
| 2009 | Nepal       | 1390 (985-1448)           | 2073 (1398-2183)          | 2668 (1623-2857)          |
| 2010 | Nepal       | 1261 (894-1314)           | 1881 (1269-1981)          | 2421 (1473-2593)          |
| 2011 | Nepal       | 1153 (818-1202)           | 1720 (1160-1812)          | 2214 (1347-2371)          |
| 2012 | Nepal       | 1032 (732-1076)           | 1540 (1038-1621)          | 1981 (1205-2122)          |
| 2013 | Nepal       | 941 (668-981)             | 1404 (947-1479)           | 1807 (1099-1936)          |
| 2014 | Nepal       | 869 (616-906)             | 1296 (874-1365)           | 1668 (1015-1786)          |
| 2015 | Nepal       | 691 (490-721)             | 1031 (696-1086)           | 1327 (808-1422)           |
| 2000 | Netherlands | 9 (7-10)                  | 14 (9-15)                 | 18 (11-19)                |
| 2001 | Netherlands | 11 (7-11)                 | 16 (11-17)                | 20 (12-22)                |
| 2002 | Netherlands | 8 (5-8)                   | 11 (8-12)                 | 15 (9-16)                 |
| 2003 | Netherlands | 8 (6-8)                   | 12 (8-13)                 | 15 (9-17)                 |
| 2004 | Netherlands | 8 (6-9)                   | 12 (8-13)                 | 16 (10-17)                |
| 2005 | Netherlands | 10 (7-10)                 | 14 (10-15)                | 19 (11-20)                |
| 2006 | Netherlands | 7 (5-7)                   | 10 (7-11)                 | 13 (8-14)                 |
| 2007 | Netherlands | 6 (4-6)                   | 8 (6-9)                   | 11 (7-11)                 |
| 2008 | Netherlands | 6 (4-6)                   | 8 (6-9)                   | 11 (7-12)                 |
| 2009 | Netherlands | 5 (4-5)                   | 8 (5-8)                   | 11 (7-12)                 |
| 2010 | Netherlands | 4 (3-4)                   | 6 (4-7)                   | 9 (6-10)                  |
| 2011 | Netherlands | 3 (2-3)                   | 5 (3-5)                   | 7 (4-8)                   |
| 2012 | Netherlands | 3 (2-3)                   | 6 (4-6)                   | 8 (5-9)                   |
| 2013 | Netherlands | 2 (1-2)                   | 3 (2-3)                   | 5 (3-5)                   |
| 2014 | Netherlands | 2 (1-2)                   | 3 (2-3)                   | 5 (3-5)                   |
| 2015 | Netherlands | 2 (1-2)                   | 3 (2-3)                   | 5 (3-5)                   |
| 2000 | New Zealand | 9 (6-9)                   | 13 (9-13)                 | 16 (10-18)                |
| 2001 | New Zealand | 4 (3-4)                   | 5 (4-6)                   | 7 (4-8)                   |
| 2002 | New Zealand | 5 (4-6)                   | 8 (5-8)                   | 10 (6-11)                 |
| 2003 | New Zealand | 4 (3-5)                   | 7 (4-7)                   | 8 (5-9)                   |
| 2004 | New Zealand | 13 (9-14)                 | 20 (13-21)                | 25 (15-27)                |
| 2005 | New Zealand | 8 (6-9)                   | 12 (8-13)                 | 16 (10-17)                |
| 2006 | New Zealand | 10 (7-10)                 | 14 (10-15)                | 18 (11-20)                |
| 2007 | New Zealand | 10 (7-11)                 | 15 (10-16)                | 20 (12-21)                |
| 2008 | New Zealand | 8 (6-9)                   | 12 (8-13)                 | 16 (10-17)                |
| 2009 | New Zealand | 6 (4-6)                   | 9 (6-10)                  | 13 (8-14)                 |
| 2010 | New Zealand | 5 (4-5)                   | 8 (5-9)                   | 11 (7-12)                 |
| 2011 | New Zealand | 4 (3-4)                   | 6 (4-6)                   | 8 (5-9)                   |
| 2012 | New Zealand | 3 (2-4)                   | 6 (4-6)                   | 8 (5-9)                   |
| 2013 | New Zealand | 2 (2-2)                   | 4 (3-4)                   | 6 (4-7)                   |
| 2014 | New Zealand | 2 (2-2)                   | 4 (3-4)                   | 6 (4-6)                   |
| 2015 | New Zealand | 2 (2-2)                   | 4 (3-4)                   | 6 (4-6)                   |
| 2000 | Nicaragua   | 351 (249-365)             | 523 (353-551)             | 673 (410-721)             |
| 2001 | Nicaragua   | 329 (233-343)             | 491 (331-517)             | 632 (384-677)             |
| 2002 | Nicaragua   | 300 (213-312)             | 447 (302-471)             | 575 (350-616)             |
| 2003 | Nicaragua   | 273 (194-285)             | 407 (275-429)             | 524 (319-562)             |
| 2004 | Nicaragua   | 260 (185-271)             | 388 (262-409)             | 500 (304-535)             |
| 2005 | Nicaragua   | 246 (175-257)             | 367 (248-387)             | 473 (288-506)             |
| 2006 | Nicaragua   | 239 (169-249)             | 356 (240-375)             | 458 (279-491)             |
| 2007 | Nicaragua   | 233 (165-243)             | 347 (234-366)             | 447 (272-479)             |

| Year | Country   | Spn pneumonia deaths (UR) | Spn pneumonia deaths (UR) | Spn pneumonia deaths (UR) |
|------|-----------|---------------------------|---------------------------|---------------------------|
| 2008 | Nicaragua | 228 (162-238)             | 340 (229-358)             | 438 (266-469)             |
| 2009 | Nicaragua | 220 (156-229)             | 328 (221-345)             | 422 (256-452)             |
| 2010 | Nicaragua | 210 (149-218)             | 313 (211-329)             | 402 (245-431)             |
| 2011 | Nicaragua | 162 (115-169)             | 253 (171-267)             | 341 (207-365)             |
| 2012 | Nicaragua | 113 (80-118)              | 188 (127-198)             | 268 (163-287)             |
| 2013 | Nicaragua | 91 (64-95)                | 154 (104-163)             | 226 (138-242)             |
| 2014 | Nicaragua | 78 (55-81)                | 134 (91-142)              | 200 (122-214)             |
| 2015 | Nicaragua | 57 (40-59)                | 101 (68-107)              | 158 (96-169)              |
| 2000 | Niger     | 8155 (5782-8498)          | 12163 (8203-12810)        | 15655 (9524-16767)        |
| 2001 | Niger     | 8344 (5917-8696)          | 12446 (8394-13108)        | 16019 (9745-17157)        |
| 2002 | Niger     | 8355 (5924-8707)          | 12462 (8404-13124)        | 16039 (9757-17178)        |
| 2003 | Niger     | 8250 (5850-8598)          | 12305 (8299-12960)        | 15838 (9635-16962)        |
| 2004 | Niger     | 8081 (5730-8422)          | 12054 (8129-12695)        | 15514 (9438-16615)        |
| 2005 | Niger     | 7884 (5590-8216)          | 11759 (7930-12384)        | 15135 (9207-16210)        |
| 2006 | Niger     | 7689 (5452-8013)          | 11469 (7734-12079)        | 14761 (8980-15809)        |
| 2007 | Niger     | 7680 (5446-8004)          | 11455 (7725-12064)        | 14743 (8969-15790)        |
| 2008 | Niger     | 7083 (5023-7382)          | 10565 (7125-11127)        | 13598 (8272-14564)        |
| 2009 | Niger     | 6775 (4804-7061)          | 10106 (6815-10643)        | 13007 (7913-13931)        |
| 2010 | Niger     | 6777 (4806-7063)          | 10109 (6817-10646)        | 13010 (7915-13934)        |
| 2011 | Niger     | 6643 (4710-6923)          | 9908 (6682-10435)         | 12753 (7758-13658)        |
| 2012 | Niger     | 6570 (4658-6847)          | 9799 (6608-10320)         | 12612 (7673-13508)        |
| 2013 | Niger     | 6409 (4545-6679)          | 9559 (6447-10068)         | 12303 (7485-13177)        |
| 2014 | Niger     | 6141 (4355-6400)          | 9160 (6178-9647)          | 11790 (7172-12627)        |
| 2015 | Niger     | 4571 (3241-4763)          | 6817 (4598-7180)          | 8774 (5338-9398)          |
| 2000 | Nigeria   | 42934 (30444-44744)       | 64040 (43187-67445)       | 82422 (50142-88276)       |
| 2001 | Nigeria   | 43717 (31000-45560)       | 65208 (43975-68675)       | 83925 (51056-89886)       |
| 2002 | Nigeria   | 44229 (31363-46093)       | 65972 (44490-69479)       | 84908 (51654-90939)       |
| 2003 | Nigeria   | 43777 (31042-45622)       | 65297 (44035-68769)       | 84040 (51126-90009)       |
| 2004 | Nigeria   | 44065 (31247-45923)       | 65727 (44325-69222)       | 84594 (51463-90602)       |
| 2005 | Nigeria   | 44093 (31266-45952)       | 65769 (44353-69266)       | 84647 (51496-90659)       |
| 2006 | Nigeria   | 45173 (32032-47077)       | 67380 (45440-70962)       | 86720 (52757-92880)       |
| 2007 | Nigeria   | 45444 (32224-47360)       | 67784 (45712-71388)       | 87241 (53074-93437)       |
| 2008 | Nigeria   | 45148 (32014-47051)       | 67342 (45414-70923)       | 86672 (52727-92828)       |
| 2009 | Nigeria   | 45719 (32419-47646)       | 68194 (45989-71820)       | 87768 (53394-94002)       |
| 2010 | Nigeria   | 46948 (33291-48927)       | 70027 (47225-73751)       | 90128 (54830-96530)       |
| 2011 | Nigeria   | 47046 (33360-49029)       | 70174 (47324-73905)       | 90316 (54944-96731)       |
| 2012 | Nigeria   | 46006 (32623-47946)       | 68623 (46278-72271)       | 88320 (53730-94593)       |
| 2013 | Nigeria   | 46045 (32651-47986)       | 68681 (46317-72333)       | 88395 (53776-94674)       |
| 2014 | Nigeria   | 45213 (32060-47118)       | 67439 (45479-71025)       | 86796 (52803-92961)       |
| 2015 | Nigeria   | 42386 (30055-44172)       | 63222 (42636-66584)       | 81369 (49501-87148)       |
| 2000 | Niue      | 0 (0-0)                   | 0 (0-0)                   | 0 (0-0)                   |
| 2001 | Niue      | 0 (0-0)                   | 0 (0-0)                   | 0 (0-0)                   |
| 2002 | Niue      | 0 (0-0)                   | 0 (0-0)                   | 0 (0-0)                   |
| 2003 | Niue      | 0 (0-0)                   | 0 (0-0)                   | 0 (0-0)                   |
| 2004 | Niue      | 0 (0-0)                   | 0 (0-0)                   | 0 (0-0)                   |
| 2005 | Niue      | 0 (0-0)                   | 0 (0-0)                   | 0 (0-0)                   |
| 2006 | Niue      | 0 (0-0)                   | 0 (0-0)                   | 0 (0-0)                   |
| 2007 | Niue      | 0 (0-0)                   | 0 (0-0)                   | 0 (0-0)                   |
| 2008 | Niue      | 0 (0-0)                   | 0 (0-0)                   | 0 (0-0)                   |
| 2009 | Niue      | 0 (0-0)                   | 0 (0-0)                   | 0 (0-0)                   |
| 2010 | Niue      | 0 (0-0)                   | 0 (0-0)                   | 0 (0-0)                   |
| 2011 | Niue      | 0 (0-0)                   | 0 (0-0)                   | 0 (0-0)                   |
| 2012 | Niue      | 0 (0-0)                   | 0 (0-0)                   | 0 (0-0)                   |
| 2013 | Niue      | 0 (0-0)                   | 0 (0-0)                   | 0 (0-0)                   |
| 2014 | Niue      | 0 (0-0)                   | 0 (0-0)                   | 0 (0-0)                   |
| 2015 | Niue      | 0 (0-0)                   | 0 (0-0)                   | 0 (0-0)                   |
| 2000 | Norway    | 3 (2-3)                   | 4 (3-4)                   | 5 (3-6)                   |
| 2001 | Norway    | 2 (1-2)                   | 3 (2-3)                   | 3 (2-4)                   |
| 2002 | Norway    | 2 (2-2)                   | 3 (2-3)                   | 4 (3-4)                   |
| 2003 | Norway    | 2 (2-3)                   | 4 (2-4)                   | 5 (3-5)                   |
| 2004 | Norway    | 1 (0-1)                   | 1 (1-1)                   | 1 (1-1)                   |
| 2005 | Norway    | 2 (2-3)                   | 4 (2-4)                   | 5 (3-5)                   |
| 2006 | Norway    | 0 (0-0)                   | 0 (0-0)                   | 0 (0-0)                   |
| 2007 | Norway    | 5 (3-5)                   | 7 (5-7)                   | 9 (5-9)                   |
| 2008 | Norway    | 1 (0-1)                   | 1 (1-1)                   | 1 (1-1)                   |
| 2009 | Norway    | 3 (2-3)                   | 5 (3-5)                   | 6 (4-7)                   |
| 2010 | Norway    | 1 (1-1)                   | 1 (1-1)                   | 2 (1-2)                   |
| 2011 | Norway    | 1 (1-1)                   | 1 (1-1)                   | 2 (1-2)                   |
| 2012 | Norway    | 1 (1-1)                   | 2 (1-2)                   | 2 (1-3)                   |
| 2013 | Norway    | 0 (0-0)                   | 0 (0-0)                   | 0 (0-0)                   |
| 2014 | Norway    | 0 (0-0)                   | 1 (0-1)                   | 1 (1-1)                   |
| 2015 | Norway    | 0 (0-0)                   | 1 (0-1)                   | 1 (1-1)                   |
| 2000 | Oman      | 33 (34-35)                | 50 (34-52)                | 64 (39-68)                |
| 2001 | Oman      | 29 (20-30)                | 43 (29-45)                | 55 (34-59)                |
| 2002 | Oman      | 28 (20-29)                | 42 (28-44)                | 54 (33-58)                |
| 2003 | Oman      | 26 (18-27)                | 39 (26-41)                | 50 (30-54)                |
| 2004 | Oman      | 24 (17-25)                | 36 (24-38)                | 46 (28-49)                |
| 2005 | Oman      | 23 (16-24)                | 34 (23-36)                | 44 (27-47)                |
| 2006 | Oman      | 22 (16-23)                | 33 (22-35)                | 43 (26-46)                |
| 2007 | Oman      | 22 (16-23)                | 34 (23-35)                | 43 (26-46)                |
| 2008 | Oman      | 22 (16-23)                | 33 (23-35)                | 43 (26-46)                |
| 2009 | Oman      | 19 (14-20)                | 30 (20-31)                | 40 (24-42)                |
| 2010 | Oman      | 16 (12-17)                | 26 (18-28)                | 36 (22-39)                |
| 2011 | Oman      | 13 (9-13)                 | 21 (14-22)                | 30 (19-33)                |
| 2012 | Oman      | 12 (8-12)                 | 20 (14-21)                | 30 (18-32)                |
| 2013 | Oman      | 10 (7-11)                 | 18 (12-19)                | 27 (17-29)                |
| 2014 | Oman      | 10 (7-10)                 | 17 (12-18)                | 26 (16-28)                |
| 2015 | Oman      | 10 (7-10)                 | 17 (12-18)                | 27 (16-28)                |
| 2000 | Pakistan  | 23715 (16817-24715)       | 35374 (23855-37255)       | 45527 (27697-48761)       |
| 2001 | Pakistan  | 23339 (16550-24323)       | 34812 (23477-36664)       | 44805 (27257-47987)       |
| 2002 | Pakistan  | 22769 (16146-23729)       | 33962 (22904-35768)       | 43711 (26592-46815)       |
| 2003 | Pakistan  | 22329 (15833-23270)       | 33305 (22461-35076)       | 42865 (26077-45910)       |
| 2004 | Pakistan  | 22049 (15635-22979)       | 32889 (22180-34638)       | 42329 (25751-45336)       |
| 2005 | Pakistan  | 22061 (15643-22991)       | 32906 (22191-34656)       | 42351 (25765-45359)       |
| 2006 | Pakistan  | 22049 (15635-22978)       | 32888 (22179-34637)       | 42328 (25751-45335)       |
| 2007 | Pakistan  | 22201 (15743-23137)       | 33115 (22332-34875)       | 42620 (25928-45647)       |
| 2008 | Pakistan  | 22404 (15887-23349)       | 33418 (22536-35195)       | 43010 (26165-46065)       |
| 2009 | Pakistan  | 22641 (16055-23595)       | 33771 (22775-35567)       | 43465 (26442-46552)       |
| 2010 | Pakistan  | 22655 (16064-23610)       | 33792 (22788-35588)       | 43491 (26458-46580)       |
| 2011 | Pakistan  | 22691 (16090-23647)       | 33845 (22825-35645)       | 43560 (26500-46654)       |
| 2012 | Pakistan  | 22356 (15853-23298)       | 33346 (22488-35119)       | 42918 (26109-45966)       |
| 2013 | Pakistan  | 15577 (11045-16233)       | 23234 (15668-24469)       | 29903 (18192-32027)       |
| 2014 | Pakistan  | 13020 (9232-13568)        | 19420 (13096-20452)       | 24994 (15205-26769)       |
| 2015 | Pakistan  | 12361 (8765-12882)        | 18437 (12434-19418)       | 23730 (14436-25415)       |
| 2000 | Palau     | 0 (0-0)                   | 0 (0-0)                   | 0 (0-0)                   |
| 2001 | Palau     | 0 (0-0)                   | 0 (0-0)                   | 0 (0-0)                   |
| 2002 | Palau     | 0 (0-0)                   | 0 (0-0)                   | 1 (0-1)                   |
| 2003 | Palau     | 0 (0-0)                   | 0 (0-0)                   | 0 (0-0)                   |
| 2004 | Palau     | 0 (0-0)                   | 0 (0-0)                   | 1 (0-1)                   |

| Year | Country          | Spn pneumonia deaths (UR) | Spn pneumonia deaths (UR) | Spn pneumonia deaths (UR) |
|------|------------------|---------------------------|---------------------------|---------------------------|
| 2005 | Palau            | 0 (0-0)                   | 0 (0-0)                   | 1 (0-1)                   |
| 2006 | Palau            | 0 (0-0)                   | 0 (0-0)                   | 1 (0-1)                   |
| 2007 | Palau            | 0 (0-0)                   | 0 (0-0)                   | 0 (0-0)                   |
| 2008 | Palau            | 0 (0-0)                   | 0 (0-0)                   | 0 (0-0)                   |
| 2009 | Palau            | 0 (0-0)                   | 0 (0-0)                   | 0 (0-0)                   |
| 2010 | Palau            | 0 (0-0)                   | 0 (0-0)                   | 0 (0-0)                   |
| 2011 | Palau            | 0 (0-0)                   | 0 (0-0)                   | 0 (0-0)                   |
| 2012 | Palau            | 0 (0-0)                   | 0 (0-0)                   | 0 (0-0)                   |
| 2013 | Palau            | 0 (0-0)                   | 0 (0-0)                   | 0 (0-0)                   |
| 2014 | Palau            | 0 (0-0)                   | 0 (0-0)                   | 0 (0-0)                   |
| 2015 | Palau            | 0 (0-0)                   | 0 (0-0)                   | 0 (0-0)                   |
| 2000 | Panama           | 38 (27-40)                | 57 (38-60)                | 73 (44-78)                |
| 2001 | Panama           | 43 (31-45)                | 65 (44-68)                | 83 (51-89)                |
| 2002 | Panama           | 40 (28-41)                | 59 (40-62)                | 76 (46-82)                |
| 2003 | Panama           | 43 (31-45)                | 65 (44-68)                | 83 (51-89)                |
| 2004 | Panama           | 45 (32-46)                | 66 (45-70)                | 86 (52-92)                |
| 2005 | Panama           | 55 (39-58)                | 83 (56-87)                | 107 (65-114)              |
| 2006 | Panama           | 53 (38-55)                | 79 (53-84)                | 102 (62-109)              |
| 2007 | Panama           | 63 (45-66)                | 94 (64-100)               | 122 (74-130)              |
| 2008 | Panama           | 68 (48-71)                | 101 (68-107)              | 131 (79-140)              |
| 2009 | Panama           | 44 (31-46)                | 65 (44-69)                | 84 (51-90)                |
| 2010 | Panama           | 73 (52-76)                | 111 (75-117)              | 145 (88-155)              |
| 2011 | Panama           | 59 (42-62)                | 92 (62-96)                | 122 (74-131)              |
| 2012 | Panama           | 45 (32-47)                | 71 (48-75)                | 97 (59-104)               |
| 2013 | Panama           | 43 (31-45)                | 70 (47-74)                | 98 (59-105)               |
| 2014 | Panama           | 28 (20-29)                | 48 (32-50)                | 72 (44-77)                |
| 2015 | Panama           | 21 (15-22)                | 37 (25-39)                | 58 (35-62)                |
| 2000 | Papua New Guinea | 859 (609-895)             | 1281 (864-1349)           | 1648 (1003-1765)          |
| 2001 | Papua New Guinea | 875 (621-912)             | 1306 (880-1375)           | 1680 (1022-1800)          |
| 2002 | Papua New Guinea | 884 (627-921)             | 1318 (889-1388)           | 1697 (1032-1817)          |
| 2003 | Papua New Guinea | 886 (628-923)             | 1321 (891-1392)           | 1701 (1035-1821)          |
| 2004 | Papua New Guinea | 889 (631-927)             | 1326 (894-1397)           | 1707 (1039-1828)          |
| 2005 | Papua New Guinea | 891 (632-929)             | 1329 (896-1400)           | 1711 (1041-1832)          |
| 2006 | Papua New Guinea | 890 (631-928)             | 1328 (895-1398)           | 1709 (1039-1830)          |
| 2007 | Papua New Guinea | 891 (631-928)             | 1328 (896-1399)           | 1710 (1040-1831)          |
| 2008 | Papua New Guinea | 883 (626-920)             | 1317 (888-1388)           | 1696 (1032-1816)          |
| 2009 | Papua New Guinea | 878 (623-915)             | 1310 (883-1379)           | 1686 (1026-1806)          |
| 2010 | Papua New Guinea | 864 (613-900)             | 1288 (869-1357)           | 1658 (1009-1776)          |
| 2011 | Papua New Guinea | 849 (602-885)             | 1267 (854-1334)           | 1631 (992-1746)           |
| 2012 | Papua New Guinea | 832 (590-867)             | 1240 (836-1306)           | 1596 (971-1710)           |
| 2013 | Papua New Guinea | 817 (579-852)             | 1219 (822-1284)           | 1569 (954-1680)           |
| 2014 | Papua New Guinea | 794 (563-828)             | 1184 (799-1247)           | 1524 (927-1633)           |
| 2015 | Papua New Guinea | 671 (475-699)             | 1000 (674-1053)           | 1287 (783-1379)           |
| 2000 | Paraguay         | 204 (145-212)             | 304 (205-320)             | 391 (238-419)             |
| 2001 | Paraguay         | 195 (138-203)             | 290 (196-306)             | 373 (227-400)             |
| 2002 | Paraguay         | 182 (129-190)             | 272 (184-287)             | 350 (213-375)             |
| 2003 | Paraguay         | 188 (134-196)             | 281 (190-296)             | 362 (220-387)             |
| 2004 | Paraguay         | 182 (129-189)             | 271 (183-285)             | 349 (212-374)             |
| 2005 | Paraguay         | 172 (122-179)             | 256 (173-270)             | 330 (201-353)             |
| 2006 | Paraguay         | 165 (117-172)             | 246 (166-259)             | 316 (192-339)             |
| 2007 | Paraguay         | 158 (112-164)             | 235 (159-248)             | 303 (184-324)             |
| 2008 | Paraguay         | 153 (109-160)             | 229 (154-241)             | 294 (179-315)             |
| 2009 | Paraguay         | 146 (104-153)             | 218 (147-230)             | 281 (171-301)             |
| 2010 | Paraguay         | 141 (100-147)             | 210 (142-221)             | 270 (165-290)             |
| 2011 | Paraguay         | 134 (95-140)              | 200 (135-210)             | 257 (156-275)             |
| 2012 | Paraguay         | 97 (68-101)               | 153 (103-162)             | 209 (127-224)             |
| 2013 | Paraguay         | 76 (54-79)                | 125 (84-131)              | 176 (107-189)             |
| 2014 | Paraguay         | 66 (47-69)                | 111 (75-116)              | 158 (96-170)              |
| 2015 | Paraguay         | 59 (42-61)                | 99 (67-104)               | 144 (88-154)              |
| 2000 | Peru             | 1417 (1005-1476)          | 2113 (1425-2226)          | 2720 (1655-2913)          |
| 2001 | Peru             | 1227 (870-1279)           | 1830 (1234-1927)          | 2355 (1433-2523)          |
| 2002 | Peru             | 1097 (778-1143)           | 1637 (1104-1724)          | 2106 (1281-2256)          |
| 2003 | Peru             | 972 (689-1013)            | 1450 (978-1527)           | 1866 (1135-1998)          |
| 2004 | Peru             | 873 (619-910)             | 1303 (878-1372)           | 1677 (1020-1796)          |
| 2005 | Peru             | 786 (557-819)             | 1172 (790-1234)           | 1508 (917-1615)           |
| 2006 | Peru             | 729 (517-760)             | 1088 (734-1146)           | 1400 (852-1500)           |
| 2007 | Peru             | 670 (475-698)             | 999 (674-1052)            | 1286 (782-1377)           |
| 2008 | Peru             | 615 (436-641)             | 918 (619-967)             | 1181 (719-1265)           |
| 2009 | Peru             | 554 (393-578)             | 829 (559-874)             | 1070 (651-1146)           |
| 2010 | Peru             | 446 (316-465)             | 690 (465-726)             | 917 (558-982)             |
| 2011 | Peru             | 373 (265-389)             | 590 (398-621)             | 801 (487-858)             |
| 2012 | Peru             | 286 (203-298)             | 469 (316-494)             | 661 (402-708)             |
| 2013 | Peru             | 196 (139-205)             | 339 (229-357)             | 507 (308-543)             |
| 2014 | Peru             | 157 (112-164)             | 278 (187-292)             | 424 (258-454)             |
| 2015 | Peru             | 140 (99-146)              | 249 (168-262)             | 385 (234-412)             |
| 2000 | Philippines      | 5040 (3574-5253)          | 7518 (5070-7917)          | 9676 (5886-10363)         |
| 2001 | Philippines      | 4978 (3530-5188)          | 7425 (5007-7820)          | 9556 (5813-10235)         |
| 2002 | Philippines      | 4899 (3474-5106)          | 7308 (4928-7697)          | 9406 (5722-10074)         |
| 2003 | Philippines      | 4838 (3431-5042)          | 7217 (4867-7600)          | 9288 (5650-9948)          |
| 2004 | Philippines      | 4753 (3371-4954)          | 7090 (4781-7467)          | 9125 (5551-9773)          |
| 2005 | Philippines      | 4528 (3211-4718)          | 6753 (4554-7112)          | 8692 (5288-9309)          |
| 2006 | Philippines      | 4482 (3178-4671)          | 6685 (4508-7040)          | 8604 (5234-9215)          |
| 2007 | Philippines      | 4341 (3078-4524)          | 6475 (4367-6819)          | 8333 (5070-8925)          |
| 2008 | Philippines      | 4193 (2973-4370)          | 6254 (4218-6587)          | 8050 (4897-8621)          |
| 2009 | Philippines      | 4043 (2867-4214)          | 6031 (4067-6352)          | 7762 (4722-8313)          |
| 2010 | Philippines      | 3917 (2778-4082)          | 5843 (3940-6153)          | 7520 (4575-8054)          |
| 2011 | Philippines      | 3848 (2728-4011)          | 5740 (3871-6046)          | 7388 (4495-7913)          |
| 2012 | Philippines      | 3771 (2674-3930)          | 5625 (3793-5924)          | 7240 (4404-7754)          |
| 2013 | Philippines      | 3743 (2654-3901)          | 5583 (3765-5880)          | 7186 (4371-7696)          |
| 2014 | Philippines      | 3096 (2195-3226)          | 4618 (3114-4863)          | 5943 (3616-6365)          |
| 2015 | Philippines      | 3182 (2256-3316)          | 4746 (3200-4998)          | 6108 (3716-6541)          |
| 2000 | Poland           | 47 (33-49)                | 70 (47-74)                | 91 (65-97)                |
| 2001 | Poland           | 39 (27-40)                | 58 (39-61)                | 74 (45-80)                |
| 2002 | Poland           | 29 (21-30)                | 44 (29-46)                | 56 (34-60)                |
| 2003 | Poland           | 34 (24-35)                | 50 (34-53)                | 65 (39-69)                |
| 2004 | Poland           | 35 (25-37)                | 53 (36-56)                | 68 (41-73)                |
| 2005 | Poland           | 36 (26-38)                | 54 (36-57)                | 69 (42-74)                |
| 2006 | Poland           | 39 (27-40)                | 57 (39-60)                | 74 (45-79)                |
| 2007 | Poland           | 43 (31-45)                | 65 (44-68)                | 83 (51-89)                |
| 2008 | Poland           | 40 (28-41)                | 59 (40-62)                | 76 (46-81)                |
| 2009 | Poland           | 45 (32-47)                | 68 (46-71)                | 87 (53-93)                |
| 2010 | Poland           | 38 (27-40)                | 57 (39-60)                | 74 (45-79)                |
| 2011 | Poland           | 30 (21-31)                | 45 (30-47)                | 58 (35-62)                |
| 2012 | Poland           | 30 (21-32)                | 45 (30-48)                | 58 (35-62)                |
| 2013 | Poland           | 40 (28-41)                | 59 (40-63)                | 76 (46-82)                |
| 2014 | Poland           | 31 (22-32)                | 46 (31-48)                | 59 (36-63)                |
| 2015 | Poland           | 31 (22-32)                | 46 (31-49)                | 60 (36-64)                |
| 2000 | Portugal         | 10 (7-11)                 | 15 (10-16)                | 19 (12-21)                |
| 2001 | Portugal         | 10 (7-11)                 | 15 (10-16)                | 20 (12-21)                |

Spn = Streptococcus pneumoniae; Uncertainty range provided in parentheses.

| Year | Country             | Spn pneumonia deaths (UR) | Spn pneumonia deaths (UR) | Spn pneumonia deaths (UR) |
|------|---------------------|---------------------------|---------------------------|---------------------------|
| 2002 | Portugal            | 11 (7-11)                 | 16 (11-17)                | 21 (13-22)                |
| 2003 | Portugal            | 9 (7-10)                  | 14 (10-15)                | 19 (12-20)                |
| 2004 | Portugal            | 6 (4-7)                   | 10 (7-10)                 | 13 (8-14)                 |
| 2005 | Portugal            | 5 (4-6)                   | 8 (6-9)                   | 12 (7-12)                 |
| 2006 | Portugal            | 5 (4-5)                   | 8 (5-8)                   | 10 (6-11)                 |
| 2007 | Portugal            | 3 (2-3)                   | 5 (3-5)                   | 6 (4-7)                   |
| 2008 | Portugal            | 4 (3-4)                   | 6 (4-6)                   | 8 (5-8)                   |
| 2009 | Portugal            | 7 (5-7)                   | 10 (7-11)                 | 13 (8-14)                 |
| 2010 | Portugal            | 1 (1-1)                   | 2 (1-2)                   | 3 (2-3)                   |
| 2011 | Portugal            | 3 (2-3)                   | 4 (3-4)                   | 6 (4-6)                   |
| 2012 | Portugal            | 1 (0-1)                   | 1 (1-1)                   | 2 (1-2)                   |
| 2013 | Portugal            | 1 (1-1)                   | 2 (1-2)                   | 3 (2-3)                   |
| 2014 | Portugal            | 1 (1-1)                   | 1 (1-1)                   | 2 (1-2)                   |
| 2015 | Portugal            | 0 (0-1)                   | 1 (1-1)                   | 1 (1-2)                   |
| 2000 | Qatar               | 3 (2-3)                   | 5 (3-5)                   | 6 (4-6)                   |
| 2001 | Qatar               | 3 (2-3)                   | 4 (3-5)                   | 6 (3-6)                   |
| 2002 | Qatar               | 3 (2-3)                   | 4 (3-4)                   | 5 (3-5)                   |
| 2003 | Qatar               | 3 (2-3)                   | 4 (3-4)                   | 5 (3-5)                   |
| 2004 | Qatar               | 3 (2-3)                   | 4 (3-4)                   | 5 (3-5)                   |
| 2005 | Qatar               | 3 (2-3)                   | 4 (3-4)                   | 5 (3-5)                   |
| 2006 | Qatar               | 2 (2-3)                   | 4 (3-4)                   | 5 (3-5)                   |
| 2007 | Qatar               | 2 (2-3)                   | 4 (2-4)                   | 5 (3-5)                   |
| 2008 | Qatar               | 3 (2-3)                   | 4 (3-4)                   | 5 (3-5)                   |
| 2009 | Qatar               | 2 (2-2)                   | 3 (2-4)                   | 5 (3-5)                   |
| 2010 | Qatar               | 2 (2-2)                   | 3 (2-4)                   | 5 (3-5)                   |
| 2011 | Qatar               | 2 (1-2)                   | 3 (2-3)                   | 4 (3-5)                   |
| 2012 | Qatar               | 2 (1-2)                   | 3 (2-3)                   | 4 (3-5)                   |
| 2013 | Qatar               | 2 (1-2)                   | 3 (2-3)                   | 4 (2-4)                   |
| 2014 | Qatar               | 1 (1-1)                   | 3 (2-3)                   | 4 (2-4)                   |
| 2015 | Qatar               | 1 (1-2)                   | 3 (2-3)                   | 4 (2-4)                   |
| 2000 | Republic of Korea   | 56 (40-58)                | 84 (56-88)                | 108 (66-115)              |
| 2001 | Republic of Korea   | 49 (25-51)                | 73 (49-77)                | 94 (57-101)               |
| 2002 | Republic of Korea   | 44 (21-46)                | 66 (45-70)                | 85 (52-91)                |
| 2003 | Republic of Korea   | 36 (26-37)                | 54 (36-57)                | 69 (42-74)                |
| 2004 | Republic of Korea   | 25 (18-27)                | 38 (26-40)                | 49 (30-52)                |
| 2005 | Republic of Korea   | 23 (17-24)                | 35 (24-37)                | 45 (27-48)                |
| 2006 | Republic of Korea   | 27 (19-28)                | 40 (27-42)                | 51 (31-55)                |
| 2007 | Republic of Korea   | 20 (14-21)                | 30 (21-32)                | 39 (24-42)                |
| 2008 | Republic of Korea   | 20 (14-21)                | 30 (20-32)                | 39 (23-41)                |
| 2009 | Republic of Korea   | 21 (15-21)                | 31 (21-32)                | 39 (24-42)                |
| 2010 | Republic of Korea   | 19 (14-20)                | 29 (19-30)                | 37 (22-39)                |
| 2011 | Republic of Korea   | 19 (13-20)                | 28 (19-30)                | 36 (22-39)                |
| 2012 | Republic of Korea   | 13 (9-13)                 | 19 (13-20)                | 24 (15-26)                |
| 2013 | Republic of Korea   | 14 (10-15)                | 22 (15-23)                | 28 (17-30)                |
| 2014 | Republic of Korea   | 16 (12-17)                | 25 (17-26)                | 32 (19-34)                |
| 2015 | Republic of Korea   | 10 (7-11)                 | 17 (12-18)                | 24 (15-26)                |
| 2000 | Republic of Moldova | 60 (43-63)                | 90 (60-94)                | 115 (70-124)              |
| 2001 | Republic of Moldova | 49 (35-51)                | 73 (49-77)                | 94 (57-101)               |
| 2002 | Republic of Moldova | 36 (25-37)                | 54 (36-56)                | 69 (42-74)                |
| 2003 | Republic of Moldova | 33 (23-34)                | 49 (33-51)                | 63 (38-67)                |
| 2004 | Republic of Moldova | 24 (17-25)                | 36 (24-38)                | 46 (28-50)                |
| 2005 | Republic of Moldova | 22 (16-23)                | 33 (23-35)                | 43 (26-46)                |
| 2006 | Republic of Moldova | 24 (17-25)                | 36 (24-38)                | 47 (28-50)                |
| 2007 | Republic of Moldova | 18 (13-19)                | 27 (18-29)                | 35 (21-37)                |
| 2008 | Republic of Moldova | 19 (13-20)                | 28 (19-30)                | 37 (22-39)                |
| 2009 | Republic of Moldova | 20 (14-20)                | 29 (20-31)                | 38 (23-40)                |
| 2010 | Republic of Moldova | 20 (14-21)                | 30 (20-32)                | 39 (24-42)                |
| 2011 | Republic of Moldova | 20 (14-21)                | 30 (20-31)                | 38 (23-41)                |
| 2012 | Republic of Moldova | 18 (13-18)                | 26 (18-28)                | 34 (21-36)                |
| 2013 | Republic of Moldova | 19 (13-20)                | 28 (19-30)                | 36 (22-39)                |
| 2014 | Republic of Moldova | 17 (12-17)                | 26 (17-27)                | 34 (21-36)                |
| 2015 | Republic of Moldova | 12 (9-13)                 | 20 (14-21)                | 28 (17-30)                |
| 2000 | Romania             | 587 (416-611)             | 875 (590-921)             | 1126 (685-1206)           |
| 2001 | Romania             | 547 (388-570)             | 816 (550-859)             | 1050 (639-1124)           |
| 2002 | Romania             | 486 (345-506)             | 725 (489-763)             | 933 (568-999)             |
| 2003 | Romania             | 392 (278-408)             | 584 (394-615)             | 752 (457-805)             |
| 2004 | Romania             | 383 (271-399)             | 571 (385-601)             | 735 (447-787)             |
| 2005 | Romania             | 318 (226-332)             | 475 (320-500)             | 611 (372-655)             |
| 2006 | Romania             | 280 (199-292)             | 418 (282-440)             | 538 (327-576)             |
| 2007 | Romania             | 263 (187-274)             | 392 (265-413)             | 505 (307-541)             |
| 2008 | Romania             | 257 (182-268)             | 383 (258-403)             | 493 (300-528)             |
| 2009 | Romania             | 226 (160-236)             | 338 (228-356)             | 434 (264-465)             |
| 2010 | Romania             | 222 (158-231)             | 331 (223-349)             | 426 (259-457)             |
| 2011 | Romania             | 239 (170-249)             | 357 (241-376)             | 459 (279-492)             |
| 2012 | Romania             | 214 (151-223)             | 319 (215-336)             | 410 (249-439)             |
| 2013 | Romania             | 201 (143-210)             | 300 (202-316)             | 386 (235-413)             |
| 2014 | Romania             | 183 (130-191)             | 273 (184-288)             | 351 (214-376)             |
| 2015 | Romania             | 169 (120-177)             | 253 (170-266)             | 325 (198-348)             |
| 2000 | Russian Federation  | 1147 (813-1195)           | 1710 (1153-1801)          | 2201 (1339-2358)          |
| 2001 | Russian Federation  | 1090 (773-1136)           | 1626 (1097-1713)          | 2093 (1273-2242)          |
| 2002 | Russian Federation  | 997 (707-1039)            | 1487 (1003-1566)          | 1914 (1164-2050)          |
| 2003 | Russian Federation  | 876 (621-913)             | 1307 (882-1377)           | 1682 (1023-1802)          |
| 2004 | Russian Federation  | 790 (560-824)             | 1179 (795-1241)           | 1517 (923-1625)           |
| 2005 | Russian Federation  | 706 (501-736)             | 1053 (710-1109)           | 1355 (824-1451)           |
| 2006 | Russian Federation  | 632 (448-658)             | 942 (636-993)             | 1213 (738-1299)           |
| 2007 | Russian Federation  | 562 (399-586)             | 838 (565-883)             | 1079 (656-1156)           |
| 2008 | Russian Federation  | 509 (361-530)             | 759 (512-800)             | 977 (594-1046)            |
| 2009 | Russian Federation  | 477 (338-497)             | 712 (480-749)             | 915 (557-981)             |
| 2010 | Russian Federation  | 452 (320-471)             | 674 (454-709)             | 867 (527-928)             |
| 2011 | Russian Federation  | 425 (302-443)             | 634 (428-668)             | 816 (497-874)             |
| 2012 | Russian Federation  | 392 (278-408)             | 585 (394-616)             | 752 (458-806)             |
| 2013 | Russian Federation  | 395 (280-412)             | 589 (397-621)             | 758 (461-812)             |
| 2014 | Russian Federation  | 382 (271-399)             | 570 (385-601)             | 734 (447-786)             |
| 2015 | Russian Federation  | 373 (264-388)             | 556 (375-585)             | 715 (435-766)             |
| 2000 | Rwanda              | 3935 (2791-4101)          | 5870 (3959-6182)          | 7555 (4596-8092)          |
| 2001 | Rwanda              | 4037 (2863-4207)          | 6022 (4061-6342)          | 7750 (4715-8301)          |
| 2002 | Rwanda              | 3567 (2530-3718)          | 5321 (3589-5604)          | 6849 (4166-7335)          |
| 2003 | Rwanda              | 3222 (2285-3358)          | 4806 (3241-5062)          | 6186 (3763-6625)          |
| 2004 | Rwanda              | 2763 (1959-2879)          | 4121 (2779-4340)          | 5304 (3227-5681)          |
| 2005 | Rwanda              | 2407 (1707-2508)          | 3590 (2421-3781)          | 4620 (2811-4948)          |
| 2006 | Rwanda              | 2121 (1504-2210)          | 3164 (2134-3332)          | 4072 (2477-4361)          |
| 2007 | Rwanda              | 1895 (1344-1975)          | 2827 (1907-2977)          | 3639 (2214-3897)          |
| 2008 | Rwanda              | 1709 (1212-1781)          | 2549 (1719-2684)          | 3280 (1996-3513)          |
| 2009 | Rwanda              | 1548 (1098-1613)          | 2309 (1557-2432)          | 2972 (1808-3183)          |
| 2010 | Rwanda              | 1204 (854-1255)           | 1797 (1212-1892)          | 2312 (1407-2477)          |
| 2011 | Rwanda              | 880 (624-917)             | 1312 (885-1382)           | 1689 (1027-1809)          |
| 2012 | Rwanda              | 590 (418-615)             | 880 (593-926)             | 1132 (689-1213)           |
| 2013 | Rwanda              | 457 (324-476)             | 682 (460-718)             | 878 (534-940)             |
| 2014 | Rwanda              | 304 (215-317)             | 453 (306-477)             | 583 (355-625)             |

| Year | Country                          | Spn pneumonia deaths (UR) | Spn pneumonia deaths (UR) | Spn pneumonia deaths (UR) |
|------|----------------------------------|---------------------------|---------------------------|---------------------------|
| 2015 | Rwanda                           | 244 (173-254)             | 364 (245-383)             | 468 (285-502)             |
| 2000 | Saint Kitts and Nevis            | 0 (0-0)                   | 0 (0-0)                   | 0 (0-0)                   |
| 2001 | Saint Kitts and Nevis            | 0 (0-0)                   | 0 (0-0)                   | 1 (0-1)                   |
| 2002 | Saint Kitts and Nevis            | 0 (0-0)                   | 0 (0-0)                   | 1 (0-1)                   |
| 2003 | Saint Kitts and Nevis            | 0 (0-0)                   | 0 (0-0)                   | 1 (0-1)                   |
| 2004 | Saint Kitts and Nevis            | 0 (0-0)                   | 0 (0-0)                   | 0 (0-0)                   |
| 2005 | Saint Kitts and Nevis            | 0 (0-0)                   | 0 (0-0)                   | 0 (0-0)                   |
| 2006 | Saint Kitts and Nevis            | 0 (0-0)                   | 0 (0-0)                   | 0 (0-0)                   |
| 2007 | Saint Kitts and Nevis            | 0 (0-0)                   | 0 (0-0)                   | 0 (0-0)                   |
| 2008 | Saint Kitts and Nevis            | 0 (0-0)                   | 0 (0-0)                   | 0 (0-0)                   |
| 2009 | Saint Kitts and Nevis            | 0 (0-0)                   | 0 (0-0)                   | 0 (0-0)                   |
| 2010 | Saint Kitts and Nevis            | 0 (0-0)                   | 0 (0-0)                   | 0 (0-0)                   |
| 2011 | Saint Kitts and Nevis            | 0 (0-0)                   | 0 (0-0)                   | 0 (0-0)                   |
| 2012 | Saint Kitts and Nevis            | 0 (0-0)                   | 0 (0-0)                   | 0 (0-0)                   |
| 2013 | Saint Kitts and Nevis            | 0 (0-0)                   | 0 (0-0)                   | 0 (0-0)                   |
| 2014 | Saint Kitts and Nevis            | 0 (0-0)                   | 0 (0-0)                   | 0 (0-0)                   |
| 2015 | Saint Kitts and Nevis            | 0 (0-0)                   | 0 (0-0)                   | 0 (0-0)                   |
| 2000 | Saint Lucia                      | 1 (1-1)                   | 1 (1-1)                   | 1 (1-2)                   |
| 2001 | Saint Lucia                      | 1 (1-1)                   | 1 (1-1)                   | 2 (1-2)                   |
| 2002 | Saint Lucia                      | 1 (1-1)                   | 1 (1-1)                   | 2 (1-2)                   |
| 2003 | Saint Lucia                      | 1 (1-1)                   | 1 (1-1)                   | 2 (1-2)                   |
| 2004 | Saint Lucia                      | 1 (1-1)                   | 2 (1-2)                   | 2 (1-2)                   |
| 2005 | Saint Lucia                      | 1 (1-1)                   | 2 (1-2)                   | 3 (2-3)                   |
| 2006 | Saint Lucia                      | 2 (1-2)                   | 3 (2-3)                   | 3 (2-4)                   |
| 2007 | Saint Lucia                      | 1 (1-2)                   | 2 (1-2)                   | 3 (2-3)                   |
| 2008 | Saint Lucia                      | 1 (1-1)                   | 2 (1-2)                   | 2 (1-2)                   |
| 2009 | Saint Lucia                      | 1 (1-1)                   | 2 (1-2)                   | 2 (1-3)                   |
| 2010 | Saint Lucia                      | 1 (1-1)                   | 2 (1-2)                   | 2 (1-2)                   |
| 2011 | Saint Lucia                      | 1 (1-1)                   | 1 (1-1)                   | 1 (1-2)                   |
| 2012 | Saint Lucia                      | 0 (0-0)                   | 1 (0-1)                   | 1 (0-1)                   |
| 2013 | Saint Lucia                      | 0 (0-0)                   | 1 (0-1)                   | 1 (1-1)                   |
| 2014 | Saint Lucia                      | 1 (0-1)                   | 1 (1-1)                   | 1 (1-1)                   |
| 2015 | Saint Lucia                      | 1 (0-1)                   | 1 (1-1)                   | 1 (1-1)                   |
| 2000 | Saint Vincent and the Grenadines | 1 (0-1)                   | 1 (1-1)                   | 1 (1-1)                   |
| 2001 | Saint Vincent and the Grenadines | 1 (0-1)                   | 1 (1-1)                   | 1 (1-1)                   |
| 2002 | Saint Vincent and the Grenadines | 0 (0-0)                   | 0 (0-0)                   | 1 (0-1)                   |
| 2003 | Saint Vincent and the Grenadines | 0 (0-0)                   | 0 (0-0)                   | 0 (0-0)                   |
| 2004 | Saint Vincent and the Grenadines | 0 (0-0)                   | 1 (0-1)                   | 1 (0-1)                   |
| 2005 | Saint Vincent and the Grenadines | 0 (0-0)                   | 1 (0-1)                   | 1 (0-1)                   |
| 2006 | Saint Vincent and the Grenadines | 0 (0-0)                   | 1 (0-1)                   | 1 (1-1)                   |
| 2007 | Saint Vincent and the Grenadines | 0 (0-0)                   | 0 (0-0)                   | 0 (0-0)                   |
| 2008 | Saint Vincent and the Grenadines | 0 (0-0)                   | 0 (0-0)                   | 0 (0-0)                   |
| 2009 | Saint Vincent and the Grenadines | 0 (0-0)                   | 1 (0-1)                   | 1 (1-1)                   |
| 2010 | Saint Vincent and the Grenadines | 0 (0-0)                   | 1 (0-1)                   | 1 (1-1)                   |
| 2011 | Saint Vincent and the Grenadines | 1 (1-1)                   | 1 (1-1)                   | 2 (1-2)                   |
| 2012 | Saint Vincent and the Grenadines | 1 (1-1)                   | 1 (1-1)                   | 1 (1-1)                   |
| 2013 | Saint Vincent and the Grenadines | 1 (1-1)                   | 1 (1-1)                   | 2 (1-2)                   |
| 2014 | Saint Vincent and the Grenadines | 1 (0-1)                   | 1 (1-1)                   | 1 (1-1)                   |
| 2015 | Saint Vincent and the Grenadines | 1 (0-1)                   | 1 (1-1)                   | 1 (1-1)                   |
| 2000 | Samoa                            | 4 (3-4)                   | 6 (4-6)                   | 7 (5-8)                   |
| 2001 | Samoa                            | 4 (3-4)                   | 5 (4-6)                   | 7 (4-7)                   |
| 2002 | Samoa                            | 3 (2-3)                   | 5 (3-5)                   | 6 (4-7)                   |
| 2003 | Samoa                            | 3 (2-3)                   | 5 (3-5)                   | 6 (4-6)                   |
| 2004 | Samoa                            | 3 (2-3)                   | 4 (3-4)                   | 5 (3-6)                   |
| 2005 | Samoa                            | 3 (2-3)                   | 4 (3-4)                   | 5 (3-5)                   |
| 2006 | Samoa                            | 2 (2-3)                   | 4 (2-4)                   | 5 (3-5)                   |
| 2007 | Samoa                            | 2 (2-3)                   | 4 (2-4)                   | 5 (3-5)                   |
| 2008 | Samoa                            | 2 (2-2)                   | 3 (2-4)                   | 4 (3-5)                   |
| 2009 | Samoa                            | 3 (2-3)                   | 4 (3-4)                   | 5 (3-5)                   |
| 2010 | Samoa                            | 3 (2-3)                   | 4 (3-5)                   | 6 (3-6)                   |
| 2011 | Samoa                            | 3 (2-3)                   | 4 (3-5)                   | 6 (3-6)                   |
| 2012 | Samoa                            | 3 (2-3)                   | 4 (3-5)                   | 6 (3-6)                   |
| 2013 | Samoa                            | 3 (2-3)                   | 4 (3-4)                   | 5 (3-5)                   |
| 2014 | Samoa                            | 3 (2-3)                   | 4 (3-4)                   | 5 (3-5)                   |
| 2015 | Samoa                            | 2 (2-2)                   | 4 (2-4)                   | 5 (3-5)                   |
| 2000 | San Marino                       | 0 (0-0)                   | 0 (0-0)                   | 0 (0-0)                   |
| 2001 | San Marino                       | 0 (0-0)                   | 0 (0-0)                   | 0 (0-0)                   |
| 2002 | San Marino                       | 0 (0-0)                   | 0 (0-0)                   | 0 (0-0)                   |
| 2003 | San Marino                       | 0 (0-0)                   | 0 (0-0)                   | 0 (0-0)                   |
| 2004 | San Marino                       | 0 (0-0)                   | 0 (0-0)                   | 0 (0-0)                   |
| 2005 | San Marino                       | 0 (0-0)                   | 0 (0-0)                   | 0 (0-0)                   |
| 2006 | San Marino                       | 0 (0-0)                   | 0 (0-0)                   | 0 (0-0)                   |
| 2007 | San Marino                       | 0 (0-0)                   | 0 (0-0)                   | 0 (0-0)                   |
| 2008 | San Marino                       | 0 (0-0)                   | 0 (0-0)                   | 0 (0-0)                   |
| 2009 | San Marino                       | 0 (0-0)                   | 0 (0-0)                   | 0 (0-0)                   |
| 2010 | San Marino                       | 0 (0-0)                   | 0 (0-0)                   | 0 (0-0)                   |
| 2011 | San Marino                       | 0 (0-0)                   | 0 (0-0)                   | 0 (0-0)                   |
| 2012 | San Marino                       | 0 (0-0)                   | 0 (0-0)                   | 0 (0-0)                   |
| 2013 | San Marino                       | 0 (0-0)                   | 0 (0-0)                   | 0 (0-0)                   |
| 2014 | San Marino                       | 0 (0-0)                   | 0 (0-0)                   | 0 (0-0)                   |
| 2015 | San Marino                       | 0 (0-0)                   | 0 (0-0)                   | 0 (0-0)                   |
| 2000 | Sao Tome and Principe            | 28 (20-29)                | 42 (28-44)                | 54 (33-58)                |
| 2001 | Sao Tome and Principe            | 28 (20-29)                | 41 (28-43)                | 53 (32-57)                |
| 2002 | Sao Tome and Principe            | 27 (19-28)                | 40 (27-42)                | 52 (31-55)                |
| 2003 | Sao Tome and Principe            | 26 (18-27)                | 39 (26-41)                | 50 (30-54)                |
| 2004 | Sao Tome and Principe            | 25 (18-26)                | 37 (25-39)                | 48 (29-51)                |
| 2005 | Sao Tome and Principe            | 24 (17-25)                | 36 (24-38)                | 46 (28-49)                |
| 2006 | Sao Tome and Principe            | 23 (16-24)                | 35 (23-36)                | 44 (27-48)                |
| 2007 | Sao Tome and Principe            | 22 (16-23)                | 33 (22-35)                | 42 (26-45)                |
| 2008 | Sao Tome and Principe            | 22 (16-23)                | 33 (22-35)                | 42 (26-45)                |
| 2009 | Sao Tome and Principe            | 20 (14-21)                | 30 (21-32)                | 39 (24-42)                |
| 2010 | Sao Tome and Principe            | 20 (14-21)                | 30 (20-32)                | 39 (23-41)                |
| 2011 | Sao Tome and Principe            | 20 (14-20)                | 29 (20-31)                | 37 (23-40)                |
| 2012 | Sao Tome and Principe            | 19 (14-20)                | 28 (19-30)                | 37 (22-39)                |
| 2013 | Sao Tome and Principe            | 12 (9-13)                 | 18 (12-19)                | 23 (14-25)                |
| 2014 | Sao Tome and Principe            | 10 (7-10)                 | 15 (10-16)                | 19 (12-20)                |
| 2015 | Sao Tome and Principe            | 8 (6-9)                   | 13 (9-13)                 | 16 (10-17)                |
| 2000 | Saudi Arabia                     | 407 (289-424)             | 607 (409-639)             | 781 (475-837)             |
| 2001 | Saudi Arabia                     | 375 (266-390)             | 559 (377-588)             | 719 (437-770)             |
| 2002 | Saudi Arabia                     | 380 (269-396)             | 566 (382-596)             | 729 (443-780)             |
| 2003 | Saudi Arabia                     | 365 (259-380)             | 544 (367-573)             | 700 (426-750)             |
| 2004 | Saudi Arabia                     | 341 (242-355)             | 508 (343-535)             | 654 (398-700)             |
| 2005 | Saudi Arabia                     | 325 (231-339)             | 485 (327-511)             | 625 (380-669)             |
| 2006 | Saudi Arabia                     | 309 (219-322)             | 460 (310-485)             | 592 (360-635)             |
| 2007 | Saudi Arabia                     | 303 (215-316)             | 452 (305-476)             | 581 (354-623)             |
| 2008 | Saudi Arabia                     | 287 (204-299)             | 428 (289-451)             | 551 (335-591)             |
| 2009 | Saudi Arabia                     | 236 (168-246)             | 365 (246-385)             | 486 (296-520)             |
| 2010 | Saudi Arabia                     | 182 (129-189)             | 293 (197-308)             | 405 (246-433)             |
| 2011 | Saudi Arabia                     | 135 (96-141)              | 227 (153-240)             | 329 (200-352)             |



| Year | Country      | Spn pneumonia deaths (UR) | Spn pneumonia deaths (UR) | Spn pneumonia deaths (UR) |
|------|--------------|---------------------------|---------------------------|---------------------------|
| 2012 | Saudi Arabia | 119 (85-125)              | 203 (137-213)             | 296 (180-317)             |
| 2013 | Saudi Arabia | 89 (63-92)                | 155 (105-163)             | 235 (143-252)             |
| 2014 | Saudi Arabia | 78 (56-82)                | 138 (93-146)              | 212 (129-227)             |
| 2015 | Saudi Arabia | 73 (52-76)                | 130 (87-136)              | 199 (121-213)             |
| 2000 | Senegal      | 2951 (2093-3076)          | 4402 (2969-4636)          | 5666 (3447-6068)          |
| 2001 | Senegal      | 2988 (2119-3114)          | 4456 (3005-4693)          | 5735 (3489-6143)          |
| 2002 | Senegal      | 2904 (2059-3026)          | 4331 (2921-4562)          | 5575 (3391-5970)          |
| 2003 | Senegal      | 2799 (1985-2917)          | 4174 (2815-4396)          | 5373 (3268-5754)          |
| 2004 | Senegal      | 2681 (1901-2794)          | 3998 (2696-4211)          | 5146 (3131-5512)          |
| 2005 | Senegal      | 2548 (1807-2655)          | 3800 (2563-4003)          | 4891 (2976-5239)          |
| 2006 | Senegal      | 2419 (1716-2521)          | 3609 (2434-3801)          | 4645 (2826-4975)          |
| 2007 | Senegal      | 2276 (1614-2372)          | 3395 (2289-3575)          | 4369 (2658-4679)          |
| 2008 | Senegal      | 2139 (1517-2229)          | 3190 (2151-3360)          | 4106 (2498-4398)          |
| 2009 | Senegal      | 2009 (1424-2093)          | 2996 (2021-3155)          | 3856 (2346-4130)          |
| 2010 | Senegal      | 1898 (1346-1978)          | 2831 (1909-2981)          | 3643 (2216-3902)          |
| 2011 | Senegal      | 1798 (1275-1874)          | 2682 (1809-2825)          | 3452 (2100-3698)          |
| 2012 | Senegal      | 1726 (1224-1799)          | 2574 (1736-2711)          | 3313 (2016-3549)          |
| 2013 | Senegal      | 1684 (1194-1755)          | 2512 (1694-2645)          | 3232 (1966-3462)          |
| 2014 | Senegal      | 1144 (811-1192)           | 1707 (1151-1797)          | 2196 (1336-2353)          |
| 2015 | Senegal      | 909 (645-947)             | 1356 (914-1428)           | 1745 (1062-1869)          |
| 2000 | Serbia       | 25 (18-26)                | 38 (25-40)                | 48 (29-52)                |
| 2001 | Serbia       | 17 (12-18)                | 26 (17-27)                | 33 (20-36)                |
| 2002 | Serbia       | 14 (10-14)                | 21 (14-22)                | 26 (16-28)                |
| 2003 | Serbia       | 20 (14-21)                | 30 (20-32)                | 39 (24-42)                |
| 2004 | Serbia       | 19 (13-20)                | 28 (19-30)                | 36 (22-39)                |
| 2005 | Serbia       | 14 (10-15)                | 21 (14-23)                | 28 (17-30)                |
| 2006 | Serbia       | 9 (7-10)                  | 14 (9-15)                 | 18 (11-19)                |
| 2007 | Serbia       | 17 (12-17)                | 25 (17-26)                | 32 (20-34)                |
| 2008 | Serbia       | 15 (11-16)                | 23 (15-24)                | 29 (18-31)                |
| 2009 | Serbia       | 13 (9-14)                 | 20 (13-21)                | 25 (15-27)                |
| 2010 | Serbia       | 10 (7-11)                 | 15 (10-16)                | 20 (12-21)                |
| 2011 | Serbia       | 12 (9-13)                 | 18 (12-19)                | 24 (14-25)                |
| 2012 | Serbia       | 10 (7-11)                 | 15 (10-16)                | 20 (12-21)                |
| 2013 | Serbia       | 7 (5-7)                   | 10 (7-11)                 | 13 (8-14)                 |
| 2014 | Serbia       | 10 (7-10)                 | 14 (10-15)                | 18 (11-20)                |
| 2015 | Serbia       | 10 (7-10)                 | 14 (10-15)                | 18 (11-20)                |
| 2000 | Seychelles   | 0 (0-0)                   | 1 (0-1)                   | 1 (0-1)                   |
| 2001 | Seychelles   | 0 (0-0)                   | 1 (0-1)                   | 1 (0-1)                   |
| 2002 | Seychelles   | 0 (0-0)                   | 1 (0-1)                   | 1 (0-1)                   |
| 2003 | Seychelles   | 0 (0-0)                   | 1 (0-1)                   | 1 (0-1)                   |
| 2004 | Seychelles   | 0 (0-0)                   | 1 (0-1)                   | 1 (0-1)                   |
| 2005 | Seychelles   | 0 (0-0)                   | 1 (0-1)                   | 1 (0-1)                   |
| 2006 | Seychelles   | 0 (0-0)                   | 1 (0-1)                   | 1 (0-1)                   |
| 2007 | Seychelles   | 0 (0-0)                   | 1 (0-1)                   | 1 (0-1)                   |
| 2008 | Seychelles   | 0 (0-0)                   | 1 (0-1)                   | 1 (0-1)                   |
| 2009 | Seychelles   | 0 (0-0)                   | 1 (0-1)                   | 1 (0-1)                   |
| 2010 | Seychelles   | 0 (0-0)                   | 1 (0-1)                   | 1 (0-1)                   |
| 2011 | Seychelles   | 0 (0-0)                   | 1 (0-1)                   | 1 (1-1)                   |
| 2012 | Seychelles   | 0 (0-0)                   | 1 (0-1)                   | 1 (0-1)                   |
| 2013 | Seychelles   | 0 (0-0)                   | 1 (0-1)                   | 1 (1-1)                   |
| 2014 | Seychelles   | 0 (0-0)                   | 1 (0-1)                   | 1 (1-1)                   |
| 2015 | Seychelles   | 0 (0-0)                   | 1 (0-1)                   | 1 (1-1)                   |
| 2000 | Sierra Leone | 1807 (1281-1883)          | 2695 (1817-2838)          | 3468 (2110-3714)          |
| 2001 | Sierra Leone | 1841 (1305-1919)          | 2746 (1852-2892)          | 3534 (2150-3785)          |
| 2002 | Sierra Leone | 1895 (1344-1975)          | 2826 (1906-2976)          | 3637 (2213-3896)          |
| 2003 | Sierra Leone | 1962 (1391-2045)          | 2927 (1974-3083)          | 3767 (2292-4035)          |
| 2004 | Sierra Leone | 2036 (1444-2122)          | 3037 (2048-3198)          | 3908 (2378-4186)          |
| 2005 | Sierra Leone | 2080 (1475-2167)          | 3102 (2092-3267)          | 3992 (2429-4276)          |
| 2006 | Sierra Leone | 2108 (1495-2197)          | 3144 (2120-3311)          | 4046 (2462-4334)          |
| 2007 | Sierra Leone | 2061 (1462-2148)          | 3074 (2073-3238)          | 3957 (2407-4238)          |
| 2008 | Sierra Leone | 1960 (1390-2043)          | 2924 (1972-3079)          | 3763 (2289-4030)          |
| 2009 | Sierra Leone | 1839 (1304-1917)          | 2743 (1850-2889)          | 3531 (2148-3782)          |
| 2010 | Sierra Leone | 1725 (1223-1798)          | 2573 (1735-2710)          | 3312 (2015-3547)          |
| 2011 | Sierra Leone | 1201 (851-1251)           | 1791 (1208-1886)          | 2305 (1402-2469)          |
| 2012 | Sierra Leone | 937 (664-977)             | 1398 (943-1472)           | 1799 (1094-1927)          |
| 2013 | Sierra Leone | 807 (573-842)             | 1204 (812-1268)           | 1550 (943-1660)           |
| 2014 | Sierra Leone | 796 (565-830)             | 1188 (801-1251)           | 1529 (930-1637)           |
| 2015 | Sierra Leone | 554 (393-578)             | 827 (558-871)             | 1064 (647-1140)           |
| 2000 | Singapore    | 5 (4-5)                   | 8 (5-8)                   | 10 (6-10)                 |
| 2001 | Singapore    | 6 (4-7)                   | 9 (6-10)                  | 12 (7-13)                 |
| 2002 | Singapore    | 6 (5-7)                   | 10 (6-10)                 | 12 (8-13)                 |
| 2003 | Singapore    | 9 (6-10)                  | 14 (9-14)                 | 18 (11-19)                |
| 2004 | Singapore    | 7 (5-8)                   | 11 (7-11)                 | 14 (8-15)                 |
| 2005 | Singapore    | 8 (6-8)                   | 12 (8-13)                 | 15 (9-16)                 |
| 2006 | Singapore    | 8 (5-8)                   | 11 (8-12)                 | 15 (9-16)                 |
| 2007 | Singapore    | 9 (7-10)                  | 14 (9-15)                 | 18 (11-19)                |
| 2008 | Singapore    | 5 (4-5)                   | 8 (5-8)                   | 10 (6-10)                 |
| 2009 | Singapore    | 6 (4-6)                   | 8 (6-9)                   | 11 (7-12)                 |
| 2010 | Singapore    | 4 (3-4)                   | 5 (4-6)                   | 7 (4-7)                   |
| 2011 | Singapore    | 5 (3-5)                   | 7 (5-7)                   | 9 (5-9)                   |
| 2012 | Singapore    | 8 (6-8)                   | 12 (8-12)                 | 15 (9-16)                 |
| 2013 | Singapore    | 5 (4-5)                   | 8 (6-9)                   | 11 (7-12)                 |
| 2014 | Singapore    | 5 (4-6)                   | 9 (6-9)                   | 12 (7-13)                 |
| 2015 | Singapore    | 5 (4-5)                   | 8 (6-9)                   | 12 (7-13)                 |
| 2000 | Slovakia     | 22 (16-23)                | 33 (22-35)                | 43 (26-46)                |
| 2001 | Slovakia     | 19 (13-20)                | 28 (19-30)                | 36 (22-39)                |
| 2002 | Slovakia     | 19 (13-20)                | 28 (19-29)                | 36 (22-39)                |
| 2003 | Slovakia     | 17 (12-17)                | 25 (17-26)                | 32 (20-34)                |
| 2004 | Slovakia     | 18 (13-18)                | 26 (18-28)                | 34 (21-36)                |
| 2005 | Slovakia     | 19 (14-20)                | 29 (20-31)                | 37 (23-40)                |
| 2006 | Slovakia     | 16 (11-16)                | 23 (16-24)                | 30 (18-32)                |
| 2007 | Slovakia     | 21 (15-21)                | 31 (21-32)                | 39 (24-42)                |
| 2008 | Slovakia     | 21 (15-22)                | 31 (21-33)                | 40 (24-43)                |
| 2009 | Slovakia     | 11 (8-12)                 | 18 (12-19)                | 25 (15-26)                |
| 2010 | Slovakia     | 8 (5-8)                   | 13 (8-13)                 | 18 (11-19)                |
| 2011 | Slovakia     | 7 (5-7)                   | 11 (8-12)                 | 17 (10-18)                |
| 2012 | Slovakia     | 6 (4-6)                   | 10 (7-11)                 | 15 (9-17)                 |
| 2013 | Slovakia     | 6 (4-6)                   | 10 (7-11)                 | 15 (9-17)                 |
| 2014 | Slovakia     | 5 (4-5)                   | 9 (6-9)                   | 13 (8-14)                 |
| 2015 | Slovakia     | 6 (4-6)                   | 10 (6-10)                 | 14 (9-15)                 |
| 2000 | Slovenia     | 0 (0-0)                   | 0 (0-0)                   | 0 (0-0)                   |
| 2001 | Slovenia     | 1 (0-1)                   | 1 (1-1)                   | 1 (1-1)                   |
| 2002 | Slovenia     | 1 (1-1)                   | 1 (1-1)                   | 2 (1-2)                   |
| 2003 | Slovenia     | 2 (1-2)                   | 2 (2-2)                   | 3 (2-3)                   |
| 2004 | Slovenia     | 0 (0-1)                   | 1 (0-1)                   | 1 (1-1)                   |
| 2005 | Slovenia     | 0 (0-0)                   | 1 (0-1)                   | 1 (0-1)                   |
| 2006 | Slovenia     | 0 (0-0)                   | 0 (0-0)                   | 0 (0-0)                   |
| 2007 | Slovenia     | 1 (1-1)                   | 2 (1-2)                   | 2 (1-2)                   |
| 2008 | Slovenia     | 0 (0-0)                   | 0 (0-0)                   | 0 (0-0)                   |

| Year | Country         | Spn pneumonia deaths (UR) | Spn pneumonia deaths (UR) | Spn pneumonia deaths (UR) |
|------|-----------------|---------------------------|---------------------------|---------------------------|
| 2009 | Slovenia        | 1 (1-1)                   | 1 (1-1)                   | 2 (1-2)                   |
| 2010 | Slovenia        | 1 (1-1)                   | 1 (1-1)                   | 2 (1-2)                   |
| 2011 | Slovenia        | 1 (0-1)                   | 1 (1-1)                   | 1 (1-1)                   |
| 2012 | Slovenia        | 1 (0-1)                   | 1 (1-1)                   | 1 (1-1)                   |
| 2013 | Slovenia        | 1 (0-1)                   | 1 (1-1)                   | 1 (1-1)                   |
| 2014 | Slovenia        | 0 (0-0)                   | 1 (0-1)                   | 1 (1-1)                   |
| 2015 | Slovenia        | 0 (0-0)                   | 1 (0-1)                   | 1 (0-1)                   |
| 2000 | Solomon Islands | 22 (16-23)                | 34 (23-35)                | 43 (26-46)                |
| 2001 | Solomon Islands | 23 (16-24)                | 34 (23-36)                | 44 (27-47)                |
| 2002 | Solomon Islands | 24 (17-25)                | 35 (24-37)                | 45 (28-49)                |
| 2003 | Solomon Islands | 24 (17-25)                | 36 (24-38)                | 46 (28-50)                |
| 2004 | Solomon Islands | 25 (18-26)                | 38 (25-40)                | 49 (30-52)                |
| 2005 | Solomon Islands | 26 (18-27)                | 39 (26-41)                | 50 (30-53)                |
| 2006 | Solomon Islands | 27 (19-28)                | 40 (27-42)                | 51 (31-55)                |
| 2007 | Solomon Islands | 27 (19-28)                | 40 (27-42)                | 52 (31-55)                |
| 2008 | Solomon Islands | 27 (19-28)                | 40 (27-43)                | 52 (32-56)                |
| 2009 | Solomon Islands | 27 (19-28)                | 41 (27-43)                | 52 (32-56)                |
| 2010 | Solomon Islands | 27 (19-28)                | 40 (27-43)                | 52 (32-56)                |
| 2011 | Solomon Islands | 27 (19-28)                | 40 (27-42)                | 52 (31-55)                |
| 2012 | Solomon Islands | 26 (19-27)                | 39 (26-41)                | 51 (31-54)                |
| 2013 | Solomon Islands | 26 (18-27)                | 38 (26-40)                | 49 (30-53)                |
| 2014 | Solomon Islands | 25 (17-26)                | 37 (25-39)                | 47 (29-51)                |
| 2015 | Solomon Islands | 18 (12-18)                | 26 (18-28)                | 34 (20-36)                |
| 2000 | Somalia         | 3620 (2567-3772)          | 5399 (3641-5686)          | 6949 (4228-7443)          |
| 2001 | Somalia         | 3687 (2615-3843)          | 5500 (3709-5792)          | 7079 (4306-7581)          |
| 2002 | Somalia         | 3838 (2722-4000)          | 5725 (3861-6029)          | 7368 (4483-7892)          |
| 2003 | Somalia         | 4111 (2915-4284)          | 6131 (4135-6457)          | 7891 (4801-8452)          |
| 2004 | Somalia         | 4235 (3003-4414)          | 6318 (4260-6654)          | 8131 (4947-8709)          |
| 2005 | Somalia         | 4394 (3116-4579)          | 6554 (4420-6902)          | 8435 (5131-9034)          |
| 2006 | Somalia         | 4554 (3229-4745)          | 6792 (4580-7153)          | 8742 (5318-9363)          |
| 2007 | Somalia         | 4716 (3344-4915)          | 7035 (4744-7409)          | 9054 (5508-9697)          |
| 2008 | Somalia         | 4833 (3427-5037)          | 7209 (4862-7593)          | 9279 (5645-9938)          |
| 2009 | Somalia         | 4906 (3479-5113)          | 7318 (4935-7707)          | 9419 (5730-10088)         |
| 2010 | Somalia         | 4928 (3494-5135)          | 7350 (4957-7741)          | 9460 (5755-10132)         |
| 2011 | Somalia         | 4885 (3464-5091)          | 7286 (4914-7674)          | 9378 (5705-10044)         |
| 2012 | Somalia         | 4789 (3396-4991)          | 7143 (4817-7523)          | 9193 (5593-9846)          |
| 2013 | Somalia         | 4688 (3324-4886)          | 6993 (4716-7365)          | 9000 (5475-9639)          |
| 2014 | Somalia         | 4558 (3232-4750)          | 6799 (4585-7161)          | 8751 (5324-9372)          |
| 2015 | Somalia         | 4493 (3186-4682)          | 6701 (4519-7057)          | 8624 (5247-9237)          |
| 2000 | South Africa    | 4235 (3003-4413)          | 6316 (4260-6652)          | 8130 (4946-8707)          |
| 2001 | South Africa    | 4220 (2993-4398)          | 6295 (4245-6630)          | 8102 (4929-8677)          |
| 2002 | South Africa    | 4045 (2869-4216)          | 6034 (4069-6355)          | 7766 (4725-8318)          |
| 2003 | South Africa    | 3789 (2686-3948)          | 5651 (3811-5951)          | 7273 (4425-7790)          |
| 2004 | South Africa    | 3550 (2518-3700)          | 5296 (3571-5577)          | 6816 (4146-7300)          |
| 2005 | South Africa    | 3443 (2441-3588)          | 5135 (3463-5408)          | 6609 (4021-7079)          |
| 2006 | South Africa    | 3420 (2425-3564)          | 5101 (3440-5373)          | 6566 (3994-7032)          |
| 2007 | South Africa    | 3518 (2495-3666)          | 5248 (3539-5527)          | 6754 (4109-7234)          |
| 2008 | South Africa    | 3696 (2621-3852)          | 5513 (3718-5807)          | 7096 (4317-7600)          |
| 2009 | South Africa    | 3751 (2660-3910)          | 5596 (3774-5893)          | 7202 (4381-7713)          |
| 2010 | South Africa    | 3392 (2405-3535)          | 5059 (3412-5328)          | 6511 (3961-6974)          |
| 2011 | South Africa    | 2943 (2087-3067)          | 4390 (2960-4623)          | 5650 (3437-6051)          |
| 2012 | South Africa    | 2182 (1547-2274)          | 3255 (2195-3428)          | 4189 (2548-4486)          |
| 2013 | South Africa    | 2016 (1430-2101)          | 3008 (2028-3168)          | 3871 (2355-4146)          |
| 2014 | South Africa    | 1786 (1267-1862)          | 2665 (1797-2806)          | 3429 (2086-3673)          |
| 2015 | South Africa    | 1118 (793-1165)           | 1668 (1125-1756)          | 2146 (1306-2299)          |
| 2000 | South Sudan     | 2919 (2070-3042)          | 4354 (2936-4585)          | 5603 (3409-6001)          |
| 2001 | South Sudan     | 2928 (2076-3052)          | 4368 (2946-4600)          | 5622 (3420-6021)          |
| 2002 | South Sudan     | 2836 (2011-2956)          | 4230 (2853-4455)          | 5444 (3312-5831)          |
| 2003 | South Sudan     | 2739 (1942-2855)          | 4086 (2756-4303)          | 5259 (3199-5632)          |
| 2004 | South Sudan     | 2651 (1880-2763)          | 3954 (2667-4164)          | 5089 (3096-5450)          |
| 2005 | South Sudan     | 2518 (1786-2624)          | 3756 (2533-3956)          | 4834 (2941-5178)          |
| 2006 | South Sudan     | 2457 (1743-2561)          | 3665 (2472-3860)          | 4718 (2870-5053)          |
| 2007 | South Sudan     | 2410 (1709-2512)          | 3595 (2424-3786)          | 4627 (2815-4956)          |
| 2008 | South Sudan     | 2444 (1733-2547)          | 3645 (2458-3839)          | 4691 (2854-5024)          |
| 2009 | South Sudan     | 2434 (1726-2537)          | 3631 (2449-3824)          | 4674 (2843-5005)          |
| 2010 | South Sudan     | 2437 (1728-2539)          | 3634 (2451-3828)          | 4678 (2846-5010)          |
| 2011 | South Sudan     | 2434 (1726-2536)          | 3630 (2448-3823)          | 4672 (2842-5004)          |
| 2012 | South Sudan     | 2345 (1663-2444)          | 3498 (2359-3684)          | 4502 (2739-4821)          |
| 2013 | South Sudan     | 2367 (1678-2467)          | 3530 (2381-3718)          | 4544 (2764-4867)          |
| 2014 | South Sudan     | 2323 (1647-2421)          | 3465 (2336-3649)          | 4459 (2713-4776)          |
| 2015 | South Sudan     | 2287 (1622-2384)          | 3412 (2301-3593)          | 4391 (2671-4703)          |
| 2000 | Spain           | 18 (13-18)                | 26 (18-28)                | 34 (21-36)                |
| 2001 | Spain           | 6 (4-6)                   | 9 (6-10)                  | 12 (7-13)                 |
| 2002 | Spain           | 16 (12-17)                | 24 (16-25)                | 31 (19-33)                |
| 2003 | Spain           | 18 (13-19)                | 27 (18-28)                | 35 (21-37)                |
| 2004 | Spain           | 14 (10-15)                | 21 (14-22)                | 27 (16-29)                |
| 2005 | Spain           | 13 (9-14)                 | 20 (13-21)                | 25 (15-27)                |
| 2006 | Spain           | 18 (12-18)                | 26 (18-28)                | 34 (20-36)                |
| 2007 | Spain           | 22 (16-23)                | 33 (22-34)                | 42 (26-45)                |
| 2008 | Spain           | 13 (9-14)                 | 19 (13-20)                | 25 (15-27)                |
| 2009 | Spain           | 17 (12-17)                | 25 (17-26)                | 32 (19-34)                |
| 2010 | Spain           | 14 (10-15)                | 21 (14-23)                | 28 (17-30)                |
| 2011 | Spain           | 12 (9-13)                 | 18 (12-19)                | 23 (14-25)                |
| 2012 | Spain           | 9 (6-9)                   | 13 (9-14)                 | 17 (10-18)                |
| 2013 | Spain           | 7 (5-7)                   | 10 (7-11)                 | 13 (8-14)                 |
| 2014 | Spain           | 8 (6-8)                   | 12 (8-13)                 | 15 (9-16)                 |
| 2015 | Spain           | 7 (5-8)                   | 11 (7-11)                 | 14 (8-15)                 |
| 2000 | Sri Lanka       | 126 (89-131)              | 188 (127-198)             | 242 (147-259)             |
| 2001 | Sri Lanka       | 119 (84-124)              | 177 (119-186)             | 238 (138-244)             |
| 2002 | Sri Lanka       | 113 (80-117)              | 168 (113-177)             | 216 (132-232)             |
| 2003 | Sri Lanka       | 110 (78-115)              | 164 (111-173)             | 211 (128-226)             |
| 2004 | Sri Lanka       | 101 (72-105)              | 151 (102-159)             | 194 (118-208)             |
| 2005 | Sri Lanka       | 99 (70-103)               | 147 (99-155)              | 189 (115-203)             |
| 2006 | Sri Lanka       | 90 (64-94)                | 134 (91-141)              | 173 (105-185)             |
| 2007 | Sri Lanka       | 83 (59-87)                | 124 (84-131)              | 160 (97-171)              |
| 2008 | Sri Lanka       | 76 (54-79)                | 114 (77-120)              | 146 (89-157)              |
| 2009 | Sri Lanka       | 71 (50-74)                | 106 (72-112)              | 137 (83-146)              |
| 2010 | Sri Lanka       | 76 (54-80)                | 114 (77-120)              | 146 (89-157)              |
| 2011 | Sri Lanka       | 74 (53-77)                | 111 (75-117)              | 142 (87-153)              |
| 2012 | Sri Lanka       | 70 (50-73)                | 105 (71-110)              | 135 (82-145)              |
| 2013 | Sri Lanka       | 67 (47-69)                | 99 (67-105)               | 128 (78-137)              |
| 2014 | Sri Lanka       | 62 (44-65)                | 92 (62-97)                | 119 (72-127)              |
| 2015 | Sri Lanka       | 61 (43-63)                | 90 (61-95)                | 116 (71-124)              |
| 2000 | Sudan           | 7034 (4988-7330)          | 10492 (7075-11049)        | 13503 (8215-14462)        |
| 2001 | Sudan           | 7230 (5127-7534)          | 10784 (7272-11357)        | 13879 (8443-14865)        |
| 2002 | Sudan           | 7214 (5116-7519)          | 10761 (7257-11333)        | 13850 (8426-14834)        |
| 2003 | Sudan           | 7213 (5115-7517)          | 10759 (7255-11331)        | 13847 (8424-14830)        |
| 2004 | Sudan           | 7168 (5083-7470)          | 10692 (7211-11261)        | 13761 (8372-14739)        |
| 2005 | Sudan           | 6914 (4903-7206)          | 10313 (6955-10862)        | 13273 (8075-14216)        |

| Year | Country              | Spn pneumonia deaths (UR) | Spn pneumonia deaths (UR) | Spn pneumonia deaths (UR) |
|------|----------------------|---------------------------|---------------------------|---------------------------|
| 2006 | Sudan                | 6820 (4836-7108)          | 10173 (6861-10714)        | 13093 (7965-14023)        |
| 2007 | Sudan                | 6692 (4745-6974)          | 9982 (6732-10513)         | 12847 (7816-13760)        |
| 2008 | Sudan                | 6723 (4768-7007)          | 10029 (6763-10562)        | 12907 (7852-13824)        |
| 2009 | Sudan                | 6541 (4638-6817)          | 9757 (6580-10275)         | 12557 (7639-13449)        |
| 2010 | Sudan                | 6377 (4522-6645)          | 9511 (6414-10017)         | 12241 (7447-13111)        |
| 2011 | Sudan                | 6311 (4475-6577)          | 9413 (6348-9914)          | 12115 (7370-12975)        |
| 2012 | Sudan                | 6103 (4328-6360)          | 9103 (6139-9587)          | 11716 (7128-12548)        |
| 2013 | Sudan                | 5430 (3850-5659)          | 8099 (5462-8530)          | 10424 (6342-11165)        |
| 2014 | Sudan                | 3637 (2579-3790)          | 5425 (3658-5713)          | 6982 (4247-7478)          |
| 2015 | Sudan                | 3072 (2178-3201)          | 4582 (3090-4826)          | 5897 (3588-6316)          |
| 2000 | Suriname             | 7 (5-7)                   | 10 (7-10)                 | 13 (8-14)                 |
| 2001 | Suriname             | 7 (5-7)                   | 10 (7-11)                 | 13 (8-14)                 |
| 2002 | Suriname             | 4 (3-4)                   | 5 (4-6)                   | 7 (4-7)                   |
| 2003 | Suriname             | 10 (7-11)                 | 15 (10-16)                | 20 (12-21)                |
| 2004 | Suriname             | 4 (3-4)                   | 6 (4-6)                   | 8 (5-8)                   |
| 2005 | Suriname             | 10 (7-10)                 | 15 (10-16)                | 19 (12-20)                |
| 2006 | Suriname             | 7 (5-7)                   | 10 (7-11)                 | 13 (8-14)                 |
| 2007 | Suriname             | 9 (7-10)                  | 14 (9-15)                 | 18 (11-19)                |
| 2008 | Suriname             | 6 (4-6)                   | 9 (6-9)                   | 11 (7-12)                 |
| 2009 | Suriname             | 8 (6-9)                   | 12 (8-13)                 | 16 (10-17)                |
| 2010 | Suriname             | 9 (6-9)                   | 13 (9-14)                 | 17 (10-18)                |
| 2011 | Suriname             | 6 (4-6)                   | 9 (6-9)                   | 11 (7-12)                 |
| 2012 | Suriname             | 8 (6-8)                   | 12 (8-12)                 | 15 (9-16)                 |
| 2013 | Suriname             | 7 (5-7)                   | 10 (7-11)                 | 13 (8-14)                 |
| 2014 | Suriname             | 7 (5-7)                   | 10 (7-10)                 | 13 (8-14)                 |
| 2015 | Suriname             | 6 (5-7)                   | 10 (6-10)                 | 12 (8-13)                 |
| 2000 | Swaziland            | 209 (148-218)             | 311 (210-328)             | 401 (244-429)             |
| 2001 | Swaziland            | 215 (152-224)             | 320 (216-337)             | 412 (251-441)             |
| 2002 | Swaziland            | 218 (155-228)             | 326 (220-343)             | 419 (255-449)             |
| 2003 | Swaziland            | 221 (157-230)             | 329 (222-347)             | 424 (258-454)             |
| 2004 | Swaziland            | 221 (156-230)             | 329 (222-347)             | 424 (258-454)             |
| 2005 | Swaziland            | 219 (156-229)             | 327 (221-345)             | 421 (256-451)             |
| 2006 | Swaziland            | 214 (152-223)             | 319 (215-336)             | 411 (250-440)             |
| 2007 | Swaziland            | 209 (148-218)             | 311 (210-328)             | 401 (244-429)             |
| 2008 | Swaziland            | 202 (143-211)             | 302 (203-318)             | 388 (236-416)             |
| 2009 | Swaziland            | 193 (137-201)             | 287 (194-303)             | 370 (225-396)             |
| 2010 | Swaziland            | 182 (129-190)             | 272 (183-286)             | 350 (213-375)             |
| 2011 | Swaziland            | 173 (123-180)             | 258 (174-272)             | 332 (202-355)             |
| 2012 | Swaziland            | 166 (118-173)             | 247 (167-261)             | 318 (194-341)             |
| 2013 | Swaziland            | 159 (113-166)             | 238 (160-250)             | 306 (186-328)             |
| 2014 | Swaziland            | 115 (81-120)              | 171 (115-180)             | 220 (134-236)             |
| 2015 | Swaziland            | 88 (63-92)                | 132 (89-139)              | 169 (103-181)             |
| 2000 | Sweden               | 2 (1-2)                   | 3 (2-3)                   | 3 (2-4)                   |
| 2001 | Sweden               | 2 (2-2)                   | 3 (2-3)                   | 4 (3-4)                   |
| 2002 | Sweden               | 2 (1-2)                   | 3 (2-3)                   | 4 (2-4)                   |
| 2003 | Sweden               | 4 (3-4)                   | 6 (4-6)                   | 8 (5-8)                   |
| 2004 | Sweden               | 5 (4-5)                   | 7 (5-8)                   | 9 (6-10)                  |
| 2005 | Sweden               | 5 (3-5)                   | 7 (5-7)                   | 9 (5-9)                   |
| 2006 | Sweden               | 3 (2-3)                   | 4 (3-4)                   | 5 (3-6)                   |
| 2007 | Sweden               | 4 (3-4)                   | 6 (4-6)                   | 8 (5-8)                   |
| 2008 | Sweden               | 7 (5-7)                   | 11 (7-12)                 | 15 (9-16)                 |
| 2009 | Sweden               | 2 (2-2)                   | 4 (3-4)                   | 5 (3-6)                   |
| 2010 | Sweden               | 2 (2-2)                   | 4 (3-4)                   | 6 (4-7)                   |
| 2011 | Sweden               | 3 (2-3)                   | 4 (3-5)                   | 7 (4-7)                   |
| 2012 | Sweden               | 1 (1-1)                   | 2 (1-2)                   | 3 (2-3)                   |
| 2013 | Sweden               | 2 (1-2)                   | 3 (2-4)                   | 5 (3-6)                   |
| 2014 | Sweden               | 2 (1-2)                   | 3 (2-4)                   | 5 (3-5)                   |
| 2015 | Sweden               | 2 (1-2)                   | 3 (2-4)                   | 5 (3-5)                   |
| 2000 | Switzerland          | 2 (1-2)                   | 3 (2-3)                   | 4 (2-4)                   |
| 2001 | Switzerland          | 3 (2-4)                   | 5 (3-5)                   | 7 (4-7)                   |
| 2002 | Switzerland          | 3 (2-3)                   | 4 (3-4)                   | 5 (3-6)                   |
| 2003 | Switzerland          | 2 (1-2)                   | 3 (2-3)                   | 4 (2-4)                   |
| 2004 | Switzerland          | 1 (1-1)                   | 2 (1-2)                   | 2 (1-2)                   |
| 2005 | Switzerland          | 3 (2-3)                   | 4 (3-5)                   | 6 (3-6)                   |
| 2006 | Switzerland          | 1 (1-1)                   | 2 (1-2)                   | 2 (1-2)                   |
| 2007 | Switzerland          | 1 (1-1)                   | 2 (1-2)                   | 2 (1-2)                   |
| 2008 | Switzerland          | 2 (2-2)                   | 3 (2-4)                   | 4 (3-5)                   |
| 2009 | Switzerland          | 2 (1-2)                   | 3 (2-3)                   | 3 (2-4)                   |
| 2010 | Switzerland          | 2 (1-2)                   | 3 (2-3)                   | 4 (2-4)                   |
| 2011 | Switzerland          | 1 (1-1)                   | 1 (1-2)                   | 2 (1-2)                   |
| 2012 | Switzerland          | 0 (0-0)                   | 1 (0-1)                   | 1 (1-1)                   |
| 2013 | Switzerland          | 0 (0-0)                   | 1 (1-1)                   | 1 (1-1)                   |
| 2014 | Switzerland          | 0 (0-0)                   | 1 (0-1)                   | 1 (1-1)                   |
| 2015 | Switzerland          | 0 (0-0)                   | 1 (0-1)                   | 1 (1-1)                   |
| 2000 | Syrian Arab Republic | 476 (338-496)             | 710 (479-748)             | 914 (556-979)             |
| 2001 | Syrian Arab Republic | 479 (340-499)             | 714 (482-752)             | 919 (559-985)             |
| 2002 | Syrian Arab Republic | 443 (314-462)             | 661 (445-696)             | 850 (517-911)             |
| 2003 | Syrian Arab Republic | 396 (281-412)             | 590 (398-622)             | 760 (462-814)             |
| 2004 | Syrian Arab Republic | 358 (254-373)             | 534 (360-563)             | 688 (418-737)             |
| 2005 | Syrian Arab Republic | 331 (235-345)             | 494 (333-520)             | 635 (387-681)             |
| 2006 | Syrian Arab Republic | 318 (225-331)             | 474 (320-499)             | 610 (371-654)             |
| 2007 | Syrian Arab Republic | 310 (220-323)             | 462 (312-487)             | 595 (362-637)             |
| 2008 | Syrian Arab Republic | 299 (212-312)             | 447 (301-470)             | 575 (350-616)             |
| 2009 | Syrian Arab Republic | 291 (206-303)             | 434 (293-457)             | 558 (340-598)             |
| 2010 | Syrian Arab Republic | 262 (186-273)             | 391 (264-412)             | 503 (306-539)             |
| 2011 | Syrian Arab Republic | 231 (164-240)             | 344 (232-362)             | 443 (269-474)             |
| 2012 | Syrian Arab Republic | 184 (130-193)             | 274 (185-289)             | 353 (215-378)             |
| 2013 | Syrian Arab Republic | 148 (105-154)             | 220 (149-232)             | 283 (172-304)             |
| 2014 | Syrian Arab Republic | 127 (80-132)              | 189 (128-199)             | 244 (148-261)             |
| 2015 | Syrian Arab Republic | 123 (87-128)              | 183 (123-193)             | 236 (143-252)             |
| 2000 | Tajikistan           | 1247 (884-1299)           | 1860 (1254-1958)          | 2393 (1456-2563)          |
| 2001 | Tajikistan           | 1128 (800-1176)           | 1683 (1135-1772)          | 2166 (1318-2320)          |
| 2002 | Tajikistan           | 1006 (713-1048)           | 1500 (1012-1580)          | 1930 (1174-2068)          |
| 2003 | Tajikistan           | 895 (635-933)             | 1336 (901-1407)           | 1719 (1046-1841)          |
| 2004 | Tajikistan           | 813 (577-848)             | 1213 (818-1278)           | 1562 (950-1673)           |
| 2005 | Tajikistan           | 756 (536-788)             | 1128 (760-1188)           | 1451 (883-1554)           |
| 2006 | Tajikistan           | 717 (508-747)             | 1070 (721-1126)           | 1376 (837-1474)           |
| 2007 | Tajikistan           | 700 (496-729)             | 1044 (704-1099)           | 1343 (817-1438)           |
| 2008 | Tajikistan           | 697 (494-726)             | 1039 (701-1095)           | 1338 (814-1433)           |
| 2009 | Tajikistan           | 708 (502-738)             | 1056 (712-1112)           | 1359 (827-1455)           |
| 2010 | Tajikistan           | 717 (509-748)             | 1070 (722-1127)           | 1377 (838-1475)           |
| 2011 | Tajikistan           | 724 (514-755)             | 1080 (728-1138)           | 1390 (846-1489)           |
| 2012 | Tajikistan           | 729 (517-760)             | 1087 (733-1145)           | 1399 (851-1499)           |
| 2013 | Tajikistan           | 727 (516-758)             | 1085 (731-1142)           | 1396 (849-1495)           |
| 2014 | Tajikistan           | 720 (510-750)             | 1073 (724-1130)           | 1381 (840-1479)           |
| 2015 | Tajikistan           | 700 (496-729)             | 1044 (704-1099)           | 1343 (817-1439)           |
| 2000 | Thailand             | 635 (450-662)             | 947 (639-998)             | 1219 (742-1306)           |
| 2001 | Thailand             | 582 (413-607)             | 868 (585-914)             | 1117 (680-1197)           |
| 2002 | Thailand             | 540 (383-563)             | 805 (543-848)             | 1036 (631-1110)           |

| Year | Country                                   | Spn pneumonia deaths (UR) | Spn pneumonia deaths (UR) | Spn pneumonia deaths (UR) |
|------|-------------------------------------------|---------------------------|---------------------------|---------------------------|
| 2003 | Thailand                                  | 504 (357-525)             | 752 (507-792)             | 968 (589-1036)            |
| 2004 | Thailand                                  | 465 (330-484)             | 693 (468-730)             | 892 (543-956)             |
| 2005 | Thailand                                  | 423 (300-440)             | 630 (425-664)             | 811 (493-869)             |
| 2006 | Thailand                                  | 387 (274-403)             | 577 (389-608)             | 743 (452-795)             |
| 2007 | Thailand                                  | 355 (251-370)             | 529 (357-557)             | 681 (414-729)             |
| 2008 | Thailand                                  | 322 (228-335)             | 480 (323-505)             | 617 (375-661)             |
| 2009 | Thailand                                  | 302 (214-314)             | 450 (303-474)             | 579 (352-620)             |
| 2010 | Thailand                                  | 285 (202-297)             | 426 (287-448)             | 548 (333-587)             |
| 2011 | Thailand                                  | 268 (190-280)             | 400 (270-422)             | 515 (313-552)             |
| 2012 | Thailand                                  | 252 (179-263)             | 377 (254-397)             | 485 (295-519)             |
| 2013 | Thailand                                  | 239 (170-249)             | 357 (241-376)             | 459 (279-492)             |
| 2014 | Thailand                                  | 225 (159-234)             | 335 (226-353)             | 431 (262-462)             |
| 2015 | Thailand                                  | 219 (155-228)             | 327 (220-344)             | 420 (256-450)             |
| 2000 | The former Yugoslav Republic of Macedonia | 11 (8-12)                 | 17 (11-18)                | 22 (13-23)                |
| 2001 | The former Yugoslav Republic of Macedonia | 12 (9-13)                 | 18 (12-19)                | 24 (14-25)                |
| 2002 | The former Yugoslav Republic of Macedonia | 10 (7-11)                 | 15 (10-16)                | 19 (12-21)                |
| 2003 | The former Yugoslav Republic of Macedonia | 9 (7-10)                  | 14 (10-15)                | 18 (11-20)                |
| 2004 | The former Yugoslav Republic of Macedonia | 9 (6-9)                   | 13 (9-13)                 | 16 (10-18)                |
| 2005 | The former Yugoslav Republic of Macedonia | 8 (6-8)                   | 12 (8-12)                 | 15 (9-16)                 |
| 2006 | The former Yugoslav Republic of Macedonia | 7 (5-8)                   | 11 (7-12)                 | 14 (9-15)                 |
| 2007 | The former Yugoslav Republic of Macedonia | 6 (4-6)                   | 9 (6-9)                   | 11 (7-12)                 |
| 2008 | The former Yugoslav Republic of Macedonia | 3 (2-3)                   | 4 (3-4)                   | 5 (3-6)                   |
| 2009 | The former Yugoslav Republic of Macedonia | 7 (5-7)                   | 10 (7-11)                 | 13 (8-14)                 |
| 2010 | The former Yugoslav Republic of Macedonia | 6 (4-6)                   | 8 (6-9)                   | 11 (6-11)                 |
| 2011 | The former Yugoslav Republic of Macedonia | 4 (3-5)                   | 6 (4-7)                   | 8 (5-9)                   |
| 2012 | The former Yugoslav Republic of Macedonia | 4 (3-4)                   | 6 (4-6)                   | 7 (5-8)                   |
| 2013 | The former Yugoslav Republic of Macedonia | 4 (3-4)                   | 6 (4-6)                   | 7 (4-8)                   |
| 2014 | The former Yugoslav Republic of Macedonia | 4 (3-4)                   | 5 (4-6)                   | 7 (4-7)                   |
| 2015 | The former Yugoslav Republic of Macedonia | 3 (2-3)                   | 5 (3-5)                   | 6 (4-7)                   |
| 2000 | Timor-Leste                               | 299 (212-312)             | 446 (301-470)             | 575 (350-615)             |
| 2001 | Timor-Leste                               | 278 (197-289)             | 414 (279-436)             | 533 (324-571)             |
| 2002 | Timor-Leste                               | 256 (181-267)             | 382 (257-402)             | 491 (299-526)             |
| 2003 | Timor-Leste                               | 235 (167-245)             | 351 (236-369)             | 451 (275-483)             |
| 2004 | Timor-Leste                               | 214 (152-223)             | 320 (216-337)             | 411 (250-441)             |
| 2005 | Timor-Leste                               | 193 (137-202)             | 289 (195-304)             | 371 (226-398)             |
| 2006 | Timor-Leste                               | 173 (123-180)             | 258 (174-272)             | 332 (202-356)             |
| 2007 | Timor-Leste                               | 154 (109-160)             | 230 (155-242)             | 296 (180-317)             |
| 2008 | Timor-Leste                               | 140 (99-145)              | 208 (140-219)             | 268 (163-287)             |
| 2009 | Timor-Leste                               | 130 (93-136)              | 195 (131-205)             | 250 (152-268)             |
| 2010 | Timor-Leste                               | 130 (93-136)              | 195 (131-205)             | 250 (152-268)             |
| 2011 | Timor-Leste                               | 134 (95-140)              | 200 (135-211)             | 258 (157-276)             |
| 2012 | Timor-Leste                               | 145 (103-151)             | 217 (146-228)             | 279 (170-299)             |
| 2013 | Timor-Leste                               | 157 (111-163)             | 234 (158-246)             | 301 (183-322)             |
| 2014 | Timor-Leste                               | 164 (116-171)             | 245 (165-258)             | 315 (192-338)             |
| 2015 | Timor-Leste                               | 165 (117-172)             | 247 (166-260)             | 318 (193-340)             |
| 2000 | Togo                                      | 791 (561-824)             | 1180 (796-1243)           | 1519 (924-1626)           |
| 2001 | Togo                                      | 803 (569-836)             | 1197 (807-1261)           | 1541 (937-1650)           |
| 2002 | Togo                                      | 809 (574-843)             | 1207 (814-1271)           | 1553 (945-1663)           |
| 2003 | Togo                                      | 808 (573-842)             | 1205 (813-1269)           | 1551 (944-1661)           |
| 2004 | Togo                                      | 805 (571-839)             | 1200 (809-1264)           | 1545 (940-1654)           |
| 2005 | Togo                                      | 797 (565-831)             | 1189 (802-1252)           | 1530 (931-1639)           |
| 2006 | Togo                                      | 791 (561-824)             | 1180 (796-1243)           | 1519 (924-1627)           |
| 2007 | Togo                                      | 792 (562-825)             | 1181 (797-1244)           | 1520 (925-1628)           |
| 2008 | Togo                                      | 810 (574-844)             | 1208 (815-1272)           | 1555 (946-1665)           |
| 2009 | Togo                                      | 843 (598-878)             | 1257 (848-1324)           | 1618 (984-1733)           |
| 2010 | Togo                                      | 893 (633-930)             | 1331 (898-1402)           | 1713 (1042-1835)          |
| 2011 | Togo                                      | 962 (682-1003)            | 1436 (968-1512)           | 1848 (1124-1979)          |
| 2012 | Togo                                      | 1026 (727-1069)           | 1530 (1032-1611)          | 1969 (1198-2109)          |
| 2013 | Togo                                      | 1059 (751-1103)           | 1579 (1065-1663)          | 2032 (1236-2177)          |
| 2014 | Togo                                      | 950 (674-990)             | 1417 (956-1492)           | 1824 (1109-1953)          |
| 2015 | Togo                                      | 699 (495-728)             | 1042 (703-1098)           | 1341 (816-1437)           |
| 2000 | Tonga                                     | 2 (1-2)                   | 2 (2-3)                   | 3 (2-3)                   |
| 2001 | Tonga                                     | 2 (1-2)                   | 2 (2-3)                   | 3 (2-3)                   |
| 2002 | Tonga                                     | 2 (1-2)                   | 2 (2-2)                   | 3 (2-3)                   |
| 2003 | Tonga                                     | 2 (1-2)                   | 2 (2-2)                   | 3 (2-3)                   |
| 2004 | Tonga                                     | 2 (1-2)                   | 2 (2-2)                   | 3 (2-3)                   |
| 2005 | Tonga                                     | 2 (1-2)                   | 3 (2-3)                   | 3 (2-4)                   |
| 2006 | Tonga                                     | 2 (1-2)                   | 3 (2-3)                   | 3 (2-4)                   |
| 2007 | Tonga                                     | 2 (1-2)                   | 3 (2-3)                   | 3 (2-4)                   |
| 2008 | Tonga                                     | 2 (1-2)                   | 3 (2-3)                   | 3 (2-4)                   |
| 2009 | Tonga                                     | 2 (1-2)                   | 3 (2-3)                   | 4 (2-4)                   |
| 2010 | Tonga                                     | 2 (1-2)                   | 3 (2-3)                   | 4 (2-4)                   |
| 2011 | Tonga                                     | 2 (1-2)                   | 3 (2-3)                   | 4 (2-4)                   |
| 2012 | Tonga                                     | 2 (1-2)                   | 3 (2-3)                   | 3 (2-4)                   |
| 2013 | Tonga                                     | 2 (1-2)                   | 3 (2-3)                   | 3 (2-4)                   |
| 2014 | Tonga                                     | 2 (1-2)                   | 2 (2-3)                   | 3 (2-3)                   |
| 2015 | Tonga                                     | 2 (1-2)                   | 2 (2-3)                   | 3 (2-3)                   |
| 2000 | Trinidad and Tobago                       | 4 (3-4)                   | 5 (4-6)                   | 7 (4-8)                   |
| 2001 | Trinidad and Tobago                       | 5 (4-5)                   | 8 (5-8)                   | 10 (6-10)                 |
| 2002 | Trinidad and Tobago                       | 7 (5-7)                   | 10 (7-10)                 | 13 (8-13)                 |
| 2003 | Trinidad and Tobago                       | 14 (10-14)                | 20 (14-21)                | 26 (16-28)                |
| 2004 | Trinidad and Tobago                       | 11 (8-11)                 | 16 (11-17)                | 21 (13-22)                |
| 2005 | Trinidad and Tobago                       | 10 (7-10)                 | 14 (10-15)                | 18 (11-20)                |
| 2006 | Trinidad and Tobago                       | 7 (5-7)                   | 10 (7-11)                 | 13 (8-14)                 |
| 2007 | Trinidad and Tobago                       | 10 (7-10)                 | 15 (10-16)                | 19 (12-20)                |
| 2008 | Trinidad and Tobago                       | 6 (4-6)                   | 9 (6-9)                   | 11 (7-12)                 |
| 2009 | Trinidad and Tobago                       | 6 (5-7)                   | 10 (6-10)                 | 12 (7-13)                 |
| 2010 | Trinidad and Tobago                       | 7 (5-7)                   | 10 (7-11)                 | 13 (8-14)                 |
| 2011 | Trinidad and Tobago                       | 7 (5-7)                   | 10 (7-11)                 | 13 (8-14)                 |
| 2012 | Trinidad and Tobago                       | 6 (4-6)                   | 9 (6-9)                   | 12 (7-13)                 |
| 2013 | Trinidad and Tobago                       | 5 (3-5)                   | 7 (5-8)                   | 10 (6-11)                 |
| 2014 | Trinidad and Tobago                       | 4 (3-4)                   | 6 (4-6)                   | 9 (5-9)                   |
| 2015 | Trinidad and Tobago                       | 3 (2-3)                   | 5 (4-6)                   | 8 (5-8)                   |
| 2000 | Tunisia                                   | 205 (146-214)             | 306 (206-322)             | 394 (240-422)             |
| 2001 | Tunisia                                   | 182 (129-190)             | 271 (183-286)             | 349 (213-374)             |
| 2002 | Tunisia                                   | 163 (116-170)             | 243 (164-256)             | 313 (191-336)             |
| 2003 | Tunisia                                   | 159 (113-166)             | 237 (160-250)             | 305 (186-327)             |
| 2004 | Tunisia                                   | 146 (104-152)             | 218 (147-229)             | 280 (171-300)             |
| 2005 | Tunisia                                   | 134 (95-139)              | 200 (135-210)             | 257 (156-275)             |
| 2006 | Tunisia                                   | 110 (78-115)              | 164 (111-173)             | 211 (128-226)             |
| 2007 | Tunisia                                   | 102 (72-106)              | 152 (102-160)             | 195 (119-209)             |
| 2008 | Tunisia                                   | 94 (67-98)                | 141 (95-148)              | 181 (110-194)             |
| 2009 | Tunisia                                   | 89 (63-92)                | 132 (89-139)              | 170 (103-182)             |
| 2010 | Tunisia                                   | 83 (59-87)                | 124 (84-131)              | 160 (97-171)              |
| 2011 | Tunisia                                   | 80 (57-84)                | 120 (81-126)              | 154 (94-165)              |
| 2012 | Tunisia                                   | 83 (59-87)                | 124 (84-131)              | 160 (97-171)              |
| 2013 | Tunisia                                   | 81 (57-84)                | 121 (82-127)              | 156 (95-167)              |
| 2014 | Tunisia                                   | 77 (54-80)                | 115 (77-121)              | 147 (90-158)              |
| 2015 | Tunisia                                   | 72 (51-75)                | 107 (72-113)              | 138 (84-148)              |

| Year | Country              | Spn pneumonia deaths (UR) | Spn pneumonia deaths (UR) | Spn pneumonia deaths (UR) |
|------|----------------------|---------------------------|---------------------------|---------------------------|
| 2000 | Turkey               | 1345 (954-1402)           | 2007 (1353-2113)          | 2583 (1571-2766)          |
| 2001 | Turkey               | 1189 (843-1239)           | 1773 (1196-1867)          | 2282 (1388-2444)          |
| 2002 | Turkey               | 1039 (736-1082)           | 1549 (1045-1632)          | 1994 (1213-2136)          |
| 2003 | Turkey               | 913 (647-951)             | 1361 (918-1434)           | 1752 (1066-1877)          |
| 2004 | Turkey               | 802 (569-836)             | 1196 (807-1260)           | 1540 (937-1649)           |
| 2005 | Turkey               | 714 (506-744)             | 1065 (718-1121)           | 1370 (834-1468)           |
| 2006 | Turkey               | 628 (446-655)             | 937 (632-987)             | 1206 (734-1292)           |
| 2007 | Turkey               | 668 (474-697)             | 997 (672-1050)            | 1283 (781-1374)           |
| 2008 | Turkey               | 620 (440-646)             | 925 (623-974)             | 1190 (724-1274)           |
| 2009 | Turkey               | 483 (343-504)             | 747 (504-787)             | 993 (604-1064)            |
| 2010 | Turkey               | 299 (212-312)             | 468 (316-493)             | 629 (383-674)             |
| 2011 | Turkey               | 193 (137-201)             | 320 (216-337)             | 455 (277-488)             |
| 2012 | Turkey               | 135 (95-140)              | 227 (153-239)             | 329 (200-352)             |
| 2013 | Turkey               | 183 (129-190)             | 308 (208-325)             | 448 (273-480)             |
| 2014 | Turkey               | 147 (105-154)             | 249 (168-262)             | 361 (220-386)             |
| 2015 | Turkey               | 139 (98-144)              | 234 (158-246)             | 339 (206-363)             |
| 2000 | Turkmenistan         | 497 (353-518)             | 742 (500-781)             | 955 (581-1022)            |
| 2001 | Turkmenistan         | 482 (342-503)             | 719 (485-758)             | 926 (563-992)             |
| 2002 | Turkmenistan         | 488 (346-509)             | 728 (491-767)             | 937 (570-1003)            |
| 2003 | Turkmenistan         | 504 (358-525)             | 752 (507-792)             | 968 (589-1037)            |
| 2004 | Turkmenistan         | 514 (364-535)             | 766 (517-807)             | 986 (600-1056)            |
| 2005 | Turkmenistan         | 508 (360-530)             | 758 (511-798)             | 975 (593-1045)            |
| 2006 | Turkmenistan         | 493 (350-514)             | 735 (496-774)             | 946 (576-1014)            |
| 2007 | Turkmenistan         | 466 (331-486)             | 695 (469-732)             | 895 (545-959)             |
| 2008 | Turkmenistan         | 431 (305-449)             | 642 (433-676)             | 827 (503-885)             |
| 2009 | Turkmenistan         | 398 (282-414)             | 593 (400-625)             | 763 (464-818)             |
| 2010 | Turkmenistan         | 378 (268-394)             | 564 (380-594)             | 726 (441-777)             |
| 2011 | Turkmenistan         | 363 (258-379)             | 542 (365-571)             | 697 (424-747)             |
| 2012 | Turkmenistan         | 358 (254-373)             | 534 (360-562)             | 687 (418-736)             |
| 2013 | Turkmenistan         | 356 (253-371)             | 532 (359-560)             | 684 (416-733)             |
| 2014 | Turkmenistan         | 354 (251-369)             | 529 (356-557)             | 680 (414-729)             |
| 2015 | Turkmenistan         | 347 (246-363)             | 518 (349-546)             | 667 (406-714)             |
| 2000 | Tuvalu               | 1 (0-1)                   | 1 (1-1)                   | 1 (1-1)                   |
| 2001 | Tuvalu               | 0 (0-0)                   | 1 (0-1)                   | 1 (1-1)                   |
| 2002 | Tuvalu               | 0 (0-0)                   | 1 (0-1)                   | 1 (1-1)                   |
| 2003 | Tuvalu               | 0 (0-0)                   | 1 (0-1)                   | 1 (1-1)                   |
| 2004 | Tuvalu               | 0 (0-0)                   | 0 (0-1)                   | 1 (0-1)                   |
| 2005 | Tuvalu               | 0 (0-0)                   | 0 (0-1)                   | 1 (0-1)                   |
| 2006 | Tuvalu               | 0 (0-0)                   | 0 (0-1)                   | 1 (0-1)                   |
| 2007 | Tuvalu               | 0 (0-0)                   | 0 (0-0)                   | 0 (0-0)                   |
| 2008 | Tuvalu               | 0 (0-0)                   | 0 (0-0)                   | 0 (0-0)                   |
| 2009 | Tuvalu               | 0 (0-0)                   | 1 (0-1)                   | 1 (0-1)                   |
| 2010 | Tuvalu               | 0 (0-0)                   | 0 (0-0)                   | 0 (0-0)                   |
| 2011 | Tuvalu               | 0 (0-0)                   | 0 (0-0)                   | 0 (0-0)                   |
| 2012 | Tuvalu               | 0 (0-0)                   | 0 (0-0)                   | 0 (0-0)                   |
| 2013 | Tuvalu               | 0 (0-0)                   | 0 (0-0)                   | 0 (0-0)                   |
| 2014 | Tuvalu               | 0 (0-0)                   | 0 (0-0)                   | 0 (0-0)                   |
| 2015 | Tuvalu               | 0 (0-0)                   | 0 (0-0)                   | 0 (0-0)                   |
| 2000 | Uganda               | 6651 (4716-6931)          | 9921 (6690-10448)         | 12768 (7768-13675)        |
| 2001 | Uganda               | 6527 (4628-6802)          | 9735 (6565-10253)         | 12529 (7622-13419)        |
| 2002 | Uganda               | 6439 (4566-6710)          | 9604 (6476-10114)         | 12360 (7519-13238)        |
| 2003 | Uganda               | 6252 (4433-6516)          | 9325 (6289-9821)          | 12002 (7302-12855)        |
| 2004 | Uganda               | 6410 (4545-6680)          | 9561 (6448-10070)         | 12306 (7486-13180)        |
| 2005 | Uganda               | 6391 (4532-6660)          | 9533 (6429-10040)         | 12269 (7464-13141)        |
| 2006 | Uganda               | 6086 (4315-6342)          | 9078 (6122-9560)          | 11683 (7108-12513)        |
| 2007 | Uganda               | 5859 (4155-6106)          | 8739 (5894-9204)          | 11248 (6843-12047)        |
| 2008 | Uganda               | 5743 (4072-5985)          | 8566 (5777-9021)          | 11025 (6707-11808)        |
| 2009 | Uganda               | 5521 (3915-5754)          | 8235 (5554-8673)          | 10599 (6448-11352)        |
| 2010 | Uganda               | 5441 (3858-5670)          | 8116 (5473-8547)          | 10445 (6355-11187)        |
| 2011 | Uganda               | 5401 (3830-5629)          | 8056 (5433-8485)          | 10369 (6308-11105)        |
| 2012 | Uganda               | 5371 (3809-5598)          | 8012 (5403-8438)          | 10312 (6273-11044)        |
| 2013 | Uganda               | 5268 (3736-5490)          | 7858 (5299-8275)          | 10113 (6152-10831)        |
| 2014 | Uganda               | 4256 (3018-4436)          | 6349 (4282-6686)          | 8171 (4971-8752)          |
| 2015 | Uganda               | 3626 (2571-3779)          | 5409 (3648-5696)          | 6961 (4235-7456)          |
| 2000 | Ukraine              | 235 (167-245)             | 351 (237-370)             | 452 (275-484)             |
| 2001 | Ukraine              | 207 (147-216)             | 309 (208-325)             | 398 (242-426)             |
| 2002 | Ukraine              | 180 (128-187)             | 268 (181-283)             | 345 (210-370)             |
| 2003 | Ukraine              | 160 (114-167)             | 239 (161-252)             | 307 (187-329)             |
| 2004 | Ukraine              | 144 (102-150)             | 214 (145-226)             | 276 (168-296)             |
| 2005 | Ukraine              | 136 (97-142)              | 203 (137-214)             | 262 (159-280)             |
| 2006 | Ukraine              | 131 (93-137)              | 196 (132-206)             | 252 (153-270)             |
| 2007 | Ukraine              | 153 (108-159)             | 228 (154-240)             | 293 (178-314)             |
| 2008 | Ukraine              | 160 (114-167)             | 239 (161-252)             | 308 (187-330)             |
| 2009 | Ukraine              | 152 (108-158)             | 226 (153-238)             | 291 (177-312)             |
| 2010 | Ukraine              | 147 (104-153)             | 220 (148-231)             | 283 (172-303)             |
| 2011 | Ukraine              | 129 (91-134)              | 192 (129-202)             | 247 (150-265)             |
| 2012 | Ukraine              | 129 (92-135)              | 193 (130-203)             | 248 (151-266)             |
| 2013 | Ukraine              | 113 (80-118)              | 169 (114-178)             | 217 (132-233)             |
| 2014 | Ukraine              | 98 (69-102)               | 146 (99-154)              | 188 (114-201)             |
| 2015 | Ukraine              | 85 (60-89)                | 127 (86-134)              | 164 (99-175)              |
| 2000 | United Arab Emirates | 12 (9-13)                 | 18 (12-19)                | 24 (14-25)                |
| 2001 | United Arab Emirates | 12 (8-12)                 | 17 (12-18)                | 22 (14-24)                |
| 2002 | United Arab Emirates | 11 (8-11)                 | 16 (11-17)                | 20 (12-22)                |
| 2003 | United Arab Emirates | 10 (7-11)                 | 15 (10-16)                | 20 (12-21)                |
| 2004 | United Arab Emirates | 11 (7-11)                 | 16 (11-17)                | 20 (12-22)                |
| 2005 | United Arab Emirates | 11 (8-11)                 | 16 (11-17)                | 21 (13-23)                |
| 2006 | United Arab Emirates | 11 (8-12)                 | 17 (11-18)                | 22 (13-23)                |
| 2007 | United Arab Emirates | 12 (9-13)                 | 19 (13-20)                | 24 (15-26)                |
| 2008 | United Arab Emirates | 13 (9-14)                 | 20 (13-21)                | 25 (15-27)                |
| 2009 | United Arab Emirates | 13 (10-14)                | 20 (14-21)                | 26 (16-28)                |
| 2010 | United Arab Emirates | 10 (7-11)                 | 17 (11-17)                | 22 (14-24)                |
| 2011 | United Arab Emirates | 8 (6-9)                   | 14 (9-15)                 | 20 (12-21)                |
| 2012 | United Arab Emirates | 7 (5-7)                   | 12 (8-13)                 | 18 (11-19)                |
| 2013 | United Arab Emirates | 7 (5-7)                   | 11 (7-12)                 | 16 (10-17)                |
| 2014 | United Arab Emirates | 5 (3-5)                   | 8 (6-9)                   | 13 (8-14)                 |
| 2015 | United Arab Emirates | 4 (3-4)                   | 7 (5-8)                   | 11 (7-12)                 |
| 2000 | United Kingdom       | 66 (47-69)                | 99 (67-104)               | 127 (77-136)              |
| 2001 | United Kingdom       | 65 (46-68)                | 97 (65-102)               | 124 (76-133)              |
| 2002 | United Kingdom       | 52 (37-55)                | 78 (53-82)                | 101 (61-108)              |
| 2003 | United Kingdom       | 51 (36-53)                | 76 (51-80)                | 97 (59-104)               |
| 2004 | United Kingdom       | 53 (38-55)                | 79 (53-83)                | 102 (62-109)              |
| 2005 | United Kingdom       | 57 (41-60)                | 85 (57-90)                | 110 (67-118)              |
| 2006 | United Kingdom       | 54 (38-56)                | 80 (54-85)                | 104 (63-111)              |
| 2007 | United Kingdom       | 43 (31-45)                | 68 (46-71)                | 91 (55-98)                |
| 2008 | United Kingdom       | 43 (31-45)                | 70 (47-74)                | 98 (59-105)               |
| 2009 | United Kingdom       | 44 (31-45)                | 70 (48-74)                | 98 (60-105)               |
| 2010 | United Kingdom       | 31 (22-32)                | 53 (35-55)                | 77 (47-82)                |
| 2011 | United Kingdom       | 21 (15-22)                | 38 (25-40)                | 59 (36-63)                |
| 2012 | United Kingdom       | 14 (10-14)                | 25 (17-26)                | 40 (25-43)                |

| Year | Country                            | Spn pneumonia deaths (UR) | Spn pneumonia deaths (UR) | Spn pneumonia deaths (UR) |
|------|------------------------------------|---------------------------|---------------------------|---------------------------|
| 2013 | United Kingdom                     | 9 (7-10)                  | 18 (12-19)                | 29 (17-31)                |
| 2014 | United Kingdom                     | 11 (8-11)                 | 20 (14-21)                | 33 (20-35)                |
| 2015 | United Kingdom                     | 10 (7-11)                 | 19 (13-20)                | 31 (19-33)                |
| 2000 | United Republic of Tanzania        | 9438 (6692-9836)          | 14077 (9493-14826)        | 18118 (11022-19405)       |
| 2001 | United Republic of Tanzania        | 9111 (6461-9495)          | 13590 (9165-14131)        | 17491 (10641-18734)       |
| 2002 | United Republic of Tanzania        | 8701 (6170-9068)          | 12979 (8752-13669)        | 16704 (10162-17890)       |
| 2003 | United Republic of Tanzania        | 8774 (6222-9144)          | 13088 (8826-13784)        | 16845 (10247-18041)       |
| 2004 | United Republic of Tanzania        | 8545 (6060-8906)          | 12746 (8596-13424)        | 16405 (9980-17570)        |
| 2005 | United Republic of Tanzania        | 8284 (5874-8634)          | 12357 (8333-13014)        | 15904 (9675-17033)        |
| 2006 | United Republic of Tanzania        | 7985 (5662-8322)          | 11910 (8032-12544)        | 15329 (9326-16418)        |
| 2007 | United Republic of Tanzania        | 7516 (5330-7833)          | 11211 (7561-11807)        | 14429 (8778-15454)        |
| 2008 | United Republic of Tanzania        | 7122 (5050-7422)          | 10623 (7164-11188)        | 13672 (8317-14643)        |
| 2009 | United Republic of Tanzania        | 6813 (4831-7100)          | 10162 (6853-10703)        | 13079 (7957-14008)        |
| 2010 | United Republic of Tanzania        | 6586 (4670-6863)          | 9823 (6624-10345)         | 12643 (7691-13541)        |
| 2011 | United Republic of Tanzania        | 6369 (4516-6637)          | 9500 (6406-10005)         | 12227 (7438-13095)        |
| 2012 | United Republic of Tanzania        | 6297 (4465-6562)          | 9392 (6334-9892)          | 12088 (7354-12947)        |
| 2013 | United Republic of Tanzania        | 4423 (3136-4610)          | 6597 (4449-6948)          | 8491 (5166-9094)          |
| 2014 | United Republic of Tanzania        | 3466 (2458-3612)          | 5170 (3486-5445)          | 6654 (4048-7126)          |
| 2015 | United Republic of Tanzania        | 2942 (2086-3066)          | 4388 (2959-4622)          | 5648 (3436-6049)          |
| 2000 | United States of America           | 375 (266-391)             | 559 (377-589)             | 719 (438-771)             |
| 2001 | United States of America           | 385 (273-401)             | 574 (387-605)             | 739 (450-792)             |
| 2002 | United States of America           | 339 (240-353)             | 518 (349-545)             | 681 (414-729)             |
| 2003 | United States of America           | 338 (240-352)             | 537 (362-566)             | 734 (447-786)             |
| 2004 | United States of America           | 285 (202-297)             | 462 (312-487)             | 644 (392-689)             |
| 2005 | United States of America           | 227 (161-237)             | 380 (256-400)             | 546 (332-585)             |
| 2006 | United States of America           | 266 (188-277)             | 435 (293-458)             | 611 (372-654)             |
| 2007 | United States of America           | 224 (159-233)             | 369 (249-388)             | 523 (318-560)             |
| 2008 | United States of America           | 246 (174-256)             | 404 (272-425)             | 569 (346-609)             |
| 2009 | United States of America           | 268 (190-279)             | 437 (295-461)             | 614 (373-657)             |
| 2010 | United States of America           | 192 (136-200)             | 320 (216-337)             | 458 (279-490)             |
| 2011 | United States of America           | 133 (94-139)              | 236 (159-249)             | 365 (222-391)             |
| 2012 | United States of America           | 81 (57-84)                | 148 (100-156)             | 236 (144-253)             |
| 2013 | United States of America           | 65 (46-67)                | 119 (80-125)              | 193 (118-207)             |
| 2014 | United States of America           | 63 (45-66)                | 117 (79-124)              | 192 (117-206)             |
| 2015 | United States of America           | 61 (43-64)                | 113 (77-119)              | 186 (113-199)             |
| 2000 | Uruguay                            | 29 (20-30)                | 43 (29-45)                | 55 (34-59)                |
| 2001 | Uruguay                            | 35 (25-37)                | 52 (35-55)                | 67 (41-72)                |
| 2002 | Uruguay                            | 32 (23-33)                | 48 (32-50)                | 61 (37-66)                |
| 2003 | Uruguay                            | 31 (22-32)                | 46 (31-48)                | 59 (36-63)                |
| 2004 | Uruguay                            | 23 (16-24)                | 34 (23-36)                | 44 (27-47)                |
| 2005 | Uruguay                            | 29 (20-30)                | 43 (29-45)                | 55 (34-59)                |
| 2006 | Uruguay                            | 27 (19-28)                | 40 (27-42)                | 51 (31-55)                |
| 2007 | Uruguay                            | 31 (22-33)                | 47 (32-49)                | 60 (37-64)                |
| 2008 | Uruguay                            | 28 (20-30)                | 42 (29-45)                | 55 (33-58)                |
| 2009 | Uruguay                            | 27 (19-28)                | 41 (27-43)                | 52 (32-56)                |
| 2010 | Uruguay                            | 15 (10-15)                | 23 (16-25)                | 32 (20-35)                |
| 2011 | Uruguay                            | 10 (7-11)                 | 17 (12-18)                | 25 (15-27)                |
| 2012 | Uruguay                            | 9 (6-9)                   | 15 (10-15)                | 21 (13-23)                |
| 2013 | Uruguay                            | 5 (4-5)                   | 9 (6-9)                   | 13 (8-14)                 |
| 2014 | Uruguay                            | 5 (3-5)                   | 9 (6-9)                   | 13 (8-14)                 |
| 2015 | Uruguay                            | 4 (3-4)                   | 7 (5-8)                   | 11 (7-12)                 |
| 2000 | Uzbekistan                         | 1912 (1356-1993)          | 2852 (1923-3004)          | 3670 (2233-3931)          |
| 2001 | Uzbekistan                         | 1807 (1281-1883)          | 2696 (1818-2839)          | 3469 (2111-3716)          |
| 2002 | Uzbekistan                         | 1713 (1215-1785)          | 2555 (1723-2691)          | 3289 (2001-3522)          |
| 2003 | Uzbekistan                         | 1627 (1154-1695)          | 2427 (1636-2556)          | 3123 (1900-3345)          |
| 2004 | Uzbekistan                         | 1573 (1115-1639)          | 2346 (1582-2471)          | 3020 (1837-3234)          |
| 2005 | Uzbekistan                         | 1527 (1083-1592)          | 2278 (1536-2400)          | 2932 (1784-3141)          |
| 2006 | Uzbekistan                         | 1509 (1070-1572)          | 2250 (1517-2370)          | 2896 (1762-3102)          |
| 2007 | Uzbekistan                         | 1500 (1064-1563)          | 2238 (1509-2357)          | 2880 (1752-3085)          |
| 2008 | Uzbekistan                         | 1510 (1071-1574)          | 2253 (1519-2372)          | 2899 (1764-3105)          |
| 2009 | Uzbekistan                         | 1514 (1073-1578)          | 2258 (1523-2378)          | 2906 (1768-3112)          |
| 2010 | Uzbekistan                         | 1510 (1071-1574)          | 2253 (1519-2373)          | 2899 (1764-3105)          |
| 2011 | Uzbekistan                         | 1489 (1056-1552)          | 2221 (1498-2339)          | 2858 (1739-3061)          |
| 2012 | Uzbekistan                         | 1457 (1033-1518)          | 2173 (1466-2289)          | 2797 (1702-2996)          |
| 2013 | Uzbekistan                         | 1415 (1004-1475)          | 2111 (1424-2233)          | 2717 (1653-2910)          |
| 2014 | Uzbekistan                         | 1374 (974-1432)           | 2049 (1382-2158)          | 2638 (1605-2825)          |
| 2015 | Uzbekistan                         | 1309 (928-1364)           | 1952 (1317-2056)          | 2513 (1529-2691)          |
| 2000 | Vansatu                            | 7 (5-8)                   | 11 (7-12)                 | 14 (9-15)                 |
| 2001 | Vansatu                            | 7 (5-8)                   | 11 (7-12)                 | 14 (9-15)                 |
| 2002 | Vansatu                            | 6 (4-6)                   | 9 (6-9)                   | 11 (7-12)                 |
| 2003 | Vansatu                            | 5 (3-5)                   | 7 (5-8)                   | 9 (6-10)                  |
| 2004 | Vansatu                            | 5 (4-5)                   | 8 (5-8)                   | 10 (6-11)                 |
| 2005 | Vansatu                            | 7 (5-7)                   | 10 (7-11)                 | 13 (8-14)                 |
| 2006 | Vansatu                            | 7 (5-8)                   | 11 (7-11)                 | 14 (9-15)                 |
| 2007 | Vansatu                            | 8 (6-8)                   | 12 (8-12)                 | 15 (9-16)                 |
| 2008 | Vansatu                            | 8 (6-9)                   | 12 (8-13)                 | 16 (10-17)                |
| 2009 | Vansatu                            | 9 (6-9)                   | 13 (9-13)                 | 16 (10-18)                |
| 2010 | Vansatu                            | 9 (6-9)                   | 13 (9-14)                 | 17 (10-18)                |
| 2011 | Vansatu                            | 9 (7-10)                  | 14 (9-15)                 | 18 (11-19)                |
| 2012 | Vansatu                            | 10 (7-10)                 | 15 (10-15)                | 19 (11-20)                |
| 2013 | Vansatu                            | 9 (7-10)                  | 14 (9-15)                 | 18 (11-19)                |
| 2014 | Vansatu                            | 9 (6-9)                   | 13 (9-14)                 | 17 (11-19)                |
| 2015 | Vansatu                            | 9 (6-9)                   | 13 (9-14)                 | 17 (10-18)                |
| 2000 | Venezuela (Bolivarian Republic of) | 277 (197-289)             | 413 (279-435)             | 532 (324-570)             |
| 2001 | Venezuela (Bolivarian Republic of) | 362 (256-377)             | 539 (364-568)             | 694 (422-743)             |
| 2002 | Venezuela (Bolivarian Republic of) | 313 (222-327)             | 467 (315-492)             | 601 (366-644)             |
| 2003 | Venezuela (Bolivarian Republic of) | 367 (260-382)             | 547 (369-576)             | 704 (428-754)             |
| 2004 | Venezuela (Bolivarian Republic of) | 382 (271-399)             | 570 (385-601)             | 734 (447-786)             |
| 2005 | Venezuela (Bolivarian Republic of) | 342 (243-357)             | 511 (344-538)             | 657 (400-704)             |
| 2006 | Venezuela (Bolivarian Republic of) | 346 (245-360)             | 516 (348-543)             | 664 (404-711)             |
| 2007 | Venezuela (Bolivarian Republic of) | 317 (225-330)             | 473 (319-490)             | 608 (370-652)             |
| 2008 | Venezuela (Bolivarian Republic of) | 298 (212-311)             | 445 (300-469)             | 573 (348-613)             |
| 2009 | Venezuela (Bolivarian Republic of) | 282 (200-294)             | 421 (284-443)             | 542 (329-580)             |
| 2010 | Venezuela (Bolivarian Republic of) | 272 (193-284)             | 406 (274-428)             | 523 (318-560)             |
| 2011 | Venezuela (Bolivarian Republic of) | 287 (203-299)             | 428 (289-451)             | 551 (335-590)             |
| 2012 | Venezuela (Bolivarian Republic of) | 273 (193-284)             | 407 (274-428)             | 523 (318-560)             |
| 2013 | Venezuela (Bolivarian Republic of) | 265 (188-277)             | 396 (267-417)             | 509 (310-546)             |
| 2014 | Venezuela (Bolivarian Republic of) | 262 (185-273)             | 390 (263-411)             | 502 (305-538)             |
| 2015 | Venezuela (Bolivarian Republic of) | 239 (170-249)             | 363 (245-383)             | 475 (289-509)             |
| 2000 | Viet Nam                           | 2253 (1597-2348)          | 3360 (2266-3539)          | 4325 (2631-4632)          |
| 2001 | Viet Nam                           | 2090 (1482-2178)          | 3117 (2102-3283)          | 4012 (2440-4296)          |
| 2002 | Viet Nam                           | 2059 (1460-2146)          | 3072 (2072-3235)          | 3954 (2405-4234)          |
| 2003 | Viet Nam                           | 2063 (1463-2150)          | 3077 (2075-3240)          | 3960 (2409-4241)          |
| 2004 | Viet Nam                           | 2033 (1442-2119)          | 3033 (2045-3194)          | 3903 (2375-4181)          |
| 2005 | Viet Nam                           | 1970 (1397-2053)          | 2938 (1981-3094)          | 3782 (2301-4050)          |
| 2006 | Viet Nam                           | 1885 (1337-1965)          | 2812 (1896-2962)          | 3619 (2202-3876)          |
| 2007 | Viet Nam                           | 1768 (1254-1843)          | 2638 (1779-2778)          | 3395 (2065-3636)          |
| 2008 | Viet Nam                           | 1631 (1157-1700)          | 2433 (1641-2563)          | 3132 (1905-3354)          |
| 2009 | Viet Nam                           | 1515 (1075-1579)          | 2260 (1524-2381)          | 2909 (1770-3116)          |

Spn = Streptococcus pneumoniae; Uncertainty range provided in parentheses.

| Year | Country  | Spn pneumonia deaths (UR) | Spn pneumonia deaths (UR) | Spn pneumonia deaths (UR) |
|------|----------|---------------------------|---------------------------|---------------------------|
| 2010 | Viet Nam | 1528 (1084-1593)          | 2279 (1537-2401)          | 2934 (1785-3142)          |
| 2011 | Viet Nam | 1552 (1101-1618)          | 2315 (1561-2438)          | 2980 (1813-3191)          |
| 2012 | Viet Nam | 1499 (1063-1562)          | 2235 (1507-2354)          | 2877 (1750-3081)          |
| 2013 | Viet Nam | 1469 (1042-1531)          | 2192 (1478-2308)          | 2821 (1716-3021)          |
| 2014 | Viet Nam | 1462 (1037-1524)          | 2181 (1471-2297)          | 2807 (1707-3006)          |
| 2015 | Viet Nam | 1430 (1014-1490)          | 2133 (1439-2247)          | 2745 (1670-2940)          |
| 2000 | Yemen    | 3924 (2782-4089)          | 5853 (3947-6164)          | 7533 (4583-8068)          |
| 2001 | Yemen    | 3719 (2637-3876)          | 5547 (3741-5842)          | 7139 (4343-7646)          |
| 2002 | Yemen    | 3547 (2515-3697)          | 5291 (3568-5572)          | 6810 (4143-7293)          |
| 2003 | Yemen    | 3412 (2419-3555)          | 5089 (3432-5359)          | 6549 (3984-7015)          |
| 2004 | Yemen    | 3277 (2324-3415)          | 4888 (3296-5148)          | 6291 (3827-6738)          |
| 2005 | Yemen    | 3136 (2224-3268)          | 4678 (3154-4926)          | 6020 (3662-6448)          |
| 2006 | Yemen    | 2986 (2117-3112)          | 4453 (3003-4690)          | 5732 (3487-6139)          |
| 2007 | Yemen    | 2835 (2010-2954)          | 4228 (2851-4453)          | 5442 (3311-5828)          |
| 2008 | Yemen    | 2667 (1891-2779)          | 3978 (2683-4190)          | 5120 (3115-5484)          |
| 2009 | Yemen    | 2511 (1781-2617)          | 3746 (2526-3945)          | 4821 (2933-5163)          |
| 2010 | Yemen    | 2349 (1666-2448)          | 3504 (2363-3691)          | 4510 (2744-4831)          |
| 2011 | Yemen    | 1780 (1262-1855)          | 2655 (1790-2796)          | 3417 (2079-3660)          |
| 2012 | Yemen    | 1345 (954-1401)           | 2006 (1353-2113)          | 2582 (1571-2765)          |
| 2013 | Yemen    | 1160 (823-1209)           | 1731 (1167-1823)          | 2227 (1355-2386)          |
| 2014 | Yemen    | 1075 (762-1120)           | 1604 (1081-1689)          | 2064 (1256-2210)          |
| 2015 | Yemen    | 641 (454-668)             | 956 (645-1007)            | 1230 (749-1318)           |
| 2000 | Zambia   | 3828 (2714-3889)          | 5710 (3850-6013)          | 7348 (4470-7870)          |
| 2001 | Zambia   | 3700 (2638-3877)          | 5549 (3742-5844)          | 7142 (4345-7650)          |
| 2002 | Zambia   | 3543 (2512-3692)          | 5284 (3564-5565)          | 6801 (4138-7284)          |
| 2003 | Zambia   | 3356 (2380-3498)          | 5006 (3376-5272)          | 6443 (3920-6901)          |
| 2004 | Zambia   | 3209 (2275-3344)          | 4786 (3228-5041)          | 6160 (3748-6598)          |
| 2005 | Zambia   | 3101 (2199-3231)          | 4625 (3119-4871)          | 5952 (3621-6375)          |
| 2006 | Zambia   | 3029 (2148-3157)          | 4519 (3047-4759)          | 5816 (3538-6229)          |
| 2007 | Zambia   | 2988 (2119-3114)          | 4457 (3005-4694)          | 5736 (3489-6143)          |
| 2008 | Zambia   | 2966 (2103-3091)          | 4424 (2983-4659)          | 5694 (3464-6098)          |
| 2009 | Zambia   | 2921 (2072-3044)          | 4357 (2939-4589)          | 5608 (3412-6006)          |
| 2010 | Zambia   | 2863 (2030-2984)          | 4271 (2880-4498)          | 5497 (3344-5888)          |
| 2011 | Zambia   | 2786 (1975-2903)          | 4155 (2802-4376)          | 5348 (3253-5727)          |
| 2012 | Zambia   | 2672 (1895-2785)          | 3986 (2688-4198)          | 5130 (3121-5494)          |
| 2013 | Zambia   | 2551 (1809-2659)          | 3806 (2566-4008)          | 4898 (2980-5246)          |
| 2014 | Zambia   | 1834 (1300-1911)          | 2735 (1845-2881)          | 3521 (2142-3771)          |
| 2015 | Zambia   | 1509 (1070-1572)          | 2251 (1518-2370)          | 2897 (1762-3102)          |
| 2000 | Zimbabwe | 1604 (1137-1671)          | 2392 (1613-2519)          | 3079 (1873-3297)          |
| 2001 | Zimbabwe | 1655 (1174-1725)          | 2469 (1665-2600)          | 3177 (1933-3403)          |
| 2002 | Zimbabwe | 1731 (1227-1803)          | 2581 (1741-2718)          | 3322 (2021-3558)          |
| 2003 | Zimbabwe | 1821 (1291-1898)          | 2716 (1832-2860)          | 3496 (2127-3744)          |
| 2004 | Zimbabwe | 1927 (1366-2008)          | 2874 (1938-3027)          | 3699 (2251-3962)          |
| 2005 | Zimbabwe | 2045 (1450-2132)          | 3051 (2057-3213)          | 3927 (2389-4205)          |
| 2006 | Zimbabwe | 2143 (1519-2233)          | 3196 (2155-3366)          | 4114 (2503-4406)          |
| 2007 | Zimbabwe | 2234 (1584-2328)          | 3332 (2247-3509)          | 4288 (2608-4592)          |
| 2008 | Zimbabwe | 2308 (1636-2405)          | 3442 (2321-3625)          | 4430 (2695-4745)          |
| 2009 | Zimbabwe | 2364 (1676-2464)          | 3526 (2378-3714)          | 4538 (2761-4861)          |
| 2010 | Zimbabwe | 2392 (1696-2493)          | 3568 (2406-3757)          | 4592 (2793-4918)          |
| 2011 | Zimbabwe | 2409 (1708-2510)          | 3593 (2423-3784)          | 4624 (2813-4952)          |
| 2012 | Zimbabwe | 2179 (1545-2271)          | 3250 (2192-3423)          | 4183 (2545-4480)          |
| 2013 | Zimbabwe | 1467 (1040-1529)          | 2188 (1476-2305)          | 2817 (1713-3017)          |
| 2014 | Zimbabwe | 1269 (900-1323)           | 1893 (1277-1994)          | 2437 (1482-2610)          |
| 2015 | Zimbabwe | 1168 (828-1217)           | 1742 (1175-1835)          | 2243 (1364-2402)          |

**Webappendix 13:** Comparison of meningitis mortality and morbidity estimates, proportional approach versus incidence approach

*Figure 10: Pneumococcal meningitis cases by approach for 2000-2015 (bars indicate uncertainty ranges)*

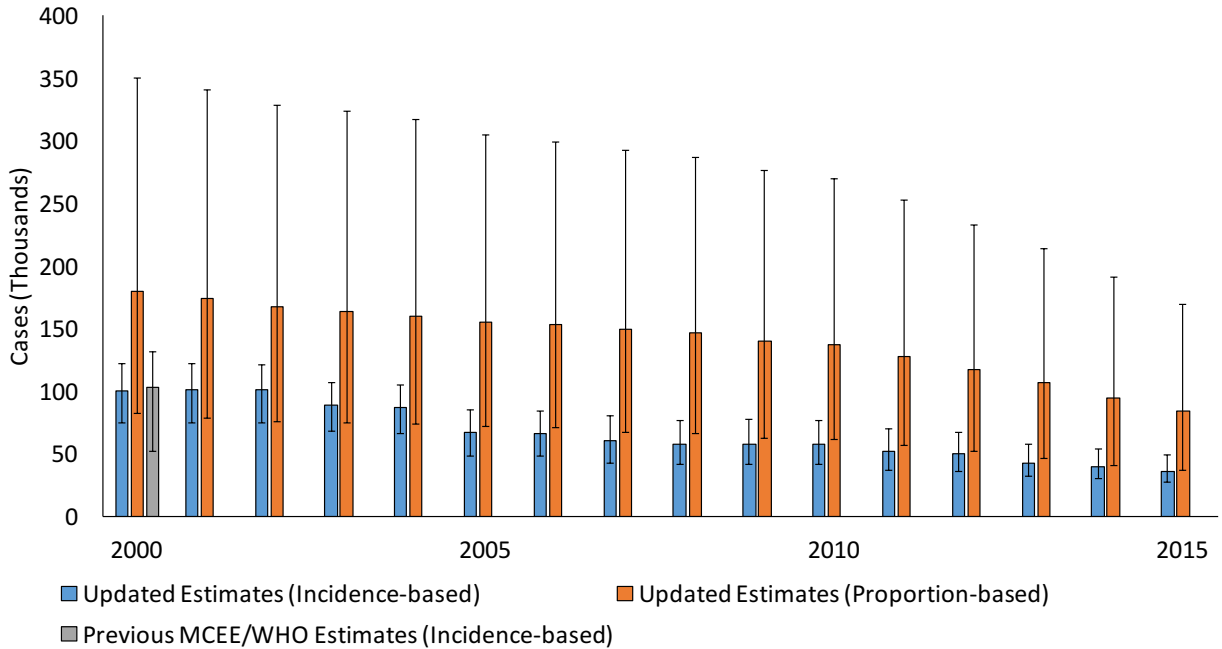

*Figure 11: Pneumococcal meningitis deaths by approach for 2000-2015 (bars indicate uncertainty ranges)*

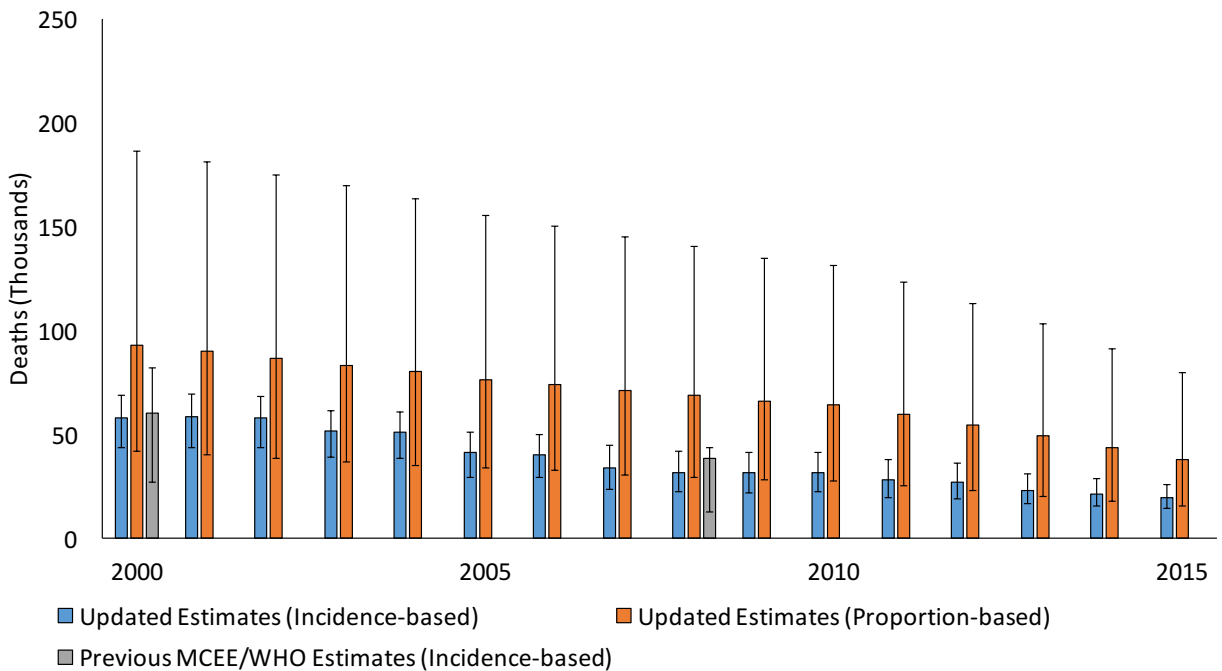



Figure 12: Hib meningitis cases by approach for 2000-2015 (bars indicate uncertainty ranges)

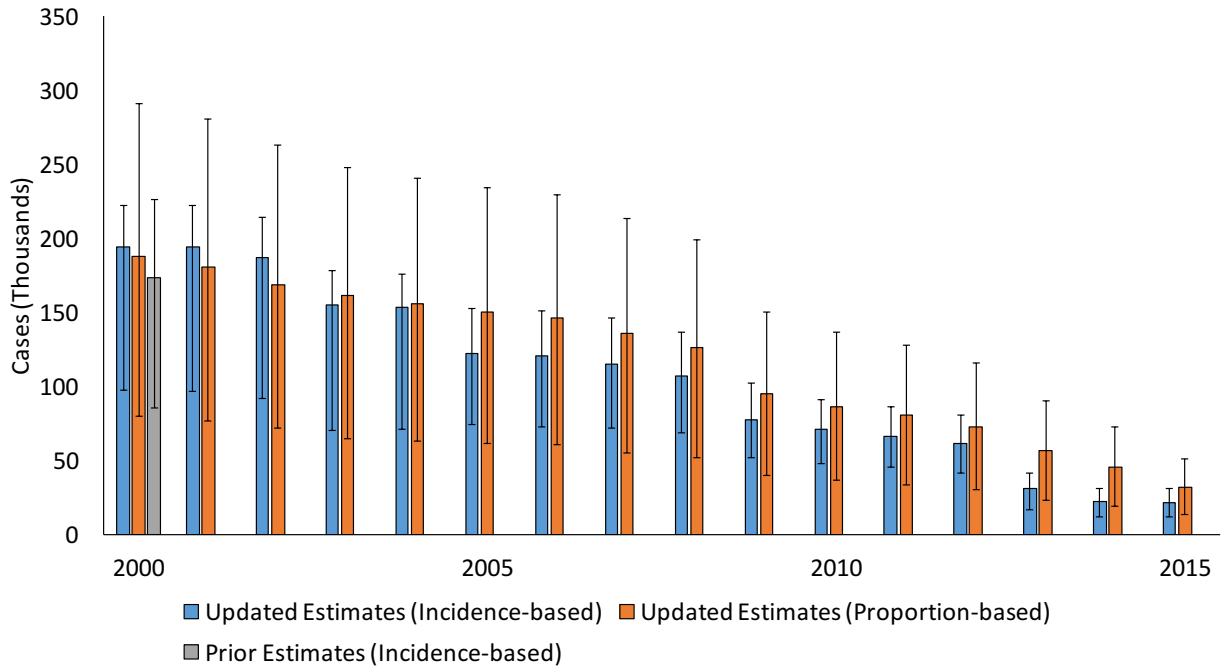

Figure 13: Hib meningitis deaths by approach for 2000-2015 (bars indicate uncertainty ranges)

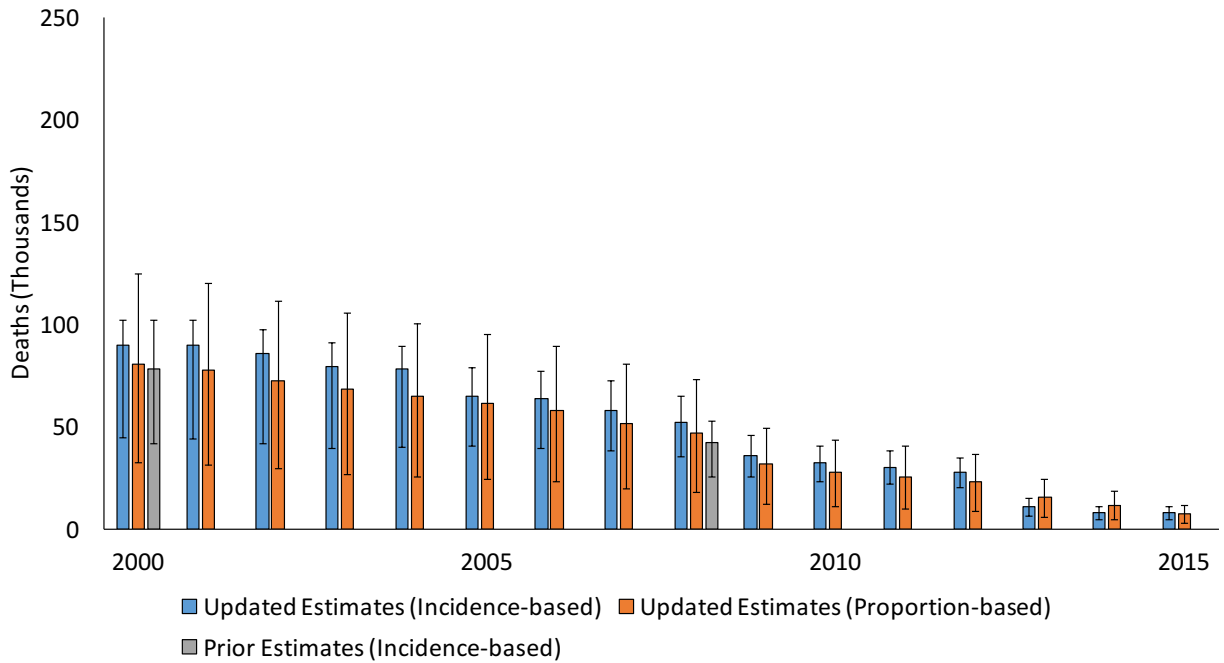

#### **Webappendix 14:** Plausibility check for pneumococcal morbidity and mortality

We checked the plausibility of our pneumococcal morbidity estimates for Bangladesh and Mozambique. A population-based, active-surveillance, active-case finding study conducted in Bangladesh<sup>10</sup> measured an IPD incidence of 447 cases 100,000 children less than 5 years. A clinic-based, passive-surveillance study conducted in Mozambique<sup>11</sup> found an IPD incidence of 416 cases per 100,000 children less than 5 years. We adjusted these estimates using the ratio of clinical pneumonia cases prevented per 1,000 children (i.e., 17) to IPD prevented per 1,000 children (i.e., 1.9) in a PCV trial from The Gambia to account for the lack of diagnostic sensitivity of IPD for all pneumococcal disease.<sup>12</sup> Our modeled values underestimated the pneumococcal disease burden by 39% in Bangladesh and 24% in Mozambique in the same years the studies were conducted, however the uncertainty ranges for the modeled estimates include the values observed in each of the two studies.

An RCT of PCV conducted in The Gambia was used to validate the output of our pneumococcal mortality models. The trial measured a 16% (95% CI: 3-28%) reduction in all-cause mortality in children 3-29 months and a 50% (95% CI: 21-69%) reduction in all-serotype IPD.<sup>12</sup> These results together imply that 32% (95% CI: 10-54%) of all deaths in the control group were attributable to pneumococcus, assuming that the serotype distribution of IPD and PCV efficacy against VT IPD was similar to that of pneumococcal deaths. We disaggregated our modeled 1-59 month old mortality estimates for The Gambia using regional data from a review of the age distribution of pneumococcal deaths<sup>13</sup> to determine the number of pneumococcal deaths estimated in children 3-23 months. We also used observational data from a study conducted in The Gambia<sup>14</sup> to estimate all-cause child deaths from the United Nations (UN) Inter-agency Group for Child Mortality Estimation (IGME) occurring in children 3-23 months.<sup>15</sup> The modeled estimate of the proportion of all-cause mortality accounted for by pneumococcus in this 3-23 month age group in The Gambia (17%) was lower than the inferred point estimate from the trial but was within the confidence intervals, indicating that our point estimate of disease burden may be an underestimate.

We were unable to validate the plausibility of our Hib cases and deaths because there was no other study that independently quantified the burden accounting for the poor diagnostic sensitivity.

## References

1. Lucero MG, Dulalia VE, Nillos LT, et al. Pneumococcal conjugate vaccines for preventing vaccine-type invasive pneumococcal disease and X-ray defined pneumonia in children less than two years of age. *The Cochrane database of systematic reviews* 2009; (4): CD004977.
2. Knoll M, O'Brien K, Henkle E, et al. Global literature review of Haemophilus influenzae type b and Streptococcus pneumoniae invasive disease among children less than five years of age, 1980–2005. *Geneva, Switzerland: World Health Organization* 2009.
3. Feikin DR, Nelson CB, Watt JP, Mohsni E, Wenger JD, Levine OS. Rapid assessment tool for Haemophilus influenzae type b disease in developing countries. *Emerging infectious diseases* 2004; **10**(7): 1270-6.
4. Griffin MR, Zhu Y, Moore MR, Whitney CG, Grijalva CG. U.S. hospitalizations for pneumonia after a decade of pneumococcal vaccination. *The New England journal of medicine* 2013; **369**(2): 155-63.
5. Schuck-Paim C, Taylor RJ, Simonsen L, et al. Challenges to estimating vaccine impact using hospitalization data. *Vaccine* 2017; **35**(1): 118-24.
6. Bonten MJ, Huijts SM, Bolkenbaas M, et al. Polysaccharide conjugate vaccine against pneumococcal pneumonia in adults. *The New England journal of medicine* 2015; **372**(12): 1114-25.
7. Pavia M, Bianco A, Nobile CG, Marinelli P, Angelillo IF. Efficacy of pneumococcal vaccination in children younger than 24 months: a meta-analysis. *Pediatrics* 2009; **123**(6): e1103-10.
8. Le Polain De Waroux O, Flasche S, Prieto-Merino D, Goldblatt D, Edmunds WJ. The Efficacy and Duration of Protection of Pneumococcal Conjugate Vaccines Against Nasopharyngeal Carriage: A Meta-regression Model. *The Pediatric infectious disease journal* 2015; **34**(8): 858-64.
9. You D, Hug L, Ejdemyr S, et al. Global, regional, and national levels and trends in under-5 mortality between 1990 and 2015, with scenario-based projections to 2030: a systematic analysis by the UN Inter-agency Group for Child Mortality Estimation. *Lancet* 2015; **386**(10010): 2275-86.
10. Wolfson L, O'Brien K, Watt J, Henkle E, Deloria-Knoll M, McCall N. Methods to estimate the global burden of disease due to Haemophilus influenzae type b and Streptococcus pneumoniae in children less than 5 years of age. *Lancet Web annex* 2009: 893-902.
11. O'Brien KL, Wolfson LJ, Watt JP, et al. Burden of disease caused by Streptococcus pneumoniae in children younger than 5 years: global estimates. *Lancet* 2009; **374**(9693): 893-902.
12. Watt JP, Wolfson LJ, O'Brien KL, et al. Burden of disease caused by Haemophilus influenzae type b in children younger than 5 years: global estimates. *Lancet* 2009; **374**(9693): 903-11.
